# Supplementary material for: REVIVE: a computational platform for systematically identifying rejuvenating chemical and genetic perturbations
Source: Aging (Albany NY). 2025 Nov 25;17(11):2844–58. doi: 10.18632/aging.206342 (PMC12705183; doi:10.18632/aging.206342)
Supplement: Supplementary Table 1 [file aging-17-11-206342-s002.xlsx]

## Sheet: TrainingsSamples_Final
Supplementary Table 1. Samples used for training the transcriptional clock.
SRS	GSM	Term	TermName	Value	ValueChr	Unit	UnitName	Cell/Tissue Type
SRS1079506	GSM1890726	EFO:0000246	age	55	55Y	UO:0000036	year	Colon
SRS1079507	GSM1890725	EFO:0000246	age	55	55Y	UO:0000036	year	Colon
SRS1079508	GSM1890724	EFO:0000246	age	55	55Y	UO:0000036	year	Colon
SRS1228754	GSM2011222	EFO:0000246	age	42	42Y	UO:0000036	year	Epithelial Cell
SRS1228755	GSM2011221	EFO:0000246	age	42	42Y	UO:0000036	year	Epithelial Cell
SRS1228756	GSM2011220	EFO:0000246	age	42	42Y	UO:0000036	year	Epithelial Cell
SRS1244403	GSM2036330	EFO:0000246	age	65	65	UO:0000036	year	Aorta
SRS1244404	GSM2036329	EFO:0000246	age	60	60	UO:0000036	year	Aorta
SRS1244406	GSM2036327	EFO:0000246	age	61	61	UO:0000036	year	Aorta
SRS1244408	GSM2036325	EFO:0000246	age	66	66	UO:0000036	year	Aorta
SRS1244409	GSM2036324	EFO:0000246	age	67	67	UO:0000036	year	Aorta
SRS1244411	GSM2036322	EFO:0000246	age	57	57	UO:0000036	year	Aorta
SRS1244776	GSM2036539	EFO:0000246	age	59	59	UO:0000036	year	Aorta
SRS1244777	GSM2036538	EFO:0000246	age	63	63	UO:0000036	year	Aorta
SRS1244780	GSM2036535	EFO:0000246	age	65	65	UO:0000036	year	Aorta
SRS1244781	GSM2036534	EFO:0000246	age	66	66	UO:0000036	year	Aorta
SRS1244782	GSM2036533	EFO:0000246	age	67	67	UO:0000036	year	Aorta
SRS1244783	GSM2036532	EFO:0000246	age	56	56	UO:0000036	year	Aorta
SRS1244784	GSM2036531	EFO:0000246	age	60	60	UO:0000036	year	Aorta
SRS1244786	GSM2036529	EFO:0000246	age	58	58	UO:0000036	year	Aorta
SRS1244789	GSM2036526	EFO:0000246	age	60	60	UO:0000036	year	Aorta
SRS1244790	GSM2036525	EFO:0000246	age	64	64	UO:0000036	year	Aorta
SRS1244791	GSM2036524	EFO:0000246	age	71	71	UO:0000036	year	Aorta
SRS1244792	GSM2036523	EFO:0000246	age	68	68	UO:0000036	year	Aorta
SRS1249603	GSM2040744	EFO:0000246	age	57	57	UO:0000036	year	Lymphoblast
SRS1249604	GSM2040743	EFO:0000246	age	34	34	UO:0000036	year	Lymphoblast
SRS1249614	GSM2040733	EFO:0000246	age	38	38	UO:0000036	year	Lymphoblast
SRS1249615	GSM2040732	EFO:0000246	age	41	41	UO:0000036	year	Lymphoblast
SRS1365668	GSM2100634	EFO:0000246	age	59	59	UO:0000036	year	Brain
SRS1365669	GSM2100633	EFO:0000246	age	64	64	UO:0000036	year	Brain
SRS1365670	GSM2100632	EFO:0000246	age	57	57	UO:0000036	year	Brain
SRS1365671	GSM2100631	EFO:0000246	age	48	48	UO:0000036	year	Brain
SRS1365672	GSM2100630	EFO:0000246	age	50	50	UO:0000036	year	Brain
SRS1365673	GSM2100629	EFO:0000246	age	42	42	UO:0000036	year	Brain
SRS1365674	GSM2100628	EFO:0000246	age	46	46	UO:0000036	year	Brain
SRS1436874	GSM2152526	EFO:0000246	age	54	54	UO:0000036	year	Epithelial Cell
SRS1436875	GSM2152528	EFO:0000246	age	54	54	UO:0000036	year	Epithelial Cell
SRS1436876	GSM2152527	EFO:0000246	age	54	54	UO:0000036	year	Epithelial Cell
SRS1436877	GSM2152529	EFO:0000246	age	54	54	UO:0000036	year	Epithelial Cell
SRS1436878	GSM2152530	EFO:0000246	age	54	54	UO:0000036	year	Epithelial Cell
SRS1436880	GSM2152531	EFO:0000246	age	54	54	UO:0000036	year	Epithelial Cell
SRS1610552	GSM2268318	EFO:0000246	age	62	62Y	UO:0000036	year	Keratinocyte
SRS1610553	GSM2268319	EFO:0000246	age	62	62Y	UO:0000036	year	Keratinocyte
SRS1629793	GSM2285743	EFO:0000246	age	56	56	UO:0000036	year	Skin
SRS1629795	GSM2285741	EFO:0000246	age	26	26	UO:0000036	year	Skin
SRS1629796	GSM2285745	EFO:0000246	age	22	22	UO:0000036	year	Skin
SRS1629797	GSM2285744	EFO:0000246	age	65	65	UO:0000036	year	Skin
SRS1629799	GSM2285747	EFO:0000246	age	27	27	UO:0000036	year	Skin
SRS1629800	GSM2285748	EFO:0000246	age	68	68	UO:0000036	year	Skin
SRS1629801	GSM2285749	EFO:0000246	age	48	48	UO:0000036	year	Skin
SRS1629802	GSM2285750	EFO:0000246	age	81	81	UO:0000036	year	Skin
SRS1629803	GSM2285751	EFO:0000246	age	72	72	UO:0000036	year	Skin
SRS1629804	GSM2285752	EFO:0000246	age	22	22	UO:0000036	year	Skin
SRS1629805	GSM2285753	EFO:0000246	age	83	83	UO:0000036	year	Skin
SRS1629806	GSM2285754	EFO:0000246	age	86	86	UO:0000036	year	Skin
SRS1629807	GSM2285755	EFO:0000246	age	72	72	UO:0000036	year	Skin
SRS1629808	GSM2285756	EFO:0000246	age	53	53	UO:0000036	year	Skin
SRS1629810	GSM2285758	EFO:0000246	age	47	47	UO:0000036	year	Skin
SRS1629811	GSM2285759	EFO:0000246	age	67	67	UO:0000036	year	Skin
SRS1629812	GSM2285760	EFO:0000246	age	75	75	UO:0000036	year	Skin
SRS1629813	GSM2285761	EFO:0000246	age	83	83	UO:0000036	year	Skin
SRS1629814	GSM2285763	EFO:0000246	age	72	72	UO:0000036	year	Skin
SRS1629815	GSM2285762	EFO:0000246	age	83	83	UO:0000036	year	Skin
SRS1629816	GSM2285764	EFO:0000246	age	26	26	UO:0000036	year	Skin
SRS1629817	GSM2285765	EFO:0000246	age	61	61	UO:0000036	year	Skin
SRS1629818	GSM2285766	EFO:0000246	age	63	63	UO:0000036	year	Skin
SRS1629819	GSM2285767	EFO:0000246	age	72	72	UO:0000036	year	Skin
SRS1629820	GSM2285768	EFO:0000246	age	65	65	UO:0000036	year	Skin
SRS1629821	GSM2285769	EFO:0000246	age	21	21	UO:0000036	year	Skin
SRS1629822	GSM2285770	EFO:0000246	age	23	23	UO:0000036	year	Skin
SRS1629823	GSM2285771	EFO:0000246	age	24	24	UO:0000036	year	Skin
SRS1629824	GSM2285772	EFO:0000246	age	22	22	UO:0000036	year	Skin
SRS1629827	GSM2285775	EFO:0000246	age	63	63	UO:0000036	year	Skin
SRS1629831	GSM2285779	EFO:0000246	age	22	22	UO:0000036	year	Skin
SRS1629833	GSM2285780	EFO:0000246	age	60	60	UO:0000036	year	Skin
SRS1629834	GSM2285782	EFO:0000246	age	27	27	UO:0000036	year	Skin
SRS1629835	GSM2285783	EFO:0000246	age	23	23	UO:0000036	year	Skin
SRS1629836	GSM2285784	EFO:0000246	age	44	44	UO:0000036	year	Skin
SRS1629837	GSM2285785	EFO:0000246	age	65	65	UO:0000036	year	Skin
SRS1629839	GSM2285787	EFO:0000246	age	48	48	UO:0000036	year	Skin
SRS1629841	GSM2285790	EFO:0000246	age	58	58	UO:0000036	year	Skin
SRS1629846	GSM2285794	EFO:0000246	age	53	53	UO:0000036	year	Skin
SRS1629847	GSM2285795	EFO:0000246	age	61	61	UO:0000036	year	Skin
SRS1629853	GSM2285801	EFO:0000246	age	46	46	UO:0000036	year	Skin
SRS1629854	GSM2285802	EFO:0000246	age	87	87	UO:0000036	year	Skin
SRS1629858	GSM2285806	EFO:0000246	age	82	82	UO:0000036	year	Skin
SRS1629861	GSM2285809	EFO:0000246	age	72	72	UO:0000036	year	Skin
SRS1629863	GSM2285811	EFO:0000246	age	76	76	UO:0000036	year	Skin
SRS1629864	GSM2285812	EFO:0000246	age	77	77	UO:0000036	year	Skin
SRS1629866	GSM2285813	EFO:0000246	age	49	49	UO:0000036	year	Skin
SRS1629869	GSM2285818	EFO:0000246	age	68	68	UO:0000036	year	Skin
SRS1629873	GSM2285821	EFO:0000246	age	67	67	UO:0000036	year	Skin
SRS1659585	GSM2298984	EFO:0000246	age	58	58	UO:0000036	year	Fibroblast
SRS1659586	GSM2298985	EFO:0000246	age	27	27	UO:0000036	year	Fibroblast
SRS1659587	GSM2298986	EFO:0000246	age	25	25	UO:0000036	year	Fibroblast
SRS1659588	GSM2298987	EFO:0000246	age	59	59	UO:0000036	year	Fibroblast
SRS1659589	GSM2298988	EFO:0000246	age	53	53	UO:0000036	year	Fibroblast
SRS1659590	GSM2298989	EFO:0000246	age	64	64	UO:0000036	year	Fibroblast
SRS1659591	GSM2298990	EFO:0000246	age	25	25	UO:0000036	year	Fibroblast
SRS1659593	GSM2298991	EFO:0000246	age	32	32	UO:0000036	year	Fibroblast
SRS1659594	GSM2298992	EFO:0000246	age	34	34	UO:0000036	year	Fibroblast
SRS1659597	GSM2298995	EFO:0000246	age	43	43	UO:0000036	year	Adipose Stem Cell
SRS1659598	GSM2298996	EFO:0000246	age	42	42	UO:0000036	year	Adipose Stem Cell
SRS1659599	GSM2298997	EFO:0000246	age	44	44	UO:0000036	year	Adipose Stem Cell
SRS1659600	GSM2298998	EFO:0000246	age	47	47	UO:0000036	year	Adipose Stem Cell
SRS1659601	GSM2298999	EFO:0000246	age	39	39	UO:0000036	year	Adipose Stem Cell
SRS1659602	GSM2299000	EFO:0000246	age	61	61	UO:0000036	year	Adipose Stem Cell
SRS1659603	GSM2299001	EFO:0000246	age	63	63	UO:0000036	year	Adipose Stem Cell
SRS1659604	GSM2299002	EFO:0000246	age	64	64	UO:0000036	year	Adipose Stem Cell
SRS1659605	GSM2299004	EFO:0000246	age	41	41	UO:0000036	year	Adipose Stem Cell
SRS1659606	GSM2299005	EFO:0000246	age	49	49	UO:0000036	year	Adipose Stem Cell
SRS1659607	GSM2299003	EFO:0000246	age	48	48	UO:0000036	year	Adipose Stem Cell
SRS1659608	GSM2299006	EFO:0000246	age	34	34	UO:0000036	year	Adipose Stem Cell
SRS1659609	GSM2299008	EFO:0000246	age	42	42	UO:0000036	year	Adipose Stem Cell
SRS1659610	GSM2299009	EFO:0000246	age	33	33	UO:0000036	year	Adipose Stem Cell
SRS1659611	GSM2299011	EFO:0000246	age	35	35	UO:0000036	year	Adipose Stem Cell
SRS1659612	GSM2299010	EFO:0000246	age	50	50	UO:0000036	year	Adipose Stem Cell
SRS1659613	GSM2299007	EFO:0000246	age	24	24	UO:0000036	year	Adipose Stem Cell
SRS1659614	GSM2299012	EFO:0000246	age	37	37	UO:0000036	year	Adipose Stem Cell
SRS1659615	GSM2299013	EFO:0000246	age	39	39	UO:0000036	year	Adipose Stem Cell
SRS1659616	GSM2299015	EFO:0000246	age	64	64	UO:0000036	year	Adipose Stem Cell
SRS1659617	GSM2299014	EFO:0000246	age	30	30	UO:0000036	year	Adipose Stem Cell
SRS1659618	GSM2299016	EFO:0000246	age	27	27	UO:0000036	year	Adipose Stem Cell
SRS1659619	GSM2299018	EFO:0000246	age	40	40	UO:0000036	year	Adipose Stem Cell
SRS1659620	GSM2299019	EFO:0000246	age	33	33	UO:0000036	year	Adipose Stem Cell
SRS1659621	GSM2299021	EFO:0000246	age	52	52	UO:0000036	year	Adipose Stem Cell
SRS1659622	GSM2299017	EFO:0000246	age	50	50	UO:0000036	year	Adipose Stem Cell
SRS1659623	GSM2299023	EFO:0000246	age	53	53	UO:0000036	year	Adipose Stem Cell
SRS1659624	GSM2299022	EFO:0000246	age	55	55	UO:0000036	year	Adipose Stem Cell
SRS1659629	GSM2299020	EFO:0000246	age	53	53	UO:0000036	year	Adipose Stem Cell
SRS1690385	GSM2309851	EFO:0000246	age	40.87	40.87	UO:0000036	year	Blood
SRS1690387	GSM2309852	EFO:0000246	age	40.87	40.87	UO:0000036	year	Blood
SRS1690424	GSM2309891	EFO:0000246	age	34.68	34.68	UO:0000036	year	Blood
SRS1690426	GSM2309894	EFO:0000246	age	34.68	34.68	UO:0000036	year	Blood
SRS1690427	GSM2309892	EFO:0000246	age	34.68	34.68	UO:0000036	year	Blood
SRS1690428	GSM2309893	EFO:0000246	age	34.68	34.68	UO:0000036	year	Blood
SRS1772966	GSM2370973	EFO:0000246	age	47	47	UO:0000036	year	Synovial Cell
SRS1772967	GSM2370972	EFO:0000246	age	22	22	UO:0000036	year	Synovial Cell
SRS1772968	GSM2370974	EFO:0000246	age	27	27	UO:0000036	year	Synovial Cell
SRS1772969	GSM2370975	EFO:0000246	age	47	47	UO:0000036	year	Synovial Cell
SRS1772970	GSM2370976	EFO:0000246	age	32	32	UO:0000036	year	Synovial Cell
SRS1772971	GSM2370971	EFO:0000246	age	32	32	UO:0000036	year	Synovial Cell
SRS1772972	GSM2370977	EFO:0000246	age	31	31	UO:0000036	year	Synovial Cell
SRS1772974	GSM2370980	EFO:0000246	age	28	28	UO:0000036	year	Synovial Cell
SRS1772975	GSM2370979	EFO:0000246	age	66	66	UO:0000036	year	Synovial Cell
SRS1772976	GSM2370981	EFO:0000246	age	63	63	UO:0000036	year	Synovial Cell
SRS1772978	GSM2370983	EFO:0000246	age	55	55	UO:0000036	year	Synovial Cell
SRS1772981	GSM2370987	EFO:0000246	age	73	73	UO:0000036	year	Synovial Cell
SRS1772982	GSM2370988	EFO:0000246	age	20	20	UO:0000036	year	Synovial Cell
SRS1772985	GSM2370990	EFO:0000246	age	33	33	UO:0000036	year	Synovial Cell
SRS1772986	GSM2370991	EFO:0000246	age	20	20	UO:0000036	year	Synovial Cell
SRS1772987	GSM2370992	EFO:0000246	age	52	52	UO:0000036	year	Synovial Cell
SRS1772988	GSM2370993	EFO:0000246	age	24	24	UO:0000036	year	Synovial Cell
SRS1772989	GSM2370994	EFO:0000246	age	28	28	UO:0000036	year	Synovial Cell
SRS1772990	GSM2370995	EFO:0000246	age	29	29	UO:0000036	year	Synovial Cell
SRS1772991	GSM2370996	EFO:0000246	age	23	23	UO:0000036	year	Synovial Cell
SRS1772992	GSM2370997	EFO:0000246	age	29	29	UO:0000036	year	Synovial Cell
SRS1915561	GSM2454165	EFO:0000246	age	57	57	UO:0000036	year	Epithelial Cell
SRS1915562	GSM2454166	EFO:0000246	age	57	57	UO:0000036	year	Epithelial Cell
SRS1915567	GSM2454171	EFO:0000246	age	57	57	UO:0000036	year	Epithelial Cell
SRS1915572	GSM2454176	EFO:0000246	age	75	75	UO:0000036	year	Epithelial Cell
SRS1915573	GSM2454177	EFO:0000246	age	75	75	UO:0000036	year	Epithelial Cell
SRS1915578	GSM2454182	EFO:0000246	age	75	75	UO:0000036	year	Epithelial Cell
SRS1915583	GSM2454187	EFO:0000246	age	69	69	UO:0000036	year	Epithelial Cell
SRS1915584	GSM2454188	EFO:0000246	age	69	69	UO:0000036	year	Epithelial Cell
SRS1915589	GSM2454193	EFO:0000246	age	69	69	UO:0000036	year	Epithelial Cell
SRS1915594	GSM2454198	EFO:0000246	age	42	42	UO:0000036	year	Epithelial Cell
SRS1915595	GSM2454199	EFO:0000246	age	42	42	UO:0000036	year	Epithelial Cell
SRS1915600	GSM2454204	EFO:0000246	age	42	42	UO:0000036	year	Epithelial Cell
SRS1955479	GSM2475285	EFO:0000246	age	79	79	UO:0000036	year	Retina
SRS1955480	GSM2475287	EFO:0000246	age	79	79	UO:0000036	year	Retina
SRS1955481	GSM2475286	EFO:0000246	age	79	79	UO:0000036	year	Epithelial Cell
SRS1955482	GSM2475288	EFO:0000246	age	79	79	UO:0000036	year	Epithelial Cell
SRS1955483	GSM2475289	EFO:0000246	age	62	62	UO:0000036	year	Retina
SRS1955484	GSM2475291	EFO:0000246	age	62	62	UO:0000036	year	Retina
SRS1955485	GSM2475290	EFO:0000246	age	62	62	UO:0000036	year	Epithelial Cell
SRS1955486	GSM2475292	EFO:0000246	age	62	62	UO:0000036	year	Epithelial Cell
SRS1955487	GSM2475293	EFO:0000246	age	63	63	UO:0000036	year	Retina
SRS1955488	GSM2475295	EFO:0000246	age	63	63	UO:0000036	year	Retina
SRS1955489	GSM2475294	EFO:0000246	age	63	63	UO:0000036	year	Epithelial Cell
SRS1955490	GSM2475296	EFO:0000246	age	63	63	UO:0000036	year	Epithelial Cell
SRS1955491	GSM2475297	EFO:0000246	age	62	62	UO:0000036	year	Retina
SRS1955492	GSM2475298	EFO:0000246	age	62	62	UO:0000036	year	Epithelial Cell
SRS1955493	GSM2475299	EFO:0000246	age	62	62	UO:0000036	year	Retina
SRS1955494	GSM2475300	EFO:0000246	age	62	62	UO:0000036	year	Epithelial Cell
SRS1955495	GSM2475301	EFO:0000246	age	88	88	UO:0000036	year	Retina
SRS1955496	GSM2475302	EFO:0000246	age	88	88	UO:0000036	year	Epithelial Cell
SRS1955497	GSM2475303	EFO:0000246	age	88	88	UO:0000036	year	Retina
SRS1955498	GSM2475304	EFO:0000246	age	88	88	UO:0000036	year	Epithelial Cell
SRS1955499	GSM2475305	EFO:0000246	age	95	95	UO:0000036	year	Retina
SRS1955500	GSM2475306	EFO:0000246	age	95	95	UO:0000036	year	Epithelial Cell
SRS1955501	GSM2475307	EFO:0000246	age	95	95	UO:0000036	year	Retina
SRS1955502	GSM2475308	EFO:0000246	age	95	95	UO:0000036	year	Epithelial Cell
SRS1955503	GSM2475309	EFO:0000246	age	72	72	UO:0000036	year	Retina
SRS1955504	GSM2475310	EFO:0000246	age	72	72	UO:0000036	year	Epithelial Cell
SRS1955505	GSM2475311	EFO:0000246	age	72	72	UO:0000036	year	Retina
SRS1955506	GSM2475312	EFO:0000246	age	72	72	UO:0000036	year	Epithelial Cell
SRS1955507	GSM2475313	EFO:0000246	age	70	70	UO:0000036	year	Retina
SRS1955508	GSM2475314	EFO:0000246	age	70	70	UO:0000036	year	Epithelial Cell
SRS1955509	GSM2475315	EFO:0000246	age	70	70	UO:0000036	year	Retina
SRS1955510	GSM2475316	EFO:0000246	age	70	70	UO:0000036	year	Epithelial Cell
SRS2341004	GSM2695931	EFO:0000246	age	67	67	UO:0000036	year	Bone
SRS2341005	GSM2695930	EFO:0000246	age	67	67	UO:0000036	year	Bone Marrow
SRS2341006	GSM2695932	EFO:0000246	age	57	57	UO:0000036	year	Bone Marrow
SRS2341007	GSM2695933	EFO:0000246	age	57	57	UO:0000036	year	Bone
SRS2341008	GSM2695934	EFO:0000246	age	53	53	UO:0000036	year	Bone Marrow
SRS2341009	GSM2695936	EFO:0000246	age	34	34	UO:0000036	year	Bone
SRS2341010	GSM2695935	EFO:0000246	age	53	53	UO:0000036	year	Bone
SRS2341011	GSM2695938	EFO:0000246	age	35	35	UO:0000036	year	Bone
SRS2341012	GSM2695937	EFO:0000246	age	34	34	UO:0000036	year	Bone Marrow
SRS2341013	GSM2695939	EFO:0000246	age	35	35	UO:0000036	year	Bone Marrow
SRS2373819	GSM2713942	EFO:0000246	age	25	25	UO:0000036	year	Epithelial Cell
SRS2373824	GSM2713947	EFO:0000246	age	35	35	UO:0000036	year	Epithelial Cell
SRS2373828	GSM2713951	EFO:0000246	age	37	37	UO:0000036	year	Epithelial Cell
SRS2373832	GSM2713955	EFO:0000246	age	41	41	UO:0000036	year	Epithelial Cell
SRS2373837	GSM2713960	EFO:0000246	age	29	29	UO:0000036	year	Epithelial Cell
SRS2373840	GSM2713963	EFO:0000246	age	36	36	UO:0000036	year	Epithelial Cell
SRS2373842	GSM2713965	EFO:0000246	age	23	23	UO:0000036	year	Epithelial Cell
SRS2373846	GSM2713968	EFO:0000246	age	25	25	UO:0000036	year	Epithelial Cell
SRS2373850	GSM2713972	EFO:0000246	age	24	24	UO:0000036	year	Epithelial Cell
SRS2373851	GSM2713973	EFO:0000246	age	35	35	UO:0000036	year	Epithelial Cell
SRS2373855	GSM2713977	EFO:0000246	age	37	37	UO:0000036	year	Epithelial Cell
SRS2373859	GSM2713981	EFO:0000246	age	41	41	UO:0000036	year	Epithelial Cell
SRS2373864	GSM2713987	EFO:0000246	age	25	25	UO:0000036	year	Epithelial Cell
SRS2373865	GSM2713986	EFO:0000246	age	29	29	UO:0000036	year	Epithelial Cell
SRS2373869	GSM2713991	EFO:0000246	age	23	23	UO:0000036	year	Epithelial Cell
SRS2393801	GSM2722229	EFO:0000246	age	22	22Y	UO:0000036	year	Fibroblast
SRS2393802	GSM2722230	EFO:0000246	age	22	22Y	UO:0000036	year	Fibroblast
SRS2432123	GSM2742710	EFO:0000246	age	51	51	UO:0000036	year	Fibroblast
SRS2432124	GSM2742711	EFO:0000246	age	51	51	UO:0000036	year	Fibroblast
SRS2432125	GSM2742709	EFO:0000246	age	51	51	UO:0000036	year	Fibroblast
SRS2432126	GSM2742712	EFO:0000246	age	51	51	UO:0000036	year	Fibroblast
SRS2434543	GSM2745899	EFO:0000246	age	36.48	36.48	UO:0000036	year	Brain
SRS2434544	GSM2745900	EFO:0000246	age	68.54	68.54	UO:0000036	year	Brain
SRS2434546	GSM2745902	EFO:0000246	age	28.35	28.35	UO:0000036	year	Brain
SRS2434547	GSM2745903	EFO:0000246	age	38.39	38.39	UO:0000036	year	Brain
SRS2434548	GSM2745904	EFO:0000246	age	64.52	64.52	UO:0000036	year	Brain
SRS2434549	GSM2745905	EFO:0000246	age	30.02	30.02	UO:0000036	year	Brain
SRS2434550	GSM2745906	EFO:0000246	age	46.57	46.57	UO:0000036	year	Brain
SRS2434551	GSM2745907	EFO:0000246	age	20.85	20.85	UO:0000036	year	Brain
SRS2434552	GSM2745908	EFO:0000246	age	46.08	46.08	UO:0000036	year	Brain
SRS2434558	GSM2745914	EFO:0000246	age	65.58	65.58	UO:0000036	year	Brain
SRS2434559	GSM2745915	EFO:0000246	age	23.22	23.22	UO:0000036	year	Brain
SRS2434560	GSM2745916	EFO:0000246	age	22576935	22576935	UO:0000036	year	Brain
SRS2434561	GSM2745917	EFO:0000246	age	2748056	2748056	UO:0000036	year	Brain
SRS2434566	GSM2745922	EFO:0000246	age	26727631	26727631	UO:0000036	year	Brain
SRS2434574	GSM2745930	EFO:0000246	age	22158033	22158033	UO:0000036	year	Brain
SRS2434577	GSM2745933	EFO:0000246	age	22711094	22711094	UO:0000036	year	Brain
SRS2434579	GSM2745935	EFO:0000246	age	45947869	45947869	UO:0000036	year	Brain
SRS2454749	GSM2740605	EFO:0000246	age	47	47	UO:0000036	year	Brain
SRS2454750	GSM2740606	EFO:0000246	age	41	41	UO:0000036	year	Brain
SRS2454751	GSM2740607	EFO:0000246	age	31	31	UO:0000036	year	Brain
SRS2454753	GSM2740609	EFO:0000246	age	46	46	UO:0000036	year	Brain
SRS2454754	GSM2740610	EFO:0000246	age	40	40	UO:0000036	year	Brain
SRS2454756	GSM2740612	EFO:0000246	age	33	33	UO:0000036	year	Brain
SRS2454757	GSM2740613	EFO:0000246	age	38	38	UO:0000036	year	Brain
SRS2454761	GSM2740616	EFO:0000246	age	55	55	UO:0000036	year	Brain
SRS2454767	GSM2740623	EFO:0000246	age	44	44	UO:0000036	year	Brain
SRS2454777	GSM2740637	EFO:0000246	age	46	46	UO:0000036	year	Brain
SRS2454779	GSM2740639	EFO:0000246	age	52	52	UO:0000036	year	Brain
SRS2454781	GSM2740641	EFO:0000246	age	79	79	UO:0000036	year	Brain
SRS2454783	GSM2740643	EFO:0000246	age	72	72	UO:0000036	year	Brain
SRS2454785	GSM2740645	EFO:0000246	age	29	29	UO:0000036	year	Brain
SRS2454786	GSM2740646	EFO:0000246	age	45	45	UO:0000036	year	Brain
SRS2454787	GSM2740648	EFO:0000246	age	82	82	UO:0000036	year	Brain
SRS2454791	GSM2740651	EFO:0000246	age	60	60	UO:0000036	year	Brain
SRS2454792	GSM2740652	EFO:0000246	age	22	22	UO:0000036	year	Brain
SRS2454793	GSM2740653	EFO:0000246	age	68	68	UO:0000036	year	Brain
SRS2454795	GSM2740655	EFO:0000246	age	59	59	UO:0000036	year	Brain
SRS2454796	GSM2740656	EFO:0000246	age	51	51	UO:0000036	year	Brain
SRS2454797	GSM2740657	EFO:0000246	age	47	47	UO:0000036	year	Brain
SRS2454798	GSM2740658	EFO:0000246	age	41	41	UO:0000036	year	Brain
SRS2454799	GSM2740659	EFO:0000246	age	31	31	UO:0000036	year	Brain
SRS2454801	GSM2740661	EFO:0000246	age	46	46	UO:0000036	year	Brain
SRS2454802	GSM2740662	EFO:0000246	age	40	40	UO:0000036	year	Brain
SRS2454804	GSM2740664	EFO:0000246	age	33	33	UO:0000036	year	Brain
SRS2454805	GSM2740665	EFO:0000246	age	38	38	UO:0000036	year	Brain
SRS2454808	GSM2740668	EFO:0000246	age	55	55	UO:0000036	year	Brain
SRS2454815	GSM2740675	EFO:0000246	age	44	44	UO:0000036	year	Brain
SRS2454825	GSM2740685	EFO:0000246	age	46	46	UO:0000036	year	Brain
SRS2454827	GSM2740687	EFO:0000246	age	52	52	UO:0000036	year	Brain
SRS2454829	GSM2740689	EFO:0000246	age	79	79	UO:0000036	year	Brain
SRS2454831	GSM2740691	EFO:0000246	age	72	72	UO:0000036	year	Brain
SRS2454833	GSM2740693	EFO:0000246	age	29	29	UO:0000036	year	Brain
SRS2454834	GSM2740694	EFO:0000246	age	45	45	UO:0000036	year	Brain
SRS2454836	GSM2740696	EFO:0000246	age	82	82	UO:0000036	year	Brain
SRS2454839	GSM2740699	EFO:0000246	age	60	60	UO:0000036	year	Brain
SRS2454840	GSM2740700	EFO:0000246	age	22	22	UO:0000036	year	Brain
SRS2454841	GSM2740701	EFO:0000246	age	68	68	UO:0000036	year	Brain
SRS2454843	GSM2740703	EFO:0000246	age	59	59	UO:0000036	year	Brain
SRS2454844	GSM2740705	EFO:0000246	age	47	47	UO:0000036	year	Brain
SRS2454845	GSM2740704	EFO:0000246	age	51	51	UO:0000036	year	Brain
SRS2454846	GSM2740706	EFO:0000246	age	41	41	UO:0000036	year	Brain
SRS2454847	GSM2740707	EFO:0000246	age	31	31	UO:0000036	year	Brain
SRS2454873	GSM2740733	EFO:0000246	age	46	46	UO:0000036	year	Brain
SRS2454875	GSM2740735	EFO:0000246	age	52	52	UO:0000036	year	Brain
SRS2454877	GSM2740737	EFO:0000246	age	72	72	UO:0000036	year	Brain
SRS2454879	GSM2740739	EFO:0000246	age	29	29	UO:0000036	year	Brain
SRS2454881	GSM2740740	EFO:0000246	age	45	45	UO:0000036	year	Brain
SRS2454882	GSM2740742	EFO:0000246	age	82	82	UO:0000036	year	Brain
SRS2454885	GSM2740745	EFO:0000246	age	60	60	UO:0000036	year	Brain
SRS2454886	GSM2740746	EFO:0000246	age	22	22	UO:0000036	year	Brain
SRS2454887	GSM2740747	EFO:0000246	age	68	68	UO:0000036	year	Brain
SRS2454889	GSM2740749	EFO:0000246	age	59	59	UO:0000036	year	Brain
SRS2454890	GSM2740750	EFO:0000246	age	51	51	UO:0000036	year	Brain
SRS2454891	GSM2740751	EFO:0000246	age	47	47	UO:0000036	year	Brain
SRS2454892	GSM2740753	EFO:0000246	age	31	31	UO:0000036	year	Brain
SRS2454893	GSM2740752	EFO:0000246	age	41	41	UO:0000036	year	Brain
SRS2454895	GSM2740755	EFO:0000246	age	46	46	UO:0000036	year	Brain
SRS2454897	GSM2740756	EFO:0000246	age	40	40	UO:0000036	year	Brain
SRS2454898	GSM2740758	EFO:0000246	age	33	33	UO:0000036	year	Brain
SRS2454899	GSM2740759	EFO:0000246	age	38	38	UO:0000036	year	Brain
SRS2454902	GSM2740762	EFO:0000246	age	55	55	UO:0000036	year	Brain
SRS2454909	GSM2740769	EFO:0000246	age	44	44	UO:0000036	year	Brain
SRS2454919	GSM2740779	EFO:0000246	age	46	46	UO:0000036	year	Brain
SRS2454925	GSM2740785	EFO:0000246	age	72	72	UO:0000036	year	Brain
SRS2454927	GSM2740787	EFO:0000246	age	29	29	UO:0000036	year	Brain
SRS2454928	GSM2740788	EFO:0000246	age	45	45	UO:0000036	year	Brain
SRS2454930	GSM2740790	EFO:0000246	age	82	82	UO:0000036	year	Brain
SRS2454933	GSM2740793	EFO:0000246	age	60	60	UO:0000036	year	Brain
SRS2454934	GSM2740794	EFO:0000246	age	22	22	UO:0000036	year	Brain
SRS2454935	GSM2740795	EFO:0000246	age	68	68	UO:0000036	year	Brain
SRS2454937	GSM2740797	EFO:0000246	age	59	59	UO:0000036	year	Brain
SRS2454938	GSM2740798	EFO:0000246	age	51	51	UO:0000036	year	Brain
SRS2454939	GSM2740799	EFO:0000246	age	47	47	UO:0000036	year	Brain
SRS2454940	GSM2740800	EFO:0000246	age	41	41	UO:0000036	year	Brain
SRS2454941	GSM2740801	EFO:0000246	age	31	31	UO:0000036	year	Brain
SRS2454943	GSM2740803	EFO:0000246	age	46	46	UO:0000036	year	Brain
SRS2454944	GSM2740804	EFO:0000246	age	40	40	UO:0000036	year	Brain
SRS2454946	GSM2740806	EFO:0000246	age	33	33	UO:0000036	year	Brain
SRS2454947	GSM2740807	EFO:0000246	age	38	38	UO:0000036	year	Brain
SRS2454950	GSM2740810	EFO:0000246	age	55	55	UO:0000036	year	Brain
SRS2454957	GSM2740817	EFO:0000246	age	44	44	UO:0000036	year	Brain
SRS2454967	GSM2740827	EFO:0000246	age	46	46	UO:0000036	year	Brain
SRS2454968	GSM2740829	EFO:0000246	age	52	52	UO:0000036	year	Brain
SRS2454971	GSM2740831	EFO:0000246	age	79	79	UO:0000036	year	Brain
SRS2454973	GSM2740833	EFO:0000246	age	72	72	UO:0000036	year	Brain
SRS2454975	GSM2740835	EFO:0000246	age	29	29	UO:0000036	year	Brain
SRS2454976	GSM2740836	EFO:0000246	age	45	45	UO:0000036	year	Brain
SRS2454978	GSM2740838	EFO:0000246	age	82	82	UO:0000036	year	Brain
SRS2454981	GSM2740841	EFO:0000246	age	60	60	UO:0000036	year	Brain
SRS2454982	GSM2740842	EFO:0000246	age	22	22	UO:0000036	year	Brain
SRS2454983	GSM2740843	EFO:0000246	age	68	68	UO:0000036	year	Brain
SRS2454985	GSM2740845	EFO:0000246	age	59	59	UO:0000036	year	Brain
SRS2454986	GSM2740847	EFO:0000246	age	47	47	UO:0000036	year	Brain
SRS2454987	GSM2740846	EFO:0000246	age	51	51	UO:0000036	year	Brain
SRS2454988	GSM2740848	EFO:0000246	age	41	41	UO:0000036	year	Brain
SRS2454989	GSM2740849	EFO:0000246	age	31	31	UO:0000036	year	Brain
SRS2454991	GSM2740851	EFO:0000246	age	40	40	UO:0000036	year	Brain
SRS2454992	GSM2740854	EFO:0000246	age	38	38	UO:0000036	year	Brain
SRS2454994	GSM2740853	EFO:0000246	age	33	33	UO:0000036	year	Brain
SRS2454998	GSM2740857	EFO:0000246	age	55	55	UO:0000036	year	Brain
SRS2455002	GSM2740862	EFO:0000246	age	44	44	UO:0000036	year	Brain
SRS2455011	GSM2740872	EFO:0000246	age	46	46	UO:0000036	year	Brain
SRS2455014	GSM2740874	EFO:0000246	age	52	52	UO:0000036	year	Brain
SRS2455018	GSM2740877	EFO:0000246	age	72	72	UO:0000036	year	Brain
SRS2455019	GSM2740879	EFO:0000246	age	29	29	UO:0000036	year	Brain
SRS2455020	GSM2740884	EFO:0000246	age	60	60	UO:0000036	year	Brain
SRS2455023	GSM2740880	EFO:0000246	age	45	45	UO:0000036	year	Brain
SRS2455025	GSM2740885	EFO:0000246	age	22	22	UO:0000036	year	Brain
SRS2455027	GSM2740886	EFO:0000246	age	68	68	UO:0000036	year	Brain
SRS2455028	GSM2740889	EFO:0000246	age	51	51	UO:0000036	year	Brain
SRS2455029	GSM2740888	EFO:0000246	age	59	59	UO:0000036	year	Brain
SRS2542622	GSM2794401	EFO:0000246	age	37	37	UO:0000036	year	Fibroblast
SRS2542624	GSM2794403	EFO:0000246	age	40	40	UO:0000036	year	Fibroblast
SRS2542625	GSM2794404	EFO:0000246	age	52	52	UO:0000036	year	Fibroblast
SRS2542627	GSM2794406	EFO:0000246	age	47	47	UO:0000036	year	Fibroblast
SRS2542628	GSM2794407	EFO:0000246	age	64	64	UO:0000036	year	Fibroblast
SRS2542630	GSM2794410	EFO:0000246	age	27	27	UO:0000036	year	Fibroblast
SRS2542631	GSM2794411	EFO:0000246	age	48	48	UO:0000036	year	Fibroblast
SRS2542634	GSM2794414	EFO:0000246	age	22	22	UO:0000036	year	Fibroblast
SRS2542636	GSM2794416	EFO:0000246	age	35	35	UO:0000036	year	Fibroblast
SRS2542637	GSM2794417	EFO:0000246	age	39	39	UO:0000036	year	Fibroblast
SRS2542658	GSM2794409	EFO:0000246	age	24	24	UO:0000036	year	Fibroblast
SRS2940813	GSM2991651	EFO:0000246	age	26	26	UO:0000036	year	T-cell
SRS2940814	GSM2991653	EFO:0000246	age	50	50	UO:0000036	year	T-cell
SRS2940815	GSM2991652	EFO:0000246	age	35	35	UO:0000036	year	T-cell
SRS2940816	GSM2991654	EFO:0000246	age	70	70	UO:0000036	year	T-cell
SRS2940817	GSM2991655	EFO:0000246	age	26	26	UO:0000036	year	Treg Cell
SRS2940818	GSM2991656	EFO:0000246	age	35	35	UO:0000036	year	Treg Cell
SRS2940819	GSM2991657	EFO:0000246	age	50	50	UO:0000036	year	Treg Cell
SRS2940820	GSM2991658	EFO:0000246	age	70	70	UO:0000036	year	Treg Cell
SRS3109342	GSM3072105	EFO:0000246	age	68	68	UO:0000036	year	Neuron
SRS3109347	GSM3072108	EFO:0000246	age	54	54	UO:0000036	year	Neuron
SRS3109349	GSM3072111	EFO:0000246	age	46	46	UO:0000036	year	Neuron
SRS3109354	GSM3072116	EFO:0000246	age	31	31	UO:0000036	year	Neuron
SRS3109356	GSM3072119	EFO:0000246	age	51	51	UO:0000036	year	Neuron
SRS3109358	GSM3072120	EFO:0000246	age	39	39	UO:0000036	year	Neuron
SRS3109360	GSM3072123	EFO:0000246	age	35	35	UO:0000036	year	Neuron
SRS3109362	GSM3072124	EFO:0000246	age	42	42	UO:0000036	year	Neuron
SRS3109363	GSM3072125	EFO:0000246	age	35	35	UO:0000036	year	Neuron
SRS3109364	GSM3072127	EFO:0000246	age	51	51	UO:0000036	year	Neuron
SRS3109366	GSM3072128	EFO:0000246	age	43	43	UO:0000036	year	Neuron
SRS3109367	GSM3072130	EFO:0000246	age	49	49	UO:0000036	year	Neuron
SRS3109368	GSM3072129	EFO:0000246	age	51	51	UO:0000036	year	Neuron
SRS3109370	GSM3072131	EFO:0000246	age	46	46	UO:0000036	year	Neuron
SRS3109371	GSM3072133	EFO:0000246	age	50	50	UO:0000036	year	Neuron
SRS3109372	GSM3072134	EFO:0000246	age	48	48	UO:0000036	year	Neuron
SRS3241773	GSM3124281	EFO:0000246	age	42	42	UO:0000036	year	Cervix
SRS3241779	GSM3124287	EFO:0000246	age	52	52	UO:0000036	year	Cervix
SRS3666300	GSM3330688	EFO:0000246	age	46	46	UO:0000036	year	Bone Marrow
SRS3666301	GSM3330689	EFO:0000246	age	46	46	UO:0000036	year	Bone Marrow
SRS3666302	GSM3330690	EFO:0000246	age	53	53	UO:0000036	year	Bone Marrow
SRS3801190	GSM3395247	EFO:0000246	age	63	63	UO:0000036	year	Epithelial Cell
SRS3801191	GSM3395248	EFO:0000246	age	63	63	UO:0000036	year	Epithelial Cell
SRS3801195	GSM3395249	EFO:0000246	age	63	63	UO:0000036	year	Epithelial Cell
SRS3818730	GSM3400609	EFO:0000246	age	50	50Y	UO:0000036	year	Mesenchymal Stem Cell
SRS3983916	GSM3447674	EFO:0000246	age	70	70	UO:0000036	year	Colon
SRS3983917	GSM3447673	EFO:0000246	age	54	54	UO:0000036	year	Rectum
SRS3983918	GSM3447675	EFO:0000246	age	49	49	UO:0000036	year	Rectum
SRS400669	GSM1095127	EFO:0000246	age	30.5	30Y6M	UO:0000036	year	Kidney Cell
SRS400670	GSM1095128	EFO:0000246	age	30.5	30Y6M	UO:0000036	year	Kidney Cell
SRS400671	GSM1095129	EFO:0000246	age	30.5	30Y6M	UO:0000036	year	Kidney Cell
SRS400672	GSM1095130	EFO:0000246	age	30.5	30Y6M	UO:0000036	year	Kidney Cell
SRS400673	GSM1095131	EFO:0000246	age	30.5	30Y6M	UO:0000036	year	Kidney Cell
SRS400674	GSM1095132	EFO:0000246	age	30.5	30Y6M	UO:0000036	year	Kidney Cell
SRS4151185	GSM3517148	EFO:0000246	age	36	36	UO:0000036	year	Neuron
SRS4151213	GSM3517175	EFO:0000246	age	36	36	UO:0000036	year	Oligodendrocyte
SRS4151223	GSM3517184	EFO:0000246	age	76	76	UO:0000036	year	Oligodendrocyte
SRS4151227	GSM3517189	EFO:0000246	age	66	66	UO:0000036	year	Oligodendrocyte
SRS4171320	GSM3520175	EFO:0000246	age	42	42	UO:0000036	year	Hepatocyte
SRS4171322	GSM3520177	EFO:0000246	age	48	48	UO:0000036	year	Hepatocyte
SRS4171324	GSM3520179	EFO:0000246	age	30	30	UO:0000036	year	Hepatocyte
SRS4171326	GSM3520181	EFO:0000246	age	51	51	UO:0000036	year	Hepatocyte
SRS4171327	GSM3520182	EFO:0000246	age	41	41	UO:0000036	year	Hepatocyte
SRS4171328	GSM3520183	EFO:0000246	age	72	72	UO:0000036	year	Hepatocyte
SRS4171329	GSM3520184	EFO:0000246	age	34	34	UO:0000036	year	Hepatocyte
SRS4171330	GSM3520185	EFO:0000246	age	64	64	UO:0000036	year	Hepatocyte
SRS4171331	GSM3520186	EFO:0000246	age	69	69	UO:0000036	year	Hepatocyte
SRS4171332	GSM3520188	EFO:0000246	age	59	59	UO:0000036	year	Hepatocyte
SRS4171333	GSM3520187	EFO:0000246	age	43	43	UO:0000036	year	Hepatocyte
SRS4171334	GSM3520189	EFO:0000246	age	59	59	UO:0000036	year	Hepatocyte
SRS4171335	GSM3520190	EFO:0000246	age	52	52	UO:0000036	year	Hepatocyte
SRS4171336	GSM3520191	EFO:0000246	age	48	48	UO:0000036	year	Hepatocyte
SRS4171337	GSM3520192	EFO:0000246	age	23	23	UO:0000036	year	Hepatocyte
SRS4171338	GSM3520193	EFO:0000246	age	44	44	UO:0000036	year	Hepatocyte
SRS4171339	GSM3520194	EFO:0000246	age	41	41	UO:0000036	year	Hepatocyte
SRS4171342	GSM3520197	EFO:0000246	age	55	55	UO:0000036	year	Hepatocyte
SRS4171343	GSM3520198	EFO:0000246	age	48	48	UO:0000036	year	Hepatocyte
SRS4171344	GSM3520199	EFO:0000246	age	50	50	UO:0000036	year	Hepatocyte
SRS4171347	GSM3520202	EFO:0000246	age	48	48	UO:0000036	year	Hepatocyte
SRS4171348	GSM3520203	EFO:0000246	age	33	33	UO:0000036	year	Hepatocyte
SRS4171349	GSM3520204	EFO:0000246	age	59	59	UO:0000036	year	Hepatocyte
SRS4171350	GSM3520205	EFO:0000246	age	47	47	UO:0000036	year	Hepatocyte
SRS4171351	GSM3520206	EFO:0000246	age	45	45	UO:0000036	year	Hepatocyte
SRS4171352	GSM3520207	EFO:0000246	age	41	41	UO:0000036	year	Hepatocyte
SRS4171353	GSM3520208	EFO:0000246	age	32	32	UO:0000036	year	Hepatocyte
SRS4171354	GSM3520209	EFO:0000246	age	48	48	UO:0000036	year	Hepatocyte
SRS4171356	GSM3520211	EFO:0000246	age	62	62	UO:0000036	year	Hepatocyte
SRS4171357	GSM3520212	EFO:0000246	age	52	52	UO:0000036	year	Hepatocyte
SRS4171358	GSM3520213	EFO:0000246	age	55	55	UO:0000036	year	Hepatocyte
SRS4171360	GSM3520215	EFO:0000246	age	59	59	UO:0000036	year	Hepatocyte
SRS4171362	GSM3520217	EFO:0000246	age	57	57	UO:0000036	year	Hepatocyte
SRS4171363	GSM3520218	EFO:0000246	age	40	40	UO:0000036	year	Hepatocyte
SRS4171364	GSM3520220	EFO:0000246	age	39	39	UO:0000036	year	Hepatocyte
SRS4171365	GSM3520219	EFO:0000246	age	67	67	UO:0000036	year	Hepatocyte
SRS4171367	GSM3520222	EFO:0000246	age	29	29	UO:0000036	year	Hepatocyte
SRS4171368	GSM3520223	EFO:0000246	age	58	58	UO:0000036	year	Hepatocyte
SRS4171369	GSM3520224	EFO:0000246	age	51	51	UO:0000036	year	Hepatocyte
SRS4171370	GSM3520225	EFO:0000246	age	28	28	UO:0000036	year	Hepatocyte
SRS4171371	GSM3520226	EFO:0000246	age	43	43	UO:0000036	year	Hepatocyte
SRS4171372	GSM3520227	EFO:0000246	age	36	36	UO:0000036	year	Hepatocyte
SRS4171373	GSM3520228	EFO:0000246	age	53	53	UO:0000036	year	Hepatocyte
SRS4171374	GSM3520229	EFO:0000246	age	29	29	UO:0000036	year	Hepatocyte
SRS4171375	GSM3520230	EFO:0000246	age	27	27	UO:0000036	year	Hepatocyte
SRS4171376	GSM3520231	EFO:0000246	age	66	66	UO:0000036	year	Hepatocyte
SRS4171377	GSM3520232	EFO:0000246	age	63	63	UO:0000036	year	Hepatocyte
SRS4171378	GSM3520233	EFO:0000246	age	42	42	UO:0000036	year	Hepatocyte
SRS4171379	GSM3520234	EFO:0000246	age	47	47	UO:0000036	year	Hepatocyte
SRS4248994	GSM3561356	EFO:0000246	age	27	27	UO:0000036	year	Fibroblast
SRS4248995	GSM3561357	EFO:0000246	age	27	27	UO:0000036	year	Fibroblast
SRS4248996	GSM3561358	EFO:0000246	age	43	43	UO:0000036	year	Fibroblast
SRS4248997	GSM3561359	EFO:0000246	age	43	43	UO:0000036	year	Fibroblast
SRS4255131	GSM3564278	EFO:0000246	age	54	54	UO:0000036	year	Epithelial Cell
SRS4255132	GSM3564279	EFO:0000246	age	54	54	UO:0000036	year	Epithelial Cell
SRS4255133	GSM3564280	EFO:0000246	age	54	54	UO:0000036	year	Epithelial Cell
SRS4308271	GSM3584494	EFO:0000246	age	22	22	UO:0000036	year	Retina
SRS4335056	GSM3592468	EFO:0000246	age	54	54	UO:0000036	year	Epithelial Cell
SRS4335057	GSM3592469	EFO:0000246	age	54	54	UO:0000036	year	Epithelial Cell
SRS4335058	GSM3592470	EFO:0000246	age	54	54	UO:0000036	year	Epithelial Cell
SRS4372199	GSM3610179	EFO:0000246	age	73	73Y	UO:0000036	year	Neuron
SRS4372200	GSM3610180	EFO:0000246	age	73	73Y	UO:0000036	year	Neuron
SRS4372201	GSM3610181	EFO:0000246	age	73	73Y	UO:0000036	year	Neuron
SRS4372203	GSM3610199	EFO:0000246	age	73	73Y	UO:0000036	year	Neuron
SRS4372204	GSM3610200	EFO:0000246	age	73	73Y	UO:0000036	year	Neuron
SRS4372205	GSM3610201	EFO:0000246	age	73	73Y	UO:0000036	year	Neuron
SRS4372277	GSM3610198	EFO:0000246	age	73	73Y	UO:0000036	year	Neuron
SRS4494132	GSM3673208	EFO:0000246	age	24	24	UO:0000036	year	Brain
SRS4494133	GSM3673209	EFO:0000246	age	27	27	UO:0000036	year	Brain
SRS4494135	GSM3673211	EFO:0000246	age	32	32	UO:0000036	year	Brain
SRS4494137	GSM3673213	EFO:0000246	age	24	24	UO:0000036	year	Brain
SRS4494138	GSM3673214	EFO:0000246	age	26	26	UO:0000036	year	Brain
SRS4494139	GSM3673215	EFO:0000246	age	31	31	UO:0000036	year	Brain
SRS4494140	GSM3673216	EFO:0000246	age	24	24	UO:0000036	year	Brain
SRS4494141	GSM3673217	EFO:0000246	age	27	27	UO:0000036	year	Brain
SRS4494143	GSM3673219	EFO:0000246	age	32	32	UO:0000036	year	Brain
SRS4494145	GSM3673221	EFO:0000246	age	24	24	UO:0000036	year	Brain
SRS4494146	GSM3673222	EFO:0000246	age	26	26	UO:0000036	year	Brain
SRS4494147	GSM3673223	EFO:0000246	age	31	31	UO:0000036	year	Brain
SRS452444	GSM1173807	EFO:0000246	age	25241095890411	25Y88D	UO:0000036	year	Brain
SRS452445	GSM1173808	EFO:0000246	age	53	53	UO:0000036	year	Brain
SRS4602292	GSM3714994	EFO:0000246	age	46	46	UO:0000036	year	Blood
SRS4602293	GSM3714995	EFO:0000246	age	45	45	UO:0000036	year	Blood
SRS4602297	GSM3714999	EFO:0000246	age	49	49	UO:0000036	year	Blood
SRS4620639	GSM3721960	EFO:0000246	age	37	37Y	UO:0000036	year	Epithelial Cell
SRS4620640	GSM3721961	EFO:0000246	age	37	37Y	UO:0000036	year	Epithelial Cell
SRS4620641	GSM3721962	EFO:0000246	age	37	37Y	UO:0000036	year	Epithelial Cell
SRS4620654	GSM3721982	EFO:0000246	age	37	37Y	UO:0000036	year	Epithelial Cell
SRS4620655	GSM3721983	EFO:0000246	age	37	37Y	UO:0000036	year	Epithelial Cell
SRS4620656	GSM3721984	EFO:0000246	age	37	37Y	UO:0000036	year	Epithelial Cell
SRS473116	GSM1215102	EFO:0000246	age	40	40	UO:0000036	year	Ovary
SRS473117	GSM1215103	EFO:0000246	age	32	32	UO:0000036	year	Ovary
SRS473118	GSM1215104	EFO:0000246	age	34	34	UO:0000036	year	Ovary
SRS473119	GSM1215105	EFO:0000246	age	28	28	UO:0000036	year	Ovary
SRS473120	GSM1215106	EFO:0000246	age	35	35	UO:0000036	year	Ovary
SRS473863	GSM1216783	EFO:0000246	age	53	53	UO:0000036	year	Islet Cell
SRS473865	GSM1216784	EFO:0000246	age	55	55	UO:0000036	year	Islet Cell
SRS473866	GSM1216785	EFO:0000246	age	52	52	UO:0000036	year	Islet Cell
SRS473867	GSM1216753	EFO:0000246	age	69	69	UO:0000036	year	Islet Cell
SRS473868	GSM1216754	EFO:0000246	age	56	56	UO:0000036	year	Islet Cell
SRS473869	GSM1216755	EFO:0000246	age	46	46	UO:0000036	year	Islet Cell
SRS473870	GSM1216756	EFO:0000246	age	62	62	UO:0000036	year	Islet Cell
SRS473871	GSM1216757	EFO:0000246	age	70	70	UO:0000036	year	Islet Cell
SRS473872	GSM1216758	EFO:0000246	age	68	68	UO:0000036	year	Islet Cell
SRS473873	GSM1216759	EFO:0000246	age	63	63	UO:0000036	year	Islet Cell
SRS473874	GSM1216760	EFO:0000246	age	52	52	UO:0000036	year	Islet Cell
SRS473875	GSM1216762	EFO:0000246	age	61	61	UO:0000036	year	Islet Cell
SRS473876	GSM1216761	EFO:0000246	age	55	55	UO:0000036	year	Islet Cell
SRS473878	GSM1216764	EFO:0000246	age	65	65	UO:0000036	year	Islet Cell
SRS473879	GSM1216765	EFO:0000246	age	74	74	UO:0000036	year	Islet Cell
SRS473880	GSM1216766	EFO:0000246	age	55	55	UO:0000036	year	Islet Cell
SRS473881	GSM1216767	EFO:0000246	age	32	32	UO:0000036	year	Islet Cell
SRS473882	GSM1216768	EFO:0000246	age	62	62	UO:0000036	year	Islet Cell
SRS473883	GSM1216769	EFO:0000246	age	58	58	UO:0000036	year	Islet Cell
SRS473884	GSM1216770	EFO:0000246	age	56	56	UO:0000036	year	Islet Cell
SRS473885	GSM1216771	EFO:0000246	age	64	64	UO:0000036	year	Islet Cell
SRS473886	GSM1216772	EFO:0000246	age	72	72	UO:0000036	year	Islet Cell
SRS473887	GSM1216773	EFO:0000246	age	27	27	UO:0000036	year	Islet Cell
SRS473888	GSM1216774	EFO:0000246	age	55	55	UO:0000036	year	Islet Cell
SRS473889	GSM1216775	EFO:0000246	age	44	44	UO:0000036	year	Islet Cell
SRS473890	GSM1216776	EFO:0000246	age	59	59	UO:0000036	year	Islet Cell
SRS473891	GSM1216777	EFO:0000246	age	61	61	UO:0000036	year	Islet Cell
SRS473892	GSM1216778	EFO:0000246	age	62	62	UO:0000036	year	Islet Cell
SRS473893	GSM1216779	EFO:0000246	age	50	50	UO:0000036	year	Islet Cell
SRS473894	GSM1216780	EFO:0000246	age	55	55	UO:0000036	year	Islet Cell
SRS473896	GSM1216782	EFO:0000246	age	70	70	UO:0000036	year	Islet Cell
SRS473897	GSM1216786	EFO:0000246	age	33	33	UO:0000036	year	Islet Cell
SRS473898	GSM1216787	EFO:0000246	age	75	75	UO:0000036	year	Islet Cell
SRS473899	GSM1216789	EFO:0000246	age	69	69	UO:0000036	year	Islet Cell
SRS473900	GSM1216788	EFO:0000246	age	47	47	UO:0000036	year	Islet Cell
SRS473901	GSM1216790	EFO:0000246	age	70	70	UO:0000036	year	Islet Cell
SRS473902	GSM1216791	EFO:0000246	age	55	55	UO:0000036	year	Islet Cell
SRS473903	GSM1216793	EFO:0000246	age	63	63	UO:0000036	year	Islet Cell
SRS473904	GSM1216792	EFO:0000246	age	57	57	UO:0000036	year	Islet Cell
SRS473907	GSM1216796	EFO:0000246	age	54	54	UO:0000036	year	Islet Cell
SRS473908	GSM1216797	EFO:0000246	age	58	58	UO:0000036	year	Islet Cell
SRS473910	GSM1216799	EFO:0000246	age	61	61	UO:0000036	year	Islet Cell
SRS473911	GSM1216800	EFO:0000246	age	65	65	UO:0000036	year	Islet Cell
SRS473912	GSM1216801	EFO:0000246	age	68	68	UO:0000036	year	Islet Cell
SRS473913	GSM1216802	EFO:0000246	age	65	65	UO:0000036	year	Islet Cell
SRS473914	GSM1216803	EFO:0000246	age	57	57	UO:0000036	year	Islet Cell
SRS473915	GSM1216804	EFO:0000246	age	41	41	UO:0000036	year	Islet Cell
SRS473916	GSM1216805	EFO:0000246	age	58	58	UO:0000036	year	Islet Cell
SRS473917	GSM1216806	EFO:0000246	age	63	63	UO:0000036	year	Islet Cell
SRS473920	GSM1216810	EFO:0000246	age	68	68	UO:0000036	year	Islet Cell
SRS473921	GSM1216809	EFO:0000246	age	59	59	UO:0000036	year	Islet Cell
SRS473922	GSM1216811	EFO:0000246	age	52	52	UO:0000036	year	Islet Cell
SRS473923	GSM1216812	EFO:0000246	age	35	35	UO:0000036	year	Islet Cell
SRS473924	GSM1216813	EFO:0000246	age	54	54	UO:0000036	year	Islet Cell
SRS473925	GSM1216814	EFO:0000246	age	70	70	UO:0000036	year	Islet Cell
SRS473926	GSM1216815	EFO:0000246	age	41	41	UO:0000036	year	Islet Cell
SRS473927	GSM1216816	EFO:0000246	age	64	64	UO:0000036	year	Islet Cell
SRS473928	GSM1216817	EFO:0000246	age	68	68	UO:0000036	year	Islet Cell
SRS473929	GSM1216818	EFO:0000246	age	61	61	UO:0000036	year	Islet Cell
SRS473930	GSM1216819	EFO:0000246	age	40	40	UO:0000036	year	Islet Cell
SRS473931	GSM1216820	EFO:0000246	age	65	65	UO:0000036	year	Islet Cell
SRS473932	GSM1216821	EFO:0000246	age	69	69	UO:0000036	year	Islet Cell
SRS473933	GSM1216822	EFO:0000246	age	53	53	UO:0000036	year	Islet Cell
SRS473934	GSM1216823	EFO:0000246	age	61	61	UO:0000036	year	Islet Cell
SRS473935	GSM1216824	EFO:0000246	age	70	70	UO:0000036	year	Islet Cell
SRS473936	GSM1216825	EFO:0000246	age	68	68	UO:0000036	year	Islet Cell
SRS473937	GSM1216826	EFO:0000246	age	63	63	UO:0000036	year	Islet Cell
SRS473938	GSM1216827	EFO:0000246	age	64	64	UO:0000036	year	Islet Cell
SRS473939	GSM1216828	EFO:0000246	age	68	68	UO:0000036	year	Islet Cell
SRS473940	GSM1216829	EFO:0000246	age	56	56	UO:0000036	year	Islet Cell
SRS473942	GSM1216831	EFO:0000246	age	52	52	UO:0000036	year	Islet Cell
SRS473943	GSM1216832	EFO:0000246	age	60	60	UO:0000036	year	Islet Cell
SRS473944	GSM1216833	EFO:0000246	age	63	63	UO:0000036	year	Islet Cell
SRS473946	GSM1216835	EFO:0000246	age	63	63	UO:0000036	year	Islet Cell
SRS473948	GSM1216837	EFO:0000246	age	53	53	UO:0000036	year	Islet Cell
SRS473949	GSM1216838	EFO:0000246	age	54	54	UO:0000036	year	Islet Cell
SRS473950	GSM1216839	EFO:0000246	age	68	68	UO:0000036	year	Islet Cell
SRS473951	GSM1216840	EFO:0000246	age	30	30	UO:0000036	year	Islet Cell
SRS473952	GSM1216841	EFO:0000246	age	37	37	UO:0000036	year	Islet Cell
SRS4742650	GSM3758039	EFO:0000246	age	61	61	UO:0000036	year	Liver
SRS4742666	GSM3758055	EFO:0000246	age	59	59	UO:0000036	year	Liver
SRS4742684	GSM3758073	EFO:0000246	age	68	68	UO:0000036	year	Liver
SRS4742686	GSM3758075	EFO:0000246	age	64	64	UO:0000036	year	Liver
SRS4742687	GSM3758076	EFO:0000246	age	26	26	UO:0000036	year	Liver
SRS4742688	GSM3758077	EFO:0000246	age	60	60	UO:0000036	year	Liver
SRS4742693	GSM3758082	EFO:0000246	age	62	62	UO:0000036	year	Liver
SRS4802395	GSM3790249	EFO:0000246	age	62	62	UO:0000036	year	Blood
SRS4802396	GSM3790250	EFO:0000246	age	62	62	UO:0000036	year	Blood
SRS4802397	GSM3790251	EFO:0000246	age	48	48	UO:0000036	year	Blood
SRS4802399	GSM3790253	EFO:0000246	age	62	62	UO:0000036	year	Blood
SRS4802400	GSM3790254	EFO:0000246	age	62	62	UO:0000036	year	Blood
SRS4802401	GSM3790255	EFO:0000246	age	48	48	UO:0000036	year	Blood
SRS484997	GSM1234235	EFO:0000246	age	54	54Y	UO:0000036	year	Endothelial Cell
SRS484998	GSM1234236	EFO:0000246	age	54	54Y	UO:0000036	year	Endothelial Cell
SRS4878724	GSM3854174	EFO:0000246	age	62	62Y	UO:0000036	year	Keratinocyte
SRS4878725	GSM3854175	EFO:0000246	age	62	62Y	UO:0000036	year	Keratinocyte
SRS4878726	GSM3854176	EFO:0000246	age	62	62Y	UO:0000036	year	Keratinocyte
SRS500529	GSM1261651	EFO:0000246	age	37	37	UO:0000036	year	Islet Cell
SRS500530	GSM1261652	EFO:0000246	age	54	54	UO:0000036	year	Islet Cell
SRS500531	GSM1261653	EFO:0000246	age	60	60	UO:0000036	year	Islet Cell
SRS5029210	GSM3906185	EFO:0000246	age	60	60	UO:0000036	year	Microglia
SRS5067482	GSM3929498	EFO:0000246	age	48	48	UO:0000036	year	Islet Cell
SRS5067483	GSM3929499	EFO:0000246	age	62	62	UO:0000036	year	Islet Cell
SRS5067484	GSM3929500	EFO:0000246	age	43	43	UO:0000036	year	Islet Cell
SRS5067485	GSM3929501	EFO:0000246	age	53	53	UO:0000036	year	Islet Cell
SRS5067486	GSM3929502	EFO:0000246	age	48	48	UO:0000036	year	Islet Cell
SRS5067487	GSM3929503	EFO:0000246	age	62	62	UO:0000036	year	Islet Cell
SRS5067488	GSM3929504	EFO:0000246	age	43	43	UO:0000036	year	Islet Cell
SRS5067489	GSM3929505	EFO:0000246	age	53	53	UO:0000036	year	Islet Cell
SRS5082328	GSM3936209	EFO:0000246	age	20	20	UO:0000036	year	Blood
SRS5082329	GSM3936210	EFO:0000246	age	70	70	UO:0000036	year	Blood
SRS5082330	GSM3936211	EFO:0000246	age	21	21	UO:0000036	year	Blood
SRS5082331	GSM3936212	EFO:0000246	age	22	22	UO:0000036	year	Blood
SRS5082332	GSM3936213	EFO:0000246	age	28	28	UO:0000036	year	Blood
SRS5082334	GSM3936215	EFO:0000246	age	28	28	UO:0000036	year	Blood
SRS5082335	GSM3936217	EFO:0000246	age	21	21	UO:0000036	year	Blood
SRS5082336	GSM3936216	EFO:0000246	age	20	20	UO:0000036	year	Blood
SRS5082337	GSM3936218	EFO:0000246	age	23	23	UO:0000036	year	Blood
SRS5082338	GSM3936219	EFO:0000246	age	23	23	UO:0000036	year	Blood
SRS5082340	GSM3936222	EFO:0000246	age	23	23	UO:0000036	year	Blood
SRS5082341	GSM3936221	EFO:0000246	age	24	24	UO:0000036	year	Blood
SRS5082342	GSM3936223	EFO:0000246	age	20	20	UO:0000036	year	Blood
SRS5082343	GSM3936224	EFO:0000246	age	20	20	UO:0000036	year	Blood
SRS5082344	GSM3936225	EFO:0000246	age	25	25	UO:0000036	year	Blood
SRS5082345	GSM3936227	EFO:0000246	age	33	33	UO:0000036	year	Blood
SRS5082346	GSM3936226	EFO:0000246	age	23	23	UO:0000036	year	Blood
SRS5082347	GSM3936228	EFO:0000246	age	21	21	UO:0000036	year	Blood
SRS5082348	GSM3936229	EFO:0000246	age	24	24	UO:0000036	year	Blood
SRS5082349	GSM3936230	EFO:0000246	age	50	50	UO:0000036	year	Blood
SRS5082350	GSM3936231	EFO:0000246	age	58	58	UO:0000036	year	Blood
SRS5082351	GSM3936232	EFO:0000246	age	20	20	UO:0000036	year	Blood
SRS5082352	GSM3936234	EFO:0000246	age	21	21	UO:0000036	year	Blood
SRS5082353	GSM3936233	EFO:0000246	age	26	26	UO:0000036	year	Blood
SRS5082354	GSM3936235	EFO:0000246	age	21	21	UO:0000036	year	Blood
SRS5082355	GSM3936236	EFO:0000246	age	59	59	UO:0000036	year	Blood
SRS5082356	GSM3936237	EFO:0000246	age	27	27	UO:0000036	year	Blood
SRS5082357	GSM3936239	EFO:0000246	age	23	23	UO:0000036	year	Blood
SRS5082358	GSM3936238	EFO:0000246	age	23	23	UO:0000036	year	Blood
SRS5082359	GSM3936240	EFO:0000246	age	24	24	UO:0000036	year	Blood
SRS5082360	GSM3936241	EFO:0000246	age	28	28	UO:0000036	year	Blood
SRS5082361	GSM3936242	EFO:0000246	age	20	20	UO:0000036	year	Blood
SRS5082362	GSM3936243	EFO:0000246	age	69	69	UO:0000036	year	Blood
SRS5082363	GSM3936244	EFO:0000246	age	20	20	UO:0000036	year	Blood
SRS5082365	GSM3936247	EFO:0000246	age	61	61	UO:0000036	year	Blood
SRS5082366	GSM3936246	EFO:0000246	age	32	32	UO:0000036	year	Blood
SRS5082367	GSM3936248	EFO:0000246	age	22	22	UO:0000036	year	Blood
SRS5082368	GSM3936249	EFO:0000246	age	21	21	UO:0000036	year	Blood
SRS5082370	GSM3936251	EFO:0000246	age	68	68	UO:0000036	year	Blood
SRS5082371	GSM3936252	EFO:0000246	age	21	21	UO:0000036	year	Blood
SRS5082372	GSM3936253	EFO:0000246	age	24	24	UO:0000036	year	Blood
SRS5082374	GSM3936254	EFO:0000246	age	21	21	UO:0000036	year	Blood
SRS5082375	GSM3936257	EFO:0000246	age	24	24	UO:0000036	year	Blood
SRS5082377	GSM3936263	EFO:0000246	age	23	23	UO:0000036	year	Blood
SRS5082378	GSM3936266	EFO:0000246	age	22	22	UO:0000036	year	Blood
SRS5082380	GSM3936274	EFO:0000246	age	25	25	UO:0000036	year	Blood
SRS5082381	GSM3936273	EFO:0000246	age	24	24	UO:0000036	year	Blood
SRS5082382	GSM3936275	EFO:0000246	age	43	43	UO:0000036	year	Blood
SRS5082384	GSM3936277	EFO:0000246	age	23	23	UO:0000036	year	Blood
SRS5082385	GSM3936278	EFO:0000246	age	60	60	UO:0000036	year	Blood
SRS5082386	GSM3936279	EFO:0000246	age	22	22	UO:0000036	year	Blood
SRS5082387	GSM3936280	EFO:0000246	age	23	23	UO:0000036	year	Blood
SRS5082388	GSM3936281	EFO:0000246	age	20	20	UO:0000036	year	Blood
SRS5082389	GSM3936283	EFO:0000246	age	64	64	UO:0000036	year	Blood
SRS5082390	GSM3936282	EFO:0000246	age	50	50	UO:0000036	year	Blood
SRS5082392	GSM3936285	EFO:0000246	age	20	20	UO:0000036	year	Blood
SRS5082393	GSM3936286	EFO:0000246	age	22	22	UO:0000036	year	Blood
SRS5082394	GSM3936287	EFO:0000246	age	63	63	UO:0000036	year	Blood
SRS5082396	GSM3936289	EFO:0000246	age	23	23	UO:0000036	year	Blood
SRS5082397	GSM3936291	EFO:0000246	age	49	49	UO:0000036	year	Blood
SRS5082398	GSM3936290	EFO:0000246	age	24	24	UO:0000036	year	Blood
SRS5082399	GSM3936292	EFO:0000246	age	21	21	UO:0000036	year	Blood
SRS5082400	GSM3936293	EFO:0000246	age	23	23	UO:0000036	year	Blood
SRS5082401	GSM3936294	EFO:0000246	age	48	48	UO:0000036	year	Blood
SRS5082402	GSM3936296	EFO:0000246	age	23	23	UO:0000036	year	Blood
SRS5082403	GSM3936295	EFO:0000246	age	23	23	UO:0000036	year	Blood
SRS5082404	GSM3936297	EFO:0000246	age	23	23	UO:0000036	year	Blood
SRS5082405	GSM3936298	EFO:0000246	age	20	20	UO:0000036	year	Blood
SRS5082407	GSM3936300	EFO:0000246	age	26	26	UO:0000036	year	Blood
SRS5082408	GSM3936301	EFO:0000246	age	73	73	UO:0000036	year	Blood
SRS5082409	GSM3936302	EFO:0000246	age	55	55	UO:0000036	year	Blood
SRS5082410	GSM3936303	EFO:0000246	age	20	20	UO:0000036	year	Blood
SRS5082411	GSM3936304	EFO:0000246	age	20	20	UO:0000036	year	Blood
SRS5082412	GSM3936306	EFO:0000246	age	23	23	UO:0000036	year	Blood
SRS5082413	GSM3936305	EFO:0000246	age	24	24	UO:0000036	year	Blood
SRS5082415	GSM3936309	EFO:0000246	age	22	22	UO:0000036	year	Blood
SRS5082416	GSM3936308	EFO:0000246	age	24	24	UO:0000036	year	Blood
SRS5082417	GSM3936310	EFO:0000246	age	24	24	UO:0000036	year	Blood
SRS5082418	GSM3936311	EFO:0000246	age	20	20	UO:0000036	year	Blood
SRS5082419	GSM3936312	EFO:0000246	age	21	21	UO:0000036	year	Blood
SRS5082420	GSM3936314	EFO:0000246	age	27	27	UO:0000036	year	Blood
SRS5082421	GSM3936313	EFO:0000246	age	22	22	UO:0000036	year	Blood
SRS5082422	GSM3936315	EFO:0000246	age	28	28	UO:0000036	year	Blood
SRS5082423	GSM3936316	EFO:0000246	age	24	24	UO:0000036	year	Blood
SRS5082424	GSM3936317	EFO:0000246	age	40	40	UO:0000036	year	Blood
SRS5082425	GSM3936318	EFO:0000246	age	28	28	UO:0000036	year	Blood
SRS5082426	GSM3936319	EFO:0000246	age	25	25	UO:0000036	year	Blood
SRS5082427	GSM3936320	EFO:0000246	age	48	48	UO:0000036	year	Blood
SRS5095429	GSM3940599	EFO:0000246	age	87	87Y	UO:0000036	year	Sebocyte
SRS5095430	GSM3940601	EFO:0000246	age	87	87Y	UO:0000036	year	Sebocyte
SRS5095431	GSM3940600	EFO:0000246	age	87	87Y	UO:0000036	year	Sebocyte
SRS5115843	GSM3953337	EFO:0000246	age	40	40	UO:0000036	year	Endothelial Cell
SRS5115844	GSM3953336	EFO:0000246	age	40	40	UO:0000036	year	Endothelial Cell
SRS5115847	GSM3953338	EFO:0000246	age	40	40	UO:0000036	year	Endothelial Cell
SRS5174370	GSM3984485	EFO:0000246	age	40	40	UO:0000036	year	Heart
SRS5174371	GSM3984486	EFO:0000246	age	45	45	UO:0000036	year	Heart
SRS5174372	GSM3984487	EFO:0000246	age	39	39	UO:0000036	year	Heart
SRS5174373	GSM3984488	EFO:0000246	age	43	43	UO:0000036	year	Heart
SRS5174374	GSM3984489	EFO:0000246	age	44	44	UO:0000036	year	Heart
SRS5174375	GSM3984490	EFO:0000246	age	48	48	UO:0000036	year	Heart
SRS5174376	GSM3984491	EFO:0000246	age	40	40	UO:0000036	year	Heart
SRS5174377	GSM3984492	EFO:0000246	age	34	34	UO:0000036	year	Heart
SRS5174378	GSM3984493	EFO:0000246	age	42	42	UO:0000036	year	Heart
SRS5181794	GSM3993154	EFO:0000246	age	67	67	UO:0000036	year	Epithelial Cell
SRS5181796	GSM3993155	EFO:0000246	age	67	67	UO:0000036	year	Epithelial Cell
SRS5181797	GSM3993156	EFO:0000246	age	67	67	UO:0000036	year	Epithelial Cell
SRS5181798	GSM3993157	EFO:0000246	age	67	67	UO:0000036	year	Epithelial Cell
SRS5181801	GSM3993159	EFO:0000246	age	67	67	UO:0000036	year	Epithelial Cell
SRS5181802	GSM3993160	EFO:0000246	age	42	42	UO:0000036	year	Epithelial Cell
SRS5181803	GSM3993158	EFO:0000246	age	67	67	UO:0000036	year	Epithelial Cell
SRS5181804	GSM3993161	EFO:0000246	age	42	42	UO:0000036	year	Epithelial Cell
SRS5181805	GSM3993162	EFO:0000246	age	42	42	UO:0000036	year	Epithelial Cell
SRS5181806	GSM3993163	EFO:0000246	age	42	42	UO:0000036	year	Epithelial Cell
SRS5181807	GSM3993164	EFO:0000246	age	42	42	UO:0000036	year	Epithelial Cell
SRS5181808	GSM3993165	EFO:0000246	age	42	42	UO:0000036	year	Epithelial Cell
SRS5181809	GSM3993166	EFO:0000246	age	38	38	UO:0000036	year	Epithelial Cell
SRS5181810	GSM3993167	EFO:0000246	age	38	38	UO:0000036	year	Epithelial Cell
SRS5181811	GSM3993168	EFO:0000246	age	38	38	UO:0000036	year	Epithelial Cell
SRS5181812	GSM3993169	EFO:0000246	age	38	38	UO:0000036	year	Epithelial Cell
SRS5181813	GSM3993170	EFO:0000246	age	38	38	UO:0000036	year	Epithelial Cell
SRS5181814	GSM3993171	EFO:0000246	age	38	38	UO:0000036	year	Epithelial Cell
SRS5268605	GSM4035017	EFO:0000246	age	74	74	UO:0000036	year	Brain
SRS5268609	GSM4035021	EFO:0000246	age	90	90	UO:0000036	year	Brain
SRS5268610	GSM4035022	EFO:0000246	age	89	89	UO:0000036	year	Brain
SRS5268611	GSM4035023	EFO:0000246	age	90	90	UO:0000036	year	Brain
SRS5268612	GSM4035024	EFO:0000246	age	89	89	UO:0000036	year	Brain
SRS5268614	GSM4035026	EFO:0000246	age	72	72	UO:0000036	year	Brain
SRS5268617	GSM4035029	EFO:0000246	age	90	90	UO:0000036	year	Brain
SRS5268618	GSM4035030	EFO:0000246	age	90	90	UO:0000036	year	Brain
SRS5268621	GSM4035033	EFO:0000246	age	90	90	UO:0000036	year	Brain
SRS5268625	GSM4035037	EFO:0000246	age	90	90	UO:0000036	year	Brain
SRS5268626	GSM4035038	EFO:0000246	age	81	81	UO:0000036	year	Brain
SRS5268627	GSM4035039	EFO:0000246	age	86	86	UO:0000036	year	Brain
SRS5279314	GSM4037583	EFO:0000246	age	26	26	UO:0000036	year	Monocyte
SRS5279319	GSM4037588	EFO:0000246	age	35	35	UO:0000036	year	Monocyte
SRS5279324	GSM4037593	EFO:0000246	age	37	37	UO:0000036	year	Monocyte
SRS5279326	GSM4037595	EFO:0000246	age	43	43	UO:0000036	year	Monocyte
SRS5279329	GSM4037598	EFO:0000246	age	66	66	UO:0000036	year	Monocyte
SRS5279330	GSM4037599	EFO:0000246	age	69	69	UO:0000036	year	Monocyte
SRS5279331	GSM4037600	EFO:0000246	age	72	72	UO:0000036	year	Monocyte
SRS5279332	GSM4037601	EFO:0000246	age	68	68	UO:0000036	year	Monocyte
SRS5279333	GSM4037602	EFO:0000246	age	62	62	UO:0000036	year	Monocyte
SRS5279334	GSM4037603	EFO:0000246	age	68	68	UO:0000036	year	Monocyte
SRS5279335	GSM4037604	EFO:0000246	age	68	68	UO:0000036	year	Monocyte
SRS5279336	GSM4037605	EFO:0000246	age	60	60	UO:0000036	year	Monocyte
SRS5279337	GSM4037606	EFO:0000246	age	72	72	UO:0000036	year	Monocyte
SRS5279338	GSM4037607	EFO:0000246	age	74	74	UO:0000036	year	Monocyte
SRS5279339	GSM4037608	EFO:0000246	age	67	67	UO:0000036	year	Monocyte
SRS5279340	GSM4037609	EFO:0000246	age	69	69	UO:0000036	year	Monocyte
SRS5279342	GSM4037610	EFO:0000246	age	24	24	UO:0000036	year	Monocyte
SRS5279343	GSM4037611	EFO:0000246	age	24	24	UO:0000036	year	Monocyte
SRS5279344	GSM4037612	EFO:0000246	age	27	27	UO:0000036	year	Monocyte
SRS5279345	GSM4037613	EFO:0000246	age	27	27	UO:0000036	year	Monocyte
SRS5279346	GSM4037614	EFO:0000246	age	28	28	UO:0000036	year	Monocyte
SRS5279347	GSM4037615	EFO:0000246	age	28	28	UO:0000036	year	Monocyte
SRS5279348	GSM4037616	EFO:0000246	age	29	29	UO:0000036	year	Monocyte
SRS5279349	GSM4037617	EFO:0000246	age	30	30	UO:0000036	year	Monocyte
SRS5279350	GSM4037618	EFO:0000246	age	33	33	UO:0000036	year	Monocyte
SRS5279351	GSM4037619	EFO:0000246	age	36	36	UO:0000036	year	Monocyte
SRS5279352	GSM4037620	EFO:0000246	age	38	38	UO:0000036	year	Monocyte
SRS5279353	GSM4037621	EFO:0000246	age	35	35	UO:0000036	year	Monocyte
SRS5326411	GSM4047114	EFO:0000246	age	24	24	UO:0000036	year	Skin
SRS5326417	GSM4047120	EFO:0000246	age	27	27	UO:0000036	year	Skin
SRS5326421	GSM4047124	EFO:0000246	age	23	23	UO:0000036	year	Skin
SRS5326423	GSM4047126	EFO:0000246	age	20	20	UO:0000036	year	Skin
SRS5326427	GSM4047130	EFO:0000246	age	25	25	UO:0000036	year	Skin
SRS5326429	GSM4047132	EFO:0000246	age	21	21	UO:0000036	year	Skin
SRS5326431	GSM4047134	EFO:0000246	age	27	27	UO:0000036	year	Skin
SRS5326554	GSM4047467	EFO:0000246	age	30.5	30Y6M	UO:0000036	year	Uterus
SRS5326555	GSM4047468	EFO:0000246	age	30.5	30Y6M	UO:0000036	year	Uterus
SRS5326556	GSM4047469	EFO:0000246	age	30.5	30Y6M	UO:0000036	year	Uterus
SRS5350253	GSM4061938	EFO:0000246	age	38	38	UO:0000036	year	Heart
SRS5350254	GSM4061939	EFO:0000246	age	40	40	UO:0000036	year	Heart
SRS5350255	GSM4061940	EFO:0000246	age	42	42	UO:0000036	year	Heart
SRS5350256	GSM4061941	EFO:0000246	age	48	48	UO:0000036	year	Heart
SRS5350257	GSM4061942	EFO:0000246	age	52	52	UO:0000036	year	Heart
SRS5350258	GSM4061943	EFO:0000246	age	52	52	UO:0000036	year	Heart
SRS5350259	GSM4061944	EFO:0000246	age	59	59	UO:0000036	year	Heart
SRS5350260	GSM4061945	EFO:0000246	age	59	59	UO:0000036	year	Heart
SRS5350261	GSM4061946	EFO:0000246	age	61	61	UO:0000036	year	Heart
SRS5350262	GSM4061947	EFO:0000246	age	68	68	UO:0000036	year	Heart
SRS5350263	GSM4061948	EFO:0000246	age	71	71	UO:0000036	year	Heart
SRS5350264	GSM4061949	EFO:0000246	age	71	71	UO:0000036	year	Heart
SRS5370989	GSM4073751	EFO:0000246	age	52	52	UO:0000036	year	Fallopian Tube
SRS5370991	GSM4073753	EFO:0000246	age	51	51	UO:0000036	year	Fallopian Tube
SRS5370993	GSM4073755	EFO:0000246	age	46	46	UO:0000036	year	Fallopian Tube
SRS5370995	GSM4073757	EFO:0000246	age	47	47	UO:0000036	year	Fallopian Tube
SRS5370997	GSM4073759	EFO:0000246	age	58	58	UO:0000036	year	Fallopian Tube
SRS5370999	GSM4073761	EFO:0000246	age	45	45	UO:0000036	year	Fallopian Tube
SRS5371001	GSM4073763	EFO:0000246	age	58	58	UO:0000036	year	Fallopian Tube
SRS5371003	GSM4073765	EFO:0000246	age	45	45	UO:0000036	year	Fallopian Tube
SRS5434538	GSM4095224	EFO:0000246	age	50	50	UO:0000036	year	CD4+ T cells
SRS5434539	GSM4095225	EFO:0000246	age	50	50	UO:0000036	year	CD8+ T cells
SRS5434540	GSM4095226	EFO:0000246	age	50	50	UO:0000036	year	CD4+ T cells
SRS5434541	GSM4095227	EFO:0000246	age	50	50	UO:0000036	year	CD8+ T cells
SRS5434542	GSM4095228	EFO:0000246	age	41	41	UO:0000036	year	CD4+ T cells
SRS5434543	GSM4095229	EFO:0000246	age	41	41	UO:0000036	year	CD8+ T cells
SRS5434544	GSM4095230	EFO:0000246	age	41	41	UO:0000036	year	CD4+ T cells
SRS5434545	GSM4095231	EFO:0000246	age	41	41	UO:0000036	year	CD8+ T cells
SRS5434546	GSM4095232	EFO:0000246	age	54	54	UO:0000036	year	CD4+ T cells
SRS5434547	GSM4095233	EFO:0000246	age	54	54	UO:0000036	year	CD8+ T cells
SRS5434548	GSM4095234	EFO:0000246	age	54	54	UO:0000036	year	CD4+ T cells
SRS5434549	GSM4095235	EFO:0000246	age	54	54	UO:0000036	year	CD8+ T cells
SRS5434550	GSM4095236	EFO:0000246	age	32	32	UO:0000036	year	CD4+ T cells
SRS5434551	GSM4095237	EFO:0000246	age	32	32	UO:0000036	year	CD8+ T cells
SRS5434552	GSM4095238	EFO:0000246	age	32	32	UO:0000036	year	CD4+ T cells
SRS5434553	GSM4095239	EFO:0000246	age	32	32	UO:0000036	year	CD8+ T cells
SRS5434554	GSM4095240	EFO:0000246	age	58	58	UO:0000036	year	CD4+ T cells
SRS5434555	GSM4095241	EFO:0000246	age	58	58	UO:0000036	year	CD8+ T cells
SRS5434556	GSM4095242	EFO:0000246	age	58	58	UO:0000036	year	CD4+ T cells
SRS5434557	GSM4095243	EFO:0000246	age	58	58	UO:0000036	year	CD8+ T cells
SRS5434558	GSM4095244	EFO:0000246	age	34	34	UO:0000036	year	CD4+ T cells
SRS5434559	GSM4095245	EFO:0000246	age	34	34	UO:0000036	year	CD4+ T cells
SRS5434560	GSM4095246	EFO:0000246	age	34	34	UO:0000036	year	CD8+ T cells
SRS5434561	GSM4095247	EFO:0000246	age	43	43	UO:0000036	year	CD4+ T cells
SRS5434562	GSM4095248	EFO:0000246	age	43	43	UO:0000036	year	CD8+ T cells
SRS5434563	GSM4095249	EFO:0000246	age	43	43	UO:0000036	year	CD4+ T cells
SRS5434564	GSM4095250	EFO:0000246	age	43	43	UO:0000036	year	CD8+ T cells
SRS5434565	GSM4095251	EFO:0000246	age	57	57	UO:0000036	year	CD4+ T cells
SRS5434566	GSM4095252	EFO:0000246	age	57	57	UO:0000036	year	CD8+ T cells
SRS5434567	GSM4095253	EFO:0000246	age	57	57	UO:0000036	year	CD4+ T cells
SRS5434568	GSM4095254	EFO:0000246	age	57	57	UO:0000036	year	CD8+ T cells
SRS5434569	GSM4095255	EFO:0000246	age	39	39	UO:0000036	year	CD4+ T cells
SRS5434570	GSM4095256	EFO:0000246	age	39	39	UO:0000036	year	CD8+ T cells
SRS5434571	GSM4095257	EFO:0000246	age	39	39	UO:0000036	year	CD4+ T cells
SRS5434572	GSM4095258	EFO:0000246	age	39	39	UO:0000036	year	CD8+ T cells
SRS5434573	GSM4095259	EFO:0000246	age	41	41	UO:0000036	year	CD4+ T cells
SRS5434574	GSM4095260	EFO:0000246	age	41	41	UO:0000036	year	CD8+ T cells
SRS5434575	GSM4095261	EFO:0000246	age	41	41	UO:0000036	year	CD4+ T cells
SRS5434576	GSM4095262	EFO:0000246	age	41	41	UO:0000036	year	CD8+ T cells
SRS5434577	GSM4095263	EFO:0000246	age	52	52	UO:0000036	year	CD4+ T cells
SRS5434578	GSM4095264	EFO:0000246	age	52	52	UO:0000036	year	CD8+ T cells
SRS5434579	GSM4095265	EFO:0000246	age	52	52	UO:0000036	year	CD4+ T cells
SRS5434580	GSM4095266	EFO:0000246	age	52	52	UO:0000036	year	CD8+ T cells
SRS5434581	GSM4095267	EFO:0000246	age	50	50	UO:0000036	year	CD4+ T cells
SRS5434582	GSM4095268	EFO:0000246	age	50	50	UO:0000036	year	CD4+ T cells
SRS5434583	GSM4095269	EFO:0000246	age	41	41	UO:0000036	year	CD4+ T cells
SRS5434584	GSM4095270	EFO:0000246	age	41	41	UO:0000036	year	CD4+ T cells
SRS5434585	GSM4095271	EFO:0000246	age	54	54	UO:0000036	year	CD4+ T cells
SRS5434586	GSM4095272	EFO:0000246	age	54	54	UO:0000036	year	CD4+ T cells
SRS5434587	GSM4095273	EFO:0000246	age	32	32	UO:0000036	year	CD4+ T cells
SRS5434588	GSM4095274	EFO:0000246	age	58	58	UO:0000036	year	CD4+ T cells
SRS5434589	GSM4095275	EFO:0000246	age	58	58	UO:0000036	year	CD8+ T cells
SRS5434590	GSM4095276	EFO:0000246	age	34	34	UO:0000036	year	CD4+ T cells
SRS5434591	GSM4095277	EFO:0000246	age	34	34	UO:0000036	year	CD4+ T cells
SRS5434592	GSM4095278	EFO:0000246	age	34	34	UO:0000036	year	CD8+ T cells
SRS5434593	GSM4095279	EFO:0000246	age	43	43	UO:0000036	year	CD4+ T cells
SRS5434594	GSM4095280	EFO:0000246	age	43	43	UO:0000036	year	CD8+ T cells
SRS5434595	GSM4095281	EFO:0000246	age	43	43	UO:0000036	year	CD4+ T cells
SRS5434596	GSM4095282	EFO:0000246	age	57	57	UO:0000036	year	CD4+ T cells
SRS5434597	GSM4095283	EFO:0000246	age	57	57	UO:0000036	year	CD4+ T cells
SRS5434598	GSM4095284	EFO:0000246	age	39	39	UO:0000036	year	CD4+ T cells
SRS5434599	GSM4095285	EFO:0000246	age	41	41	UO:0000036	year	CD4+ T cells
SRS5434600	GSM4095286	EFO:0000246	age	41	41	UO:0000036	year	CD4+ T cells
SRS5434601	GSM4095287	EFO:0000246	age	52	52	UO:0000036	year	CD4+ T cells
SRS5434602	GSM4095288	EFO:0000246	age	52	52	UO:0000036	year	CD4+ T cells
SRS5434603	GSM4095289	EFO:0000246	age	50	50	UO:0000036	year	CD4+ T cells
SRS5434604	GSM4095290	EFO:0000246	age	50	50	UO:0000036	year	CD8+ T cells
SRS5434605	GSM4095291	EFO:0000246	age	50	50	UO:0000036	year	CD4+ T cells
SRS5434606	GSM4095292	EFO:0000246	age	50	50	UO:0000036	year	CD8+ T cells
SRS5434607	GSM4095293	EFO:0000246	age	41	41	UO:0000036	year	CD4+ T cells
SRS5434608	GSM4095294	EFO:0000246	age	41	41	UO:0000036	year	CD4+ T cells
SRS5434609	GSM4095295	EFO:0000246	age	54	54	UO:0000036	year	CD4+ T cells
SRS5434610	GSM4095296	EFO:0000246	age	54	54	UO:0000036	year	CD8+ T cells
SRS5434611	GSM4095297	EFO:0000246	age	32	32	UO:0000036	year	CD4+ T cells
SRS5434612	GSM4095298	EFO:0000246	age	32	32	UO:0000036	year	CD4+ T cells
SRS5434613	GSM4095299	EFO:0000246	age	32	32	UO:0000036	year	CD8+ T cells
SRS5434614	GSM4095300	EFO:0000246	age	34	34	UO:0000036	year	CD4+ T cells
SRS5434615	GSM4095301	EFO:0000246	age	34	34	UO:0000036	year	CD8+ T cells
SRS5434616	GSM4095302	EFO:0000246	age	34	34	UO:0000036	year	CD4+ T cells
SRS5434617	GSM4095303	EFO:0000246	age	43	43	UO:0000036	year	CD4+ T cells
SRS5434618	GSM4095304	EFO:0000246	age	43	43	UO:0000036	year	CD4+ T cells
SRS5434619	GSM4095305	EFO:0000246	age	43	43	UO:0000036	year	CD8+ T cells
SRS5434620	GSM4095306	EFO:0000246	age	57	57	UO:0000036	year	CD4+ T cells
SRS5434621	GSM4095307	EFO:0000246	age	57	57	UO:0000036	year	CD4+ T cells
SRS5434622	GSM4095308	EFO:0000246	age	39	39	UO:0000036	year	CD8+ T cells
SRS5434623	GSM4095309	EFO:0000246	age	41	41	UO:0000036	year	CD4+ T cells
SRS5434624	GSM4095310	EFO:0000246	age	41	41	UO:0000036	year	CD8+ T cells
SRS5434625	GSM4095311	EFO:0000246	age	41	41	UO:0000036	year	CD4+ T cells
SRS5434626	GSM4095312	EFO:0000246	age	52	52	UO:0000036	year	CD4+ T cells
SRS5434627	GSM4095313	EFO:0000246	age	52	52	UO:0000036	year	CD8+ T cells
SRS5434628	GSM4095314	EFO:0000246	age	52	52	UO:0000036	year	CD4+ T cells
SRS5434629	GSM4095315	EFO:0000246	age	52	52	UO:0000036	year	CD8+ T cells
SRS5434630	GSM4095316	EFO:0000246	age	50	50	UO:0000036	year	CD4+ T cells
SRS5434631	GSM4095317	EFO:0000246	age	50	50	UO:0000036	year	CD4+ T cells
SRS5434632	GSM4095318	EFO:0000246	age	50	50	UO:0000036	year	CD8+ T cells
SRS5434633	GSM4095319	EFO:0000246	age	41	41	UO:0000036	year	CD4+ T cells
SRS5434634	GSM4095320	EFO:0000246	age	41	41	UO:0000036	year	CD8+ T cells
SRS5434635	GSM4095321	EFO:0000246	age	41	41	UO:0000036	year	CD4+ T cells
SRS5434636	GSM4095322	EFO:0000246	age	41	41	UO:0000036	year	CD8+ T cells
SRS5434637	GSM4095323	EFO:0000246	age	54	54	UO:0000036	year	CD4+ T cells
SRS5434638	GSM4095324	EFO:0000246	age	54	54	UO:0000036	year	CD8+ T cells
SRS5434639	GSM4095325	EFO:0000246	age	32	32	UO:0000036	year	CD4+ T cells
SRS5434640	GSM4095326	EFO:0000246	age	32	32	UO:0000036	year	CD8+ T cells
SRS5434641	GSM4095327	EFO:0000246	age	32	32	UO:0000036	year	CD4+ T cells
SRS5434642	GSM4095328	EFO:0000246	age	32	32	UO:0000036	year	CD8+ T cells
SRS5434643	GSM4095329	EFO:0000246	age	58	58	UO:0000036	year	CD4+ T cells
SRS5434644	GSM4095330	EFO:0000246	age	58	58	UO:0000036	year	CD8+ T cells
SRS5434645	GSM4095331	EFO:0000246	age	58	58	UO:0000036	year	CD4+ T cells
SRS5434646	GSM4095332	EFO:0000246	age	58	58	UO:0000036	year	CD8+ T cells
SRS5434647	GSM4095333	EFO:0000246	age	34	34	UO:0000036	year	CD4+ T cells
SRS5434648	GSM4095334	EFO:0000246	age	34	34	UO:0000036	year	CD8+ T cells
SRS5434649	GSM4095335	EFO:0000246	age	34	34	UO:0000036	year	CD4+ T cells
SRS5434650	GSM4095336	EFO:0000246	age	34	34	UO:0000036	year	CD8+ T cells
SRS5434651	GSM4095337	EFO:0000246	age	43	43	UO:0000036	year	CD4+ T cells
SRS5434652	GSM4095338	EFO:0000246	age	43	43	UO:0000036	year	CD8+ T cells
SRS5434653	GSM4095339	EFO:0000246	age	43	43	UO:0000036	year	CD4+ T cells
SRS5434654	GSM4095340	EFO:0000246	age	43	43	UO:0000036	year	CD8+ T cells
SRS5434655	GSM4095341	EFO:0000246	age	57	57	UO:0000036	year	CD4+ T cells
SRS5434656	GSM4095342	EFO:0000246	age	57	57	UO:0000036	year	CD4+ T cells
SRS5434657	GSM4095343	EFO:0000246	age	57	57	UO:0000036	year	CD8+ T cells
SRS5434658	GSM4095344	EFO:0000246	age	39	39	UO:0000036	year	CD4+ T cells
SRS5434659	GSM4095345	EFO:0000246	age	39	39	UO:0000036	year	CD8+ T cells
SRS5434660	GSM4095346	EFO:0000246	age	39	39	UO:0000036	year	CD4+ T cells
SRS5434661	GSM4095347	EFO:0000246	age	39	39	UO:0000036	year	CD8+ T cells
SRS5434662	GSM4095348	EFO:0000246	age	41	41	UO:0000036	year	CD4+ T cells
SRS5434663	GSM4095349	EFO:0000246	age	41	41	UO:0000036	year	CD8+ T cells
SRS5434664	GSM4095350	EFO:0000246	age	41	41	UO:0000036	year	CD4+ T cells
SRS5434665	GSM4095351	EFO:0000246	age	41	41	UO:0000036	year	CD8+ T cells
SRS5434666	GSM4095352	EFO:0000246	age	52	52	UO:0000036	year	CD4+ T cells
SRS5434667	GSM4095353	EFO:0000246	age	52	52	UO:0000036	year	CD8+ T cells
SRS5434668	GSM4095354	EFO:0000246	age	52	52	UO:0000036	year	CD4+ T cells
SRS5434669	GSM4095355	EFO:0000246	age	52	52	UO:0000036	year	CD8+ T cells
SRS5483636	GSM4109632	EFO:0000246	age	56	56	UO:0000036	year	Liver
SRS5483637	GSM4109633	EFO:0000246	age	43	43	UO:0000036	year	Liver
SRS5483638	GSM4109634	EFO:0000246	age	53	53	UO:0000036	year	Liver
SRS5483639	GSM4109635	EFO:0000246	age	52	52	UO:0000036	year	Liver
SRS5483640	GSM4109636	EFO:0000246	age	57	57	UO:0000036	year	Liver
SRS5483641	GSM4109637	EFO:0000246	age	60	60	UO:0000036	year	Liver
SRS5483642	GSM4109638	EFO:0000246	age	53	53	UO:0000036	year	Liver
SRS5483643	GSM4109639	EFO:0000246	age	50	50	UO:0000036	year	Liver
SRS5483644	GSM4109640	EFO:0000246	age	57	57	UO:0000036	year	Liver
SRS5483645	GSM4109641	EFO:0000246	age	65	65	UO:0000036	year	Liver
SRS5483646	GSM4109642	EFO:0000246	age	48	48	UO:0000036	year	Liver
SRS5483647	GSM4109643	EFO:0000246	age	47	47	UO:0000036	year	Liver
SRS5483648	GSM4109644	EFO:0000246	age	60	60	UO:0000036	year	Liver
SRS5483649	GSM4109645	EFO:0000246	age	60	60	UO:0000036	year	Liver
SRS5483650	GSM4109646	EFO:0000246	age	60	60	UO:0000036	year	Liver
SRS5483651	GSM4109647	EFO:0000246	age	57	57	UO:0000036	year	Liver
SRS5483652	GSM4109648	EFO:0000246	age	57	57	UO:0000036	year	Liver
SRS5483653	GSM4109649	EFO:0000246	age	51	51	UO:0000036	year	Liver
SRS5483654	GSM4109650	EFO:0000246	age	45	45	UO:0000036	year	Liver
SRS5483655	GSM4109651	EFO:0000246	age	34	34	UO:0000036	year	Liver
SRS5483656	GSM4109652	EFO:0000246	age	60	60	UO:0000036	year	Liver
SRS5483657	GSM4109653	EFO:0000246	age	56	56	UO:0000036	year	Liver
SRS5483658	GSM4109654	EFO:0000246	age	62	62	UO:0000036	year	Liver
SRS5537629	GSM4128577	EFO:0000246	age	56	56	UO:0000036	year	Kidney Cell
SRS5537630	GSM4128578	EFO:0000246	age	61	61	UO:0000036	year	Kidney Cell
SRS5537631	GSM4128579	EFO:0000246	age	68	68	UO:0000036	year	Kidney Cell
SRS5537632	GSM4128580	EFO:0000246	age	64	64	UO:0000036	year	Kidney Cell
SRS5537635	GSM4128583	EFO:0000246	age	44	44	UO:0000036	year	Kidney Cell
SRS5537636	GSM4128584	EFO:0000246	age	33	33	UO:0000036	year	Kidney Cell
SRS5537637	GSM4128585	EFO:0000246	age	59	59	UO:0000036	year	Kidney Cell
SRS5574007	GSM4140816	EFO:0000246	age	63	63	UO:0000036	year	Epithelial Cell
SRS5574008	GSM4140817	EFO:0000246	age	63	63	UO:0000036	year	Epithelial Cell
SRS5574009	GSM4140818	EFO:0000246	age	63	63	UO:0000036	year	Epithelial Cell
SRS557581	GSM1327874	EFO:0000246	age	46	46	UO:0000036	year	Adipose Tissue
SRS557582	GSM1327875	EFO:0000246	age	35	35	UO:0000036	year	Adipose Tissue
SRS557583	GSM1327876	EFO:0000246	age	56	56	UO:0000036	year	Adipose Tissue
SRS557584	GSM1327877	EFO:0000246	age	46	46	UO:0000036	year	Adipose Tissue
SRS557585	GSM1327878	EFO:0000246	age	36	36	UO:0000036	year	Adipose Tissue
SRS557586	GSM1327879	EFO:0000246	age	26	26	UO:0000036	year	Adipose Tissue
SRS557587	GSM1327880	EFO:0000246	age	55	55	UO:0000036	year	Adipose Tissue
SRS565353	GSM1338124	EFO:0000246	age	68	68	UO:0000036	year	Aorta
SRS565354	GSM1338125	EFO:0000246	age	71	71	UO:0000036	year	Aorta
SRS565355	GSM1338126	EFO:0000246	age	64	64	UO:0000036	year	Aorta
SRS565356	GSM1338127	EFO:0000246	age	60	60	UO:0000036	year	Aorta
SRS565359	GSM1338130	EFO:0000246	age	58	58	UO:0000036	year	Aorta
SRS565361	GSM1338132	EFO:0000246	age	60	60	UO:0000036	year	Aorta
SRS565362	GSM1338133	EFO:0000246	age	56	56	UO:0000036	year	Aorta
SRS565363	GSM1338134	EFO:0000246	age	67	67	UO:0000036	year	Aorta
SRS565364	GSM1338135	EFO:0000246	age	66	66	UO:0000036	year	Aorta
SRS565365	GSM1338136	EFO:0000246	age	65	65	UO:0000036	year	Aorta
SRS565369	GSM1338140	EFO:0000246	age	63	63	UO:0000036	year	Aorta
SRS565370	GSM1338141	EFO:0000246	age	59	59	UO:0000036	year	Aorta
SRS5681778	GSM4173638	EFO:0000246	age	74	74	UO:0000036	year	Fibroblast
SRS5681779	GSM4173639	EFO:0000246	age	70	70	UO:0000036	year	Fibroblast
SRS5681780	GSM4173640	EFO:0000246	age	25	25	UO:0000036	year	Fibroblast
SRS5681781	GSM4173641	EFO:0000246	age	25	25	UO:0000036	year	Fibroblast
SRS5681782	GSM4173642	EFO:0000246	age	25	25	UO:0000036	year	Fibroblast
SRS5681783	GSM4173643	EFO:0000246	age	25	25	UO:0000036	year	Fibroblast
SRS5681784	GSM4173644	EFO:0000246	age	25	25	UO:0000036	year	Fibroblast
SRS5681785	GSM4173645	EFO:0000246	age	75	75	UO:0000036	year	Fibroblast
SRS5681786	GSM4173646	EFO:0000246	age	75	75	UO:0000036	year	Fibroblast
SRS5681787	GSM4173647	EFO:0000246	age	75	75	UO:0000036	year	Fibroblast
SRS5681788	GSM4173648	EFO:0000246	age	32	32	UO:0000036	year	Fibroblast
SRS5681789	GSM4173649	EFO:0000246	age	32	32	UO:0000036	year	Fibroblast
SRS5681790	GSM4173650	EFO:0000246	age	32	32	UO:0000036	year	Fibroblast
SRS5681791	GSM4173651	EFO:0000246	age	32	32	UO:0000036	year	Fibroblast
SRS5681792	GSM4173652	EFO:0000246	age	32	32	UO:0000036	year	Fibroblast
SRS5681793	GSM4173653	EFO:0000246	age	73	73	UO:0000036	year	Fibroblast
SRS5681794	GSM4173654	EFO:0000246	age	73	73	UO:0000036	year	Fibroblast
SRS5681795	GSM4173655	EFO:0000246	age	32	32	UO:0000036	year	Fibroblast
SRS5681796	GSM4173656	EFO:0000246	age	89	89	UO:0000036	year	Fibroblast
SRS5681797	GSM4173657	EFO:0000246	age	89	89	UO:0000036	year	Fibroblast
SRS5681798	GSM4173658	EFO:0000246	age	89	89	UO:0000036	year	Fibroblast
SRS5681799	GSM4173659	EFO:0000246	age	89	89	UO:0000036	year	Fibroblast
SRS5681800	GSM4173660	EFO:0000246	age	56	56	UO:0000036	year	Fibroblast
SRS5681801	GSM4173661	EFO:0000246	age	56	56	UO:0000036	year	Fibroblast
SRS5681802	GSM4173662	EFO:0000246	age	56	56	UO:0000036	year	Fibroblast
SRS5681803	GSM4173663	EFO:0000246	age	56	56	UO:0000036	year	Fibroblast
SRS5681805	GSM4173664	EFO:0000246	age	69	69	UO:0000036	year	Fibroblast
SRS5681806	GSM4173665	EFO:0000246	age	69	69	UO:0000036	year	Fibroblast
SRS5681807	GSM4173666	EFO:0000246	age	61	61	UO:0000036	year	Fibroblast
SRS5681808	GSM4173667	EFO:0000246	age	58	58	UO:0000036	year	Fibroblast
SRS5681809	GSM4173668	EFO:0000246	age	58	58	UO:0000036	year	Fibroblast
SRS5681810	GSM4173669	EFO:0000246	age	69	69	UO:0000036	year	Fibroblast
SRS5681811	GSM4173670	EFO:0000246	age	64	64	UO:0000036	year	Fibroblast
SRS5681812	GSM4173671	EFO:0000246	age	37	37	UO:0000036	year	Fibroblast
SRS5682336	GSM2873998	EFO:0000246	age	36	36	UO:0000036	year	Oligodendrocyte
SRS5682345	GSM2874007	EFO:0000246	age	76	76	UO:0000036	year	Oligodendrocyte
SRS5682350	GSM2874012	EFO:0000246	age	66	66	UO:0000036	year	Oligodendrocyte
SRS5682361	GSM2874023	EFO:0000246	age	75	75	UO:0000036	year	Brain
SRS5682387	GSM2873954	EFO:0000246	age	36	36	UO:0000036	year	Neuron
SRS5697355	GSM4182320	EFO:0000246	age	64	64	UO:0000036	year	Tongue
SRS5697356	GSM4182321	EFO:0000246	age	54	54	UO:0000036	year	Tongue
SRS5697358	GSM4182322	EFO:0000246	age	31	31	UO:0000036	year	Gingiva
SRS5697879	GSM4182739	EFO:0000246	age	56	56	UO:0000036	year	Shoulder Capsule
SRS5697880	GSM4182740	EFO:0000246	age	47	47	UO:0000036	year	Shoulder Capsule
SRS5697881	GSM4182741	EFO:0000246	age	42	42	UO:0000036	year	Shoulder Capsule
SRS5697882	GSM4182742	EFO:0000246	age	47	47	UO:0000036	year	Shoulder Capsule
SRS5697883	GSM4182743	EFO:0000246	age	59	59	UO:0000036	year	Shoulder Capsule
SRS5697884	GSM4182744	EFO:0000246	age	55	55	UO:0000036	year	Shoulder Capsule
SRS5697885	GSM4182745	EFO:0000246	age	65	65	UO:0000036	year	Shoulder Capsule
SRS5697886	GSM4182746	EFO:0000246	age	60	60	UO:0000036	year	Shoulder Capsule
SRS5697887	GSM4182747	EFO:0000246	age	31	31	UO:0000036	year	Shoulder Capsule
SRS5697888	GSM4182748	EFO:0000246	age	43	43	UO:0000036	year	Shoulder Capsule
SRS5697889	GSM4182749	EFO:0000246	age	61	61	UO:0000036	year	Shoulder Capsule
SRS5697890	GSM4182750	EFO:0000246	age	67	67	UO:0000036	year	Shoulder Capsule
SRS5697891	GSM4182751	EFO:0000246	age	68	68	UO:0000036	year	Shoulder Capsule
SRS5697892	GSM4182752	EFO:0000246	age	55	55	UO:0000036	year	Shoulder Capsule
SRS5697893	GSM4182753	EFO:0000246	age	49	49	UO:0000036	year	Shoulder Capsule
SRS5697894	GSM4182754	EFO:0000246	age	58	58	UO:0000036	year	Shoulder Capsule
SRS5697895	GSM4182755	EFO:0000246	age	50	50	UO:0000036	year	Shoulder Capsule
SRS5697896	GSM4182756	EFO:0000246	age	46	46	UO:0000036	year	Shoulder Capsule
SRS5697897	GSM4182757	EFO:0000246	age	34	34	UO:0000036	year	Shoulder Capsule
SRS5697898	GSM4182758	EFO:0000246	age	49	49	UO:0000036	year	Shoulder Capsule
SRS5697899	GSM4182759	EFO:0000246	age	57	57	UO:0000036	year	Shoulder Capsule
SRS5697900	GSM4182760	EFO:0000246	age	61	61	UO:0000036	year	Shoulder Capsule
SRS5697902	GSM4182762	EFO:0000246	age	22	22	UO:0000036	year	Shoulder Capsule
SRS5697903	GSM4182763	EFO:0000246	age	21	21	UO:0000036	year	Shoulder Capsule
SRS5697905	GSM4182765	EFO:0000246	age	28	28	UO:0000036	year	Shoulder Capsule
SRS5697906	GSM4182766	EFO:0000246	age	20	20	UO:0000036	year	Shoulder Capsule
SRS5697908	GSM4182768	EFO:0000246	age	21	21	UO:0000036	year	Shoulder Capsule
SRS5697910	GSM4182770	EFO:0000246	age	22	22	UO:0000036	year	Shoulder Capsule
SRS5697911	GSM4182771	EFO:0000246	age	30	30	UO:0000036	year	Shoulder Capsule
SRS5697912	GSM4182772	EFO:0000246	age	35	35	UO:0000036	year	Shoulder Capsule
SRS5697913	GSM4182773	EFO:0000246	age	22	22	UO:0000036	year	Shoulder Capsule
SRS5697914	GSM4182774	EFO:0000246	age	30	30	UO:0000036	year	Shoulder Capsule
SRS5697915	GSM4182775	EFO:0000246	age	24	24	UO:0000036	year	Shoulder Capsule
SRS5697916	GSM4182776	EFO:0000246	age	35	35	UO:0000036	year	Shoulder Capsule
SRS5697918	GSM4182778	EFO:0000246	age	28	28	UO:0000036	year	Shoulder Capsule
SRS5697919	GSM4182779	EFO:0000246	age	27	27	UO:0000036	year	Shoulder Capsule
SRS5697920	GSM4182780	EFO:0000246	age	20	20	UO:0000036	year	Shoulder Capsule
SRS5697922	GSM4182782	EFO:0000246	age	32	32	UO:0000036	year	Shoulder Capsule
SRS5697923	GSM4182783	EFO:0000246	age	27	27	UO:0000036	year	Shoulder Capsule
SRS5697924	GSM4182784	EFO:0000246	age	22	22	UO:0000036	year	Shoulder Capsule
SRS5697925	GSM4182785	EFO:0000246	age	21	21	UO:0000036	year	Shoulder Capsule
SRS5697926	GSM4182786	EFO:0000246	age	23	23	UO:0000036	year	Shoulder Capsule
SRS5703755	GSM4184967	EFO:0000246	age	56	56	UO:0000036	year	Liver
SRS5703756	GSM4184968	EFO:0000246	age	57	57	UO:0000036	year	Liver
SRS5703757	GSM4184969	EFO:0000246	age	50	50	UO:0000036	year	Liver
SRS5703758	GSM4184970	EFO:0000246	age	50	50	UO:0000036	year	Liver
SRS5703759	GSM4184971	EFO:0000246	age	51	51	UO:0000036	year	Liver
SRS5703760	GSM4184972	EFO:0000246	age	59	59	UO:0000036	year	Liver
SRS5703761	GSM4184973	EFO:0000246	age	39	39	UO:0000036	year	Liver
SRS5703762	GSM4184974	EFO:0000246	age	61	61	UO:0000036	year	Liver
SRS5703763	GSM4184975	EFO:0000246	age	52	52	UO:0000036	year	Liver
SRS5813427	GSM4215859	EFO:0000246	age	26	26	UO:0000036	year	Heart
SRS5813458	GSM4215986	EFO:0000246	age	49	49	UO:0000036	year	Heart
SRS5813460	GSM4215989	EFO:0000246	age	44	44	UO:0000036	year	Heart
SRS5813462	GSM4215991	EFO:0000246	age	66	66	UO:0000036	year	Heart
SRS5813464	GSM4215992	EFO:0000246	age	71	71	UO:0000036	year	Heart
SRS5813465	GSM4215994	EFO:0000246	age	59	59	UO:0000036	year	Heart
SRS5813469	GSM4215998	EFO:0000246	age	59	59	UO:0000036	year	Heart
SRS5813470	GSM4215999	EFO:0000246	age	65	65	UO:0000036	year	Heart
SRS5813472	GSM4216001	EFO:0000246	age	65	65	UO:0000036	year	Heart
SRS5813475	GSM4216004	EFO:0000246	age	69	69	UO:0000036	year	Heart
SRS5813476	GSM4216005	EFO:0000246	age	61	61	UO:0000036	year	Heart
SRS5813478	GSM4216008	EFO:0000246	age	33	33	UO:0000036	year	Heart
SRS5813479	GSM4216007	EFO:0000246	age	52	52	UO:0000036	year	Heart
SRS5813481	GSM4216009	EFO:0000246	age	51	51	UO:0000036	year	Heart
SRS5813482	GSM4216010	EFO:0000246	age	73	73	UO:0000036	year	Heart
SRS5813483	GSM4216012	EFO:0000246	age	68	68	UO:0000036	year	Heart
SRS5813484	GSM4216014	EFO:0000246	age	53	53	UO:0000036	year	Heart
SRS5813486	GSM4216015	EFO:0000246	age	65	65	UO:0000036	year	Heart
SRS5813487	GSM4216016	EFO:0000246	age	55	55	UO:0000036	year	Heart
SRS5813489	GSM4216017	EFO:0000246	age	80	80	UO:0000036	year	Heart
SRS5813490	GSM4216018	EFO:0000246	age	20	20	UO:0000036	year	Heart
SRS5813493	GSM4216021	EFO:0000246	age	61	61	UO:0000036	year	Heart
SRS5813494	GSM4216022	EFO:0000246	age	51	51	UO:0000036	year	Heart
SRS5813495	GSM4216024	EFO:0000246	age	65	65	UO:0000036	year	Heart
SRS5813496	GSM4216025	EFO:0000246	age	64	64	UO:0000036	year	Heart
SRS5813498	GSM4216027	EFO:0000246	age	56	56	UO:0000036	year	Heart
SRS5813499	GSM4216028	EFO:0000246	age	45	45	UO:0000036	year	Heart
SRS5813500	GSM4216029	EFO:0000246	age	61	61	UO:0000036	year	Heart
SRS5813501	GSM4216030	EFO:0000246	age	34	34	UO:0000036	year	Heart
SRS5813502	GSM4216031	EFO:0000246	age	24	24	UO:0000036	year	Heart
SRS5813503	GSM4216032	EFO:0000246	age	56	56	UO:0000036	year	Heart
SRS5813505	GSM4216035	EFO:0000246	age	37	37	UO:0000036	year	Heart
SRS5813506	GSM4216034	EFO:0000246	age	44	44	UO:0000036	year	Heart
SRS5813507	GSM4216036	EFO:0000246	age	57	57	UO:0000036	year	Heart
SRS5813509	GSM4216037	EFO:0000246	age	64	64	UO:0000036	year	Heart
SRS5813510	GSM4216039	EFO:0000246	age	46	46	UO:0000036	year	Heart
SRS5813512	GSM4216040	EFO:0000246	age	59	59	UO:0000036	year	Heart
SRS5813514	GSM4216042	EFO:0000246	age	52	52	UO:0000036	year	Heart
SRS5813515	GSM4216043	EFO:0000246	age	44	44	UO:0000036	year	Heart
SRS5813516	GSM4216045	EFO:0000246	age	42	42	UO:0000036	year	Heart
SRS5813518	GSM4216047	EFO:0000246	age	48	48	UO:0000036	year	Heart
SRS5813519	GSM4216048	EFO:0000246	age	67	67	UO:0000036	year	Heart
SRS5813520	GSM4216049	EFO:0000246	age	50	50	UO:0000036	year	Heart
SRS5813521	GSM4216050	EFO:0000246	age	56	56	UO:0000036	year	Heart
SRS5813524	GSM4216053	EFO:0000246	age	56	56	UO:0000036	year	Heart
SRS5813525	GSM4216054	EFO:0000246	age	62	62	UO:0000036	year	Heart
SRS5813527	GSM4216056	EFO:0000246	age	58	58	UO:0000036	year	Heart
SRS5813532	GSM4216061	EFO:0000246	age	56	56	UO:0000036	year	Heart
SRS5813534	GSM4216044	EFO:0000246	age	59	59	UO:0000036	year	Heart
SRS5813535	GSM4216063	EFO:0000246	age	78	78	UO:0000036	year	Heart
SRS5813540	GSM4216069	EFO:0000246	age	53	53	UO:0000036	year	Heart
SRS5813541	GSM4216070	EFO:0000246	age	57	57	UO:0000036	year	Heart
SRS5813546	GSM4216075	EFO:0000246	age	59	59	UO:0000036	year	Heart
SRS5813548	GSM4216077	EFO:0000246	age	56	56	UO:0000036	year	Heart
SRS5813552	GSM4216081	EFO:0000246	age	67	67	UO:0000036	year	Heart
SRS5813554	GSM4216082	EFO:0000246	age	53	53	UO:0000036	year	Heart
SRS5813555	GSM4216083	EFO:0000246	age	66	66	UO:0000036	year	Heart
SRS5813556	GSM4216084	EFO:0000246	age	58	58	UO:0000036	year	Heart
SRS5813557	GSM4216085	EFO:0000246	age	77	77	UO:0000036	year	Heart
SRS5813558	GSM4216086	EFO:0000246	age	74	74	UO:0000036	year	Heart
SRS5813559	GSM4216087	EFO:0000246	age	36	36	UO:0000036	year	Heart
SRS5813561	GSM4216090	EFO:0000246	age	68	68	UO:0000036	year	Heart
SRS5813564	GSM4216093	EFO:0000246	age	65	65	UO:0000036	year	Heart
SRS5813566	GSM4216094	EFO:0000246	age	51	51	UO:0000036	year	Heart
SRS5813567	GSM4216095	EFO:0000246	age	75	75	UO:0000036	year	Heart
SRS5813568	GSM4216097	EFO:0000246	age	52	52	UO:0000036	year	Heart
SRS5813569	GSM4216098	EFO:0000246	age	75	75	UO:0000036	year	Heart
SRS5813570	GSM4216099	EFO:0000246	age	51	51	UO:0000036	year	Heart
SRS5813571	GSM4216100	EFO:0000246	age	69	69	UO:0000036	year	Heart
SRS5813572	GSM4216101	EFO:0000246	age	56	56	UO:0000036	year	Heart
SRS5813573	GSM4216102	EFO:0000246	age	75	75	UO:0000036	year	Heart
SRS5813575	GSM4216089	EFO:0000246	age	57	57	UO:0000036	year	Heart
SRS5813576	GSM4216104	EFO:0000246	age	60	60	UO:0000036	year	Heart
SRS5813577	GSM4216105	EFO:0000246	age	41	41	UO:0000036	year	Heart
SRS5813578	GSM4216106	EFO:0000246	age	77	77	UO:0000036	year	Heart
SRS5813580	GSM4216108	EFO:0000246	age	59	59	UO:0000036	year	Heart
SRS5813585	GSM4216114	EFO:0000246	age	46	46	UO:0000036	year	Heart
SRS5813586	GSM4216115	EFO:0000246	age	38	38	UO:0000036	year	Heart
SRS5813587	GSM4216116	EFO:0000246	age	22	22	UO:0000036	year	Heart
SRS5813588	GSM4216109	EFO:0000246	age	44	44	UO:0000036	year	Heart
SRS5813590	GSM4216118	EFO:0000246	age	50	50	UO:0000036	year	Heart
SRS5813591	GSM4216119	EFO:0000246	age	51	51	UO:0000036	year	Heart
SRS5813592	GSM4216120	EFO:0000246	age	49	49	UO:0000036	year	Heart
SRS5813593	GSM4216122	EFO:0000246	age	74	74	UO:0000036	year	Heart
SRS5813594	GSM4216123	EFO:0000246	age	64	64	UO:0000036	year	Heart
SRS5813595	GSM4216124	EFO:0000246	age	58	58	UO:0000036	year	Heart
SRS5813600	GSM4216121	EFO:0000246	age	57	57	UO:0000036	year	Heart
SRS5813601	GSM4216129	EFO:0000246	age	57	57	UO:0000036	year	Heart
SRS5813603	GSM4216131	EFO:0000246	age	74	74	UO:0000036	year	Heart
SRS5813605	GSM4216132	EFO:0000246	age	53	53	UO:0000036	year	Heart
SRS5813606	GSM4216135	EFO:0000246	age	63	63	UO:0000036	year	Heart
SRS5813608	GSM4216134	EFO:0000246	age	47	47	UO:0000036	year	Heart
SRS5813609	GSM4216139	EFO:0000246	age	58	58	UO:0000036	year	Heart
SRS5813610	GSM4216138	EFO:0000246	age	83	83	UO:0000036	year	Heart
SRS5813612	GSM4216141	EFO:0000246	age	52	52	UO:0000036	year	Heart
SRS5813613	GSM4216142	EFO:0000246	age	55	55	UO:0000036	year	Heart
SRS5813615	GSM4216144	EFO:0000246	age	47	47	UO:0000036	year	Heart
SRS5813617	GSM4216146	EFO:0000246	age	76	76	UO:0000036	year	Heart
SRS5813618	GSM4216147	EFO:0000246	age	78	78	UO:0000036	year	Heart
SRS5813619	GSM4216136	EFO:0000246	age	71	71	UO:0000036	year	Heart
SRS5813620	GSM4216148	EFO:0000246	age	81	81	UO:0000036	year	Heart
SRS5813621	GSM4216149	EFO:0000246	age	71	71	UO:0000036	year	Heart
SRS5813622	GSM4216150	EFO:0000246	age	60	60	UO:0000036	year	Heart
SRS5813623	GSM4216151	EFO:0000246	age	53	53	UO:0000036	year	Heart
SRS5813624	GSM4216153	EFO:0000246	age	56	56	UO:0000036	year	Heart
SRS5813625	GSM4216154	EFO:0000246	age	25	25	UO:0000036	year	Heart
SRS5813629	GSM4216156	EFO:0000246	age	51	51	UO:0000036	year	Heart
SRS5813630	GSM4216152	EFO:0000246	age	73	73	UO:0000036	year	Heart
SRS5813632	GSM4216160	EFO:0000246	age	75	75	UO:0000036	year	Heart
SRS5813633	GSM4216161	EFO:0000246	age	54	54	UO:0000036	year	Heart
SRS5813634	GSM4216162	EFO:0000246	age	66	66	UO:0000036	year	Heart
SRS5813635	GSM4216163	EFO:0000246	age	65	65	UO:0000036	year	Heart
SRS5813640	GSM4216169	EFO:0000246	age	47	47	UO:0000036	year	Heart
SRS5813641	GSM4216164	EFO:0000246	age	52	52	UO:0000036	year	Heart
SRS5813642	GSM4216170	EFO:0000246	age	72	72	UO:0000036	year	Heart
SRS5813643	GSM4216171	EFO:0000246	age	69	69	UO:0000036	year	Heart
SRS5813644	GSM4216172	EFO:0000246	age	44	44	UO:0000036	year	Heart
SRS5813645	GSM4216173	EFO:0000246	age	62	62	UO:0000036	year	Heart
SRS5813646	GSM4216174	EFO:0000246	age	49	49	UO:0000036	year	Heart
SRS5813647	GSM4216175	EFO:0000246	age	57	57	UO:0000036	year	Heart
SRS5813648	GSM4216177	EFO:0000246	age	60	60	UO:0000036	year	Heart
SRS5813649	GSM4216178	EFO:0000246	age	65	65	UO:0000036	year	Heart
SRS5813650	GSM4216179	EFO:0000246	age	67	67	UO:0000036	year	Heart
SRS5813654	GSM4216176	EFO:0000246	age	58	58	UO:0000036	year	Heart
SRS5813656	GSM4216184	EFO:0000246	age	52	52	UO:0000036	year	Heart
SRS5813657	GSM4216185	EFO:0000246	age	35	35	UO:0000036	year	Heart
SRS5813658	GSM4216186	EFO:0000246	age	66	66	UO:0000036	year	Heart
SRS5813659	GSM4216187	EFO:0000246	age	58	58	UO:0000036	year	Heart
SRS5813661	GSM4216190	EFO:0000246	age	69	69	UO:0000036	year	Heart
SRS5813663	GSM4216192	EFO:0000246	age	69	69	UO:0000036	year	Heart
SRS5813665	GSM4216194	EFO:0000246	age	57	57	UO:0000036	year	Heart
SRS5813666	GSM4216195	EFO:0000246	age	40	40	UO:0000036	year	Heart
SRS5813667	GSM4216188	EFO:0000246	age	22	22	UO:0000036	year	Heart
SRS5813670	GSM4216198	EFO:0000246	age	51	51	UO:0000036	year	Heart
SRS5813672	GSM4216200	EFO:0000246	age	69	69	UO:0000036	year	Heart
SRS5813674	GSM4216205	EFO:0000246	age	63	63	UO:0000036	year	Heart
SRS5813679	GSM4216208	EFO:0000246	age	75	75	UO:0000036	year	Heart
SRS5813683	GSM4216211	EFO:0000246	age	54	54	UO:0000036	year	Heart
SRS5813684	GSM4216212	EFO:0000246	age	56	56	UO:0000036	year	Heart
SRS5813685	GSM4216213	EFO:0000246	age	62	62	UO:0000036	year	Heart
SRS5813686	GSM4216214	EFO:0000246	age	54	54	UO:0000036	year	Heart
SRS5813692	GSM4216224	EFO:0000246	age	62	62	UO:0000036	year	Heart
SRS5813694	GSM4216216	EFO:0000246	age	52	52	UO:0000036	year	Heart
SRS5813696	GSM4215861	EFO:0000246	age	59	59	UO:0000036	year	Heart
SRS5813697	GSM4215862	EFO:0000246	age	59	59	UO:0000036	year	Heart
SRS5813698	GSM4215863	EFO:0000246	age	50	50	UO:0000036	year	Heart
SRS5813699	GSM4215865	EFO:0000246	age	53	53	UO:0000036	year	Heart
SRS5813700	GSM4215866	EFO:0000246	age	62	62	UO:0000036	year	Heart
SRS5813703	GSM4215868	EFO:0000246	age	51	51	UO:0000036	year	Heart
SRS5813704	GSM4215870	EFO:0000246	age	54	54	UO:0000036	year	Heart
SRS5813705	GSM4215871	EFO:0000246	age	62	62	UO:0000036	year	Heart
SRS5813706	GSM4215872	EFO:0000246	age	75	75	UO:0000036	year	Heart
SRS5813707	GSM4215873	EFO:0000246	age	62	62	UO:0000036	year	Heart
SRS5813708	GSM4215874	EFO:0000246	age	58	58	UO:0000036	year	Heart
SRS5813709	GSM4215869	EFO:0000246	age	25	25	UO:0000036	year	Heart
SRS5813710	GSM4215875	EFO:0000246	age	33	33	UO:0000036	year	Heart
SRS5813711	GSM4215876	EFO:0000246	age	67	67	UO:0000036	year	Heart
SRS5813713	GSM4215877	EFO:0000246	age	58	58	UO:0000036	year	Heart
SRS5883570	GSM4232382	EFO:0000246	age	43	43	UO:0000036	year	Skin
SRS5883571	GSM4232383	EFO:0000246	age	31	31	UO:0000036	year	Skin
SRS5883572	GSM4232384	EFO:0000246	age	48	48	UO:0000036	year	Skin
SRS5883573	GSM4232385	EFO:0000246	age	30	30	UO:0000036	year	Skin
SRS5883574	GSM4232386	EFO:0000246	age	24	24	UO:0000036	year	Skin
SRS5963140	GSM4257058	EFO:0000246	age	57	57	UO:0000036	year	Liver
SRS5963141	GSM4257059	EFO:0000246	age	55	55	UO:0000036	year	Liver
SRS5963142	GSM4257060	EFO:0000246	age	61	61	UO:0000036	year	Liver
SRS5963143	GSM4257061	EFO:0000246	age	55	55	UO:0000036	year	Liver
SRS5963144	GSM4257062	EFO:0000246	age	27	27	UO:0000036	year	Liver
SRS641283	GSM1414929	EFO:0000246	age	30	30	UO:0000036	year	Brain
SRS641284	GSM1414930	EFO:0000246	age	30	30	UO:0000036	year	Brain
SRS641285	GSM1414931	EFO:0000246	age	30	30	UO:0000036	year	Brain
SRS641286	GSM1414932	EFO:0000246	age	30	30	UO:0000036	year	Brain
SRS641287	GSM1414933	EFO:0000246	age	30	30	UO:0000036	year	Brain
SRS641288	GSM1414934	EFO:0000246	age	30	30	UO:0000036	year	Brain
SRS641289	GSM1414935	EFO:0000246	age	30	30	UO:0000036	year	Brain
SRS641290	GSM1414936	EFO:0000246	age	30	30	UO:0000036	year	Brain
SRS641291	GSM1414937	EFO:0000246	age	30	30	UO:0000036	year	Brain
SRS641292	GSM1414938	EFO:0000246	age	30	30	UO:0000036	year	Brain
SRS641293	GSM1414939	EFO:0000246	age	42	42	UO:0000036	year	Brain
SRS641294	GSM1414940	EFO:0000246	age	42	42	UO:0000036	year	Brain
SRS641295	GSM1414941	EFO:0000246	age	42	42	UO:0000036	year	Brain
SRS641296	GSM1414942	EFO:0000246	age	42	42	UO:0000036	year	Brain
SRS641297	GSM1414943	EFO:0000246	age	42	42	UO:0000036	year	Brain
SRS641298	GSM1414944	EFO:0000246	age	42	42	UO:0000036	year	Brain
SRS641299	GSM1414945	EFO:0000246	age	42	42	UO:0000036	year	Brain
SRS641300	GSM1414947	EFO:0000246	age	42	42	UO:0000036	year	Brain
SRS641301	GSM1414946	EFO:0000246	age	42	42	UO:0000036	year	Brain
SRS641302	GSM1414948	EFO:0000246	age	42	42	UO:0000036	year	Brain
SRS641303	GSM1414949	EFO:0000246	age	33	33	UO:0000036	year	Brain
SRS641304	GSM1414950	EFO:0000246	age	33	33	UO:0000036	year	Brain
SRS641305	GSM1414951	EFO:0000246	age	33	33	UO:0000036	year	Brain
SRS641306	GSM1414952	EFO:0000246	age	33	33	UO:0000036	year	Brain
SRS641307	GSM1414953	EFO:0000246	age	33	33	UO:0000036	year	Brain
SRS641308	GSM1414954	EFO:0000246	age	33	33	UO:0000036	year	Brain
SRS641309	GSM1414955	EFO:0000246	age	33	33	UO:0000036	year	Brain
SRS641310	GSM1414956	EFO:0000246	age	33	33	UO:0000036	year	Brain
SRS641311	GSM1414958	EFO:0000246	age	33	33	UO:0000036	year	Brain
SRS641312	GSM1414959	EFO:0000246	age	33	33	UO:0000036	year	Brain
SRS641313	GSM1414960	EFO:0000246	age	49	49	UO:0000036	year	Brain
SRS641314	GSM1414961	EFO:0000246	age	49	49	UO:0000036	year	Brain
SRS641316	GSM1414963	EFO:0000246	age	49	49	UO:0000036	year	Brain
SRS641317	GSM1414964	EFO:0000246	age	49	49	UO:0000036	year	Brain
SRS641318	GSM1414965	EFO:0000246	age	49	49	UO:0000036	year	Brain
SRS641319	GSM1414957	EFO:0000246	age	33	33	UO:0000036	year	Brain
SRS641320	GSM1414966	EFO:0000246	age	49	49	UO:0000036	year	Brain
SRS641321	GSM1414967	EFO:0000246	age	49	49	UO:0000036	year	Brain
SRS641322	GSM1414968	EFO:0000246	age	49	49	UO:0000036	year	Brain
SRS641323	GSM1414969	EFO:0000246	age	49	49	UO:0000036	year	Brain
SRS641324	GSM1414970	EFO:0000246	age	48	48	UO:0000036	year	Brain
SRS641329	GSM1414975	EFO:0000246	age	48	48	UO:0000036	year	Brain
SRS641330	GSM1414976	EFO:0000246	age	48	48	UO:0000036	year	Brain
SRS641331	GSM1414977	EFO:0000246	age	48	48	UO:0000036	year	Brain
SRS641332	GSM1414978	EFO:0000246	age	48	48	UO:0000036	year	Brain
SRS641333	GSM1414979	EFO:0000246	age	48	48	UO:0000036	year	Brain
SRS641334	GSM1414980	EFO:0000246	age	48	48	UO:0000036	year	Brain
SRS738376	GSM1538069	EFO:0000246	age	34.9	34.9	UO:0000036	year	Liver
SRS738381	GSM1538074	EFO:0000246	age	26.9	26.9	UO:0000036	year	Liver
SRS738386	GSM1538079	EFO:0000246	age	23.4	23.4	UO:0000036	year	Liver
SRS738396	GSM1538089	EFO:0000246	age	22.2	22.2	UO:0000036	year	Liver
SRS738400	GSM1538093	EFO:0000246	age	28.3	28.3	UO:0000036	year	Liver
SRS738409	GSM1538102	EFO:0000246	age	30.7	30.7	UO:0000036	year	Liver
SRS778035	GSM1558068	EFO:0000246	age	62	62	UO:0000036	year	Bone Marrow
SRS778036	GSM1558069	EFO:0000246	age	51	51	UO:0000036	year	Bone Marrow
SRS778037	GSM1558070	EFO:0000246	age	38	38	UO:0000036	year	Bone Marrow
SRS778039	GSM1558071	EFO:0000246	age	75	75	UO:0000036	year	Bone Marrow
SRS782991	GSM1561390	EFO:0000246	age	26	26Y	UO:0000036	year	Mesothelial Cell
SRS782992	GSM1561391	EFO:0000246	age	26	26Y	UO:0000036	year	Mesothelial Cell
SRS782993	GSM1561392	EFO:0000246	age	26	26Y	UO:0000036	year	Mesothelial Cell
SRS782994	GSM1561393	EFO:0000246	age	26	26Y	UO:0000036	year	Mesothelial Cell
SRS782995	GSM1561394	EFO:0000246	age	58	58Y	UO:0000036	year	Mesothelial Cell
SRS782996	GSM1561395	EFO:0000246	age	58	58Y	UO:0000036	year	Mesothelial Cell
SRS823524	GSM1587300	EFO:0000246	age	38	38	UO:0000036	year	Endometrium
SRS823525	GSM1587301	EFO:0000246	age	40	40	UO:0000036	year	Endometrium
SRS823526	GSM1587303	EFO:0000246	age	32	32	UO:0000036	year	Endometrium
SRS823527	GSM1587302	EFO:0000246	age	31	31	UO:0000036	year	Endometrium
SRS823528	GSM1587304	EFO:0000246	age	44	44	UO:0000036	year	Endometrium
SRS823529	GSM1587305	EFO:0000246	age	37	37	UO:0000036	year	Endometrium
SRS823530	GSM1587306	EFO:0000246	age	40	40	UO:0000036	year	Endometrium
SRS823531	GSM1587307	EFO:0000246	age	38	38	UO:0000036	year	Endometrium
SRS823532	GSM1587308	EFO:0000246	age	31	31	UO:0000036	year	Endometrium
SRS823533	GSM1587309	EFO:0000246	age	35	35	UO:0000036	year	Endometrium
SRS823534	GSM1587310	EFO:0000246	age	38	38	UO:0000036	year	Endometrium
SRS823535	GSM1587311	EFO:0000246	age	38	38	UO:0000036	year	Endometrium
SRS823536	GSM1587313	EFO:0000246	age	40	40	UO:0000036	year	Endometrium
SRS823537	GSM1587312	EFO:0000246	age	38	38	UO:0000036	year	Endometrium
SRS823538	GSM1587314	EFO:0000246	age	38	38	UO:0000036	year	Endometrium
SRS823539	GSM1587315	EFO:0000246	age	36	36	UO:0000036	year	Endometrium
SRS823540	GSM1587316	EFO:0000246	age	39	39	UO:0000036	year	Endometrium
SRS823541	GSM1587317	EFO:0000246	age	39	39	UO:0000036	year	Endometrium
SRS823542	GSM1587318	EFO:0000246	age	31	31	UO:0000036	year	Endometrium
SRS823543	GSM1587319	EFO:0000246	age	38	38	UO:0000036	year	Endometrium
SRS877019	GSM1638214	EFO:0000246	age	74	74	UO:0000036	year	Epithelial Cell
SRS877020	GSM1638213	EFO:0000246	age	67	67	UO:0000036	year	Epithelial Cell
SRS877021	GSM1638212	EFO:0000246	age	62	62	UO:0000036	year	Epithelial Cell
SRS877022	GSM1638210	EFO:0000246	age	67	67	UO:0000036	year	Epithelial Cell
SRS877023	GSM1638211	EFO:0000246	age	74	74	UO:0000036	year	Epithelial Cell
SRS877024	GSM1638209	EFO:0000246	age	62	62	UO:0000036	year	Epithelial Cell
SRS882951	GSM1642814	EFO:0000246	age	68	68Y	UO:0000036	year	Epithelial Cell
