# Supplementary material for: REVIVE: a computational platform for systematically identifying rejuvenating chemical and genetic perturbations
Source: Aging (Albany NY). 2025 Nov 25;17(11):2844–58. doi: 10.18632/aging.206342 (PMC12705183; doi:10.18632/aging.206342)
Supplement: Supplementary Table 2 [file aging-17-11-206342-s003.xlsx]

## Sheet: Sheet1
Supplementary Table 2. Genes with non-zero coefficients in the transcriptional clock.
names	coefficients	standardized_coefficients
Intercept	-6.51516	1.44944
MAP1B	0.0143517	0.0180633
NME3	-0.0413895	-0.0255409
RPS27L	0.0255038	0.0112475
CLEC2D	-0.0349783	-0.0181157
SRRM3	0.00534151	0.00450346
CP	0.0259473	0.0316743
SIRPB1	-0.00193546	-0.00178957
PTCHD4	0.0454812	0.0442698
RGS5	0.00557976	0.00550869
MXRA7	0.0120049	0.00738426
TRGC1	-0.0282619	-0.0338534
SCG2	0.0150776	0.0166215
ZNF676	0.00818229	0.00717476
MGP	0.021549	0.0268313
RALYL	0.0330228	0.0262172
SPIB	-0.0711353	-0.0501247
LMO3	0.0453271	0.0473911
DLK1	0.020787	0.0262644
PCDHB16	0.0423566	0.0274425
EYA4	0.0262711	0.0293793
TIFAB	-0.0316283	-0.02936
CDH11	-0.00917969	-0.00820572
PHLDB1	0.0113609	0.00644613
SNAP25	0.0387096	0.039707
EDA2R	0.10932	0.095208
CDH5	0.00158088	0.00194384
PON3	0.0458237	0.0368839
CYP4X1	0.0265071	0.0235336
RUNX3	-0.00759285	-0.00711997
KCNT2	-0.0118854	-0.0100624
D2HGDH	-0.00740583	-0.00390398
EPHA7	0.0121678	0.0122101
LRP6	-0.0147079	-0.0103678
GATA5	0.0054698	0.00537269
KIF1B	0.0253939	0.00992168
FGR	-0.00999455	-0.00976567
WDR31	0.0518503	0.0247424
PCDHGA7	0.0348557	0.0262063
CA3	0.0112505	0.0116663
LINGO3	-0.0130787	-0.0115392
NAV3	0.0967287	0.061873
RGS11	0.00179471	0.00137605
CD79A	-0.00375137	-0.00374376
ROBO1	-0.0129184	-0.00957531
DIRAS3	0.0107365	0.0108333
FAM131C	0.007133	0.00634379
CPS1	0.0318466	0.0231464
DNAJC28	0.0422398	0.0218502
BRINP1	0.000330789	0.000326442
TRIM55	-0.0288149	-0.0360558
GYG2	0.00894275	0.00799622
SPRY1	0.0231425	0.0194677
SEZ6L2	0.00642213	0.00571249
FCRL6	0.0169787	0.0206898
HSD11B1	0.00875668	0.00994602
RGS10	-0.0314165	-0.0161401
PDGFRA	-0.0226434	-0.0194854
TCEAL2	0.0231055	0.0197945
CA5A	0.00139106	0.000643553
RALGDS	-0.0325757	-0.0141833
GJA5	0.00903755	0.00925782
SLC25A37	-0.0573548	-0.0296416
PLCD3	0.0258412	0.0124969
C1QTNF1	-0.0141679	-0.0132199
GFRA1	-0.00953044	-0.0112306
PDIA2	0.00525135	0.00433253
LGI3	-0.0217849	-0.0195622
KCNMB2	0.0311618	0.0266928
ARHGEF18	0.000184572	0.000107212
OXER1	-0.0546093	-0.0442327
ZNF208	0.0332115	0.0223596
PDE1A	-0.0149852	-0.0132162
KIF21B	-0.0561701	-0.0421623
SIK2	0.0484984	0.0197342
RPL6P27	0.0143648	0.0155926
NOS1AP	0.0207201	0.0143934
CAST	0.0357417	0.0109623
CD28	-0.000169181	-0.00012892
HAS2	-0.00726663	-0.00760297
LY86	-0.0125763	-0.00901404
NLGN4X	-0.041453	-0.0417827
SERPINF1	-0.0130163	-0.00959708
HAL	-0.00259048	-0.00260823
LRP10	-0.00382044	-0.00144154
LPL	0.00554599	0.00708106
PPM1E	-0.0167708	-0.0141735
DNAH17	-0.0329621	-0.0204035
LTK	-0.0149219	-0.0144186
PCDH1	0.0170284	0.0178613
TSPAN7	-8.98792e-06	-8.51718e-06
UNC5D	-0.00464109	-0.00391995
WDR18	0.135938	0.059445
VAX2	0.0157723	0.0113453
BCHE	-0.00313308	-0.00347887
SEMA3A	0.00770103	0.00786145
HCAR3	-0.00226794	-0.00240966
SSPN	-0.0071478	-0.0052822
PCCA	0.0191128	0.00923248
LDB2	-0.0314578	-0.0308715
IRS1	-0.0558162	-0.0383517
MXD1	-0.0227661	-0.0116016
TMEM45A	0.0616331	0.0262963
PCDHA10	0.0263752	0.0133089
GAP43	-0.0219796	-0.0212367
ADGRG6	-0.0051918	-0.00472542
MUC6	0.00595014	0.00566685
PPP1R13L	0.000774242	0.00042148
MUC13	0.00181867	0.00170172
ATP6V1B1	-0.00451701	-0.0044104
TMEM200B	-0.0268104	-0.0213004
ENHO	0.00816155	0.0077909
RGS2	-0.0438376	-0.0302438
SRGN	-0.0312268	-0.023597
RNF128	0.0378418	0.0400991
UBL7	-0.0238676	-0.00842625
PCK1	0.0093938	0.0106327
WWC1	0.000802395	0.000605367
TMEM130	0.00703322	0.00467199
ATF4	-0.0733467	-0.0242712
CYS1	-0.00349164	-0.00312068
FGD6	-0.0248587	-0.0136565
LAPTM4A	0.129892	0.0482698
ZNF710	-0.00651122	-0.00365308
KLRF1	0.0189466	0.0196511
CCDC142	0.0121752	0.00573377
PEG10	-0.0186337	-0.0176889
TNFRSF11B	-0.0148999	-0.0166465
KRT16	-0.00187822	-0.00190261
CD69	0.0149645	0.012957
RAVER2	0.00286729	0.00226854
FRRS1L	0.0726449	0.0369381
PTH1R	0.0257155	0.0214812
SHH	0.0252897	0.0185982
TRIM58	-0.00529542	-0.00452744
GDF6	-0.0138174	-0.0129699
CFTR	0.0147422	0.0131704
A1BG	-0.0326396	-0.0150453
ZNF385D	-0.00783527	-0.00600285
SIX4	-0.00247186	-0.00177392
CCL13	0.0338969	0.0314886
MTND6P4	0.0264576	0.027313
SLC22A18	0.00128253	0.000862886
SERPINE1	-0.0165191	-0.0174424
PCDHGB5	0.0108997	0.00838839
BICDL2	-0.0139757	-0.0104165
CAPZB	-0.106925	-0.0267334
TEX9	-0.091272	-0.0382041
ITGA2B	0.00434005	0.0034856
GSTM5	0.0149114	0.0138383
MN1	-0.00723043	-0.00616194
ALG12	-0.0974627	-0.0389046
ITGB4	0.0227512	0.0178633
B3GALT4	-0.0147027	-0.00796717
FAM162B	-0.00642817	-0.00500413
GSTM3	0.0260321	0.0171799
AHNAK2	-0.0290285	-0.0242252
PIP5KL1	-0.023054	-0.0143795
EVI5	0.0196034	0.00853191
SGPP2	0.00509388	0.00381528
SAMD11	-0.00183694	-0.00174041
XPNPEP3	0.193466	0.0628421
SLC12A5	0.000390822	0.000271235
MAP7	0.00207637	0.00159548
PGF	-0.0242764	-0.0220272
GCNT2	-0.00650572	-0.00402207
AKAP8L	-0.0633688	-0.0185905
PCDHGA12	-0.0327416	-0.0251322
SATB2	0.0224958	0.0121003
ANGPT2	0.0351294	0.0266602
WFS1	0.00927004	0.00557507
SLC14A1	0.027179	0.0247711
SEMA3E	0.0234913	0.0228835
CCR5	0.0018359	0.00189431
THNSL2	-0.00140691	-0.00125019
GPC2	-0.0496047	-0.0248431
SH3KBP1	0.0760668	0.0324825
ADAMTS7P3	-0.0109484	-0.00815472
LYPD6	-0.0468134	-0.0397277
PHOSPHO2	0.0667987	0.0398007
PLCL1	0.0236218	0.0176917
NRG1	0.0128982	0.0125293
ETV4	-0.000540935	-0.000442554
SLC8A2	-0.0286686	-0.021736
PI15	-0.00744632	-0.00855182
HAUS5	0.00248486	0.00112054
PDZD8	0.0144477	0.00667968
PROX2	0.00279767	0.00174809
CYP26B1	0.00865456	0.00779386
KCND2	0.0176941	0.0152431
EMILIN3	0.0160912	0.0123883
PCDHA2	0.00811925	0.00574738
CD163L1	-0.041205	-0.0387268
SAP30	-0.0346925	-0.0174937
SLC6A19	0.00928489	0.00720875
PCDHGB6	-0.0273791	-0.015817
SNX15	0.0215015	0.00916909
GPI	0.0871595	0.0267727
CEP170B	0.0306963	0.0161056
DIP2A	-0.059018	-0.0231757
SFRP4	0.0114269	0.0124358
NPY	0.00955089	0.00775581
TLR4	0.0476112	0.040664
UPK3BP1	-0.00151494	-0.00100835
RABGGTA	-0.0444441	-0.0177666
NPIPB11	0.00432287	0.00268734
CLDN23	-0.00364151	-0.002908
FKBP5	0.0350137	0.0247508
FOXRED2	0.0530716	0.022917
PHLPP2	0.0234899	0.00844036
RRP15	-0.0209734	-0.00819494
ZMAT3	0.0319525	0.0142372
PRKAG2	0.0121919	0.00573266
HLA-DRB1	0.0106201	0.0104766
SP140L	0.0178434	0.00701309
MYPN	-0.0035996	-0.00376648
CRACR2A	0.0228441	0.0130211
SNX24	-0.00849534	-0.00480103
CABYR	0.0544089	0.0303226
MICU3	-0.00950644	-0.00696476
MAPK15	-0.00406396	-0.00355725
OLFM1	-0.00304413	-0.00252319
BLOC1S2	0.0870607	0.0264012
HOXD9	0.0148086	0.0130371
GDAP1	-0.0381674	-0.0230202
IGHM	-0.0248517	-0.0296239
NOC2LP1	-0.030822	-0.0273666
KLHL11	0.017706	0.0116669
HYDIN	0.00233705	0.00159757
KSR1	0.0129408	0.0061732
FAXC	-0.100385	-0.0607402
MILR1	0.00326327	0.00213664
YTHDF2	0.0342133	0.00909462
TMEM35B	-0.0175388	-0.00955129
CHRNA4	-0.00981816	-0.00741903
CABLES1	0.00221044	0.00180592
KRT7	0.00583179	0.00674533
IGKJ1	-0.0141024	-0.009694
PRR3	-0.153233	-0.0578445
BMP3	0.00672849	0.00649877
TACSTD2	-0.00575696	-0.0067138
IVNS1ABP	-0.116182	-0.0443358
ZBED3	-0.0780794	-0.0502825
PLA2G2D	-0.035835	-0.0233359
JAKMIP1	0.0161989	0.014099
COL5A2	-0.0212328	-0.0176832
TAB3	0.0155886	0.00596695
RPL35	0.102745	0.0335959
ADAP2	-0.0537947	-0.0365072
P2RX1	0.00415573	0.00397705
SOCS2	-0.0114036	-0.00835129
SNX8	-0.0563589	-0.0301703
TMEM63C	0.0473375	0.04403
IFITM10	-0.0409677	-0.0365692
PRUNE2	0.0267236	0.0242672
E2F1	0.00182928	0.00122942
LY6D	0.0105277	0.0078949
DLX6	0.0320349	0.0244132
PTGFR	0.00164454	0.00130332
ABCB5	0.0326878	0.0217462
RGS8	-0.00499478	-0.00338466
SFRP2	0.0050228	0.00556965
LRP1B	0.00477199	0.00428865
CUL3	0.0391477	0.0101509
KLHDC8A	0.00133937	0.00107306
PSMG1	0.0413961	0.0173003
TMEM39B	0.0954313	0.0330884
ADGRB1	-0.0231838	-0.0170623
FAM167B	0.00393895	0.00286798
BICD1	-0.0262408	-0.0127322
MSH5	0.028966	0.0146734
WDR27	0.0135141	0.00568664
NLGN2	-0.0179553	-0.00840757
CWF19L2	-0.0125444	-0.00435635
MCF2	0.0199685	0.0152612
VCL	-0.0299222	-0.0162378
CXCR6	-0.00978071	-0.00833489
SNIP1	0.0272912	0.00897565
FAM81A	0.00323289	0.00221647
STX1A	-0.00543826	-0.00341556
ITPK1	0.035619	0.0152305
MYCT1	-0.0138732	-0.0114824
CARMIL3	0.0169847	0.0112295
CXCL9	0.00518495	0.00531719
NAALAD2	0.0116945	0.00680296
ECHDC3	-0.00952007	-0.00778961
IFITM3	0.0286609	0.0158846
IL3RA	-0.00227245	-0.00165681
DYNLT3	0.054931	0.0226835
DPP4	0.00310869	0.00306534
ELMO3	0.00255477	0.0015713
REC8	0.0016725	0.00117471
EHD4	-0.00978915	-0.00422042
OSM	0.000695306	0.000628836
RAB3IL1	0.00126564	0.000838848
GINS3	0.00599507	0.00259483
RPP25L	-0.00814897	-0.00368081
MEST	0.00907741	0.00810344
TNFAIP8	-0.0454752	-0.0196553
TNMD	0.00326725	0.00271804
MS4A14	0.00141118	0.00114822
DHCR24	-0.0154627	-0.011979
ELOVL7	0.0565776	0.0373842
CBX2	-0.00792167	-0.00511017
DXO	-0.0916529	-0.0356288
INO80B	-0.0347105	-0.0149913
PCSK4	0.00299581	0.00202615
ESR1	0.0295693	0.0237205
ABRACL	0.0350362	0.0188435
MBOAT1	-0.000933554	-0.000704394
JKAMP	0.0348582	0.0103669
HOXA1	0.00530223	0.00460424
RTN4RL1	0.0064996	0.00536916
BRIP1	0.0208499	0.00957448
ZSWIM1	0.0169762	0.00658584
DLK2	0.00208952	0.00140804
PAAF1	0.0620004	0.0186794
JUN	-0.0013128	-0.000845663
CHD5	0.00816053	0.00540573
SRSF3	0.13344	0.030546
PTPN4	-0.115347	-0.0374624
RGS1	0.0197813	0.0187164
ZNF544	0.0512712	0.0153493
RANBP17	-0.0986429	-0.0607785
DLGAP1	-0.0122416	-0.00995621
OR7E12P	-0.0137041	-0.00940204
TIPARP	-0.0294318	-0.0154514
CXCL14	0.00422674	0.00437061
KLKB1	0.0100062	0.00761259
RPL4P4	0.0182073	0.0118142
CYP1B1	-0.00741198	-0.00769514
IGIP	0.0187668	0.00900794
GDPGP1	0.00444155	0.00151212
GRINA	0.0351775	0.0134011
SLC9A6	0.0157442	0.00664703
GPAM	-0.00461299	-0.00337782
XKR4	0.000841694	0.000412757
RHOC	0.111808	0.047433
LHX6	-0.0221336	-0.0173132
PODNL1	0.00557009	0.00335854
POLR1A	0.0362028	0.0131677
ANKRD53	-0.0172057	-0.0132679
PLIN2	-0.0335239	-0.0194854
FABP6	-0.00747235	-0.00575521
CHD7	-0.0182916	-0.00875865
TMOD4	0.00854165	0.00722612
ACE	0.0304318	0.0231721
MTERF3	-0.0037252	-0.00158496
EGR3	-0.00651077	-0.00617552
ILDR1	0.0288213	0.0178109
DISP3	0.0215831	0.0162575
NPIPB6	-0.000680815	-0.000738401
LRRC34	0.0253521	0.0104829
CACNA2D2	0.0780193	0.046387
BOLA2	-0.0219627	-0.0107263
MMP12	0.000110698	0.000117567
MSRA	0.0205816	0.00914998
PIANP	-0.0038807	-0.00323697
PIK3R1	0.03763	0.0169256
CLEC3B	-0.0149105	-0.0116982
WSB1	0.031407	0.0105001
F11R	-0.0171865	-0.00792563
KCNMB4	-0.0217529	-0.0130294
EIF4G2	-0.0471272	-0.0106724
OGDH	0.0158384	0.00662011
CLEC2B	-0.047903	-0.0282872
THYN1	0.169483	0.0479941
CSMD3	-0.0105529	-0.00521804
GALR1	0.0248801	0.0101094
AVPI1	0.0345914	0.0202991
CPM	-0.00781215	-0.00501401
DUXAP8	0.0431539	0.0375996
STYX	-0.0389937	-0.0147745
PKD1L3	-0.00149389	-0.00109771
ETV7	-0.0121212	-0.0103836
SNN	0.0761764	0.036367
UBE2Q1	0.0280919	0.00765533
TMEM65	-0.040369	-0.0160569
RUNX1	0.0215393	0.0116153
KEL	-0.000708782	-0.000589275
TBC1D30	0.0341205	0.0207302
TNFAIP3	0.0389887	0.0190144
MYRF	0.00652425	0.00524389
ATAD3C	-0.0069979	-0.00309345
TNFRSF10B	0.0259941	0.0111106
LRSAM1	0.0217503	0.00883601
STMN1	-0.0663938	-0.0255391
CSF1	-0.00387309	-0.00261162
ZNF107	-0.0112535	-0.00480953
ANKRD52	-0.00493988	-0.00215945
SCNN1A	-0.01176	-0.00686284
SCN8A	0.00815619	0.00561555
TMEM169	-0.04768	-0.025579
JAG2	0.00252795	0.00192104
GTF2E1	0.000849286	0.000390628
DGKB	0.0306763	0.018318
PRLR	-0.00553643	-0.00434829
GOLGA8M	0.020364	0.016465
HSF4	0.0413901	0.0254986
ASIC3	-0.00131299	-0.000751826
SCN4A	-0.00833877	-0.006802
ENTPD7	0.0350571	0.0176783
JMJD6	0.00636935	0.00183735
CENPV	-0.0387689	-0.0169274
PRG4	0.0145417	0.01742
MANEAL	0.0780331	0.0516663
CLEC5A	0.0196687	0.0166244
CEP152	0.0413808	0.0164547
MAPK8IP2	0.0164243	0.00794163
EGFL8	0.017474	0.00868779
LEAP2	-0.0353793	-0.019519
RAB8B	0.0160287	0.00650161
FGFR4	0.0121876	0.00849388
MICALL2	0.0264652	0.0152767
CAMK2A	-0.016745	-0.0132964
SCAI	-0.0619667	-0.0202764
KLHDC3	-0.00550424	-0.00191023
EXOSC4	0.00320209	0.00148919
OTUD6A	-0.0259997	-0.0134627
ZNF726	-0.0412609	-0.0177415
RPL23AP1	-0.00512242	-0.00411253
RHAG	-0.00423933	-0.00300298
LDOC1	0.0360034	0.0251341
SHROOM1	-0.0245245	-0.0136243
TPST1	0.0267167	0.0183534
HSPBAP1	0.0937466	0.0315686
FAM228A	-0.00237744	-0.00171302
LDLRAD1	0.00731203	0.00468426
GABRA4	-0.00692621	-0.00549171
WDPCP	-0.0552986	-0.01766
ZNF506	0.00282094	0.000764335
ISG20L2	-0.0383123	-0.0122936
BMP8B	-0.00275202	-0.00153664
UNG	0.0237912	0.00980398
LANCL1	-0.0501638	-0.0212042
RACGAP1	-0.0255155	-0.0124782
CILP	0.00413984	0.00407514
STAMBPL1	0.0352892	0.0158969
HOXB4	-0.0190698	-0.0160905
MT1H	0.00198544	0.00199376
CCDC148	-0.0623341	-0.030532
AKR7A3	-0.059046	-0.0390051
NXPH4	0.00221786	0.00189029
IGHV1-2	0.00612308	0.00567261
PPP1R15A	0.0240831	0.00962942
CEP95	0.0598546	0.0203432
AASDHPPT	-0.0640061	-0.0228563
STK24	0.0290679	0.00886397
ZNF821	0.0236084	0.00915165
PDSS1	0.01923	0.0101667
SLC2A5	0.00565474	0.00394782
SLC35A5	0.0896555	0.0346779
UQCRC1	-0.0429818	-0.0115897
PHPT1	0.0519571	0.0181528
EPHA6	0.0148569	0.011345
UBAP1L	0.0146552	0.00679251
GOLGA8N	0.0260928	0.0139563
NYAP2	0.00494797	0.00304122
RAD51AP1	-0.0178443	-0.0108875
IQGAP1	0.0319892	0.0102217
ADAMTS14	0.0175404	0.0170503
AGAP9	-0.0771447	-0.0636592
IGHA2	0.00390114	0.00454917
HAPLN1	-0.00239764	-0.00239037
MUC16	-0.0141736	-0.0184299
INSIG1	-0.0120161	-0.006376
LMX1A	0.00752754	0.00488616
NPHP3	0.0587239	0.0183924
HES7	-0.0134858	-0.00871585
ST3GAL3	0.0415941	0.0213496
PUDP	-0.00378928	-0.00215612
ZNF184	0.0132924	0.00606337
MIA	-0.0225148	-0.0180043
ADGRV1	-0.0353259	-0.0219558
ZFHX2	-0.00221093	-0.00131972
NEFL	0.0285106	0.0332888
CYB561	0.00609987	0.00346694
STK16	-0.0666894	-0.0272742
CYP4F32P	0.0204178	0.0111552
RAP1GAP2	-0.00118778	-0.000842567
TIPRL	-0.0507114	-0.0160765
ADAD2	-0.00715817	-0.00576782
TRPV6	-0.00682172	-0.00521195
LANCL3	0.0318566	0.0239802
DOLPP1	0.0236858	0.0123318
TRIB1	-0.0186983	-0.0122653
FAM13B	0.0283457	0.0118952
CHEK1	0.00207314	0.000753948
SFTPD	0.0436485	0.0339121
WNT16	-0.00327547	-0.00304114
ZFR2	0.0206413	0.0117005
BCAS1	0.0145004	0.0136474
FOXO1	-0.0362839	-0.0150881
PDGFB	0.0244282	0.0233827
PRSS12	-0.00924887	-0.00789851
GLDC	-0.00837321	-0.00780207
UPP1	0.0380397	0.0174591
KCNJ16	0.0145475	0.010147
PTPRS	-0.0411431	-0.0194765
AKAP8	0.0420407	0.0137851
CRKL	0.0142852	0.0042096
ZNF284	0.00626176	0.00228562
PLLP	-0.00346208	-0.00259147
IGKV4-1	-0.0283583	-0.0274645
RUVBL1	-0.00427845	-0.00150034
CNTNAP1	-0.00202832	-0.0011535
HKDC1	0.000345131	0.000331455
CCDC74B	-0.0599832	-0.0391118
MTCO1P40	0.00267509	0.00340086
NAT1	0.0151076	0.00840731
CGB7	0.00736261	0.00514624
TLE2	0.000985759	0.000653528
RGS3	-0.0486551	-0.0240027
FAAH2	-0.00606912	-0.00427716
IER5	0.0794054	0.0278076
BHLHA15	0.000855351	0.000637834
NOP16	-0.0873306	-0.0298963
TRIM7	-0.0114248	-0.00580882
MKRN1	-0.0481986	-0.0131828
LPAR6	-0.141862	-0.0688897
GLS2	0.0145228	0.0112281
FAM90A1	0.00529824	0.00349294
DMRT2	0.0139144	0.0125581
KLF17	0.0115349	0.00768115
EMX2	0.0106381	0.00859655
GREM1	0.00529754	0.00433525
IL1R2	-0.0097693	-0.00952489
ZNF518B	-0.113202	-0.0579199
KIF23	-0.0136987	-0.00673635
KCNE5	0.00187379	0.00139402
LRRC70	0.0134507	0.0111785
ZNF431	0.134585	0.0388238
L3MBTL4	0.0598915	0.0326177
GGCT	-0.0194333	-0.0102435
KLHDC8B	-0.0199259	-0.011716
FBXL13	0.0327239	0.0216621
IGHG4	0.00358936	0.00431857
GNG4	-0.0130654	-0.00876023
RPL10AP6	-0.0159838	-0.00953237
ZNF439	0.0528275	0.0247074
CCL22	0.0302276	0.0224746
TMEM45B	0.00533347	0.00385738
TMEM52	-0.00722424	-0.00566743
QRFP	-0.0138841	-0.00871224
SLC47A1	-0.00615344	-0.00419498
RAP1GDS1	-0.00841397	-0.00287603
MAGIX	-0.0189351	-0.0102543
NSUN2	0.0703487	0.0267469
MTND4P12	-0.0066833	-0.00896064
MYH3	0.00774999	0.0048242
GPR61	-0.00271521	-0.00194884
LRFN3	0.000580904	0.000252223
OBSCN	-0.0108946	-0.00675626
WIF1	-0.0476417	-0.0486773
XPNPEP2	-0.00368989	-0.00382055
TMEM138	0.0434411	0.013285
DTL	-0.0234346	-0.0171128
RYR1	-0.0134652	-0.0100536
FAH	-0.0272053	-0.0111389
BAIAP2L2	0.0412053	0.027403
PHGDH	-0.0100736	-0.00730189
COMP	0.00181862	0.00186386
FIZ1	-0.0116854	-0.00516166
KLK7	0.00343008	0.00308834
EVC2	-0.00767336	-0.00598392
HECW1	0.0367838	0.0235939
SQSTM1	-0.0517705	-0.0153838
SLC26A5	0.0155369	0.0107766
LAMP3	0.0091273	0.00706434
MYCBP	0.0480662	0.0181346
FGF13	0.0134471	0.00598501
FRG1CP	-0.016057	-0.0123492
MTCYBP18	0.0137819	0.0123097
CLDN18	0.00401548	0.00265369
AEN	0.0522706	0.0259097
CACNA1H	0.00955717	0.00899746
NT5C3A	-0.0073058	-0.00276973
TMIGD3	0.0174393	0.0152545
KCNK2	-0.00527722	-0.0039541
MORC4	-0.0587538	-0.0206755
MAN2A2	0.0832017	0.0320642
MFSD2A	0.0424338	0.0357599
GPR20	0.0392567	0.0289385
NEFH	-0.043172	-0.0357903
PDK2	0.0935547	0.0397289
GTF2IRD2	-0.0851215	-0.0277327
CPA3	-0.00414714	-0.00365512
ATP2C2	-0.0120626	-0.0086737
LRRC37A	-0.00378529	-0.00412212
NETO2	-0.0741421	-0.0462103
PKP3	0.00333899	0.00283931
ABCA13	-0.00307341	-0.00218902
PINLYP	-0.0635449	-0.0283799
KLHL33	-0.00417625	-0.00210218
MOV10L1	-0.0516959	-0.0383311
ADAMTS6	-0.00725185	-0.00517394
FBXO43	0.0125937	0.00776496
APOC1	-0.000778955	-0.000670152
KCTD11	-0.00826364	-0.00394088
ARID3C	0.000736885	0.000427642
BEST1	0.0165682	0.00783758
LYPD3	-0.050263	-0.0441326
IQCG	0.0802585	0.0320518
TBX6	0.00136082	0.00061792
RNF157	0.0474898	0.0292222
KLF12	-0.0194806	-0.00811421
TRIP6	0.0301102	0.0146495
RBP5	0.00277561	0.00188406
SYCE1L	-0.00961705	-0.00632529
UFSP1	0.0489235	0.0283859
DEGS1	0.0418233	0.0132789
CDKN2A	0.0380591	0.0320616
TRPC6	0.00753333	0.00629807
SLC35B2	-0.0251065	-0.00843285
ARL8A	0.00121927	0.00040196
ZBTB25	0.0650475	0.0181187
FA2H	-0.00223523	-0.00170546
IL34	0.0314097	0.0205519
CAPN11	-0.00110448	-0.000802398
PLEKHG5	0.0147674	0.00859721
SYT10	0.0224586	0.0144931
BOK	0.0295132	0.0200251
MOCS3	0.0553508	0.019874
IFRD1	-0.0613036	-0.0231128
NT5E	-0.0424244	-0.0314331
ST14	-0.00668427	-0.00506253
ATP1A4	0.0118092	0.00621087
NHLRC1	-0.0470584	-0.0316744
CDIP1	0.00115542	0.000604771
HELLS	0.0487008	0.0207538
PRPF38B	-0.136302	-0.0346644
ZNF853	-0.0147105	-0.00968837
CES4A	-0.016713	-0.00898427
MARVELD1	0.00780764	0.0042938
PER1	-0.00550297	-0.00287251
DIAPH2	-0.0138283	-0.00673719
FAM83H	-0.013355	-0.0071645
EIF4A1	-0.0161852	-0.00411406
FGF5	-0.0186256	-0.0115596
NAT14	-0.0498352	-0.0244532
CD40	0.0199278	0.0129221
DNAH9	0.0194061	0.011408
ERICH4	-0.0256767	-0.0146906
CENPI	-0.00547798	-0.00251756
ANKAR	0.011366	0.00547619
LRRC37A17P	0.0336598	0.015106
IGLV1-40	-0.0128301	-0.0125264
EID2B	0.00698872	0.00305467
MAP1LC3A	-0.0177033	-0.0100671
BCAT2	-0.029798	-0.0118245
GRIN3A	-0.00898824	-0.00601157
ZMYM5	-0.0681235	-0.0240002
IFT80	-0.00933292	-0.0037454
PHLPP1	-0.0202095	-0.00698077
CYSLTR2	0.000606072	0.000387243
KIAA0753	-0.0226206	-0.0129164
PSD2	-0.00737174	-0.00478945
ZNF487	0.0146468	0.00559788
MLLT3	-0.0423511	-0.0165141
SDHD	-0.0627837	-0.0204392
NUP88	-0.0347295	-0.00925036
NBPF3	0.0764876	0.0341565
NYAP1	0.0121529	0.00707999
ARHGAP20	0.00991491	0.0070133
UGT8	-0.00349095	-0.0023059
CTSG	0.00925674	0.00741708
ARHGEF5	0.00856038	0.00507801
PI16	0.0303607	0.0266451
GRIK1	0.00707573	0.00468435
