# Supplementary material for: REVIVE: a computational platform for systematically identifying rejuvenating chemical and genetic perturbations
Source: Aging (Albany NY). 2025 Nov 25;17(11):2844–58. doi: 10.18632/aging.206342 (PMC12705183; doi:10.18632/aging.206342)
Supplement: Supplementary Table 3 [file aging-17-11-206342-s004.xlsx]

## Sheet: Sheet1
Supplementary Table 3. Gene Ontology enrichment of genes with non-zero coefficients in the transcriptional clock.
geneSet	link	size	overlap	expect	enrichmentRatio	pValue	FDR	overlapId	userId
Negative Regulation of Cell Migration (GO:0030336)		178	19	6.86098	2.76928	5.73828e-05	0.108665	225689;10221;2258;6469;6423;57413;575;7414;1009;6091;8428;1545;5054;3868;8819;286205;4070;89795;138429	NAV3;SCAI;SHH;SAP30;SERPINE1;ADGRB1;VCL;TMIGD3;PIP5KL1;TRIB1;ROBO1;STK24;CDH11;CYP1B1;TACSTD2;FGF13;SFRP2;MAPK15;KRT16
Negative Regulation of Cell Motility (GO:2000146)		135	16	5.20356	3.07482	6.27216e-05	0.108665	225689;6469;6423;57413;7414;1009;6091;8428;1545;5054;3868;8819;286205;4070;89795;138429	NAV3;SCAI;SHH;SAP30;SERPINE1;VCL;TMIGD3;PIP5KL1;ROBO1;STK24;CDH11;CYP1B1;TACSTD2;SFRP2;MAPK15;KRT16
Cell Migration Involved in Sprouting Angiogenesis (GO:0002042)		21	6	0.809442	7.41251	0.000105383	0.121717	2258;1003;6091;1960;30844;26585	ROBO1;EGR3;FGF13;GREM1;EHD4;CDH5
Regulation of Cell Migration (GO:0030334)		458	34	17.6535	1.92596	0.000197789	0.137068	225689;2268;815;2258;6469;6423;389;57413;7414;1009;1003;2651;1636;6367;6357;6091;8428;1545;10371;9723;3037;5156;5155;1435;2250;7205;5054;9079;3868;8819;286205;89795;138429;286077	NAV3;RHOC;CCL13;LDB2;PDGFB;ACE;SEMA3E;CCL22;SCAI;PDGFRA;SHH;SAP30;SERPINE1;VCL;TMIGD3;TRIP6;PIP5KL1;CAMK2A;FGF5;FGR;ROBO1;STK24;CDH11;SEMA3A;CYP1B1;HAS2;FAM83H;FGF13;SFRP2;GCNT2;MAPK15;CSF1;CDH5;KRT16
Regulation of Smooth Muscle Cell Apoptotic Process (GO:0034391)		15	5	0.578173	8.64793	0.000181719	0.137068	2308;2099;1029;4040;27076	LYPD3;CDKN2A;ESR1;FOXO1;LRP6
Sprouting Angiogenesis (GO:0002040)		57	9	2.19706	4.09639	0.000302413	0.149695	2258;23210;1003;6091;9723;1960;30844;26585;5228	SEMA3E;PGF;ROBO1;EGR3;FGF13;GREM1;EHD4;CDH5;JMJD6
Blood Vessel Endothelial Cell Migration (GO:0043534)		25	6	0.963621	6.22651	0.000301599	0.149695	2258;1003;6091;1960;30844;26585	ROBO1;EGR3;FGF13;GREM1;EHD4;CDH5
Myelination (GO:0042552)		48	8	1.85015	4.32397	0.000446729	0.19349	8506;6334;57211;8560;745;51090;83742;8537	BCAS1;DEGS1;SCN8A;MYRF;ADGRG6;MARVELD1;PLLP;CNTNAP1
Response to Fatty Acid (GO:0070542)		20	5	0.770897	6.48595	0.000799551	0.307827	2308;4023;3667;286676;2731	IRS1;ILDR1;FOXO1;GLDC;LPL
Calcium Ion Transport (GO:0006816)		123	13	4.74102	2.74203	0.000910287	0.315414	1137;8912;815;1234;84766;55503;9914;6543;6261;7225;5023;342372;116443	SLC8A2;CAMK2A;CRACR2A;RYR1;CACNA1H;ATP2C2;CHRNA4;TRPC6;GRIN3A;TRPV6;P2RX1;CCR5;PKD1L3
Peripheral Nervous System Development (GO:0007422)		21	5	0.809442	6.17709	0.00101648	0.320191	3084;6334;57211;7368;2947	GSTM3;NRG1;SCN8A;ADGRG6;UGT8
Negative Regulation of Stress Fiber Assembly (GO:0051497)		24	5	0.925077	5.40496	0.00192987	0.557249	5295;50848;3925;23370;4070	STMN1;PIK3R1;F11R;TACSTD2;ARHGEF18
Negative Regulation of Actin Filament Bundle Assembly (GO:0032232)		26	5	1.00217	4.98919	0.002803	0.693743	5295;50848;3925;23370;4070	STMN1;PIK3R1;F11R;TACSTD2;ARHGEF18
Protein Localization to Cell-Cell Junction (GO:0150105)		16	4	0.616718	6.48595	0.00274307	0.693743	50848;1003;286676;23370	ILDR1;F11R;CDH5;ARHGEF18
Cell Surface Receptor Protein Tyrosine Kinase Signaling Pathway (GO:0007169)		286	21	11.0238	1.90496	0.00361578	0.83301	5295;2308;3084;2268;2258;5618;285220;2045;5156;5155;3925;5164;8835;2674;1435;5228;2264;3667;2250;285;4058	PDK2;IRS1;ANGPT2;STMN1;PDGFB;PGF;PDGFRA;PIK3R1;FOXO1;LTK;NRG1;EPHA7;FGF5;EPHA6;GFRA1;FGR;FGFR4;SOCS2;FGF13;PRLR;CSF1
Regulation of MAPK Cascade (GO:0043408)		247	18	9.52058	1.89064	0.00730819	0.83301	958;8826;23542;2258;3123;8844;147040;8428;2045;26585;5155;2250;5187;23286;6815;23239;7984;60370	PDGFB;AVPI1;STYX;CD40;EPHA7;FGF5;HLA-DRB1;IQGAP1;STK24;MAPK8IP2;PHLPP1;KSR1;FGF13;ARHGEF5;GREM1;KCTD11;PER1;WWC1
Generation of Neurons (GO:0048699)		185	15	7.1308	2.10355	0.00534053	0.83301	2258;29127;6469;51384;51804;10371;4131;2018;25806;861;864;57502;26468;4009;9079	NLGN4X;LDB2;SHH;MAP1B;LHX6;RACGAP1;RUNX1;VAX2;EMX2;SEMA3A;RUNX3;FGF13;LMX1A;WNT16;SIX4
Modulation of Chemical Synaptic Transmission (GO:0050804)		116	11	4.4712	2.46019	0.00512733	0.83301	815;23542;3776;27345;2897;9229;6543;5334;116443;57555;57502	NLGN4X;SLC8A2;PLCL1;CAMK2A;KCNMB4;DLGAP1;NLGN2;MAPK8IP2;GRIN3A;GRIK1;KCNK2
Kidney Development (GO:0001822)		70	8	2.69814	2.96501	0.0053418	0.83301	392255;3070;7466;6469;4321;147040;27031;3037	HELLS;SHH;NPHP3;GDF6;HAS2;WFS1;KCTD11;MMP12
Regulation of MAP Kinase Activity (GO:0043405)		71	8	2.73668	2.92324	0.00582271	0.83301	7099;10221;2258;8844;6091;5155;146433;5997	TLR4;RGS2;PDGFB;IL34;TRIB1;ROBO1;KSR1;FGF13
Regulation of Stress Fiber Assembly (GO:0051492)		73	8	2.81377	2.84316	0.00688262	0.83301	5295;389;50848;3925;22843;23370;4070;7984	RHOC;STMN1;PIK3R1;PPM1E;F11R;TACSTD2;ARHGEF5;ARHGEF18
Endothelial Cell Migration (GO:0043542)		44	6	1.69597	3.53779	0.0064774	0.83301	7857;57449;1803;1003;1545;1960	SCG2;PLEKHG5;CYP1B1;EGR3;DPP4;CDH5
Cognition (GO:0050890)		45	6	1.73452	3.45917	0.00723654	0.83301	1137;55636;3198;84879;6543;152789	MFSD2A;SLC8A2;JAKMIP1;CHD7;CHRNA4;HOXA1
Peptide Hormone Processing (GO:0016486)		29	5	1.1178	4.47307	0.00460192	0.83301	1803;147040;1511;54760;590	CTSG;KCTD11;BCHE;DPP4;PCSK4
Positive Regulation of Calcium Ion Transport (GO:0051928)		29	5	1.1178	4.47307	0.00460192	0.83301	7466;815;84766;7225;5155	PDGFB;CAMK2A;CRACR2A;TRPC6;WFS1
Negative Regulation of Blood Coagulation (GO:0030195)		31	5	1.19489	4.18448	0.00618139	0.83301	114897;5156;5155;5054;3818	PDGFB;PDGFRA;SERPINE1;C1QTNF1;KLKB1
Signaling Receptor Ligand Precursor Processing (GO:0140448)		18	4	0.693807	5.76529	0.00433846	0.83301	1803;4321;54760;590	BCHE;DPP4;PCSK4;MMP12
Regulation of CD4-positive, Alpha-Beta T Cell Differentiation (GO:0043370)		11	3	0.423993	7.07558	0.00745262	0.83301	3123;861;864	RUNX1;HLA-DRB1;RUNX3
Regulation of Cardiac Muscle Cell Apoptotic Process (GO:0010665)		11	3	0.423993	7.07558	0.00745262	0.83301	3084;815;4058	LTK;CAMK2A;NRG1
Hematopoietic Stem Cell Proliferation (GO:0071425)		11	3	0.423993	7.07558	0.00745262	0.83301	51441;6423;861	RUNX1;YTHDF2;SFRP2
Regulation of Axon Regeneration (GO:0048679)		11	3	0.423993	7.07558	0.00745262	0.83301	8428;146760;5802	PTPRS;STK24;RTN4RL1
Epithelial Structure Maintenance (GO:0010669)		21	4	0.809442	4.94168	0.0077445	0.838584	11187;286676;56667;4588	ILDR1;MUC6;PKP3;MUC13
Regulation of Ketone Metabolic Process (GO:0010565)		12	3	0.462538	6.48595	0.00965565	0.955909	51422;5164;2264	PDK2;FGFR4;PRKAG2
Positive Regulation of Alpha-Beta T Cell Differentiation (GO:0046638)		12	3	0.462538	6.48595	0.00965565	0.955909	6469;861;864	SHH;RUNX1;RUNX3
Branching Involved in Blood Vessel Morphogenesis (GO:0001569)		12	3	0.462538	6.48595	0.00965565	0.955909	6469;6423;9723	SEMA3E;SHH;SFRP2
Nervous System Development (GO:0007399)		467	27	18.0004	1.49996	0.0235748	1	3084;2258;57717;55636;6469;4040;6334;57211;575;2897;6091;10439;56603;2018;25806;57555;2674;2250;84059;7368;1404;51057;1750;9079;89795;91768;5097	NAV3;LDB2;PCDHB16;DLX6;ADGRV1;SHH;PCDH1;WDPCP;ADGRB1;NRG1;FGF5;VAX2;GFRA1;LRP6;ROBO1;CHD7;EMX2;NLGN2;CYP26B1;FGF13;SCN8A;ADGRG6;GRIK1;OLFM1;HAPLN1;UGT8;CABLES1
Positive Regulation of Cell Population Proliferation (GO:0008284)		462	26	17.8077	1.46004	0.0345692	1	5295;8452;1869;225689;3084;1399;2258;1803;6469;6423;5618;5737;2651;282991;26585;3037;5156;5155;1435;5228;2264;3667;2250;3563;57540;146433	IRS1;BLOC1S2;PDGFB;PGF;IL34;PDGFRA;SHH;PIK3R1;DISP3;NRG1;FGF5;CUL3;FGFR4;HAS2;FGF13;SFRP2;PRLR;GREM1;CRKL;GCNT2;MAPK15;DPP4;CSF1;IL3RA;PTGFR;E2F1
Negative Regulation of Apoptotic Process (GO:0043066)		457	23	17.615	1.30571	0.11598	1	5295;7128;2308;7466;23542;7857;940;6469;51384;5618;51804;1003;9723;1960;26585;8835;4058;23601;5054;1311;114804;2907;25816	RNF157;SEMA3E;TNFAIP8;TNFAIP3;SHH;SERPINE1;PIK3R1;CLEC5A;SCG2;FOXO1;LTK;GRINA;SOCS2;MAPK8IP2;EGR3;WFS1;PRLR;GREM1;WNT16;CDH5;COMP;SIX4;CD28
Positive Regulation of MAPK Cascade (GO:0043410)		348	22	13.4136	1.64013	0.0159234	1	958;392255;3084;8826;7099;1399;2258;3123;8844;84766;51384;2651;6091;10371;5156;5155;2264;2250;60401;146433;23286;60370	EDA2R;TLR4;PDGFB;IL34;AVPI1;PDGFRA;CRACR2A;GDF6;CD40;NRG1;FGF5;HLA-DRB1;IQGAP1;ROBO1;FGFR4;SEMA3A;KSR1;FGF13;CRKL;GCNT2;WNT16;WWC1
Positive Regulation of Macromolecule Biosynthetic Process (GO:0010557)		349	20	13.4522	1.48675	0.0503599	1	1869;468;7099;2258;1029;940;51384;6424;114897;1003;6091;140628;10439;51312;5155;1435;2264;3667;9079;27074	TLR4;IRS1;CDKN2A;LDB2;SLC25A37;ATF4;PDGFB;C1QTNF1;SFRP4;ROBO1;FGFR4;LAMP3;FGF13;GATA5;WNT16;CSF1;OLFM1;CDH5;E2F1;CD28
Cellular Response to Oxygen-Containing Compound (GO:1901701)		368	20	14.1845	1.40999	0.0773048	1	7128;2308;3638;7099;1234;2099;4023;4283;1511;1080;5156;5155;5164;3667;4058;57559;5054;23641;1620;22843	TLR4;PDK2;IRS1;LDOC1;ESR1;PDGFB;PDGFRA;TNFAIP3;SERPINE1;STAMBPL1;FOXO1;LTK;PPM1E;CFTR;CTSG;LPL;INSIG1;CXCL9;CCR5;BRINP1
Positive Regulation of Gene Expression (GO:0010628)		423	20	16.3045	1.22666	0.202403	1	5295;1869;51065;468;2268;7099;1029;940;51384;6424;114897;1003;6091;140628;10439;5155;1435;2264;11187;27074	TLR4;CDKN2A;ATF4;PDGFB;PIK3R1;C1QTNF1;SFRP4;RPS27L;FGR;ROBO1;FGFR4;LAMP3;GATA5;WNT16;PKP3;CSF1;OLFM1;CDH5;E2F1;CD28
Inorganic Cation Transmembrane Transport (GO:0098662)		293	19	11.2936	1.68236	0.0189424	1	8912;3776;6334;6329;3751;340024;6005;55503;9914;525;6543;7225;5023;342372;480;6337;9311;3773;343450	SLC8A2;KCND2;KCNJ16;KCNT2;CACNA1H;ATP2C2;SLC6A19;SCNN1A;SCN4A;TRPC6;ATP1A4;SCN8A;TRPV6;ATP6V1B1;P2RX1;KCNK2;RHAG;PKD1L3;ASIC3
Monoatomic Cation Transmembrane Transport (GO:0098655)		292	18	11.2551	1.59928	0.034028	1	3776;6334;6329;3751;340024;55503;9914;525;6543;7225;5023;342372;116443;480;6337;9311;3773;343450	SLC8A2;KCND2;KCNJ16;KCNT2;ATP2C2;SLC6A19;SCNN1A;SCN4A;TRPC6;ATP1A4;GRIN3A;SCN8A;TRPV6;ATP6V1B1;P2RX1;KCNK2;PKD1L3;ASIC3
Positive Regulation of Apoptotic Process (GO:0043065)		306	18	11.7947	1.52611	0.0498376	1	958;1869;2308;666;468;1029;3725;8795;6424;6423;8878;8428;1545;10439;2045;55119;25816;138429	PRPF38B;CDKN2A;ATF4;BOK;TNFAIP8;SQSTM1;FOXO1;PIP5KL1;CD40;SFRP4;EPHA7;TNFRSF10B;STK24;CYP1B1;SFRP2;OLFM1;E2F1;JUN
Proteolysis (GO:0006508)		311	18	11.9875	1.50157	0.0565782	1	1803;6469;1636;4321;147040;1511;54760;3792;84059;5552;6768;140766;11174;63929;3818;1368;11131;10003	XPNPEP3;SRGN;ACE;ADGRV1;SHH;ADAMTS14;KLKB1;CTSG;NAALAD2;ADAMTS6;ST14;CPM;KCTD11;DPP4;PCSK4;CAPN11;KEL;MMP12
Negative Regulation of Signal Transduction (GO:0009968)		265	17	10.2144	1.66432	0.0279207	1	7128;23542;10221;2258;51441;51384;6424;6423;8878;10252;8835;3667;5997;8788;65989;8483;11197	WIF1;IRS1;RGS2;DLK1;SPRY1;TNFAIP3;SQSTM1;SFRP4;TRIB1;YTHDF2;SOCS2;MAPK8IP2;FGF13;SFRP2;CILP;WNT16;DLK2
Cellular Response to Lipid (GO:0071396)		225	16	8.67259	1.84489	0.0137241	1	7128;3638;7099;1234;2099;4023;4283;1511;1080;480;3667;4058;5054;23641;1620;22843	TLR4;IRS1;LDOC1;ESR1;TNFAIP3;SERPINE1;LTK;PPM1E;CFTR;CTSG;LPL;INSIG1;ATP1A4;CXCL9;CCR5;BRINP1
Positive Regulation of Programmed Cell Death (GO:0043068)		245	16	9.44349	1.69429	0.028011	1	1869;2308;666;468;1029;3725;8795;6424;6423;8878;8428;1545;10439;55119;25816;138429	PRPF38B;CDKN2A;ATF4;BOK;TNFAIP8;SQSTM1;FOXO1;PIP5KL1;SFRP4;TNFRSF10B;STK24;CYP1B1;SFRP2;OLFM1;E2F1;JUN
Positive Regulation of Cell Migration (GO:0030335)		331	16	12.7583	1.25408	0.209179	1	2268;1399;2258;389;1003;2651;6367;6357;10371;9723;3037;5156;5155;1435;7205;286077	RHOC;CCL13;PDGFB;SEMA3E;CCL22;PDGFRA;TRIP6;FGR;SEMA3A;HAS2;FAM83H;FGF13;CRKL;GCNT2;CSF1;CDH5
Negative Regulation of Gene Expression (GO:0010629)		355	16	13.6834	1.1693	0.295388	1	1111;1399;2258;51441;1797;2099;940;6423;23181;6091;140628;10439;5155;5552;8483;25976	DXO;ESR1;SRGN;PDGFB;DIP2A;TIPARP;ROBO1;YTHDF2;FGF13;SFRP2;GATA5;CRKL;CILP;OLFM1;CHEK1;CD28
Protein Phosphorylation (GO:0006468)		362	16	13.9532	1.14669	0.322454	1	1111;225689;2268;815;7099;10221;1511;8428;5105;5156;864;5155;2264;4058;23235;8576	TLR4;STK16;PDGFB;SIK2;PDGFRA;LTK;CAMK2A;TRIB1;PCK1;FGR;STK24;FGFR4;CTSG;RUNX3;MAPK15;CHEK1
Negative Regulation of Programmed Cell Death (GO:0043069)		369	16	14.2231	1.12493	0.350129	1	5295;2308;7466;940;6469;5618;51804;8878;1960;26585;8835;4058;23601;1311;114804;25816	RNF157;TNFAIP8;SHH;PIK3R1;CLEC5A;SQSTM1;FOXO1;LTK;SOCS2;EGR3;WFS1;PRLR;GREM1;COMP;SIX4;CD28
Positive Regulation of Multicellular Organismal Process (GO:0051240)		389	16	14.9939	1.0671	0.431189	1	2268;2258;940;6469;84327;5618;51804;4023;2651;140628;10439;5155;285;5054;8819;2118	ZBED3;ANGPT2;PDGFB;SHH;SAP30;SERPINE1;FGR;LPL;FGF13;GATA5;PRLR;GCNT2;OLFM1;SIX4;ETV4;CD28
Positive Regulation of Cell Motility (GO:2000147)		236	15	9.09659	1.64897	0.0400044	1	2268;389;1003;2651;6367;6357;10371;9723;3037;5156;5155;1435;7205;29085;286077	RHOC;CCL13;PDGFB;SEMA3E;CCL22;PDGFRA;PHPT1;TRIP6;FGR;SEMA3A;HAS2;FAM83H;GCNT2;CSF1;CDH5
Regulation of Intracellular Signal Transduction (GO:1902531)		295	15	11.3707	1.31918	0.167714	1	1111;29127;57449;84033;1003;8878;147040;8428;55119;23286;4168;23239;7984;51306;57569	PRPF38B;SQSTM1;MCF2;RACGAP1;FAM13B;STK24;PLEKHG5;ARHGAP20;PHLPP1;OBSCN;ARHGEF5;KCTD11;CDH5;CHEK1;WWC1
Supramolecular Fiber Organization (GO:0097435)		319	15	12.2958	1.21993	0.250137	1	2258;1029;79767;30011;84327;389;29765;4747;1545;26585;3925;1290;3868;140766;3855	ZBED3;RHOC;NEFL;SH3KBP1;CDKN2A;STMN1;COL5A2;ADAMTS14;CYP1B1;TMOD4;KRT7;FGF13;GREM1;KRT16;ELMO3
Intracellular Signaling Cassette (GO:0141124)		343	15	13.2209	1.13457	0.344847	1	5295;468;23542;7857;2258;1234;3725;5136;10663;3667;257397;9077;222950;57624;23370	IRS1;ATF4;PIK3R1;SCG2;PDE1A;DIRAS3;CXCR6;MAPK8IP2;NYAP1;FGF13;TAB3;NYAP2;CCR5;JUN;ARHGEF18
Negative Regulation of Cell Population Proliferation (GO:0008285)		360	15	13.8761	1.08099	0.415918	1	7128;1869;10221;1029;6424;6423;57413;575;1545;26585;864;23641;2172;23286;4330	CDKN2A;LDOC1;TNFAIP3;ADGRB1;TMIGD3;SFRP4;TRIB1;CYP1B1;RUNX3;MN1;FABP6;SFRP2;GREM1;E2F1;WWC1
Organelle Organization (GO:0006996)		418	15	16.1118	0.930998	0.649691	1	7128;225689;643699;653720;51441;8506;30011;6357;51057;84223;55785;118987;3868;832;219293	SH3KBP1;IQCG;CCL13;CAPZB;TNFAIP3;WDPCP;GOLGA8M;GOLGA8N;FGD6;YTHDF2;PDZD8;MAPK15;ATAD3C;KRT16;CNTNAP1
Regulation of RNA Biosynthetic Process (GO:2001141)		450	15	17.3452	0.864793	0.755148	1	83990;1869;8607;468;2099;55636;51312;864;23286;170959;8819;342909;163223;440515;26292	ZNF431;SLC25A37;ATF4;ESR1;MYCBP;SAP30;BRIP1;CHD7;ZNF676;RUNX3;ZNF284;RUVBL1;E2F1;ZNF506;WWC1
Negative Regulation of RNA Biosynthetic Process (GO:1902679)		454	15	17.4994	0.857174	0.766713	1	1869;2308;51001;3084;1029;3725;6423;51804;5155;5187;9079;148398;126272;91133;7089	L3MBTL4;CDKN2A;LDB2;PDGFB;FOXO1;NRG1;SFRP2;EID2B;PER1;SIX4;SAMD11;MTERF3;E2F1;JUN;TLE2
Regulation of ERK1 and ERK2 Cascade (GO:0070372)		213	14	8.21005	1.70523	0.0364651	1	3084;7099;1399;2258;3123;2651;2045;10252;5156;5155;2264;55885;6815;7984	LMO3;TLR4;PDGFB;PDGFRA;SPRY1;STYX;NRG1;EPHA7;HLA-DRB1;FGFR4;FGF13;ARHGEF5;CRKL;GCNT2
Central Nervous System Development (GO:0007417)		275	14	10.5998	1.32078	0.176836	1	3084;26227;55636;6469;2897;745;2045;56603;2018;25806;84879;1620;7368;1404	MFSD2A;SHH;NRG1;EPHA7;VAX2;CHD7;EMX2;CYP26B1;PHGDH;MYRF;GRIK1;HAPLN1;UGT8;BRINP1
Regulation of Angiogenesis (GO:0045765)		201	13	7.74752	1.67796	0.0476018	1	958;7128;2258;6423;575;1003;1545;9723;861;5054;64102;3818;5176	SEMA3E;TNFAIP3;SERPINE1;ADGRB1;CD40;RUNX1;SERPINF1;CYP1B1;KLKB1;FGF13;SFRP2;TNMD;CDH5
Negative Regulation of Cell Differentiation (GO:0045596)		211	13	8.13296	1.59843	0.064978	1	1869;2308;51441;6469;6423;27031;26585;10252;84059;57540;1290;126272;656	ADGRV1;SPRY1;SHH;NPHP3;COL5A2;DISP3;FOXO1;YTHDF2;SFRP2;GREM1;EID2B;BMP8B;E2F1
Negative Regulation of Multicellular Organismal Process (GO:0051241)		238	13	9.17368	1.4171	0.130959	1	468;7099;6469;6423;497189;6091;5334;10252;5552;23286;8819;4070;651	TLR4;TIFAB;ATF4;SRGN;SPRY1;SHH;PLCL1;SAP30;ROBO1;TACSTD2;BMP3;SFRP2;WWC1
Chemical Synaptic Transmission (GO:0007268)		255	13	9.82894	1.32263	0.186614	1	1137;4852;57717;3751;27345;23095;57468;6616;2897;9229;341359;116443;2557	SNAP25;PCDHB16;KCND2;SYT10;KCNMB4;DLGAP1;KIF1B;NPY;CHRNA4;GRIN3A;GABRA4;GRIK1;SLC12A5
Regulation of Canonical NF-kappaB Signal Transduction (GO:0043122)		267	13	10.2915	1.26318	0.231657	1	958;7128;7099;3123;2099;57449;8795;389;347734;8878;60401;5187;257397	EDA2R;RHOC;TLR4;ESR1;TNFAIP3;SQSTM1;CD40;TNFRSF10B;HLA-DRB1;PLEKHG5;SLC35B2;TAB3;PER1
Regulation of Cell Cycle (GO:0051726)		307	13	11.8333	1.0986	0.404297	1	51422;1111;23645;51514;8607;83444;8826;1029;3725;4040;864;1982;6990	CDKN2A;DYNLT3;DTL;INO80B;EIF4G2;LRP6;IQGAP1;PPP1R15A;RUNX3;PRKAG2;RUVBL1;JUN;CHEK1
Gene Expression (GO:0010467)		366	13	14.1074	0.921501	0.65889	1	1869;54512;161931;81875;636;64782;6428;4927;1511;5155;285;11224;402682	RPL35;SRSF3;UFSP1;ANGPT2;AEN;PDGFB;BICD1;ISG20L2;NUP88;CTSG;ADAD2;EXOSC4;E2F1
Ubiquitin-Dependent Protein Catabolic Process (GO:0006511)		419	13	16.1503	0.804939	0.825975	1	7128;8452;51514;10625;8878;84993;8835;378884;23072;79589;116138;55175;390595	IVNS1ABP;RNF128;NHLRC1;HECW1;TNFAIP3;DTL;SQSTM1;KLHL11;CUL3;UBL7;SOCS2;UBAP1L;KLHDC3
Metal Ion Transport (GO:0030001)		175	12	6.74535	1.779	0.0384293	1	1137;815;2258;1234;6334;6329;27345;55503;6261;116443;480;3773	CAMK2A;KCNMB4;KCNJ16;RYR1;CHRNA4;SCN4A;ATP1A4;GRIN3A;FGF13;SCN8A;TRPV6;CCR5
Neuron Differentiation (GO:0030182)		178	12	6.86098	1.74902	0.0428564	1	6469;51384;4040;2018;25806;861;864;57502;1620;26468;4009;9079	NLGN4X;LDB2;SHH;LHX6;RUNX1;VAX2;LRP6;EMX2;RUNX3;LMX1A;WNT16;BRINP1
Regulation of Cell Differentiation (GO:0045595)		188	12	7.24643	1.65599	0.0601439	1	468;54888;6469;26585;861;864;1435;4058;656;10848;23187;85446	NSUN2;ATF4;SHH;LTK;RUNX1;RUNX3;PHLDB1;GREM1;CSF1;BMP8B;ZFHX2;PPP1R13L
Negative Regulation of Macromolecule Biosynthetic Process (GO:0010558)		196	12	7.55479	1.5884	0.0769235	1	1399;2258;2099;940;6423;23181;6091;140628;10439;5155;8483;25976	ESR1;PDGFB;DIP2A;TIPARP;ROBO1;FGF13;SFRP2;GATA5;CRKL;CILP;OLFM1;CD28
Neuron Projection Development (GO:0031175)		201	12	7.74752	1.54888	0.08879	1	4852;8506;23181;79778;282991;168620;4131;4744;3925;84059;222950;57624	NEFH;BLOC1S2;STMN1;DIP2A;ADGRV1;MAP1B;MICALL2;NPY;NYAP1;NYAP2;CNTNAP1;BHLHA15
Cytokine-Mediated Signaling Pathway (GO:0019221)		248	12	9.55912	1.25535	0.24974	1	5295;5618;4283;1511;6367;6357;5155;8835;3667;60401;3563;146433	EDA2R;IRS1;CCL13;PDGFB;CCL22;IL34;PIK3R1;SOCS2;CTSG;CXCL9;PRLR;IL3RA
Inflammatory Response (GO:0006954)		250	12	9.63621	1.2453	0.258266	1	958;7099;7857;1234;57413;50848;5737;4283;6367;6357;3868;26279	TLR4;CCL13;PLA2G2D;CCL22;SCG2;TMIGD3;CD40;F11R;CXCL9;KRT16;CCR5;PTGFR
Positive Regulation of Cell Differentiation (GO:0045597)		283	12	10.9082	1.10009	0.409367	1	392255;6423;4023;2651;147040;3214;140628;10439;1435;55885;4070;10848	LMO3;HOXB4;GDF6;LPL;TACSTD2;SFRP2;GATA5;GCNT2;KCTD11;CSF1;OLFM1;PPP1R13L
Phosphorylation (GO:0016310)		288	12	11.1009	1.08099	0.433081	1	1111;2268;815;10221;1607;1511;8428;2045;864;5155;4058;23235	PDGFB;SIK2;DGKB;LTK;CAMK2A;TRIB1;EPHA7;FGR;STK24;CTSG;RUNX3;CHEK1
DNA Damage Response (GO:0006974)		395	12	15.2252	0.788166	0.838793	1	1137;83990;1111;1869;10635;23645;2308;666;25885;51514;225689;4832	NME3;BOK;DTL;FOXO1;POLR1A;RAD51AP1;PPP1R15A;BRIP1;CHRNA4;MAPK15;E2F1;CHEK1
Intracellular Calcium Ion Homeostasis (GO:0006874)		134	11	5.16501	2.12971	0.0145081	1	958;7466;5745;1003;6357;286097;9914;6543;6261;7225;118987	CCL13;SLC8A2;PTH1R;CD40;RYR1;ATP2C2;MICU3;PDZD8;TRPC6;WFS1;CDH5
Response to Endoplasmic Reticulum Stress (GO:0034976)		187	11	7.20789	1.52611	0.108153	1	5295;23645;468;7466;51528;80020;3725;8795;168620;1080;64714	ATF4;FOXRED2;PIK3R1;CFTR;TNFRSF10B;JKAMP;PPP1R15A;WFS1;PDIA2;JUN;BHLHA15
Positive Regulation of Protein Metabolic Process (GO:0051247)		197	11	7.59334	1.44864	0.14008	1	7128;2308;51514;51065;7466;940;51312;1435;2264;9079;25976	LDB2;SLC25A37;TNFAIP3;DTL;TIPARP;FOXO1;RPS27L;FGFR4;WFS1;CSF1;CD28
Regulation of Canonical Wnt Signaling Pathway (GO:0060828)		208	11	8.01733	1.37203	0.180324	1	8607;6424;6423;84327;8428;27031;26585;4300;23072;7089;130574	ZBED3;LYPD6;HECW1;NPHP3;MLLT3;SFRP4;STK24;SFRP2;GREM1;RUVBL1;TLE2
Regulation of Phosphatidylinositol 3-Kinase/Protein Kinase B Signal Transduction (GO:0051896)		212	11	8.17151	1.34614	0.196183	1	2268;2258;51384;2651;9723;5156;5155;3667;4058;138429;23239	IRS1;PDGFB;SEMA3E;PDGFRA;LTK;PIP5KL1;FGR;PHLPP1;FGF13;GCNT2;WNT16
Lipid Metabolic Process (GO:0006629)		242	11	9.32786	1.17926	0.33106	1	79152;4023;341;1607;5095;1545;1718;79746;2172;26279;154141	PLA2G2D;DGKB;DHCR24;PCCA;ECHDC3;CYP1B1;LPL;FABP6;FA2H;MBOAT1;APOC1
Cellular Response to Cytokine Stimulus (GO:0071345)		275	11	10.5998	1.03775	0.49375	1	5295;815;7099;5618;4321;1511;3037;8835;3667;60401;3563	EDA2R;TLR4;IRS1;PIK3R1;CAMK2A;SOCS2;HAS2;CTSG;PRLR;IL3RA;MMP12
Negative Regulation of Intracellular Signal Transduction (GO:1902532)		282	11	10.8696	1.01199	0.52762	1	7128;1399;2099;26585;56603;5187;378884;23286;8483;138429;23239	NHLRC1;ESR1;TNFAIP3;PIP5KL1;CYP26B1;PHLPP1;GREM1;CRKL;CILP;PER1;WWC1
Organelle Assembly (GO:0070925)		319	11	12.2958	0.894614	0.690255	1	51441;23210;8878;27031;84557;30844;51762;51057;57560;51524;9851	NPHP3;WDPCP;SQSTM1;TMEM138;KIAA0753;MAP1LC3A;YTHDF2;RAB8B;EHD4;IFT80;JMJD6
Protein Maturation (GO:0051604)		149	10	5.74318	1.74119	0.0624759	1	4321;1511;54760;3792;5552;5910;402682;63929;60496;1368	XPNPEP3;UFSP1;SRGN;AASDHPPT;CTSG;CPM;RAP1GDS1;PCSK4;KEL;MMP12
Skeletal System Development (GO:0001501)		150	10	5.78173	1.72959	0.0647559	1	5745;55636;1009;1404;1750;130367;1311;656;651;4982	DLX6;PTH1R;TNFRSF11B;CHD7;CDH11;BMP3;SGPP2;HAPLN1;COMP;BMP8B
Regulation of Small GTPase Mediated Signal Transduction (GO:0051056)		156	10	6.013	1.66306	0.0795513	1	29127;57449;84033;8878;55119;23370;4168;7984;51306;57569	PRPF38B;SQSTM1;MCF2;RACGAP1;FAM13B;PLEKHG5;ARHGAP20;OBSCN;ARHGEF5;ARHGEF18
Cell-Cell Adhesion via Plasma-Membrane Adhesion Molecules (GO:0098742)		168	10	6.47554	1.54427	0.114922	1	57717;84665;1009;1003;6091;140628;51208;137075;137970;5802	PCDHB16;PTPRS;ROBO1;CDH11;GATA5;UNC5D;MYPN;CLDN23;CLDN18;CDH5
Anterograde Trans-Synaptic Signaling (GO:0098916)		184	10	7.09225	1.40999	0.17363	1	1137;4852;57717;3751;27345;57468;6616;2897;9229;341359	SNAP25;PCDHB16;KCND2;SYT10;KCNMB4;DLGAP1;NPY;CHRNA4;GRIK1;SLC12A5
Axonogenesis (GO:0007409)		199	10	7.67043	1.30371	0.239056	1	6469;84665;575;10371;4131;4744;285220;2045;137970;9723	NEFH;SEMA3E;SHH;MAP1B;ADGRB1;EPHA7;EPHA6;SEMA3A;UNC5D;MYPN
Intracellular Monoatomic Cation Homeostasis (GO:0030003)		201	10	7.74752	1.29074	0.248406	1	958;5745;1003;6357;9914;6543;480;6337;4496;1356	CP;CCL13;SLC8A2;PTH1R;CD40;ATP2C2;SCNN1A;ATP1A4;MT1H;CDH5
Protein Polyubiquitination (GO:0000209)		218	10	8.40278	1.19008	0.332201	1	7128;8452;51514;1029;378884;90678;84675;23608;26118;55585	TRIM55;CDKN2A;NHLRC1;TNFAIP3;DTL;MKRN1;WSB1;CUL3;LRSAM1;UBE2Q1
Apoptotic Process (GO:0006915)		224	10	8.63405	1.15821	0.363071	1	392255;1111;23645;2308;666;4832;8795;158471;8428;94027	NME3;PRUNE2;BOK;FOXO1;GDF6;TNFRSF10B;PPP1R15A;STK24;CGB7;CHEK1
Positive Regulation of Signal Transduction (GO:0009967)		245	10	9.44349	1.05893	0.472445	1	7128;3714;6469;1003;6091;140628;57555;3667;375704;9450	IRS1;TNFAIP3;SHH;ROBO1;LY86;NLGN2;ENHO;GATA5;CDH5;JAG2
Proteasomal Protein Catabolic Process (GO:0010498)		340	10	13.1053	0.763053	0.849494	1	8452;51514;10625;7466;51528;80020;8835;378884;116138;55175	IVNS1ABP;NHLRC1;FOXRED2;DTL;KLHL11;JKAMP;CUL3;SOCS2;WFS1;KLHDC3
Calcium Ion Homeostasis (GO:0055074)		102	9	3.93158	2.28916	0.0168336	1	958;7466;5745;1003;6357;55503;9914;525;6543	CCL13;SLC8A2;PTH1R;CD40;ATP2C2;WFS1;TRPV6;ATP6V1B1;CDH5
Intrinsic Apoptotic Signaling Pathway (GO:0097193)		112	9	4.31702	2.08477	0.0289439	1	8452;1869;23645;666;468;8795;8428;1545;5164	PDK2;ATF4;BOK;TNFRSF10B;CUL3;PPP1R15A;STK24;CYP1B1;E2F1
Protein Processing (GO:0016485)		112	9	4.31702	2.08477	0.0289439	1	4321;1511;745;54760;3792;5552;63929;3818;1368	XPNPEP3;SRGN;KLKB1;CTSG;MYRF;CPM;PCSK4;KEL;MMP12
Cytoskeleton Organization (GO:0007010)		114	9	4.39411	2.04819	0.0319516	1	7128;8506;30011;6357;51057;55785;118987;3868;832	SH3KBP1;CCL13;CAPZB;TNFAIP3;WDPCP;FGD6;PDZD8;KRT16;CNTNAP1
Protein Autophosphorylation (GO:0046777)		136	9	5.2421	1.71687	0.0799459	1	225689;2268;815;8428;5156;2264;4058;23235;8576	STK16;SIK2;PDGFRA;LTK;CAMK2A;FGR;STK24;FGFR4;MAPK15
Negative Regulation of Wnt Signaling Pathway (GO:0030178)		139	9	5.35774	1.67981	0.0887408	1	6424;6423;8428;27031;26585;4300;23072;7089;11197	WIF1;HECW1;NPHP3;MLLT3;SFRP4;STK24;SFRP2;GREM1;TLE2
Protein Localization to Organelle (GO:0033365)		140	9	5.39628	1.66782	0.091795	1	23645;25885;636;1029;84033;51804;5910;27074;286077	CDKN2A;POLR1A;BICD1;PPP1R15A;FAM83H;LAMP3;OBSCN;RAP1GDS1;SIX4
Response to Lipopolysaccharide (GO:0032496)		155	9	5.97445	1.50641	0.144794	1	7128;7099;10221;1234;4283;1511;5054;23641;22843	TLR4;LDOC1;TNFAIP3;SERPINE1;PPM1E;TRIB1;CTSG;CXCL9;CCR5
Neuron Projection Morphogenesis (GO:0048812)		156	9	6.013	1.49676	0.148789	1	8826;23542;8506;23181;575;4131;4744;222950;57624	NEFH;DIP2A;MAP1B;ADGRB1;IQGAP1;MAPK8IP2;NYAP1;NYAP2;CNTNAP1
+ Reg of Phosphatidylinositol 3-Kinase/Prot Kinase B Signal Transduction (GO:0051897)		159	9	6.12863	1.46852	0.161097	1	2268;2258;51384;2651;9723;5156;5155;3667;4058	IRS1;PDGFB;SEMA3E;PDGFRA;LTK;FGR;FGF13;GCNT2;WNT16
Extracellular Matrix Organization (GO:0030198)		176	9	6.78389	1.32667	0.239083	1	4321;1511;1545;26585;3037;1290;8190;140766;11174	MIA;COL5A2;ADAMTS14;CYP1B1;HAS2;CTSG;ADAMTS6;GREM1;MMP12
Small GTPase-mediated Signal Transduction (GO:0007264)		184	9	7.09225	1.26899	0.279735	1	1399;2258;8844;5900;1029;29127;57449;9077;23370	CDKN2A;RALGDS;RACGAP1;DIRAS3;PLEKHG5;KSR1;FGF13;CRKL;ARHGEF18
Positive Regulation of Canonical NF-kappaB Signal Transduction (GO:0043123)		201	9	7.74752	1.16166	0.371226	1	958;7099;3123;57449;8795;389;347734;60401;257397	EDA2R;RHOC;TLR4;CD40;TNFRSF10B;HLA-DRB1;PLEKHG5;SLC35B2;TAB3
Regulation of Signal Transduction (GO:0009966)		203	9	7.82461	1.15022	0.382247	1	23542;6543;8835;5997;2786;23235;8490;5998;23732	FRRS1L;RGS2;RGS3;SLC8A2;SIK2;GNG4;SOCS2;MAPK8IP2;RGS5
Regulation of Cell Growth (GO:0001558)		211	9	8.13296	1.10661	0.426461	1	54512;3084;1029;6423;84879;8835;55119;1982;2786	MFSD2A;PRPF38B;CDKN2A;NRG1;EIF4G2;GNG4;SOCS2;SFRP2;EXOSC4
Plasma Membrane Bounded Cell Projection Assembly (GO:0120031)		252	9	9.7133	0.926564	0.639934	1	7414;27031;30844;51762;51057;57560;51524;9851;55785	NPHP3;WDPCP;VCL;FGD6;TMEM138;KIAA0753;RAB8B;EHD4;IFT80
Cellular Component Assembly (GO:0022607)		255	9	9.82894	0.915663	0.653829	1	958;51441;80115;134549;4744;54768;3037;57555;57502	NLGN4X;NEFH;BAIAP2L2;SHROOM1;CD40;YTHDF2;NLGN2;HAS2;HYDIN
RNA Processing (GO:0006396)		271	9	10.4457	0.861602	0.722538	1	54512;57418;10625;161931;81875;636;64782;54888;26993	WDR18;IVNS1ABP;NSUN2;AEN;AKAP8L;BICD1;ISG20L2;ADAD2;EXOSC4
DNA Metabolic Process (GO:0006259)		284	9	10.9467	0.822163	0.7713	1	4907;1137;83990;1111;10635;25885;4832;8607;83444	NT5E;NME3;INO80B;POLR1A;RAD51AP1;BRIP1;CHRNA4;RUVBL1;CHEK1
Protein Ubiquitination (GO:0016567)		349	9	13.4522	0.669038	0.925898	1	8452;51514;1029;378884;90678;114804;23608;26118;55585	CDKN2A;NHLRC1;RNF157;DTL;MKRN1;WSB1;CUL3;LRSAM1;UBE2Q1
Glucose Homeostasis (GO:0042593)		86	8	3.31486	2.41338	0.0176543	1	80201;5295;2308;7466;5105;5164;2264;3667	PDK2;IRS1;PIK3R1;FOXO1;PCK1;FGFR4;WFS1;HKDC1
Sodium Ion Transport (GO:0006814)		93	8	3.58467	2.23172	0.0269061	1	2258;6334;6329;340024;6543;480;6337;9311	SLC8A2;SLC6A19;SCNN1A;SCN4A;ATP1A4;FGF13;SCN8A;ASIC3
Regulation of Organelle Organization (GO:0033043)		93	8	3.58467	2.23172	0.0269061	1	225689;8607;83444;50848;8878;201161;5910;7984	CENPV;SQSTM1;INO80B;F11R;ARHGEF5;MAPK15;RAP1GDS1;RUVBL1
Monoatomic Ion Transport (GO:0006811)		99	8	3.81594	2.09647	0.037151	1	1137;57468;6543;7225;5023;342372;480;57156	TMEM63C;SLC8A2;CHRNA4;TRPC6;ATP1A4;P2RX1;PKD1L3;SLC12A5
Negative Regulation of Canonical Wnt Signaling Pathway (GO:0090090)		111	8	4.27848	1.86982	0.0648061	1	6424;6423;8428;27031;26585;4300;23072;7089	HECW1;NPHP3;MLLT3;SFRP4;STK24;SFRP2;GREM1;TLE2
Cellular Response to Oxidative Stress (GO:0034599)		116	8	4.4712	1.78923	0.0793132	1	8452;2308;468;51384;8428;4482;5156;5164	PDK2;ATF4;PDGFRA;FOXO1;CUL3;MSRA;STK24;WNT16
Cellular Response to Molecule of Bacterial Origin (GO:0071219)		116	8	4.4712	1.78923	0.0793132	1	7128;7099;1234;4283;1511;5054;23641;22843	TLR4;LDOC1;TNFAIP3;SERPINE1;PPM1E;CTSG;CXCL9;CCR5
Negative Regulation of DNA-binding Transcription Factor Activity (GO:0043433)		118	8	4.54829	1.7589	0.0856164	1	7128;10221;2099;6424;57413;1545;6911;170959	ZNF431;ESR1;TNFAIP3;TMIGD3;SFRP4;TRIB1;CYP1B1;TBX6
Cellular Response to Lipopolysaccharide (GO:0071222)		121	8	4.66393	1.71529	0.0956051	1	7128;7099;1234;4283;1511;5054;23641;22843	TLR4;LDOC1;TNFAIP3;SERPINE1;PPM1E;CTSG;CXCL9;CCR5
Regulation of GTPase Activity (GO:0043087)		131	8	5.04938	1.58435	0.133423	1	6001;85397;5996;55119;55785;7813;23329;7984	PRPF38B;TBC1D30;RGS1;RGS10;FGD6;EVI5;ARHGEF5;RGS8
Cellular Response to Starvation (GO:0009267)		134	8	5.16501	1.54888	0.14607	1	51422;2308;468;8428;84557;168620;84879;123	MFSD2A;ATF4;PLIN2;FOXO1;MAP1LC3A;STK24;PRKAG2;BHLHA15
Plasma Membrane Bounded Cell Projection Organization (GO:0120036)		136	8	5.2421	1.52611	0.154816	1	4852;79778;282991;4131;3925;51057;84223;29085	IQCG;BLOC1S2;STMN1;PHPT1;MAP1B;WDPCP;MICALL2;NPY
Negative Regulation of Response to External Stimulus (GO:0032102)		141	8	5.43482	1.47199	0.177732	1	7128;10221;2258;1003;146760;5802;5054;10848	PTPRS;TNFAIP3;SERPINE1;TRIB1;FGF13;RTN4RL1;CDH5;PPP1R13L
Positive Regulation of ERK1 and ERK2 Cascade (GO:0070374)		146	8	5.62755	1.42158	0.202042	1	3084;1399;2258;3123;2651;5156;5155;2264	PDGFB;PDGFRA;NRG1;HLA-DRB1;FGFR4;FGF13;CRKL;GCNT2
Axon Guidance (GO:0007411)		151	8	5.82027	1.37451	0.227601	1	6469;84665;10371;2596;285220;2045;137970;9723	SEMA3E;GAP43;SHH;EPHA7;EPHA6;SEMA3A;UNC5D;MYPN
Regulation of Cytokine Production (GO:0001817)		164	8	6.32136	1.26555	0.298713	1	2268;3123;940;11187;5187;6441;5552;7597	SFTPD;SRGN;ZBTB25;HLA-DRB1;FGR;PER1;PKP3;CD28
Regulation of Neuron Projection Development (GO:0010975)		169	8	6.51408	1.22811	0.327371	1	10371;146760;84879;4058;5802;154141;221914;114788	MFSD2A;GPC2;PTPRS;LTK;SEMA3A;RTN4RL1;CSMD3;MBOAT1
Defense Response to Bacterium (GO:0042742)		173	8	6.66826	1.19971	0.35063	1	2268;4852;7099;575;1511;5054;6441;257397	TLR4;SFTPD;SERPINE1;ADGRB1;FGR;NPY;CTSG;TAB3
Adenylate Cyclase-Modulating G Protein-Coupled Receptor Signaling Pathway (GO:0007188)		190	8	7.32352	1.09237	0.450612	1	5745;5737;57211;114897;4283;575;165140;5996	OXER1;PTH1R;RGS1;ADGRB1;C1QTNF1;CXCL9;ADGRG6;PTGFR
Cilium Organization (GO:0044782)		205	8	7.9017	1.01244	0.536703	1	27031;30844;51762;51057;57560;51524;9851;84223	IQCG;NPHP3;WDPCP;TMEM138;KIAA0753;RAB8B;EHD4;IFT80
Regulation of Autophagy (GO:0010506)		223	8	8.5955	0.930719	0.632353	1	2308;666;225689;8878;525;257397;27074;1982	BOK;SQSTM1;FOXO1;EIF4G2;LAMP3;TAB3;ATP6V1B1;MAPK15
Chromatin Remodeling (GO:0006338)		250	8	9.63621	0.830202	0.752866	1	1111;8607;83444;23210;2099;55636;23314;5187	ESR1;INO80B;SATB2;CHD7;PER1;JMJD6;RUVBL1;CHEK1
DNA Repair (GO:0006281)		280	8	10.7926	0.741251	0.850806	1	1137;83990;1111;10635;25885;4832;7374;9985	NME3;POLR1A;RAD51AP1;UNG;BRIP1;CHRNA4;REC8;CHEK1
Chromatin Organization (GO:0006325)		289	8	11.1395	0.718167	0.873265	1	1111;8607;83444;23210;2099;55636;23314;5187	ESR1;INO80B;SATB2;CHD7;PER1;JMJD6;RUVBL1;CHEK1
Protein-Containing Complex Assembly (GO:0065003)		306	8	11.7947	0.678269	0.908132	1	958;8452;666;3084;23542;5618;8624;7439	BOK;PSMG1;CD40;NRG1;CUL3;MAPK8IP2;BEST1;PRLR
Positive Regulation of Cytokine Production (GO:0001819)		308	8	11.8718	0.673865	0.911643	1	468;2268;7099;940;4023;1545;861;5054	TLR4;ATF4;SERPINE1;RUNX1;FGR;CYP1B1;LPL;CD28
Proteasome-Mediated Ubiquitin-Dependent Protein Catabolic Process (GO:0043161)		309	8	11.9104	0.671684	0.913355	1	8452;51514;10625;222235;8835;378884;116138;55175	IVNS1ABP;NHLRC1;FBXL13;DTL;KLHL11;CUL3;SOCS2;KLHDC3
Intracellular Protein Transport (GO:0006886)		318	8	12.2573	0.652674	0.927531	1	4927;4321;8428;51762;29886;64901;6804;29907	RANBP17;SNX8;NUP88;SNX15;STK24;RAB8B;STX1A;MMP12
Skin Development (GO:0043588)		65	7	2.50542	2.79395	0.0122539	1	51384;6261;3691;1718;1290;3868;6768	ITGB4;COL5A2;DHCR24;RYR1;ST14;WNT16;KRT16
Action Potential (GO:0001508)		66	7	2.54396	2.75161	0.0132671	1	1137;3776;6334;6329;3751;23630;27345	KCND2;KCNMB4;CHRNA4;SCN4A;SCN8A;KCNK2;KCNE5
Cell-Cell Junction Assembly (GO:0007043)		67	7	2.58251	2.71055	0.014339	1	2702;8506;389;7414;1009;1003;11187	RHOC;VCL;GJA5;CDH11;PKP3;CDH5;CNTNAP1
Regulation of Heart Contraction (GO:0008016)		70	7	2.69814	2.59438	0.0179241	1	2702;8912;3751;23630;57413;6543;157378	SLC8A2;TMEM65;TMIGD3;KCND2;GJA5;CACNA1H;KCNE5
Regulation of Notch Signaling Pathway (GO:0008593)		71	7	2.73668	2.55784	0.0192476	1	3714;51441;6091;140628;8788;65989;375704	DLK1;ROBO1;YTHDF2;ENHO;GATA5;JAG2;DLK2
Regulation of Rho Protein Signal Transduction (GO:0035023)		73	7	2.81377	2.48776	0.0220971	1	8452;50848;6091;3925;55119;23370;286205	PRPF38B;STMN1;SCAI;CUL3;ROBO1;F11R;ARHGEF18
Sodium Ion Transmembrane Transport (GO:0035725)		85	7	3.27631	2.13655	0.0454147	1	6334;6329;340024;6543;480;6337;9311	SLC8A2;SLC6A19;SCNN1A;SCN4A;ATP1A4;SCN8A;ASIC3
Actomyosin Structure Organization (GO:0031032)		85	7	3.27631	2.13655	0.0454147	1	4621;8452;29765;84033;50848;84665;51804	CUL3;F11R;TMOD4;OBSCN;MYH3;MYPN;SIX4
Positive Regulation of Response to Stimulus (GO:0048584)		87	7	3.3534	2.08743	0.0504176	1	8607;83444;3123;51278;79746;2070;100130733	EYA4;IER5;INO80B;LRRC70;HLA-DRB1;ECHDC3;RUVBL1
Response to Calcium Ion (GO:0051592)		92	7	3.54613	1.97398	0.0643989	1	728294;8826;27345;286097;55503;6261;84059	ADGRV1;KCNMB4;IQGAP1;RYR1;MICU3;TRPV6;D2HGDH
Inorganic Cation Import Across Plasma Membrane (GO:0098659)		93	7	3.58467	1.95276	0.0674507	1	8912;57468;55503;6543;480;6337;3773	SLC8A2;KCNJ16;CACNA1H;SCNN1A;ATP1A4;TRPV6;SLC12A5
Muscle Contraction (GO:0006936)		95	7	3.66176	1.91165	0.0738108	1	4621;8912;29765;6329;3751;6261;8082	KCND2;RYR1;CACNA1H;TMOD4;SCN4A;SSPN;MYH3
Positive Regulation of Hydrolase Activity (GO:0051345)		96	7	3.70031	1.89174	0.0771193	1	6001;85397;389;5996;55119;7813;23329	RHOC;PRPF38B;TBC1D30;RGS1;RGS10;EVI5;RGS8
Positive Regulation of DNA Metabolic Process (GO:0051054)		104	7	4.00867	1.74622	0.106636	1	225689;8607;83444;2258;5155;2264;2070	EYA4;PDGFB;INO80B;FGFR4;FGF13;MAPK15;RUVBL1
Positive Regulation of Vasculature Development (GO:1904018)		107	7	4.1243	1.69726	0.119071	1	958;2258;6423;1003;1545;861;5054	SERPINE1;CD40;RUNX1;CYP1B1;FGF13;SFRP2;CDH5
Protein Complex Oligomerization (GO:0051259)		112	7	4.31702	1.62149	0.141371	1	666;3123;23210;23089;30844;7439;1311	BOK;PEG10;HLA-DRB1;BEST1;EHD4;COMP;JMJD6
Regulation of JNK Cascade (GO:0046328)		112	7	4.31702	1.62149	0.141371	1	23542;84766;51384;10371;60401;5187;23239	EDA2R;CRACR2A;MAPK8IP2;SEMA3A;PHLPP1;WNT16;PER1
Antimicrobial Humoral Response (GO:0019730)		122	7	4.70247	1.48858	0.191368	1	4852;4283;1511;9547;6367;116842;6357	CCL13;CCL22;LEAP2;NPY;CTSG;CXCL9;CXCL14
Monocarboxylic Acid Metabolic Process (GO:0032787)		124	7	4.77956	1.46457	0.202138	1	57717;79152;4023;5095;56603;79746;60496	PCDHB16;AASDHPPT;PCCA;CYP26B1;ECHDC3;LPL;FA2H
Positive Regulation of Angiogenesis (GO:0045766)		124	7	4.77956	1.46457	0.202138	1	958;2258;6423;1003;1545;861;5054	SERPINE1;CD40;RUNX1;CYP1B1;FGF13;SFRP2;CDH5
Protein Localization to Nucleus (GO:0034504)		124	7	4.77956	1.46457	0.202138	1	4927;1029;51804;4321;8428;5910;64901	RANBP17;CDKN2A;NUP88;STK24;RAP1GDS1;SIX4;MMP12
RNA Biosynthetic Process (GO:0032774)		128	7	4.93374	1.4188	0.224347	1	1869;54512;57106;161931;81875;636;64782	AEN;NAT14;BICD1;ISG20L2;ADAD2;EXOSC4;E2F1
Potassium Ion Transmembrane Transport (GO:0071805)		130	7	5.01083	1.39697	0.23576	1	3776;3751;23630;57468;480;3773;343450	KCND2;KCNJ16;KCNT2;ATP1A4;KCNK2;KCNE5;SLC12A5
Neuron Projection Guidance (GO:0097485)		132	7	5.08792	1.37581	0.247359	1	6469;84665;10371;285220;2045;137970;9723	SEMA3E;SHH;EPHA7;EPHA6;SEMA3A;UNC5D;MYPN
Protein Homooligomerization (GO:0051260)		138	7	5.31919	1.31599	0.28313	1	57717;23210;23089;27165;30844;6261;1311	PCDHB16;PEG10;GLS2;RYR1;EHD4;COMP;JMJD6
Phosphate-Containing Compound Metabolic Process (GO:0006796)		139	7	5.35774	1.30652	0.289214	1	80201;4023;55258;2045;378884;26279;27304	NHLRC1;PLA2G2D;MOCS3;EPHA7;LPL;THNSL2;HKDC1
Adenylate Cyclase-Activating G Protein-Coupled Receptor Signaling Pathway (GO:0007189)		140	7	5.39628	1.29719	0.295329	1	5745;83873;5737;57211;114897;4283;575	PTH1R;ADGRB1;C1QTNF1;CXCL9;ADGRG6;GPR61;PTGFR
Neuron Development (GO:0048666)		154	7	5.93591	1.17926	0.383079	1	4852;79778;282991;4131;861;864;3925	BLOC1S2;STMN1;MAP1B;MICALL2;RUNX1;NPY;RUNX3
Positive Regulation of Response to External Stimulus (GO:0032103)		159	7	6.12863	1.14218	0.414825	1	7099;4023;5156;5155;5054;90678;9450	TLR4;PDGFB;PDGFRA;SERPINE1;LY86;LRSAM1;LPL
Negative Regulation of Cytokine Production (GO:0001818)		182	7	7.01516	0.997838	0.556534	1	7128;8452;7099;3123;6441;5552;89795	NAV3;TLR4;SFTPD;SRGN;TNFAIP3;HLA-DRB1;CUL3
Protein Localization to Membrane (GO:0072657)		189	7	7.28498	0.960881	0.596724	1	2258;4040;50848;30844;57555;11187;9053	LRP6;NLGN2;F11R;FGF13;EHD4;PKP3;MAP7
DNA-templated Transcription (GO:0006351)		194	7	7.4777	0.936116	0.624259	1	1869;51001;468;10625;2960;57106;51513	IVNS1ABP;NAT14;ATF4;ETV7;MTERF3;E2F1;GTF2E1
Cilium Assembly (GO:0060271)		219	7	8.44132	0.829254	0.744889	1	27031;30844;51762;51057;57560;51524;9851	NPHP3;WDPCP;TMEM138;KIAA0753;RAB8B;EHD4;IFT80
Positive Regulation of Developmental Process (GO:0051094)		226	7	8.71114	0.803569	0.773243	1	6469;84327;4023;5155;8819;10848;23187	ZBED3;PDGFB;SHH;SAP30;LPL;PHLDB1;PPP1R13L
Protein Modification by Small Protein Conjugation (GO:0032446)		304	7	11.7176	0.59739	0.951521	1	8452;1029;402682;6804;114804;27304;23608	CDKN2A;RNF157;UFSP1;MOCS3;MKRN1;CUL3;STX1A
Protein Localization (GO:0008104)		347	7	13.3751	0.523362	0.982095	1	636;84766;7414;8878;29886;6804;29907	SNX8;VCL;SQSTM1;CRACR2A;BICD1;SNX15;STX1A
Blood Vessel Morphogenesis (GO:0048514)		50	6	1.92724	3.11326	0.0120192	1	2702;6469;1545;3198;80864;3037	SHH;GJA5;EGFL8;CYP1B1;HAS2;HOXA1
Apical Junction Assembly (GO:0043297)		50	6	1.92724	3.11326	0.0120192	1	389;79778;7414;1003;51208;137075	RHOC;VCL;MICALL2;CLDN23;CLDN18;CDH5
Myofibril Assembly (GO:0030239)		51	6	1.96579	3.05221	0.0131913	1	4621;29765;84033;84665;51804;5156	PDGFRA;TMOD4;OBSCN;MYH3;MYPN;SIX4
Regulation of Embryonic Development (GO:0045995)		56	6	2.15851	2.77969	0.020264	1	8607;83444;29127;84327;51057;23187	ZBED3;WDPCP;INO80B;RACGAP1;PHLDB1;RUVBL1
Peptidyl-Tyrosine Phosphorylation (GO:0018108)		56	6	2.15851	2.77969	0.020264	1	2268;5618;5156;5155;2264;4058	PDGFB;PDGFRA;LTK;FGR;FGFR4;PRLR
Renal System Development (GO:0072001)		57	6	2.19706	2.73093	0.0219363	1	3070;7466;4321;147040;27031;3037	HELLS;NPHP3;HAS2;WFS1;KCTD11;MMP12
Positive Regulation of MAP Kinase Activity (GO:0043406)		65	6	2.50542	2.39481	0.0387196	1	7099;2258;6091;5155;146433;7984	TLR4;PDGFB;IL34;ROBO1;FGF13;ARHGEF5
Cell-Cell Junction Organization (GO:0045216)		65	6	2.50542	2.39481	0.0387196	1	1009;1003;51208;57555;57502;11187	NLGN4X;NLGN2;CDH11;PKP3;CLDN18;CDH5
Regulation of G Protein-Coupled Receptor Signaling Pathway (GO:0008277)		71	6	2.73668	2.19243	0.0555533	1	85397;815;5997;2786;8490;5998	RGS2;RGS3;CAMK2A;GNG4;RGS5;RGS8
Negative Regulation of Extrinsic Apoptotic Signaling Pathway (GO:2001237)		72	6	2.77523	2.16198	0.0587274	1	7128;3084;7857;5054;2907;2070	EYA4;TNFAIP3;SERPINE1;SCG2;GRINA;NRG1
Calcium Ion Transmembrane Import Into Cytosol (GO:0097553)		72	6	2.77523	2.16198	0.0587274	1	8912;2258;55503;6543;5334;6261	SLC8A2;PLCL1;RYR1;CACNA1H;FGF13;TRPV6
Positive Regulation of Growth (GO:0045927)		72	6	2.77523	2.16198	0.0587274	1	54512;7466;3084;6423;84879;1982	MFSD2A;NRG1;EIF4G2;WFS1;SFRP2;EXOSC4
Positive Regulation of Protein Serine/Threonine Kinase Activity (GO:0071902)		72	6	2.77523	2.16198	0.0587274	1	7099;2258;6091;6543;5155;146433	TLR4;PDGFB;SLC8A2;IL34;ROBO1;FGF13
Response to Insulin (GO:0032868)		77	6	2.96795	2.02159	0.0761911	1	5295;2308;3638;84327;5105;3667	ZBED3;IRS1;PIK3R1;FOXO1;PCK1;INSIG1
Sphingolipid Biosynthetic Process (GO:0030148)		81	6	3.12213	1.92176	0.0920598	1	6487;79152;8560;8705;7368;79993	ELOVL7;ST3GAL3;DEGS1;B3GALT4;UGT8;FA2H
Inorganic Anion Transmembrane Transport (GO:0098661)		82	6	3.16068	1.89833	0.0962859	1	29127;3776;57468;375611;1080;2557	CFTR;RACGAP1;SLC26A5;GABRA4;KCNK2;SLC12A5
Calcium Ion Transmembrane Transport (GO:0070588)		86	6	3.31486	1.81003	0.114199	1	55503;9914;6543;7225;5023;342372	SLC8A2;ATP2C2;TRPC6;TRPV6;P2RX1;PKD1L3
Positive Regulation of Biosynthetic Process (GO:0009891)		86	6	3.31486	1.81003	0.114199	1	51422;2308;7099;2099;5105;861	TLR4;ESR1;FOXO1;RUNX1;PCK1;PRKAG2
Regulation of Insulin Secretion (GO:0050796)		87	6	3.3534	1.78923	0.118923	1	2308;114897;6616;57555;3667;6804	SNAP25;IRS1;FOXO1;C1QTNF1;NLGN2;STX1A
Negative Regulation of Angiogenesis (GO:0016525)		88	6	3.39195	1.7689	0.123744	1	575;9723;5054;64102;3818;5176	SEMA3E;SERPINE1;ADGRB1;SERPINF1;KLKB1;TNMD
Cellular Response to Peptide Hormone Stimulus (GO:0071375)		89	6	3.43049	1.74902	0.128659	1	5295;2308;3638;5105;3667;6337	IRS1;PIK3R1;FOXO1;PCK1;SCNN1A;INSIG1
Chloride Transport (GO:0006821)		89	6	3.43049	1.74902	0.128659	1	3776;57468;375611;1080;2557;7439	CFTR;SLC26A5;BEST1;GABRA4;KCNK2;SLC12A5
Establishment of Protein Localization to Organelle (GO:0072594)		90	6	3.46904	1.72959	0.133666	1	4927;4321;8428;64901;90678;27074	RANBP17;NUP88;STK24;LRSAM1;LAMP3;MMP12
Regulation of Epithelial to Mesenchymal Transition (GO:0010717)		91	6	3.50758	1.71058	0.138765	1	6423;2651;10439;26585;10252;23187	SPRY1;PHLDB1;SFRP2;GREM1;GCNT2;OLFM1
Visual Perception (GO:0007601)		92	6	3.54613	1.69199	0.143954	1	7466;25806;84059;7439;5875;2070	EYA4;ADGRV1;RABGGTA;VAX2;BEST1;WFS1
Sensory Perception of Light Stimulus (GO:0050953)		93	6	3.58467	1.67379	0.14923	1	7466;25806;84059;7439;5875;2070	EYA4;ADGRV1;RABGGTA;VAX2;BEST1;WFS1
Antimicrobial Humoral Immune Response Mediated by Antimicrobial Peptide (GO:0061844)		98	6	3.7774	1.5884	0.176859	1	4852;4283;9547;6367;116842;6357	CCL13;CCL22;LEAP2;NPY;CXCL9;CXCL14
Positive Regulation of Cell Growth (GO:0030307)		100	6	3.85449	1.55663	0.188455	1	54512;3084;6423;84879;1982;114804	MFSD2A;RNF157;NRG1;EIF4G2;SFRP2;EXOSC4
Hemopoiesis (GO:0030097)		101	6	3.89303	1.54122	0.194362	1	468;51441;6423;861;864;5155	ATF4;PDGFB;RUNX1;YTHDF2;RUNX3;SFRP2
Steroid Metabolic Process (GO:0008202)		101	6	3.89303	1.54122	0.194362	1	6469;5618;1545;1718;283316;3290	CD163L1;SHH;DHCR24;HSD11B1;CYP1B1;PRLR
Cellular Response to Insulin Stimulus (GO:0032869)		103	6	3.97012	1.51129	0.20638	1	5295;2308;3638;5105;5164;3667	PDK2;IRS1;PIK3R1;FOXO1;PCK1;INSIG1
Negative Regulation of Developmental Process (GO:0051093)		103	6	3.97012	1.51129	0.20638	1	6469;26585;116443;5802;8819;656	PTPRS;SHH;SAP30;GRIN3A;GREM1;BMP8B
Cellular Response to Metal Ion (GO:0071248)		103	6	3.97012	1.51129	0.20638	1	8912;8826;286097;6261;4496;84059	ADGRV1;IQGAP1;RYR1;CACNA1H;MICU3;MT1H
Dephosphorylation (GO:0016311)		104	6	4.00867	1.49676	0.212486	1	55258;5802;378884;5775;29085;130367	PTPN4;NHLRC1;PTPRS;PHPT1;SGPP2;THNSL2
Axon Development (GO:0061564)		106	6	4.08575	1.46852	0.224884	1	575;168620;146760;2596;4131;4744	NEFH;GAP43;MAP1B;ADGRB1;RTN4RL1;BHLHA15
Positive Regulation of Cell Cycle Process (GO:0090068)		107	6	4.1243	1.45479	0.23117	1	8452;29127;940;201161;5155;9493	PDGFB;CENPV;RACGAP1;CUL3;KIF23;CD28
Positive Regulation of GTPase Activity (GO:0043547)		108	6	4.16284	1.44132	0.23751	1	6001;85397;5996;55119;7813;23329	PRPF38B;TBC1D30;RGS1;RGS10;EVI5;RGS8
Positive Regulation of Wnt Signaling Pathway (GO:0030177)		113	6	4.35557	1.37755	0.269952	1	7128;8607;6424;6423;84327;130574	ZBED3;LYPD6;TNFAIP3;SFRP4;SFRP2;RUVBL1
MAPK Cascade (GO:0000165)		116	6	4.4712	1.34192	0.289918	1	23542;10221;1399;7857;2258;1234	SCG2;TRIB1;MAPK8IP2;FGF13;CRKL;CCR5
Negative Regulation of MAPK Cascade (GO:0043409)		117	6	4.50975	1.33045	0.296642	1	2308;7099;10252;5187;55885;5997	LMO3;TLR4;RGS2;SPRY1;FOXO1;PER1
Enzyme-Linked Receptor Protein Signaling Pathway (GO:0007167)		117	6	4.50975	1.33045	0.296642	1	3084;2268;1399;5156;1435;4058	PDGFRA;LTK;NRG1;FGR;CRKL;CSF1
- Reg of Transmembrane Receptor Prot Serine/Threonine Kinase Sgnlng Pway (GO:0090101)		118	6	4.54829	1.31918	0.303396	1	1399;23089;26585;10252;8819;8483	SPRY1;PEG10;SAP30;GREM1;CRKL;CILP
Protein Localization to Plasma Membrane (GO:0072659)		122	6	4.70247	1.27592	0.330667	1	2258;4040;50848;30844;11187;9053	LRP6;F11R;FGF13;EHD4;PKP3;MAP7
Regulation of Anatomical Structure Morphogenesis (GO:0022603)		122	6	4.70247	1.27592	0.330667	1	7128;2258;118987;832;23072;23187	CAPZB;HECW1;TNFAIP3;PDZD8;PHLDB1;FGF13
Potassium Ion Transport (GO:0006813)		122	6	4.70247	1.27592	0.330667	1	3776;3751;27345;480;3773;343450	KCND2;KCNMB4;KCNJ16;KCNT2;ATP1A4;KCNK2
Regulation of Neuron Apoptotic Process (GO:0043523)		124	6	4.77956	1.25535	0.34442	1	468;7466;51804;2045;9723;2907	ATF4;SEMA3E;GRINA;EPHA7;WFS1;SIX4
Protein Localization to Cell Periphery (GO:1990778)		127	6	4.8952	1.22569	0.365145	1	2258;4040;50848;30844;11187;9053	LRP6;F11R;FGF13;EHD4;PKP3;MAP7
Membraneless Organelle Assembly (GO:0140694)		135	6	5.20356	1.15306	0.420541	1	636;51441;23210;29765;8878;23354	SQSTM1;BICD1;YTHDF2;TMOD4;JMJD6;HAUS5
Regulation of Cytoskeleton Organization (GO:0051493)		136	6	5.2421	1.14458	0.42744	1	636;389;50848;5156;7984;23187	RHOC;PDGFRA;BICD1;F11R;PHLDB1;ARHGEF5
Synapse Organization (GO:0050808)		144	6	5.55046	1.08099	0.482034	1	57717;9723;6543;57555;57502;5802	NLGN4X;PCDHB16;SEMA3E;SLC8A2;PTPRS;NLGN2
Actin Filament Organization (GO:0007015)		151	6	5.82027	1.03088	0.528451	1	80115;79767;30011;84327;389;29765	ZBED3;RHOC;SH3KBP1;BAIAP2L2;TMOD4;ELMO3
Brain Development (GO:0007420)		160	6	6.16718	0.972892	0.58545	1	3084;26227;2045;2018;25806;84879	MFSD2A;NRG1;EPHA7;VAX2;EMX2;PHGDH
Heart Development (GO:0007507)		165	6	6.3599	0.943411	0.615539	1	2702;55636;6469;140628;5155;55803	ADAP2;PDGFB;SHH;GJA5;CHD7;GATA5
Positive Regulation of Catabolic Process (GO:0009896)		181	6	6.97662	0.860015	0.703016	1	7128;2308;51514;1797;8878;25976	DXO;TNFAIP3;DTL;TIPARP;SQSTM1;FOXO1
Protein Stabilization (GO:0050821)		200	6	7.70897	0.778314	0.788097	1	5295;8607;7466;1029;84327;8428	ZBED3;CDKN2A;PIK3R1;STK24;WFS1;RUVBL1
Modification-Dependent Protein Catabolic Process (GO:0019941)		201	6	7.74752	0.774442	0.792008	1	8452;51514;8878;84993;23072;79589	RNF128;HECW1;DTL;SQSTM1;CUL3;UBL7
Regulation of Inflammatory Response (GO:0050727)		236	6	9.09659	0.659588	0.896754	1	7128;7099;4023;1003;5054;10848	TLR4;TNFAIP3;SERPINE1;LPL;CDH5;PPP1R13L
Protein Transport (GO:0015031)		300	6	11.5635	0.518876	0.976524	1	7857;29886;90678;6804;29907;53353	SNX8;SCG2;SNX15;LRSAM1;LRP1B;STX1A
Positive Regulation of Cell Division (GO:0051781)		35	5	1.34907	3.70626	0.0104134	1	8452;29127;6469;201161;9493	SHH;CENPV;RACGAP1;CUL3;KIF23
Regulation of Blood Circulation (GO:1903522)		36	5	1.38761	3.60331	0.0117194	1	8912;3751;23630;27345;57413	TMIGD3;KCND2;KCNMB4;CACNA1H;KCNE5
Skeletal System Morphogenesis (GO:0048705)		40	5	1.54179	3.24297	0.0180488	1	6424;3235;3214;56603;5156	PDGFRA;HOXB4;HOXD9;SFRP4;CYP26B1
T Cell Differentiation (GO:0030217)		46	5	1.77306	2.81998	0.0311976	1	5295;3714;940;55636;6469	SHH;PIK3R1;CHD7;JAG2;CD28
Regulation of Interleukin-2 Production (GO:0032663)		47	5	1.81161	2.75998	0.0338469	1	7128;940;861;6441;89795	NAV3;SFTPD;TNFAIP3;RUNX1;CD28
Regulation of Endothelial Cell Apoptotic Process (GO:2000351)		47	5	1.81161	2.75998	0.0338469	1	958;7128;7857;1003;5054	TNFAIP3;SERPINE1;SCG2;CD40;CDH5
Regulation of Trans-Synaptic Signaling (GO:0099177)		47	5	1.81161	2.75998	0.0338469	1	2897;9229;116443;57555;57502	NLGN4X;DLGAP1;NLGN2;GRIN3A;GRIK1
Regulation of Stem Cell Differentiation (GO:2000736)		48	5	1.85015	2.70248	0.0366316	1	51441;54888;3214;5156;4070	NSUN2;PDGFRA;HOXB4;YTHDF2;TACSTD2
Regulation of Lipid Metabolic Process (GO:0019216)		49	5	1.8887	2.64733	0.0395531	1	51422;341;5105;2264;57540	DISP3;PCK1;FGFR4;PRKAG2;APOC1
Negative Regulation of Protein Ubiquitination (GO:0031397)		50	5	1.92724	2.59438	0.0426124	1	7128;10625;1029;575;8878	IVNS1ABP;CDKN2A;TNFAIP3;ADGRB1;SQSTM1
Regulation of Peptide Hormone Secretion (GO:0090276)		50	5	1.92724	2.59438	0.0426124	1	55636;114897;6616;286676;6804	SNAP25;ILDR1;C1QTNF1;CHD7;STX1A
Cardiac Muscle Tissue Development (GO:0048738)		50	5	1.92724	2.59438	0.0426124	1	2702;3084;140628;26585;51312	SLC25A37;NRG1;GJA5;GATA5;GREM1
Tight Junction Assembly (GO:0120192)		50	5	1.92724	2.59438	0.0426124	1	79778;1003;51208;137075;286676	ILDR1;MICALL2;CLDN23;CLDN18;CDH5
Cellular Response to Mechanical Stimulus (GO:0071260)		52	5	2.00433	2.4946	0.0491475	1	958;1111;7099;8795;50848	TLR4;CD40;TNFRSF10B;F11R;CHEK1
Intrinsic Apoptotic Signaling Pathway in Response to DNA Damage (GO:0008630)		52	5	2.00433	2.4946	0.0491475	1	1869;666;51065;64782;29965	AEN;BOK;RPS27L;E2F1;CDIP1
Regulation of Microtubule Polymerization (GO:0031113)		52	5	2.00433	2.4946	0.0491475	1	1003;3925;23354;79998;89795	NAV3;STMN1;ANKRD53;CDH5;HAUS5
Glucose Metabolic Process (GO:0006006)		55	5	2.11997	2.35853	0.0599966	1	80201;468;5105;5164;390637	PDK2;ATF4;PCK1;GDPGP1;HKDC1
Mitotic Cytokinesis (GO:0000281)		61	5	2.35124	2.12654	0.0854346	1	29127;389;3925;9493;200942	RHOC;STMN1;RACGAP1;KLHDC8B;KIF23
Neuropeptide Signaling Pathway (GO:0007218)		64	5	2.46687	2.02686	0.099971	1	4852;2587;11247;57105;347148	GALR1;QRFP;NPY;NXPH4;CYSLTR2
Regulation of Cell-Matrix Adhesion (GO:0001952)		64	5	2.46687	2.02686	0.099971	1	1029;7414;9723;1435;9079	CDKN2A;LDB2;SEMA3E;VCL;CSF1
Chordate Embryonic Development (GO:0043009)		65	5	2.50542	1.99568	0.105075	1	55636;51804;80864;51057;1750	DLX6;WDPCP;CHD7;EGFL8;SIX4
Chloride Transmembrane Transport (GO:1902476)		65	5	2.50542	1.99568	0.105075	1	3776;57468;375611;1080;2557	CFTR;SLC26A5;GABRA4;KCNK2;SLC12A5
Regulation of Protein Serine/Threonine Kinase Activity (GO:0071900)		66	5	2.54396	1.96544	0.110306	1	10221;8844;4040;6543;9077	SLC8A2;TRIB1;DIRAS3;LRP6;KSR1
Ras Protein Signal Transduction (GO:0007265)		67	5	2.58251	1.9361	0.11566	1	1399;2258;8844;5900;1029	CDKN2A;RALGDS;KSR1;FGF13;CRKL
Cell Junction Organization (GO:0034330)		68	5	2.62105	1.90763	0.121136	1	9723;6543;57555;57502;51762	NLGN4X;SEMA3E;SLC8A2;NLGN2;RAB8B
Cellular Response to Reactive Oxygen Species (GO:0034614)		69	5	2.6596	1.87999	0.12673	1	7128;1545;5156;5164;55119	PDK2;PRPF38B;PDGFRA;TNFAIP3;CYP1B1
Negative Regulation of Epithelial Cell Proliferation (GO:0050680)		70	5	2.69814	1.85313	0.132441	1	7857;6423;6091;864;64102	SCG2;ROBO1;RUNX3;SFRP2;TNMD
Cell Chemotaxis (GO:0060326)		70	5	2.69814	1.85313	0.132441	1	1234;57449;1960;10663;5155	PDGFB;PLEKHG5;CXCR6;EGR3;CCR5
Regulation of Cytokinesis (GO:0032465)		71	5	2.73668	1.82703	0.138266	1	8452;29127;201161;9493;79998	CENPV;ANKRD53;RACGAP1;CUL3;KIF23
Regulation of Fat Cell Differentiation (GO:0045598)		72	5	2.77523	1.80165	0.144202	1	1869;2308;6423;4023;55885	LMO3;FOXO1;LPL;SFRP2;E2F1
Monoatomic Anion Transmembrane Transport (GO:0098656)		72	5	2.77523	1.80165	0.144202	1	3776;57468;375611;1080;2557	CFTR;SLC26A5;GABRA4;KCNK2;SLC12A5
Signal Transduction in Response to DNA Damage (GO:0042770)		76	5	2.92941	1.70683	0.168994	1	261726;83990;1111;1869;51065	TIPRL;RPS27L;BRIP1;E2F1;CHEK1
Lymphocyte Differentiation (GO:0030098)		76	5	2.92941	1.70683	0.168994	1	5295;973;3714;55636;8581	PIK3R1;CHD7;LY6D;CD79A;JAG2
Regulation of Protein Kinase Activity (GO:0045859)		76	5	2.92941	1.70683	0.168994	1	51422;8826;2268;10221;22843	PPM1E;TRIB1;IQGAP1;FGR;PRKAG2
Negative Regulation of Blood Vessel Morphogenesis (GO:2000181)		77	5	2.96795	1.68466	0.175439	1	575;9723;64102;3818;5176	SEMA3E;ADGRB1;SERPINF1;KLKB1;TNMD
Negative Regulation of Neuron Apoptotic Process (GO:0043524)		77	5	2.96795	1.68466	0.175439	1	468;7466;51804;9723;2907	ATF4;SEMA3E;GRINA;WFS1;SIX4
Negative Regulation of Protein Phosphorylation (GO:0001933)		78	5	3.0065	1.66306	0.181976	1	51422;10221;6423;84327;22843	ZBED3;PPM1E;TRIB1;PRKAG2;SFRP2
Monoatomic Cation Homeostasis (GO:0055080)		81	5	3.12213	1.60147	0.202105	1	7466;57468;55503;525;6337	SCNN1A;WFS1;TRPV6;ATP6V1B1;SLC12A5
Positive Regulation of Synaptic Transmission (GO:0050806)		83	5	3.19922	1.56288	0.215923	1	815;8878;286097;6543;57555	SLC8A2;SQSTM1;CAMK2A;NLGN2;MICU3
Cell Morphogenesis Involved in Neuron Differentiation (GO:0048667)		84	5	3.23777	1.54427	0.22294	1	23542;575;4131;4744;84879	NEFH;MFSD2A;MAP1B;ADGRB1;MAPK8IP2
Regulation of Endothelial Cell Proliferation (GO:0001936)		84	5	3.23777	1.54427	0.22294	1	7857;2258;1960;5155;64102	PDGFB;SCG2;EGR3;FGF13;TNMD
Protein Dephosphorylation (GO:0006470)		87	5	3.3534	1.49102	0.244386	1	5802;22843;378884;5775;29085	PTPN4;NHLRC1;PTPRS;PHPT1;PPM1E
Synapse Assembly (GO:0007416)		87	5	3.3534	1.49102	0.244386	1	2258;57717;57555;57502;2557	NLGN4X;PCDHB16;NLGN2;FGF13;GABRA4
Cellular Response to Hormone Stimulus (GO:0032870)		88	5	3.39195	1.47408	0.251654	1	8912;2099;51208;480;8835	ESR1;CACNA1H;SOCS2;ATP1A4;CLDN18
Lipid Biosynthetic Process (GO:0008610)		88	5	3.39195	1.47408	0.251654	1	5618;4023;283316;23590;154141	CD163L1;PDSS1;LPL;PRLR;MBOAT1
Positive Regulation of Canonical Wnt Signaling Pathway (GO:0090263)		88	5	3.39195	1.47408	0.251654	1	8607;6424;6423;84327;130574	ZBED3;LYPD6;SFRP4;SFRP2;RUVBL1
Regulation of Protein Metabolic Process (GO:0051246)		91	5	3.50758	1.42548	0.273764	1	7466;6469;1636;1435;11187	ACE;SHH;WFS1;PKP3;CSF1
Regulation of Actin Filament-Based Process (GO:0032970)		93	5	3.58467	1.39483	0.288724	1	389;50848;5156;7984;58527	RHOC;PDGFRA;ABRACL;F11R;ARHGEF5
Cellular Response to Chemical Stress (GO:0062197)		96	5	3.70031	1.35124	0.311424	1	8452;2308;468;8428;4482	ATF4;FOXO1;CUL3;MSRA;STK24
Positive Regulation of Protein Catabolic Process (GO:0045732)		98	5	3.7774	1.32366	0.326691	1	7128;2308;51514;79589;25976	RNF128;TNFAIP3;DTL;TIPARP;FOXO1
Organic Anion Transport (GO:0015711)		100	5	3.85449	1.29719	0.342033	1	6518;347734;6005;375611;1080	CFTR;SLC26A5;SLC35B2;SLC2A5;RHAG
T Cell Activation (GO:0042110)		101	5	3.89303	1.28435	0.349724	1	5295;3714;940;55636;1803	PIK3R1;CHD7;DPP4;JAG2;CD28
Regulation of RNA Splicing (GO:0043484)		103	5	3.97012	1.25941	0.365131	1	5295;6428;23210;286676;113146	SRSF3;AHNAK2;ILDR1;PIK3R1;JMJD6
Regulation of Protein Ubiquitination (GO:0031396)		106	5	4.08575	1.22376	0.388256	1	7128;8452;10625;7466;8878	IVNS1ABP;TNFAIP3;SQSTM1;CUL3;WFS1
Cell-Matrix Adhesion (GO:0007160)		106	5	4.08575	1.22376	0.388256	1	7414;1009;7205;3674;3691	ITGB4;VCL;TRIP6;CDH11;ITGA2B
External Encapsulating Structure Organization (GO:0045229)		108	5	4.16284	1.2011	0.403648	1	4321;1290;8190;140766;11174	MIA;COL5A2;ADAMTS14;ADAMTS6;MMP12
Extracellular Structure Organization (GO:0043062)		108	5	4.16284	1.2011	0.403648	1	4321;1290;8190;140766;11174	MIA;COL5A2;ADAMTS14;ADAMTS6;MMP12
Negative Regulation of Inflammatory Response (GO:0050728)		113	5	4.35557	1.14796	0.441879	1	7128;2268;3123;1003;10848	TNFAIP3;HLA-DRB1;FGR;CDH5;PPP1R13L
Positive Regulation of Epithelial Cell Proliferation (GO:0050679)		115	5	4.43266	1.12799	0.457018	1	7857;2258;4321;1960;5155	PDGFB;SCG2;EGR3;FGF13;MMP12
Regulation of Cell Motility (GO:2000145)		115	5	4.43266	1.12799	0.457018	1	2258;2250;9079;29085;4070	LDB2;PHPT1;FGF5;TACSTD2;FGF13
Mitotic Sister Chromatid Segregation (GO:0000070)		115	5	4.43266	1.12799	0.457018	1	2491;8452;26993;9493;79998	AKAP8L;ANKRD53;CUL3;KIF23;CENPI
Negative Regulation of Cell Growth (GO:0030308)		117	5	4.50975	1.10871	0.472041	1	2258;1029;6423;5802;2786	CDKN2A;PTPRS;GNG4;FGF13;SFRP2
Regulation of Protein Phosphorylation (GO:0001932)		131	5	5.04938	0.990221	0.572598	1	2268;3123;84327;2045;146433	ZBED3;IL34;EPHA7;HLA-DRB1;FGR
Protein Glycosylation (GO:0006486)		139	5	5.35774	0.93323	0.625349	1	6487;2651;8705;79087;57171	ALG12;ST3GAL3;DOLPP1;B3GALT4;GCNT2
Cellular Response to Growth Factor Stimulus (GO:0071363)		145	5	5.589	0.894614	0.66224	1	8826;1399;1960;3037;5155	PDGFB;IQGAP1;HAS2;EGR3;CRKL
Epithelium Development (GO:0060429)		149	5	5.74318	0.870597	0.685489	1	6469;7414;84879;51057;3868	MFSD2A;SHH;WDPCP;VCL;KRT16
Positive Regulation of DNA-binding Transcription Factor Activity (GO:0051091)		173	5	6.66826	0.749821	0.801809	1	815;7099;2099;4040;7984	TLR4;ESR1;CAMK2A;LRP6;ARHGEF5
Regulation of Programmed Cell Death (GO:0043067)		173	5	6.66826	0.749821	0.801809	1	8607;7466;8795;27165;23239	GLS2;TNFRSF10B;PHLPP1;WFS1;RUVBL1
Macromolecule Biosynthetic Process (GO:0009059)		182	5	7.01516	0.712742	0.835575	1	3037;5155;285;11224;1982	RPL35;ANGPT2;PDGFB;EIF4G2;HAS2
Defense Response to Virus (GO:0051607)		185	5	7.1308	0.701184	0.845732	1	54512;81786;84993;10410;51251	IFITM3;UBL7;TRIM7;NT5C3A;EXOSC4
Endomembrane System Organization (GO:0010256)		187	5	7.20789	0.693684	0.852211	1	225689;643699;653720;8878;5552	SRGN;GOLGA8M;SQSTM1;GOLGA8N;MAPK15
Regulation of Translation (GO:0006417)		196	5	7.55479	0.661832	0.87863	1	23645;51065;940;11187;1982	RPS27L;EIF4G2;PPP1R15A;PKP3;CD28
Negative Regulation of Response to Wounding (GO:1903035)		24	4	0.925077	4.32397	0.0125541	1	2258;146760;5802;5054	PTPRS;SERPINE1;FGF13;RTN4RL1
Negative Chemotaxis (GO:0050919)		25	4	0.963621	4.15101	0.0145003	1	6091;10371;2045;9723	SEMA3E;EPHA7;ROBO1;SEMA3A
Negative Regulation of Endothelial Cell Apoptotic Process (GO:2000352)		26	4	1.00217	3.99135	0.0166271	1	7128;7857;1003;5054	TNFAIP3;SERPINE1;SCG2;CDH5
Regulation of Platelet Activation (GO:0010543)		27	4	1.04071	3.84353	0.0189391	1	7099;114897;5156;5155	TLR4;PDGFB;PDGFRA;C1QTNF1
Maintenance of Blood-Brain Barrier (GO:0035633)		29	4	1.1178	3.57845	0.0241347	1	50848;7414;1003;84879	MFSD2A;VCL;F11R;CDH5
Negative Regulation of Cell-Matrix Adhesion (GO:0001953)		29	4	1.1178	3.57845	0.0241347	1	1029;4321;9723;5054	CDKN2A;SEMA3E;SERPINE1;MMP12
Positive Regulation of Notch Signaling Pathway (GO:0045747)		30	4	1.15635	3.45917	0.0270245	1	3714;6091;140628;375704	ROBO1;ENHO;GATA5;JAG2
Positive Regulation of Cytokinesis (GO:0032467)		31	4	1.19489	3.34759	0.0301124	1	8452;29127;201161;9493	CENPV;RACGAP1;CUL3;KIF23
Negative Regulation of Microtubule Polymerization or Depolymerization (GO:0031111)		32	4	1.23344	3.24297	0.0334001	1	2258;1003;3925;89795	NAV3;STMN1;FGF13;CDH5
Regulation of Cell Adhesion Mediated by Integrin (GO:0033628)		32	4	1.23344	3.24297	0.0334001	1	1803;6423;1545;5054	SERPINE1;CYP1B1;SFRP2;DPP4
Smoothened Signaling Pathway (GO:0007224)		32	4	1.23344	3.24297	0.0334001	1	6469;57540;221914;132884	GPC2;SHH;DISP3;EVC2
Sarcomere Organization (GO:0045214)		34	4	1.31053	3.05221	0.0405792	1	4621;84033;84665;51804	OBSCN;MYH3;MYPN;SIX4
Embryonic Limb Morphogenesis (GO:0030326)		35	4	1.34907	2.96501	0.0444715	1	4621;6469;56603;51057	SHH;WDPCP;CYP26B1;MYH3
DNA Damage Checkpoint Signaling (GO:0000077)		35	4	1.34907	2.96501	0.0444715	1	261726;83990;1111;1869	TIPRL;BRIP1;E2F1;CHEK1
Cardiac Muscle Cell Action Potential Involved in Contraction (GO:0086002)		37	4	1.42616	2.80473	0.0528605	1	6334;6329;23630;480	SCN4A;ATP1A4;SCN8A;KCNE5
Intrinsic Apoptotic Signaling Pathway by P53 Class Mediator (GO:0072332)		37	4	1.42616	2.80473	0.0528605	1	666;51065;5164;29965	PDK2;BOK;RPS27L;CDIP1
Anterograde Axonal Transport (GO:0008089)		37	4	1.42616	2.80473	0.0528605	1	127829;282991;4747;23095	NEFL;BLOC1S2;KIF1B;ARL8A
Embryonic Skeletal System Development (GO:0048706)		38	4	1.4647	2.73093	0.0573551	1	3235;3214;5156;1750	DLX6;PDGFRA;HOXB4;HOXD9
Negative Regulation of Cell-Substrate Adhesion (GO:0010812)		38	4	1.4647	2.73093	0.0573551	1	1029;2651;9723;4070	CDKN2A;SEMA3E;TACSTD2;GCNT2
Negative Regulation of G Protein-Coupled Receptor Signaling Pathway (GO:0045744)		38	4	1.4647	2.73093	0.0573551	1	636;6091;3925;5997	RGS2;STMN1;BICD1;ROBO1
Phosphatidylinositol 3-Kinase/Protein Kinase B Signal Transduction (GO:0043491)		39	4	1.50325	2.6609	0.0620478	1	5295;3667;222950;57624	IRS1;PIK3R1;NYAP1;NYAP2
Monoatomic Cation Transport (GO:0006812)		40	4	1.54179	2.59438	0.0669366	1	7225;342372;116443;57156	TMEM63C;TRPC6;GRIN3A;PKD1L3
Branching Morphogenesis of an Epithelial Tube (GO:0048754)		40	4	1.54179	2.59438	0.0669366	1	2258;6469;6423;9723	SEMA3E;SHH;FGF13;SFRP2
Organelle Transport Along Microtubule (GO:0072384)		40	4	1.54179	2.59438	0.0669366	1	636;282991;23095;146439	BLOC1S2;BICD1;BICDL2;KIF1B
Positive Regulation of Myeloid Leukocyte Differentiation (GO:0002763)		41	4	1.58034	2.5311	0.072019	1	3123;861;1435;146433	IL34;RUNX1;HLA-DRB1;CSF1
Cellular Response to Glucose Starvation (GO:0042149)		42	4	1.61888	2.47084	0.0772923	1	51422;468;168620;123	ATF4;PLIN2;PRKAG2;BHLHA15
Negative Regulation of Lymphocyte Proliferation (GO:0050672)		42	4	1.61888	2.47084	0.0772923	1	3123;1029;6441;26279	SFTPD;CDKN2A;PLA2G2D;HLA-DRB1
Positive Regulation of Monoatomic Ion Transport (GO:0043270)		43	4	1.65743	2.41338	0.0827533	1	7466;815;84766;7225	CAMK2A;CRACR2A;TRPC6;WFS1
Learning (GO:0007612)		43	4	1.65743	2.41338	0.0827533	1	23542;2258;6543;57502	NLGN4X;SLC8A2;MAPK8IP2;FGF13
Positive Regulation of Receptor-Mediated Endocytosis (GO:0048260)		43	4	1.65743	2.41338	0.0827533	1	636;6424;26585;5054	SERPINE1;BICD1;SFRP4;GREM1
Cellular Response to Ketone (GO:1901655)		43	4	1.65743	2.41338	0.0827533	1	5737;1080;5105;6337	CFTR;PCK1;SCNN1A;PTGFR
Neural Crest Cell Development (GO:0014032)		43	4	1.65743	2.41338	0.0827533	1	3084;6469;10371;9723	SEMA3E;SHH;NRG1;SEMA3A
DNA Integrity Checkpoint Signaling (GO:0031570)		44	4	1.69597	2.35853	0.0883987	1	261726;83990;1111;1869	TIPRL;BRIP1;E2F1;CHEK1
Central Nervous System Neuron Differentiation (GO:0021953)		44	4	1.69597	2.35853	0.0883987	1	4852;4040;1620;4009	LRP6;NPY;LMX1A;BRINP1
Bicellular Tight Junction Assembly (GO:0070830)		44	4	1.69597	2.35853	0.0883987	1	79778;1003;51208;137075	MICALL2;CLDN23;CLDN18;CDH5
Stem Cell Differentiation (GO:0048863)		45	4	1.73452	2.30612	0.0942247	1	6469;4040;3214;4300	SHH;MLLT3;HOXB4;LRP6
Peptidyl-Tyrosine Modification (GO:0018212)		46	4	1.77306	2.25598	0.100227	1	2268;5156;5155;2264	PDGFB;PDGFRA;FGR;FGFR4
Negative Regulation of Small GTPase Mediated Signal Transduction (GO:0051058)		46	4	1.77306	2.25598	0.100227	1	8452;10252;3925;286205	STMN1;SCAI;SPRY1;CUL3
Hexose Metabolic Process (GO:0019318)		47	4	1.81161	2.20798	0.106402	1	80201;5105;5164;390637	PDK2;PCK1;GDPGP1;HKDC1
Intracellular Glucose Homeostasis (GO:0001678)		47	4	1.81161	2.20798	0.106402	1	80201;5295;2308;5105	PIK3R1;FOXO1;PCK1;HKDC1
Positive Regulation of Smooth Muscle Cell Proliferation (GO:0048661)		47	4	1.81161	2.20798	0.106402	1	5295;2258;3725;5155	PDGFB;PIK3R1;FGF13;JUN
Negative Regulation of T Cell Activation (GO:0050868)		48	4	1.85015	2.16198	0.112745	1	3123;1511;6441;26279	SFTPD;PLA2G2D;HLA-DRB1;CTSG
Cilium Movement (GO:0003341)		48	4	1.85015	2.16198	0.112745	1	54768;8632;26256;1770	CABYR;DNAH17;DNAH9;HYDIN
Insulin Receptor Signaling Pathway (GO:0008286)		50	4	1.92724	2.0755	0.125915	1	5295;2308;5164;3667	PDK2;IRS1;PIK3R1;FOXO1
Signal Transduction by P53 Class Mediator (GO:0072331)		51	4	1.96579	2.03481	0.132733	1	666;51065;26585;5164	PDK2;BOK;RPS27L;GREM1
Regulation of Smooth Muscle Cell Proliferation (GO:0048660)		51	4	1.96579	2.03481	0.132733	1	5295;7128;10221;5155	PDGFB;TNFAIP3;PIK3R1;TRIB1
Unsaturated Fatty Acid Metabolic Process (GO:0033559)		51	4	1.96579	2.03481	0.132733	1	79152;8560;158584;1545	DEGS1;CYP1B1;FAAH2;FA2H
Negative Regulation of Neuron Projection Development (GO:0010977)		52	4	2.00433	1.99568	0.139698	1	10371;146760;5802;4168	PTPRS;MCF2;SEMA3A;RTN4RL1
Dicarboxylic Acid Metabolic Process (GO:0043648)		52	4	2.00433	1.99568	0.139698	1	728294;4967;57717;5105	PCDHB16;PCK1;OGDH;D2HGDH
Cellular Response to Fibroblast Growth Factor Stimulus (GO:0044344)		52	4	2.00433	1.99568	0.139698	1	2258;1960;2264;2250	FGF5;FGFR4;EGR3;FGF13
Positive Regulation of Leukocyte Chemotaxis (GO:0002690)		54	4	2.08142	1.92176	0.154051	1	1435;5228;5054;146433	PGF;IL34;SERPINE1;CSF1
Purine Ribonucleotide Metabolic Process (GO:0009150)		55	4	2.11997	1.88682	0.161428	1	8460;4907;4621;57089	NT5E;TPST1;ENTPD7;MYH3
Regulation of Blood Vessel Endothelial Cell Migration (GO:0043535)		55	4	2.11997	1.88682	0.161428	1	958;2258;5155;285	ANGPT2;PDGFB;CD40;FGF13
Regulation of Mitotic Nuclear Division (GO:0007088)		55	4	2.11997	1.88682	0.161428	1	1111;940;5155;286151	PDGFB;FBXO43;CHEK1;CD28
Cellular Response to Alcohol (GO:0097306)		55	4	2.11997	1.88682	0.161428	1	4040;5737;1080;6337	CFTR;LRP6;SCNN1A;PTGFR
ATP Metabolic Process (GO:0046034)		56	4	2.15851	1.85313	0.168931	1	80201;4907;51422;4621	NT5E;PRKAG2;MYH3;HKDC1
Negative Regulation of Protein Modification by Small Protein Conjugation or Removal (GO:1903321)		56	4	2.15851	1.85313	0.168931	1	7128;10625;1029;8878	IVNS1ABP;CDKN2A;TNFAIP3;SQSTM1
Regulation of Multicellular Organismal Development (GO:2000026)		56	4	2.15851	1.85313	0.168931	1	8607;83444;29127;11187	INO80B;RACGAP1;PKP3;RUVBL1
Cellular Response to Calcium Ion (GO:0071277)		56	4	2.15851	1.85313	0.168931	1	8826;286097;6261;84059	ADGRV1;IQGAP1;RYR1;MICU3
Negative Regulation of Protein Kinase Activity (GO:0006469)		56	4	2.15851	1.85313	0.168931	1	51422;10221;4040;22843	PPM1E;TRIB1;LRP6;PRKAG2
Regulation of Calcium Ion Transport (GO:0051924)		57	4	2.19706	1.82062	0.176554	1	7466;815;84766;7225	CAMK2A;CRACR2A;TRPC6;WFS1
Neuron Migration (GO:0001764)		57	4	2.19706	1.82062	0.176554	1	2258;10371;4131;9723	SEMA3E;MAP1B;SEMA3A;FGF13
Regulation of SMAD Protein Signal Transduction (GO:0060390)		59	4	2.27415	1.7589	0.192137	1	392255;1399;26585;8483	GDF6;GREM1;CRKL;CILP
Intermediate Filament Organization (GO:0045109)		59	4	2.27415	1.7589	0.192137	1	4747;4744;3868;3855	NEFH;NEFL;KRT7;KRT16
Regulation of Neurogenesis (GO:0050767)		61	4	2.35124	1.70123	0.208132	1	51441;4321;84667;5176	SERPINF1;YTHDF2;HES7;MMP12
Negative Regulation of Metabolic Process (GO:0009892)		61	4	2.35124	1.70123	0.208132	1	468;7099;341;5334	TLR4;ATF4;PLCL1;APOC1
Defense Response to Gram-negative Bacterium (GO:0050829)		61	4	2.35124	1.70123	0.208132	1	4852;7099;1511;5054	TLR4;SERPINE1;NPY;CTSG
Anterior/Posterior Pattern Specification (GO:0009952)		62	4	2.38978	1.67379	0.216269	1	84667;3235;497189;3214	TIFAB;HOXB4;HOXD9;HES7
Granulocyte Chemotaxis (GO:0071621)		62	4	2.38978	1.67379	0.216269	1	7857;4283;6367;6357	CCL13;CCL22;SCG2;CXCL9
Canonical Wnt Signaling Pathway (GO:0060070)		63	4	2.42833	1.64723	0.224491	1	51384;6424;6423;4040	SFRP4;LRP6;SFRP2;WNT16
Regulation of miRNA Transcription (GO:1902893)		64	4	2.46687	1.62149	0.232792	1	2258;2099;3725;5155	ESR1;PDGFB;FGF13;JUN
Phospholipid Metabolic Process (GO:0006644)		64	4	2.46687	1.62149	0.232792	1	57678;4023;26279;154141	PLA2G2D;LPL;GPAM;MBOAT1
Positive Regulation of Endothelial Cell Proliferation (GO:0001938)		69	4	2.6596	1.50399	0.275287	1	7857;2258;1960;5155	PDGFB;SCG2;EGR3;FGF13
Negative Regulation of Supramolecular Fiber Organization (GO:1902904)		71	4	2.73668	1.46162	0.292642	1	2258;1003;3925;89795	NAV3;STMN1;FGF13;CDH5
Cytoskeleton-Dependent Cytokinesis (GO:0061640)		71	4	2.73668	1.46162	0.292642	1	29127;389;3925;9493	RHOC;STMN1;RACGAP1;KIF23
Regulation of Neuron Differentiation (GO:0045664)		72	4	2.77523	1.44132	0.301374	1	147040;4058;57540;85446	DISP3;LTK;KCTD11;ZFHX2
Regulation of Plasma Membrane Bounded Cell Projection Assembly (GO:0120032)		72	4	2.77523	1.44132	0.301374	1	225689;2596;51057;7813	GAP43;WDPCP;EVI5;MAPK15
Import Into Nucleus (GO:0051170)		75	4	2.89086	1.38367	0.327724	1	4927;4321;8428;64901	RANBP17;NUP88;STK24;MMP12
Organophosphate Metabolic Process (GO:0019637)		76	4	2.92941	1.36546	0.336542	1	80201;4023;26279;27304	PLA2G2D;MOCS3;LPL;HKDC1
Regulation of Cell Cycle G1/S Phase Transition (GO:1902806)		77	4	2.96795	1.34773	0.34537	1	1869;1029;11187;4330	CDKN2A;MN1;PKP3;E2F1
Cholesterol Homeostasis (GO:0042632)		78	4	3.0065	1.33045	0.354202	1	3638;4023;2264;57540	DISP3;FGFR4;LPL;INSIG1
Negative Regulation of Cell Cycle (GO:0045786)		78	4	3.0065	1.33045	0.354202	1	1029;864;1620;286151	CDKN2A;FBXO43;RUNX3;BRINP1
Regulation of Cilium Assembly (GO:1902017)		78	4	3.0065	1.33045	0.354202	1	225689;51057;7813;23329	TBC1D30;WDPCP;EVI5;MAPK15
Sphingolipid Metabolic Process (GO:0006665)		78	4	3.0065	1.33045	0.354202	1	79152;8560;130367;79993	ELOVL7;DEGS1;SGPP2;FA2H
Sterol Homeostasis (GO:0055092)		79	4	3.04504	1.31361	0.363034	1	3638;4023;2264;57540	DISP3;FGFR4;LPL;INSIG1
Regulation of T Cell Proliferation (GO:0042129)		79	4	3.04504	1.31361	0.363034	1	3123;940;6441;26279	SFTPD;PLA2G2D;HLA-DRB1;CD28
Wound Healing (GO:0042060)		79	4	3.04504	1.31361	0.363034	1	3084;2258;4321;5156	PDGFRA;NRG1;FGF13;MMP12
Positive Regulation of JNK Cascade (GO:0046330)		80	4	3.08359	1.29719	0.371862	1	84766;51384;10371;60401	EDA2R;CRACR2A;SEMA3A;WNT16
Protein Tetramerization (GO:0051262)		80	4	3.08359	1.29719	0.371862	1	3123;57717;27165;6261	PCDHB16;GLS2;HLA-DRB1;RYR1
Protein Import Into Nucleus (GO:0006606)		80	4	3.08359	1.29719	0.371862	1	4927;4321;8428;64901	RANBP17;NUP88;STK24;MMP12
Integrin-Mediated Signaling Pathway (GO:0007229)		82	4	3.16068	1.26555	0.389486	1	8452;2268;3674;3691	ITGB4;CUL3;FGR;ITGA2B
Sensory Perception of Mechanical Stimulus (GO:0050954)		82	4	3.16068	1.26555	0.389486	1	7466;3198;375611;525	SLC26A5;WFS1;HOXA1;ATP6V1B1
B Cell Activation (GO:0042113)		83	4	3.19922	1.2503	0.398274	1	1137;958;5295;973	PIK3R1;CD40;CHRNA4;CD79A
Wnt Signaling Pathway (GO:0016055)		83	4	3.19922	1.2503	0.398274	1	51384;6424;6423;4040	SFRP4;LRP6;SFRP2;WNT16
Negative Regulation of Transforming Growth Factor Beta Receptor Signaling Pathway (GO:0030512)		84	4	3.23777	1.23542	0.40704	1	23089;10252;8819;8483	SPRY1;PEG10;SAP30;CILP
Positive Regulation of Endocytosis (GO:0045807)		85	4	3.27631	1.22088	0.415782	1	636;5054;6441;10326	SFTPD;SERPINE1;BICD1;SIRPB1
Sensory Perception of Sound (GO:0007605)		86	4	3.31486	1.20669	0.424494	1	7466;3198;375611;525	SLC26A5;WFS1;HOXA1;ATP6V1B1
Regulation of Epithelial Cell Proliferation (GO:0050678)		90	4	3.46904	1.15306	0.458984	1	6423;51804;864;130367	RUNX3;SFRP2;SGPP2;SIX4
Positive Regulation of Cell Adhesion (GO:0045785)		90	4	3.46904	1.15306	0.458984	1	3084;6423;5155;11187	PDGFB;NRG1;SFRP2;PKP3
Regulation of Protein Localization (GO:0032880)		93	4	3.58467	1.11586	0.484382	1	6469;11187;51057;221914	GPC2;SHH;WDPCP;PKP3
mRNA Metabolic Process (GO:0016071)		95	4	3.66176	1.09237	0.501047	1	51441;1797;54888;26993	DXO;NSUN2;AKAP8L;YTHDF2
Cellular Response to Transforming Growth Factor Beta Stimulus (GO:0071560)		97	4	3.73885	1.06985	0.517474	1	1399;3725;1003;2651	CRKL;GCNT2;CDH5;JUN
Positive Regulation of Protein Localization (GO:1903829)		98	4	3.7774	1.05893	0.525593	1	636;1029;57555;11187	CDKN2A;BICD1;NLGN2;PKP3
Regulation of Actin Cytoskeleton Organization (GO:0032956)		100	4	3.85449	1.03775	0.541629	1	389;50848;5156;7984	RHOC;PDGFRA;F11R;ARHGEF5
Positive Regulation of Protein-Containing Complex Assembly (GO:0031334)		101	4	3.89303	1.02748	0.549542	1	3084;7099;389;1003	RHOC;TLR4;NRG1;CDH5
Cell Junction Assembly (GO:0034329)		101	4	3.89303	1.02748	0.549542	1	57717;1009;1003;57555	PCDHB16;NLGN2;CDH11;CDH5
Lipid Transport (GO:0006869)		107	4	4.1243	0.969862	0.595455	1	154664;84879;83758;2172	MFSD2A;FABP6;ABCA13;RBP5
Positive Regulation of Cellular Component Organization (GO:0051130)		107	4	4.1243	0.969862	0.595455	1	3084;389;1003;861	RHOC;NRG1;RUNX1;CDH5
Regulation of Wnt Signaling Pathway (GO:0030111)		108	4	4.16284	0.960881	0.602832	1	7128;6424;6423;11197	WIF1;TNFAIP3;SFRP4;SFRP2
Negative Regulation of Growth (GO:0045926)		110	4	4.23993	0.943411	0.617341	1	1029;6423;4496;2786	CDKN2A;GNG4;SFRP2;MT1H
Transforming Growth Factor Beta Receptor Superfamily Signaling Pathway (GO:0141091)		112	4	4.31702	0.926564	0.631514	1	392255;3725;1003;2651	GDF6;GCNT2;CDH5;JUN
Regulation of Transforming Growth Factor Beta Receptor Signaling Pathway (GO:0017015)		116	4	4.4712	0.894614	0.658832	1	23089;10252;8819;8483	SPRY1;PEG10;SAP30;CILP
Negative Regulation of Catabolic Process (GO:0009895)		117	4	4.50975	0.886967	0.665444	1	1029;341;257397;1982	CDKN2A;EIF4G2;TAB3;APOC1
Regulation of Protein-Containing Complex Assembly (GO:0043254)		119	4	4.58684	0.87206	0.678405	1	225689;3084;389;1003	RHOC;NRG1;MAPK15;CDH5
Regulation of Mitotic Cell Cycle (GO:0007346)		121	4	4.66393	0.857646	0.691012	1	8826;1620;286151;6990	DYNLT3;IQGAP1;FBXO43;BRINP1
Regulation of Protein Catabolic Process (GO:0042176)		124	4	4.77956	0.836897	0.709258	1	7128;2308;51514;25976	TNFAIP3;DTL;TIPARP;FOXO1
Positive Regulation of Defense Response (GO:0031349)		125	4	4.81811	0.830202	0.715163	1	7099;4023;5054;90678	TLR4;SERPINE1;LRSAM1;LPL
Fatty Acid Metabolic Process (GO:0006631)		127	4	4.8952	0.817128	0.726708	1	79152;4023;5095;79746	PCCA;ECHDC3;LPL;FA2H
Circulatory System Development (GO:0072359)		128	4	4.93374	0.810744	0.732349	1	2702;6469;5155;55803	ADAP2;PDGFB;SHH;GJA5
Regulation of Cell Adhesion (GO:0030155)		138	4	5.31919	0.751994	0.784	1	3084;51441;2045;11187	NRG1;EPHA7;YTHDF2;PKP3
Regulation of Cell Cycle Process (GO:0010564)		143	4	5.51191	0.725701	0.806691	1	1111;51441;29127;286151	RACGAP1;YTHDF2;FBXO43;CHEK1
Regulation of Cold-Induced Thermogenesis (GO:0120161)		146	4	5.62755	0.710789	0.819351	1	468;7099;5618;5334	TLR4;ATF4;PLCL1;PRLR
Regulation of Macromolecule Biosynthetic Process (GO:0010556)		152	4	5.85882	0.682732	0.842626	1	55636;6469;6543;25893	SLC8A2;SHH;CHD7;TRIM58
Regulation of Cellular Component Organization (GO:0051128)		156	4	6.013	0.665226	0.856702	1	8835;55119;4300;51090	PRPF38B;MLLT3;SOCS2;PLLP
Cellular Response to Nitrogen Compound (GO:1901699)		161	4	6.20572	0.644566	0.872779	1	7099;1080;57559;23641	TLR4;LDOC1;STAMBPL1;CFTR
Positive Regulation of Protein Phosphorylation (GO:0001934)		165	4	6.3599	0.628941	0.884499	1	8826;3123;5155;146433	PDGFB;IL34;HLA-DRB1;IQGAP1
Nitrogen Compound Transport (GO:0071705)		166	4	6.39845	0.625152	0.887279	1	3776;6005;7439;53353	BEST1;LRP1B;KCNK2;RHAG
Double-Strand Break Repair (GO:0006302)		166	4	6.39845	0.625152	0.887279	1	83990;10635;25885;9985	POLR1A;RAD51AP1;BRIP1;REC8
Transcription by RNA Polymerase II (GO:0006366)		187	4	7.20789	0.554948	0.933531	1	468;2960;51513;80227	ATF4;PAAF1;ETV7;GTF2E1
Negative Regulation of Muscle Cell Apoptotic Process (GO:0010656)		13	3	0.501083	5.98703	0.0121979	1	2099;4040;27076	LYPD3;ESR1;LRP6
Negative Regulation of Cell Activation (GO:0050866)		13	3	0.501083	5.98703	0.0121979	1	114897;5156;5155	PDGFB;PDGFRA;C1QTNF1
Sensory Perception of Taste (GO:0050909)		14	3	0.539628	5.55939	0.0150871	1	342372;6337;9311	SCNN1A;PKD1L3;ASIC3
Regulation of Monocyte Differentiation (GO:0045655)		15	3	0.578173	5.18876	0.0183286	1	3123;1435;146433	IL34;HLA-DRB1;CSF1
Mitochondrial Calcium Ion Homeostasis (GO:0051560)		15	3	0.578173	5.18876	0.0183286	1	286097;118987;5910	MICU3;PDZD8;RAP1GDS1
Regulation of Plasminogen Activation (GO:0010755)		16	3	0.616718	4.86446	0.0219252	1	861;5054;7123	SERPINE1;CLEC3B;RUNX1
Negative Regulation of Platelet Activation (GO:0010544)		16	3	0.616718	4.86446	0.0219252	1	114897;5156;5155	PDGFB;PDGFRA;C1QTNF1
Regulation of Establishment of Endothelial Barrier (GO:1903140)		16	3	0.616718	4.86446	0.0219252	1	50848;7414;1003	VCL;F11R;CDH5
Regulation of Inflammatory Response to Antigenic Stimulus (GO:0002861)		17	3	0.655263	4.57832	0.025878	1	2268;3123;26279	PLA2G2D;HLA-DRB1;FGR
Regulation of Ventricular Cardiac Muscle Cell Membrane Repolarization (GO:0060307)		17	3	0.655263	4.57832	0.025878	1	2702;23630;9722	NOS1AP;GJA5;KCNE5
Mesoderm Development (GO:0007498)		17	3	0.655263	4.57832	0.025878	1	84667;6911;4232	HES7;MEST;TBX6
Negative Regulation of Rho Protein Signal Transduction (GO:0035024)		17	3	0.655263	4.57832	0.025878	1	8452;3925;286205	STMN1;SCAI;CUL3
Multicellular Organismal-Level Water Homeostasis (GO:0050891)		17	3	0.655263	4.57832	0.025878	1	7466;1080;6337	CFTR;SCNN1A;WFS1
Positive Regulation of Glucose Metabolic Process (GO:0010907)		18	3	0.693807	4.32397	0.0301859	1	51422;2308;3667	IRS1;FOXO1;PRKAG2
Regulation of Smooth Muscle Cell Migration (GO:0014910)		18	3	0.693807	4.32397	0.0301859	1	10221;5155;5054	PDGFB;SERPINE1;TRIB1
Maintenance of Gastrointestinal Epithelium (GO:0030277)		18	3	0.693807	4.32397	0.0301859	1	7099;56667;4588	TLR4;MUC6;MUC13
Eosinophil Chemotaxis (GO:0048245)		18	3	0.693807	4.32397	0.0301859	1	7857;6367;6357	CCL13;CCL22;SCG2
Eosinophil Migration (GO:0072677)		18	3	0.693807	4.32397	0.0301859	1	7857;6367;6357	CCL13;CCL22;SCG2
Glycogen Metabolic Process (GO:0005977)		19	3	0.732352	4.09639	0.0348463	1	51422;378884;8908	NHLRC1;GYG2;PRKAG2
Membrane Repolarization (GO:0086009)		19	3	0.732352	4.09639	0.0348463	1	3751;23630;480	KCND2;ATP1A4;KCNE5
Limb Morphogenesis (GO:0035108)		19	3	0.732352	4.09639	0.0348463	1	4621;6469;56603	SHH;CYP26B1;MYH3
Cardiac Epithelial to Mesenchymal Transition (GO:0060317)		19	3	0.732352	4.09639	0.0348463	1	10439;3037;10252	SPRY1;HAS2;OLFM1
Regulation of Synaptic Transmission, GABAergic (GO:0032228)		19	3	0.732352	4.09639	0.0348463	1	3776;5334;57555	PLCL1;NLGN2;KCNK2
Cellular Response to Fatty Acid (GO:0071398)		20	3	0.770897	3.89157	0.0398551	1	3776;4023;3667	IRS1;LPL;KCNK2
Regulation of Cardiac Conduction (GO:1903779)		20	3	0.770897	3.89157	0.0398551	1	2702;6543;157378	SLC8A2;TMEM65;GJA5
Bicarbonate Transport (GO:0015701)		20	3	0.770897	3.89157	0.0398551	1	6005;375611;1080	CFTR;SLC26A5;RHAG
Negative Regulation of SMAD Protein Signal Transduction (GO:0060392)		21	3	0.809442	3.70626	0.0452069	1	1399;26585;8483	GREM1;CRKL;CILP
Positive Regulation of Vascular Associated Smooth Muscle Cell Proliferation (GO:1904707)		21	3	0.809442	3.70626	0.0452069	1	2258;3725;5155	PDGFB;FGF13;JUN
Regulation of Cardiac Muscle Cell Membrane Repolarization (GO:0099623)		21	3	0.809442	3.70626	0.0452069	1	2702;23630;9722	NOS1AP;GJA5;KCNE5
Regulation of Cardiac Muscle Cell Proliferation (GO:0060043)		21	3	0.809442	3.70626	0.0452069	1	3084;2258;861	NRG1;RUNX1;FGF13
Establishment of Skin Barrier (GO:0061436)		21	3	0.809442	3.70626	0.0452069	1	79152;3925;3868	STMN1;KRT16;FA2H
Monocarboxylic Acid Catabolic Process (GO:0072329)		22	3	0.847987	3.53779	0.050895	1	2184;79152;56603	FAH;CYP26B1;FA2H
Artery Development (GO:0060840)		22	3	0.847987	3.53779	0.050895	1	2702;6091;3198	ROBO1;GJA5;HOXA1
Negative Regulation of Interleukin-2 Production (GO:0032703)		23	3	0.886532	3.38397	0.0569117	1	7128;6441;89795	NAV3;SFTPD;TNFAIP3
Response to Hexose (GO:0009746)		23	3	0.886532	3.38397	0.0569117	1	6518;84327;4023	ZBED3;LPL;SLC2A5
Ear Morphogenesis (GO:0042471)		23	3	0.886532	3.38397	0.0569117	1	55636;497189;3198	TIFAB;CHD7;HOXA1
Skin Epidermis Development (GO:0098773)		23	3	0.886532	3.38397	0.0569117	1	79152;3925;3868	STMN1;KRT16;FA2H
Calcium Ion Import Across Plasma Membrane (GO:0098703)		24	3	0.925077	3.24297	0.0632485	1	8912;55503;6543	SLC8A2;CACNA1H;TRPV6
Negative Regulation of Extrinsic Apoptotic Signaling Pathway via Death Domain Receptors (GO:1902042)		24	3	0.925077	3.24297	0.0632485	1	7128;5054;2907	TNFAIP3;SERPINE1;GRINA
Regulation of Kinase Activity (GO:0043549)		24	3	0.925077	3.24297	0.0632485	1	2268;3123;9079	LDB2;HLA-DRB1;FGR
Metanephros Development (GO:0001656)		24	3	0.925077	3.24297	0.0632485	1	392255;6469;51804	SHH;GDF6;SIX4
Sulfur Compound Transport (GO:0072348)		24	3	0.925077	3.24297	0.0632485	1	29127;347734;375611	RACGAP1;SLC26A5;SLC35B2
Dopaminergic Neuron Differentiation (GO:0071542)		25	3	0.963621	3.11326	0.069896	1	6469;4040;4009	SHH;LRP6;LMX1A
Steroid Biosynthetic Process (GO:0006694)		25	3	0.963621	3.11326	0.069896	1	51422;5618;283316	CD163L1;PRKAG2;PRLR
Calcium Ion Import Into Cytosol (GO:1902656)		25	3	0.963621	3.11326	0.069896	1	8912;55503;6543	SLC8A2;CACNA1H;TRPV6
Lymphocyte Proliferation (GO:0046651)		25	3	0.963621	3.11326	0.069896	1	958;973;3070	HELLS;CD40;CD79A
Positive Regulation of Rho Protein Signal Transduction (GO:0035025)		25	3	0.963621	3.11326	0.069896	1	50848;6091;55119	PRPF38B;ROBO1;F11R
Negative Regulation of Axonogenesis (GO:0050771)		25	3	0.963621	3.11326	0.069896	1	2258;5802;4168	PTPRS;MCF2;FGF13
Regulation of Microtubule Depolymerization (GO:0031114)		26	3	1.00217	2.99352	0.0768441	1	2258;4131;89795	NAV3;MAP1B;FGF13
ER-nucleus Signaling Pathway (GO:0006984)		26	3	1.00217	2.99352	0.0768441	1	468;7466;3638	ATF4;INSIG1;WFS1
Regulation of Platelet Aggregation (GO:0090330)		26	3	1.00217	2.99352	0.0768441	1	50848;114897;1511	C1QTNF1;F11R;CTSG
Intrinsic Apoptotic Signaling Pathway in Response to Endoplasmic Reticulum Stress (GO:0070059)		27	3	1.04071	2.88264	0.0840823	1	23645;468;8795	ATF4;TNFRSF10B;PPP1R15A
in Utero Embryonic Development (GO:0001701)		27	3	1.04071	2.88264	0.0840823	1	55636;80864;5155	PDGFB;CHD7;EGFL8
Inner Ear Morphogenesis (GO:0042472)		27	3	1.04071	2.88264	0.0840823	1	55636;497189;3198	TIFAB;CHD7;HOXA1
Positive Regulation of Fibroblast Proliferation (GO:0048146)		27	3	1.04071	2.88264	0.0840823	1	1869;5156;5155	PDGFB;PDGFRA;E2F1
Regulation of DNA Biosynthetic Process (GO:2000278)		27	3	1.04071	2.88264	0.0840823	1	2258;5155;2264	PDGFB;FGFR4;FGF13
Carbohydrate Biosynthetic Process (GO:0016051)		27	3	1.04071	2.88264	0.0840823	1	6487;3037;8705	ST3GAL3;B3GALT4;HAS2
Regulation of Toll-Like Receptor 4 Signaling Pathway (GO:0034143)		28	3	1.07926	2.77969	0.0915993	1	5295;7128;8878	TNFAIP3;PIK3R1;SQSTM1
Hematopoietic Progenitor Cell Differentiation (GO:0002244)		28	3	1.07926	2.77969	0.0915993	1	6469;3214;4300	SHH;MLLT3;HOXB4
Sterol Biosynthetic Process (GO:0016126)		28	3	1.07926	2.77969	0.0915993	1	51422;3638;1718	DHCR24;INSIG1;PRKAG2
Regulation of Cardiac Muscle Cell Action Potential (GO:0098901)		28	3	1.07926	2.77969	0.0915993	1	2702;2258;9722	NOS1AP;GJA5;FGF13
Regulation of Calcium Ion-Dependent Exocytosis (GO:0017158)		28	3	1.07926	2.77969	0.0915993	1	341359;55503;6804	SYT10;TRPV6;STX1A
Negative Regulation of Ossification (GO:0030279)		29	3	1.1178	2.68384	0.0993837	1	26585;5552;651	SRGN;BMP3;GREM1
Positive Regulation of Locomotion (GO:0040017)		29	3	1.1178	2.68384	0.0993837	1	5156;5155;29085	PDGFB;PDGFRA;PHPT1
Cell-Substrate Junction Assembly (GO:0007044)		29	3	1.1178	2.68384	0.0993837	1	1009;7205;3691	ITGB4;TRIP6;CDH11
Negative Regulation of Notch Signaling Pathway (GO:0045746)		29	3	1.1178	2.68384	0.0993837	1	51441;8788;65989	DLK1;YTHDF2;DLK2
Morphogenesis of an Epithelium (GO:0002009)		29	3	1.1178	2.68384	0.0993837	1	7414;27031;3868	NPHP3;VCL;KRT16
Regulation of Cell Morphogenesis (GO:0022604)		30	3	1.15635	2.59438	0.107424	1	84879;118987;832	MFSD2A;CAPZB;PDZD8
Regulation of Gluconeogenesis (GO:0006111)		30	3	1.15635	2.59438	0.107424	1	51422;2308;5164	PDK2;FOXO1;PRKAG2
Glycosphingolipid Biosynthetic Process (GO:0006688)		30	3	1.15635	2.59438	0.107424	1	6487;8705;7368	ST3GAL3;B3GALT4;UGT8
Apoptotic Mitochondrial Changes (GO:0008637)		31	3	1.19489	2.51069	0.115707	1	666;815;79017	BOK;CAMK2A;GGCT
Membrane Depolarization (GO:0051899)		31	3	1.19489	2.51069	0.115707	1	1137;1029;9311	CDKN2A;CHRNA4;ASIC3
Mesenchymal Cell Migration (GO:0090497)		31	3	1.19489	2.51069	0.115707	1	6469;10371;9723	SEMA3E;SHH;SEMA3A
Modulation of Excitatory Postsynaptic Potential (GO:0098815)		31	3	1.19489	2.51069	0.115707	1	6543;57555;57502	NLGN4X;SLC8A2;NLGN2
Purine Ribonucleoside Triphosphate Metabolic Process (GO:0009205)		32	3	1.23344	2.43223	0.124221	1	4907;4621;57089	NT5E;ENTPD7;MYH3
Calcium Ion Import (GO:0070509)		32	3	1.23344	2.43223	0.124221	1	8912;55503;6543	SLC8A2;CACNA1H;TRPV6
Regulation of Extrinsic Apoptotic Signaling Pathway via Death Domain Receptors (GO:1902041)		32	3	1.23344	2.43223	0.124221	1	7128;5054;2907	TNFAIP3;SERPINE1;GRINA
Respiratory System Development (GO:0060541)		32	3	1.23344	2.43223	0.124221	1	55636;6469;27031	SHH;NPHP3;CHD7
Embryonic Skeletal System Morphogenesis (GO:0048704)		32	3	1.23344	2.43223	0.124221	1	3235;3214;5156	PDGFRA;HOXB4;HOXD9
Response to Estrogen (GO:0043627)		32	3	1.23344	2.43223	0.124221	1	2099;51208;2947	ESR1;GSTM3;CLDN18
JNK Cascade (GO:0007254)		33	3	1.27198	2.35853	0.132955	1	23542;10221;1399	TRIB1;MAPK8IP2;CRKL
Positive Regulation of Carbohydrate Metabolic Process (GO:0045913)		33	3	1.27198	2.35853	0.132955	1	5745;5155;3667	IRS1;PDGFB;PTH1R
Vasculogenesis (GO:0001570)		33	3	1.27198	2.35853	0.132955	1	6469;80864;3037	SHH;EGFL8;HAS2
Acetylcholine Receptor Signaling Pathway (GO:0095500)		33	3	1.27198	2.35853	0.132955	1	1137;6001;85397	RGS10;CHRNA4;RGS8
Positive Regulation of Receptor Signaling Pathway via JAK-STAT (GO:0046427)		33	3	1.27198	2.35853	0.132955	1	815;5618;1545	CAMK2A;CYP1B1;PRLR
Regulation of Developmental Growth (GO:0048638)		33	3	1.27198	2.35853	0.132955	1	51804;10439;84879	MFSD2A;OLFM1;SIX4
Negative Regulation of Developmental Growth (GO:0048640)		33	3	1.27198	2.35853	0.132955	1	2258;5802;23286	PTPRS;FGF13;WWC1
Signal Release From Synapse (GO:0099643)		33	3	1.27198	2.35853	0.132955	1	6616;341359;6804	SNAP25;SYT10;STX1A
Regulation of D-glucose Import (GO:0046324)		34	3	1.31053	2.28916	0.141894	1	51422;5295;3667	IRS1;PIK3R1;PRKAG2
Cellular Response to Hydrogen Peroxide (GO:0070301)		34	3	1.31053	2.28916	0.141894	1	7128;1545;55119	PRPF38B;TNFAIP3;CYP1B1
Positive Regulation of Mitotic Nuclear Division (GO:0045840)		34	3	1.31053	2.28916	0.141894	1	8452;940;5155	PDGFB;CUL3;CD28
Adherens Junction Organization (GO:0034332)		34	3	1.31053	2.28916	0.141894	1	7414;1009;1003	VCL;CDH11;CDH5
Regulation of p38MAPK Cascade (GO:1900744)		35	3	1.34907	2.22375	0.151028	1	392255;5187;23239	GDF6;PHLPP1;PER1
Negative Regulation of Myeloid Leukocyte Differentiation (GO:0002762)		35	3	1.34907	2.22375	0.151028	1	7099;861;4982	TLR4;TNFRSF11B;RUNX1
Striated Muscle Tissue Development (GO:0014706)		35	3	1.34907	2.22375	0.151028	1	51804;140628;51312	SLC25A37;GATA5;SIX4
Carboxylic Acid Metabolic Process (GO:0019752)		35	3	1.34907	2.22375	0.151028	1	5095;5446;5105	PON3;PCK1;PCCA
Neurotransmitter Secretion (GO:0007269)		35	3	1.34907	2.22375	0.151028	1	6616;341359;6804	SNAP25;SYT10;STX1A
Neural Crest Cell Migration (GO:0001755)		35	3	1.34907	2.22375	0.151028	1	6469;10371;9723	SEMA3E;SHH;SEMA3A
Regulation of Vascular Associated Smooth Muscle Cell Proliferation (GO:1904705)		36	3	1.38761	2.16198	0.160342	1	2258;3725;5155	PDGFB;FGF13;JUN
Skeletal Muscle Tissue Development (GO:0007519)		36	3	1.38761	2.16198	0.160342	1	51804;6261;51312	SLC25A37;RYR1;SIX4
Regulation of Cytosolic Calcium Ion Concentration (GO:0051480)		36	3	1.38761	2.16198	0.160342	1	6543;6261;7225	SLC8A2;RYR1;TRPC6
Acylglycerol Metabolic Process (GO:0006639)		36	3	1.38761	2.16198	0.160342	1	4023;341;1607	DGKB;LPL;APOC1
Negative Regulation of Transport (GO:0051051)		36	3	1.38761	2.16198	0.160342	1	3084;6424;90678	NRG1;SFRP4;LRSAM1
Fatty Acid Transport (GO:0015908)		37	3	1.42616	2.10355	0.169826	1	84879;83758;2172	MFSD2A;FABP6;RBP5
Aortic Valve Morphogenesis (GO:0003180)		37	3	1.42616	2.10355	0.169826	1	1009;6091;140628	ROBO1;CDH11;GATA5
Negative Regulation of Endothelial Cell Migration (GO:0010596)		37	3	1.42616	2.10355	0.169826	1	2258;575;285	ANGPT2;ADGRB1;FGF13
Cardiac Muscle Cell Action Potential (GO:0086001)		37	3	1.42616	2.10355	0.169826	1	6334;6329;480	SCN4A;ATP1A4;SCN8A
Neuron Projection Extension (GO:1990138)		37	3	1.42616	2.10355	0.169826	1	8826;10371;4131	MAP1B;IQGAP1;SEMA3A
Fibroblast Growth Factor Receptor Signaling Pathway (GO:0008543)		38	3	1.4647	2.04819	0.179466	1	2258;2264;2250	FGF5;FGFR4;FGF13
Negative Regulation of T Cell Proliferation (GO:0042130)		38	3	1.4647	2.04819	0.179466	1	3123;6441;26279	SFTPD;PLA2G2D;HLA-DRB1
Negative Regulation of Kinase Activity (GO:0033673)		38	3	1.4647	2.04819	0.179466	1	51422;10221;22843	PPM1E;TRIB1;PRKAG2
Glycosphingolipid Metabolic Process (GO:0006687)		38	3	1.4647	2.04819	0.179466	1	6487;8705;7368	ST3GAL3;B3GALT4;UGT8
Regulation of Neurotransmitter Secretion (GO:0046928)		39	3	1.50325	1.99568	0.189251	1	815;27345;286097	CAMK2A;KCNMB4;MICU3
Keratinocyte Differentiation (GO:0030216)		39	3	1.50325	1.99568	0.189251	1	51384;3868;6768	ST14;WNT16;KRT16
Axonal Transport (GO:0098930)		39	3	1.50325	1.99568	0.189251	1	127829;282991;4747	NEFL;BLOC1S2;ARL8A
Regulation of Axon Extension (GO:0030516)		39	3	1.50325	1.99568	0.189251	1	10439;10371;5802	PTPRS;SEMA3A;OLFM1
Calcium-Dependent Cell-Cell Adhesion via Plasma Membrane Cell Adhesion Molecules (GO:0016339)		39	3	1.50325	1.99568	0.189251	1	57717;1009;1003	PCDHB16;CDH11;CDH5
Positive Regulation of DNA Biosynthetic Process (GO:2000573)		40	3	1.54179	1.94578	0.199169	1	2258;5155;2264	PDGFB;FGFR4;FGF13
Negative Regulation of Sequestering of Calcium Ion (GO:0051283)		40	3	1.54179	1.94578	0.199169	1	2258;5334;6261	PLCL1;RYR1;FGF13
Ceramide Biosynthetic Process (GO:0046513)		40	3	1.54179	1.94578	0.199169	1	79152;8560;8705	DEGS1;B3GALT4;FA2H
Positive Regulation of Insulin Secretion (GO:0032024)		41	3	1.58034	1.89833	0.209207	1	3123;1080;57555	CFTR;HLA-DRB1;NLGN2
Positive Regulation of Stress Fiber Assembly (GO:0051496)		41	3	1.58034	1.89833	0.209207	1	389;22843;7984	RHOC;PPM1E;ARHGEF5
Potassium Ion Import Across Plasma Membrane (GO:1990573)		41	3	1.58034	1.89833	0.209207	1	57468;480;3773	KCNJ16;ATP1A4;SLC12A5
Regulation of Monoatomic Ion Transmembrane Transporter Activity (GO:0032412)		41	3	1.58034	1.89833	0.209207	1	23542;7225;57555	NLGN2;MAPK8IP2;TRPC6
Regulation of Receptor-Mediated Endocytosis (GO:0048259)		41	3	1.58034	1.89833	0.209207	1	636;341;5054	SERPINE1;BICD1;APOC1
Response to Hydrogen Peroxide (GO:0042542)		41	3	1.58034	1.89833	0.209207	1	7128;1545;55119	PRPF38B;TNFAIP3;CYP1B1
Lipid Catabolic Process (GO:0016042)		41	3	1.58034	1.89833	0.209207	1	79152;1545;3290	HSD11B1;CYP1B1;FA2H
Regulation of Chromosome Organization (GO:0033044)		42	3	1.61888	1.85313	0.219354	1	8607;83444;201161	CENPV;INO80B;RUVBL1
Regulation of Dendrite Development (GO:0050773)		42	3	1.61888	1.85313	0.219354	1	84879;23072;114788	MFSD2A;HECW1;CSMD3
Embryonic Organ Morphogenesis (GO:0048562)		42	3	1.61888	1.85313	0.219354	1	3235;3214;5156	PDGFRA;HOXB4;HOXD9
Release of Sequestered Calcium Ion Into Cytosol (GO:0051209)		43	3	1.65743	1.81003	0.229599	1	2258;5334;6261	PLCL1;RYR1;FGF13
Regulation of Osteoclast Differentiation (GO:0045670)		43	3	1.65743	1.81003	0.229599	1	7099;1435;4982	TLR4;TNFRSF11B;CSF1
Regulated Exocytosis (GO:0045055)		43	3	1.65743	1.81003	0.229599	1	6616;341359;6804	SNAP25;SYT10;STX1A
Synaptic Vesicle Exocytosis (GO:0016079)		43	3	1.65743	1.81003	0.229599	1	6616;341359;6804	SNAP25;SYT10;STX1A
mRNA Catabolic Process (GO:0006402)		44	3	1.69597	1.7689	0.239931	1	54512;51441;1797	DXO;YTHDF2;EXOSC4
Cellular Response to Chemokine (GO:1990869)		44	3	1.69597	1.7689	0.239931	1	4283;6367;6357	CCL13;CCL22;CXCL9
Regulation of Interleukin-10 Production (GO:0032653)		44	3	1.69597	1.7689	0.239931	1	7099;3123;940	TLR4;HLA-DRB1;CD28
Negative Regulation of Protein Serine/Threonine Kinase Activity (GO:0071901)		44	3	1.69597	1.7689	0.239931	1	1029;4040;5997	CDKN2A;RGS2;LRP6
Cellular Defense Response (GO:0006968)		44	3	1.69597	1.7689	0.239931	1	1234;4283;23601	CLEC5A;CXCL9;CCR5
Synaptic Vesicle Cycle (GO:0099504)		44	3	1.69597	1.7689	0.239931	1	6616;341359;6804	SNAP25;SYT10;STX1A
Pyruvate Metabolic Process (GO:0006090)		45	3	1.73452	1.72959	0.250339	1	80201;57717;5105	PCDHB16;PCK1;HKDC1
Regulation of Nitric Oxide Biosynthetic Process (GO:0045428)		45	3	1.73452	1.72959	0.250339	1	7099;2099;9722	TLR4;ESR1;NOS1AP
Positive Regulation of miRNA Transcription (GO:1902895)		45	3	1.73452	1.72959	0.250339	1	2258;3725;5155	PDGFB;FGF13;JUN
Regulation of Cell-Cell Adhesion (GO:0022407)		45	3	1.73452	1.72959	0.250339	1	1803;2045;11187	EPHA7;DPP4;PKP3
Regulation of Fibroblast Proliferation (GO:0048145)		45	3	1.73452	1.72959	0.250339	1	1869;5156;5155	PDGFB;PDGFRA;E2F1
Chemokine-Mediated Signaling Pathway (GO:0070098)		45	3	1.73452	1.72959	0.250339	1	4283;6367;6357	CCL13;CCL22;CXCL9
Collagen Fibril Organization (GO:0030199)		45	3	1.73452	1.72959	0.250339	1	1545;26585;1290	COL5A2;CYP1B1;GREM1
Triglyceride Metabolic Process (GO:0006641)		45	3	1.73452	1.72959	0.250339	1	57678;4023;341	LPL;GPAM;APOC1
Mononuclear Cell Differentiation (GO:1903131)		46	3	1.77306	1.69199	0.260811	1	3123;1435;8581	HLA-DRB1;LY6D;CSF1
Negative Regulation of ERK1 and ERK2 Cascade (GO:0070373)		46	3	1.77306	1.69199	0.260811	1	7099;10252;55885	LMO3;TLR4;SPRY1
Negative Regulation of Cold-Induced Thermogenesis (GO:0120163)		46	3	1.77306	1.69199	0.260811	1	468;7099;5334	TLR4;ATF4;PLCL1
Positive Regulation of Chemotaxis (GO:0050921)		46	3	1.77306	1.69199	0.260811	1	2258;5156;5155	PDGFB;PDGFRA;FGF13
Regulation of Secretion by Cell (GO:1903530)		46	3	1.77306	1.69199	0.260811	1	815;27345;203190	LGI3;CAMK2A;KCNMB4
Endoplasmic Reticulum Unfolded Protein Response (GO:0030968)		47	3	1.81161	1.65599	0.271339	1	468;7466;168620	ATF4;WFS1;BHLHA15
Positive Regulation of Blood Vessel Endothelial Cell Migration (GO:0043536)		47	3	1.81161	1.65599	0.271339	1	958;2258;5155	PDGFB;CD40;FGF13
Positive Regulation of Leukocyte Cell-Cell Adhesion (GO:1903039)		47	3	1.81161	1.65599	0.271339	1	3123;3037;10326	HLA-DRB1;HAS2;SIRPB1
Cardiac Conduction (GO:0061337)		47	3	1.81161	1.65599	0.271339	1	23630;1636;157378	ACE;TMEM65;KCNE5
Positive Regulation of Non-Canonical NF-kappaB Signal Transduction (GO:1901224)		47	3	1.81161	1.65599	0.271339	1	7099;7205;84675	TLR4;TRIM55;TRIP6
Arachidonate Metabolic Process (GO:0019369)		47	3	1.81161	1.65599	0.271339	1	79152;158584;1545	CYP1B1;FAAH2;FA2H
Positive Regulation of Actin Filament Bundle Assembly (GO:0032233)		48	3	1.85015	1.62149	0.281912	1	389;22843;7984	RHOC;PPM1E;ARHGEF5
Regulation of Wound Healing (GO:0061041)		48	3	1.85015	1.62149	0.281912	1	7128;2258;5054	TNFAIP3;SERPINE1;FGF13
Lipid Modification (GO:0030258)		48	3	1.85015	1.62149	0.281912	1	1607;130367;154141	DGKB;SGPP2;MBOAT1
Membrane Lipid Biosynthetic Process (GO:0046467)		48	3	1.85015	1.62149	0.281912	1	79152;8560;79993	ELOVL7;DEGS1;FA2H
Negative Regulation of Cell Projection Organization (GO:0031345)		49	3	1.8887	1.5884	0.292521	1	10371;146760;5802	PTPRS;SEMA3A;RTN4RL1
Positive Regulation of Fat Cell Differentiation (GO:0045600)		49	3	1.8887	1.5884	0.292521	1	6423;4023;55885	LMO3;LPL;SFRP2
Response to Glucose (GO:0009749)		49	3	1.8887	1.5884	0.292521	1	84327;4023;5105	ZBED3;PCK1;LPL
Positive Regulation of Lymphocyte Activation (GO:0051251)		49	3	1.8887	1.5884	0.292521	1	3123;30011;10326	SH3KBP1;HLA-DRB1;SIRPB1
Positive Regulation of Nervous System Development (GO:0051962)		49	3	1.8887	1.5884	0.292521	1	4321;57555;5176	SERPINF1;NLGN2;MMP12
Activation of Protein Kinase Activity (GO:0032147)		49	3	1.8887	1.5884	0.292521	1	3084;8795;5618	NRG1;TNFRSF10B;PRLR
Regulation of Synaptic Transmission, Glutamatergic (GO:0051966)		50	3	1.92724	1.55663	0.303155	1	23542;2897;57555	NLGN2;MAPK8IP2;GRIK1
Regulation of Receptor Signaling Pathway via JAK-STAT (GO:0046425)		50	3	1.92724	1.55663	0.303155	1	815;1545;8835	CAMK2A;SOCS2;CYP1B1
Positive Regulation of Small GTPase Mediated Signal Transduction (GO:0051057)		50	3	1.92724	1.55663	0.303155	1	50848;6091;55119	PRPF38B;ROBO1;F11R
Regulation of Hydrolase Activity (GO:0051336)		50	3	1.92724	1.55663	0.303155	1	815;55785;7984	FGD6;CAMK2A;ARHGEF5
Regulation of Metabolic Process (GO:0019222)		50	3	1.92724	1.55663	0.303155	1	83990;1545;5164	PDK2;BRIP1;CYP1B1
Positive Regulation of miRNA Metabolic Process (GO:2000630)		51	3	1.96579	1.52611	0.313806	1	2258;3725;5155	PDGFB;FGF13;JUN
Regulation of Signal Transduction by P53 Class Mediator (GO:1901796)		51	3	1.96579	1.52611	0.313806	1	1111;23645;1029	CDKN2A;PPP1R15A;CHEK1
Response to Peptide Hormone (GO:0043434)		52	3	2.00433	1.49676	0.324466	1	84327;5105;3667	ZBED3;IRS1;PCK1
Positive Regulation of Reactive Oxygen Species Metabolic Process (GO:2000379)		52	3	2.00433	1.49676	0.324466	1	7099;575;5155	TLR4;PDGFB;ADGRB1
Icosanoid Metabolic Process (GO:0006690)		53	3	2.04288	1.46852	0.335126	1	79152;158584;1545	CYP1B1;FAAH2;FA2H
Striated Muscle Contraction (GO:0006941)		53	3	2.04288	1.46852	0.335126	1	4621;23630;6261	RYR1;MYH3;KCNE5
Cartilage Development (GO:0051216)		53	3	2.04288	1.46852	0.335126	1	2258;861;864	RUNX1;RUNX3;FGF13
Plasma Membrane Bounded Cell Projection Morphogenesis (GO:0120039)		53	3	2.04288	1.46852	0.335126	1	8506;222950;57624	NYAP1;NYAP2;CNTNAP1
Epidermal Cell Differentiation (GO:0009913)		53	3	2.04288	1.46852	0.335126	1	51384;3868;6768	ST14;WNT16;KRT16
Telomere Organization (GO:0032200)		54	3	2.08142	1.44132	0.345777	1	25885;8607;83444	INO80B;POLR1A;RUVBL1
Positive Regulation of Telomere Maintenance (GO:0032206)		54	3	2.08142	1.44132	0.345777	1	225689;8607;83444	INO80B;MAPK15;RUVBL1
Phosphatidylcholine Metabolic Process (GO:0046470)		54	3	2.08142	1.44132	0.345777	1	84879;26279;154141	MFSD2A;PLA2G2D;MBOAT1
Protein Polymerization (GO:0051258)		54	3	2.08142	1.44132	0.345777	1	2258;1730;79778	MICALL2;DIAPH2;FGF13
Glycolipid Biosynthetic Process (GO:0009247)		54	3	2.08142	1.44132	0.345777	1	6487;8705;7368	ST3GAL3;B3GALT4;UGT8
Regulation of Protein Localization to Nucleus (GO:1900180)		55	3	2.11997	1.41512	0.356413	1	1029;6469;51208	CDKN2A;SHH;CLDN18
Muscle Organ Development (GO:0007517)		55	3	2.11997	1.41512	0.356413	1	4621;8912;1960	CACNA1H;EGR3;MYH3
Mitotic DNA Damage Checkpoint Signaling (GO:0044773)		55	3	2.11997	1.41512	0.356413	1	1111;51514;51065	DTL;RPS27L;CHEK1
Cellular Response to Unfolded Protein (GO:0034620)		56	3	2.15851	1.38985	0.367025	1	468;7466;168620	ATF4;WFS1;BHLHA15
Protein Homotetramerization (GO:0051289)		56	3	2.15851	1.38985	0.367025	1	57717;27165;6261	PCDHB16;GLS2;RYR1
Endocytic Recycling (GO:0032456)		56	3	2.15851	1.38985	0.367025	1	79778;30844;51762	MICALL2;RAB8B;EHD4
Autophagy of Mitochondrion (GO:0000422)		56	3	2.15851	1.38985	0.367025	1	1029;8878;84557	CDKN2A;SQSTM1;MAP1LC3A
Regulation of Bone Mineralization (GO:0030500)		57	3	2.19706	1.36546	0.377607	1	26585;84059;5552	SRGN;ADGRV1;GREM1
Response to Type II Interferon (GO:0034341)		57	3	2.19706	1.36546	0.377607	1	815;7099;10410	TLR4;IFITM3;CAMK2A
DNA-templated Transcription Initiation (GO:0006352)		57	3	2.19706	1.36546	0.377607	1	2960;57106;80227	NAT14;PAAF1;GTF2E1
mRNA Transport (GO:0051028)		59	3	2.27415	1.31918	0.398652	1	6428;4927;23089	SRSF3;PEG10;NUP88
Post-Transcriptional Regulation of Gene Expression (GO:0010608)		59	3	2.27415	1.31918	0.398652	1	2651;11187;5187	GCNT2;PER1;PKP3
Positive Regulation of Peptidyl-Tyrosine Phosphorylation (GO:0050731)		59	3	2.27415	1.31918	0.398652	1	3084;26585;146433	IL34;NRG1;GREM1
Negative Regulation of Canonical NF-kappaB Signal Transduction (GO:0043124)		61	3	2.35124	1.27592	0.419498	1	7128;2099;5187	ESR1;TNFAIP3;PER1
Regulation of Phagocytosis (GO:0050764)		61	3	2.35124	1.27592	0.419498	1	2268;6441;10326	SFTPD;FGR;SIRPB1
Glycerophospholipid Metabolic Process (GO:0006650)		61	3	2.35124	1.27592	0.419498	1	57678;5334;26279	PLA2G2D;PLCL1;GPAM
Negative Regulation of Binding (GO:0051100)		61	3	2.35124	1.27592	0.419498	1	1869;3725;6815	STYX;E2F1;JUN
Response to Molecule of Bacterial Origin (GO:0002237)		62	3	2.38978	1.25535	0.429831	1	7128;7099;10221	TLR4;TNFAIP3;TRIB1
Positive Regulation of T Cell Differentiation (GO:0045582)		62	3	2.38978	1.25535	0.429831	1	3123;6469;5105	SHH;PCK1;HLA-DRB1
Positive Regulation of Neurogenesis (GO:0050769)		62	3	2.38978	1.25535	0.429831	1	4321;6091;5176	SERPINF1;ROBO1;MMP12
Neurogenesis (GO:0022008)		63	3	2.42833	1.23542	0.440098	1	2258;51804;2250	FGF5;FGF13;SIX4
Negative Regulation of NF-kappaB Transcription Factor Activity (GO:0032088)		64	3	2.46687	1.21612	0.450294	1	7128;57413;1545	TNFAIP3;TMIGD3;CYP1B1
Negative Regulation of Cell Adhesion (GO:0007162)		64	3	2.46687	1.21612	0.450294	1	2651;1545;5054	SERPINE1;CYP1B1;GCNT2
Telomere Maintenance (GO:0000723)		65	3	2.50542	1.19741	0.460413	1	25885;8607;83444	INO80B;POLR1A;RUVBL1
Regulation of Translational Initiation (GO:0006446)		65	3	2.50542	1.19741	0.460413	1	23645;51441;1982	EIF4G2;PPP1R15A;YTHDF2
Regulation of Endocytosis (GO:0030100)		65	3	2.50542	1.19741	0.460413	1	2268;90678;51090	FGR;LRSAM1;PLLP
Fatty Acid Biosynthetic Process (GO:0006633)		67	3	2.58251	1.16166	0.480404	1	4023;8560;79993	ELOVL7;DEGS1;LPL
Extrinsic Apoptotic Signaling Pathway (GO:0097191)		67	3	2.58251	1.16166	0.480404	1	666;8795;282991	BLOC1S2;BOK;TNFRSF10B
Regulation of T Cell Activation (GO:0050863)		67	3	2.58251	1.16166	0.480404	1	3123;1511;10326	HLA-DRB1;CTSG;SIRPB1
Positive Regulation of Protein Polymerization (GO:0032273)		67	3	2.58251	1.16166	0.480404	1	80115;79998;89795	NAV3;BAIAP2L2;ANKRD53
Response to Ionizing Radiation (GO:0010212)		68	3	2.62105	1.14458	0.490269	1	10635;64782;55119	PRPF38B;AEN;RAD51AP1
Monocarboxylic Acid Transport (GO:0015718)		69	3	2.6596	1.12799	0.50004	1	84879;83758;2172	MFSD2A;FABP6;RBP5
DNA Replication (GO:0006260)		69	3	2.6596	1.12799	0.50004	1	1111;25885;57418	WDR18;POLR1A;CHEK1
Negative Regulation of Immune Response (GO:0050777)		69	3	2.6596	1.12799	0.50004	1	7128;2268;3123	TNFAIP3;HLA-DRB1;FGR
Negative Regulation of Apoptotic Signaling Pathway (GO:2001234)		71	3	2.73668	1.09622	0.519293	1	23542;7857;51384	SCG2;MAPK8IP2;WNT16
Protein Deubiquitination (GO:0016579)		71	3	2.73668	1.09622	0.519293	1	7128;57559;139562	TNFAIP3;STAMBPL1;OTUD6A
Defense Response to Gram-positive Bacterium (GO:0050830)		71	3	2.73668	1.09622	0.519293	1	2268;4852;1511	FGR;NPY;CTSG
Embryonic Organ Development (GO:0048568)		71	3	2.73668	1.09622	0.519293	1	468;84879;5155	MFSD2A;ATF4;PDGFB
Regulation of Double-Strand Break Repair via Homologous Recombination (GO:0010569)		71	3	2.73668	1.09622	0.519293	1	1111;10635;8607	RAD51AP1;RUVBL1;CHEK1
Negative Regulation of Cellular Response to Growth Factor Stimulus (GO:0090288)		71	3	2.73668	1.09622	0.519293	1	2258;26585;10252	SPRY1;FGF13;GREM1
Regulation of Non-Canonical NF-kappaB Signal Transduction (GO:1901222)		72	3	2.77523	1.08099	0.528768	1	7099;7205;84675	TLR4;TRIM55;TRIP6
Positive Regulation of Cell-Substrate Adhesion (GO:0010811)		72	3	2.77523	1.08099	0.528768	1	1399;5155;1435	PDGFB;CRKL;CSF1
Sensory Organ Development (GO:0007423)		72	3	2.77523	1.08099	0.528768	1	55636;51804;168620	CHD7;SIX4;BHLHA15
Regulation of BMP Signaling Pathway (GO:0030510)		73	3	2.81377	1.06618	0.538138	1	6424;1003;26585	SFRP4;GREM1;CDH5
RNA Catabolic Process (GO:0006401)		74	3	2.85232	1.05178	0.547401	1	54512;51441;1797	DXO;YTHDF2;EXOSC4
Myeloid Leukocyte Differentiation (GO:0002573)		74	3	2.85232	1.05178	0.547401	1	3123;861;1435	RUNX1;HLA-DRB1;CSF1
Aerobic Respiration (GO:0009060)		75	3	2.89086	1.03775	0.556554	1	4967;6392;7384	SDHD;UQCRC1;OGDH
Positive Regulation of Protein Modification by Small Protein Conjugation or Removal (GO:1903322)		75	3	2.89086	1.03775	0.556554	1	8452;7466;1029	CDKN2A;CUL3;WFS1
Regulation of Catabolic Process (GO:0009894)		75	3	2.89086	1.03775	0.556554	1	666;225689;27074	BOK;LAMP3;MAPK15
Positive Regulation of Secretion by Cell (GO:1903532)		75	3	2.89086	1.03775	0.556554	1	1080;286097;6804	CFTR;MICU3;STX1A
Transforming Growth Factor Beta Receptor Signaling Pathway (GO:0007179)		75	3	2.89086	1.03775	0.556554	1	3725;1003;2651	GCNT2;CDH5;JUN
Regulation of Interleukin-1 Beta Production (GO:0032651)		77	3	2.96795	1.0108	0.574524	1	7128;7099;4023	TLR4;TNFAIP3;LPL
Regulation of Organelle Assembly (GO:1902115)		80	3	3.08359	0.972892	0.600611	1	225689;51057;7813	WDPCP;EVI5;MAPK15
Long-Chain Fatty Acid Metabolic Process (GO:0001676)		82	3	3.16068	0.949163	0.617408	1	79152;158584;1545	CYP1B1;FAAH2;FA2H
Vascular Transport (GO:0010232)		83	3	3.19922	0.937728	0.625626	1	84879;6543;480	MFSD2A;SLC8A2;ATP1A4
Regulation of Cell Division (GO:0051302)		83	3	3.19922	0.937728	0.625626	1	6469;6423;4300	SHH;MLLT3;SFRP2
Positive Regulation of Endothelial Cell Migration (GO:0010595)		84	3	3.23777	0.926564	0.633721	1	958;2258;5155	PDGFB;CD40;FGF13
Transport Across Blood-Brain Barrier (GO:0150104)		85	3	3.27631	0.915663	0.641695	1	84879;6543;480	MFSD2A;SLC8A2;ATP1A4
Regulation of Double-Strand Break Repair (GO:2000779)		85	3	3.27631	0.915663	0.641695	1	1111;10635;8607	RAD51AP1;RUVBL1;CHEK1
ERAD Pathway (GO:0036503)		86	3	3.31486	0.905016	0.649545	1	7466;51528;80020	FOXRED2;JKAMP;WFS1
Regulation of Mitotic Cell Cycle Phase Transition (GO:1901990)		86	3	3.31486	0.905016	0.649545	1	8452;1869;1029	CDKN2A;CUL3;E2F1
Positive Regulation of Protein Kinase Activity (GO:0045860)		86	3	3.31486	0.905016	0.649545	1	8826;6543;146433	SLC8A2;IL34;IQGAP1
Positive Regulation of DNA Repair (GO:0045739)		88	3	3.39195	0.884448	0.664877	1	8607;83444;2070	EYA4;INO80B;RUVBL1
Positive Regulation of Cellular Component Biogenesis (GO:0044089)		89	3	3.43049	0.87451	0.672358	1	3084;389;1003	RHOC;NRG1;CDH5
Protein K48-linked Ubiquitination (GO:0070936)		89	3	3.43049	0.87451	0.672358	1	7128;8452;84675	TRIM55;TNFAIP3;CUL3
Regulation of Protein Localization to Plasma Membrane (GO:1903076)		90	3	3.46904	0.864793	0.679716	1	5295;815;8878	PIK3R1;SQSTM1;CAMK2A
Positive Regulation of Supramolecular Fiber Organization (GO:1902905)		93	3	3.58467	0.836897	0.701052	1	80115;79998;89795	NAV3;BAIAP2L2;ANKRD53
Regulation of Protein Secretion (GO:0050708)		94	3	3.62322	0.827994	0.707919	1	114897;6616;6804	SNAP25;C1QTNF1;STX1A
Positive Regulation of Autophagy (GO:0010508)		96	3	3.70031	0.810744	0.72129	1	2308;8878;378884	NHLRC1;SQSTM1;FOXO1
Phospholipase C-activating G Protein-Coupled Receptor Signaling Pathway (GO:0007200)		96	3	3.70031	0.810744	0.72129	1	5745;2099;2596	ESR1;PTH1R;GAP43
Positive Regulation of Translation (GO:0045727)		101	3	3.89303	0.770608	0.752628	1	51065;51441;940	RPS27L;YTHDF2;CD28
Regulation of Interleukin-6 Production (GO:0032675)		105	3	4.04721	0.741251	0.77561	1	7128;7099;4023	TLR4;TNFAIP3;LPL
rRNA Processing (GO:0006364)		106	3	4.08575	0.734258	0.781074	1	54512;57418;51018	WDR18;RRP15;EXOSC4
Transcription Initiation at RNA Polymerase II Promoter (GO:0006367)		106	3	4.08575	0.734258	0.781074	1	2960;80227;2099	ESR1;PAAF1;GTF2E1
Positive Regulation of T Cell Activation (GO:0050870)		107	3	4.1243	0.727396	0.786429	1	3123;940;10326	HLA-DRB1;SIRPB1;CD28
Glycerophospholipid Biosynthetic Process (GO:0046474)		108	3	4.16284	0.720661	0.791674	1	57678;1607;84879	MFSD2A;DGKB;GPAM
Antigen Receptor-Mediated Signaling Pathway (GO:0050851)		109	3	4.20139	0.714049	0.796813	1	973;3123;940	HLA-DRB1;CD79A;CD28
Regulation of Primary Metabolic Process (GO:0080090)		110	3	4.23993	0.707558	0.801844	1	2264;286676;113146	AHNAK2;ILDR1;FGFR4
Positive Regulation of Inflammatory Response (GO:0050729)		111	3	4.27848	0.701184	0.806772	1	7099;4023;5054	TLR4;SERPINE1;LPL
Positive Regulation of Cell Projection Organization (GO:0031346)		111	3	4.27848	0.701184	0.806772	1	6091;4058;221914	GPC2;LTK;ROBO1
Negative Regulation of Defense Response (GO:0031348)		112	3	4.31702	0.694923	0.811595	1	7128;1003;10848	TNFAIP3;CDH5;PPP1R13L
Response to Cytokine (GO:0034097)		120	3	4.62538	0.648595	0.846628	1	4321;10410;27074	IFITM3;LAMP3;MMP12
Epithelial Cell Differentiation (GO:0030855)		120	3	4.62538	0.648595	0.846628	1	5105;3868;3299	HSF4;PCK1;KRT16
Mitochondrion Organization (GO:0007005)		122	3	4.70247	0.637962	0.854452	1	4832;54332;219293	NME3;GDAP1;ATAD3C
Regulation of Tumor Necrosis Factor Production (GO:0032680)		124	3	4.77956	0.627673	0.861925	1	7128;7099;4023	TLR4;TNFAIP3;LPL
Regulation of DNA Repair (GO:0006282)		125	3	4.81811	0.622651	0.865534	1	8607;83444;2070	EYA4;INO80B;RUVBL1
Receptor-Mediated Endocytosis (GO:0006898)		135	3	5.20356	0.576529	0.897287	1	1803;6441;53353	SFTPD;LRP1B;DPP4
Positive Regulation of Metabolic Process (GO:0009893)		146	3	5.62755	0.533092	0.924292	1	5618;5155;57540	PDGFB;DISP3;PRLR
Ribosome Biogenesis (GO:0042254)		152	3	5.85882	0.512049	0.936121	1	54512;57418;51491	WDR18;NOP16;EXOSC4
mRNA Splicing, via Spliceosome (GO:0000398)		201	3	7.74752	0.387221	0.985202	1	6428;143884;79753	SRSF3;SNIP1;CWF19L2
mRNA Processing (GO:0006397)		210	3	8.09442	0.370626	0.988823	1	54888;143884;79753	NSUN2;SNIP1;CWF19L2
Maintenance of Protein Localization in Endoplasmic Reticulum (GO:0035437)		10	2	0.385449	5.18876	0.0543592	1	3638;64714	INSIG1;PDIA2
Negative Regulation of Bone Mineralization (GO:0030502)		10	2	0.385449	5.18876	0.0543592	1	26585;5552	SRGN;GREM1
Cellular Response to Nutrient (GO:0031670)		10	2	0.385449	5.18876	0.0543592	1	4023;5164	PDK2;LPL
Response to Sterol (GO:0036314)		10	2	0.385449	5.18876	0.0543592	1	3638;1234	INSIG1;CCR5
Glucan Metabolic Process (GO:0044042)		10	2	0.385449	5.18876	0.0543592	1	51422;378884	NHLRC1;PRKAG2
Positive Regulation of Gluconeogenesis (GO:0045722)		10	2	0.385449	5.18876	0.0543592	1	51422;2308	FOXO1;PRKAG2
Embryonic Appendage Morphogenesis (GO:0035113)		10	2	0.385449	5.18876	0.0543592	1	4621;6469	SHH;MYH3
Epithelial Cell-Cell Adhesion (GO:0090136)		10	2	0.385449	5.18876	0.0543592	1	7414;11187	VCL;PKP3
Cellular Response to Growth Hormone Stimulus (GO:0071378)		10	2	0.385449	5.18876	0.0543592	1	5295;8835	PIK3R1;SOCS2
Nuclear mRNA Surveillance (GO:0071028)		10	2	0.385449	5.18876	0.0543592	1	54512;1797	DXO;EXOSC4
Protein K11-linked Deubiquitination (GO:0035871)		10	2	0.385449	5.18876	0.0543592	1	7128;139562	TNFAIP3;OTUD6A
Negative Regulation of Smooth Muscle Cell Differentiation (GO:0051151)		10	2	0.385449	5.18876	0.0543592	1	6469;5155	PDGFB;SHH
Positive Regulation of Smooth Muscle Cell Apoptotic Process (GO:0034393)		10	2	0.385449	5.18876	0.0543592	1	2308;1029	CDKN2A;FOXO1
T-helper 1 Type Immune Response (GO:0042088)		10	2	0.385449	5.18876	0.0543592	1	7099;3123	TLR4;HLA-DRB1
Myelin Assembly (GO:0032288)		10	2	0.385449	5.18876	0.0543592	1	8506;51090	PLLP;CNTNAP1
Regulation of DNA-templated Transcription Initiation (GO:2000142)		10	2	0.385449	5.18876	0.0543592	1	2308;3725	FOXO1;JUN
Very-Low-Density Lipoprotein Particle Assembly (GO:0034379)		10	2	0.385449	5.18876	0.0543592	1	341;84879	MFSD2A;APOC1
Induction of Positive Chemotaxis (GO:0050930)		10	2	0.385449	5.18876	0.0543592	1	7857;5228	PGF;SCG2
Negative Regulation of Cholesterol Transport (GO:0032375)		10	2	0.385449	5.18876	0.0543592	1	6469;341	SHH;APOC1
Mitotic Spindle Elongation (GO:0000022)		10	2	0.385449	5.18876	0.0543592	1	29127;9493	RACGAP1;KIF23
Mitotic Spindle Midzone Assembly (GO:0051256)		10	2	0.385449	5.18876	0.0543592	1	29127;9493	RACGAP1;KIF23
Sarcoplasmic Reticulum Calcium Ion Transport (GO:0070296)		10	2	0.385449	5.18876	0.0543592	1	1234;6261	RYR1;CCR5
Metanephric Mesenchyme Development (GO:0072075)		10	2	0.385449	5.18876	0.0543592	1	6469;51804	SHH;SIX4
Renal Filtration (GO:0097205)		10	2	0.385449	5.18876	0.0543592	1	57156;63929	XPNPEP3;TMEM63C
Phosphate Ion Homeostasis (GO:0055062)		11	2	0.423993	4.71705	0.0647829	1	6424;2264	SFRP4;FGFR4
Positive Regulation of Macrophage Differentiation (GO:0045651)		11	2	0.423993	4.71705	0.0647829	1	1435;146433	IL34;CSF1
Insulin-Like Growth Factor Receptor Signaling Pathway (GO:0048009)		11	2	0.423993	4.71705	0.0647829	1	5295;3667	IRS1;PIK3R1
Positive Regulation of Endoplasmic Reticulum Unfolded Protein Response (GO:1900103)		11	2	0.423993	4.71705	0.0647829	1	5295;666	BOK;PIK3R1
Negative Regulation of Bone Remodeling (GO:0046851)		11	2	0.423993	4.71705	0.0647829	1	7128;26585	TNFAIP3;GREM1
Cardiocyte Differentiation (GO:0035051)		11	2	0.423993	4.71705	0.0647829	1	3084;26585	NRG1;GREM1
Central Nervous System Myelination (GO:0022010)		11	2	0.423993	4.71705	0.0647829	1	8506;745	MYRF;CNTNAP1
Potassium Ion Export Across Plasma Membrane (GO:0097623)		11	2	0.423993	4.71705	0.0647829	1	23630;343450	KCNT2;KCNE5
Positive Regulation of Calcium Ion-Dependent Exocytosis (GO:0045956)		11	2	0.423993	4.71705	0.0647829	1	341359;6804	SYT10;STX1A
Regulation of PERK-mediated Unfolded Protein Response (GO:1903897)		12	2	0.462538	4.32397	0.0758084	1	23645;666	BOK;PPP1R15A
Hyaluronan Metabolic Process (GO:0030212)		12	2	0.462538	4.32397	0.0758084	1	2258;3037	HAS2;FGF13
Relaxation of Cardiac Muscle (GO:0055119)		12	2	0.462538	4.32397	0.0758084	1	480;5997	RGS2;ATP1A4
Neuronal Action Potential (GO:0019228)		12	2	0.462538	4.32397	0.0758084	1	3776;27345	KCNMB4;KCNK2
Negative Regulation of Chemotaxis (GO:0050922)		12	2	0.462538	4.32397	0.0758084	1	6091;285	ANGPT2;ROBO1
Intestinal Absorption (GO:0050892)		12	2	0.462538	4.32397	0.0758084	1	6518;50848	F11R;SLC2A5
Midbrain Dopaminergic Neuron Differentiation (GO:1904948)		12	2	0.462538	4.32397	0.0758084	1	4040;4009	LRP6;LMX1A
Regulation of Fatty Acid Beta-Oxidation (GO:0031998)		12	2	0.462538	4.32397	0.0758084	1	84879;3667	IRS1;MFSD2A
Presynapse Organization (GO:0099172)		12	2	0.462538	4.32397	0.0758084	1	57555;57502	NLGN4X;NLGN2
Nitric Oxide Biosynthetic Process (GO:0006809)		12	2	0.462538	4.32397	0.0758084	1	1545;9722	NOS1AP;CYP1B1
Negative Regulation of Microtubule Polymerization (GO:0031115)		12	2	0.462538	4.32397	0.0758084	1	1003;3925	STMN1;CDH5
Glycerolipid Metabolic Process (GO:0046486)		12	2	0.462538	4.32397	0.0758084	1	57678;1607	DGKB;GPAM
Regulation of Chemokine (C-X-C Motif) Ligand 2 Production (GO:2000341)		13	2	0.501083	3.99135	0.0873739	1	7099;4023	TLR4;LPL
Intrinsic Apoptotic Signaling Pathway in Response to Oxidative Stress (GO:0008631)		13	2	0.501083	3.99135	0.0873739	1	8428;1545	STK24;CYP1B1
Relaxation of Muscle (GO:0090075)		13	2	0.501083	3.99135	0.0873739	1	480;5997	RGS2;ATP1A4
+ Reg of Insulin Secretion Inv in Cellular Resp to Glucose Stimulus (GO:0035774)		13	2	0.501083	3.99135	0.0873739	1	3123;1080	CFTR;HLA-DRB1
Atrial Septum Development (GO:0003283)		13	2	0.501083	3.99135	0.0873739	1	2702;27031	NPHP3;GJA5
Cranial Nerve Development (GO:0021545)		13	2	0.501083	3.99135	0.0873739	1	55636;497189	TIFAB;CHD7
Regulation of Catecholamine Secretion (GO:0050433)		13	2	0.501083	3.99135	0.0873739	1	1137;6804	CHRNA4;STX1A
Negative Regulation of Toll-Like Receptor 4 Signaling Pathway (GO:0034144)		13	2	0.501083	3.99135	0.0873739	1	7128;8878	TNFAIP3;SQSTM1
Negative Regulation of Cardiac Muscle Hypertrophy (GO:0010614)		13	2	0.501083	3.99135	0.0873739	1	2308;5997	RGS2;FOXO1
Regulation of Branching Involved in Ureteric Bud Morphogenesis (GO:0090189)		13	2	0.501083	3.99135	0.0873739	1	51804;4070	TACSTD2;SIX4
Positive Regulation of Cellular Response to Insulin Stimulus (GO:1900078)		13	2	0.501083	3.99135	0.0873739	1	3667;79746	IRS1;ECHDC3
Positive Regulation of Coagulation (GO:0050820)		13	2	0.501083	3.99135	0.0873739	1	285;5054	ANGPT2;SERPINE1
Negative Regulation of Secretion (GO:0051048)		13	2	0.501083	3.99135	0.0873739	1	3084;497189	TIFAB;NRG1
Regulation of Protein Autophosphorylation (GO:0031952)		13	2	0.501083	3.99135	0.0873739	1	2045;5155	PDGFB;EPHA7
Cochlea Morphogenesis (GO:0090103)		13	2	0.501083	3.99135	0.0873739	1	497189;3198	TIFAB;HOXA1
Cellular Response to Acidic pH (GO:0071468)		13	2	0.501083	3.99135	0.0873739	1	342372;6337	SCNN1A;PKD1L3
Negative Regulation of Fibroblast Growth Factor Receptor Signaling Pathway (GO:0040037)		13	2	0.501083	3.99135	0.0873739	1	2258;10252	SPRY1;FGF13
2-Oxoglutarate Metabolic Process (GO:0006103)		14	2	0.539628	3.70626	0.0994217	1	728294;4967	OGDH;D2HGDH
Regulation of Extracellular Matrix Disassembly (GO:0010715)		14	2	0.539628	3.70626	0.0994217	1	1803;2264	FGFR4;DPP4
Cell Communication by Electrical Coupling Involved in Cardiac Conduction (GO:0086064)		14	2	0.539628	3.70626	0.0994217	1	2702;480	GJA5;ATP1A4
One-Carbon Compound Transport (GO:0019755)		14	2	0.539628	3.70626	0.0994217	1	6563;6005	SLC14A1;RHAG
Negative Regulation of Smooth Muscle Cell Migration (GO:0014912)		14	2	0.539628	3.70626	0.0994217	1	10221;5054	SERPINE1;TRIB1
Positive Regulation of Cardiac Muscle Cell Proliferation (GO:0060045)		14	2	0.539628	3.70626	0.0994217	1	3084;2258	NRG1;FGF13
Regulation of Coagulation (GO:0050818)		14	2	0.539628	3.70626	0.0994217	1	285;5054	ANGPT2;SERPINE1
Bone Morphogenesis (GO:0060349)		14	2	0.539628	3.70626	0.0994217	1	6424;56603	SFRP4;CYP26B1
Positive Regulation of Macrophage Chemotaxis (GO:0010759)		14	2	0.539628	3.70626	0.0994217	1	1435;146433	IL34;CSF1
Positive Regulation of Telomere Maintenance in Response to DNA Damage (GO:1904507)		14	2	0.539628	3.70626	0.0994217	1	8607;83444	INO80B;RUVBL1
Central Nervous System Neuron Development (GO:0021954)		14	2	0.539628	3.70626	0.0994217	1	4852;26468	LHX6;NPY
Embryonic Cranial Skeleton Morphogenesis (GO:0048701)		14	2	0.539628	3.70626	0.0994217	1	3198;5156	PDGFRA;HOXA1
Cellular Response to Estrogen Stimulus (GO:0071391)		14	2	0.539628	3.70626	0.0994217	1	2099;51208	ESR1;CLDN18
Neuron Cell-Cell Adhesion (GO:0007158)		14	2	0.539628	3.70626	0.0994217	1	57555;57502	NLGN4X;NLGN2
Negative Regulation of Lyase Activity (GO:0051350)		14	2	0.539628	3.70626	0.0994217	1	29085;2587	PHPT1;GALR1
Regulation of AMPA Receptor Activity (GO:2000311)		14	2	0.539628	3.70626	0.0994217	1	23542;57555	NLGN2;MAPK8IP2
Proteinogenic Amino Acid Catabolic Process (GO:0170040)		14	2	0.539628	3.70626	0.0994217	1	3034;2731	GLDC;HAL
Stem Cell Development (GO:0048864)		15	2	0.578173	3.45917	0.111898	1	3084;6469	SHH;NRG1
Centromere Complex Assembly (GO:0034508)		15	2	0.578173	3.45917	0.111898	1	2491;201161	CENPV;CENPI
Regulation of Nitric-Oxide Synthase Activity (GO:0050999)		15	2	0.578173	3.45917	0.111898	1	2099;9722	ESR1;NOS1AP
Regulation of Telomere Maintenance in Response to DNA Damage (GO:1904505)		15	2	0.578173	3.45917	0.111898	1	8607;83444	INO80B;RUVBL1
Mitochondrion Transport Along Microtubule (GO:0047497)		15	2	0.578173	3.45917	0.111898	1	4747;23095	NEFL;KIF1B
Amyloid-Beta Metabolic Process (GO:0050435)		15	2	0.578173	3.45917	0.111898	1	1636;4321	ACE;MMP12
Genitalia Development (GO:0048806)		15	2	0.578173	3.45917	0.111898	1	6469;497189	TIFAB;SHH
Positive Regulation of Regulated Secretory Pathway (GO:1903307)		15	2	0.578173	3.45917	0.111898	1	341359;6804	SYT10;STX1A
Branched-Chain Amino Acid Metabolic Process (GO:0009081)		16	2	0.616718	3.24297	0.124751	1	587;5095	BCAT2;PCCA
Positive Regulation of Lipid Storage (GO:0010884)		16	2	0.616718	3.24297	0.124751	1	4023;123	PLIN2;LPL
Negative Regulation of Inflammatory Response to Antigenic Stimulus (GO:0002862)		16	2	0.616718	3.24297	0.124751	1	2268;3123	HLA-DRB1;FGR
Glucose 6-Phosphate Metabolic Process (GO:0051156)		16	2	0.616718	3.24297	0.124751	1	80201;26227	PHGDH;HKDC1
Regulation of Macrophage Differentiation (GO:0045649)		16	2	0.616718	3.24297	0.124751	1	1435;146433	IL34;CSF1
Release of Cytochrome C From Mitochondria (GO:0001836)		16	2	0.616718	3.24297	0.124751	1	666;79017	BOK;GGCT
Regulation of Steroid Biosynthetic Process (GO:0050810)		16	2	0.616718	3.24297	0.124751	1	2264;283316	CD163L1;FGFR4
Regulation of Osteoblast Proliferation (GO:0033688)		16	2	0.616718	3.24297	0.124751	1	26585;4330	MN1;GREM1
Mitochondrial Fusion (GO:0008053)		16	2	0.616718	3.24297	0.124751	1	4832;54332	NME3;GDAP1
Regulation of DNA Strand Elongation (GO:0060382)		16	2	0.616718	3.24297	0.124751	1	8607;83444	INO80B;RUVBL1
Maturation of 5.8S rRNA (GO:0000460)		16	2	0.616718	3.24297	0.124751	1	54512;51018	RRP15;EXOSC4
Negative Regulation of Insulin Secretion (GO:0046676)		16	2	0.616718	3.24297	0.124751	1	2308;3667	IRS1;FOXO1
Regulation of Non-Canonical Wnt Signaling Pathway (GO:2000050)		16	2	0.616718	3.24297	0.124751	1	6424;27031	NPHP3;SFRP4
Regulation of Fibrinolysis (GO:0051917)		16	2	0.616718	3.24297	0.124751	1	5054;3818	SERPINE1;KLKB1
Positive Regulation of Positive Chemotaxis (GO:0050927)		16	2	0.616718	3.24297	0.124751	1	7857;5228	PGF;SCG2
Columnar/Cuboidal Epithelial Cell Differentiation (GO:0002065)		16	2	0.616718	3.24297	0.124751	1	4852;140628	NPY;GATA5
Anterograde Synaptic Vesicle Transport (GO:0048490)		16	2	0.616718	3.24297	0.124751	1	282991;23095	BLOC1S2;KIF1B
Synaptic Vesicle Transport Along Microtubule (GO:0099517)		16	2	0.616718	3.24297	0.124751	1	282991;23095	BLOC1S2;KIF1B
Retrograde Axonal Transport (GO:0008090)		16	2	0.616718	3.24297	0.124751	1	4747;23095	NEFL;KIF1B
Oligodendrocyte Development (GO:0014003)		16	2	0.616718	3.24297	0.124751	1	8506;745	MYRF;CNTNAP1
Presynapse Assembly (GO:0099054)		16	2	0.616718	3.24297	0.124751	1	57555;57502	NLGN4X;NLGN2
Epithelial Cilium Movement Involved in Extracellular Fluid Movement (GO:0003351)		16	2	0.616718	3.24297	0.124751	1	27031;26256	CABYR;NPHP3
Aromatic Amino Acid Family Catabolic Process (GO:0009074)		17	2	0.655263	3.05221	0.137934	1	3034;2184	FAH;HAL
Positive Regulation of Epidermal Cell Differentiation (GO:0045606)		17	2	0.655263	3.05221	0.137934	1	6424;2118	SFRP4;ETV4
Intracellular Sodium Ion Homeostasis (GO:0006883)		17	2	0.655263	3.05221	0.137934	1	480;6337	SCNN1A;ATP1A4
DNA Modification (GO:0006304)		17	2	0.655263	3.05221	0.137934	1	54512;7374	UNG;EXOSC4
B Cell Proliferation (GO:0042100)		17	2	0.655263	3.05221	0.137934	1	958;973	CD40;CD79A
Immune Response-Regulating Cell Surface Receptor Signaling Pathway (GO:0002768)		17	2	0.655263	3.05221	0.137934	1	958;2268	CD40;FGR
Platelet-Derived Growth Factor Receptor Signaling Pathway (GO:0048008)		17	2	0.655263	3.05221	0.137934	1	5156;5155	PDGFB;PDGFRA
Positive Regulation of Cardiac Muscle Tissue Growth (GO:0055023)		17	2	0.655263	3.05221	0.137934	1	3084;2258	NRG1;FGF13
Regulation of Neurotransmitter Transport (GO:0051588)		17	2	0.655263	3.05221	0.137934	1	815;27345	CAMK2A;KCNMB4
Striated Muscle Cell Differentiation (GO:0051146)		17	2	0.655263	3.05221	0.137934	1	3084;26585	NRG1;GREM1
Positive Regulation of Leukocyte Proliferation (GO:0070665)		17	2	0.655263	3.05221	0.137934	1	1435;146433	IL34;CSF1
Positive Regulation of Potassium Ion Transport (GO:0043268)		17	2	0.655263	3.05221	0.137934	1	23630;9722	NOS1AP;KCNE5
Positive Regulation of Alpha-Beta T Cell Activation (GO:0046635)		17	2	0.655263	3.05221	0.137934	1	3123;6469	SHH;HLA-DRB1
Negative Regulation of Peptide Hormone Secretion (GO:0090278)		17	2	0.655263	3.05221	0.137934	1	2308;3667	IRS1;FOXO1
Membrane Lipid Catabolic Process (GO:0046466)		17	2	0.655263	3.05221	0.137934	1	1545;130367	CYP1B1;SGPP2
Embryonic Digit Morphogenesis (GO:0042733)		17	2	0.655263	3.05221	0.137934	1	6469;51057	SHH;WDPCP
Cellular Response to Sterol (GO:0036315)		17	2	0.655263	3.05221	0.137934	1	3638;4040	LRP6;INSIG1
G Protein-Coupled Acetylcholine Receptor Signaling Pathway (GO:0007213)		17	2	0.655263	3.05221	0.137934	1	6001;85397	RGS10;RGS8
Negative Regulation of Endoplasmic Reticulum Unfolded Protein Response (GO:1900102)		18	2	0.693807	2.88264	0.151402	1	23645;7466	PPP1R15A;WFS1
Positive Regulation of Protein Processing (GO:0010954)		18	2	0.693807	2.88264	0.151402	1	3818;7123	CLEC3B;KLKB1
Nucleoside Phosphate Biosynthetic Process (GO:1901293)		18	2	0.693807	2.88264	0.151402	1	4832;57717	PCDHB16;NME3
Positive Regulation of Potassium Ion Transmembrane Transport (GO:1901381)		18	2	0.693807	2.88264	0.151402	1	23630;9722	NOS1AP;KCNE5
Transepithelial Transport (GO:0070633)		18	2	0.693807	2.88264	0.151402	1	51208;7439	BEST1;CLDN18
Neural Crest Cell Differentiation (GO:0014033)		18	2	0.693807	2.88264	0.151402	1	3084;4040	NRG1;LRP6
Growth Hormone Receptor Signaling Pathway (GO:0060396)		18	2	0.693807	2.88264	0.151402	1	5295;8835	PIK3R1;SOCS2
Response to Axon Injury (GO:0048678)		18	2	0.693807	2.88264	0.151402	1	146760;2596	GAP43;RTN4RL1
Response to Interferon-Alpha (GO:0035455)		18	2	0.693807	2.88264	0.151402	1	10410;27074	IFITM3;LAMP3
Branching Involved in Ureteric Bud Morphogenesis (GO:0001658)		18	2	0.693807	2.88264	0.151402	1	2258;6469	SHH;FGF13
Ureteric Bud Morphogenesis (GO:0060675)		18	2	0.693807	2.88264	0.151402	1	2258;6469	SHH;FGF13
Regulation of Acute Inflammatory Response (GO:0002673)		18	2	0.693807	2.88264	0.151402	1	26279;3818	PLA2G2D;KLKB1
Positive Regulation of Homotypic Cell-Cell Adhesion (GO:0034112)		18	2	0.693807	2.88264	0.151402	1	50848;1511	F11R;CTSG
Response to Acidic pH (GO:0010447)		18	2	0.693807	2.88264	0.151402	1	342372;6337	SCNN1A;PKD1L3
Triglyceride Biosynthetic Process (GO:0019432)		18	2	0.693807	2.88264	0.151402	1	57678;5105	PCK1;GPAM
Calcium-Independent Cell-Cell Adhesion via Plasma Membrane Cell-Adhesion Molecules (GO:0016338)		18	2	0.693807	2.88264	0.151402	1	51208;137075	CLDN23;CLDN18
Negative Regulation of Transferase Activity (GO:0051348)		19	2	0.732352	2.73093	0.165115	1	1029;29085	CDKN2A;PHPT1
Positive Regulation of Stem Cell Differentiation (GO:2000738)		19	2	0.732352	2.73093	0.165115	1	3214;4070	HOXB4;TACSTD2
Protein Localization to Microtubule Organizing Center (GO:1905508)		19	2	0.732352	2.73093	0.165115	1	8428;9851	KIAA0753;STK24
Energy Reserve Metabolic Process (GO:0006112)		19	2	0.732352	2.73093	0.165115	1	51422;378884	NHLRC1;PRKAG2
Cardiac Ventricle Development (GO:0003231)		19	2	0.732352	2.73093	0.165115	1	2702;157378	TMEM65;GJA5
Pulmonary Valve Morphogenesis (GO:0003184)		19	2	0.732352	2.73093	0.165115	1	2702;6091	ROBO1;GJA5
Sensory Perception of Pain (GO:0019233)		19	2	0.732352	2.73093	0.165115	1	1137;4321	CHRNA4;MMP12
Ameboidal-Type Cell Migration (GO:0001667)		19	2	0.732352	2.73093	0.165115	1	8826;201161	CENPV;IQGAP1
Positive Regulation of Cell Cycle Phase Transition (GO:1901989)		19	2	0.732352	2.73093	0.165115	1	8452;11187	CUL3;PKP3
Regulation of Behavior (GO:0050795)		19	2	0.732352	2.73093	0.165115	1	3198;347148	QRFP;HOXA1
Positive Regulation of Ion Transmembrane Transporter Activity (GO:0032414)		19	2	0.732352	2.73093	0.165115	1	1080;7225	CFTR;TRPC6
Positive Regulation of Macrophage Derived Foam Cell Differentiation (GO:0010744)		19	2	0.732352	2.73093	0.165115	1	4023;1435	LPL;CSF1
Negative Regulation of Lipid Catabolic Process (GO:0050995)		19	2	0.732352	2.73093	0.165115	1	341;84879	MFSD2A;APOC1
Positive Regulation of Cation Transmembrane Transport (GO:1904064)		19	2	0.732352	2.73093	0.165115	1	23630;9722	NOS1AP;KCNE5
Cilium Movement Involved in Cell Motility (GO:0060294)		19	2	0.732352	2.73093	0.165115	1	8632;1770	DNAH17;DNAH9
Cellular Response to pH (GO:0071467)		19	2	0.732352	2.73093	0.165115	1	342372;6337	SCNN1A;PKD1L3
Nitric Oxide Metabolic Process (GO:0046209)		19	2	0.732352	2.73093	0.165115	1	1545;9722	NOS1AP;CYP1B1
High-Density Lipoprotein Particle Remodeling (GO:0034375)		19	2	0.732352	2.73093	0.165115	1	4023;341	LPL;APOC1
Negative Regulation of B Cell Activation (GO:0050869)		20	2	0.770897	2.59438	0.179032	1	7128;1029	CDKN2A;TNFAIP3
Negative Regulation of Biomineral Tissue Development (GO:0070168)		20	2	0.770897	2.59438	0.179032	1	26585;5552	SRGN;GREM1
Negative Regulation of Phosphate Metabolic Process (GO:0045936)		20	2	0.770897	2.59438	0.179032	1	1029;378884	CDKN2A;NHLRC1
Negative Regulation of Microtubule Depolymerization (GO:0007026)		20	2	0.770897	2.59438	0.179032	1	2258;89795	NAV3;FGF13
Response to Cholesterol (GO:0070723)		20	2	0.770897	2.59438	0.179032	1	1234;4040	LRP6;CCR5
Endoplasmic Reticulum Calcium Ion Homeostasis (GO:0032469)		20	2	0.770897	2.59438	0.179032	1	7466;5910	WFS1;RAP1GDS1
Regulation of Dendritic Spine Development (GO:0060998)		20	2	0.770897	2.59438	0.179032	1	116443;5802	PTPRS;GRIN3A
Axon Extension (GO:0048675)		20	2	0.770897	2.59438	0.179032	1	10371;4131	MAP1B;SEMA3A
Positive Regulation of Macrophage Migration (GO:1905523)		20	2	0.770897	2.59438	0.179032	1	1435;146433	IL34;CSF1
Regulation of Granulocyte Chemotaxis (GO:0071622)		20	2	0.770897	2.59438	0.179032	1	1435;146433	IL34;CSF1
Neuromuscular Process (GO:0050905)		20	2	0.770897	2.59438	0.179032	1	497189;3198	TIFAB;HOXA1
Hippo Signaling (GO:0035329)		20	2	0.770897	2.59438	0.179032	1	8428;23286	STK24;WWC1
Oligodendrocyte Differentiation (GO:0048709)		20	2	0.770897	2.59438	0.179032	1	6469;745	SHH;MYRF
Dolichol-Linked Oligosaccharide Biosynthetic Process (GO:0006488)		20	2	0.770897	2.59438	0.179032	1	79087;57171	ALG12;DOLPP1
Protein Localization to Centrosome (GO:0071539)		21	2	0.809442	2.47084	0.193119	1	8428;9851	KIAA0753;STK24
Positive Regulation of Nervous System Process (GO:0031646)		21	2	0.809442	2.47084	0.193119	1	745;57555	NLGN2;MYRF
Regulation of Systemic Arterial Blood Pressure (GO:0003073)		21	2	0.809442	2.47084	0.193119	1	6518;3818	KLKB1;SLC2A5
Regulation of Biosynthetic Process (GO:0009889)		21	2	0.809442	2.47084	0.193119	1	5105;9722	NOS1AP;PCK1
Neuromuscular Synaptic Transmission (GO:0007274)		21	2	0.809442	2.47084	0.193119	1	1137;23095	KIF1B;CHRNA4
Peptidyl-Tyrosine Dephosphorylation (GO:0035335)		21	2	0.809442	2.47084	0.193119	1	5802;378884	NHLRC1;PTPRS
Regulation of Fibroblast Growth Factor Receptor Signaling Pathway (GO:0040036)		21	2	0.809442	2.47084	0.193119	1	2258;10252	SPRY1;FGF13
Regulation of Lipopolysaccharide-Mediated Signaling Pathway (GO:0031664)		21	2	0.809442	2.47084	0.193119	1	10221;9450	TRIB1;LY86
Regulation of Macrophage Chemotaxis (GO:0010758)		21	2	0.809442	2.47084	0.193119	1	1435;146433	IL34;CSF1
Intrinsic Apoptotic Signaling Pathway in Response to DNA Damage by P53 Class Mediator (GO:0042771)		21	2	0.809442	2.47084	0.193119	1	51065;29965	RPS27L;CDIP1
Regulation of Cell-Substrate Junction Assembly (GO:0090109)		21	2	0.809442	2.47084	0.193119	1	7414;9079	LDB2;VCL
Oligosaccharide Biosynthetic Process (GO:0009312)		21	2	0.809442	2.47084	0.193119	1	6487;8705	ST3GAL3;B3GALT4
Inhibitory Synapse Assembly (GO:1904862)		21	2	0.809442	2.47084	0.193119	1	2258;2557	FGF13;GABRA4
Tricarboxylic Acid Cycle (GO:0006099)		22	2	0.847987	2.35853	0.207342	1	4967;6392	SDHD;OGDH
RNA Destabilization (GO:0050779)		22	2	0.847987	2.35853	0.207342	1	51441;1797	DXO;YTHDF2
Positive Regulation of Epithelial Cell Differentiation (GO:0030858)		22	2	0.847987	2.35853	0.207342	1	2258;6424	SFRP4;FGF13
Focal Adhesion Assembly (GO:0048041)		22	2	0.847987	2.35853	0.207342	1	1009;7205	TRIP6;CDH11
Myotube Differentiation (GO:0014902)		22	2	0.847987	2.35853	0.207342	1	8912;51804	CACNA1H;SIX4
T-helper Cell Differentiation (GO:0042093)		22	2	0.847987	2.35853	0.207342	1	5295;84766	PIK3R1;CRACR2A
Diacylglycerol Metabolic Process (GO:0046339)		22	2	0.847987	2.35853	0.207342	1	57678;1607	DGKB;GPAM
Regulation of Neurotransmitter Receptor Activity (GO:0099601)		22	2	0.847987	2.35853	0.207342	1	23542;57555	NLGN2;MAPK8IP2
Monocyte Chemotaxis (GO:0002548)		22	2	0.847987	2.35853	0.207342	1	1511;5155	PDGFB;CTSG
Phosphatidylglycerol Metabolic Process (GO:0046471)		22	2	0.847987	2.35853	0.207342	1	57678;26279	PLA2G2D;GPAM
Negative Regulation of Protein Depolymerization (GO:1901880)		23	2	0.886532	2.25598	0.221668	1	2258;89795	NAV3;FGF13
Adaptive Imm Resp Based on Som Recomb of Imm Rcptrs Built Frm IgSF Domains (GO:0002460)		23	2	0.886532	2.25598	0.221668	1	7099;3123	TLR4;HLA-DRB1
Potassium Ion Homeostasis (GO:0055075)		23	2	0.886532	2.25598	0.221668	1	57468;480	ATP1A4;SLC12A5
Negative Regulation of Osteoclast Differentiation (GO:0045671)		23	2	0.886532	2.25598	0.221668	1	7099;4982	TLR4;TNFRSF11B
Limb Development (GO:0060173)		23	2	0.886532	2.25598	0.221668	1	26585;1311	GREM1;COMP
Negative Regulation of DNA Binding (GO:0043392)		23	2	0.886532	2.25598	0.221668	1	1869;3725	E2F1;JUN
Microtubule Polymerization or Depolymerization (GO:0031109)		23	2	0.886532	2.25598	0.221668	1	2258;3925	STMN1;FGF13
Maturation of LSU-rRNA (GO:0000470)		23	2	0.886532	2.25598	0.221668	1	11224;51018	RPL35;RRP15
Gamma-Aminobutyric Acid Signaling Pathway (GO:0007214)		23	2	0.886532	2.25598	0.221668	1	5334;2557	PLCL1;GABRA4
Cellular Response to Steroid Hormone Stimulus (GO:0071383)		24	2	0.925077	2.16198	0.23607	1	2099;480	ESR1;ATP1A4
Negative Regulation of Extrinsic Apoptotic Signaling Pathway in Absence of Ligand (GO:2001240)		24	2	0.925077	2.16198	0.23607	1	3084;2070	EYA4;NRG1
Negative Regulation of Signal Transduction in Absence of Ligand (GO:1901099)		24	2	0.925077	2.16198	0.23607	1	3084;2070	EYA4;NRG1
Nucleic Acid Metabolic Process (GO:0090304)		24	2	0.925077	2.16198	0.23607	1	4907;1797	DXO;NT5E
Macrophage Differentiation (GO:0030225)		24	2	0.925077	2.16198	0.23607	1	3123;1435	HLA-DRB1;CSF1
Sodium Ion Homeostasis (GO:0055078)		24	2	0.925077	2.16198	0.23607	1	480;6337	SCNN1A;ATP1A4
Positive Regulation of Interleukin-2 Production (GO:0032743)		24	2	0.925077	2.16198	0.23607	1	940;861	RUNX1;CD28
Chemical Synaptic Transmission, Postsynaptic (GO:0099565)		24	2	0.925077	2.16198	0.23607	1	1137;23542	MAPK8IP2;CHRNA4
Regulation of Postsynaptic Membrane Potential (GO:0060078)		24	2	0.925077	2.16198	0.23607	1	1137;23542	MAPK8IP2;CHRNA4
Positive Regulation of D-glucose Import (GO:0046326)		24	2	0.925077	2.16198	0.23607	1	5295;3667	IRS1;PIK3R1
Positive Regulation of Morphogenesis of an Epithelium (GO:1905332)		24	2	0.925077	2.16198	0.23607	1	2258;51804	FGF13;SIX4
Regulation of Monocyte Chemotaxis (GO:0090025)		24	2	0.925077	2.16198	0.23607	1	26585;5054	SERPINE1;GREM1
Vesicle Transport Along Microtubule (GO:0047496)		24	2	0.925077	2.16198	0.23607	1	23095;146439	BICDL2;KIF1B
Regulation of Extracellular Matrix Organization (GO:1903053)		24	2	0.925077	2.16198	0.23607	1	861;2264	RUNX1;FGFR4
Negative Regulation of Catalytic Activity (GO:0043086)		24	2	0.925077	2.16198	0.23607	1	815;29085	PHPT1;CAMK2A
Positive Regulation of Receptor Internalization (GO:0002092)		24	2	0.925077	2.16198	0.23607	1	6424;26585	SFRP4;GREM1
Stress Granule Assembly (GO:0034063)		24	2	0.925077	2.16198	0.23607	1	636;51441	BICD1;YTHDF2
Actin Filament Polymerization (GO:0030041)		24	2	0.925077	2.16198	0.23607	1	1730;79778	MICALL2;DIAPH2
Secondary Alcohol Biosynthetic Process (GO:1902653)		24	2	0.925077	2.16198	0.23607	1	3638;1718	DHCR24;INSIG1
Endothelial Cell Development (GO:0001885)		24	2	0.925077	2.16198	0.23607	1	1003;2947	GSTM3;CDH5
Response to Zinc Ion (GO:0010043)		25	2	0.963621	2.0755	0.25052	1	728294;4496	D2HGDH;MT1H
Regulation of B Cell Activation (GO:0050864)		25	2	0.963621	2.0755	0.25052	1	7128;30011	SH3KBP1;TNFAIP3
Cellular Response to Low-Density Lipoprotein Particle Stimulus (GO:0071404)		25	2	0.963621	2.0755	0.25052	1	7099;4023	TLR4;LPL
Response to Purine-Containing Compound (GO:0014074)		25	2	0.963621	2.0755	0.25052	1	4907;6261	NT5E;RYR1
Negative Regulation of miRNA Transcription (GO:1902894)		25	2	0.963621	2.0755	0.25052	1	2099;5155	ESR1;PDGFB
Amino Acid Metabolic Process (GO:0006520)		25	2	0.963621	2.0755	0.25052	1	5095;27165	GLS2;PCCA
Cardiac Conduction System Development (GO:0003161)		25	2	0.963621	2.0755	0.25052	1	2702;51312	SLC25A37;GJA5
Regulation of Cell Junction Assembly (GO:1901888)		25	2	0.963621	2.0755	0.25052	1	50848;57502	NLGN4X;F11R
Regulation of Reactive Oxygen Species Biosynthetic Process (GO:1903426)		25	2	0.963621	2.0755	0.25052	1	7099;575	TLR4;ADGRB1
Negative Regulation of Proteolysis Involved in Protein Catabolic Process (GO:1903051)		25	2	0.963621	2.0755	0.25052	1	1029;27074	CDKN2A;LAMP3
Non-Canonical NF-kappaB Signal Transduction (GO:0038061)		25	2	0.963621	2.0755	0.25052	1	8795;257397	TNFRSF10B;TAB3
Negative Regulation of Protein Localization to Nucleus (GO:1900181)		25	2	0.963621	2.0755	0.25052	1	25885;51208	POLR1A;CLDN18
Positive Regulation of Nuclear Division (GO:0051785)		25	2	0.963621	2.0755	0.25052	1	940;5155	PDGFB;CD28
Cholesterol Biosynthetic Process (GO:0006695)		25	2	0.963621	2.0755	0.25052	1	3638;1718	DHCR24;INSIG1
Glycosaminoglycan Biosynthetic Process (GO:0006024)		25	2	0.963621	2.0755	0.25052	1	2651;3037	HAS2;GCNT2
Regulation of Interferon-Alpha Production (GO:0032647)		26	2	1.00217	1.99568	0.264993	1	7099;5802	TLR4;PTPRS
Negative Regulation of miRNA Metabolic Process (GO:2000629)		26	2	1.00217	1.99568	0.264993	1	2099;5155	ESR1;PDGFB
Cardiac Muscle Cell Differentiation (GO:0055007)		26	2	1.00217	1.99568	0.264993	1	3084;26585	NRG1;GREM1
Regulation of Cardiac Muscle Cell Contraction (GO:0086004)		26	2	1.00217	1.99568	0.264993	1	2702;2258	GJA5;FGF13
Amide Transport (GO:0042886)		26	2	1.00217	1.99568	0.264993	1	6563;154664	SLC14A1;ABCA13
Wound Healing, Spreading of Cells (GO:0044319)		26	2	1.00217	1.99568	0.264993	1	389;4321	RHOC;MMP12
Regulation of Chondrocyte Differentiation (GO:0032330)		26	2	1.00217	1.99568	0.264993	1	392255;26585	GDF6;GREM1
Respiratory Tube Development (GO:0030323)		26	2	1.00217	1.99568	0.264993	1	6469;27031	SHH;NPHP3
Regulation of Glucose Metabolic Process (GO:0010906)		26	2	1.00217	1.99568	0.264993	1	5164;3667	PDK2;IRS1
Mitotic G2 DNA Damage Checkpoint Signaling (GO:0007095)		26	2	1.00217	1.99568	0.264993	1	1111;51514	DTL;CHEK1
Regulation of Mitochondrion Organization (GO:0010821)		26	2	1.00217	1.99568	0.264993	1	8878;5910	SQSTM1;RAP1GDS1
Organelle Fusion (GO:0048284)		26	2	1.00217	1.99568	0.264993	1	4832;54332	NME3;GDAP1
Cell-Cell Adhesion Mediated by Cadherin (GO:0044331)		26	2	1.00217	1.99568	0.264993	1	1009;1003	CDH11;CDH5
Synaptic Transmission, Glutamatergic (GO:0035249)		26	2	1.00217	1.99568	0.264993	1	2897;116443	GRIN3A;GRIK1
Cilium-Dependent Cell Motility (GO:0060285)		26	2	1.00217	1.99568	0.264993	1	8632;1770	DNAH17;DNAH9
Secretory Granule Organization (GO:0033363)		26	2	1.00217	1.99568	0.264993	1	282991;5552	BLOC1S2;SRGN
Negative Regulation of Type II Interferon Production (GO:0032689)		27	2	1.04071	1.92176	0.279466	1	7099;3123	TLR4;HLA-DRB1
Dicarboxylic Acid Transport (GO:0006835)		27	2	1.04071	1.92176	0.279466	1	3776;7439	BEST1;KCNK2
Positive Regulation of Response to Endoplasmic Reticulum Stress (GO:1905898)		27	2	1.04071	1.92176	0.279466	1	5295;666	BOK;PIK3R1
Cardiac Muscle Cell Contraction (GO:0086003)		27	2	1.04071	1.92176	0.279466	1	6334;6329	SCN4A;SCN8A
Negative Regulation of Lymphocyte Activation (GO:0051250)		27	2	1.04071	1.92176	0.279466	1	7128;1511	TNFAIP3;CTSG
Response to Interferon-Beta (GO:0035456)		27	2	1.04071	1.92176	0.279466	1	815;10410	IFITM3;CAMK2A
Positive Regulation of Lipid Metabolic Process (GO:0045834)		27	2	1.04071	1.92176	0.279466	1	5105;57540	DISP3;PCK1
Positive Regulation of Signal Transduction by P53 Class Mediator (GO:1901798)		27	2	1.04071	1.92176	0.279466	1	23645;1029	CDKN2A;PPP1R15A
Phospholipid Biosynthetic Process (GO:0008654)		27	2	1.04071	1.92176	0.279466	1	57171;154141	DOLPP1;MBOAT1
Negative Regulation of Protein Polymerization (GO:0032272)		27	2	1.04071	1.92176	0.279466	1	1003;3925	STMN1;CDH5
Positive Regulation of Microtubule Polymerization or Depolymerization (GO:0031112)		27	2	1.04071	1.92176	0.279466	1	79998;89795	NAV3;ANKRD53
Regulation of Microtubule Polymerization or Depolymerization (GO:0031110)		27	2	1.04071	1.92176	0.279466	1	4131;3925	STMN1;MAP1B
Acylglycerol Catabolic Process (GO:0046464)		27	2	1.04071	1.92176	0.279466	1	79152;4023	LPL;FA2H
Regulation of Extrinsic Apoptotic Signaling Pathway in Absence of Ligand (GO:2001239)		28	2	1.07926	1.85313	0.293917	1	3084;2070	EYA4;NRG1
Hexose Biosynthetic Process (GO:0019319)		28	2	1.07926	1.85313	0.293917	1	468;5105	ATF4;PCK1
Cellular Response to Hexose Stimulus (GO:0071331)		28	2	1.07926	1.85313	0.293917	1	6518;5105	PCK1;SLC2A5
Leukocyte Cell-Cell Adhesion (GO:0007159)		28	2	1.07926	1.85313	0.293917	1	4907;50848	NT5E;F11R
Regulation of DNA Recombination (GO:0000018)		28	2	1.07926	1.85313	0.293917	1	1111;10635	RAD51AP1;CHEK1
Regulation of Insulin Secretion Involved in Cellular Response to Glucose Stimulus (GO:0061178)		28	2	1.07926	1.85313	0.293917	1	3123;1080	CFTR;HLA-DRB1
Regulation of Lipid Biosynthetic Process (GO:0046890)		28	2	1.07926	1.85313	0.293917	1	5105;283316	CD163L1;PCK1
Glial Cell Differentiation (GO:0010001)		28	2	1.07926	1.85313	0.293917	1	6469;745	SHH;MYRF
Long-Term Synaptic Potentiation (GO:0060291)		28	2	1.07926	1.85313	0.293917	1	815;6543	SLC8A2;CAMK2A
Positive Regulation of Microtubule Polymerization (GO:0031116)		29	2	1.1178	1.78923	0.308327	1	79998;89795	NAV3;ANKRD53
miRNA Processing (GO:0035196)		29	2	1.1178	1.78923	0.308327	1	6428;79753	SRSF3;SNIP1
Negative Regulation of Mitotic Cell Cycle (GO:0045930)		29	2	1.1178	1.78923	0.308327	1	1111;1620	CHEK1;BRINP1
Negative Regulation of Interleukin-6 Production (GO:0032715)		29	2	1.1178	1.78923	0.308327	1	7128;7099	TLR4;TNFAIP3
Regulation of Chemotaxis (GO:0050920)		29	2	1.1178	1.78923	0.308327	1	5156;5155	PDGFB;PDGFRA
Lamellipodium Organization (GO:0097581)		29	2	1.1178	1.78923	0.308327	1	7414;29085	PHPT1;VCL
Positive Regulation of Interleukin-10 Production (GO:0032733)		29	2	1.1178	1.78923	0.308327	1	7099;940	TLR4;CD28
Dorsal/Ventral Pattern Formation (GO:0009953)		29	2	1.1178	1.78923	0.308327	1	6469;26585	SHH;GREM1
Regulation of Stress-Activated MAPK Cascade (GO:0032872)		29	2	1.1178	1.78923	0.308327	1	2308;26585	FOXO1;GREM1
Negative Regulation of Wound Healing (GO:0061045)		29	2	1.1178	1.78923	0.308327	1	2258;5054	SERPINE1;FGF13
Response to Alcohol (GO:0097305)		30	2	1.15635	1.72959	0.322678	1	1234;116443	GRIN3A;CCR5
Negative Regulation of Fat Cell Differentiation (GO:0045599)		30	2	1.15635	1.72959	0.322678	1	1869;2308	FOXO1;E2F1
Positive Regulation of Cell Development (GO:0010720)		30	2	1.15635	1.72959	0.322678	1	4321;5176	SERPINF1;MMP12
Regulation of Mitochondrial Membrane Potential (GO:0051881)		30	2	1.15635	1.72959	0.322678	1	1029;138429	CDKN2A;PIP5KL1
Artery Morphogenesis (GO:0048844)		30	2	1.15635	1.72959	0.322678	1	2702;3198	GJA5;HOXA1
Positive Regulation of D-glucose Transmembrane Transport (GO:0010828)		30	2	1.15635	1.72959	0.322678	1	5295;3667	IRS1;PIK3R1
Female Gamete Generation (GO:0007292)		30	2	1.15635	1.72959	0.322678	1	1730;94027	DIAPH2;CGB7
Positive Regulation of Nitric Oxide Biosynthetic Process (GO:0045429)		30	2	1.15635	1.72959	0.322678	1	7099;2099	TLR4;ESR1
Regulation of Regulated Secretory Pathway (GO:1903305)		30	2	1.15635	1.72959	0.322678	1	341359;55503	SYT10;TRPV6
Response to Steroid Hormone (GO:0048545)		31	2	1.19489	1.67379	0.336951	1	3725;480	ATP1A4;JUN
Chondrocyte Differentiation (GO:0002062)		31	2	1.19489	1.67379	0.336951	1	861;864	RUNX1;RUNX3
Response to Estradiol (GO:0032355)		31	2	1.19489	1.67379	0.336951	1	2099;8835	ESR1;SOCS2
Chromosome Organization (GO:0051276)		31	2	1.19489	1.67379	0.336951	1	201161;9079	LDB2;CENPV
Extrinsic Apoptotic Signaling Pathway via Death Domain Receptors (GO:0008625)		31	2	1.19489	1.67379	0.336951	1	8795;282991	BLOC1S2;TNFRSF10B
Skeletal Muscle Organ Development (GO:0060538)		31	2	1.19489	1.67379	0.336951	1	51804;51312	SLC25A37;SIX4
Positive Regulation of Nitric Oxide Metabolic Process (GO:1904407)		31	2	1.19489	1.67379	0.336951	1	7099;2099	TLR4;ESR1
Phosphatidic Acid Biosynthetic Process (GO:0006654)		31	2	1.19489	1.67379	0.336951	1	57678;1607	DGKB;GPAM
Integrated Stress Response Signaling (GO:0140467)		32	2	1.23344	1.62149	0.351133	1	468;3725	ATF4;JUN
Regulation of Small Molecule Metabolic Process (GO:0062012)		32	2	1.23344	1.62149	0.351133	1	51422;5164	PDK2;PRKAG2
Regulation of Ras Protein Signal Transduction (GO:0046578)		32	2	1.23344	1.62149	0.351133	1	8878;10252	SPRY1;SQSTM1
Regulation of Macrophage Derived Foam Cell Differentiation (GO:0010743)		32	2	1.23344	1.62149	0.351133	1	4023;1435	LPL;CSF1
Constitutive Heterochromatin Formation (GO:0140719)		32	2	1.23344	1.62149	0.351133	1	3070;201161	HELLS;CENPV
Actin Filament Bundle Organization (GO:0061572)		32	2	1.23344	1.62149	0.351133	1	80115;134549	BAIAP2L2;SHROOM1
Negative Regulation of Endocytosis (GO:0045806)		33	2	1.27198	1.57235	0.365209	1	341;90678	LRSAM1;APOC1
Positive Regulation of Mononuclear Cell Migration (GO:0071677)		33	2	1.27198	1.57235	0.365209	1	1435;5054	SERPINE1;CSF1
Negative Regulation of Cytoplasmic Pattern Recognition Receptor Signaling Pathway (GO:0039532)		33	2	1.27198	1.57235	0.365209	1	7128;5802	PTPRS;TNFAIP3
Actin Filament Bundle Assembly (GO:0051017)		33	2	1.27198	1.57235	0.365209	1	80115;134549	BAIAP2L2;SHROOM1
Nucleobase-Containing Compound Metabolic Process (GO:0006139)		34	2	1.31053	1.52611	0.379167	1	1797;7378	DXO;UPP1
Regulation of Cardiac Muscle Contraction (GO:0055117)		34	2	1.31053	1.52611	0.379167	1	2702;5997	RGS2;GJA5
Liver Development (GO:0001889)		34	2	1.31053	1.52611	0.379167	1	27031;5105	NPHP3;PCK1
Negative Regulation of Blood Vessel Endothelial Cell Migration (GO:0043537)		34	2	1.31053	1.52611	0.379167	1	2258;285	ANGPT2;FGF13
Positive Regulation of Macromolecule Metabolic Process (GO:0010604)		34	2	1.31053	1.52611	0.379167	1	7466;1435	WFS1;CSF1
Negative Regulation of Smooth Muscle Cell Proliferation (GO:0048662)		34	2	1.31053	1.52611	0.379167	1	7128;10221	TNFAIP3;TRIB1
Substrate Adhesion-Dependent Cell Spreading (GO:0034446)		34	2	1.31053	1.52611	0.379167	1	5295;79778	PIK3R1;MICALL2
Lung Development (GO:0030324)		34	2	1.31053	1.52611	0.379167	1	6469;27031	SHH;NPHP3
Regulation of Protein Localization to Membrane (GO:1905475)		34	2	1.31053	1.52611	0.379167	1	815;221914	GPC2;CAMK2A
Regulatory ncRNA Processing (GO:0070918)		35	2	1.34907	1.4825	0.392993	1	79753;54456	MOV10L1;SNIP1
Response to Transforming Growth Factor Beta (GO:0071559)		35	2	1.34907	1.4825	0.392993	1	1399;864	RUNX3;CRKL
Cellular Response to Amino Acid Stimulus (GO:0071230)		35	2	1.34907	1.4825	0.392993	1	8452;57559	STAMBPL1;CUL3
Positive Regulation of Immune Effector Process (GO:0002699)		35	2	1.34907	1.4825	0.392993	1	3123;5105	PCK1;HLA-DRB1
Negative Regulation of Endothelial Cell Proliferation (GO:0001937)		35	2	1.34907	1.4825	0.392993	1	7857;64102	SCG2;TNMD
Phosphatidylinositol Phosphate Biosynthetic Process (GO:0046854)		35	2	1.34907	1.4825	0.392993	1	5295;138429	PIK3R1;PIP5KL1
Dendrite Morphogenesis (GO:0048813)		35	2	1.34907	1.4825	0.392993	1	23542;23181	DIP2A;MAPK8IP2
Regulation of Neuronal Synaptic Plasticity (GO:0048168)		35	2	1.34907	1.4825	0.392993	1	815;6543	SLC8A2;CAMK2A
Negative Regulation of Cell Cycle Process (GO:0010948)		35	2	1.34907	1.4825	0.392993	1	1111;286151	FBXO43;CHEK1
Negative Regulation of Hydrolase Activity (GO:0051346)		35	2	1.34907	1.4825	0.392993	1	815;378884	NHLRC1;CAMK2A
Microtubule Polymerization (GO:0046785)		35	2	1.34907	1.4825	0.392993	1	2258;282991	BLOC1S2;FGF13
Negative Regulation of Plasma Membrane Bounded Cell Projection Assembly (GO:0120033)		35	2	1.34907	1.4825	0.392993	1	4070;23329	TBC1D30;TACSTD2
Platelet Aggregation (GO:0070527)		35	2	1.34907	1.4825	0.392993	1	7414;5156	PDGFRA;VCL
Male Meiotic Nuclear Division (GO:0007140)		36	2	1.38761	1.44132	0.406679	1	56603;54456	MOV10L1;CYP26B1
Cellular Response to Vascular Endothelial Growth Factor Stimulus (GO:0035924)		36	2	1.38761	1.44132	0.406679	1	1960;5228	PGF;EGR3
Defense Response to Fungus (GO:0050832)		36	2	1.38761	1.44132	0.406679	1	4852;116842	LEAP2;NPY
Glutathione Metabolic Process (GO:0006749)		36	2	1.38761	1.44132	0.406679	1	2947;2949	GSTM3;GSTM5
Regulation of Sodium Ion Transport (GO:0002028)		36	2	1.38761	1.44132	0.406679	1	480;5187	ATP1A4;PER1
Negative Regulation of Epithelial to Mesenchymal Transition (GO:0010719)		36	2	1.38761	1.44132	0.406679	1	6423;10252	SPRY1;SFRP2
Peptidyl-Threonine Phosphorylation (GO:0018107)		36	2	1.38761	1.44132	0.406679	1	1111;815	CAMK2A;CHEK1
Glutamate Receptor Signaling Pathway (GO:0007215)		36	2	1.38761	1.44132	0.406679	1	2897;116443	GRIN3A;GRIK1
Phosphatidic Acid Metabolic Process (GO:0046473)		36	2	1.38761	1.44132	0.406679	1	57678;1607	DGKB;GPAM
Regulation of Protein Targeting to Mitochondrion (GO:1903214)		37	2	1.42616	1.40237	0.420213	1	1029;79778	CDKN2A;MICALL2
Regulation of mRNA Processing (GO:0050684)		37	2	1.42616	1.40237	0.420213	1	6428;23210	SRSF3;JMJD6
RNA Stabilization (GO:0043489)		37	2	1.42616	1.40237	0.420213	1	1869;54888	NSUN2;E2F1
Positive Regulation of Receptor Signaling Pathway via STAT (GO:1904894)		37	2	1.42616	1.40237	0.420213	1	815;1545	CAMK2A;CYP1B1
Ventricular Septum Development (GO:0003281)		37	2	1.42616	1.40237	0.420213	1	2702;6091	ROBO1;GJA5
Regulation of Metal Ion Transport (GO:0010959)		37	2	1.42616	1.40237	0.420213	1	480;5187	ATP1A4;PER1
Heart Looping (GO:0001947)		37	2	1.42616	1.40237	0.420213	1	6469;27031	SHH;NPHP3
Negative Regulation of Protein Secretion (GO:0050709)		37	2	1.42616	1.40237	0.420213	1	2308;3667	IRS1;FOXO1
Regulation of Receptor Internalization (GO:0002090)		37	2	1.42616	1.40237	0.420213	1	6424;26585	SFRP4;GREM1
Negative Regulation of mRNA Catabolic Process (GO:1902373)		38	2	1.4647	1.36546	0.433588	1	1869;11187	PKP3;E2F1
Positive Regulation of Neuron Apoptotic Process (GO:0043525)		38	2	1.4647	1.36546	0.433588	1	468;2045	ATF4;EPHA7
Base-Excision Repair (GO:0006284)		38	2	1.4647	1.36546	0.433588	1	25885;7374	POLR1A;UNG
Regulation of DNA Binding (GO:0051101)		38	2	1.4647	1.36546	0.433588	1	1869;3725	E2F1;JUN
Lysosome Localization (GO:0032418)		38	2	1.4647	1.36546	0.433588	1	282991;284021	BLOC1S2;MILR1
Membrane Assembly (GO:0071709)		38	2	1.4647	1.36546	0.433588	1	57555;57502	NLGN4X;NLGN2
Regulation of Microtubule Cytoskeleton Organization (GO:0070507)		38	2	1.4647	1.36546	0.433588	1	3925;23187	STMN1;PHLDB1
Regulation of Axonogenesis (GO:0050770)		38	2	1.4647	1.36546	0.433588	1	6091;4168	MCF2;ROBO1
Positive Regulation of Lipid Biosynthetic Process (GO:0046889)		39	2	1.50325	1.33045	0.446795	1	84879;5105	MFSD2A;PCK1
Positive Regulation of Double-Strand Break Repair via Homologous Recombination (GO:1905168)		39	2	1.50325	1.33045	0.446795	1	10635;8607	RAD51AP1;RUVBL1
Negative Regulation of Type I Interferon Production (GO:0032480)		39	2	1.50325	1.33045	0.446795	1	8452;5802	PTPRS;CUL3
Regulation of Apoptotic Signaling Pathway (GO:2001233)		39	2	1.50325	1.33045	0.446795	1	23542;51384	MAPK8IP2;WNT16
Digestive Tract Development (GO:0048565)		39	2	1.50325	1.33045	0.446795	1	4852;140628	NPY;GATA5
Regulation of Filopodium Assembly (GO:0051489)		39	2	1.50325	1.33045	0.446795	1	5295;2596	GAP43;PIK3R1
Cellular Response to Retinoic Acid (GO:0071300)		39	2	1.50325	1.33045	0.446795	1	4058;1620	LTK;BRINP1
Semaphorin-Plexin Signaling Pathway (GO:0071526)		39	2	1.50325	1.33045	0.446795	1	10371;9723	SEMA3E;SEMA3A
Regulation of Hippo Signaling (GO:0035330)		40	2	1.54179	1.29719	0.459828	1	8428;23286	STK24;WWC1
Protein Destabilization (GO:0031648)		40	2	1.54179	1.29719	0.459828	1	8452;1029	CDKN2A;CUL3
Aortic Valve Development (GO:0003176)		40	2	1.54179	1.29719	0.459828	1	6091;140628	ROBO1;GATA5
Embryonic Heart Tube Morphogenesis (GO:0003143)		40	2	1.54179	1.29719	0.459828	1	6469;27031	SHH;NPHP3
Regulation of Cellular Component Size (GO:0032535)		40	2	1.54179	1.29719	0.459828	1	282991;23108	BLOC1S2;RAP1GAP2
Ribosome Assembly (GO:0042255)		40	2	1.54179	1.29719	0.459828	1	51065;51001	RPS27L;MTERF3
Regulation of Potassium Ion Transmembrane Transport (GO:1901379)		40	2	1.54179	1.29719	0.459828	1	23630;9722	NOS1AP;KCNE5
Import Into the Mitochondrion (GO:0170036)		41	2	1.58034	1.26555	0.472681	1	286097;51312	SLC25A37;MICU3
Regulation of Peptidyl-Tyrosine Phosphorylation (GO:0050730)		41	2	1.58034	1.26555	0.472681	1	6423;2045	EPHA7;SFRP2
Determination of Heart Left/Right Asymmetry (GO:0061371)		41	2	1.58034	1.26555	0.472681	1	6469;27031	SHH;NPHP3
Regulation of Chemokine Production (GO:0032642)		41	2	1.58034	1.26555	0.472681	1	7099;4023	TLR4;LPL
Regulation of Nervous System Development (GO:0051960)		41	2	1.58034	1.26555	0.472681	1	51441;84667	YTHDF2;HES7
Antibacterial Humoral Response (GO:0019731)		41	2	1.58034	1.26555	0.472681	1	4852;1511	NPY;CTSG
DNA Recombination (GO:0006310)		42	2	1.61888	1.23542	0.485347	1	83990;25885	POLR1A;BRIP1
Determination of Left/Right Symmetry (GO:0007368)		42	2	1.61888	1.23542	0.485347	1	6469;27031	SHH;NPHP3
Mitotic G2/M Transition Checkpoint (GO:0044818)		42	2	1.61888	1.23542	0.485347	1	1111;51514	DTL;CHEK1
Blood Vessel Diameter Maintenance (GO:0097746)		42	2	1.61888	1.23542	0.485347	1	27345;3792	KCNMB4;KEL
Negative Regulation of Tumor Necrosis Factor Production (GO:0032720)		43	2	1.65743	1.20669	0.497822	1	7128;7099	TLR4;TNFAIP3
- Reg of Phosphatidylinositol 3-Kinase/Prot Kinase B Signal Transduction (GO:0051898)		43	2	1.65743	1.20669	0.497822	1	138429;23239	PIP5KL1;PHLPP1
Mitophagy (GO:0000423)		43	2	1.65743	1.20669	0.497822	1	8878;84557	SQSTM1;MAP1LC3A
Ephrin Receptor Signaling Pathway (GO:0048013)		43	2	1.65743	1.20669	0.497822	1	285220;2045	EPHA7;EPHA6
Non-Canonical Wnt Signaling Pathway (GO:0035567)		43	2	1.65743	1.20669	0.497822	1	6424;6423	SFRP4;SFRP2
Extracellular Matrix Disassembly (GO:0022617)		43	2	1.65743	1.20669	0.497822	1	4321;1511	CTSG;MMP12
Cell Cycle G2/M Phase Transition (GO:0044839)		43	2	1.65743	1.20669	0.497822	1	26993;10270	AKAP8L;AKAP8
Regulation of Microtubule-Based Process (GO:0032886)		43	2	1.65743	1.20669	0.497822	1	636;23187	BICD1;PHLDB1
Ribosomal Large Subunit Biogenesis (GO:0042273)		43	2	1.65743	1.20669	0.497822	1	51018;51491	NOP16;RRP15
Regulation of Exocytosis (GO:0017157)		43	2	1.65743	1.20669	0.497822	1	1080;203190	LGI3;CFTR
Positive Regulation of Peptide Hormone Secretion (GO:0090277)		44	2	1.69597	1.17926	0.510103	1	57555;286676	ILDR1;NLGN2
Proton Transmembrane Transport (GO:1902600)		44	2	1.69597	1.17926	0.510103	1	525;480	ATP1A4;ATP6V1B1
Regulation of Transport (GO:0051049)		44	2	1.69597	1.17926	0.510103	1	57540;23286	DISP3;WWC1
Bone Development (GO:0060348)		44	2	1.69597	1.17926	0.510103	1	6424;56603	SFRP4;CYP26B1
Negative Regulation of Response to Biotic Stimulus (GO:0002832)		44	2	1.69597	1.17926	0.510103	1	7128;10221	TNFAIP3;TRIB1
Protein Sumoylation (GO:0016925)		44	2	1.69597	1.17926	0.510103	1	1029;6804	CDKN2A;STX1A
Regulation of Calcium-Mediated Signaling (GO:0050848)		44	2	1.69597	1.17926	0.510103	1	6543;5156	SLC8A2;PDGFRA
Positive Regulation of Cytokine-Mediated Signaling Pathway (GO:0001961)		45	2	1.73452	1.15306	0.522185	1	958;1435	CD40;CSF1
Negative Regulation of Tumor Necrosis Factor Superfamily Cytokine Production (GO:1903556)		45	2	1.73452	1.15306	0.522185	1	7128;7099	TLR4;TNFAIP3
Cellular Response to Radiation (GO:0071478)		45	2	1.73452	1.15306	0.522185	1	10635;55119	PRPF38B;RAD51AP1
Cellular Response to Type II Interferon (GO:0071346)		45	2	1.73452	1.15306	0.522185	1	815;7099	TLR4;CAMK2A
Macromolecule Catabolic Process (GO:0009057)		45	2	1.73452	1.15306	0.522185	1	8878;90678	SQSTM1;LRSAM1
Protein Localization to Chromosome (GO:0034502)		45	2	1.73452	1.15306	0.522185	1	25885;2099	ESR1;POLR1A
Response to Amyloid-Beta (GO:1904645)		45	2	1.73452	1.15306	0.522185	1	7099;4321	TLR4;MMP12
Positive Regulation of Kinase Activity (GO:0033674)		45	2	1.73452	1.15306	0.522185	1	8826;3123	HLA-DRB1;IQGAP1
Cellular Component Disassembly (GO:0022411)		45	2	1.73452	1.15306	0.522185	1	4321;1511	CTSG;MMP12
Mitotic Spindle Assembly (GO:0090307)		45	2	1.73452	1.15306	0.522185	1	29127;9493	RACGAP1;KIF23
Regulation of Cell-Substrate Adhesion (GO:0010810)		45	2	1.73452	1.15306	0.522185	1	2651;5155	PDGFB;GCNT2
Monoatomic Anion Transport (GO:0006820)		46	2	1.77306	1.12799	0.534066	1	375611;7439	SLC26A5;BEST1
Sensory Perception (GO:0007600)		46	2	1.77306	1.12799	0.534066	1	1137;4321	CHRNA4;MMP12
Homotypic Cell-Cell Adhesion (GO:0034109)		46	2	1.77306	1.12799	0.534066	1	7414;5156	PDGFRA;VCL
Regulation of Cyclin-Dependent Protein Serine/Threonine Kinase Activity (GO:0000079)		46	2	1.77306	1.12799	0.534066	1	1029;9077	CDKN2A;DIRAS3
Mitotic Nuclear Division (GO:0140014)		46	2	1.77306	1.12799	0.534066	1	2491;200942	KLHDC8B;CENPI
Actin Polymerization or Depolymerization (GO:0008154)		46	2	1.77306	1.12799	0.534066	1	1730;79778	MICALL2;DIAPH2
Oligosaccharide Metabolic Process (GO:0009311)		46	2	1.77306	1.12799	0.534066	1	6487;8705	ST3GAL3;B3GALT4
Regulation of mRNA Catabolic Process (GO:0061013)		47	2	1.81161	1.10399	0.545742	1	51441;11187	YTHDF2;PKP3
Oxidative Phosphorylation (GO:0006119)		47	2	1.81161	1.10399	0.545742	1	6392;7384	SDHD;UQCRC1
Regulation of Intracellular Transport (GO:0032386)		47	2	1.81161	1.10399	0.545742	1	4744;23286	NEFH;WWC1
GPCR Sgnlng Pway, Coupled to Cyclic Nucleotide Second Messenger (GO:0007187)		47	2	1.81161	1.10399	0.545742	1	5745;4852	PTH1R;NPY
Negative Regulation of Phosphorylation (GO:0042326)		48	2	1.85015	1.08099	0.557213	1	1029;84327	ZBED3;CDKN2A
Regulation of Insulin Receptor Signaling Pathway (GO:0046626)		48	2	1.85015	1.08099	0.557213	1	3667;23235	IRS1;SIK2
Positive Regulation of TORC1 Signaling (GO:1904263)		48	2	1.85015	1.08099	0.557213	1	8452;57559	STAMBPL1;CUL3
Nicotinamide Nucleotide Metabolic Process (GO:0046496)		49	2	1.8887	1.05893	0.568477	1	80201;57717	PCDHB16;HKDC1
Regulation of Interferon-Beta Production (GO:0032648)		49	2	1.8887	1.05893	0.568477	1	7099;5802	TLR4;PTPRS
Positive Regulation of Epithelial to Mesenchymal Transition (GO:0010718)		49	2	1.8887	1.05893	0.568477	1	2651;10439	GCNT2;OLFM1
Positive Regulation of Cell-Cell Adhesion (GO:0022409)		49	2	1.8887	1.05893	0.568477	1	2651;11187	GCNT2;PKP3
Regulation of Cell Development (GO:0060284)		49	2	1.8887	1.05893	0.568477	1	51441;84667	YTHDF2;HES7
Macromolecule Glycosylation (GO:0043413)		49	2	1.8887	1.05893	0.568477	1	6487;2651	ST3GAL3;GCNT2
Cellular Response to Ionizing Radiation (GO:0071479)		50	2	1.92724	1.03775	0.579532	1	10635;55119	PRPF38B;RAD51AP1
Inorganic Anion Transport (GO:0015698)		50	2	1.92724	1.03775	0.579532	1	375611;7439	SLC26A5;BEST1
Regulation of Substrate Adhesion-Dependent Cell Spreading (GO:1900024)		50	2	1.92724	1.03775	0.579532	1	1399;4070	TACSTD2;CRKL
Positive Regulation of DNA Recombination (GO:0045911)		50	2	1.92724	1.03775	0.579532	1	10635;8607	RAD51AP1;RUVBL1
Ceramide Metabolic Process (GO:0006672)		50	2	1.92724	1.03775	0.579532	1	79152;8560	DEGS1;FA2H
Positive Regulation of Chemokine Production (GO:0032722)		51	2	1.96579	1.0174	0.590378	1	7099;4023	TLR4;LPL
Cholesterol Transport (GO:0030301)		51	2	1.96579	1.0174	0.590378	1	341;283316	CD163L1;APOC1
RNA Modification (GO:0009451)		51	2	1.96579	1.0174	0.590378	1	54888;23210	NSUN2;JMJD6
Regulation of Cytokine Production Involved in Inflammatory Response (GO:1900015)		52	2	2.00433	0.997838	0.601014	1	7099;5187	TLR4;PER1
Negative Regulation of Immune System Process (GO:0002683)		52	2	2.00433	0.997838	0.601014	1	7128;8878	TNFAIP3;SQSTM1
Negative Regulation of Response to Stimulus (GO:0048585)		52	2	2.00433	0.997838	0.601014	1	7466;8835	SOCS2;WFS1
Positive Regulation of Interleukin-1 Beta Production (GO:0032731)		53	2	2.04288	0.979011	0.611441	1	7099;4023	TLR4;LPL
Sterol Metabolic Process (GO:0016125)		53	2	2.04288	0.979011	0.611441	1	51422;1545	CYP1B1;PRKAG2
B Cell Differentiation (GO:0030183)		53	2	2.04288	0.979011	0.611441	1	5295;973	PIK3R1;CD79A
Regulation of Proteolysis (GO:0030162)		53	2	2.04288	0.979011	0.611441	1	6469;2264	SHH;FGFR4
Regulation of Focal Adhesion Assembly (GO:0051893)		53	2	2.04288	0.979011	0.611441	1	7414;9079	LDB2;VCL
Nucleotide-Excision Repair (GO:0006289)		53	2	2.04288	0.979011	0.611441	1	83990;25885	POLR1A;BRIP1
DNA-templated DNA Replication (GO:0006261)		53	2	2.04288	0.979011	0.611441	1	25885;57418	WDR18;POLR1A
Rho Protein Signal Transduction (GO:0007266)		53	2	2.04288	0.979011	0.611441	1	29127;57449	RACGAP1;PLEKHG5
Myeloid Cell Differentiation (GO:0030099)		54	2	2.08142	0.960881	0.621659	1	29127;861	RACGAP1;RUNX1
Adenylate Cyclase-Inhibiting G Protein-Coupled Receptor Signaling Pathway (GO:0007193)		54	2	2.08142	0.960881	0.621659	1	165140;5996	OXER1;RGS1
Positive Regulation of Protein Localization to Plasma Membrane (GO:1903078)		55	2	2.11997	0.943411	0.631668	1	5295;8878	PIK3R1;SQSTM1
Heart Morphogenesis (GO:0003007)		55	2	2.11997	0.943411	0.631668	1	55636;10439	CHD7;OLFM1
Vesicle Organization (GO:0016050)		56	2	2.15851	0.926564	0.64147	1	8878;5552	SRGN;SQSTM1
Negative Regulation of Innate Immune Response (GO:0045824)		56	2	2.15851	0.926564	0.64147	1	7128;51441	TNFAIP3;YTHDF2
Memory (GO:0007613)		56	2	2.15851	0.926564	0.64147	1	2258;6543	SLC8A2;FGF13
Response to Reactive Oxygen Species (GO:0000302)		56	2	2.15851	0.926564	0.64147	1	5156;5164	PDK2;PDGFRA
Positive Regulation of Protein Localization to Cell Periphery (GO:1904377)		57	2	2.19706	0.910309	0.651065	1	5295;8878	PIK3R1;SQSTM1
Response to Retinoic Acid (GO:0032526)		57	2	2.19706	0.910309	0.651065	1	4058;1620	LTK;BRINP1
ERBB Signaling Pathway (GO:0038127)		57	2	2.19706	0.910309	0.651065	1	3084;8826	NRG1;IQGAP1
Fatty Acid Catabolic Process (GO:0009062)		58	2	2.2356	0.894614	0.660455	1	79152;5095	PCCA;FA2H
Positive Regulation of Cell Cycle (GO:0045787)		58	2	2.2356	0.894614	0.660455	1	1111;4040	LRP6;CHEK1
Antiviral Innate Immune Response (GO:0140374)		58	2	2.2356	0.894614	0.660455	1	81786;84993	UBL7;TRIM7
mRNA Export From Nucleus (GO:0006406)		59	2	2.27415	0.879451	0.669641	1	6428;4927	SRSF3;NUP88
Regulation of Reactive Oxygen Species Metabolic Process (GO:2000377)		59	2	2.27415	0.879451	0.669641	1	1545;5155	PDGFB;CYP1B1
Homophilic Cell Adhesion via Plasma Membrane Adhesion Molecules (GO:0007156)		59	2	2.27415	0.879451	0.669641	1	84665;6091	ROBO1;MYPN
Positive Regulation of Interleukin-8 Production (GO:0032757)		60	2	2.31269	0.864793	0.678625	1	7099;5054	TLR4;SERPINE1
Protein Autoubiquitination (GO:0051865)		60	2	2.31269	0.864793	0.678625	1	8452;90678	CUL3;LRSAM1
Positive Regulation of Interleukin-1 Production (GO:0032732)		60	2	2.31269	0.864793	0.678625	1	7099;4023	TLR4;LPL
Phospholipid Transport (GO:0015914)		60	2	2.31269	0.864793	0.678625	1	341;84879	MFSD2A;APOC1
Protein N-linked Glycosylation (GO:0006487)		62	2	2.38978	0.836897	0.695995	1	79087;57171	ALG12;DOLPP1
Retinoid Metabolic Process (GO:0001523)		62	2	2.38978	0.836897	0.695995	1	1545;56603	CYP26B1;CYP1B1
Spermatid Development (GO:0007286)		62	2	2.38978	0.836897	0.695995	1	161931;84223	IQCG;ADAD2
G1/S Transition of Mitotic Cell Cycle (GO:0000082)		63	2	2.42833	0.823613	0.704385	1	8452;815	CAMK2A;CUL3
Regulation of Cellular Localization (GO:0060341)		63	2	2.42833	0.823613	0.704385	1	51057;23286	WDPCP;WWC1
Regulation of Synapse Assembly (GO:0051963)		63	2	2.42833	0.823613	0.704385	1	57555;57502	NLGN4X;NLGN2
Negative Regulation of Cytokine-Mediated Signaling Pathway (GO:0001960)		63	2	2.42833	0.823613	0.704385	1	51441;6091	ROBO1;YTHDF2
Positive Regulation of Mitotic Cell Cycle Phase Transition (GO:1901992)		63	2	2.42833	0.823613	0.704385	1	8452;51514	DTL;CUL3
Regulation of Viral Genome Replication (GO:0045069)		63	2	2.42833	0.823613	0.704385	1	940;10410	IFITM3;CD28
Positive Regulation of Phagocytosis (GO:0050766)		64	2	2.46687	0.810744	0.712581	1	6441;10326	SFTPD;SIRPB1
Cholesterol Metabolic Process (GO:0008203)		64	2	2.46687	0.810744	0.712581	1	3638;1718	DHCR24;INSIG1
Aerobic Electron Transport Chain (GO:0019646)		64	2	2.46687	0.810744	0.712581	1	6392;7384	SDHD;UQCRC1
Regulation of Cell Communication (GO:0010646)		64	2	2.46687	0.810744	0.712581	1	2702;8835	GJA5;SOCS2
Negative Regulation of Autophagy (GO:0010507)		64	2	2.46687	0.810744	0.712581	1	257397;1982	EIF4G2;TAB3
Fat Cell Differentiation (GO:0045444)		64	2	2.46687	0.810744	0.712581	1	392255;2308	FOXO1;GDF6
Regulation of Phosphorylation (GO:0042325)		64	2	2.46687	0.810744	0.712581	1	1029;9079	CDKN2A;LDB2
Cell Cycle G1/S Phase Transition (GO:0044843)		65	2	2.50542	0.798271	0.720587	1	8452;815	CAMK2A;CUL3
Mitochondrial ATP Synthesis Coupled Electron Transport (GO:0042775)		65	2	2.50542	0.798271	0.720587	1	6392;7384	SDHD;UQCRC1
Regulation of Extrinsic Apoptotic Signaling Pathway (GO:2001236)		65	2	2.50542	0.798271	0.720587	1	7099;7857	TLR4;SCG2
Amide Biosynthetic Process (GO:0043604)		65	2	2.50542	0.798271	0.720587	1	79152;8560	DEGS1;FA2H
RNA Export From Nucleus (GO:0006405)		67	2	2.58251	0.774442	0.736034	1	6428;4927	SRSF3;NUP88
Phagocytosis (GO:0006909)		67	2	2.58251	0.774442	0.736034	1	7099;23210	TLR4;JMJD6
Positive Regulation of Apoptotic Signaling Pathway (GO:2001235)		67	2	2.58251	0.774442	0.736034	1	666;7099	TLR4;BOK
tRNA Modification (GO:0006400)		67	2	2.58251	0.774442	0.736034	1	54888;27304	NSUN2;MOCS3
Positive Regulation of TOR Signaling (GO:0032008)		69	2	2.6596	0.751994	0.750749	1	8452;57559	STAMBPL1;CUL3
Plasma Membrane Organization (GO:0007009)		69	2	2.6596	0.751994	0.750749	1	79152;8560	DEGS1;FA2H
Regulation of DNA Replication (GO:0006275)		70	2	2.69814	0.741251	0.757838	1	8607;83444	INO80B;RUVBL1
Gland Development (GO:0048732)		71	2	2.73668	0.730811	0.764752	1	3084;6469	SHH;NRG1
Positive Regulation of Protein Ubiquitination (GO:0031398)		71	2	2.73668	0.730811	0.764752	1	8452;7466	CUL3;WFS1
Cellular Response to UV (GO:0034644)		72	2	2.77523	0.720661	0.771495	1	468;4321	ATF4;MMP12
Positive Regulation of Interleukin-6 Production (GO:0032755)		72	2	2.77523	0.720661	0.771495	1	7099;4023	TLR4;LPL
Positive Regulation of Macroautophagy (GO:0016239)		72	2	2.77523	0.720661	0.771495	1	378884;90678	NHLRC1;LRSAM1
Positive Regulation of Protein Localization to Membrane (GO:1905477)		74	2	2.85232	0.701184	0.784475	1	5295;8878	PIK3R1;SQSTM1
Glycoprotein Biosynthetic Process (GO:0009101)		74	2	2.85232	0.701184	0.784475	1	6487;2651	ST3GAL3;GCNT2
Positive Regulation of Protein Localization to Nucleus (GO:1900182)		75	2	2.89086	0.691835	0.79072	1	5295;1029	CDKN2A;PIK3R1
Regulation of mRNA Stability (GO:0043488)		75	2	2.89086	0.691835	0.79072	1	1869;51441	YTHDF2;E2F1
Positive Regulation of Protein Secretion (GO:0050714)		76	2	2.92941	0.682732	0.796804	1	7099;57555	TLR4;NLGN2
Regulation of Vesicle-Mediated Transport (GO:0060627)		76	2	2.92941	0.682732	0.796804	1	51090;203190	LGI3;PLLP
Protein Modification by Small Protein Removal (GO:0070646)		78	2	3.0065	0.665226	0.808505	1	7128;57559	TNFAIP3;STAMBPL1
Regulation of Interleukin-8 Production (GO:0032677)		79	2	3.04504	0.656805	0.814128	1	7099;5054	TLR4;SERPINE1
Positive Regulation of Tumor Necrosis Factor Production (GO:0032760)		80	2	3.08359	0.648595	0.819603	1	7099;4023	TLR4;LPL
Epidermis Development (GO:0008544)		80	2	3.08359	0.648595	0.819603	1	3123;60401	EDA2R;HLA-DRB1
+ Reg of Transmembrane Receptor Prot Serine/Threonine Kinase Sgnlng Pway (GO:0090100)		81	2	3.12213	0.640588	0.824933	1	392255;1003	GDF6;CDH5
Macromolecule Modification (GO:0043412)		82	2	3.16068	0.632776	0.830121	1	4482;5875	RABGGTA;MSRA
Peptidyl-Lysine Modification (GO:0018205)		82	2	3.16068	0.632776	0.830121	1	1029;6804	CDKN2A;STX1A
Carbohydrate Metabolic Process (GO:0005975)		83	2	3.19922	0.625152	0.83517	1	6518;57717	PCDHB16;SLC2A5
Nuclear-Transcribed mRNA Catabolic Process (GO:0000956)		83	2	3.19922	0.625152	0.83517	1	54512;1797	DXO;EXOSC4
Positive Regulation of Tumor Necrosis Factor Superfamily Cytokine Production (GO:1903557)		83	2	3.19922	0.625152	0.83517	1	7099;4023	TLR4;LPL
Protein O-linked Glycosylation (GO:0006493)		83	2	3.19922	0.625152	0.83517	1	6487;8705	ST3GAL3;B3GALT4
T Cell Receptor Signaling Pathway (GO:0050852)		84	2	3.23777	0.617709	0.840084	1	3123;940	HLA-DRB1;CD28
Regulation of Type II Interferon Production (GO:0032649)		84	2	3.23777	0.617709	0.840084	1	7099;3123	TLR4;HLA-DRB1
Regulation of Innate Immune Response (GO:0045088)		84	2	3.23777	0.617709	0.840084	1	7128;2268	TNFAIP3;FGR
Negative Regulation of Gene Expression, Epigenetic (GO:0045814)		85	2	3.27631	0.610442	0.844864	1	1111;3070	HELLS;CHEK1
Regulation of Endothelial Cell Migration (GO:0010594)		86	2	3.31486	0.603344	0.849515	1	2258;575	ADGRB1;FGF13
Mitotic Spindle Organization (GO:0007052)		86	2	3.31486	0.603344	0.849515	1	3925;9493	STMN1;KIF23
Positive Regulation of Double-Strand Break Repair (GO:2000781)		87	2	3.3534	0.596409	0.854038	1	10635;8607	RAD51AP1;RUVBL1
Retrograde Transport, Endosome to Golgi (GO:0042147)		87	2	3.3534	0.596409	0.854038	1	7813;29886	SNX8;EVI5
Regulation of TORC1 Signaling (GO:1903432)		88	2	3.39195	0.589632	0.858437	1	8452;57559	STAMBPL1;CUL3
Regulation of Osteoblast Differentiation (GO:0045667)		88	2	3.39195	0.589632	0.858437	1	468;26585	ATF4;GREM1
Phosphatidylinositol Biosynthetic Process (GO:0006661)		88	2	3.39195	0.589632	0.858437	1	5295;138429	PIK3R1;PIP5KL1
Regulation of mRNA Splicing, via Spliceosome (GO:0048024)		90	2	3.46904	0.576529	0.866874	1	6428;23210	SRSF3;JMJD6
Calcium-Mediated Signaling (GO:0019722)		90	2	3.46904	0.576529	0.866874	1	1234;10663	CXCR6;CCR5
Positive Regulation of Immune Response (GO:0050778)		91	2	3.50758	0.570193	0.870917	1	3123;5105	PCK1;HLA-DRB1
Positive Regulation of Phosphorylation (GO:0042327)		91	2	3.50758	0.570193	0.870917	1	3123;146433	IL34;HLA-DRB1
rRNA Metabolic Process (GO:0016072)		91	2	3.50758	0.570193	0.870917	1	54512;57418	WDR18;EXOSC4
Regulation of Immune Response (GO:0050776)		92	2	3.54613	0.563996	0.874847	1	2268;3123	HLA-DRB1;FGR
Positive Regulation of Neuron Projection Development (GO:0010976)		94	2	3.62322	0.551996	0.882379	1	4058;221914	GPC2;LTK
Positive Regulation of Protein Modification Process (GO:0031401)		94	2	3.62322	0.551996	0.882379	1	3123;146433	IL34;HLA-DRB1
Response to UV (GO:0009411)		97	2	3.73885	0.534924	0.892894	1	51514;468	ATF4;DTL
Recombinational Repair (GO:0000725)		98	2	3.7774	0.529465	0.8962	1	10635;25885	POLR1A;RAD51AP1
Cytoplasmic Translation (GO:0002181)		98	2	3.7774	0.529465	0.8962	1	11224;1973	RPL35;EIF4A1
Protein Catabolic Process (GO:0030163)		101	2	3.89303	0.513739	0.905559	1	8878;90678	SQSTM1;LRSAM1
Regulation of Macroautophagy (GO:0016241)		102	2	3.93158	0.508702	0.908499	1	525;378884	NHLRC1;ATP6V1B1
Regulation of Cellular Response to Stress (GO:0080135)		105	2	4.04721	0.494168	0.916814	1	8607;83444	INO80B;RUVBL1
Positive Regulation of NF-kappaB Transcription Factor Activity (GO:0051092)		105	2	4.04721	0.494168	0.916814	1	815;7099	TLR4;CAMK2A
Regulation of G1/S Transition of Mitotic Cell Cycle (GO:2000045)		109	2	4.20139	0.476033	0.926801	1	1869;1029	CDKN2A;E2F1
Endoplasmic Reticulum to Golgi Vesicle-Mediated Transport (GO:0006888)		111	2	4.27848	0.467456	0.93136	1	8452;5875	RABGGTA;CUL3
Double-Strand Break Repair via Homologous Recombination (GO:0000724)		111	2	4.27848	0.467456	0.93136	1	10635;25885	POLR1A;RAD51AP1
Mitotic Cell Cycle Phase Transition (GO:0044772)		112	2	4.31702	0.463282	0.933537	1	8452;815	CAMK2A;CUL3
Regulation of DNA Metabolic Process (GO:0051052)		113	2	4.35557	0.459182	0.935649	1	8607;83444	INO80B;RUVBL1
Golgi Organization (GO:0007030)		127	2	4.8952	0.408564	0.95928	1	643699;653720	GOLGA8M;GOLGA8N
Regulation of Response to External Stimulus (GO:0032101)		127	2	4.8952	0.408564	0.95928	1	2268;8428	FGR;STK24
Macroautophagy (GO:0016236)		149	2	5.74318	0.348239	0.980514	1	8878;84557	SQSTM1;MAP1LC3A
RNA Splicing, via Transesterification Reactions With Bulged Adenosine as Nucleophile (GO:0000377)		162	2	6.24427	0.320294	0.987501	1	143884;79753	SNIP1;CWF19L2
Membrane Organization (GO:0061024)		162	2	6.24427	0.320294	0.987501	1	1803;80115	BAIAP2L2;DPP4
RNA Localization to Cajal Body (GO:0090670)		10	1	0.385449	2.59438	0.325112	1	8607	RUVBL1
Calcium Import Into the Mitochondrion (GO:0036444)		10	1	0.385449	2.59438	0.325112	1	286097	MICU3
Aspartate Family Amino Acid Metabolic Process (GO:0009066)		10	1	0.385449	2.59438	0.325112	1	4482	MSRA
Erythrose 4-Phosphate/Phosphoenolpyruvate Family Amino Acid Catabolic Process (GO:1902222)		10	1	0.385449	2.59438	0.325112	1	2184	FAH
Histone mRNA Catabolic Process (GO:0071044)		10	1	0.385449	2.59438	0.325112	1	54512	EXOSC4
Negative Regulation of B Cell Proliferation (GO:0030889)		10	1	0.385449	2.59438	0.325112	1	1029	CDKN2A
Positive Regulation of Lipid Localization (GO:1905954)		10	1	0.385449	2.59438	0.325112	1	4023	LPL
Regulation of Toll-Like Receptor 2 Signaling Pathway (GO:0034135)		10	1	0.385449	2.59438	0.325112	1	7128	TNFAIP3
Cellular Response to Oxidised Low-Density Lipoprotein Particle Stimulus (GO:0140052)		10	1	0.385449	2.59438	0.325112	1	7099	TLR4
Detection of Stimulus Involved in Sensory Perception of Pain (GO:0062149)		10	1	0.385449	2.59438	0.325112	1	9311	ASIC3
Regulation of Sensory Perception (GO:0051931)		10	1	0.385449	2.59438	0.325112	1	85446	ZFHX2
Regulation of Sensory Perception of Pain (GO:0051930)		10	1	0.385449	2.59438	0.325112	1	85446	ZFHX2
Negative Regulation of Myotube Differentiation (GO:0010832)		10	1	0.385449	2.59438	0.325112	1	168620	BHLHA15
Regulation of Adipose Tissue Development (GO:1904177)		10	1	0.385449	2.59438	0.325112	1	4023	LPL
Self Proteolysis (GO:0097264)		10	1	0.385449	2.59438	0.325112	1	6469	SHH
Positive Regulation of Vascular Endothelial Growth Factor Signaling Pathway (GO:1900748)		10	1	0.385449	2.59438	0.325112	1	6091	ROBO1
Response to Yeast (GO:0001878)		10	1	0.385449	2.59438	0.325112	1	4852	NPY
sno(s)RNA 3'-End Processing (GO:0031126)		10	1	0.385449	2.59438	0.325112	1	54512	EXOSC4
Regulation of Mast Cell Degranulation (GO:0043304)		10	1	0.385449	2.59438	0.325112	1	2268	FGR
Positive Regulation of Chondrocyte Differentiation (GO:0032332)		10	1	0.385449	2.59438	0.325112	1	392255	GDF6
Cellular Response to Prostaglandin Stimulus (GO:0071379)		10	1	0.385449	2.59438	0.325112	1	5737	PTGFR
Regulation of Toll-Like Receptor 9 Signaling Pathway (GO:0034163)		10	1	0.385449	2.59438	0.325112	1	5802	PTPRS
TRIF-dependent Toll-Like Receptor Signaling Pathway (GO:0035666)		10	1	0.385449	2.59438	0.325112	1	7099	TLR4
Regulation of Lipid Transport (GO:0032368)		10	1	0.385449	2.59438	0.325112	1	57540	DISP3
Establishment of Endothelial Intestinal Barrier (GO:0090557)		10	1	0.385449	2.59438	0.325112	1	50848	F11R
Negative Regulation of Lymphocyte Migration (GO:2000402)		10	1	0.385449	2.59438	0.325112	1	969	CD69
Regulation of Chromatin Organization (GO:1902275)		10	1	0.385449	2.59438	0.325112	1	4300	MLLT3
Mitotic DNA Replication (GO:1902969)		10	1	0.385449	2.59438	0.325112	1	64785	GINS3
Positive Regulation of Nitric-Oxide Synthase Activity (GO:0051000)		10	1	0.385449	2.59438	0.325112	1	2099	ESR1
Ubiquitin-Dependent Protein Catabolic Process via the C-end Degron Rule Pathway (GO:0140627)		10	1	0.385449	2.59438	0.325112	1	116138	KLHDC3
Negative Regulation of Interferon-Beta Production (GO:0032688)		10	1	0.385449	2.59438	0.325112	1	5802	PTPRS
Cellular Response to L-leucine (GO:0071233)		10	1	0.385449	2.59438	0.325112	1	57559	STAMBPL1
Response to L-leucine (GO:0043201)		10	1	0.385449	2.59438	0.325112	1	57559	STAMBPL1
Dopamine Transport (GO:0015872)		10	1	0.385449	2.59438	0.325112	1	225689	MAPK15
Positive Regulation of Non-Canonical Wnt Signaling Pathway (GO:2000052)		10	1	0.385449	2.59438	0.325112	1	4300	MLLT3
Regulation of Establishment of Protein Localization to Mitochondrion (GO:1903747)		10	1	0.385449	2.59438	0.325112	1	1029	CDKN2A
Positive Regulation of Branching Involved in Ureteric Bud Morphogenesis (GO:0090190)		10	1	0.385449	2.59438	0.325112	1	51804	SIX4
Positive Regulation of Hemostasis (GO:1900048)		10	1	0.385449	2.59438	0.325112	1	5054	SERPINE1
Peptidyl-Threonine Dephosphorylation (GO:0035970)		10	1	0.385449	2.59438	0.325112	1	22843	PPM1E
Regulation of Mesenchymal Stem Cell Differentiation (GO:2000739)		10	1	0.385449	2.59438	0.325112	1	5156	PDGFRA
Gene Silencing by piRNA-directed DNA Methylation (GO:0141176)		10	1	0.385449	2.59438	0.325112	1	54456	MOV10L1
Transposable Element Silencing by piRNA-mediated DNA Methylation (GO:0141196)		10	1	0.385449	2.59438	0.325112	1	54456	MOV10L1
Positive Regulation of Fatty Acid Oxidation (GO:0046321)		10	1	0.385449	2.59438	0.325112	1	3667	IRS1
Negative Regulation of Intracellular Transport (GO:0032387)		10	1	0.385449	2.59438	0.325112	1	3638	INSIG1
Cellular Response to UV-A (GO:0071492)		10	1	0.385449	2.59438	0.325112	1	4321	MMP12
Surfactant Homeostasis (GO:0043129)		10	1	0.385449	2.59438	0.325112	1	6441	SFTPD
Angiotensin-Activated Signaling Pathway (GO:0038166)		10	1	0.385449	2.59438	0.325112	1	815	CAMK2A
Regulation of Macrophage Migration (GO:1905521)		10	1	0.385449	2.59438	0.325112	1	1435	CSF1
Macrophage Chemotaxis (GO:0048246)		10	1	0.385449	2.59438	0.325112	1	6441	SFTPD
Endocytosis Involved in Viral Entry Into Host Cell (GO:0075509)		10	1	0.385449	2.59438	0.325112	1	1803	DPP4
Receptor-Mediated Endocytosis of Virus by Host Cell (GO:0019065)		10	1	0.385449	2.59438	0.325112	1	1803	DPP4
Positive Regulation of Platelet Activation (GO:0010572)		10	1	0.385449	2.59438	0.325112	1	7099	TLR4
Glutamine Family Amino Acid Biosynthetic Process (GO:0009084)		10	1	0.385449	2.59438	0.325112	1	27165	GLS2
Desmosome Organization (GO:0002934)		10	1	0.385449	2.59438	0.325112	1	11187	PKP3
Regulation of Animal Organ Morphogenesis (GO:2000027)		10	1	0.385449	2.59438	0.325112	1	6469	SHH
Regulation of Granulocyte Differentiation (GO:0030852)		10	1	0.385449	2.59438	0.325112	1	861	RUNX1
Skeletal Muscle Cell Differentiation (GO:0035914)		10	1	0.385449	2.59438	0.325112	1	51804	SIX4
Positive Regulation of Defense Response to Bacterium (GO:1900426)		10	1	0.385449	2.59438	0.325112	1	3818	KLKB1
Tricarboxylic Acid Metabolic Process (GO:0072350)		11	1	0.423993	2.35853	0.351145	1	5105	PCK1
acetyl-CoA Biosynthetic Process (GO:0006085)		11	1	0.423993	2.35853	0.351145	1	23181	DIP2A
Regulation of RNA Metabolic Process (GO:0051252)		11	1	0.423993	2.35853	0.351145	1	51441	YTHDF2
Regulation of Purine Nucleotide Catabolic Process (GO:0033121)		11	1	0.423993	2.35853	0.351145	1	51422	PRKAG2
Glutamine Metabolic Process (GO:0006541)		11	1	0.423993	2.35853	0.351145	1	27165	GLS2
Mitochondrial Fission (GO:0000266)		11	1	0.423993	2.35853	0.351145	1	54332	GDAP1
Glycosaminoglycan Catabolic Process (GO:0006027)		11	1	0.423993	2.35853	0.351145	1	2258	FGF13
Negative Regulation of Extracellular Matrix Organization (GO:1903054)		11	1	0.423993	2.35853	0.351145	1	1803	DPP4
Positive Regulation of Extracellular Matrix Assembly (GO:1901203)		11	1	0.423993	2.35853	0.351145	1	23187	PHLDB1
Regulation of Ferroptosis (GO:0110075)		11	1	0.423993	2.35853	0.351145	1	8878	SQSTM1
Positive Regulation of Vascular Endothelial Growth Factor Receptor Signaling Pathway (GO:0030949)		11	1	0.423993	2.35853	0.351145	1	6091	ROBO1
DNA Deamination (GO:0045006)		11	1	0.423993	2.35853	0.351145	1	54512	EXOSC4
Neurotransmitter Uptake (GO:0001504)		11	1	0.423993	2.35853	0.351145	1	6616	SNAP25
MyD88-independent Toll-Like Receptor Signaling Pathway (GO:0002756)		11	1	0.423993	2.35853	0.351145	1	7099	TLR4
Positive Regulation of Metaphase/Anaphase Transition of Cell Cycle (GO:1902101)		11	1	0.423993	2.35853	0.351145	1	8452	CUL3
Positive Regulation of Triglyceride Biosynthetic Process (GO:0010867)		11	1	0.423993	2.35853	0.351145	1	84879	MFSD2A
Dehydroascorbic Acid Transport (GO:0070837)		11	1	0.423993	2.35853	0.351145	1	6518	SLC2A5
Base-Excision Repair, AP Site Formation (GO:0006285)		11	1	0.423993	2.35853	0.351145	1	7374	UNG
Negative Regulation of Gene Expression via Chromosomal CpG Island Methylation (GO:0044027)		11	1	0.423993	2.35853	0.351145	1	3070	HELLS
Mitochondrial Transcription (GO:0006390)		11	1	0.423993	2.35853	0.351145	1	51001	MTERF3
Negative Regulation of Ubiquitin-Protein Transferase Activity (GO:0051444)		11	1	0.423993	2.35853	0.351145	1	1029	CDKN2A
Defense Response to Tumor Cell (GO:0002357)		11	1	0.423993	2.35853	0.351145	1	8795	TNFRSF10B
Negative Regulation of Homotypic Cell-Cell Adhesion (GO:0034111)		11	1	0.423993	2.35853	0.351145	1	114897	C1QTNF1
Negative Regulation of Potassium Ion Transmembrane Transport (GO:1901380)		11	1	0.423993	2.35853	0.351145	1	23630	KCNE5
Negative Regulation of Epithelial Cell Apoptotic Process (GO:1904036)		11	1	0.423993	2.35853	0.351145	1	7466	WFS1
Regulation of Transferase Activity (GO:0051338)		11	1	0.423993	2.35853	0.351145	1	9079	LDB2
Regulation of Microtubule-Based Movement (GO:0060632)		11	1	0.423993	2.35853	0.351145	1	4744	NEFH
Glial Cell-Derived Neurotrophic Factor Receptor Signaling Pathway (GO:0035860)		11	1	0.423993	2.35853	0.351145	1	2674	GFRA1
Phasic Smooth Muscle Contraction (GO:0014821)		11	1	0.423993	2.35853	0.351145	1	497189	TIFAB
Negative Regulation of Fibrinolysis (GO:0051918)		11	1	0.423993	2.35853	0.351145	1	5054	SERPINE1
Podocyte Differentiation (GO:0072112)		11	1	0.423993	2.35853	0.351145	1	8826	IQGAP1
Adherens Junction Assembly (GO:0034333)		11	1	0.423993	2.35853	0.351145	1	7414	VCL
Ganglion Development (GO:0061548)		11	1	0.423993	2.35853	0.351145	1	10371	SEMA3A
Negative Regulation of Potassium Ion Transport (GO:0043267)		11	1	0.423993	2.35853	0.351145	1	23630	KCNE5
Actin Crosslink Formation (GO:0051764)		11	1	0.423993	2.35853	0.351145	1	80115	BAIAP2L2
Negative Regulation of Adenylate Cyclase Activity (GO:0007194)		11	1	0.423993	2.35853	0.351145	1	2587	GALR1
Macrophage Migration (GO:1905517)		11	1	0.423993	2.35853	0.351145	1	6441	SFTPD
Polysaccharide Biosynthetic Process (GO:0000271)		11	1	0.423993	2.35853	0.351145	1	3037	HAS2
Monoacylglycerol Metabolic Process (GO:0046462)		11	1	0.423993	2.35853	0.351145	1	79152	FA2H
Diol Metabolic Process (GO:0034311)		11	1	0.423993	2.35853	0.351145	1	130367	SGPP2
Sphingoid Metabolic Process (GO:0046519)		11	1	0.423993	2.35853	0.351145	1	130367	SGPP2
Pentose-Phosphate Shunt (GO:0006098)		11	1	0.423993	2.35853	0.351145	1	26227	PHGDH
tRNA 5'-Leader Removal (GO:0001682)		11	1	0.423993	2.35853	0.351145	1	138716	RPP25L
Iron Ion Transmembrane Transport (GO:0034755)		11	1	0.423993	2.35853	0.351145	1	51312	SLC25A37
Myotube Cell Development (GO:0014904)		11	1	0.423993	2.35853	0.351145	1	6261	RYR1
Positive Regulation of Platelet Aggregation (GO:1901731)		11	1	0.423993	2.35853	0.351145	1	50848	F11R
Mitochondrial Electron Transport, Ubiquinol to Cytochrome C (GO:0006122)		11	1	0.423993	2.35853	0.351145	1	7384	UQCRC1
Omega-Hydroxylase P450 Pathway (GO:0097267)		11	1	0.423993	2.35853	0.351145	1	1545	CYP1B1
Extracellular Transport (GO:0006858)		11	1	0.423993	2.35853	0.351145	1	26256	CABYR
Outer Dynein Arm Assembly (GO:0036158)		11	1	0.423993	2.35853	0.351145	1	8632	DNAH17
Negative Regulation of Stem Cell Differentiation (GO:2000737)		12	1	0.462538	2.16198	0.376175	1	51441	YTHDF2
MyD88-dependent Toll-Like Receptor Signaling Pathway (GO:0002755)		12	1	0.462538	2.16198	0.376175	1	7099	TLR4
Purine Ribonucleoside Bisphosphate Metabolic Process (GO:0034035)		12	1	0.462538	2.16198	0.376175	1	8460	TPST1
Primary miRNA Processing (GO:0031053)		12	1	0.462538	2.16198	0.376175	1	6428	SRSF3
Microtubule Anchoring at Microtubule Organizing Center (GO:0072393)		12	1	0.462538	2.16198	0.376175	1	636	BICD1
Cellular Response to Fluid Shear Stress (GO:0071498)		12	1	0.462538	2.16198	0.376175	1	3037	HAS2
Sodium Ion Export Across Plasma Membrane (GO:0036376)		12	1	0.462538	2.16198	0.376175	1	480	ATP1A4
Nucleotide Metabolic Process (GO:0009117)		12	1	0.462538	2.16198	0.376175	1	57717	PCDHB16
Atrial Cardiac Muscle Cell Action Potential (GO:0086014)		12	1	0.462538	2.16198	0.376175	1	23630	KCNE5
Regulation of Actin Nucleation (GO:0051125)		12	1	0.462538	2.16198	0.376175	1	90668	CARMIL3
Negative Regulation of Locomotion (GO:0040013)		12	1	0.462538	2.16198	0.376175	1	4070	TACSTD2
Positive Regulation of Vascular Endothelial Cell Proliferation (GO:1905564)		12	1	0.462538	2.16198	0.376175	1	2258	FGF13
Wound Healing, Spreading of Epidermal Cells (GO:0035313)		12	1	0.462538	2.16198	0.376175	1	4321	MMP12
Regulation of T Cell Mediated Immune Response to Tumor Cell (GO:0002840)		12	1	0.462538	2.16198	0.376175	1	3123	HLA-DRB1
Positive Regulation of Reactive Oxygen Species Biosynthetic Process (GO:1903428)		12	1	0.462538	2.16198	0.376175	1	7099	TLR4
Cell Projection Assembly (GO:0030031)		12	1	0.462538	2.16198	0.376175	1	4744	NEFH
Positive Regulation of CD4-positive, Alpha-Beta T Cell Activation (GO:2000516)		12	1	0.462538	2.16198	0.376175	1	3123	HLA-DRB1
Peptidyl-Tyrosine Autophosphorylation (GO:0038083)		12	1	0.462538	2.16198	0.376175	1	4058	LTK
Negative Regulation of Alcohol Biosynthetic Process (GO:1902931)		12	1	0.462538	2.16198	0.376175	1	3638	INSIG1
Regulation of T Cell Differentiation in Thymus (GO:0033081)		12	1	0.462538	2.16198	0.376175	1	6469	SHH
Muscle Tissue Development (GO:0060537)		12	1	0.462538	2.16198	0.376175	1	6469	SHH
Morphogenesis of a Polarized Epithelium (GO:0001738)		12	1	0.462538	2.16198	0.376175	1	51057	WDPCP
Steroid Hormone Receptor Signaling Pathway (GO:0043401)		12	1	0.462538	2.16198	0.376175	1	2099	ESR1
Positive Regulation of Insulin Receptor Signaling Pathway (GO:0046628)		12	1	0.462538	2.16198	0.376175	1	3667	IRS1
Myelination in Peripheral Nervous System (GO:0022011)		12	1	0.462538	2.16198	0.376175	1	8506	CNTNAP1
Cellular Response to Angiotensin (GO:1904385)		12	1	0.462538	2.16198	0.376175	1	815	CAMK2A
Positive Regulation of Keratinocyte Differentiation (GO:0045618)		12	1	0.462538	2.16198	0.376175	1	2118	ETV4
Pyrimidine Deoxyribonucleotide Catabolic Process (GO:0009223)		12	1	0.462538	2.16198	0.376175	1	7374	UNG
Negative Regulation of Hemostasis (GO:1900047)		12	1	0.462538	2.16198	0.376175	1	5054	SERPINE1
Fibrinolysis (GO:0042730)		12	1	0.462538	2.16198	0.376175	1	5054	SERPINE1
Phospholipid Efflux (GO:0033700)		12	1	0.462538	2.16198	0.376175	1	341	APOC1
Antifungal Humoral Response (GO:0019732)		12	1	0.462538	2.16198	0.376175	1	4852	NPY
Renal Water Homeostasis (GO:0003091)		12	1	0.462538	2.16198	0.376175	1	7466	WFS1
Forebrain Neuron Differentiation (GO:0021879)		12	1	0.462538	2.16198	0.376175	1	26468	LHX6
Response to Muramyl Dipeptide (GO:0032495)		12	1	0.462538	2.16198	0.376175	1	23641	LDOC1
Intracellular Copper Ion Homeostasis (GO:0006878)		12	1	0.462538	2.16198	0.376175	1	1356	CP
Positive Regulation of Leukocyte Degranulation (GO:0043302)		12	1	0.462538	2.16198	0.376175	1	2268	FGR
Microtubule-Based Transport (GO:0099111)		12	1	0.462538	2.16198	0.376175	1	26256	CABYR
L-amino Acid Catabolic Process (GO:0170035)		12	1	0.462538	2.16198	0.376175	1	3034	HAL
Tyrosine Metabolic Process (GO:0006570)		12	1	0.462538	2.16198	0.376175	1	2184	FAH
Detection of Bacterium (GO:0016045)		12	1	0.462538	2.16198	0.376175	1	3123	HLA-DRB1
NADPH Regeneration (GO:0006740)		12	1	0.462538	2.16198	0.376175	1	26227	PHGDH
Very Long-Chain Fatty Acid Biosynthetic Process (GO:0042761)		12	1	0.462538	2.16198	0.376175	1	79993	ELOVL7
Cell-Cell Junction Maintenance (GO:0045217)		12	1	0.462538	2.16198	0.376175	1	57555	NLGN2
Regulation of Short-Term Neuronal Synaptic Plasticity (GO:0048172)		12	1	0.462538	2.16198	0.376175	1	6543	SLC8A2
Cellular Response to Cholesterol (GO:0071397)		12	1	0.462538	2.16198	0.376175	1	4040	LRP6
Negative Regulation of Substrate Adhesion-Dependent Cell Spreading (GO:1900025)		12	1	0.462538	2.16198	0.376175	1	4070	TACSTD2
Detection of Calcium Ion (GO:0005513)		12	1	0.462538	2.16198	0.376175	1	27345	KCNMB4
Quinone Biosynthetic Process (GO:1901663)		12	1	0.462538	2.16198	0.376175	1	23590	PDSS1
Ubiquinone Biosynthetic Process (GO:0006744)		12	1	0.462538	2.16198	0.376175	1	23590	PDSS1
Regulation of Cell Projection Organization (GO:0031344)		13	1	0.501083	1.99568	0.400242	1	84879	MFSD2A
Regulation of Neuron Projection Arborization (GO:0150011)		13	1	0.501083	1.99568	0.400242	1	84879	MFSD2A
Negative Regulation by Host of Viral Transcription (GO:0043922)		13	1	0.501083	1.99568	0.400242	1	3725	JUN
Positive Regulation of Syncytium Formation by Plasma Membrane Fusion (GO:0060143)		13	1	0.501083	1.99568	0.400242	1	575	ADGRB1
Base Conversion or Substitution Editing (GO:0016553)		13	1	0.501083	1.99568	0.400242	1	161931	ADAD2
Steroid Catabolic Process (GO:0006706)		13	1	0.501083	1.99568	0.400242	1	3290	HSD11B1
Positive Regulation by Symbiont of Entry Into Host (GO:0075294)		13	1	0.501083	1.99568	0.400242	1	3123	HLA-DRB1
Positive Regulation of Viral Entry Into Host Cell (GO:0046598)		13	1	0.501083	1.99568	0.400242	1	3123	HLA-DRB1
Glutamine Family Amino Acid Catabolic Process (GO:0009065)		13	1	0.501083	1.99568	0.400242	1	27165	GLS2
Positive Regulation of Glycogen Biosynthetic Process (GO:0045725)		13	1	0.501083	1.99568	0.400242	1	3667	IRS1
Regulation of Carbohydrate Catabolic Process (GO:0043470)		13	1	0.501083	1.99568	0.400242	1	51422	PRKAG2
Regulation of Vascular Associated Smooth Muscle Cell Migration (GO:1904752)		13	1	0.501083	1.99568	0.400242	1	5155	PDGFB
Muscle Filament Sliding (GO:0030049)		13	1	0.501083	1.99568	0.400242	1	4621	MYH3
Reg of Calcium Ion Transmembrane Transport via High Voltage-Gated Calcium Channel (GO:1902514)		13	1	0.501083	1.99568	0.400242	1	9722	NOS1AP
Atrioventricular Valve Development (GO:0003171)		13	1	0.501083	1.99568	0.400242	1	2702	GJA5
Positive Regulation of Heterotypic Cell-Cell Adhesion (GO:0034116)		13	1	0.501083	1.99568	0.400242	1	2651	GCNT2
Regulation of Peroxisome Proliferator Activated Receptor Signaling Pathway (GO:0035358)		13	1	0.501083	1.99568	0.400242	1	55885	LMO3
Regulation of Pattern Recognition Receptor Signaling Pathway (GO:0062207)		13	1	0.501083	1.99568	0.400242	1	5295	PIK3R1
Negative Regulation of Cyclin-Dependent Protein Serine/Threonine Kinase Activity (GO:0045736)		13	1	0.501083	1.99568	0.400242	1	1029	CDKN2A
Regulation of T-helper 17 Cell Lineage Commitment (GO:2000328)		13	1	0.501083	1.99568	0.400242	1	969	CD69
Negative Regulation of Ras Protein Signal Transduction (GO:0046580)		13	1	0.501083	1.99568	0.400242	1	10252	SPRY1
Nuclear RNA Surveillance (GO:0071027)		13	1	0.501083	1.99568	0.400242	1	54512	EXOSC4
Activation of Protein Kinase B Activity (GO:0032148)		13	1	0.501083	1.99568	0.400242	1	3084	NRG1
Positive Regulation of Response to Cytokine Stimulus (GO:0060760)		13	1	0.501083	1.99568	0.400242	1	100130733	LRRC70
Cardiac Left Ventricle Morphogenesis (GO:0003214)		13	1	0.501083	1.99568	0.400242	1	6423	SFRP2
Negative Regulation of Chondrocyte Differentiation (GO:0032331)		13	1	0.501083	1.99568	0.400242	1	26585	GREM1
Negative Regulation of Mononuclear Cell Migration (GO:0071676)		13	1	0.501083	1.99568	0.400242	1	26585	GREM1
Regulation of Gastrulation (GO:0010470)		13	1	0.501083	1.99568	0.400242	1	23187	PHLDB1
Intracellular Cholesterol Transport (GO:0032367)		13	1	0.501083	1.99568	0.400242	1	283316	CD163L1
Sulfate Transmembrane Transport (GO:1902358)		13	1	0.501083	1.99568	0.400242	1	375611	SLC26A5
Positive Regulation of Mitotic Metaphase/Anaphase Transition (GO:0045842)		13	1	0.501083	1.99568	0.400242	1	8452	CUL3
Positive Regulation of Myelination (GO:0031643)		13	1	0.501083	1.99568	0.400242	1	745	MYRF
Protein Localization to Site of Double-Strand Break (GO:1990166)		13	1	0.501083	1.99568	0.400242	1	25885	POLR1A
Granulocyte Activation (GO:0036230)		13	1	0.501083	1.99568	0.400242	1	1511	CTSG
Mitotic G1 DNA Damage Checkpoint Signaling (GO:0031571)		13	1	0.501083	1.99568	0.400242	1	51065	RPS27L
Regulation of Hematopoietic Stem Cell Differentiation (GO:1902036)		13	1	0.501083	1.99568	0.400242	1	51441	YTHDF2
Epigenetic Programming of Gene Expression (GO:0043045)		13	1	0.501083	1.99568	0.400242	1	9077	DIRAS3
Positive Regulation of Protein Tyrosine Kinase Activity (GO:0061098)		13	1	0.501083	1.99568	0.400242	1	146433	IL34
Nuclear Body Organization (GO:0030575)		13	1	0.501083	1.99568	0.400242	1	1029	CDKN2A
Regulation of Attachment of Spindle Microtubules to Kinetochore (GO:0051988)		13	1	0.501083	1.99568	0.400242	1	29127	RACGAP1
Response to Cadmium Ion (GO:0046686)		13	1	0.501083	1.99568	0.400242	1	4496	MT1H
Thymus Development (GO:0048538)		13	1	0.501083	1.99568	0.400242	1	6469	SHH
Response to UV-A (GO:0070141)		13	1	0.501083	1.99568	0.400242	1	4321	MMP12
ERBB2 Signaling Pathway (GO:0038128)		13	1	0.501083	1.99568	0.400242	1	3084	NRG1
Motor Neuron Axon Guidance (GO:0008045)		13	1	0.501083	1.99568	0.400242	1	10371	SEMA3A
Epiboly Involved in Wound Healing (GO:0090505)		13	1	0.501083	1.99568	0.400242	1	389	RHOC
Synaptic Vesicle Membrane Organization (GO:0048499)		13	1	0.501083	1.99568	0.400242	1	6616	SNAP25
Regulation of Retinoic Acid Receptor Signaling Pathway (GO:0048385)		13	1	0.501083	1.99568	0.400242	1	56603	CYP26B1
Regulation of Dephosphorylation (GO:0035303)		13	1	0.501083	1.99568	0.400242	1	378884	NHLRC1
Regulation of Feeding Behavior (GO:0060259)		13	1	0.501083	1.99568	0.400242	1	347148	QRFP
Positive Regulation of Calcium Ion Import (GO:0090280)		13	1	0.501083	1.99568	0.400242	1	5155	PDGFB
Regulation of Establishment of Cell Polarity (GO:2000114)		13	1	0.501083	1.99568	0.400242	1	1003	CDH5
Positive Regulation of Hippo Signaling (GO:0035332)		13	1	0.501083	1.99568	0.400242	1	8428	STK24
Cellular Response to Copper Ion (GO:0071280)		13	1	0.501083	1.99568	0.400242	1	4496	MT1H
Acidic Amino Acid Transport (GO:0015800)		13	1	0.501083	1.99568	0.400242	1	3776	KCNK2
MHC Class II Protein Complex Assembly (GO:0002399)		13	1	0.501083	1.99568	0.400242	1	3123	HLA-DRB1
Peptide Antigen Assembly With MHC Class II Protein Complex (GO:0002503)		13	1	0.501083	1.99568	0.400242	1	3123	HLA-DRB1
tRNA 5'-End Processing (GO:0099116)		13	1	0.501083	1.99568	0.400242	1	138716	RPP25L
Fatty Acid Elongation (GO:0030497)		13	1	0.501083	1.99568	0.400242	1	79993	ELOVL7
acyl-CoA Biosynthetic Process (GO:0071616)		13	1	0.501083	1.99568	0.400242	1	23181	DIP2A
Programmed Necrotic Cell Death (GO:0097300)		13	1	0.501083	1.99568	0.400242	1	3705	ITPK1
Gas Transport (GO:0015669)		13	1	0.501083	1.99568	0.400242	1	6005	RHAG
Cellular Response to Misfolded Protein (GO:0071218)		14	1	0.539628	1.85313	0.423382	1	8452	CUL3
Regulation of Cellular Response to Heat (GO:1900034)		14	1	0.539628	1.85313	0.423382	1	51278	IER5
T Cell Differentiation in Thymus (GO:0033077)		14	1	0.539628	1.85313	0.423382	1	6469	SHH
Negative Regulation of Viral Transcription (GO:0032897)		14	1	0.539628	1.85313	0.423382	1	10410	IFITM3
Response to UV-B (GO:0010224)		14	1	0.539628	1.85313	0.423382	1	4321	MMP12
3'-Phosphoadenosine 5'-Phosphosulfate Metabolic Process (GO:0050427)		14	1	0.539628	1.85313	0.423382	1	8460	TPST1
Regulation of ATP Metabolic Process (GO:1903578)		14	1	0.539628	1.85313	0.423382	1	51422	PRKAG2
GTP Metabolic Process (GO:0046039)		14	1	0.539628	1.85313	0.423382	1	57089	ENTPD7
Intracellular Potassium Ion Homeostasis (GO:0030007)		14	1	0.539628	1.85313	0.423382	1	480	ATP1A4
Actin-Myosin Filament Sliding (GO:0033275)		14	1	0.539628	1.85313	0.423382	1	4621	MYH3
Negative Regulation of Peptidyl-Tyrosine Phosphorylation (GO:0050732)		14	1	0.539628	1.85313	0.423382	1	6423	SFRP2
Negative Regulation of Epithelial Cell Migration (GO:0010633)		14	1	0.539628	1.85313	0.423382	1	4070	TACSTD2
Extrinsic Apoptotic Signaling Pathway in Absence of Ligand (GO:0097192)		14	1	0.539628	1.85313	0.423382	1	666	BOK
Regulation of Immune Effector Process (GO:0002697)		14	1	0.539628	1.85313	0.423382	1	3123	HLA-DRB1
Positive Regulation of Long-Term Synaptic Potentiation (GO:1900273)		14	1	0.539628	1.85313	0.423382	1	8878	SQSTM1
rRNA Catabolic Process (GO:0016075)		14	1	0.539628	1.85313	0.423382	1	54512	EXOSC4
Nucleotide-Binding Domain, Leucine Rich Repeat Containing Receptor Signaling Pathway (GO:0035872)		14	1	0.539628	1.85313	0.423382	1	7128	TNFAIP3
Negative Regulation of Cartilage Development (GO:0061037)		14	1	0.539628	1.85313	0.423382	1	26585	GREM1
Ceramide Transport (GO:0035627)		14	1	0.539628	1.85313	0.423382	1	154664	ABCA13
Regulation of RNA Export From Nucleus (GO:0046831)		14	1	0.539628	1.85313	0.423382	1	54888	NSUN2
Regulation of Response to Cytokine Stimulus (GO:0060759)		14	1	0.539628	1.85313	0.423382	1	100130733	LRRC70
D-glucose Import (GO:0046323)		14	1	0.539628	1.85313	0.423382	1	6518	SLC2A5
Negative Regulation of Fatty Acid Biosynthetic Process (GO:0045717)		14	1	0.539628	1.85313	0.423382	1	341	APOC1
Regulation of Carbohydrate Metabolic Process (GO:0006109)		14	1	0.539628	1.85313	0.423382	1	5164	PDK2
Autophagy of Peroxisome (GO:0030242)		14	1	0.539628	1.85313	0.423382	1	8878	SQSTM1
Pexophagy (GO:0000425)		14	1	0.539628	1.85313	0.423382	1	8878	SQSTM1
Mitotic G1/S Transition Checkpoint Signaling (GO:0044819)		14	1	0.539628	1.85313	0.423382	1	51065	RPS27L
Regulation of rRNA Processing (GO:2000232)		14	1	0.539628	1.85313	0.423382	1	51441	YTHDF2
Regulation of Intrinsic Apoptotic Signaling Pathway in Response to DNA Damage (GO:1902229)		14	1	0.539628	1.85313	0.423382	1	6423	SFRP2
Meiotic Sister Chromatid Cohesion (GO:0051177)		14	1	0.539628	1.85313	0.423382	1	9985	REC8
Cellular Response to Cadmium Ion (GO:0071276)		14	1	0.539628	1.85313	0.423382	1	4496	MT1H
Negative Regulation of Coagulation (GO:0050819)		14	1	0.539628	1.85313	0.423382	1	5054	SERPINE1
Pancreas Development (GO:0031016)		14	1	0.539628	1.85313	0.423382	1	27031	NPHP3
Establishment of Spindle Localization (GO:0051293)		14	1	0.539628	1.85313	0.423382	1	84327	ZBED3
Vascular Endothelial Growth Factor Signaling Pathway (GO:0038084)		14	1	0.539628	1.85313	0.423382	1	5228	PGF
Regulation of Multicellular Organism Growth (GO:0040014)		14	1	0.539628	1.85313	0.423382	1	84879	MFSD2A
Regulation of Establishment or Maintenance of Cell Polarity (GO:0032878)		14	1	0.539628	1.85313	0.423382	1	1003	CDH5
Photoreceptor Cell Development (GO:0042461)		14	1	0.539628	1.85313	0.423382	1	84879	MFSD2A
Cellular Response to Zinc Ion (GO:0071294)		14	1	0.539628	1.85313	0.423382	1	4496	MT1H
Dendrite Self-Avoidance (GO:0070593)		14	1	0.539628	1.85313	0.423382	1	84665	MYPN
Ubiquinone Metabolic Process (GO:0006743)		14	1	0.539628	1.85313	0.423382	1	23590	PDSS1
Intraciliary Anterograde Transport (GO:0035720)		14	1	0.539628	1.85313	0.423382	1	57560	IFT80
Unsaturated Fatty Acid Biosynthetic Process (GO:0006636)		15	1	0.578173	1.72959	0.445631	1	8560	DEGS1
Regulation of Execution Phase of Apoptosis (GO:1900117)		15	1	0.578173	1.72959	0.445631	1	666	BOK
Positive Regulation of Glycogen Metabolic Process (GO:0070875)		15	1	0.578173	1.72959	0.445631	1	3667	IRS1
Regulation of Response to Endoplasmic Reticulum Stress (GO:1905897)		15	1	0.578173	1.72959	0.445631	1	7466	WFS1
Regulation of Fatty Acid Oxidation (GO:0046320)		15	1	0.578173	1.72959	0.445631	1	51422	PRKAG2
Membrane Repolarization During Action Potential (GO:0086011)		15	1	0.578173	1.72959	0.445631	1	23630	KCNE5
Dendritic Cell Chemotaxis (GO:0002407)		15	1	0.578173	1.72959	0.445631	1	1234	CCR5
Fluid Transport (GO:0042044)		15	1	0.578173	1.72959	0.445631	1	51208	CLDN18
Water Transport (GO:0006833)		15	1	0.578173	1.72959	0.445631	1	1080	CFTR
Myoblast Fusion (GO:0007520)		15	1	0.578173	1.72959	0.445631	1	8912	CACNA1H
Positive Regulation of Macrophage Activation (GO:0043032)		15	1	0.578173	1.72959	0.445631	1	7099	TLR4
Negative Regulation of Cyclin-Dependent Protein Kinase Activity (GO:1904030)		15	1	0.578173	1.72959	0.445631	1	1029	CDKN2A
Dendritic Spine Morphogenesis (GO:0060997)		15	1	0.578173	1.72959	0.445631	1	23181	DIP2A
Neuron Fate Commitment (GO:0048663)		15	1	0.578173	1.72959	0.445631	1	6469	SHH
Regulation of Cholesterol Storage (GO:0010885)		15	1	0.578173	1.72959	0.445631	1	4023	LPL
Positive Regulation of DNA Damage Response, Signal Transduction by P53 Class Mediator (GO:0043517)		15	1	0.578173	1.72959	0.445631	1	1029	CDKN2A
Intracellular Sterol Transport (GO:0032366)		15	1	0.578173	1.72959	0.445631	1	283316	CD163L1
Retinal Metabolic Process (GO:0042574)		15	1	0.578173	1.72959	0.445631	1	1545	CYP1B1
Early Endosome to Golgi Transport (GO:0034498)		15	1	0.578173	1.72959	0.445631	1	29886	SNX8
Positive Regulation of Mitotic Sister Chromatid Separation (GO:1901970)		15	1	0.578173	1.72959	0.445631	1	8452	CUL3
Regulation of Triglyceride Biosynthetic Process (GO:0010866)		15	1	0.578173	1.72959	0.445631	1	84879	MFSD2A
tRNA Wobble Base Modification (GO:0002097)		15	1	0.578173	1.72959	0.445631	1	27304	MOCS3
Male Meiosis I (GO:0007141)		15	1	0.578173	1.72959	0.445631	1	54456	MOV10L1
Digestive Tract Morphogenesis (GO:0048546)		15	1	0.578173	1.72959	0.445631	1	5156	PDGFRA
Copper Ion Homeostasis (GO:0055070)		15	1	0.578173	1.72959	0.445631	1	1356	CP
Sympathetic Nervous System Development (GO:0048485)		15	1	0.578173	1.72959	0.445631	1	10371	SEMA3A
Ribosomal Small Subunit Assembly (GO:0000028)		15	1	0.578173	1.72959	0.445631	1	51065	RPS27L
Regulation of Cell Fate Specification (GO:0042659)		15	1	0.578173	1.72959	0.445631	1	2258	FGF13
Protein Localization to Vacuole (GO:0072665)		15	1	0.578173	1.72959	0.445631	1	79589	RNF128
Mitochondrial Ribosome Assembly (GO:0061668)		15	1	0.578173	1.72959	0.445631	1	51001	MTERF3
Negative Regulation of Epithelial Cell Differentiation (GO:0030857)		15	1	0.578173	1.72959	0.445631	1	10252	SPRY1
Cardiac Myofibril Assembly (GO:0055003)		15	1	0.578173	1.72959	0.445631	1	5156	PDGFRA
tRNA Wobble Uridine Modification (GO:0002098)		15	1	0.578173	1.72959	0.445631	1	27304	MOCS3
Regulation of Bone Remodeling (GO:0046850)		15	1	0.578173	1.72959	0.445631	1	26585	GREM1
Neuromuscular Process Controlling Balance (GO:0050885)		15	1	0.578173	1.72959	0.445631	1	497189	TIFAB
Reg of Blood Vessel Endothelial Cell Proliferation Inv in Sprouting Angiogenesis (GO:1903587)		15	1	0.578173	1.72959	0.445631	1	2258	FGF13
Sulfur Amino Acid Metabolic Process (GO:0000096)		15	1	0.578173	1.72959	0.445631	1	4482	MSRA
Keratan Sulfate Proteoglycan Biosynthetic Process (GO:0018146)		15	1	0.578173	1.72959	0.445631	1	6487	ST3GAL3
Negative Regulation of Axon Extension (GO:0030517)		15	1	0.578173	1.72959	0.445631	1	5802	PTPRS
Aorta Development (GO:0035904)		15	1	0.578173	1.72959	0.445631	1	6091	ROBO1
Maturation of LSU-rRNA Frm Tricistronic rRNA Trnscpt (GO:0000463)		15	1	0.578173	1.72959	0.445631	1	11224	RPL35
Microtubule Depolymerization (GO:0007019)		15	1	0.578173	1.72959	0.445631	1	3925	STMN1
Regulation of Vesicle Size (GO:0097494)		15	1	0.578173	1.72959	0.445631	1	282991	BLOC1S2
Triglyceride Catabolic Process (GO:0019433)		15	1	0.578173	1.72959	0.445631	1	4023	LPL
Nucleotide Biosynthetic Process (GO:0009165)		16	1	0.616718	1.62149	0.467023	1	57717	PCDHB16
Mitochondrial Calcium Ion Transmembrane Transport (GO:0006851)		16	1	0.616718	1.62149	0.467023	1	286097	MICU3
Response to Ethanol (GO:0045471)		16	1	0.616718	1.62149	0.467023	1	116443	GRIN3A
Cellular Response to Glucocorticoid Stimulus (GO:0071385)		16	1	0.616718	1.62149	0.467023	1	5105	PCK1
Oxoacid Metabolic Process (GO:0043436)		16	1	0.616718	1.62149	0.467023	1	8460	TPST1
Regulation of Mitochondrial Membrane Permeability (GO:0046902)		16	1	0.616718	1.62149	0.467023	1	815	CAMK2A
Purine Ribonucleotide Catabolic Process (GO:0009154)		16	1	0.616718	1.62149	0.467023	1	4907	NT5E
Negative Regulation of Striated Muscle Cell Differentiation (GO:0051154)		16	1	0.616718	1.62149	0.467023	1	168620	BHLHA15
Positive Regulation of Smooth Muscle Cell Migration (GO:0014911)		16	1	0.616718	1.62149	0.467023	1	5155	PDGFB
Negative Regulation of Myoblast Differentiation (GO:0045662)		16	1	0.616718	1.62149	0.467023	1	126272	EID2B
Positive Regulation of Collagen Biosynthetic Process (GO:0032967)		16	1	0.616718	1.62149	0.467023	1	861	RUNX1
Positive Regulation of Collagen Metabolic Process (GO:0010714)		16	1	0.616718	1.62149	0.467023	1	861	RUNX1
Positive Regulation of Glial Cell Differentiation (GO:0045687)		16	1	0.616718	1.62149	0.467023	1	146433	IL34
Regulation of D-glucose Transmembrane Transport (GO:0010827)		16	1	0.616718	1.62149	0.467023	1	51422	PRKAG2
Positive Regulation of Regulatory T Cell Differentiation (GO:0045591)		16	1	0.616718	1.62149	0.467023	1	3123	HLA-DRB1
Regulation of Interleukin-1 Production (GO:0032652)		16	1	0.616718	1.62149	0.467023	1	7099	TLR4
Positive Chemotaxis (GO:0050918)		16	1	0.616718	1.62149	0.467023	1	7857	SCG2
Regulation of Protein Sumoylation (GO:0033233)		16	1	0.616718	1.62149	0.467023	1	1029	CDKN2A
Positive Regulation of Cell Migration Involved in Sprouting Angiogenesis (GO:0090050)		16	1	0.616718	1.62149	0.467023	1	2258	FGF13
Lipopolysaccharide-Mediated Signaling Pathway (GO:0031663)		16	1	0.616718	1.62149	0.467023	1	7099	TLR4
Membrane Raft Organization (GO:0031579)		16	1	0.616718	1.62149	0.467023	1	79152	FA2H
Positive Regulation of Dendrite Extension (GO:1903861)		16	1	0.616718	1.62149	0.467023	1	114804	RNF157
Pharyngeal System Development (GO:0060037)		16	1	0.616718	1.62149	0.467023	1	51804	SIX4
Gastrulation (GO:0007369)		16	1	0.616718	1.62149	0.467023	1	27031	NPHP3
Protein Autoprocessing (GO:0016540)		16	1	0.616718	1.62149	0.467023	1	745	MYRF
Positive Regulation of Autophagosome Assembly (GO:2000786)		16	1	0.616718	1.62149	0.467023	1	90678	LRSAM1
Regulation of Oligodendrocyte Differentiation (GO:0048713)		16	1	0.616718	1.62149	0.467023	1	146433	IL34
Cellular Response to Alkaloid (GO:0071312)		16	1	0.616718	1.62149	0.467023	1	6261	RYR1
Transposable Element Silencing by Heterochromatin Formation (GO:0141005)		16	1	0.616718	1.62149	0.467023	1	54456	MOV10L1
Autonomic Nervous System Development (GO:0048483)		16	1	0.616718	1.62149	0.467023	1	10371	SEMA3A
Regulation of Secretion (GO:0051046)		16	1	0.616718	1.62149	0.467023	1	3084	NRG1
Regulation of Viral Life Cycle (GO:1903900)		16	1	0.616718	1.62149	0.467023	1	27074	LAMP3
Peptide Catabolic Process (GO:0043171)		16	1	0.616718	1.62149	0.467023	1	1636	ACE
Regulation of Adenylate Cyclase Activity (GO:0045761)		16	1	0.616718	1.62149	0.467023	1	2587	GALR1
Negative Regulation of Protein Processing (GO:0010955)		16	1	0.616718	1.62149	0.467023	1	5054	SERPINE1
Postsynaptic Membrane Organization (GO:0001941)		16	1	0.616718	1.62149	0.467023	1	57555	NLGN2
Response to Copper Ion (GO:0046688)		16	1	0.616718	1.62149	0.467023	1	4496	MT1H
Membrane Lipid Metabolic Process (GO:0006643)		16	1	0.616718	1.62149	0.467023	1	1545	CYP1B1
Cell Junction Maintenance (GO:0034331)		16	1	0.616718	1.62149	0.467023	1	57555	NLGN2
Synaptic Transmission, GABAergic (GO:0051932)		16	1	0.616718	1.62149	0.467023	1	2557	GABRA4
Epoxygenase P450 Pathway (GO:0019373)		16	1	0.616718	1.62149	0.467023	1	1545	CYP1B1
Establishment of Protein Localization to Peroxisome (GO:0072663)		16	1	0.616718	1.62149	0.467023	1	51762	RAB8B
Binding of Sperm to Zona Pellucida (GO:0007339)		16	1	0.616718	1.62149	0.467023	1	54760	PCSK4
Protein Localization to Endoplasmic Reticulum (GO:0070972)		17	1	0.655263	1.52611	0.487591	1	23645	PPP1R15A
Neural Tube Development (GO:0021915)		17	1	0.655263	1.52611	0.487591	1	51057	WDPCP
Response to Fibroblast Growth Factor (GO:0071774)		17	1	0.655263	1.52611	0.487591	1	1960	EGR3
Regulation of Hematopoietic Progenitor Cell Differentiation (GO:1901532)		17	1	0.655263	1.52611	0.487591	1	51441	YTHDF2
Positive Regulation of Translational Initiation (GO:0045948)		17	1	0.655263	1.52611	0.487591	1	51441	YTHDF2
Positive Regulation of Cytokine Production Involved in Inflammatory Response (GO:1900017)		17	1	0.655263	1.52611	0.487591	1	7099	TLR4
Extracellular Matrix Assembly (GO:0085029)		17	1	0.655263	1.52611	0.487591	1	3037	HAS2
Regulation of Nucleocytoplasmic Transport (GO:0046822)		17	1	0.655263	1.52611	0.487591	1	1029	CDKN2A
Negative Regulation of Cation Transmembrane Transport (GO:1904063)		17	1	0.655263	1.52611	0.487591	1	23630	KCNE5
Ventricular Cardiac Muscle Cell Action Potential (GO:0086005)		17	1	0.655263	1.52611	0.487591	1	23630	KCNE5
Negative Regulation of Receptor Signaling Pathway via JAK-STAT (GO:0046426)		17	1	0.655263	1.52611	0.487591	1	8835	SOCS2
Negative Regulation of Receptor Signaling Pathway via STAT (GO:1904893)		17	1	0.655263	1.52611	0.487591	1	8835	SOCS2
Nuclear Chromosome Segregation (GO:0098813)		17	1	0.655263	1.52611	0.487591	1	200942	KLHDC8B
Ionotropic Glutamate Receptor Signaling Pathway (GO:0035235)		17	1	0.655263	1.52611	0.487591	1	116443	GRIN3A
Epithelial Cell Migration (GO:0010631)		17	1	0.655263	1.52611	0.487591	1	3868	KRT16
Contractile Actin Filament Bundle Assembly (GO:0030038)		17	1	0.655263	1.52611	0.487591	1	8452	CUL3
Stress Fiber Assembly (GO:0043149)		17	1	0.655263	1.52611	0.487591	1	8452	CUL3
Positive Regulation of Cell Adhesion Mediated by Integrin (GO:0033630)		17	1	0.655263	1.52611	0.487591	1	6423	SFRP2
Regulation of Defense Response to Virus (GO:0050688)		17	1	0.655263	1.52611	0.487591	1	7128	TNFAIP3
Regulation of Dendrite Extension (GO:1903859)		17	1	0.655263	1.52611	0.487591	1	114804	RNF157
Positive Regulation of Cartilage Development (GO:0061036)		17	1	0.655263	1.52611	0.487591	1	392255	GDF6
Regulation of Insulin-Like Growth Factor Receptor Signaling Pathway (GO:0043567)		17	1	0.655263	1.52611	0.487591	1	8483	CILP
Positive Regulation of Embryonic Development (GO:0040019)		17	1	0.655263	1.52611	0.487591	1	84327	ZBED3
Regulation of Ubiquitin-Protein Transferase Activity (GO:0051438)		17	1	0.655263	1.52611	0.487591	1	1029	CDKN2A
Glycoprotein Catabolic Process (GO:0006516)		17	1	0.655263	1.52611	0.487591	1	4321	MMP12
Negative Regulation of Intracellular Protein Transport (GO:0090317)		17	1	0.655263	1.52611	0.487591	1	3638	INSIG1
Regulation of Ubiquitin Protein Ligase Activity (GO:1904666)		17	1	0.655263	1.52611	0.487591	1	1029	CDKN2A
Positive Regulation by Host of Viral Transcription (GO:0043923)		17	1	0.655263	1.52611	0.487591	1	3725	JUN
Embryo Development Ending in Birth or Egg Hatching (GO:0009792)		17	1	0.655263	1.52611	0.487591	1	55636	CHD7
Carbohydrate Derivative Transport (GO:1901264)		17	1	0.655263	1.52611	0.487591	1	84879	MFSD2A
Regulation of Protein Tyrosine Kinase Activity (GO:0061097)		17	1	0.655263	1.52611	0.487591	1	146433	IL34
Positive Regulation of Cell Activation (GO:0050867)		17	1	0.655263	1.52611	0.487591	1	7099	TLR4
Eye Photoreceptor Cell Development (GO:0042462)		17	1	0.655263	1.52611	0.487591	1	148398	SAMD11
Regulation of Endothelial Cell Chemotaxis (GO:2001026)		17	1	0.655263	1.52611	0.487591	1	2258	FGF13
Protein Localization to Synapse (GO:0035418)		17	1	0.655263	1.52611	0.487591	1	57555	NLGN2
Carboxylic Acid Biosynthetic Process (GO:0046394)		17	1	0.655263	1.52611	0.487591	1	587	BCAT2
acetyl-CoA Metabolic Process (GO:0006084)		17	1	0.655263	1.52611	0.487591	1	23181	DIP2A
Keratan Sulfate Proteoglycan Metabolic Process (GO:0042339)		17	1	0.655263	1.52611	0.487591	1	6487	ST3GAL3
Filopodium Assembly (GO:0046847)		17	1	0.655263	1.52611	0.487591	1	55785	FGD6
Synaptic Membrane Adhesion (GO:0099560)		17	1	0.655263	1.52611	0.487591	1	5802	PTPRS
Epithelial Cell Morphogenesis (GO:0003382)		17	1	0.655263	1.52611	0.487591	1	1003	CDH5
Long-Chain fatty-acyl-CoA Biosynthetic Process (GO:0035338)		17	1	0.655263	1.52611	0.487591	1	79993	ELOVL7
Peroxisomal Membrane Transport (GO:0015919)		17	1	0.655263	1.52611	0.487591	1	51762	RAB8B
Regulation of Microtubule Nucleation (GO:0010968)		18	1	0.693807	1.44132	0.507367	1	23354	HAUS5
Regulation of Epidermal Cell Differentiation (GO:0045604)		18	1	0.693807	1.44132	0.507367	1	6424	SFRP4
Regulation of Viral Transcription (GO:0046782)		18	1	0.693807	1.44132	0.507367	1	10410	IFITM3
Positive Regulation of Muscle Cell Differentiation (GO:0051149)		18	1	0.693807	1.44132	0.507367	1	3084	NRG1
Estrogen Receptor Signaling Pathway (GO:0030520)		18	1	0.693807	1.44132	0.507367	1	2099	ESR1
Regulation of Viral Entry Into Host Cell (GO:0046596)		18	1	0.693807	1.44132	0.507367	1	3123	HLA-DRB1
Positive Regulation of Sprouting Angiogenesis (GO:1903672)		18	1	0.693807	1.44132	0.507367	1	2258	FGF13
Nucleobase-Containing Small Molecule Metabolic Process (GO:0055086)		18	1	0.693807	1.44132	0.507367	1	57089	ENTPD7
Regulation of Tissue Remodeling (GO:0034103)		18	1	0.693807	1.44132	0.507367	1	861	RUNX1
Intracellular Monoatomic Ion Homeostasis (GO:0006873)		18	1	0.693807	1.44132	0.507367	1	6005	RHAG
Skeletal Muscle Contraction (GO:0003009)		18	1	0.693807	1.44132	0.507367	1	4621	MYH3
Dendritic Cell Migration (GO:0036336)		18	1	0.693807	1.44132	0.507367	1	1234	CCR5
Synaptic Transmission, Cholinergic (GO:0007271)		18	1	0.693807	1.44132	0.507367	1	1137	CHRNA4
Negative Regulation of Type I Interferon-Mediated Signaling Pathway (GO:0060339)		18	1	0.693807	1.44132	0.507367	1	51441	YTHDF2
Regulation of Vascular Endothelial Cell Proliferation (GO:1905562)		18	1	0.693807	1.44132	0.507367	1	2258	FGF13
Detection of Mechanical Stimulus Involved in Sensory Perception (GO:0050974)		18	1	0.693807	1.44132	0.507367	1	3776	KCNK2
Cell Projection Organization (GO:0030030)		18	1	0.693807	1.44132	0.507367	1	4744	NEFH
Mesoderm Formation (GO:0001707)		18	1	0.693807	1.44132	0.507367	1	3691	ITGB4
Regulation of Oxidoreductase Activity (GO:0051341)		18	1	0.693807	1.44132	0.507367	1	9722	NOS1AP
Host-Mediated Suppression of Symbiont Invasion (GO:0046597)		18	1	0.693807	1.44132	0.507367	1	10410	IFITM3
SMAD Protein Signal Transduction (GO:0060395)		18	1	0.693807	1.44132	0.507367	1	3725	JUN
Regulation of Activin Receptor Signaling Pathway (GO:0032925)		18	1	0.693807	1.44132	0.507367	1	6469	SHH
Regulation of Bicellular Tight Junction Assembly (GO:2000810)		18	1	0.693807	1.44132	0.507367	1	50848	F11R
Mesenchyme Development (GO:0060485)		18	1	0.693807	1.44132	0.507367	1	6423	SFRP2
Positive Regulation of Hormone Secretion (GO:0046887)		18	1	0.693807	1.44132	0.507367	1	286676	ILDR1
Alpha-Beta T Cell Activation (GO:0046631)		18	1	0.693807	1.44132	0.507367	1	51348	KLRF1
Positive Regulation of Monocyte Chemotaxis (GO:0090026)		18	1	0.693807	1.44132	0.507367	1	5054	SERPINE1
Positive Regulation of Osteoclast Differentiation (GO:0045672)		18	1	0.693807	1.44132	0.507367	1	1435	CSF1
Positive Regulation of Triglyceride Metabolic Process (GO:0090208)		18	1	0.693807	1.44132	0.507367	1	84879	MFSD2A
DNA Methylation-Dependent Constitutive Heterochromatin Formation (GO:0006346)		18	1	0.693807	1.44132	0.507367	1	3070	HELLS
Negative Regulation of Stem Cell Population Maintenance (GO:1902455)		18	1	0.693807	1.44132	0.507367	1	8819	SAP30
Positive Regulation of Smoothened Signaling Pathway (GO:0045880)		18	1	0.693807	1.44132	0.507367	1	6469	SHH
Regulation of Arp2/3 Complex-Mediated Actin Nucleation (GO:0034315)		18	1	0.693807	1.44132	0.507367	1	90668	CARMIL3
Peptide Antigen Assembly With MHC Protein Complex (GO:0002501)		18	1	0.693807	1.44132	0.507367	1	3123	HLA-DRB1
Activation of Adenylate Cyclase Activity (GO:0007190)		18	1	0.693807	1.44132	0.507367	1	57413	TMIGD3
Reg of Mt Outer Membrane Permeabilization Inv in Apoptotic Sgnlng Pway (GO:1901028)		19	1	0.732352	1.36546	0.526381	1	666	BOK
Glutamate Metabolic Process (GO:0006536)		19	1	0.732352	1.36546	0.526381	1	27165	GLS2
Histone mRNA Metabolic Process (GO:0008334)		19	1	0.732352	1.36546	0.526381	1	54512	EXOSC4
Regulation of Generation of Precursor Metabolites and Energy (GO:0043467)		19	1	0.732352	1.36546	0.526381	1	51422	PRKAG2
Negative Regulation of Endopeptidase Activity (GO:0010951)		19	1	0.732352	1.36546	0.526381	1	5054	SERPINE1
Regulation of Endopeptidase Activity (GO:0052548)		19	1	0.732352	1.36546	0.526381	1	5054	SERPINE1
Positive Regulation of Alcohol Biosynthetic Process (GO:1902932)		19	1	0.732352	1.36546	0.526381	1	5745	PTH1R
Positive Regulation of Endothelial Cell Apoptotic Process (GO:2000353)		19	1	0.732352	1.36546	0.526381	1	958	CD40
Anterior/Posterior Axis Specification (GO:0009948)		19	1	0.732352	1.36546	0.526381	1	6469	SHH
Regulation of Fibroblast Migration (GO:0010762)		19	1	0.732352	1.36546	0.526381	1	2258	FGF13
Import Into Cell (GO:0098657)		19	1	0.732352	1.36546	0.526381	1	6616	SNAP25
Positive Regulation of Signaling Receptor Activity (GO:2000273)		19	1	0.732352	1.36546	0.526381	1	26585	GREM1
Phosphatidylcholine Biosynthetic Process (GO:0006656)		19	1	0.732352	1.36546	0.526381	1	84879	MFSD2A
Antigen Processing and Presentation of Peptide Antigen via MHC Class I (GO:0002474)		19	1	0.732352	1.36546	0.526381	1	1636	ACE
Neutrophil Activation (GO:0042119)		19	1	0.732352	1.36546	0.526381	1	1511	CTSG
Vasculature Development (GO:0001944)		19	1	0.732352	1.36546	0.526381	1	5156	PDGFRA
Positive Regulation of Small Molecule Metabolic Process (GO:0062013)		19	1	0.732352	1.36546	0.526381	1	3667	IRS1
Chromosome Condensation (GO:0030261)		19	1	0.732352	1.36546	0.526381	1	26993	AKAP8L
Embryonic Digestive Tract Development (GO:0048566)		19	1	0.732352	1.36546	0.526381	1	5156	PDGFRA
Regulation of Nuclear Division (GO:0051783)		19	1	0.732352	1.36546	0.526381	1	286151	FBXO43
Sphingosine Metabolic Process (GO:0006670)		19	1	0.732352	1.36546	0.526381	1	130367	SGPP2
Transport Along Microtubule (GO:0010970)		19	1	0.732352	1.36546	0.526381	1	282991	BLOC1S2
piRNA Processing (GO:0034587)		19	1	0.732352	1.36546	0.526381	1	54456	MOV10L1
Presynaptic Endocytosis (GO:0140238)		19	1	0.732352	1.36546	0.526381	1	6804	STX1A
Detection of Mechanical Stimulus (GO:0050982)		19	1	0.732352	1.36546	0.526381	1	342372	PKD1L3
Phosphatidylethanolamine Metabolic Process (GO:0046337)		19	1	0.732352	1.36546	0.526381	1	26279	PLA2G2D
Xenobiotic Transport (GO:0042908)		19	1	0.732352	1.36546	0.526381	1	55244	SLC47A1
Ganglioside Metabolic Process (GO:0001573)		19	1	0.732352	1.36546	0.526381	1	8705	B3GALT4
mRNA Cis Splicing, via Spliceosome (GO:0045292)		19	1	0.732352	1.36546	0.526381	1	6428	SRSF3
Negative Regulation of Myeloid Cell Differentiation (GO:0045638)		20	1	0.770897	1.29719	0.544663	1	9079	LDB2
RNA-templated DNA Biosynthetic Process (GO:0006278)		20	1	0.770897	1.29719	0.544663	1	25885	POLR1A
Telomere Maintenance via Telomerase (GO:0007004)		20	1	0.770897	1.29719	0.544663	1	25885	POLR1A
Post-Transcriptional Gene Silencing (GO:0016441)		20	1	0.770897	1.29719	0.544663	1	54456	MOV10L1
Response to ATP (GO:0033198)		20	1	0.770897	1.29719	0.544663	1	4907	NT5E
Organelle Fission (GO:0048285)		20	1	0.770897	1.29719	0.544663	1	54332	GDAP1
Regulation of Collagen Biosynthetic Process (GO:0032965)		20	1	0.770897	1.29719	0.544663	1	861	RUNX1
Regulation of Fatty Acid Metabolic Process (GO:0019217)		20	1	0.770897	1.29719	0.544663	1	51422	PRKAG2
Negative Regulation of Cell Communication (GO:0010648)		20	1	0.770897	1.29719	0.544663	1	8835	SOCS2
Myoblast Differentiation (GO:0045445)		20	1	0.770897	1.29719	0.544663	1	3084	NRG1
Positive Regulation of Leukocyte Activation (GO:0002696)		20	1	0.770897	1.29719	0.544663	1	7099	TLR4
snRNA 3'-End Processing (GO:0034472)		20	1	0.770897	1.29719	0.544663	1	54512	EXOSC4
Atrioventricular Valve Morphogenesis (GO:0003181)		20	1	0.770897	1.29719	0.544663	1	10439	OLFM1
Heart Trabecula Morphogenesis (GO:0061384)		20	1	0.770897	1.29719	0.544663	1	3084	NRG1
Endocardial Cushion Morphogenesis (GO:0003203)		20	1	0.770897	1.29719	0.544663	1	140628	GATA5
Anaphase-Promoting Complex-Dependent Catabolic Process (GO:0031145)		20	1	0.770897	1.29719	0.544663	1	8452	CUL3
Renal Absorption (GO:0070293)		20	1	0.770897	1.29719	0.544663	1	3037	HAS2
Positive Regulation of G2/M Transition of Mitotic Cell Cycle (GO:0010971)		20	1	0.770897	1.29719	0.544663	1	51514	DTL
Positive Regulation of Monooxygenase Activity (GO:0032770)		20	1	0.770897	1.29719	0.544663	1	2099	ESR1
Positive Regulation of Lipid Catabolic Process (GO:0050996)		20	1	0.770897	1.29719	0.544663	1	3667	IRS1
Positive Regulation of RNA Metabolic Process (GO:0051254)		20	1	0.770897	1.29719	0.544663	1	1797	DXO
Entrainment of Circadian Clock by Photoperiod (GO:0043153)		20	1	0.770897	1.29719	0.544663	1	5187	PER1
Cellular Response to Estradiol Stimulus (GO:0071392)		20	1	0.770897	1.29719	0.544663	1	2099	ESR1
Negative Regulation of Cilium Assembly (GO:1902018)		20	1	0.770897	1.29719	0.544663	1	23329	TBC1D30
Positive Regulation of Blood Coagulation (GO:0030194)		20	1	0.770897	1.29719	0.544663	1	5054	SERPINE1
Acylglycerol Biosynthetic Process (GO:0046463)		20	1	0.770897	1.29719	0.544663	1	57678	GPAM
Phosphatidylserine Metabolic Process (GO:0006658)		20	1	0.770897	1.29719	0.544663	1	154141	MBOAT1
Chaperone-Mediated Protein Complex Assembly (GO:0051131)		21	1	0.809442	1.23542	0.56224	1	8624	PSMG1
NADP Metabolic Process (GO:0006739)		21	1	0.809442	1.23542	0.56224	1	57717	PCDHB16
Alpha-Amino Acid Catabolic Process (GO:1901606)		21	1	0.809442	1.23542	0.56224	1	55258	THNSL2
Regulation of Neural Precursor Cell Proliferation (GO:2000177)		21	1	0.809442	1.23542	0.56224	1	57540	DISP3
Negative Regulation of Leukocyte Activation (GO:0002695)		21	1	0.809442	1.23542	0.56224	1	284021	MILR1
Positive Regulation of Interferon-Alpha Production (GO:0032727)		21	1	0.809442	1.23542	0.56224	1	7099	TLR4
Positive Regulation of Extracellular Matrix Organization (GO:1903055)		21	1	0.809442	1.23542	0.56224	1	861	RUNX1
Regulation of Membrane Depolarization (GO:0003254)		21	1	0.809442	1.23542	0.56224	1	2702	GJA5
Postreplication Repair (GO:0006301)		21	1	0.809442	1.23542	0.56224	1	51514	DTL
Negative Regulation of Leukocyte Cell-Cell Adhesion (GO:1903038)		21	1	0.809442	1.23542	0.56224	1	1511	CTSG
Excitatory Postsynaptic Potential (GO:0060079)		21	1	0.809442	1.23542	0.56224	1	23542	MAPK8IP2
Cellular Response to Interferon-Beta (GO:0035458)		21	1	0.809442	1.23542	0.56224	1	815	CAMK2A
Fc-gamma Receptor Signaling Pathway Involved in Phagocytosis (GO:0038096)		21	1	0.809442	1.23542	0.56224	1	2268	FGR
Protein K48-linked Deubiquitination (GO:0071108)		21	1	0.809442	1.23542	0.56224	1	7128	TNFAIP3
Antigen Processing and Presentation of Endogenous Peptide Antigen (GO:0002483)		21	1	0.809442	1.23542	0.56224	1	3123	HLA-DRB1
Positive Regulation of BMP Signaling Pathway (GO:0030513)		21	1	0.809442	1.23542	0.56224	1	1003	CDH5
Pulmonary Valve Development (GO:0003177)		21	1	0.809442	1.23542	0.56224	1	6091	ROBO1
COPII Vesicle Coating (GO:0048208)		21	1	0.809442	1.23542	0.56224	1	8452	CUL3
Vesicle Targeting, Rough ER to cis-Golgi (GO:0048207)		21	1	0.809442	1.23542	0.56224	1	8452	CUL3
D-glucose Transmembrane Transport (GO:1904659)		21	1	0.809442	1.23542	0.56224	1	6518	SLC2A5
Hexose Transmembrane Transport (GO:0008645)		21	1	0.809442	1.23542	0.56224	1	6518	SLC2A5
Negative Regulation of Oxidative Stress-Induced Intrinsic Apoptotic Signaling Pathway (GO:1902176)		21	1	0.809442	1.23542	0.56224	1	468	ATF4
Photoperiodism (GO:0009648)		21	1	0.809442	1.23542	0.56224	1	5187	PER1
Positive Regulation of Vacuole Organization (GO:0044090)		21	1	0.809442	1.23542	0.56224	1	90678	LRSAM1
Mammary Gland Development (GO:0030879)		21	1	0.809442	1.23542	0.56224	1	3084	NRG1
N-glycan Processing (GO:0006491)		21	1	0.809442	1.23542	0.56224	1	4122	MAN2A2
Positive Regulation of Synaptic Transmission, Glutamatergic (GO:0051968)		21	1	0.809442	1.23542	0.56224	1	57555	NLGN2
Male Gamete Generation (GO:0048232)		22	1	0.847987	1.17926	0.57914	1	56603	CYP26B1
Positive Regulation of p38MAPK Cascade (GO:1900745)		22	1	0.847987	1.17926	0.57914	1	392255	GDF6
Regulation of Myotube Differentiation (GO:0010830)		22	1	0.847987	1.17926	0.57914	1	168620	BHLHA15
Regulation of Cholesterol Biosynthetic Process (GO:0045540)		22	1	0.847987	1.17926	0.57914	1	3638	INSIG1
Regulation of Interleukin-4 Production (GO:0032673)		22	1	0.847987	1.17926	0.57914	1	3123	HLA-DRB1
Positive Regulation of Heart Contraction (GO:0045823)		22	1	0.847987	1.17926	0.57914	1	5997	RGS2
Regulation of Calcium Ion Import (GO:0090279)		22	1	0.847987	1.17926	0.57914	1	5155	PDGFB
Cellular Response to Acetylcholine (GO:1905145)		22	1	0.847987	1.17926	0.57914	1	1137	CHRNA4
Negative Regulation of T Cell Receptor Signaling Pathway (GO:0050860)		22	1	0.847987	1.17926	0.57914	1	29085	PHPT1
Protein K63-linked Deubiquitination (GO:0070536)		22	1	0.847987	1.17926	0.57914	1	7128	TNFAIP3
Negative Regulation of Neuron Differentiation (GO:0045665)		22	1	0.847987	1.17926	0.57914	1	57540	DISP3
Regulation of Steroid Metabolic Process (GO:0019218)		22	1	0.847987	1.17926	0.57914	1	283316	CD163L1
Androgen Metabolic Process (GO:0008209)		22	1	0.847987	1.17926	0.57914	1	6469	SHH
Retinol Metabolic Process (GO:0042572)		22	1	0.847987	1.17926	0.57914	1	1545	CYP1B1
Mitotic Cell Cycle Checkpoint Signaling (GO:0007093)		22	1	0.847987	1.17926	0.57914	1	1111	CHEK1
Mitochondrial RNA Metabolic Process (GO:0000959)		22	1	0.847987	1.17926	0.57914	1	51001	MTERF3
Meiosis I (GO:0007127)		22	1	0.847987	1.17926	0.57914	1	54456	MOV10L1
Eye Morphogenesis (GO:0048592)		22	1	0.847987	1.17926	0.57914	1	1290	COL5A2
Positive Regulation of Neural Precursor Cell Proliferation (GO:2000179)		22	1	0.847987	1.17926	0.57914	1	57540	DISP3
Xenobiotic Catabolic Process (GO:0042178)		22	1	0.847987	1.17926	0.57914	1	2947	GSTM3
Positive Regulation of Adenylate Cyclase Activity (GO:0045762)		22	1	0.847987	1.17926	0.57914	1	57413	TMIGD3
Regulatory ncRNA-mediated Post-Transcriptional Gene Silencing (GO:0035194)		23	1	0.886532	1.12799	0.595389	1	54456	MOV10L1
Negative Regulation of Interleukin-1 Beta Production (GO:0032691)		23	1	0.886532	1.12799	0.595389	1	7128	TNFAIP3
Positive Regulation of Striated Muscle Cell Differentiation (GO:0051155)		23	1	0.886532	1.12799	0.595389	1	3084	NRG1
Negative Regulation of Hippo Signaling (GO:0035331)		23	1	0.886532	1.12799	0.595389	1	23286	WWC1
Positive Regulation of NLRP3 Inflammasome Complex Assembly (GO:1900227)		23	1	0.886532	1.12799	0.595389	1	7099	TLR4
Positive Regulation of Viral Life Cycle (GO:1903902)		23	1	0.886532	1.12799	0.595389	1	3123	HLA-DRB1
U2-type Prespliceosome Assembly (GO:1903241)		23	1	0.886532	1.12799	0.595389	1	79753	SNIP1
Negative Regulation of Peptidase Activity (GO:0010466)		23	1	0.886532	1.12799	0.595389	1	5054	SERPINE1
Purine Ribonucleotide Transport (GO:0015868)		23	1	0.886532	1.12799	0.595389	1	347734	SLC35B2
Sodium Ion Import Across Plasma Membrane (GO:0098719)		23	1	0.886532	1.12799	0.595389	1	6337	SCNN1A
Positive Regulation of Lamellipodium Assembly (GO:0010592)		23	1	0.886532	1.12799	0.595389	1	5295	PIK3R1
Regulation of Heterotypic Cell-Cell Adhesion (GO:0034114)		23	1	0.886532	1.12799	0.595389	1	2651	GCNT2
Positive Regulation of Cell-Substrate Junction Organization (GO:0150117)		23	1	0.886532	1.12799	0.595389	1	5295	PIK3R1
Phosphatidylinositol-Mediated Signaling (GO:0048015)		23	1	0.886532	1.12799	0.595389	1	5334	PLCL1
Fc Receptor Mediated Stimulatory Signaling Pathway (GO:0002431)		23	1	0.886532	1.12799	0.595389	1	2268	FGR
Activin Receptor Signaling Pathway (GO:0032924)		23	1	0.886532	1.12799	0.595389	1	392255	GDF6
Long-Chain Fatty Acid Transport (GO:0015909)		23	1	0.886532	1.12799	0.595389	1	84879	MFSD2A
Placenta Development (GO:0001890)		23	1	0.886532	1.12799	0.595389	1	5155	PDGFB
Positive Regulation of Cell Cycle G2/M Phase Transition (GO:1902751)		23	1	0.886532	1.12799	0.595389	1	51514	DTL
Positive Regulation of Phosphate Metabolic Process (GO:0045937)		23	1	0.886532	1.12799	0.595389	1	5745	PTH1R
cAMP-mediated Signaling (GO:0019933)		23	1	0.886532	1.12799	0.595389	1	5136	PDE1A
Regulation of Protein Processing (GO:0070613)		23	1	0.886532	1.12799	0.595389	1	861	RUNX1
Protein Localization to Cell Surface (GO:0034394)		23	1	0.886532	1.12799	0.595389	1	7414	VCL
Positive Regulation of Excitatory Postsynaptic Potential (GO:2000463)		23	1	0.886532	1.12799	0.595389	1	57555	NLGN2
Mitotic Cytokinetic Process (GO:1902410)		23	1	0.886532	1.12799	0.595389	1	200942	KLHDC8B
Glial Cell Development (GO:0021782)		23	1	0.886532	1.12799	0.595389	1	745	MYRF
Platelet Dense Granule Organization (GO:0060155)		23	1	0.886532	1.12799	0.595389	1	282991	BLOC1S2
Cholesterol Efflux (GO:0033344)		23	1	0.886532	1.12799	0.595389	1	341	APOC1
Long-Chain fatty-acyl-CoA Metabolic Process (GO:0035336)		23	1	0.886532	1.12799	0.595389	1	79993	ELOVL7
Reg of Endoplasmic Reticulum Stress-Induced Intrinsic Apoptotic Sgnlng Pway (GO:1902235)		24	1	0.925077	1.08099	0.611011	1	666	BOK
Regulation of Lipid Storage (GO:0010883)		24	1	0.925077	1.08099	0.611011	1	4023	LPL
Osteoclast Differentiation (GO:0030316)		24	1	0.925077	1.08099	0.611011	1	1435	CSF1
Positive Regulation of Inflammasome-Mediated Signaling Pathway (GO:0141087)		24	1	0.925077	1.08099	0.611011	1	7099	TLR4
Regulation of T Cell Migration (GO:2000404)		24	1	0.925077	1.08099	0.611011	1	969	CD69
Adenine Nucleotide Transport (GO:0051503)		24	1	0.925077	1.08099	0.611011	1	347734	SLC35B2
Protein Export From Nucleus (GO:0006611)		24	1	0.925077	1.08099	0.611011	1	64901	RANBP17
Cardiac Muscle Cell Development (GO:0055013)		24	1	0.925077	1.08099	0.611011	1	5156	PDGFRA
Lamellipodium Assembly (GO:0030032)		24	1	0.925077	1.08099	0.611011	1	7414	VCL
Mismatch Repair (GO:0006298)		24	1	0.925077	1.08099	0.611011	1	25885	POLR1A
Negative Regulation of Intrinsic Apoptotic Signaling Pathway in Response to DNA Damage (GO:1902230)		24	1	0.925077	1.08099	0.611011	1	6423	SFRP2
Regulation of Vascular Endothelial Growth Factor Signaling Pathway (GO:1900746)		24	1	0.925077	1.08099	0.611011	1	6091	ROBO1
Apoptotic Cell Clearance (GO:0043277)		24	1	0.925077	1.08099	0.611011	1	114786	XKR4
Regulation of Protein Export From Nucleus (GO:0046825)		24	1	0.925077	1.08099	0.611011	1	1029	CDKN2A
Regulation of Cell Size (GO:0008361)		24	1	0.925077	1.08099	0.611011	1	23108	RAP1GAP2
Outflow Tract Septum Morphogenesis (GO:0003148)		24	1	0.925077	1.08099	0.611011	1	6091	ROBO1
Regulation of Cholesterol Transport (GO:0032374)		24	1	0.925077	1.08099	0.611011	1	341	APOC1
Regulation of Cellular Response to Growth Factor Stimulus (GO:0090287)		24	1	0.925077	1.08099	0.611011	1	6424	SFRP4
Negative Regulation of Receptor-Mediated Endocytosis (GO:0048261)		24	1	0.925077	1.08099	0.611011	1	341	APOC1
Regulation of Ruffle Assembly (GO:1900027)		24	1	0.925077	1.08099	0.611011	1	4070	TACSTD2
Aminoglycan Biosynthetic Process (GO:0006023)		24	1	0.925077	1.08099	0.611011	1	2651	GCNT2
Determination of Bilateral Symmetry (GO:0009855)		24	1	0.925077	1.08099	0.611011	1	27031	NPHP3
Axonemal Dynein Complex Assembly (GO:0070286)		24	1	0.925077	1.08099	0.611011	1	8632	DNAH17
Carboxylic Acid Catabolic Process (GO:0046395)		25	1	0.963621	1.03775	0.626032	1	5446	PON3
Regulation of Keratinocyte Differentiation (GO:0045616)		25	1	0.963621	1.03775	0.626032	1	2118	ETV4
Amyloid Fibril Formation (GO:1990000)		25	1	0.963621	1.03775	0.626032	1	1029	CDKN2A
Regulation of Neutrophil Chemotaxis (GO:0090022)		25	1	0.963621	1.03775	0.626032	1	1803	DPP4
Regulation of Glycogen Biosynthetic Process (GO:0005979)		25	1	0.963621	1.03775	0.626032	1	3667	IRS1
NADH Metabolic Process (GO:0006734)		25	1	0.963621	1.03775	0.626032	1	57717	PCDHB16
Gluconeogenesis (GO:0006094)		25	1	0.963621	1.03775	0.626032	1	5105	PCK1
Protein Localization to Chromatin (GO:0071168)		25	1	0.963621	1.03775	0.626032	1	2099	ESR1
Regulation of Cardiac Muscle Hypertrophy (GO:0010611)		25	1	0.963621	1.03775	0.626032	1	5997	RGS2
Sensory Perception of Chemical Stimulus (GO:0007606)		25	1	0.963621	1.03775	0.626032	1	341359	SYT10
Regulation of Cytokine Production Involved in Immune Response (GO:0002718)		25	1	0.963621	1.03775	0.626032	1	11187	PKP3
Positive Regulation of Filopodium Assembly (GO:0051491)		25	1	0.963621	1.03775	0.626032	1	5295	PIK3R1
Cytoplasmic Pattern Recognition Receptor Signaling Pathway (GO:0002753)		25	1	0.963621	1.03775	0.626032	1	7128	TNFAIP3
Antigen Processing and Presentation of Exogenous Peptide Antigen via MHC Class II (GO:0019886)		25	1	0.963621	1.03775	0.626032	1	3123	HLA-DRB1
Antigen Processing and Presentation of Peptide Antigen via MHC Class II (GO:0002495)		25	1	0.963621	1.03775	0.626032	1	3123	HLA-DRB1
Cell Surface Receptor Protein Serine/Threonine Kinase Signaling Pathway (GO:0007178)		25	1	0.963621	1.03775	0.626032	1	3725	JUN
Negative Regulation of Lipid Biosynthetic Process (GO:0051055)		25	1	0.963621	1.03775	0.626032	1	341	APOC1
Vesicle Cytoskeletal Trafficking (GO:0099518)		25	1	0.963621	1.03775	0.626032	1	146439	BICDL2
Microtubule Nucleation (GO:0007020)		25	1	0.963621	1.03775	0.626032	1	282991	BLOC1S2
Acylglycerol Homeostasis (GO:0055090)		25	1	0.963621	1.03775	0.626032	1	4023	LPL
DNA Synthesis Involved in DNA Repair (GO:0000731)		25	1	0.963621	1.03775	0.626032	1	51514	DTL
Protein Acetylation (GO:0006473)		25	1	0.963621	1.03775	0.626032	1	2308	FOXO1
Regulation of Proteolysis Involved in Protein Catabolic Process (GO:1903050)		25	1	0.963621	1.03775	0.626032	1	1029	CDKN2A
Protein Depolymerization (GO:0051261)		25	1	0.963621	1.03775	0.626032	1	3925	STMN1
fatty-acyl-CoA Biosynthetic Process (GO:0046949)		25	1	0.963621	1.03775	0.626032	1	79993	ELOVL7
Retinoic Acid Metabolic Process (GO:0042573)		25	1	0.963621	1.03775	0.626032	1	56603	CYP26B1
Sperm-Egg Recognition (GO:0035036)		25	1	0.963621	1.03775	0.626032	1	54760	PCSK4
Telomere Maintenance via Telomere Lengthening (GO:0010833)		26	1	1.00217	0.997838	0.640473	1	25885	POLR1A
Cellular Response to Epidermal Growth Factor Stimulus (GO:0071364)		26	1	1.00217	0.997838	0.640473	1	8826	IQGAP1
ADP Catabolic Process (GO:0046032)		26	1	1.00217	0.997838	0.640473	1	80201	HKDC1
Glycolytic Process (GO:0006096)		26	1	1.00217	0.997838	0.640473	1	80201	HKDC1
Zymogen Activation (GO:0031638)		26	1	1.00217	0.997838	0.640473	1	3818	KLKB1
Negative Regulation of Signaling (GO:0023057)		26	1	1.00217	0.997838	0.640473	1	8835	SOCS2
Intracellular Zinc Ion Homeostasis (GO:0006882)		26	1	1.00217	0.997838	0.640473	1	4496	MT1H
Cellular Response to Xenobiotic Stimulus (GO:0071466)		26	1	1.00217	0.997838	0.640473	1	22843	PPM1E
Regulation of Vascular Endothelial Growth Factor Receptor Signaling Pathway (GO:0030947)		26	1	1.00217	0.997838	0.640473	1	6091	ROBO1
Dendritic Spine Organization (GO:0097061)		26	1	1.00217	0.997838	0.640473	1	23181	DIP2A
Regulation of Transmembrane Receptor Protein Serine/Threonine Kinase Signaling Pathway (GO:0090092)		26	1	1.00217	0.997838	0.640473	1	6424	SFRP4
Protein Quality Control for Misfolded or Incompletely Synthesized Proteins (GO:0006515)		26	1	1.00217	0.997838	0.640473	1	8452	CUL3
Membrane Fusion (GO:0061025)		26	1	1.00217	0.997838	0.640473	1	1803	DPP4
Negative Regulation of Fatty Acid Metabolic Process (GO:0045922)		26	1	1.00217	0.997838	0.640473	1	341	APOC1
Regulation of Fatty Acid Biosynthetic Process (GO:0042304)		26	1	1.00217	0.997838	0.640473	1	341	APOC1
Regulation of Lipid Catabolic Process (GO:0050994)		26	1	1.00217	0.997838	0.640473	1	341	APOC1
Negative Regulation of Interleukin-1 Production (GO:0032692)		27	1	1.04071	0.960881	0.654358	1	7128	TNFAIP3
Negative Regulation of Neurogenesis (GO:0050768)		27	1	1.04071	0.960881	0.654358	1	4168	MCF2
Cellular Catabolic Process (GO:0044248)		27	1	1.04071	0.960881	0.654358	1	1636	ACE
Positive Regulation of Vascular Endothelial Growth Factor Production (GO:0010575)		27	1	1.04071	0.960881	0.654358	1	1545	CYP1B1
Regulation of Monoatomic Ion Transport (GO:0043269)		27	1	1.04071	0.960881	0.654358	1	3773	KCNJ16
Striated Muscle Cell Development (GO:0055002)		27	1	1.04071	0.960881	0.654358	1	29765	TMOD4
Regulation of Striated Muscle Contraction (GO:0006942)		27	1	1.04071	0.960881	0.654358	1	2702	GJA5
Phagocytosis, Engulfment (GO:0006911)		27	1	1.04071	0.960881	0.654358	1	114786	XKR4
Ventricular Septum Morphogenesis (GO:0060412)		27	1	1.04071	0.960881	0.654358	1	6091	ROBO1
Positive Regulation of Mitotic Cell Cycle (GO:0045931)		27	1	1.04071	0.960881	0.654358	1	8452	CUL3
Regulation of Protein Localization to Cell Periphery (GO:1904375)		27	1	1.04071	0.960881	0.654358	1	815	CAMK2A
Regulation of Myelination (GO:0031641)		27	1	1.04071	0.960881	0.654358	1	745	MYRF
Positive Regulation of Cation Channel Activity (GO:2001259)		27	1	1.04071	0.960881	0.654358	1	2258	FGF13
Glycosaminoglycan Metabolic Process (GO:0030203)		27	1	1.04071	0.960881	0.654358	1	2651	GCNT2
Regulation of Supramolecular Fiber Organization (GO:1902903)		28	1	1.07926	0.926564	0.667708	1	4131	MAP1B
Synaptic Vesicle Endocytosis (GO:0048488)		28	1	1.07926	0.926564	0.667708	1	6804	STX1A
Negative Regulation of Response to Endoplasmic Reticulum Stress (GO:1903573)		28	1	1.07926	0.926564	0.667708	1	7466	WFS1
Toll-Like Receptor 4 Signaling Pathway (GO:0034142)		28	1	1.07926	0.926564	0.667708	1	7099	TLR4
Detection of Chemical Stimulus Involved in Sensory Perception of Taste (GO:0050912)		28	1	1.07926	0.926564	0.667708	1	342372	PKD1L3
Cellular Response to Acid Chemical (GO:0071229)		28	1	1.07926	0.926564	0.667708	1	8452	CUL3
Response to Amino Acid (GO:0043200)		28	1	1.07926	0.926564	0.667708	1	8452	CUL3
Regulation of Vascular Endothelial Growth Factor Production (GO:0010574)		28	1	1.07926	0.926564	0.667708	1	1545	CYP1B1
Regulation of Monoatomic Ion Transmembrane Transport (GO:0034765)		28	1	1.07926	0.926564	0.667708	1	3773	KCNJ16
Regulation of Transmembrane Transport (GO:0034762)		28	1	1.07926	0.926564	0.667708	1	3773	KCNJ16
Regulation of Calcium Ion Transmembrane Transport (GO:1903169)		28	1	1.07926	0.926564	0.667708	1	9722	NOS1AP
Amino Acid Import Across Plasma Membrane (GO:0089718)		28	1	1.07926	0.926564	0.667708	1	55244	SLC47A1
Positive Regulation of Viral Genome Replication (GO:0045070)		28	1	1.07926	0.926564	0.667708	1	940	CD28
Positive Regulation of Cholesterol Transport (GO:0032376)		28	1	1.07926	0.926564	0.667708	1	154664	ABCA13
Regulation of Long-Term Synaptic Potentiation (GO:1900271)		28	1	1.07926	0.926564	0.667708	1	8878	SQSTM1
Fc-gamma Receptor Signaling Pathway (GO:0038094)		28	1	1.07926	0.926564	0.667708	1	2268	FGR
Establishment of Endothelial Barrier (GO:0061028)		28	1	1.07926	0.926564	0.667708	1	50848	F11R
Camera-Type Eye Development (GO:0043010)		28	1	1.07926	0.926564	0.667708	1	1545	CYP1B1
Positive Regulation of Protein Targeting to Mitochondrion (GO:1903955)		29	1	1.1178	0.894614	0.680543	1	79778	MICALL2
Axoneme Assembly (GO:0035082)		29	1	1.1178	0.894614	0.680543	1	54768	HYDIN
Response to Epidermal Growth Factor (GO:0070849)		29	1	1.1178	0.894614	0.680543	1	8826	IQGAP1
Positive Regulation of Protein Import Into Nucleus (GO:0042307)		29	1	1.1178	0.894614	0.680543	1	5295	PIK3R1
Regulation of Macrophage Activation (GO:0043030)		29	1	1.1178	0.894614	0.680543	1	7099	TLR4
Positive Regulation of Catalytic Activity (GO:0043085)		29	1	1.1178	0.894614	0.680543	1	2264	FGFR4
Vascular Endothelial Growth Factor Receptor Signaling Pathway (GO:0048010)		29	1	1.1178	0.894614	0.680543	1	5228	PGF
Regulation of Dendrite Morphogenesis (GO:0048814)		29	1	1.1178	0.894614	0.680543	1	23072	HECW1
Positive Regulation of Calcium-Mediated Signaling (GO:0050850)		29	1	1.1178	0.894614	0.680543	1	5156	PDGFRA
Regulation of Blood Coagulation (GO:0030193)		29	1	1.1178	0.894614	0.680543	1	5054	SERPINE1
Regulation of Plasma Membrane Bounded Cell Projection Organization (GO:0120035)		29	1	1.1178	0.894614	0.680543	1	154141	MBOAT1
Left/Right Pattern Formation (GO:0060972)		29	1	1.1178	0.894614	0.680543	1	27031	NPHP3
Negative Regulation of G2/M Transition of Mitotic Cell Cycle (GO:0010972)		29	1	1.1178	0.894614	0.680543	1	1111	CHEK1
Vacuolar Acidification (GO:0007035)		29	1	1.1178	0.894614	0.680543	1	525	ATP6V1B1
Protein Localization to Cell Junction (GO:1902414)		29	1	1.1178	0.894614	0.680543	1	57555	NLGN2
Positive Regulation of RNA Splicing (GO:0033120)		30	1	1.15635	0.864793	0.692883	1	5295	PIK3R1
Cell Surface Toll-Like Receptor Signaling Pathway (GO:0140895)		30	1	1.15635	0.864793	0.692883	1	7099	TLR4
Type I Interferon-Mediated Signaling Pathway (GO:0060337)		30	1	1.15635	0.864793	0.692883	1	10410	IFITM3
Estrogen Metabolic Process (GO:0008210)		30	1	1.15635	0.864793	0.692883	1	1545	CYP1B1
Pyridine Nucleotide Catabolic Process (GO:0019364)		30	1	1.15635	0.864793	0.692883	1	80201	HKDC1
Regulation of Vasoconstriction (GO:0019229)		30	1	1.15635	0.864793	0.692883	1	27345	KCNMB4
Positive Regulation of Lamellipodium Organization (GO:1902745)		30	1	1.15635	0.864793	0.692883	1	5295	PIK3R1
Negative Regulation of Antigen Receptor-Mediated Signaling Pathway (GO:0050858)		30	1	1.15635	0.864793	0.692883	1	29085	PHPT1
L-amino Acid Transport (GO:0015807)		30	1	1.15635	0.864793	0.692883	1	55244	SLC47A1
Negative Regulation of MAP Kinase Activity (GO:0043407)		30	1	1.15635	0.864793	0.692883	1	5997	RGS2
Negative Regulation of Intracellular Steroid Hormone Receptor Signaling Pathway (GO:0033144)		30	1	1.15635	0.864793	0.692883	1	5187	PER1
Regulation of Bone Resorption (GO:0045124)		30	1	1.15635	0.864793	0.692883	1	7128	TNFAIP3
Vesicle Coating (GO:0006901)		30	1	1.15635	0.864793	0.692883	1	8452	CUL3
Regulation of Transcription by RNA Polymerase I (GO:0006356)		30	1	1.15635	0.864793	0.692883	1	468	ATF4
Regulation of Neuron Migration (GO:2001222)		30	1	1.15635	0.864793	0.692883	1	815	CAMK2A
Collagen Catabolic Process (GO:0030574)		30	1	1.15635	0.864793	0.692883	1	4321	MMP12
Very Long-Chain Fatty Acid Metabolic Process (GO:0000038)		30	1	1.15635	0.864793	0.692883	1	79993	ELOVL7
acyl-CoA Metabolic Process (GO:0006637)		31	1	1.19489	0.836897	0.704747	1	4967	OGDH
DNA Damage Response, Signal Transduction by P53 Class Mediator (GO:0030330)		31	1	1.19489	0.836897	0.704747	1	51065	RPS27L
Positive Regulation of Interleukin-12 Production (GO:0032735)		31	1	1.19489	0.836897	0.704747	1	7099	TLR4
Cellular Response to Type I Interferon (GO:0071357)		31	1	1.19489	0.836897	0.704747	1	10410	IFITM3
Negative Regulation of Insulin Receptor Signaling Pathway (GO:0046627)		31	1	1.19489	0.836897	0.704747	1	3667	IRS1
B Cell Receptor Signaling Pathway (GO:0050853)		31	1	1.19489	0.836897	0.704747	1	973	CD79A
Natural Killer Cell Mediated Cytotoxicity (GO:0042267)		31	1	1.19489	0.836897	0.704747	1	5295	PIK3R1
Natural Killer Cell Mediated Immunity (GO:0002228)		31	1	1.19489	0.836897	0.704747	1	5295	PIK3R1
Regulation of Cell Migration Involved in Sprouting Angiogenesis (GO:0090049)		31	1	1.19489	0.836897	0.704747	1	2258	FGF13
Antigen Processing and Presentation of Exogenous Peptide Antigen (GO:0002478)		31	1	1.19489	0.836897	0.704747	1	3123	HLA-DRB1
Regulation of DNA Damage Response, Signal Transduction by P53 Class Mediator (GO:0043516)		31	1	1.19489	0.836897	0.704747	1	1029	CDKN2A
Positive Regulation of T Cell Mediated Cytotoxicity (GO:0001916)		31	1	1.19489	0.836897	0.704747	1	3123	HLA-DRB1
Negative Regulation of Proteasomal Ubiquitin-Dependent Protein Catabolic Process (GO:0032435)		31	1	1.19489	0.836897	0.704747	1	6815	STYX
Transition Metal Ion Transport (GO:0000041)		31	1	1.19489	0.836897	0.704747	1	9914	ATP2C2
TOR Signaling (GO:0031929)		31	1	1.19489	0.836897	0.704747	1	261726	TIPRL
Lipid Droplet Organization (GO:0034389)		31	1	1.19489	0.836897	0.704747	1	123	PLIN2
Sphingolipid Catabolic Process (GO:0030149)		31	1	1.19489	0.836897	0.704747	1	130367	SGPP2
Sensory Perception of Smell (GO:0007608)		31	1	1.19489	0.836897	0.704747	1	341359	SYT10
Intracellular pH Reduction (GO:0051452)		31	1	1.19489	0.836897	0.704747	1	525	ATP6V1B1
Positive Regulation of Establishment of Protein Localization to Mitochondrion (GO:1903749)		32	1	1.23344	0.810744	0.716154	1	79778	MICALL2
Regulation of Interleukin-17 Production (GO:0032660)		32	1	1.23344	0.810744	0.716154	1	7099	TLR4
[truncated: 247 more rows]
