# Supplementary material for: REVIVE: a computational platform for systematically identifying rejuvenating chemical and genetic perturbations
Source: Aging (Albany NY). 2025 Nov 25;17(11):2844–58. doi: 10.18632/aging.206342 (PMC12705183; doi:10.18632/aging.206342)
Supplement: Supplementary Table 4 [file aging-17-11-206342-s005.xlsx]

## Sheet: Sheet1
Supplementary Table 4. Sample information and predicted age differences in 80 datasets with biological interventions with known pro- or anti-aging effects.
Data_Accession	Condition	Info	Effect	Experimental_GSMs	Control_GSMs	ExpMean	ConMean	Direction correct
GSE222400	Sen	replicative	pro-aging	GSM6922824;GSM6922825	GSM6922822;GSM6922823	79.4189	49.1054	Yes
GSE222400	Sen SDS (plasma membrane damage)	1d	pro-aging	GSM6922828;GSM6922829	GSM6922822;GSM6922823	59.46	49.1054	Yes
GSE222400	Sen SDS (plasma membrane damage)	2d	pro-aging	GSM6922830;GSM6922831	GSM6922822;GSM6922823	57.6086	49.1054	Yes
GSE222400	Sen SDS (plasma membrane damage)	3d	pro-aging	GSM6922832;GSM6922833	GSM6922822;GSM6922823	56.3768	49.1054	Yes
GSE222400	Sen SDS (plasma membrane damage)	4d	pro-aging	GSM6922834;GSM6922835	GSM6922822;GSM6922823	55.3013	49.1054	Yes
GSE222400	Sen SDS (plasma membrane damage)	6d	pro-aging	GSM6922836;GSM6922837	GSM6922822;GSM6922823	56.0294	49.1054	Yes
GSE222400	Sen SDS (plasma membrane damage)	8d	pro-aging	GSM6922838;GSM6922839	GSM6922822;GSM6922823	55.3087	49.1054	Yes
GSE222400	Sen SDS (plasma membrane damage)	16d	pro-aging	GSM6922840;GSM6922841	GSM6922822;GSM6922823	67.0041	49.1054	Yes
GSE222400	Sen KCL (calcium influx)	1d	pro-aging	GSM6922844;GSM6922845	GSM6922822;GSM6922823	41.9494	49.1054	Yes
GSE222400	Sen KCL (calcium influx)	2d	pro-aging	GSM6922846;GSM6922847	GSM6922822;GSM6922823	50.1745	49.1054	Yes
GSE222400	Sen KCL (calcium influx)	3d	pro-aging	GSM6922848;GSM6922849	GSM6922822;GSM6922823	57.4696	49.1054	Yes
GSE222400	Sen KCL (calcium influx)	4d	pro-aging	GSM6922850;GSM6922851	GSM6922822;GSM6922823	50.287	49.1054	Yes
GSE222400	Sen KCL (calcium influx)	6d	pro-aging	GSM6922852;GSM6922853	GSM6922822;GSM6922823	61.627	49.1054	Yes
GSE222400	Sen KCL (calcium influx)	8d	pro-aging	GSM6922854;GSM6922855	GSM6922822;GSM6922823	55.3266	49.1054	Yes
GSE222400	Sen KCL (calcium influx)	16d	pro-aging	GSM6922856;GSM6922857	GSM6922822;GSM6922823	58.1188	49.1054	Yes
GSE222400	Sen KCL (calcium influx)	0d	pro-aging	GSM6922858;GSM6922859	GSM6922822;GSM6922823	42.2649	49.1054	Yes
GSE222400	Sen DXR (DNA damage)	1d	pro-aging	GSM6922860;GSM6922861	GSM6922822;GSM6922823	51.9079	49.1054	Yes
GSE222400	Sen DXR (DNA damage)	2d	pro-aging	GSM6922862;GSM6922863	GSM6922822;GSM6922823	55.8401	49.1054	Yes
GSE222400	Sen DXR (DNA damage)	3d	pro-aging	GSM6922864;GSM6922865	GSM6922822;GSM6922823	50.937	49.1054	Yes
GSE222400	Sen DXR (DNA damage)	4d	pro-aging	GSM6922866;GSM6922867	GSM6922822;GSM6922823	57.556	49.1054	Yes
GSE222400	Sen DXR (DNA damage)	6d	pro-aging	GSM6922868;GSM6922869	GSM6922822;GSM6922823	53.3519	49.1054	Yes
GSE222400	Sen DXR (DNA damage)	8d	pro-aging	GSM6922870;GSM6922871	GSM6922822;GSM6922823	62.3903	49.1054	Yes
GSE222400	Sen DXR (DNA damage)	16d	pro-aging	GSM6922872;GSM6922873	GSM6922822;GSM6922823	61.2113	49.1054	Yes
GSE137317	Met 10h	10h	rejuvenation	GSM4075266;GSM4075269;GSM4075272;GSM4075275;GSM4075278;GSM4075281;GSM4075284;GSM4075287;GSM4075290;GSM4075293;GSM4075296;GSM4075299;GSM4075302;GSM4075305;GSM4075308;GSM4075310;GSM4075313;GSM4075316;GSM4075319;GSM4075322;GSM4075325;GSM4075328;GSM4075331;GSM4075334;GSM4075337	GSM4075265;GSM4075268;GSM4075271;GSM4075274;GSM4075277;GSM4075280;GSM4075283;GSM4075286;GSM4075289;GSM4075292;GSM4075295;GSM4075298;GSM4075301;GSM4075304;GSM4075307;GSM4075309;GSM4075312;GSM4075315;GSM4075318;GSM4075321;GSM4075324;GSM4075327;GSM4075330;GSM4075333;GSM4075336	36.4798	37.7176	Yes
GSE137317	Met 7d	7d	rejuvenation	GSM4075267;GSM4075270;GSM4075273;GSM4075276;GSM4075279;GSM4075282;GSM4075285;GSM4075288;GSM4075291;GSM4075294;GSM4075297;GSM4075300;GSM4075303;GSM4075306;GSM4075311;GSM4075314;GSM4075317;GSM4075320;GSM4075323;GSM4075326;GSM4075329;GSM4075332;GSM4075335;GSM4075338	GSM4075265;GSM4075268;GSM4075271;GSM4075274;GSM4075277;GSM4075280;GSM4075283;GSM4075286;GSM4075289;GSM4075292;GSM4075295;GSM4075298;GSM4075301;GSM4075304;GSM4075307;GSM4075309;GSM4075312;GSM4075315;GSM4075318;GSM4075321;GSM4075324;GSM4075327;GSM4075330;GSM4075333;GSM4075336	39.0588	37.7176	No
GSE55169	ox st mrc5	30m	pro-aging	GSM1330709;GSM1330712	GSM1330708; GSM1330711	73.1687	55.3692	Yes
GSE55169	ox st mrc5	2h	pro-aging	GSM1330710;GSM1330713	GSM1330708;: GSM1330711	52.6327	55.3692	No
GSE55169	ox st bj cell line	30m	pro-aging	GSM1330715;GSM1330718	GSM1330714; GSM1330717	58.9078	55.8835	Yes
GSE55169	ox st bj cell line	2h	pro-aging	GSM1330716;GSM1330719	GSM1330714; GSM1330717	56.0571	55.8835	Yes
GSE65145	rapa	-	rejuvenation	GSM1588055;GSM1588056	GSM1588053;GSM1588054	95.9579	98.6054	Yes
GSE54413	ubvb inflam	-	pro-aging	GSM1314616;GSM1314617;GSM1314618;GSM1314619;GSM1314620	GSM1314621;GSM1314622;GSM1314623;GSM1314624	49.1742	46.562	Yes
GSE89831	hypo	-	rejuvenation	GSM2390150;GSM2390156;GSM2390162	GSM2390149;GSM2390155;GSM2390161	44.0846	56.1693	Yes
GSE74220	Osteoathri il-1b	-	pro-aging	GSM1914780;GSM1914781;GSM1914782	GSM1914777;GSM1914778;GSM1914779	72.7614	69.002	Yes
GSE60340	Senes aging	NA	pro-aging	GSM1473776;GSM1473779;GSM1473781	GSM1473770;GSM1473772;GSM1473774	56.3107	57.5679	No
GSE60340	Senes replicative sensecence	NA	pro-aging	GSM1473784;GSM1473786;GSM1473788	GSM1473770;GSM1473772;GSM1473774	65.5609	57.5679	Yes
GSE60340	Senes induced adriamycin	NA	pro-aging	GSM1473790;GSM1473792;GSM1473794	GSM1473770;GSM1473772;GSM1473774	55.9716	57.5679	No
GSE60340	Senes induced 5-aza	NA	pro-aging	GSM1473796;GSM1473798;GSM1473800	GSM1473770;GSM1473772;GSM1473774	46.177	57.5679	No
GSE60340	Senes induced h202	NA	pro-aging	GSM1473803;GSM1473805;GSM1473807	GSM1473770;GSM1473772;GSM1473774	57.4927	57.5679	No
GSE60340	senes quiesecent	NA	pro-aging	GSM1473810;GSM1473812;GSM1473815	GSM1473770;GSM1473772;GSM1473774	57.4324	57.5679	No
GSE60340	senes inmortla sponatenous	NA	pro-aging	GSM1473759;GSM1473764;GSM1473767	GSM1473770;GSM1473772;GSM1473774	65.584	57.5679	Yes
GSE97265	repro	fib adult	rejuvenation	GSM2560384;GSM2560385	GSM2560383	28.385	44.5538	Yes
GSE97265	repro	fib senes	rejuvenation	GSM2560387;GSM2560388	GSM2560386	25.9038	76.7946	Yes
GSE139963	hypo	NA	rejuvenation	GSM4150589;GSM4150590;GSM4150591	GSM4150583;GSM4150584;GSM4150585	71.4022	75.519	Yes
GSE63577	Sen MRC-5 72	replicative	pro-aging	GSM1553085;GSM1553086;GSM1553087	GSM1553082;GSM1553083;GSM1553084	62.9683	66.2544	No
GSE63577	Sen BJ fibroblast 72	replicative	pro-aging	GSM1553091;GSM1553092;GSM1553093	GSM1553088;GSM1553089;GSM1553090	54.2057	40.9416	Yes
GSE63577	Sen IMR-90 fibroblast 72	replicative	pro-aging	GSM1553103;GSM1553104;GSM1553105	GSM1553100;GSM1553101;GSM1553102	75.2004	57.8245	Yes
GSE63577	Sen WI-38 fibroblast 72	replicative	pro-aging	GSM1553109;GSM1553110;GSM1553111	GSM1553106;GSM1553107;GSM1553108	78.9882	47.1719	Yes
GSE63577	Sen HFF-5 74	replicative	pro-aging	GSM1553097;GSM1553098;GSM1553099	GSM1553094;GSM1553095;GSM1553096	71.1381	33.7273	Yes
GSE75962	ox st h202	-	pro-aging	GSM1971013;GSM1971015	GSM1971012;GSM1971014	64.1112	65.0028	No
GSE103938	ras oncogene senescence vs. prolif control	note:oksm not included due to odd ‚Äòsenescence‚Äô framing (not usual reprogramming)	pro-aging	GSM2786639;GSM2786646;GSM2786653	GSM2786635;GSM2786642;GSM2786649	70.8364	57.9518	Yes
GSE103938	ras oncogene senescence 10nM rap vs. ras oncogene sensecence	note:oksm not included due to odd ‚Äòsenescence‚Äô framing (not usual reprogramming)	rejuvenation	GSM2786641;GSM2786648;GSM2786655	GSM2786639;GSM2786646;GSM2786653	68.1692	70.8364	Yes
GSE103938	ras oncogene senescence 1nM rap vs. ras oncogene sensecence	note:oksm not included due to odd ‚Äòsenescence‚Äô framing (not usual reprogramming)	rejuvenation	GSM2786640;GSM2786647;GSM2786654	GSM2786639;GSM2786646;GSM2786653	71.3365	70.8364	No
GSE58910	sen by ox st	-	pro-aging	GSM1422183;GSM1422184	GSM1422181;GSM1422182	53.2825	51.8115	Yes
GSE262856	senes oncogene	5d	pro-aging	GSM8180566;GSM8180567;GSM8180568	GSM8180572;GSM8180573;GSM8180574	46.4035	36.6758	Yes
GSE262856	senes oncogene	8d	pro-aging	GSM8180569;GSM8180570;GSM8180571	GSM8180572;GSM8180573;GSM8180574	43.37	36.6758	Yes
GSE262856	bleomycin (pdl30) senescence	-	pro-aging	GSM8180581;GSM8180582;GSM8180583	GSM8180575;GSM8180576;GSM8180577	49.2274	27.7985	Yes
GSE262856	bleomycin (rasni) senescence	-	pro-aging	GSM8180578;GSM8180579;GSM8180580	GSM8180575;GSM8180576;GSM8180577	52.6858	27.7985	Yes
GSE262856	replicative senescence	-	pro-aging	GSM8180584;GSM8180585;GSM8180586	GSM8180575;GSM8180576;GSM8180577	67.8864	27.7985	Yes
GSE118494	oncogene senescence	-	pro-aging	GSM3375551	GSM3375552	57.4885	40.8597	Yes
GSE118494	oncogene senescence caph2 silenced	-	rejuvenation	GSM3375554;GSM3375555;GSM3375556	GSM3375553;GSM3375551	75.1184	66.7675	No
GSE118494	oncogene supposed older but complex	unsure	pro-aging	GSM4213730;GSM4213731;GSM4213732	GSM4213729	85.568	81.6496	Yes
GSE102674	rapa	-	rejuvenation	GSM2742729;GSM2742730;GSM2742731;GSM2742732	GSM2742709;GSM2742710;GSM2742711;GSM2742712	64.7972	67.5906	Yes
GSE102674	AZD8055	unsure	rejuvenation	GSM2742725;GSM2742726;GSM2742727;GSM2742728	GSM2742709;GSM2742710;GSM2742711;GSM2742712	62.0752	67.5906	Yes
GSE65145	rapa	-	rejuvenation	GSM1588055;GSM1588056	GSM1588051;GSM1588052	95.9579	78.9873	No
GSE113957	progeria	-	pro-aging	GSM3124693;GSM3124694;GSM3124695;GSM3124696;GSM3124697;GSM3124698;GSM3124699;GSM3124700;GSM3124701;GSM3124702	GSM3124560;GSM3124625;GSM3124626;GSM3124627;GSM3124628;GSM3124629;GSM3124630;GSM3124631;GSM3124632;GSM3124633;GSM3124634;GSM3124635;GSM3124636;GSM3124637	35.9828	47.6563	No
GSE179848	DEX	p6;p9;p10;p11;p12;p13;p14;p15;p16;p18;p19;p21;p22;p24;p25;p27;p30;p31;p33;p36_wildtype	pro-aging	GSM5435661;GSM5435672;GSM5435662;GSM5435673;GSM5435783;GSM5435684;GSM5435784;GSM5435785;GSM5435663;GSM5435674;GSM5435786;GSM5435685;GSM5435787;GSM5435788;GSM5435664;GSM5435675;GSM5435789;GSM5435686;GSM5435790;GSM5435665;GSM5435676;GSM5435687;GSM5435666;GSM5435677;GSM5435688;GSM5435667;GSM5435678;GSM5435689;GSM5435668;GSM5435679;GSM5435669;GSM5435680;GSM5435690;GSM5435670;GSM5435681;GSM5435671;GSM…	GSM5435611;GSM5435622;GSM5435773;GSM5435778;GSM5435849;GSM5435887;GSM5435612;GSM5435623;GSM5435767;GSM5435798;GSM5435803;GSM5435890;GSM5435633;GSM5435768;GSM5435775;GSM5435780;GSM5435792;GSM5435891;GSM5435769;GSM5435799;GSM5435804;GSM5435892;GSM5435613;GSM5435624;GSM5435770;GSM5435776;GSM5435781;GSM5435793;GSM5435893;GSM5435634;GSM5435771;GSM5435777;GSM5435782;GSM5435800;GSM5435805;GSM5435894;GSM…	56.7768	45.8072	Yes
GSE179848	mitoNUITs	p6;p9;p10;p12;p13;p15;p16;p18;p19;p21;p24;p27;p30;p31;p33_wildtype	rejuvenation	GSM5435691;GSM5435701;GSM5435692;GSM5435702;GSM5435709;GSM5435693;GSM5435703;GSM5435710;GSM5435694;GSM5435704;GSM5435711;GSM5435695;GSM5435705;GSM5435712;GSM5435696;GSM5435706;GSM5435707;GSM5435697;GSM5435698;GSM5435714;GSM5435699	GSM5435611;GSM5435622;GSM5435773;GSM5435778;GSM5435849;GSM5435887;GSM5435612;GSM5435623;GSM5435767;GSM5435798;GSM5435803;GSM5435890;GSM5435633;GSM5435768;GSM5435775;GSM5435780;GSM5435792;GSM5435891;GSM5435613;GSM5435624;GSM5435770;GSM5435776;GSM5435781;GSM5435793;GSM5435893;GSM5435634;GSM5435771;GSM5435777;GSM5435782;GSM5435800;GSM5435805;GSM5435894;GSM5435614;GSM5435625;GSM5435896;GSM5435635;GSM…	43.9135	45.3586	Yes
GSE179848	Oligomycin	p6;p9;p10;p12;p13;p15;p18;p22;p24;p33;p36_wildtype	pro-aging	GSM5435741;GSM5435747;GSM5435742;GSM5435748;GSM5435757;GSM5435743;GSM5435749;GSM5435758;GSM5435744;GSM5435750;GSM5435745;GSM5435751;GSM5435759;GSM5435746;GSM5435752;GSM5435754;GSM5435755	GSM5435611;GSM5435622;GSM5435773;GSM5435778;GSM5435849;GSM5435887;GSM5435612;GSM5435623;GSM5435767;GSM5435798;GSM5435803;GSM5435890;GSM5435633;GSM5435768;GSM5435775;GSM5435780;GSM5435792;GSM5435891;GSM5435613;GSM5435624;GSM5435770;GSM5435776;GSM5435781;GSM5435793;GSM5435893;GSM5435634;GSM5435771;GSM5435777;GSM5435782;GSM5435800;GSM5435805;GSM5435894;GSM5435614;GSM5435625;GSM5435896;GSM5435615;GSM…	47.1079	45.0867	Yes
GSE179848	Oligomycin+DEX	p6;p9;p10;p12_wildtype	pro-aging	GSM5435761;GSM5435764;GSM5435762;GSM5435765;GSM5435766;GSM5435763	GSM5435611;GSM5435622;GSM5435773;GSM5435778;GSM5435849;GSM5435887;GSM5435612;GSM5435623;GSM5435767;GSM5435798;GSM5435803;GSM5435890;GSM5435633;GSM5435768;GSM5435775;GSM5435780;GSM5435792;GSM5435891;GSM5435613;GSM5435624;GSM5435770;GSM5435776;GSM5435781;GSM5435793;GSM5435893	46.6641	42.6653	Yes
GSE179848	Contact_Inhibition	p6;p9_wildtype	pro-aging	GSM5435813;GSM5435814;GSM5435815;GSM5435816;GSM5435817;GSM5435818;GSM5435819;GSM5435820;GSM5435821;GSM5435822;GSM5435823;GSM5435824;GSM5435825;GSM5435826;GSM5435834;GSM5435835;GSM5435836;GSM5435837;GSM5435838;GSM5435839;GSM5435840;GSM5435841;GSM5435842;GSM5435843;GSM5435844;GSM5435845;GSM5435846;GSM5435806;GSM5435807;GSM5435808;GSM5435809;GSM5435810;GSM5435811;GSM5435812;GSM5435827;GSM5435828;GSM…	GSM5435611;GSM5435622;GSM5435773;GSM5435778;GSM5435849;GSM5435887;GSM5435612;GSM5435623;GSM5435767;GSM5435798;GSM5435803;GSM5435890	54.9603	39.2308	Yes
GSE179848	Galactose	p5;p7;p9;p11;p13;p15;p17;p18;p19;p20;p22;p24;p25_wildtype	pro-aging	GSM5435904;GSM5435905;GSM5435906;GSM5435854;GSM5435907;GSM5435855;GSM5435908;GSM5435856;GSM5435909;GSM5435910;GSM5435857;GSM5435911;GSM5435858;GSM5435912;GSM5435859;GSM5435860;GSM5435861;GSM5435913	GSM5435796;GSM5435801;GSM5435848;GSM5435886;GSM5435797;GSM5435802;GSM5435850;GSM5435888;GSM5435612;GSM5435623;GSM5435767;GSM5435798;GSM5435803;GSM5435890;GSM5435769;GSM5435799;GSM5435804;GSM5435892;GSM5435634;GSM5435771;GSM5435777;GSM5435782;GSM5435800;GSM5435805;GSM5435894;GSM5435614;GSM5435625;GSM5435896;GSM5435898;GSM5435615;GSM5435626;GSM5435899;GSM5435636;GSM5435900;GSM5435851;GSM5435901;GSM…	52.1914	42.4782	Yes
GSE179848	2-Deoxyglucose	p5;p7;p9;p11;p13;p15;p16;p17;p18;p19;p20;p22;p24;p25_wildtype	rejuvenation	GSM5435862;GSM5435914;GSM5435863;GSM5435915;GSM5435864;GSM5435916;GSM5435865;GSM5435917;GSM5435866;GSM5435918;GSM5435867;GSM5435919;GSM5435868;GSM5435920;GSM5435869;GSM5435921;GSM5435870;GSM5435922;GSM5435871;GSM5435923;GSM5435872;GSM5435924;GSM5435873;GSM5435925	GSM5435796;GSM5435801;GSM5435848;GSM5435886;GSM5435797;GSM5435802;GSM5435850;GSM5435888;GSM5435612;GSM5435623;GSM5435767;GSM5435798;GSM5435803;GSM5435890;GSM5435769;GSM5435799;GSM5435804;GSM5435892;GSM5435634;GSM5435771;GSM5435777;GSM5435782;GSM5435800;GSM5435805;GSM5435894;GSM5435614;GSM5435625;GSM5435896;GSM5435635;GSM5435795;GSM5435897;GSM5435898;GSM5435615;GSM5435626;GSM5435899;GSM5435636;GSM…	49.6903	42.2819	No
GSE179848	betahydroxybutyrate	p5;p7;p9;p11;p13;p15;p16;p17;p18;p20;p22;p24;p25_wildtype	rejuvenation	GSM5435874;GSM5435926;GSM5435875;GSM5435927;GSM5435876;GSM5435928;GSM5435877;GSM5435929;GSM5435878;GSM5435930;GSM5435931;GSM5435879;GSM5435932;GSM5435880;GSM5435933;GSM5435881;GSM5435882;GSM5435883;GSM5435884	GSM5435796;GSM5435801;GSM5435848;GSM5435886;GSM5435797;GSM5435802;GSM5435850;GSM5435888;GSM5435612;GSM5435623;GSM5435767;GSM5435798;GSM5435803;GSM5435890;GSM5435769;GSM5435799;GSM5435804;GSM5435892;GSM5435634;GSM5435771;GSM5435777;GSM5435782;GSM5435800;GSM5435805;GSM5435894;GSM5435614;GSM5435625;GSM5435896;GSM5435635;GSM5435795;GSM5435897;GSM5435898;GSM5435615;GSM5435626;GSM5435899;GSM5435851;GSM…	48.3879	42.4788	No
GSE165180	ipsc	vs basetline, no time series	rejuvenation	|GSM5391783;GSM5391784	GSM5391793;GSM5391815;GSM5391838	25.5843	47.9026	Yes
GSE165180	Reprogrammed	10 days (active reprogramming period) 10.1242/dev.200755	rejuvenation	GSM5391803;GSM5391826;GSM5391851	GSM5391794;GSM5391798;GSM5391816;GSM5391820;GSM5391839;GSM5391843	43.8595	48.4648	Yes
GSE165180	Reprogrammed	13 days (active reprogramming period) 10.1242/dev.200755	rejuvenation	GSM5391804;GSM5391827;GSM5391852	GSM5391795;GSM5391799;GSM5391817;GSM5391821;GSM5391840;GSM5391844	38.5555	51.6101	Yes
GSE201710	OKSM	20d	rejuvenation	GSM8478792;GSM8478793	GSM8478790;GSM8478791	77.1638	79.4877	Yes
GSE201710	OKSM	50d	rejuvenation	GSM8478796;GSM8478797	GSM8478794;GSM8478795	80.7029	84.7846	Yes
GSE201710	OSKM	85d	rejuvenation	GSM8478800;GSM8478801	GSM8478798;GSM8478799	87.1031	92.9387	Yes
GSE201710	OSKM	125d	rejuvenation	GSM8478788;GSM8478789	GSM8478786;GSM8478787	101.314	98.2727	No
