# Supplementary material for: REVIVE: a computational platform for systematically identifying rejuvenating chemical and genetic perturbations
Source: Aging (Albany NY). 2025 Nov 25;17(11):2844–58. doi: 10.18632/aging.206342 (PMC12705183; doi:10.18632/aging.206342)
Supplement: Supplementary Table 5 [file aging-17-11-206342-s006.xlsx]

## Sheet: Sheet1
Supplementary Table 5. Genes associated with each of 12 aging hallmarks based on the Aging Atlas.
Symbol	Gene_Set
SESN3	altered intercellular communication
SOCS2	altered intercellular communication
TGFB1	altered intercellular communication
TNF	altered intercellular communication
TOP3B	altered intercellular communication
SERPINE1	cellular senescence
SIN3A	cellular senescence
SOD1	cellular senescence
STAT3	cellular senescence
STAT5A	cellular senescence
STAT5B	cellular senescence
STK11	cellular senescence
TAF1	cellular senescence
TCF3	cellular senescence
TFDP1	cellular senescence
TOP2A	cellular senescence
ADIPOQ	deregulated nutrient sensing
ADIPOR1	deregulated nutrient sensing
ADIPOR2	deregulated nutrient sensing
AGPAT2	deregulated nutrient sensing
AKT1S1	deregulated nutrient sensing
AKT2	deregulated nutrient sensing
APOC3	deregulated nutrient sensing
AR	deregulated nutrient sensing
BSCL2	deregulated nutrient sensing
CETP	deregulated nutrient sensing
CNR1	deregulated nutrient sensing
FGF21	deregulated nutrient sensing
MAPK8	deregulated nutrient sensing
NLRP3	deregulated nutrient sensing
PPARG	deregulated nutrient sensing
PRKAA1	deregulated nutrient sensing
PRKAA2	deregulated nutrient sensing
RICTOR	deregulated nutrient sensing
RPTOR	deregulated nutrient sensing
SQSTM1	deregulated nutrient sensing
TSC1	deregulated nutrient sensing
TSC2	deregulated nutrient sensing
EHMT1	epigenetic alterations
EHMT2	epigenetic alterations
FLT1	epigenetic alterations
GSTP1	epigenetic alterations
GTF2H2	epigenetic alterations
HDAC1	epigenetic alterations
HDAC3	epigenetic alterations
HELLS	epigenetic alterations
HSF1	epigenetic alterations
HSPA9	epigenetic alterations
SIRT1	epigenetic alterations
SIRT6	epigenetic alterations
SIRT7	epigenetic alterations
ABL1	genomic instability
ADH1B	genomic instability
APEX1	genomic instability
APTX	genomic instability
ATM	genomic instability
BLM	genomic instability
BRCA1	genomic instability
BRCA2	genomic instability
BUB1B	genomic instability
CBX7	genomic instability
CDKN1A	genomic instability
CHEK2	genomic instability
CREB1	genomic instability
DDIT3	genomic instability
E2F1	genomic instability
EEF1A1	genomic instability
EEF1E1	genomic instability
EP300	genomic instability
ERCC1	genomic instability
ERCC2	genomic instability
ERCC3	genomic instability
ERCC4	genomic instability
ERCC5	genomic instability
ERCC8	genomic instability
ESR1	genomic instability
FEN1	genomic instability
H2AFX	genomic instability
HBP1	genomic instability
HIC1	genomic instability
HMGB1	genomic instability
HMGB2	genomic instability
HOXB7	genomic instability
HOXC4	genomic instability
JUN	genomic instability
LMNA	genomic instability
MLH1	genomic instability
NBN	genomic instability
NFE2L2	genomic instability
NUDT1	genomic instability
PARP1	genomic instability
PCNA	genomic instability
POLA1	genomic instability
POLB	genomic instability
POLD1	genomic instability
PPM1D	genomic instability
RAD27	genomic instability
RAD51	genomic instability
RAD52	genomic instability
RECQL4	genomic instability
RFC4	genomic instability
SNCG	genomic instability
SP1	genomic instability
SPRTN	genomic instability
SUMO1	genomic instability
TBP	genomic instability
TFAP2A	genomic instability
TP53BP1	genomic instability
TP63	genomic instability
TP73	genomic instability
UBE2I	genomic instability
WRN	genomic instability
XPA	genomic instability
ZMPSTE24	genomic instability
AARS1	loss of proteostasis
ATF6B	loss of proteostasis
CALR	loss of proteostasis
CREB3	loss of proteostasis
CREB3L1	loss of proteostasis
CREB3L2	loss of proteostasis
CREB3L3	loss of proteostasis
CREB3L4	loss of proteostasis
CSNK1E	loss of proteostasis
DBN1	loss of proteostasis
EEF2	loss of proteostasis
EIF5A2	loss of proteostasis
GCLC	loss of proteostasis
GCLM	loss of proteostasis
GHR	loss of proteostasis
GHRH	loss of proteostasis
HSPA1A	loss of proteostasis
HSPA1B	loss of proteostasis
HSPA8	loss of proteostasis
HTRA2	loss of proteostasis
HTT	loss of proteostasis
MAPT	loss of proteostasis
PAPPA	loss of proteostasis
PCMT1	loss of proteostasis
POU1F1	loss of proteostasis
PPP1CA	loss of proteostasis
PTPN1	loss of proteostasis
STUB1	loss of proteostasis
TIMP1	loss of proteostasis
TOPORS	loss of proteostasis
TPP2	loss of proteostasis
UBB	loss of proteostasis
UCHL1	loss of proteostasis
VCP	loss of proteostasis
AIFM1	mitochondrial dysfunction
AKT3	mitochondrial dysfunction
ATP5O	mitochondrial dysfunction
BAK1	mitochondrial dysfunction
COQ7	mitochondrial dysfunction
DLAT	mitochondrial dysfunction
HSPD1	mitochondrial dysfunction
MT-CO1	mitochondrial dysfunction
PIK3R1	mitochondrial dysfunction
POLG	mitochondrial dysfunction
PRKDC	mitochondrial dysfunction
SDHC	mitochondrial dysfunction
SIRT3	mitochondrial dysfunction
TRAP1	mitochondrial dysfunction
UCP1	mitochondrial dysfunction
UCP2	mitochondrial dysfunction
UCP3	mitochondrial dysfunction
BCL10	NF-κB related gene
BCL2A1	NF-κB related gene
BCL2L1	NF-κB related gene
BIRC2	NF-κB related gene
BIRC3	NF-κB related gene
BTK	NF-κB related gene
CARD10	NF-κB related gene
CCL19	NF-κB related gene
CCL21	NF-κB related gene
CCL4	NF-κB related gene
CD14	NF-κB related gene
CD40LG	NF-κB related gene
CFLAR	NF-κB related gene
DDX58	NF-κB related gene
EDARADD	NF-κB related gene
IKBKG	NF-κB related gene
IL1R1	NF-κB related gene
MAP3K14	NF-κB related gene
MAP3K7	NF-κB related gene
PIAS4	NF-κB related gene
PIDD1	NF-κB related gene
PLCG1	NF-κB related gene
PRKCB	NF-κB related gene
PRKCQ	NF-κB related gene
RELB	NF-κB related gene
RIPK1	NF-κB related gene
SYK	NF-κB related gene
TAB1	NF-κB related gene
TAB2	NF-κB related gene
TICAM1	NF-κB related gene
TIRAP	NF-κB related gene
TLR4	NF-κB related gene
TNFAIP3	NF-κB related gene
TNFRSF11A	NF-κB related gene
TNFRSF13C	NF-κB related gene
TNFSF11	NF-κB related gene
TNFSF13B	NF-κB related gene
TNFSF14	NF-κB related gene
TRADD	NF-κB related gene
TRAF1	NF-κB related gene
TRAF2	NF-κB related gene
TRAF3	NF-κB related gene
TRAF6	NF-κB related gene
TRIM25	NF-κB related gene
VCAM1	NF-κB related gene
XIAP	NF-κB related gene
ZAP70	NF-κB related gene
A2M	others
ADH5	others
ALDH2	others
ALDH9A1	others
APOE	others
APP	others
ARHGAP1	others
ARID5A	others
ARNTL	others
ATF4	others
ATG101	others
ATG13	others
ATG5	others
BAX	others
BCL2	others
BUB3	others
C1QA	others
CACNA1A	others
CAMK4	others
CAMKK2	others
CAT	others
CDC42	others
CDK7	others
CDKN2B	others
CEBPA	others
CEBPB	others
CHCHD2	others
CISD2	others
CLOCK	others
CREB5	others
CREBBP	others
CTF1	others
DCTN1	others
DGAT1	others
EIF4E	others
EIF4E1B	others
EIF4E2	others
EIF4EBP1	others
EMD	others
ENO1	others
ENO2	others
EPS8	others
ERBB2	others
ERCC6	others
FADS1	others
FAS	others
FBP1	others
FGF23	others
FGFR3	others
FOXL2	others
FOXO1	others
FOXO3	others
GAPDH	others
GCK	others
GDF11	others
GPX4	others
GRIA2	others
GRN	others
GSK3B	others
GSR	others
GSS	others
HESX1	others
HIF1A	others
HK3	others
HSP90AA1	others
IFNB1	others
IGF1R	others
IGFBP2	others
IL2RB	others
IL2RG	others
KCNAB3	others
KL	others
KLF4	others
KRAS	others
MIF	others
MSRA	others
MT1E	others
MVK	others
MXI1	others
MYD88	others
MYLK	others
NCOR2	others
NFKB2	others
NR3C1	others
NRAS	others
PCK1	others
PDGFRB	others
PDPK1	others
PEX5	others
PIGF	others
PLAU	others
PLAUR	others
PLCG2	others
PMCH	others
PON1	others
PPARA	others
PRDX1	others
PRKAB1	others
PRKAB2	others
PRKACA	others
PRKACG	others
PRKAG1	others
PRKAG2	others
PRKAG3	others
PRKCA	others
PROP1	others
PSAT1	others
PTPN11	others
PYCR1	others
RACK1	others
RAE1	others
RB1	others
RB1CC1	others
RET	others
RGN	others
RHEB	others
RORA	others
RPA1	others
RPS6KB1	others
RPS6KB2	others
S100B	others
SESN1	others
SESN2	others
SHC1	others
SIRT2	others
SLC13A1	others
SOD2	others
SST	others
SSTR3	others
SUN1	others
TMEM67	others
TNFRSF11B	others
TOP1	others
TOP2B	others
TP53	others
TRPS1	others
TRPV1	others
TXN	others
ULK1	others
VEGFA	others
XRCC6	others
AREG	senescence-associated secretory phenotype
AXL	senescence-associated secretory phenotype
BMP2	senescence-associated secretory phenotype
BMP6	senescence-associated secretory phenotype
CCL1	senescence-associated secretory phenotype
CCL13	senescence-associated secretory phenotype
CCL20	senescence-associated secretory phenotype
CCL26	senescence-associated secretory phenotype
CCL3	senescence-associated secretory phenotype
CCL7	senescence-associated secretory phenotype
CD55	senescence-associated secretory phenotype
CD9	senescence-associated secretory phenotype
CSF2RB	senescence-associated secretory phenotype
CXCL1	senescence-associated secretory phenotype
CXCL12	senescence-associated secretory phenotype
CXCL2	senescence-associated secretory phenotype
CXCL5	senescence-associated secretory phenotype
CXCL6	senescence-associated secretory phenotype
CXCL8	senescence-associated secretory phenotype
FGF7	senescence-associated secretory phenotype
GDF15	senescence-associated secretory phenotype
HGF	senescence-associated secretory phenotype
IGFBP1	senescence-associated secretory phenotype
IL15	senescence-associated secretory phenotype
IL1A	senescence-associated secretory phenotype
IL1B	senescence-associated secretory phenotype
IL6ST	senescence-associated secretory phenotype
ITGA2	senescence-associated secretory phenotype
MMP1	senescence-associated secretory phenotype
MMP10	senescence-associated secretory phenotype
MMP12	senescence-associated secretory phenotype
MMP13	senescence-associated secretory phenotype
MMP14	senescence-associated secretory phenotype
MMP2	senescence-associated secretory phenotype
MMP3	senescence-associated secretory phenotype
MMP7	senescence-associated secretory phenotype
PECAM1	senescence-associated secretory phenotype
PTGES	senescence-associated secretory phenotype
RPS6KA5	senescence-associated secretory phenotype
SERPINB2	senescence-associated secretory phenotype
TIMP2	senescence-associated secretory phenotype
TNFRSF10C	senescence-associated secretory phenotype
TNFRSF1A	senescence-associated secretory phenotype
TNFRSF1B	senescence-associated secretory phenotype
VEGFC	senescence-associated secretory phenotype
WNT2	senescence-associated secretory phenotype
ATR	stem cell exhaustion
BMI1	stem cell exhaustion
CCNA2	stem cell exhaustion
CTGF	stem cell exhaustion
DLL3	stem cell exhaustion
JAK2	stem cell exhaustion
MAPK14	stem cell exhaustion
MAPK3	stem cell exhaustion
MAPK9	stem cell exhaustion
MED1	stem cell exhaustion
NOG	stem cell exhaustion
YWHAZ	stem cell exhaustion
TERC	telomere attrition
TERF1	telomere attrition
TERF2	telomere attrition
TERT	telomere attrition
XRCC5	telomere attrition
