# Supplementary material for: REVIVE: a computational platform for systematically identifying rejuvenating chemical and genetic perturbations
Source: Aging (Albany NY). 2025 Nov 25;17(11):2844–58. doi: 10.18632/aging.206342 (PMC12705183; doi:10.18632/aging.206342)
Supplement: Supplementary Table 6 [file aging-17-11-206342-s007.xlsx]

## Sheet: TableS7_raw
Supplementary Table 6. Identifiers of samples included in the perturbation screen.
CPC006_HA1E_6H_X2_B3_DUO52HI53LO:B15
CPC006_HA1E_6H_X3_B3_DUO52HI53LO:B15
CPC006_HA1E_6H_X5_B4_DUO52HI53LO:B15
CPC006_HA1E_6H_X1_B3_DUO52HI53LO:B15
CPC006_HA1E_6H_X4_B4_DUO52HI53LO:B15
CPC010_HA1E_6H_X3_F1B3_DUO52HI53LO:M02
CPC007_HA1E_6H_X1_B3_DUO52HI53LO:I02
CPC002_HA1E_6H_X1_B3_DUO52HI53LO:I16
CPC002_HA1E_6H_X2_B3_DUO52HI53LO:I15
KTOX002_HPTEC_6H_X2_B18:I21
KTOX002_HPTEC_6H_X2_B18:I24
CPC012_HA1E_6H_X1_F1B3_DUO52HI53LO:M10
CPC014_HA1E_6H_X1_F1B3_DUO52HI53LO:I16
CPC020_HA1E_6H_X2_F1B3_DUO52HI53LO:F06
CPC020_HA1E_6H_X3_F1B3_DUO52HI53LO:B18
CPC007_HA1E_6H_X3_B3_DUO52HI53LO:H02
KTOX002_HPTEC_6H_X1_B18:I24
CPC007_HA1E_6H_X1_B3_DUO52HI53LO:F02
HDAC002_HA1E_6H_X4_B7_DUO52HI53LO:E24
CPC013_HA1E_6H_X1_F1B3_DUO52HI53LO:E06
CPC004_HA1E_6H_X1_B3_DUO52HI53LO:F06
CPC007_HA1E_6H_X1_B3_DUO52HI53LO:H02
CPC020_HA1E_6H_X2_F1B3_DUO52HI53LO:B17
CPC003_HA1E_6H_X3_B3_DUO52HI53LO:I16
CPC004_HA1E_6H_X1_B3_DUO52HI53LO:N09
CPC004_HA1E_6H_X2_B3_DUO52HI53LO:M09
CPC006_HA1E_6H_X4_B4_DUO52HI53LO:A18
CPC009_HA1E_6H_X1_B4_DUO52HI53LO:A18
KTOX002_HPTEC_6H_X2_B18:I19
KTOX002_HPTEC_6H_X3_B18:A06
CPC011_HA1E_6H_X3_F1B3_DUO52HI53LO:N01
CPC013_HA1E_6H_X1_F1B3_DUO52HI53LO:B18
CPC002_HA1E_6H_X2_B3_DUO52HI53LO:E06
CPC001_HA1E_6H_X1_B3_DUO52HI53LO:F05
CPC007_HA1E_6H_X3_B3_DUO52HI53LO:N02
CPC007_HA1E_6H_X3_B3_DUO52HI53LO:I01
CPC009_HA1E_6H_X3_B4_DUO52HI53LO:B18
KTOX002_HPTEC_6H_X2_B18:A12
KTOX002_HPTEC_6H_X1_B18:J24
KTOX002_HPTEC_6H_X3_B18:I24
CPC012_HA1E_6H_X3_F1B3_DUO52HI53LO:B18
CPC014_HA1E_6H_X2_F1B3_DUO52HI53LO:J16
CPC014_HA1E_6H_X3_F1B3_DUO52HI53LO:I16
CPC020_HA1E_6H_X1_F1B3_DUO52HI53LO:F05
CPC006_HA1E_6H_X3_B3_DUO52HI53LO:N10
CPC009_HA1E_6H_X3_B4_DUO52HI53LO:M10
HDAC002_HA1E_6H_X4_B7_DUO52HI53LO:G24
KHW001_HA1E_6H_X1_F1B3_DUO52HI53LO:G17
CPC007_HA1E_6H_X3_B3_DUO52HI53LO:K01
CPC007_HA1E_6H_X1_B3_DUO52HI53LO:E02
CPC010_HA1E_6H_X2_B4_DUO52HI53LO:H01
HDAC002_HA1E_6H_X5_B7_DUO52HI53LO:E24
KTOX002_HPTEC_6H_X1_B18:I20
KTOX002_HPTEC_6H_X2_B18:J20
KTOX002_HPTEC_6H_X1_B18:A07
CPC011_HA1E_6H_X3_F1B3_DUO52HI53LO:E02
CPC004_HA1E_6H_X2_B3_DUO52HI53LO:E06
CPC009_HA1E_6H_X1_B4_DUO52HI53LO:N10
CPC012_HA1E_6H_X1_F1B3_DUO52HI53LO:I15
CPC006_HA1E_6H_X4_B4_DUO52HI53LO:M09
KTOX002_HPTEC_6H_X2_B18:B08
CPC002_HA1E_6H_X1_B3_DUO52HI53LO:F06
CPC007_HA1E_6H_X3_B3_DUO52HI53LO:E01
CPC007_HA1E_6H_X3_B3_DUO52HI53LO:G01
CRCGN004_HA1E_6H_X6_F1B7_DUO52HI53LO:N09
CPC002_HA1E_6H_X1_B3_DUO52HI53LO:I15
CPC004_HA1E_6H_X3_B3_DUO52HI53LO:M10
CPC001_HA1E_6H_X3_B3_DUO52HI53LO:I16
CPC006_HA1E_6H_X3_B3_DUO52HI53LO:J15
KTOX002_HPTEC_6H_X3_B18:B08
CPC013_HA1E_6H_X1_F1B3_DUO52HI53LO:N10
CPC001_HA1E_6H_X3_B3_DUO52HI53LO:E06
CPC006_HA1E_6H_X5_B4_DUO52HI53LO:F05
CRCGN001_HA1E_6H_X3_F1B4_DUO52HI53LO:O22
CPC014_HA1E_6H_X3_F1B3_DUO52HI53LO:M10
CPC014_HA1E_6H_X3_F1B3_DUO52HI53LO:A18
CPC006_HA1E_6H_X1_B3_DUO52HI53LO:E05
CPC020_HA1E_6H_X1_F1B3_DUO52HI53LO:E05
CRCGN004_HA1E_6H_X6_F1B7_DUO52HI53LO:M09
CPC001_HA1E_6H_X1_B3_DUO52HI53LO:I15
CPC003_HA1E_6H_X3_B3_DUO52HI53LO:M09
CPC010_HA1E_6H_X2_B4_DUO52HI53LO:I01
CPC009_HA1E_6H_X2_F1B3_DUO52HI53LO:J16
CPC019_HA1E_6H_X2_F1B3_DUO52HI53LO:M09
CPC019_HA1E_6H_X2_F1B3_DUO52HI53LO:M10
CPC019_HA1E_6H_X1_F1B3_DUO52HI53LO:B18
CPC004_HA1E_6H_X1_B3_DUO52HI53LO:N10
CPC009_HA1E_6H_X1_B4_DUO52HI53LO:M09
HDAC002_HA1E_6H_X4_B7_DUO52HI53LO:C01
CPC019_HA1E_6H_X2_F1B3_DUO52HI53LO:N10
CPC004_HA1E_6H_X3_B3_DUO52HI53LO:A17
CPC011_HA1E_6H_X3_F1B3_DUO52HI53LO:O01
CPC019_HA1E_6H_X2_F1B3_DUO52HI53LO:E05
KTOX002_HPTEC_6H_X1_B18:I22
CPC019_HA1E_6H_X2_F1B3_DUO52HI53LO:E06
CRCGN004_HA1E_6H_X6_F1B7_DUO52HI53LO:O22
CPC001_HA1E_6H_X1_B3_DUO52HI53LO:J15
CPC009_HA1E_6H_X1_B4_DUO52HI53LO:B17
CPC020_HA1E_6H_X1_F1B3_DUO52HI53LO:E06
CPC019_HA1E_6H_X2_F1B3_DUO52HI53LO:B17
CPC011_HA1E_6H_X1_F1B3_DUO52HI53LO:O02
CPC013_HA1E_6H_X2_F1B3_DUO52HI53LO:B17
CPC007_HA1E_6H_X3_B3_DUO52HI53LO:O01
CPC005_HA1E_6H_X1_B3_DUO52HI53LO:N09
CPC007_HA1E_6H_X2_B3_DUO52HI53LO:P02
CPC006_HA1E_6H_X2_B3_DUO52HI53LO:B17
CPC007_HA1E_6H_X2_B3_DUO52HI53LO:M01
CPC004_HA1E_6H_X3_B3_DUO52HI53LO:N10
CPC009_HA1E_6H_X1_B4_DUO52HI53LO:E05
KTOX002_HPTEC_6H_X1_B18:J19
CPC010_HA1E_6H_X3_F1B3_DUO52HI53LO:L02
CPC006_HA1E_6H_X2_B3_DUO52HI53LO:J16
CPC006_HA1E_6H_X2_B3_DUO52HI53LO:A17
CPC019_HA1E_6H_X3_B4_DUO52HI53LO:M10
KTOX002_HPTEC_6H_X3_B18:A08
CPC010_HA1E_6H_X3_F1B3_DUO52HI53LO:K02
CPC005_HA1E_6H_X3_B3_DUO52HI53LO:J15
CPC007_HA1E_6H_X3_B3_DUO52HI53LO:E02
CPC001_HA1E_6H_X3_B3_DUO52HI53LO:J15
CPC001_HA1E_6H_X1_B3_DUO52HI53LO:J16
CPC010_HA1E_6H_X2_B4_DUO52HI53LO:K02
CPC010_HA1E_6H_X2_B4_DUO52HI53LO:J01
KTOX002_HPTEC_6H_X1_B18:I18
KTOX002_HPTEC_6H_X3_B18:B12
CPC020_HA1E_6H_X1_F1B3_DUO52HI53LO:I15
CRCGN004_HA1E_6H_X6_F1B7_DUO52HI53LO:I16
CPC006_HA1E_6H_X1_B3_DUO52HI53LO:A18
CPC005_HA1E_6H_X1_B3_DUO52HI53LO:I15
CPC001_HA1E_6H_X1_B3_DUO52HI53LO:M09
HDAC002_HA1E_6H_X4_B7_DUO52HI53LO:N01
CPC013_HA1E_6H_X3_F1B3_DUO52HI53LO:F05
CPC020_HA1E_6H_X2_F1B3_DUO52HI53LO:M09
CPC005_HA1E_6H_X3_B3_DUO52HI53LO:N10
CPC002_HA1E_6H_X3_B3_DUO52HI53LO:M09
CPC001_HA1E_6H_X1_B3_DUO52HI53LO:N09
CPC002_HA1E_6H_X3_B3_DUO52HI53LO:I15
HDAC002_HA1E_6H_X4_B7_DUO52HI53LO:C24
KTOX002_HPTEC_6H_X3_B18:J17
CPC014_HA1E_6H_X2_F1B3_DUO52HI53LO:N10
CRCGN004_HA1E_6H_X6_F1B7_DUO52HI53LO:O21
CPC007_HA1E_6H_X3_B3_DUO52HI53LO:M01
CPC006_HA1E_6H_X2_B3_DUO52HI53LO:F06
CPC007_HA1E_6H_X3_B3_DUO52HI53LO:F01
CPC007_HA1E_6H_X2_B3_DUO52HI53LO:O01
CPC007_HA1E_6H_X1_B3_DUO52HI53LO:E01
CPC004_HA1E_6H_X2_B3_DUO52HI53LO:F05
CPC020_HA1E_6H_X3_F1B3_DUO52HI53LO:I15
CPC005_HA1E_6H_X1_B3_DUO52HI53LO:E05
CPC007_HA1E_6H_X3_B3_DUO52HI53LO:P01
CPC010_HA1E_6H_X2_B4_DUO52HI53LO:G01
HDAC002_HA1E_6H_X5_B7_DUO52HI53LO:I01
CPC013_HA1E_6H_X2_F1B3_DUO52HI53LO:N09
CPC011_HA1E_6H_X1_F1B3_DUO52HI53LO:K02
CPC019_HA1E_6H_X2_F1B3_DUO52HI53LO:F05
CPC002_HA1E_6H_X2_B3_DUO52HI53LO:F06
CPC003_HA1E_6H_X2_B3_DUO52HI53LO:J15
CPC005_HA1E_6H_X1_B3_DUO52HI53LO:B18
CPC019_HA1E_6H_X3_B4_DUO52HI53LO:F06
HDAC002_HA1E_6H_X4_B7_DUO52HI53LO:O02
KTOX002_HPTEC_6H_X1_B18:I23
KTOX002_HPTEC_6H_X1_B18:J23
CPC012_HA1E_6H_X1_F1B3_DUO52HI53LO:J16
CPC007_HA1E_6H_X1_B3_DUO52HI53LO:O01
KTOX002_HPTEC_6H_X3_B18:A07
KTOX002_HPTEC_6H_X3_B18:J19
KTOX002_HPTEC_6H_X3_B18:B06
KTOX002_HPTEC_6H_X2_B18:B11
CPC020_HA1E_6H_X1_F1B3_DUO52HI53LO:F06
CPC020_HA1E_6H_X3_F1B3_DUO52HI53LO:N09
CPC010_HA1E_6H_X3_F1B3_DUO52HI53LO:H02
KTOX002_HPTEC_6H_X1_B18:B10
KTOX002_HPTEC_6H_X1_B18:B08
KTOX002_HPTEC_6H_X2_B18:I17
CPC005_HA1E_6H_X1_B3_DUO52HI53LO:F06
CPC002_HA1E_6H_X1_B3_DUO52HI53LO:F05
CPC019_HA1E_6H_X3_B4_DUO52HI53LO:A17
CPC009_HA1E_6H_X1_B4_DUO52HI53LO:A17
CPC010_HA1E_6H_X3_F1B3_DUO52HI53LO:N01
CPC010_HA1E_6H_X3_F1B3_DUO52HI53LO:E02
CPC014_HA1E_6H_X2_F1B3_DUO52HI53LO:M10
CPC007_HA1E_6H_X1_B3_DUO52HI53LO:G01
CPC006_HA1E_6H_X2_B3_DUO52HI53LO:M10
CPC006_HA1E_6H_X5_B4_DUO52HI53LO:I15
CPC010_HA1E_6H_X2_B4_DUO52HI53LO:P02
CPC006_HA1E_6H_X5_B4_DUO52HI53LO:A18
CPC006_HA1E_6H_X5_B4_DUO52HI53LO:M10
KTOX002_HPTEC_6H_X2_B18:I18
KTOX002_HPTEC_6H_X1_B18:A08
KTOX002_HPTEC_6H_X1_B18:J22
KTOX002_HPTEC_6H_X2_B18:J19
CPC019_HA1E_6H_X1_F1B3_DUO52HI53LO:A17
CPC004_HA1E_6H_X2_B3_DUO52HI53LO:F06
CPC006_HA1E_6H_X4_B4_DUO52HI53LO:B18
HDAC002_HA1E_6H_X4_B7_DUO52HI53LO:K02
KTOX002_HPTEC_6H_X2_B18:A10
CPC020_HA1E_6H_X3_F1B3_DUO52HI53LO:E05
CPC009_HA1E_6H_X2_F1B3_DUO52HI53LO:F06
CPC010_HA1E_6H_X3_F1B3_DUO52HI53LO:L01
CPC006_HA1E_6H_X1_B3_DUO52HI53LO:I15
CPC001_HA1E_6H_X3_B3_DUO52HI53LO:B18
CPC005_HA1E_6H_X1_B3_DUO52HI53LO:J16
CPC002_HA1E_6H_X3_B3_DUO52HI53LO:I16
CPC005_HA1E_6H_X3_B3_DUO52HI53LO:N09
CPC006_HA1E_6H_X4_B4_DUO52HI53LO:I16
HDAC002_HA1E_6H_X4_B7_DUO52HI53LO:I02
KTOX002_HPTEC_6H_X1_B18:J21
KTOX002_HPTEC_6H_X1_B18:I21
CPC014_HA1E_6H_X2_F1B3_DUO52HI53LO:F05
CPC011_HA1E_6H_X3_F1B3_DUO52HI53LO:E01
CPC010_HA1E_6H_X3_F1B3_DUO52HI53LO:N02
CPC010_HA1E_6H_X3_F1B3_DUO52HI53LO:G01
CPC001_HA1E_6H_X3_B3_DUO52HI53LO:M09
CPC007_HA1E_6H_X2_B3_DUO52HI53LO:L01
CPC010_HA1E_6H_X2_B4_DUO52HI53LO:F01
CPC009_HA1E_6H_X1_B4_DUO52HI53LO:F05
HDAC002_HA1E_6H_X4_B7_DUO52HI53LO:H02
KTOX002_HPTEC_6H_X1_B18:B11
KTOX002_HPTEC_6H_X1_B18:J18
CPC013_HA1E_6H_X2_F1B3_DUO52HI53LO:M10
CPC002_HA1E_6H_X3_B3_DUO52HI53LO:B17
CPC002_HA1E_6H_X2_B3_DUO52HI53LO:M09
CPC007_HA1E_6H_X2_B3_DUO52HI53LO:O02
CPC006_HA1E_6H_X4_B4_DUO52HI53LO:N10
HDAC002_HA1E_6H_X5_B7_DUO52HI53LO:H01
CPC006_HA1E_6H_X4_B4_DUO52HI53LO:M10
KTOX002_HPTEC_6H_X3_B18:J22
CPC010_HA1E_6H_X3_F1B3_DUO52HI53LO:P01
CPC009_HA1E_6H_X2_F1B3_DUO52HI53LO:I15
CPC006_HA1E_6H_X1_B3_DUO52HI53LO:B18
CPC006_HA1E_6H_X2_B3_DUO52HI53LO:J15
CPC006_HA1E_6H_X2_B3_DUO52HI53LO:I15
CPC004_HA1E_6H_X2_B3_DUO52HI53LO:E05
CPC009_HA1E_6H_X1_B4_DUO52HI53LO:M10
HDAC002_HA1E_6H_X4_B7_DUO52HI53LO:G01
CPC010_HA1E_6H_X2_B4_DUO52HI53LO:K01
CPC010_HA1E_6H_X2_B4_DUO52HI53LO:I02
CPC009_HA1E_6H_X3_B4_DUO52HI53LO:E05
KTOX002_HPTEC_6H_X1_B18:A06
CPC011_HA1E_6H_X3_F1B3_DUO52HI53LO:I02
CPC019_HA1E_6H_X1_F1B3_DUO52HI53LO:N10
CPC019_HA1E_6H_X1_F1B3_DUO52HI53LO:I15
KTOX002_HPTEC_6H_X1_B18:I17
CPC020_HA1E_6H_X3_F1B3_DUO52HI53LO:A18
CRCGN004_HA1E_6H_X6_F1B7_DUO52HI53LO:F05
CPC001_HA1E_6H_X3_B3_DUO52HI53LO:F05
CPC019_HA1E_6H_X3_B4_DUO52HI53LO:B18
KTOX002_HPTEC_6H_X2_B18:A05
CPC014_HA1E_6H_X3_F1B3_DUO52HI53LO:J15
CPC002_HA1E_6H_X2_B3_DUO52HI53LO:J16
CPC007_HA1E_6H_X1_B3_DUO52HI53LO:L02
CPC009_HA1E_6H_X3_B4_DUO52HI53LO:E06
CPC019_HA1E_6H_X3_B4_DUO52HI53LO:J15
KTOX002_HPTEC_6H_X2_B18:B07
CPC012_HA1E_6H_X3_F1B3_DUO52HI53LO:E05
CPC020_HA1E_6H_X3_F1B3_DUO52HI53LO:M09
CPC020_HA1E_6H_X2_F1B3_DUO52HI53LO:F05
CRCGN004_HA1E_6H_X6_F1B7_DUO52HI53LO:E06
CPC002_HA1E_6H_X1_B3_DUO52HI53LO:M10
CPC005_HA1E_6H_X3_B3_DUO52HI53LO:F05
CPC005_HA1E_6H_X1_B3_DUO52HI53LO:E06
CPC010_HA1E_6H_X2_B4_DUO52HI53LO:O01
CPC013_HA1E_6H_X3_F1B3_DUO52HI53LO:M10
CPC007_HA1E_6H_X1_B3_DUO52HI53LO:M02
CPC014_HA1E_6H_X3_F1B3_DUO52HI53LO:B18
CPC007_HA1E_6H_X3_B3_DUO52HI53LO:L01
CPC007_HA1E_6H_X2_B3_DUO52HI53LO:M02
CPC002_HA1E_6H_X1_B3_DUO52HI53LO:N10
HDAC002_HA1E_6H_X4_B7_DUO52HI53LO:I23
CPC014_HA1E_6H_X1_F1B3_DUO52HI53LO:F05
CRCGN004_HA1E_6H_X6_F1B7_DUO52HI53LO:N21
CPC003_HA1E_6H_X3_B3_DUO52HI53LO:N09
CPC007_HA1E_6H_X3_B3_DUO52HI53LO:I02
KTOX002_HPTEC_6H_X2_B18:J23
CRCGN001_HA1E_6H_X3_F1B4_DUO52HI53LO:N08
CRCGN004_HA1E_6H_X6_F1B7_DUO52HI53LO:I15
CPC003_HA1E_6H_X3_B3_DUO52HI53LO:B17
CPC006_HA1E_6H_X1_B3_DUO52HI53LO:F06
CPC001_HA1E_6H_X2_B3_DUO52HI53LO:N09
CPC007_HA1E_6H_X1_B3_DUO52HI53LO:N02
CPC010_HA1E_6H_X2_B4_DUO52HI53LO:N02
KTOX002_HPTEC_6H_X3_B18:I18
KTOX002_HPTEC_6H_X1_B18:B09
KTOX002_HPTEC_6H_X3_B18:I17
CPC012_HA1E_6H_X1_F1B3_DUO52HI53LO:E06
CPC014_HA1E_6H_X2_F1B3_DUO52HI53LO:F06
CPC020_HA1E_6H_X1_F1B3_DUO52HI53LO:M09
CPC012_HA1E_6H_X3_F1B3_DUO52HI53LO:F05
CPC003_HA1E_6H_X3_B3_DUO52HI53LO:A17
CPC004_HA1E_6H_X1_B3_DUO52HI53LO:E05
KTOX002_HPTEC_6H_X1_B18:J17
CPC014_HA1E_6H_X3_F1B3_DUO52HI53LO:J16
CPC019_HA1E_6H_X1_F1B3_DUO52HI53LO:I16
CPC007_HA1E_6H_X2_B3_DUO52HI53LO:N02
CPC019_HA1E_6H_X1_F1B3_DUO52HI53LO:J16
CPC007_HA1E_6H_X3_B3_DUO52HI53LO:H01
CPC003_HA1E_6H_X3_B3_DUO52HI53LO:J15
CPC002_HA1E_6H_X2_B3_DUO52HI53LO:I16
CPC006_HA1E_6H_X5_B4_DUO52HI53LO:J15
HDAC002_HA1E_6H_X4_B7_DUO52HI53LO:I01
KTOX002_HPTEC_6H_X2_B18:I23
CPC012_HA1E_6H_X2_F1B3_DUO52HI53LO:I16
CRCGN004_HA1E_6H_X6_F1B7_DUO52HI53LO:M08
CRCGN004_HA1E_6H_X6_F1B7_DUO52HI53LO:J15
CPC004_HA1E_6H_X1_B3_DUO52HI53LO:M10
CPC010_HA1E_6H_X3_F1B3_DUO52HI53LO:P02
CPC007_HA1E_6H_X1_B3_DUO52HI53LO:H01
HDAC002_HA1E_6H_X4_B7_DUO52HI53LO:M02
KTOX002_HPTEC_6H_X3_B18:J23
CPC011_HA1E_6H_X3_F1B3_DUO52HI53LO:K01
CPC010_HA1E_6H_X3_F1B3_DUO52HI53LO:O02
CPC006_HA1E_6H_X1_B3_DUO52HI53LO:N10
CPC007_HA1E_6H_X1_B3_DUO52HI53LO:J01
CPC010_HA1E_6H_X2_B4_DUO52HI53LO:L02
CPC019_HA1E_6H_X1_F1B3_DUO52HI53LO:F06
HDAC002_HA1E_6H_X4_B7_DUO52HI53LO:H01
CPC012_HA1E_6H_X2_F1B3_DUO52HI53LO:A17
CPC012_HA1E_6H_X3_F1B3_DUO52HI53LO:A18
CPC012_HA1E_6H_X3_F1B3_DUO52HI53LO:B17
CPC012_HA1E_6H_X3_F1B3_DUO52HI53LO:A17
CRCGN004_HA1E_6H_X6_F1B7_DUO52HI53LO:E05
CPC002_HA1E_6H_X3_B3_DUO52HI53LO:J15
CPC005_HA1E_6H_X1_B3_DUO52HI53LO:F05
CPC019_HA1E_6H_X3_B4_DUO52HI53LO:E06
CPC006_HA1E_6H_X4_B4_DUO52HI53LO:I15
KTOX002_HPTEC_6H_X2_B18:A08
CPC014_HA1E_6H_X1_F1B3_DUO52HI53LO:F06
CPC011_HA1E_6H_X3_F1B3_DUO52HI53LO:H01
CPC003_HA1E_6H_X2_B3_DUO52HI53LO:I15
CPC014_HA1E_6H_X1_F1B3_DUO52HI53LO:N10
CPC002_HA1E_6H_X1_B3_DUO52HI53LO:E06
CPC003_HA1E_6H_X2_B3_DUO52HI53LO:F06
CPC005_HA1E_6H_X3_B3_DUO52HI53LO:I15
CPC006_HA1E_6H_X4_B4_DUO52HI53LO:J15
CPC009_HA1E_6H_X1_B4_DUO52HI53LO:J16
KTOX002_HPTEC_6H_X1_B18:I19
CPC014_HA1E_6H_X1_F1B3_DUO52HI53LO:J16
CPC020_HA1E_6H_X2_F1B3_DUO52HI53LO:A17
CPC011_HA1E_6H_X3_F1B3_DUO52HI53LO:G01
CPC006_HA1E_6H_X1_B3_DUO52HI53LO:J16
CPC006_HA1E_6H_X1_B3_DUO52HI53LO:I16
KTOX002_HPTEC_6H_X2_B18:J18
CPC020_HA1E_6H_X2_F1B3_DUO52HI53LO:A18
CPC013_HA1E_6H_X1_F1B3_DUO52HI53LO:E05
CPC002_HA1E_6H_X2_B3_DUO52HI53LO:N10
CPC009_HA1E_6H_X3_B4_DUO52HI53LO:J15
HDAC002_HA1E_6H_X4_B7_DUO52HI53LO:L01
KTOX002_HPTEC_6H_X1_B18:B05
KTOX002_HPTEC_6H_X3_B18:J18
KTOX002_HPTEC_6H_X1_B18:A10
KHW001_HA1E_6H_X1_F1B3_DUO52HI53LO:E17
CPC009_HA1E_6H_X2_F1B3_DUO52HI53LO:E06
CPC011_HA1E_6H_X3_F1B3_DUO52HI53LO:J01
CPC006_HA1E_6H_X2_B3_DUO52HI53LO:E05
CPC006_HA1E_6H_X1_B3_DUO52HI53LO:J15
CPC006_HA1E_6H_X5_B4_DUO52HI53LO:J16
KTOX002_HPTEC_6H_X1_B18:A11
KTOX002_HPTEC_6H_X2_B18:A07
CPC014_HA1E_6H_X3_F1B3_DUO52HI53LO:A17
CPC007_HA1E_6H_X1_B3_DUO52HI53LO:J02
CPC004_HA1E_6H_X3_B3_DUO52HI53LO:F06
CPC006_HA1E_6H_X4_B4_DUO52HI53LO:B17
CPC019_HA1E_6H_X3_B4_DUO52HI53LO:B17
CPC006_HA1E_6H_X4_B4_DUO52HI53LO:F06
CPC013_HA1E_6H_X2_F1B3_DUO52HI53LO:M09
CPC019_HA1E_6H_X2_F1B3_DUO52HI53LO:A17
CPC002_HA1E_6H_X3_B3_DUO52HI53LO:N10
CPC005_HA1E_6H_X1_B3_DUO52HI53LO:A17
HDAC002_HA1E_6H_X4_B7_DUO52HI53LO:N02
CPC010_HA1E_6H_X3_F1B3_DUO52HI53LO:F01
CPC002_HA1E_6H_X1_B3_DUO52HI53LO:M09
CPC019_HA1E_6H_X2_F1B3_DUO52HI53LO:I15
CPC012_HA1E_6H_X1_F1B3_DUO52HI53LO:F06
CPC007_HA1E_6H_X3_B3_DUO52HI53LO:K02
CPC001_HA1E_6H_X2_B3_DUO52HI53LO:I15
CPC001_HA1E_6H_X3_B3_DUO52HI53LO:F06
KTOX002_HPTEC_6H_X2_B18:J21
KTOX002_HPTEC_6H_X3_B18:A11
HDAC002_HA1E_6H_X4_B7_DUO52HI53LO:O23
CPC013_HA1E_6H_X2_F1B3_DUO52HI53LO:A17
CRCGN001_HA1E_6H_X3_F1B4_DUO52HI53LO:N21
CPC005_HA1E_6H_X1_B3_DUO52HI53LO:M09
CPC004_HA1E_6H_X1_B3_DUO52HI53LO:J16
CPC006_HA1E_6H_X4_B4_DUO52HI53LO:E05
CPC009_HA1E_6H_X3_B4_DUO52HI53LO:I15
CPC006_HA1E_6H_X5_B4_DUO52HI53LO:E06
KTOX002_HPTEC_6H_X3_B18:B05
KTOX002_HPTEC_6H_X3_B18:I19
CPC012_HA1E_6H_X3_F1B3_DUO52HI53LO:N10
CPC014_HA1E_6H_X2_F1B3_DUO52HI53LO:I16
CPC005_HA1E_6H_X3_B3_DUO52HI53LO:A17
CPC010_HA1E_6H_X2_B4_DUO52HI53LO:F02
CPC010_HA1E_6H_X2_B4_DUO52HI53LO:L01
CPC009_HA1E_6H_X3_B4_DUO52HI53LO:F06
CPC010_HA1E_6H_X2_B4_DUO52HI53LO:E02
KTOX002_HPTEC_6H_X2_B18:B10
CPC011_HA1E_6H_X3_F1B3_DUO52HI53LO:J02
CPC020_HA1E_6H_X3_F1B3_DUO52HI53LO:N10
CPC005_HA1E_6H_X3_B3_DUO52HI53LO:M09
CPC004_HA1E_6H_X1_B3_DUO52HI53LO:I15
CPC002_HA1E_6H_X2_B3_DUO52HI53LO:N09
CPC006_HA1E_6H_X3_B3_DUO52HI53LO:A18
KTOX002_HPTEC_6H_X3_B18:B10
CRCGN004_HA1E_6H_X6_F1B7_DUO52HI53LO:N08
CPC001_HA1E_6H_X3_B3_DUO52HI53LO:A17
CPC002_HA1E_6H_X3_B3_DUO52HI53LO:F05
CPC005_HA1E_6H_X1_B3_DUO52HI53LO:B17
CPC002_HA1E_6H_X1_B3_DUO52HI53LO:B17
CPC001_HA1E_6H_X2_B3_DUO52HI53LO:B17
CPC010_HA1E_6H_X2_B4_DUO52HI53LO:E01
CPC010_HA1E_6H_X3_F1B3_DUO52HI53LO:H01
CPC003_HA1E_6H_X2_B3_DUO52HI53LO:M09
CPC006_HA1E_6H_X3_B3_DUO52HI53LO:J16
CPC007_HA1E_6H_X1_B3_DUO52HI53LO:F01
KTOX002_HPTEC_6H_X3_B18:A10
CRCGN001_HA1E_6H_X3_F1B4_DUO52HI53LO:N09
CPC020_HA1E_6H_X3_F1B3_DUO52HI53LO:A17
CPC006_HA1E_6H_X3_B3_DUO52HI53LO:I16
CPC010_HA1E_6H_X2_B4_DUO52HI53LO:O02
CPC019_HA1E_6H_X3_B4_DUO52HI53LO:A18
KTOX002_HPTEC_6H_X2_B18:I22
KTOX002_HPTEC_6H_X3_B18:I20
CPC014_HA1E_6H_X3_F1B3_DUO52HI53LO:E05
CPC006_HA1E_6H_X3_B3_DUO52HI53LO:B17
CPC004_HA1E_6H_X2_B3_DUO52HI53LO:M10
HDAC002_HA1E_6H_X4_B7_DUO52HI53LO:J02
CPC010_HA1E_6H_X3_F1B3_DUO52HI53LO:J01
CPC014_HA1E_6H_X1_F1B3_DUO52HI53LO:J15
CPC019_HA1E_6H_X1_F1B3_DUO52HI53LO:M09
CPC001_HA1E_6H_X3_B3_DUO52HI53LO:E05
CPC005_HA1E_6H_X3_B3_DUO52HI53LO:A18
CPC006_HA1E_6H_X1_B3_DUO52HI53LO:F05
CPC001_HA1E_6H_X2_B3_DUO52HI53LO:N10
CPC001_HA1E_6H_X1_B3_DUO52HI53LO:E05
CPC009_HA1E_6H_X3_B4_DUO52HI53LO:J16
CPC006_HA1E_6H_X4_B4_DUO52HI53LO:F05
KTOX002_HPTEC_6H_X1_B18:A05
CPC010_HA1E_6H_X3_F1B3_DUO52HI53LO:M01
CPC002_HA1E_6H_X3_B3_DUO52HI53LO:E06
CPC010_HA1E_6H_X3_F1B3_DUO52HI53LO:O01
CPC010_HA1E_6H_X3_F1B3_DUO52HI53LO:K01
CPC019_HA1E_6H_X3_B4_DUO52HI53LO:F05
HDAC002_HA1E_6H_X4_B7_DUO52HI53LO:M01
KTOX002_HPTEC_6H_X2_B18:B05
KTOX002_HPTEC_6H_X3_B18:I23
CPC006_HA1E_6H_X3_B3_DUO52HI53LO:M09
CPC004_HA1E_6H_X3_B3_DUO52HI53LO:E05
CPC001_HA1E_6H_X3_B3_DUO52HI53LO:A18
KTOX002_HPTEC_6H_X2_B18:A09
KTOX002_HPTEC_6H_X2_B18:J17
CRCGN001_HA1E_6H_X3_F1B4_DUO52HI53LO:N22
CPC007_HA1E_6H_X3_B3_DUO52HI53LO:J01
HDAC002_HA1E_6H_X5_B7_DUO52HI53LO:K02
CPC013_HA1E_6H_X1_F1B3_DUO52HI53LO:B17
CPC014_HA1E_6H_X1_F1B3_DUO52HI53LO:M09
CPC001_HA1E_6H_X2_B3_DUO52HI53LO:B18
CPC004_HA1E_6H_X3_B3_DUO52HI53LO:E06
CPC004_HA1E_6H_X2_B3_DUO52HI53LO:B17
KTOX002_HPTEC_6H_X2_B18:B09
KTOX002_HPTEC_6H_X1_B18:A09
KTOX002_HPTEC_6H_X1_B18:B06
KTOX002_HPTEC_6H_X3_B18:I21
CPC020_HA1E_6H_X2_F1B3_DUO52HI53LO:N10
CPC010_HA1E_6H_X3_F1B3_DUO52HI53LO:I01
CPC013_HA1E_6H_X2_F1B3_DUO52HI53LO:A18
CPC019_HA1E_6H_X2_F1B3_DUO52HI53LO:J15
CPC009_HA1E_6H_X2_F1B3_DUO52HI53LO:B17
CPC006_HA1E_6H_X2_B3_DUO52HI53LO:F05
CPC004_HA1E_6H_X2_B3_DUO52HI53LO:I16
CPC005_HA1E_6H_X1_B3_DUO52HI53LO:M10
CPC007_HA1E_6H_X3_B3_DUO52HI53LO:O02
CPC006_HA1E_6H_X1_B3_DUO52HI53LO:A17
CPC006_HA1E_6H_X5_B4_DUO52HI53LO:N10
KTOX002_HPTEC_6H_X2_B18:J22
KTOX002_HPTEC_6H_X1_B18:J20
CPC006_HA1E_6H_X2_B3_DUO52HI53LO:N10
CPC006_HA1E_6H_X3_B3_DUO52HI53LO:M10
HDAC002_HA1E_6H_X4_B7_DUO52HI53LO:L02
CPC011_HA1E_6H_X3_F1B3_DUO52HI53LO:H02
CRCGN001_HA1E_6H_X3_F1B4_DUO52HI53LO:O21
CPC006_HA1E_6H_X2_B3_DUO52HI53LO:I16
CPC006_HA1E_6H_X4_B4_DUO52HI53LO:E06
KTOX002_HPTEC_6H_X3_B18:B09
CPC011_HA1E_6H_X3_F1B3_DUO52HI53LO:F01
CPC002_HA1E_6H_X2_B3_DUO52HI53LO:A17
CPC004_HA1E_6H_X2_B3_DUO52HI53LO:N10
CPC007_HA1E_6H_X2_B3_DUO52HI53LO:I01
CPC006_HA1E_6H_X3_B3_DUO52HI53LO:A17
HDAC002_HA1E_6H_X5_B7_DUO52HI53LO:J01
KTOX002_HPTEC_6H_X3_B18:B11
CPC013_HA1E_6H_X1_F1B3_DUO52HI53LO:M09
CPC020_HA1E_6H_X3_F1B3_DUO52HI53LO:E06
CPC009_HA1E_6H_X3_B4_DUO52HI53LO:F05
KTOX002_HPTEC_6H_X2_B18:A11
KTOX002_HPTEC_6H_X2_B18:B12
KTOX002_HPTEC_6H_X2_B18:A06
CPC007_HA1E_6H_X3_B3_DUO52HI53LO:N01
KTOX002_HPTEC_6H_X1_B18:B07
CPC014_HA1E_6H_X2_F1B3_DUO52HI53LO:J15
CPC020_HA1E_6H_X2_F1B3_DUO52HI53LO:E05
KTOX002_HPTEC_6H_X3_B18:I22
CPC009_HA1E_6H_X2_F1B3_DUO52HI53LO:N10
CPC012_HA1E_6H_X2_F1B3_DUO52HI53LO:I15
CPC009_HA1E_6H_X2_F1B3_DUO52HI53LO:B18
HDAC002_HA1E_6H_X4_B7_DUO52HI53LO:J01
KTOX002_HPTEC_6H_X2_B18:B06
CPC014_HA1E_6H_X2_F1B3_DUO52HI53LO:M09
CPC011_HA1E_6H_X1_F1B3_DUO52HI53LO:H01
CPC020_HA1E_6H_X2_F1B3_DUO52HI53LO:I15
CPC010_HA1E_6H_X3_F1B3_DUO52HI53LO:I02
CPC001_HA1E_6H_X2_B3_DUO52HI53LO:I16
CPC001_HA1E_6H_X3_B3_DUO52HI53LO:N10
KTOX002_HPTEC_6H_X1_B18:B12
KTOX002_HPTEC_6H_X3_B18:A05
CPC014_HA1E_6H_X1_F1B3_DUO52HI53LO:E06
CPC012_HA1E_6H_X1_F1B3_DUO52HI53LO:I16
CPC004_HA1E_6H_X1_B3_DUO52HI53LO:E06
CPC006_HA1E_6H_X2_B3_DUO52HI53LO:B18
CPC004_HA1E_6H_X2_B3_DUO52HI53LO:N09
CPC010_HA1E_6H_X2_B4_DUO52HI53LO:N01
CPC006_HA1E_6H_X4_B4_DUO52HI53LO:A17
CPC010_HA1E_6H_X2_B4_DUO52HI53LO:M01
CPC019_HA1E_6H_X2_F1B3_DUO52HI53LO:I16
CPC014_HA1E_6H_X3_F1B3_DUO52HI53LO:E06
CPC005_HA1E_6H_X1_B3_DUO52HI53LO:J15
CPC010_HA1E_6H_X2_B4_DUO52HI53LO:M02
KTOX002_HPTEC_6H_X2_B18:I20
CPC014_HA1E_6H_X1_F1B3_DUO52HI53LO:M10
CPC019_HA1E_6H_X1_F1B3_DUO52HI53LO:M10
CRCGN004_HA1E_6H_X6_F1B7_DUO52HI53LO:F06
CPC007_HA1E_6H_X1_B3_DUO52HI53LO:O02
CPC004_HA1E_6H_X3_B3_DUO52HI53LO:J16
CPC001_HA1E_6H_X3_B3_DUO52HI53LO:J16
CPC007_HA1E_6H_X1_B3_DUO52HI53LO:I01
KTOX002_HPTEC_6H_X3_B18:J21
CPC001_HA1E_6H_X1_B3_DUO52HI53LO:I16
KTOX002_HPTEC_6H_X2_B18:J24
KTOX002_HPTEC_6H_X3_B18:A09
CPC012_HA1E_6H_X1_F1B3_DUO52HI53LO:B18
CPC003_HA1E_6H_X2_B3_DUO52HI53LO:E06
CPC001_HA1E_6H_X2_B3_DUO52HI53LO:E06
CPC007_HA1E_6H_X1_B3_DUO52HI53LO:M01
HDAC002_HA1E_6H_X4_B7_DUO52HI53LO:M23
KTOX002_HPTEC_6H_X3_B18:J20
CPC019_HA1E_6H_X2_F1B3_DUO52HI53LO:A18
CPC012_HA1E_6H_X2_F1B3_DUO52HI53LO:J16
CPC009_HA1E_6H_X2_F1B3_DUO52HI53LO:J15
CPC014_HA1E_6H_X1_F1B3_DUO52HI53LO:A18
CPC006_HA1E_6H_X1_B3_DUO52HI53LO:M09
CPC003_HA1E_6H_X2_B3_DUO52HI53LO:B17
CPC003_HA1E_6H_X2_B3_DUO52HI53LO:E05
CPC020_HA1E_6H_X1_F1B3_DUO52HI53LO:A18
CPC012_HA1E_6H_X1_F1B3_DUO52HI53LO:E05
CPC014_HA1E_6H_X3_F1B3_DUO52HI53LO:F06
CPC002_HA1E_6H_X1_B3_DUO52HI53LO:J15
CPC009_HA1E_6H_X3_B4_DUO52HI53LO:I16
CPC004_HA1E_6H_X1_B3_DUO52HI53LO:I16
CPC006_HA1E_6H_X3_B3_DUO52HI53LO:I15
CPC003_HA1E_6H_X3_B3_DUO52HI53LO:J16
HDAC002_HA1E_6H_X4_B7_DUO52HI53LO:N23
CPC012_HA1E_6H_X3_F1B3_DUO52HI53LO:M09
CPC012_HA1E_6H_X2_F1B3_DUO52HI53LO:M09
CRCGN004_HA1E_6H_X6_F1B7_DUO52HI53LO:J16
CPC003_HA1E_6H_X2_B3_DUO52HI53LO:F05
CPC010_HA1E_6H_X2_B4_DUO52HI53LO:H02
KTOX002_HPTEC_6H_X1_B18:A12
CRCGN001_HA1E_6H_X3_F1B4_DUO52HI53LO:F05
CPC003_HA1E_6H_X3_B3_DUO52HI53LO:A18
CPC006_HA1E_6H_X5_B4_DUO52HI53LO:E05
HDAC002_HA1E_6H_X4_B7_DUO52HI53LO:H24
CPC010_HA1E_6H_X3_F1B3_DUO52HI53LO:J02
CRCGN001_HA1E_6H_X3_F1B4_DUO52HI53LO:M09
CRCGN004_HA1E_6H_X6_F1B7_DUO52HI53LO:B18
CPC001_HA1E_6H_X2_B3_DUO52HI53LO:M09
CPC004_HA1E_6H_X3_B3_DUO52HI53LO:I15
CPC004_HA1E_6H_X3_B3_DUO52HI53LO:M09
CPC004_HA1E_6H_X3_B3_DUO52HI53LO:A18
CPC001_HA1E_6H_X3_B3_DUO52HI53LO:B17
HDAC002_HA1E_6H_X5_B7_DUO52HI53LO:K01
KTOX002_HPTEC_6H_X3_B18:J24
HDAC002_HA1E_6H_X4_B7_DUO52HI53LO:D01
KTOX002_HPTEC_6H_X3_B18:B07
CPC012_HA1E_6H_X3_F1B3_DUO52HI53LO:F06
CPC013_HA1E_6H_X2_F1B3_DUO52HI53LO:N10
CPC012_HA1E_6H_X1_F1B3_DUO52HI53LO:J15
CPC012_HA1E_6H_X2_F1B3_DUO52HI53LO:N10
CPC002_HA1E_6H_X3_B3_DUO52HI53LO:N09
CPC004_HA1E_6H_X3_B3_DUO52HI53LO:F05
CPC005_HA1E_6H_X1_B3_DUO52HI53LO:N10
CPC019_HA1E_6H_X3_B4_DUO52HI53LO:N10
HDAC002_HA1E_6H_X4_B7_DUO52HI53LO:D02
CPC006_HA1E_6H_X3_B3_DUO52HI53LO:J04
CPC006_HA1E_6H_X4_B4_DUO52HI53LO:J04
CPC006_HA1E_6H_X2_B3_DUO52HI53LO:J04
CPC006_HA1E_6H_X1_B3_DUO52HI53LO:J04
CPC006_HA1E_6H_X5_B4_DUO52HI53LO:J04
CPC006_HA1E_6H_X3_B3_DUO52HI53LO:D06
CPC006_HA1E_6H_X2_B3_DUO52HI53LO:D06
CPC006_HA1E_6H_X4_B4_DUO52HI53LO:D06
CPC006_HA1E_6H_X5_B4_DUO52HI53LO:D06
CPC006_HA1E_6H_X1_B3_DUO52HI53LO:D06
CPC006_HA1E_24H_X2_B3_DUO52HI53LO:B24
CPC006_HA1E_24H_X1.A2_F1B3_DUO52HI53LO:B24
CPC006_HA1E_24H_X3_B3_DUO52HI53LO:B24
KTOX002_HPTEC_24H_X3_B18:I18
LUNG001_NL20_24H_X3_B18:C02
KTOX002_HPTEC_24H_X3_B18:I19
REP.A025_HA1E_24H_X3_B23:F07
REP.B026_HA1E_24H_X2_B23:J18
REP.B019_HA1E_24H_X1_B23:F10
REP.B024_HA1E_24H_X2_B23:A06
REP.B024_HA1E_24H_X1_B23:F08
REP.B017_HA1E_24H_X1_B23:J18
REP.A025_HA1E_24H_X2_B23:B03
LJP005_HA1E_24H_X1_B19:A03
LJP008_HA1E_24H_X1_B20:N22
PBIOA014_HA1E_24H_X3_B21:J17
PBIOA022_HA1E_24H_X2_B21:F12
PBIOA018_HA1E_24H_X3_B21:F08
PBIOA016_HA1E_24H_X3_B21:B03
PBIOA013_HA1E_24H_X1_B21:J17
REP.A004_HA1E_24H_X1_B22:J17
REP.B005_HA1E_24H_X1_B22:F12
REP.A016_HA1E_24H_X2_B23:B03
REP.B018_HA1E_24H_X1_B23:A05
REP.A022_HA1E_24H_X1_B23:J16
REP.A025_HA1E_24H_X3_B23:J18
MUC.CP008_HA1E_24H_X3_B34:A05
MUC.CP008_HA1E_24H_X1_B34:G15
CPC004_HA1E_24H_X1_B3_DUO52HI53LO:I15
CPC002_HA1E_24H_X2_B3_DUO52HI53LO:J15
CPC007_HA1E_24H_X2_B3_DUO52HI53LO:K01
CPC001_HA1E_24H_X3_B3_DUO52HI53LO:B17
LJP005_HA1E_24H_X3_B19:J16
LJP005_HA1E_24H_X3_B19:J15
PBIOA018_HA1E_24H_X3_B21:N19
REP.A004_HA1E_24H_X1_B22:J15
REP.B006_HA1E_24H_X2_B22:F12
DOSVAL004_HA1E_24H_X3_B19:A03
DOSVAL006_HA1E_24H_X2_B19:J17
PBIOA019_HA1E_24H_X1_B20:A03
LJP008_HA1E_24H_X3_B20:N22
PCL001_HA1E_24H_X2_B20:A05
PBIOA019_HA1E_24H_X2_B21:J16
PBIOA020_HA1E_24H_X1_B21:J15
PBIOA019_HA1E_24H_X3_B21:A04
PBIOA018_HA1E_24H_X3_B21:A06
REP.A005_HA1E_24H_X3_B22:F08
DOSVAL001_HA1E_24H_X3_B18:F07
LUNG001_NL20_24H_X1_B18:J02
REP.B024_HA1E_24H_X2_B23:A05
REP.B024_HA1E_24H_X1_B23:F07
REP.B010_HA1E_24H_X1_B23:B04
DOSVAL005_HA1E_24H_X2_B19:N22
DOSVAL005_HA1E_24H_X2_B19:F07
PBIOA018_HA1E_24H_X3_B21:J14
PBIOA019_HA1E_24H_X3_B21:N22
REP.A012_HA1E_24H_X1_B22:B05
REP.B009_HA1E_24H_X2_B22:J18
REP.B017_HA1E_24H_X2_B23:J15
REP.B024_HA1E_24H_X1_B23:A04
REP.A014_HA1E_24H_X1_B23:A06
MUC.CP008_HA1E_24H_X2_B34:G14
CPC007_HA1E_24H_X2_B3_DUO52HI53LO:E01
KTOX002_HPTEC_24H_X3_B18:B05
KTOX002_HPTEC_24H_X2_B18:B06
DOSVAL003_HA1E_24H_X1_B19:A05
LJP006_HA1E_24H_X2_B19:A04
PBIOA018_HA1E_24H_X2_B21:J14
PBIOA016_HA1E_24H_X2_B21:F09
PBIOA022_HA1E_24H_X3_B21:N22
PBIOA020_HA1E_24H_X1_B21:N19
REP.A003_HA1E_24H_X1_B22:B03
REP.A004_HA1E_24H_X2_B22:F11
REP.B005_HA1E_24H_X1_B22:F09
DOSVAL001_HA1E_24H_X3_B18:J15
LJP006_HA1E_24H_X1_B19:J17
DOSVAL004_HA1E_24H_X1_B19:N19
LJP005_HA1E_24H_X1_B19:N19
LJP008_HA1E_24H_X1_B20:J17
PBIOA018_HA1E_24H_X2_B21:N19
REP.B004_HA1E_24H_X3_B22:B05
REP.B003_HA1E_24H_X2_B22:B03
REP.B002_HA1E_24H_X2_B22:A06
DOSVAL001_HA1E_24H_X1_B18:A12
REP.A016_HA1E_24H_X1_B23:B06
REP.B026_HA1E_24H_X1_B23:F10
REP.A023_HA1E_24H_X2_B23:A03
REP.B019_HA1E_24H_X1_B23:B05
REP.B020_HA1E_24H_X1_B23:B06
REP.B022_HA1E_24H_X1_B23:J16
REP.B027_HA1E_24H_X1_B23:A05
LJP007_HA1E_24H_X3_B20:N19
PBIOA018_HA1E_24H_X2_B21:N24
PBIOA016_HA1E_24H_X2_B21:J13
REP.A004_HA1E_24H_X1_B22:F08
REP.A001_HA1E_24H_X2_B22:J18
REP.A014_HA1E_24H_X1_B23:J13
REP.A022_HA1E_24H_X1_B23:F10
REP.A028_HA1E_24H_X2_B25:B03
MUC.CP008_HA1E_24H_X1_B34:G17
LJP005_HA1E_24H_X3_B19:N19
DOSVAL002_HA1E_24H_X3_B19:B04
DOSVAL004_HA1E_24H_X2_B19:B05
DOSVAL002_HA1E_24H_X2_B19:F12
PBIOA018_HA1E_24H_X2_B21:N22
REP.A007_HA1E_24H_X1_B22:J16
REP.A004_HA1E_24H_X3_B22:A05
REP.A002_HA1E_24H_X2_B22:F09
REP.A002_HA1E_24H_X3_B22:A05
REP.B002_HA1E_24H_X2_B22:J18
DOSVAL002_HA1E_24H_X2_B19:A06
PBIOA019_HA1E_24H_X1_B20:B04
REP.B002_HA1E_24H_X1_B22:A06
REP.A005_HA1E_24H_X3_B22:J18
REP.B009_HA1E_24H_X1.A2_B23:J13
REP.A023_HA1E_24H_X1_B23:F12
REP.A018_HA1E_24H_X3_B23:F09
DOSVAL005_HA1E_24H_X3_B19:A06
DOSVAL006_HA1E_24H_X3_B19:J13
DOSVAL002_HA1E_24H_X2_B19:N24
LJP008_HA1E_24H_X1_B20:F11
PBIOA017_HA1E_24H_X3_B21:A06
PBIOA021_HA1E_24H_X3_B21:F08
PBIOA019_HA1E_24H_X3_B21:F07
PBIOA020_HA1E_24H_X3_B21:A04
REP.B009_HA1E_24H_X2_B22:F12
REP.B003_HA1E_24H_X1_B22:J17
REP.A007_HA1E_24H_X3_B22:J15
REP.B003_HA1E_24H_X2_B22:J16
REP.A028_HA1E_24H_X3_B25:A05
REP.A028_HA1E_24H_X3_B25:J17
REP.A022_HA1E_24H_X1_B23:B06
REP.B019_HA1E_24H_X1_B23:F07
REP.B014_HA1E_24H_X2_B23:A06
REP.B009_HA1E_24H_X1.A2_B23:J16
CPC002_HA1E_24H_X1_B3_DUO52HI53LO:N10
CPC003_HA1E_24H_X2_B3_DUO52HI53LO:J15
CPC005_HA1E_24H_X1_B3_DUO52HI53LO:I16
CPC006_HA1E_24H_X3_B3_DUO52HI53LO:I16
CPC001_HA1E_24H_X2_B3_DUO52HI53LO:A17
CPC007_HA1E_24H_X3_B3_DUO52HI53LO:K01
DOSVAL001_HA1E_24H_X1_B18:J16
KTOX002_HPTEC_24H_X3_B18:J17
LJP005_HA1E_24H_X3_B19:B05
LJP005_HA1E_24H_X3_B19:F10
PBIOA017_HA1E_24H_X2_B21:A05
PBIOA015_HA1E_24H_X1_B21:J13
PBIOA021_HA1E_24H_X2_B21:N20
PBIOA017_HA1E_24H_X2_B21:B03
PBIOA014_HA1E_24H_X3_B21:B03
PBIOA017_HA1E_24H_X2_B21:F07
PBIOA017_HA1E_24H_X2_B21:N21
REP.A012_HA1E_24H_X2_B22:F07
REP.B003_HA1E_24H_X3_B22:J13
REP.A003_HA1E_24H_X3_B22:B04
KTOX002_HPTEC_24H_X2_B18:I21
DOSVAL001_HA1E_24H_X3_B18:B05
REP.B026_HA1E_24H_X1_B23:B04
REP.A023_HA1E_24H_X1_B23:A05
REP.B011_HA1E_24H_X2_B23:B05
REP.A022_HA1E_24H_X3_B23:B06
REP.B018_HA1E_24H_X2_B23:F11
REP.A015_HA1E_24H_X3_B23:B04
REP.A020_HA1E_24H_X3_B23:B05
DOSVAL005_HA1E_24H_X3_B19:N24
DOSVAL006_HA1E_24H_X3_B19:F11
PBIOA016_HA1E_24H_X3_B21:F11
PBIOA018_HA1E_24H_X3_B21:J17
PBIOA015_HA1E_24H_X3_B21:J14
PBIOA015_HA1E_24H_X2_B21:N22
REP.A028_HA1E_24H_X1_B25:B05
REP.A026_HA1E_24H_X2_B25:B05
CPC007_HA1E_24H_X2_B3_DUO52HI53LO:N01
KTOX002_HPTEC_24H_X3_B18:B12
HDAC002_HA1E_24H_X1_B7_DUO52HI53LO:D02
DOSVAL002_HA1E_24H_X1_B19:N23
LJP006_HA1E_24H_X3_B19:J16
LJP006_HA1E_24H_X3_B19:J13
PBIOA016_HA1E_24H_X3_B21:N23
REP.B004_HA1E_24H_X3_B22:J15
DOSVAL001_HA1E_24H_X3_B18:N19
DOSVAL002_HA1E_24H_X1_B19:J13
DOSVAL003_HA1E_24H_X3_B19:F11
DOSVAL005_HA1E_24H_X3_B19:N22
LJP008_HA1E_24H_X3_B20:J14
REP.B005_HA1E_24H_X3_B22:J13
REP.A004_HA1E_24H_X3_B22:F07
REP.A015_HA1E_24H_X2_B23:F11
REP.A022_HA1E_24H_X3_B23:J18
REP.A024_HA1E_24H_X2_B23:J14
REP.B020_HA1E_24H_X2_B23:F10
REP.A015_HA1E_24H_X2_B23:A05
REP.A014_HA1E_24H_X1_B23:B06
REP.B019_HA1E_24H_X2_B23:B04
REP.A023_HA1E_24H_X3_B23:B05
REP.A009_HA1E_24H_X2_B24:F12
LJP005_HA1E_24H_X1_B19:N24
DOSVAL003_HA1E_24H_X1_B19:B06
LJP008_HA1E_24H_X1_B20:P19
REP.B005_HA1E_24H_X2_B22:B04
REP.B004_HA1E_24H_X2_B22:J16
REP.A003_HA1E_24H_X1_B22:J14
REP.B025_HA1E_24H_X2_B25:B06
REP.B021_HA1E_24H_X2_B23:F10
CPC003_HA1E_24H_X3_B3_DUO52HI53LO:A17
CPC006_HA1E_24H_X2_B3_DUO52HI53LO:I16
CPC004_HA1E_24H_X1_B3_DUO52HI53LO:B17
PCLB003_HA1E_24H_X1_B13:B06
LJP006_HA1E_24H_X1_B19:A06
PBIOA020_HA1E_24H_X1_B21:J18
PBIOA018_HA1E_24H_X1_B21:F11
PBIOA013_HA1E_24H_X3_B21:J16
REP.A001_HA1E_24H_X3_B22:F12
REP.B002_HA1E_24H_X1_B22:A04
REP.B008_HA1E_24H_X2_B22:J14
REP.B001_HA1E_24H_X2_B22:J18
LJP007_HA1E_24H_X3_B20:F08
PBIOA013_HA1E_24H_X1_B21:F09
PBIOA014_HA1E_24H_X3_B21:J14
PBIOA017_HA1E_24H_X2_B21:B05
REP.B003_HA1E_24H_X2_B22:J15
REP.B003_HA1E_24H_X1_B22:J14
REP.A014_HA1E_24H_X3_B23:F12
REP.A021_HA1E_24H_X3_B23:F12
REP.A023_HA1E_24H_X2_B23:A05
REP.A007_HA1E_24H_X2_B24:B05
REP.B009_HA1E_24H_X1.A2_B23:J18
REP.B022_HA1E_24H_X1_B23:B04
REP.B019_HA1E_24H_X1_B23:J15
REP.A014_HA1E_24H_X3_B23:A03
REP.A016_HA1E_24H_X2_B23:A03
DOSVAL002_HA1E_24H_X2_B19:F08
DOSVAL005_HA1E_24H_X1_B19:F08
PBIOA022_HA1E_24H_X1_B21:J14
PBIOA015_HA1E_24H_X2_B21:B03
PBIOA016_HA1E_24H_X3_B21:J13
PBIOA022_HA1E_24H_X1_B21:F12
REP.A005_HA1E_24H_X2_B22:J15
REP.B001_HA1E_24H_X2_B22:J15
REP.B011_HA1E_24H_X2_B23:F09
REP.B019_HA1E_24H_X1_B23:A05
REP.B014_HA1E_24H_X2_B23:J13
CRCGN004_HA1E_24H_X7_F1B7_DUO52HI53LO:M08
CPC004_HA1E_24H_X1_B3_DUO52HI53LO:J16
CPC007_HA1E_24H_X2_B3_DUO52HI53LO:J02
DOSVAL003_HA1E_24H_X3_B19:A04
PBIOA019_HA1E_24H_X3_B21:J14
REP.A003_HA1E_24H_X3_B22:J17
REP.A001_HA1E_24H_X3_B22:B04
REP.B001_HA1E_24H_X3_B22:F12
DOSVAL002_HA1E_24H_X3_B19:B05
DOSVAL006_HA1E_24H_X2_B19:N24
PCL001_HA1E_24H_X1_B20:N24
LJP007_HA1E_24H_X3_B20:N21
PBIOA015_HA1E_24H_X1_B21:J17
PBIOA019_HA1E_24H_X3_B21:F08
REP.A002_HA1E_24H_X3_B22:B06
REP.B005_HA1E_24H_X1_B22:F11
REP.B008_HA1E_24H_X2_B22:A05
REP.B028_HA1E_24H_X1_B23:F11
REP.A015_HA1E_24H_X1_B23:J15
REP.B026_HA1E_24H_X2_B23:F07
REP.B019_HA1E_24H_X2_B23:J17
REP.A006_HA1E_24H_X2_B24:J13
REP.B016_HA1E_24H_X2_B23:B03
REP.B028_HA1E_24H_X1_B23:A03
REP.A014_HA1E_24H_X2_B23:F12
DOSVAL005_HA1E_24H_X3_B19:B05
DOSVAL005_HA1E_24H_X2_B19:B06
PCL001_HA1E_24H_X3_B20:J13
PBIOA022_HA1E_24H_X1_B21:A06
REP.A001_HA1E_24H_X3_B22:F08
REP.B005_HA1E_24H_X3_B22:J15
REP.B003_HA1E_24H_X2_B22:J13
REP.B004_HA1E_24H_X3_B22:B03
REP.A012_HA1E_24H_X1_B22:F11
REP.B014_HA1E_24H_X1_B23:F12
REP.A022_HA1E_24H_X2.L2.A2_B23:F08
REP.B013_HA1E_24H_X2_B24:F11
REP.A010_HA1E_24H_X2_B24:A03
REP.A026_HA1E_24H_X2_B25:F10
CPC005_HA1E_24H_X3_B3_DUO52HI53LO:N10
CPC002_HA1E_24H_X2_B3_DUO52HI53LO:B17
CPC007_HA1E_24H_X2_B3_DUO52HI53LO:F01
CPC006_HA1E_24H_X2_B3_DUO52HI53LO:A17
CPC004_HA1E_24H_X1_B3_DUO52HI53LO:E06
KTOX002_HPTEC_24H_X3_B18:B09
PBIOA014_HA1E_24H_X3_B21:N24
PBIOA021_HA1E_24H_X3_B21:E10
PBIOA018_HA1E_24H_X2_B21:J15
REP.B005_HA1E_24H_X1_B22:B05
REP.B003_HA1E_24H_X2_B22:F08
PBIOA020_HA1E_24H_X1_B21:F08
PBIOA022_HA1E_24H_X1_B21:N24
REP.A005_HA1E_24H_X1_B22:F11
REP.B004_HA1E_24H_X1_B22:B03
REP.A015_HA1E_24H_X1_B23:F12
REP.B016_HA1E_24H_X1_B23:F09
REP.B018_HA1E_24H_X1_B23:A04
REP.A023_HA1E_24H_X3_B23:F09
REP.A011_HA1E_24H_X2_B24:F07
REP.B017_HA1E_24H_X2_B23:B03
REP.B027_HA1E_24H_X2_B23:F09
REP.A025_HA1E_24H_X1_B23:J13
REP.B028_HA1E_24H_X2_B23:B05
REP.A010_HA1E_24H_X2_B24:A05
PBIOA019_HA1E_24H_X1_B20:N20
PBIOA021_HA1E_24H_X1_B21:E07
PBIOA018_HA1E_24H_X1_B21:N22
PBIOA015_HA1E_24H_X3_B21:J17
PBIOA020_HA1E_24H_X3_B21:B03
REP.B002_HA1E_24H_X2_B22:F08
REP.A004_HA1E_24H_X2_B22:J15
REP.A004_HA1E_24H_X3_B22:J18
REP.B014_HA1E_24H_X2_B23:A03
REP.B016_HA1E_24H_X1_B23:B04
REP.B022_HA1E_24H_X1_B23:F09
REP.B016_HA1E_24H_X1_B23:J16
REP.A028_HA1E_24H_X1_B25:B03
CPC005_HA1E_24H_X1_B3_DUO52HI53LO:A18
HDAC002_HA1E_24H_X1_B7_DUO52HI53LO:N01
PCLB002_HA1E_24H_X2_B13:A06
HDAC002_HA1E_24H_X1_B7_DUO52HI53LO:J01
PCLB003_HA1E_24H_X1_B13:A05
DOSVAL005_HA1E_24H_X1_B19:A03
PBIOA015_HA1E_24H_X1_B21:B03
PBIOA016_HA1E_24H_X2_B21:A03
PBIOA022_HA1E_24H_X1_B21:F11
PBIOA018_HA1E_24H_X2_B21:J18
PBIOA020_HA1E_24H_X1_B21:B03
REP.A001_HA1E_24H_X3_B22:A06
REP.B005_HA1E_24H_X2_B22:B06
REP.B005_HA1E_24H_X1_B22:B03
DOSVAL004_HA1E_24H_X3_B19:F09
PBIOA020_HA1E_24H_X2_B21:J16
REP.A005_HA1E_24H_X2_B22:F12
PCLB003_HA1E_24H_X2_B13:A03
DOSVAL001_HA1E_24H_X1_B18:B05
DOSVAL001_HA1E_24H_X2_B18:B04
REP.A014_HA1E_24H_X2_B23:J16
REP.B022_HA1E_24H_X1_B23:J13
REP.B026_HA1E_24H_X1_B23:J17
REP.A014_HA1E_24H_X1_B23:B03
REP.A021_HA1E_24H_X2_B23:J15
REP.A024_HA1E_24H_X3_B23:J13
REP.A011_HA1E_24H_X2_B24:B04
REP.B018_HA1E_24H_X1_B23:J15
DOSVAL003_HA1E_24H_X1_B19:J13
PBIOA022_HA1E_24H_X1_B21:F10
PBIOA019_HA1E_24H_X2_B21:N20
REP.A001_HA1E_24H_X1_B22:B03
REP.A004_HA1E_24H_X2_B22:F12
REP.A002_HA1E_24H_X3_B22:A03
REP.A028_HA1E_24H_X1_B25:J16
REP.A024_HA1E_24H_X3_B23:F10
REP.B022_HA1E_24H_X2_B23:F08
REP.A023_HA1E_24H_X1_B23:F09
REP.A023_HA1E_24H_X1_B23:A06
CPC004_HA1E_24H_X3_B3_DUO52HI53LO:I15
CPC007_HA1E_24H_X3_B3_DUO52HI53LO:I02
CPC001_HA1E_24H_X1_B3_DUO52HI53LO:N10
CPC006_HA1E_24H_X3_B3_DUO52HI53LO:F06
DOSVAL002_HA1E_24H_X3_B19:F09
PBIOA021_HA1E_24H_X2_B21:F10
PBIOA017_HA1E_24H_X2_B21:J15
PBIOA018_HA1E_24H_X1_B21:B03
REP.B006_HA1E_24H_X2_B22:A05
KTOX002_HPTEC_24H_X3_B18:B10
PBIOA021_HA1E_24H_X1_B21:A05
PBIOA020_HA1E_24H_X2_B21:F10
PBIOA021_HA1E_24H_X1_B21:N20
REP.A003_HA1E_24H_X1_B22:B06
REP.B002_HA1E_24H_X1_B22:B06
REP.A007_HA1E_24H_X3_B22:F12
REP.A015_HA1E_24H_X3_B23:F10
REP.A022_HA1E_24H_X3_B23:J14
REP.A017_HA1E_24H_X2_B23:J17
REP.B020_HA1E_24H_X2_B23:B03
REP.A018_HA1E_24H_X2_B23:A06
REP.A024_HA1E_24H_X1_B23:F07
REP.A017_HA1E_24H_X3_B23:F12
PCL001_HA1E_24H_X2_B20:N22
PBIOA020_HA1E_24H_X2_B21:B06
PBIOA021_HA1E_24H_X3_B21:B04
REP.B004_HA1E_24H_X1_B22:F08
REP.B003_HA1E_24H_X3_B22:J14
REP.A001_HA1E_24H_X3_B22:B03
REP.B001_HA1E_24H_X2_B22:F09
REP.A002_HA1E_24H_X1_B22:B05
REP.A015_HA1E_24H_X1_B23:J16
REP.A022_HA1E_24H_X3_B23:F09
REP.A015_HA1E_24H_X3_B23:F07
REP.B010_HA1E_24H_X1_B23:F07
REP.A024_HA1E_24H_X1_B23:J15
REP.A026_HA1E_24H_X1_B25:J13
MUC.CP008_HA1E_24H_X2_B34:C22
MUC.CP008_HA1E_24H_X2_B34:C23
CPC003_HA1E_24H_X3_B3_DUO52HI53LO:B18
CPC005_HA1E_24H_X1_B3_DUO52HI53LO:J15
LUNG001_NL20_24H_X3_B18:F02
PBIOA019_HA1E_24H_X2_B21:N21
REP.A002_HA1E_24H_X1_B22:F07
REP.B003_HA1E_24H_X2_B22:A06
DOSVAL004_HA1E_24H_X2_B19:F11
DOSVAL006_HA1E_24H_X3_B19:F08
DOSVAL006_HA1E_24H_X2_B19:F11
DOSVAL004_HA1E_24H_X3_B19:J17
PBIOA019_HA1E_24H_X3_B21:B06
REP.A012_HA1E_24H_X1_B22:F12
REP.B020_HA1E_24H_X1_B23:J18
REP.A021_HA1E_24H_X2_B23:A03
REP.A021_HA1E_24H_X3_B23:F07
REP.B021_HA1E_24H_X1_B23:F08
REP.A021_HA1E_24H_X3_B23:J15
REP.A017_HA1E_24H_X3_B23:A03
REP.A011_HA1E_24H_X3_B24:F10
REP.A024_HA1E_24H_X3_B23:J16
REP.B023_HA1E_24H_X2_B23:B05
REP.A017_HA1E_24H_X1_B23:J14
REP.B014_HA1E_24H_X1_B23:J17
REP.B024_HA1E_24H_X1_B23:F09
LJP006_HA1E_24H_X2_B19:A06
PCL001_HA1E_24H_X1_B20:J17
PBIOA014_HA1E_24H_X2_B21:A04
PBIOA022_HA1E_24H_X1_B21:B06
PBIOA020_HA1E_24H_X3_B21:J16
REP.B006_HA1E_24H_X1_B22:J16
REP.A003_HA1E_24H_X2_B22:J18
REP.B004_HA1E_24H_X2_B22:F08
REP.A001_HA1E_24H_X2_B22:J16
REP.A005_HA1E_24H_X2_B22:A05
REP.A003_HA1E_24H_X1_B22:B04
REP.A005_HA1E_24H_X1_B22:J18
REP.B014_HA1E_24H_X2_B23:F10
REP.A024_HA1E_24H_X2_B23:B04
REP.A022_HA1E_24H_X3_B23:F07
REP.A024_HA1E_24H_X3_B23:B05
REP.B013_HA1E_24H_X1_B24:B05
MUC.CP008_HA1E_24H_X1_B34:A03
MUC.CP008_HA1E_24H_X1_B34:G14
MUC.CP008_HA1E_24H_X3_B34:C20
CPC002_HA1E_24H_X3_B3_DUO52HI53LO:B17
CPC003_HA1E_24H_X3_B3_DUO52HI53LO:F05
KTOX002_HPTEC_24H_X1_B18:B07
LJP006_HA1E_24H_X1_B19:N24
PBIOA019_HA1E_24H_X1_B20:B03
LJP007_HA1E_24H_X1_B20:N23
REP.B004_HA1E_24H_X2_B22:A03
REP.A004_HA1E_24H_X1_B22:A06
PBIOA015_HA1E_24H_X1_B21:F09
PBIOA022_HA1E_24H_X1_B21:B05
PBIOA013_HA1E_24H_X3_B21:N23
PBIOA021_HA1E_24H_X3_B21:E09
PBIOA022_HA1E_24H_X1_B21:J13
REP.A001_HA1E_24H_X3_B22:J13
DOSVAL001_HA1E_24H_X3_B18:A05
REP.A014_HA1E_24H_X1_B23:J18
REP.A023_HA1E_24H_X2_B23:F10
REP.B011_HA1E_24H_X1_B23:B03
REP.B012_HA1E_24H_X2_B24:A03
REP.B017_HA1E_24H_X2_B23:J14
REP.A017_HA1E_24H_X3_B23:J17
REP.B020_HA1E_24H_X2_B23:J14
REP.A024_HA1E_24H_X1_B23:J13
REP.A015_HA1E_24H_X1_B23:F10
LJP005_HA1E_24H_X3_B19:J18
LJP005_HA1E_24H_X2_B19:F09
DOSVAL006_HA1E_24H_X3_B19:B06
DOSVAL006_HA1E_24H_X3_B19:F09
LJP007_HA1E_24H_X3_B20:B05
PBIOA018_HA1E_24H_X1_B21:J18
REP.A003_HA1E_24H_X3_B22:F07
REP.B004_HA1E_24H_X2_B22:B03
REP.A028_HA1E_24H_X3_B25:B03
REP.B024_HA1E_24H_X2_B23:J18
REP.B010_HA1E_24H_X2_B23:A04
REP.B016_HA1E_24H_X2_B23:F10
REP.B009_HA1E_24H_X1.A2_B23:B03
REP.A018_HA1E_24H_X3_B23:J17
CPC001_HA1E_24H_X2_B3_DUO52HI53LO:F06
CPC006_HA1E_24H_X2_B3_DUO52HI53LO:J16
CPC007_HA1E_24H_X3_B3_DUO52HI53LO:J02
HDAC002_HA1E_24H_X1_B7_DUO52HI53LO:M01
DOSVAL001_HA1E_24H_X2_B18:F08
DOSVAL006_HA1E_24H_X3_B19:N24
PCL001_HA1E_24H_X1_B20:F07
PCL001_HA1E_24H_X1_B20:B05
PBIOA017_HA1E_24H_X2_B21:F09
REP.B006_HA1E_24H_X2_B22:F08
REP.A004_HA1E_24H_X2_B22:J16
REP.B003_HA1E_24H_X1_B22:A04
REP.B005_HA1E_24H_X3_B22:F11
REP.B009_HA1E_24H_X2_B22:F10
REP.A005_HA1E_24H_X2_B22:F09
REP.B002_HA1E_24H_X3_B22:J15
DOSVAL001_HA1E_24H_X3_B18:F11
PBIOA016_HA1E_24H_X3_B21:F12
PBIOA020_HA1E_24H_X2_B21:A06
REP.B005_HA1E_24H_X2_B22:F12
REP.A014_HA1E_24H_X1_B23:F08
REP.A023_HA1E_24H_X2_B23:F09
REP.B018_HA1E_24H_X1_B23:A06
REP.B024_HA1E_24H_X1_B23:J14
REP.A024_HA1E_24H_X2_B23:J18
REP.A021_HA1E_24H_X3_B23:J13
REP.A017_HA1E_24H_X3_B23:F10
REP.B024_HA1E_24H_X1_B23:F12
REP.A015_HA1E_24H_X2_B23:J17
DOSVAL002_HA1E_24H_X3_B19:N19
DOSVAL005_HA1E_24H_X1_B19:B05
PBIOA019_HA1E_24H_X3_B21:B04
REP.A002_HA1E_24H_X2_B22:B04
REP.A001_HA1E_24H_X1_B22:F11
REP.A022_HA1E_24H_X2.L2.A2_B23:F07
REP.B020_HA1E_24H_X1_B23:B05
REP.B022_HA1E_24H_X1_B23:B06
REP.A023_HA1E_24H_X1_B23:J14
REP.A025_HA1E_24H_X1_B23:B06
CPC001_HA1E_24H_X1_B3_DUO52HI53LO:M10
CPC006_HA1E_24H_X2_B3_DUO52HI53LO:E05
CPC001_HA1E_24H_X1_B3_DUO52HI53LO:B17
KTOX002_HPTEC_24H_X3_B18:B11
LJP006_HA1E_24H_X3_B19:F10
DOSVAL004_HA1E_24H_X2_B19:N23
PBIOA021_HA1E_24H_X2_B21:F08
PBIOA020_HA1E_24H_X1_B21:N20
DOSVAL001_HA1E_24H_X2_B18:F10
DOSVAL003_HA1E_24H_X2_B19:A04
LJP005_HA1E_24H_X3_B19:A04
LJP006_HA1E_24H_X2_B19:A03
DOSVAL006_HA1E_24H_X3_B19:N23
LJP008_HA1E_24H_X3_B20:F12
LJP008_HA1E_24H_X3_B20:J18
PBIOA013_HA1E_24H_X1_B21:A05
PBIOA017_HA1E_24H_X3_B21:A03
PBIOA020_HA1E_24H_X2_B21:F11
PBIOA015_HA1E_24H_X1_B21:B04
PBIOA013_HA1E_24H_X1_B21:N22
PBIOA017_HA1E_24H_X2_B21:N23
REP.A012_HA1E_24H_X3_B22:A05
KTOX002_HPTEC_24H_X1_B18:A10
REP.B023_HA1E_24H_X2_B23:F09
REP.A020_HA1E_24H_X2_B23:A06
REP.B023_HA1E_24H_X1_B23:B05
REP.B024_HA1E_24H_X2_B23:F10
REP.A023_HA1E_24H_X3_B23:J14
REP.A024_HA1E_24H_X2_B23:F09
REP.A022_HA1E_24H_X3_B23:B04
DOSVAL006_HA1E_24H_X3_B19:N22
DOSVAL002_HA1E_24H_X1_B19:J17
LJP008_HA1E_24H_X3_B20:P20
PCL001_HA1E_24H_X1_B20:F08
PBIOA019_HA1E_24H_X2_B21:J17
PBIOA021_HA1E_24H_X2_B21:B04
REP.A005_HA1E_24H_X1_B22:A04
REP.B005_HA1E_24H_X1_B22:F10
REP.B009_HA1E_24H_X2_B22:A03
REP.B028_HA1E_24H_X2_B23:F11
REP.A016_HA1E_24H_X1_B23:F10
REP.B028_HA1E_24H_X1_B23:A04
CPC006_HA1E_24H_X1.A2_F1B3_DUO52HI53LO:F06
CPC007_HA1E_24H_X1_B3_DUO52HI53LO:J02
CPC003_HA1E_24H_X1_B3_DUO52HI53LO:N10
CPC007_HA1E_24H_X2_B3_DUO52HI53LO:O02
CPC003_HA1E_24H_X3_B3_DUO52HI53LO:J15
LJP005_HA1E_24H_X3_B19:F11
DOSVAL003_HA1E_24H_X1_B19:A03
PCL001_HA1E_24H_X2_B20:J17
PBIOA019_HA1E_24H_X2_B21:B03
PBIOA022_HA1E_24H_X3_B21:F10
PBIOA013_HA1E_24H_X1_B21:A06
PBIOA020_HA1E_24H_X3_B21:B04
PBIOA020_HA1E_24H_X3_B21:J14
REP.A001_HA1E_24H_X2_B22:B05
REP.A002_HA1E_24H_X2_B22:A06
REP.B004_HA1E_24H_X3_B22:J16
REP.A001_HA1E_24H_X2_B22:A05
LUNG001_NL20_24H_X3_B18:F24
LUNG001_NL20_24H_X1_B18:H24
DOSVAL001_HA1E_24H_X2_B18:N19
LJP005_HA1E_24H_X2_B19:A03
PCL001_HA1E_24H_X2_B20:A06
REP.A007_HA1E_24H_X3_B22:F07
REP.A012_HA1E_24H_X2_B22:A04
KTOX002_HPTEC_24H_X3_B18:I20
REP.A022_HA1E_24H_X2.L2.A2_B23:J13
REP.A015_HA1E_24H_X2_B23:B06
REP.A025_HA1E_24H_X2_B23:B06
REP.B024_HA1E_24H_X1_B23:B03
REP.B027_HA1E_24H_X2_B23:B06
REP.B010_HA1E_24H_X2_B23:B05
REP.B011_HA1E_24H_X2_B23:B03
REP.A025_HA1E_24H_X2_B23:F10
REP.B014_HA1E_24H_X1_B23:A04
REP.B020_HA1E_24H_X2_B23:J17
REP.B019_HA1E_24H_X2_B23:A04
REP.B028_HA1E_24H_X2_B23:A06
REP.A020_HA1E_24H_X2_B23:F07
DOSVAL003_HA1E_24H_X1_B19:F12
PCL001_HA1E_24H_X2_B20:J15
PCL001_HA1E_24H_X3_B20:F07
REP.A012_HA1E_24H_X2_B22:F10
REP.B006_HA1E_24H_X1_B22:F09
REP.A007_HA1E_24H_X3_B22:B04
REP.A024_HA1E_24H_X3_B23:F12
REP.B017_HA1E_24H_X2_B23:J17
REP.B023_HA1E_24H_X1_B23:B04
REP.B022_HA1E_24H_X1_B23:B05
REP.A018_HA1E_24H_X2_B23:B04
REP.A025_HA1E_24H_X1_B23:A06
REP.B010_HA1E_24H_X2_B23:F12
REP.B020_HA1E_24H_X2_B23:B06
REP.B023_HA1E_24H_X1_B23:J15
MUC.CP008_HA1E_24H_X1_B34:C22
CRCGN004_HA1E_24H_X6_F1B7_DUO52HI53LO:J16
CPC006_HA1E_24H_X2_B3_DUO52HI53LO:N09
PCLB003_HA1E_24H_X3_B13:B03
DOSVAL004_HA1E_24H_X1_B19:J15
LJP005_HA1E_24H_X3_B19:F09
DOSVAL002_HA1E_24H_X2_B19:A03
LJP008_HA1E_24H_X3_B20:A05
LJP008_HA1E_24H_X3_B20:B06
REP.B001_HA1E_24H_X2_B22:F12
REP.B001_HA1E_24H_X2_B22:B04
KTOX002_HPTEC_24H_X2_B18:J17
DOSVAL006_HA1E_24H_X3_B19:A03
PBIOA021_HA1E_24H_X1_B21:J16
PBIOA014_HA1E_24H_X3_B21:A05
PBIOA013_HA1E_24H_X1_B21:B03
REP.B005_HA1E_24H_X2_B22:A06
REP.B002_HA1E_24H_X2_B22:A03
REP.A005_HA1E_24H_X2_B22:A06
REP.B002_HA1E_24H_X1_B22:J15
REP.B003_HA1E_24H_X3_B22:F12
REP.A007_HA1E_24H_X1_B22:B05
REP.B003_HA1E_24H_X3_B22:J17
KTOX002_HPTEC_24H_X1_B18:B08
REP.A014_HA1E_24H_X1_B23:F10
REP.B017_HA1E_24H_X1_B23:B06
REP.A017_HA1E_24H_X1_B23:B06
REP.A019_HA1E_24H_X2_B24:F10
REP.B014_HA1E_24H_X2_B23:B04
REP.A016_HA1E_24H_X1_B23:F07
REP.B017_HA1E_24H_X2_B23:F11
REP.B027_HA1E_24H_X1_B23:J15
REP.B015_HA1E_24H_X2_B23:A06
REP.B017_HA1E_24H_X1_B23:F12
REP.A016_HA1E_24H_X1_B23:F08
DOSVAL005_HA1E_24H_X2_B19:J18
DOSVAL002_HA1E_24H_X1_B19:F12
DOSVAL003_HA1E_24H_X1_B19:N20
LJP006_HA1E_24H_X1_B19:F09
LJP008_HA1E_24H_X1_B20:P24
PBIOA017_HA1E_24H_X1_B21:A05
PBIOA018_HA1E_24H_X1_B21:N21
PBIOA017_HA1E_24H_X3_B21:A05
PBIOA017_HA1E_24H_X2_B21:A03
REP.A003_HA1E_24H_X3_B22:J15
REP.A003_HA1E_24H_X1_B22:F11
REP.B005_HA1E_24H_X2_B22:J15
REP.A014_HA1E_24H_X3_B23:A04
REP.B027_HA1E_24H_X1_B23:B03
CPC005_HA1E_24H_X3_B3_DUO52HI53LO:I15
CPC006_HA1E_24H_X3_B3_DUO52HI53LO:J15
KTOX002_HPTEC_24H_X3_B18:I23
LUNG001_NL20_24H_X1_B18:J24
DOSVAL006_HA1E_24H_X2_B19:N20
DOSVAL006_HA1E_24H_X2_B19:B05
PCL001_HA1E_24H_X3_B20:N19
PBIOA018_HA1E_24H_X1_B21:A05
REP.A012_HA1E_24H_X3_B22:J15
REP.B008_HA1E_24H_X2_B22:F11
REP.B006_HA1E_24H_X2_B22:F10
LJP005_HA1E_24H_X3_B19:A05
DOSVAL002_HA1E_24H_X1_B19:A06
PBIOA015_HA1E_24H_X2_B21:J17
PBIOA018_HA1E_24H_X3_B21:B05
PBIOA018_HA1E_24H_X2_B21:F09
PBIOA016_HA1E_24H_X1_B21:F09
REP.B002_HA1E_24H_X1_B22:F09
REP.B004_HA1E_24H_X3_B22:A03
REP.A005_HA1E_24H_X2_B22:B03
REP.A001_HA1E_24H_X1_B22:B04
PCLB003_HA1E_24H_X1_B13:A06
LUNG001_NL20_24H_X1_B18:G24
REP.A016_HA1E_24H_X2_B23:J16
REP.A024_HA1E_24H_X3_B23:F08
REP.A024_HA1E_24H_X1_B23:A04
REP.B011_HA1E_24H_X1_B23:J18
REP.A023_HA1E_24H_X3_B23:J15
REP.B015_HA1E_24H_X2_B23:B03
REP.B024_HA1E_24H_X2_B23:J14
REP.A020_HA1E_24H_X2_B23:A03
REP.B011_HA1E_24H_X1_B23:F12
REP.A017_HA1E_24H_X3_B23:J15
REP.B011_HA1E_24H_X1_B23:J15
LJP006_HA1E_24H_X3_B19:J17
DOSVAL004_HA1E_24H_X1_B19:F09
REP.B008_HA1E_24H_X1_B22:B06
REP.B004_HA1E_24H_X2_B22:J17
REP.A026_HA1E_24H_X1_B25:A03
REP.A028_HA1E_24H_X1_B25:J14
REP.A017_HA1E_24H_X1_B23:J15
REP.A010_HA1E_24H_X2_B24:B04
MUC.CP008_HA1E_24H_X3_B34:B05
CPC007_HA1E_24H_X1_B3_DUO52HI53LO:L01
CPC004_HA1E_24H_X1_B3_DUO52HI53LO:F05
DOSVAL003_HA1E_24H_X2_B19:N19
LJP005_HA1E_24H_X3_B19:N24
LJP005_HA1E_24H_X3_B19:J14
PBIOA017_HA1E_24H_X1_B21:F12
PBIOA015_HA1E_24H_X2_B21:N19
REP.A002_HA1E_24H_X3_B22:J15
REP.A012_HA1E_24H_X3_B22:J13
DOSVAL006_HA1E_24H_X3_B19:B04
LJP008_HA1E_24H_X1_B20:B05
PCL001_HA1E_24H_X3_B20:N24
LJP008_HA1E_24H_X1_B20:F07
PBIOA019_HA1E_24H_X1_B20:N23
PBIOA020_HA1E_24H_X3_B21:F12
PBIOA021_HA1E_24H_X1_B21:A03
REP.B001_HA1E_24H_X2_B22:F11
KTOX002_HPTEC_24H_X2_B18:I24
REP.A015_HA1E_24H_X2_B23:J15
REP.A016_HA1E_24H_X2_B23:J14
REP.B027_HA1E_24H_X2_B23:J16
REP.B020_HA1E_24H_X1_B23:B03
REP.B010_HA1E_24H_X2_B23:F09
REP.B018_HA1E_24H_X2_B23:F07
REP.B011_HA1E_24H_X2_B23:F11
REP.A009_HA1E_24H_X2_B24:J14
LJP007_HA1E_24H_X1_B20:N19
PBIOA020_HA1E_24H_X3_B21:A06
PBIOA014_HA1E_24H_X2_B21:F09
REP.B008_HA1E_24H_X1_B22:A04
REP.B008_HA1E_24H_X2_B22:F12
REP.B018_HA1E_24H_X1_B23:A03
REP.A019_HA1E_24H_X1_B23:J18
REP.B026_HA1E_24H_X2_B23:J16
REP.A016_HA1E_24H_X2_B23:B06
CPC007_HA1E_24H_X2_B3_DUO52HI53LO:K02
CPC004_HA1E_24H_X2_B3_DUO52HI53LO:B18
LJP006_HA1E_24H_X3_B19:F11
LJP008_HA1E_24H_X3_B20:F11
PBIOA021_HA1E_24H_X1_B21:N23
REP.A005_HA1E_24H_X2_B22:J17
LUNG001_NL20_24H_X3_B18:N02
DOSVAL001_HA1E_24H_X1_B18:G02
DOSVAL006_HA1E_24H_X2_B19:A06
LJP009_HA1E_24H_X3_B20:N22
PCL001_HA1E_24H_X1_B20:J15
PBIOA016_HA1E_24H_X1_B21:N19
PBIOA021_HA1E_24H_X3_B21:A04
REP.A003_HA1E_24H_X3_B22:F12
REP.B004_HA1E_24H_X2_B22:B04
REP.A003_HA1E_24H_X1_B22:F10
REP.B026_HA1E_24H_X1_B23:J16
REP.A020_HA1E_24H_X2_B23:J15
REP.B022_HA1E_24H_X2_B23:B06
REP.A021_HA1E_24H_X1_B23:A04
REP.B023_HA1E_24H_X2_B23:A04
REP.B015_HA1E_24H_X2_B23:J17
REP.B022_HA1E_24H_X1_B23:J15
REP.A016_HA1E_24H_X3_B23:F07
REP.A022_HA1E_24H_X3_B23:A04
DOSVAL005_HA1E_24H_X2_B19:B05
DOSVAL004_HA1E_24H_X1_B19:F12
DOSVAL004_HA1E_24H_X3_B19:N21
DOSVAL004_HA1E_24H_X1_B19:A03
PBIOA022_HA1E_24H_X2_B21:N24
PBIOA018_HA1E_24H_X1_B21:B06
PBIOA022_HA1E_24H_X2_B21:N20
REP.A005_HA1E_24H_X1_B22:F09
REP.B022_HA1E_24H_X2_B23:A06
REP.B014_HA1E_24H_X1_B23:F08
REP.B015_HA1E_24H_X1_B23:A05
REP.A015_HA1E_24H_X3_B23:F12
REP.A016_HA1E_24H_X3_B23:J18
REP.B019_HA1E_24H_X2_B23:J18
REP.B022_HA1E_24H_X2_B23:J14
CRCGN004_HA1E_24H_X6_F1B7_DUO52HI53LO:M08
CPC001_HA1E_24H_X2_B3_DUO52HI53LO:J16
CPC007_HA1E_24H_X3_B3_DUO52HI53LO:O01
DOSVAL001_HA1E_24H_X2_B18:N20
KTOX002_HPTEC_24H_X1_B18:B09
LJP005_HA1E_24H_X2_B19:B04
PCL001_HA1E_24H_X2_B20:F07
PBIOA017_HA1E_24H_X1_B21:A06
PBIOA015_HA1E_24H_X1_B21:J14
REP.A012_HA1E_24H_X1_B22:J15
REP.A004_HA1E_24H_X1_B22:B03
REP.A005_HA1E_24H_X3_B22:F07
REP.A001_HA1E_24H_X1_B22:A05
REP.B006_HA1E_24H_X1_B22:F07
REP.B004_HA1E_24H_X2_B22:J13
DOSVAL003_HA1E_24H_X3_B19:A03
DOSVAL003_HA1E_24H_X1_B19:N24
PCL001_HA1E_24H_X3_B20:N23
LJP008_HA1E_24H_X3_B20:J16
LJP009_HA1E_24H_X3_B20:J15
PBIOA013_HA1E_24H_X1_B21:N20
PBIOA019_HA1E_24H_X3_B21:J18
PBIOA019_HA1E_24H_X2_B21:B05
REP.B004_HA1E_24H_X1_B22:F11
REP.A012_HA1E_24H_X3_B22:J16
REP.A002_HA1E_24H_X2_B22:F12
KTOX002_HPTEC_24H_X1_B18:I22
REP.B018_HA1E_24H_X2_B23:J17
REP.A024_HA1E_24H_X2_B23:J13
REP.A014_HA1E_24H_X1_B23:F09
REP.B020_HA1E_24H_X1_B23:F08
REP.B017_HA1E_24H_X2_B23:F12
LJP006_HA1E_24H_X1_B19:J15
LJP006_HA1E_24H_X3_B19:F08
LJP007_HA1E_24H_X1_B20:N22
PBIOA021_HA1E_24H_X1_B21:N21
REP.B005_HA1E_24H_X3_B22:F12
REP.B026_HA1E_24H_X1_B23:F08
REP.A023_HA1E_24H_X3_B23:J13
REP.A014_HA1E_24H_X3_B23:J18
REP.B016_HA1E_24H_X2_B23:J18
REP.B022_HA1E_24H_X2_B23:J17
REP.A023_HA1E_24H_X3_B23:J18
MUC.CP008_HA1E_24H_X1_B34:C20
MUC.CP008_HA1E_24H_X1_B34:B06
MUC.CP008_HA1E_24H_X3_B34:A03
CPC004_HA1E_24H_X1_B3_DUO52HI53LO:N09
CPC005_HA1E_24H_X2_B3_DUO52HI53LO:M09
CPC007_HA1E_24H_X2_B3_DUO52HI53LO:I01
CPC007_HA1E_24H_X2_B3_DUO52HI53LO:N02
KTOX002_HPTEC_24H_X1_B18:B05
PBIOA016_HA1E_24H_X2_B21:B05
PBIOA016_HA1E_24H_X1_B21:A03
PBIOA015_HA1E_24H_X1_B21:J16
REP.B001_HA1E_24H_X2_B22:B05
REP.B006_HA1E_24H_X2_B22:J17
REP.B003_HA1E_24H_X1_B22:A03
REP.B006_HA1E_24H_X1_B22:B06
LJP008_HA1E_24H_X1_B20:F10
PBIOA013_HA1E_24H_X3_B21:B06
PBIOA017_HA1E_24H_X1_B21:B05
PBIOA014_HA1E_24H_X2_B21:N20
REP.A003_HA1E_24H_X2_B22:F10
REP.A012_HA1E_24H_X2_B22:J18
REP.B002_HA1E_24H_X2_B22:F12
DOSVAL001_HA1E_24H_X1_B18:J14
REP.A017_HA1E_24H_X1_B23:A04
REP.A016_HA1E_24H_X2_B23:J15
REP.B016_HA1E_24H_X2_B23:J16
REP.A017_HA1E_24H_X1_B23:A05
REP.B016_HA1E_24H_X1_B23:F11
REP.B017_HA1E_24H_X1_B23:F07
REP.A019_HA1E_24H_X2_B24:J13
REP.A021_HA1E_24H_X1_B23:B03
REP.B020_HA1E_24H_X2_B23:F12
REP.A023_HA1E_24H_X3_B23:F10
REP.B021_HA1E_24H_X2_B23:A04
REP.A016_HA1E_24H_X1_B23:J13
LJP006_HA1E_24H_X2_B19:F12
LJP008_HA1E_24H_X3_B20:P21
PBIOA020_HA1E_24H_X3_B21:A05
REP.B002_HA1E_24H_X3_B22:B04
REP.B005_HA1E_24H_X3_B22:F09
REP.B010_HA1E_24H_X1_B23:J15
REP.A022_HA1E_24H_X1_B23:J14
REP.B013_HA1E_24H_X1_B24:A06
MUC.CP008_HA1E_24H_X1_B34:C23
CPC002_HA1E_24H_X2_B3_DUO52HI53LO:M09
CPC003_HA1E_24H_X3_B3_DUO52HI53LO:F06
CPC005_HA1E_24H_X2_B3_DUO52HI53LO:I15
CPC007_HA1E_24H_X3_B3_DUO52HI53LO:J01
KTOX002_HPTEC_24H_X1_B18:J19
DOSVAL006_HA1E_24H_X3_B19:J18
LJP007_HA1E_24H_X1_B20:F10
LJP008_HA1E_24H_X3_B20:A06
LJP009_HA1E_24H_X3_B20:J16
PBIOA020_HA1E_24H_X2_B21:B04
PBIOA015_HA1E_24H_X1_B21:B05
PBIOA015_HA1E_24H_X2_B21:J18
REP.A002_HA1E_24H_X2_B22:B05
REP.B004_HA1E_24H_X3_B22:F09
REP.A004_HA1E_24H_X2_B22:B05
LJP006_HA1E_24H_X1_B19:J18
DOSVAL004_HA1E_24H_X1_B19:B05
LJP008_HA1E_24H_X1_B20:J14
PBIOA022_HA1E_24H_X2_B21:B06
PBIOA022_HA1E_24H_X3_B21:J14
REP.A004_HA1E_24H_X1_B22:F07
REP.B002_HA1E_24H_X3_B22:B05
REP.A005_HA1E_24H_X1_B22:A05
REP.A007_HA1E_24H_X1_B22:J17
PCLB003_HA1E_24H_X2_B13:A06
DOSVAL001_HA1E_24H_X3_B18:A12
DOSVAL001_HA1E_24H_X3_B18:G03
REP.B020_HA1E_24H_X2_B23:J16
REP.B015_HA1E_24H_X2_B23:J18
REP.B020_HA1E_24H_X1_B23:A05
REP.A020_HA1E_24H_X3_B23:A05
REP.A013_HA1E_24H_X2_B24:J15
REP.B022_HA1E_24H_X1_B23:F12
REP.B023_HA1E_24H_X1_B23:A03
REP.A018_HA1E_24H_X3_B23:J15
DOSVAL003_HA1E_24H_X3_B19:J16
DOSVAL004_HA1E_24H_X1_B19:J17
LJP008_HA1E_24H_X1_B20:N20
PBIOA016_HA1E_24H_X3_B21:A03
PBIOA022_HA1E_24H_X2_B21:J17
PBIOA016_HA1E_24H_X1_B21:B04
PBIOA015_HA1E_24H_X1_B21:F11
REP.B004_HA1E_24H_X1_B22:J13
REP.B009_HA1E_24H_X2_B22:B03
REP.A004_HA1E_24H_X1_B22:F11
REP.A001_HA1E_24H_X3_B22:B06
REP.B003_HA1E_24H_X3_B22:A03
REP.B028_HA1E_24H_X2_B23:B06
REP.A025_HA1E_24H_X3_B23:B03
REP.B016_HA1E_24H_X2_B23:B06
REP.A022_HA1E_24H_X2.L2.A2_B23:J18
REP.A009_HA1E_24H_X3_B24:J13
CPC006_HA1E_24H_X2_B3_DUO52HI53LO:F05
CPC004_HA1E_24H_X2_B3_DUO52HI53LO:I15
CPC007_HA1E_24H_X1_B3_DUO52HI53LO:M01
HDAC002_HA1E_24H_X5_B7_DUO52HI53LO:G01
PCLB002_HA1E_24H_X3_B13:B05
DOSVAL003_HA1E_24H_X2_B19:F10
DOSVAL003_HA1E_24H_X2_B19:F08
DOSVAL005_HA1E_24H_X2_B19:N21
DOSVAL005_HA1E_24H_X2_B19:A04
REP.A004_HA1E_24H_X2_B22:B03
REP.A002_HA1E_24H_X1_B22:J15
REP.B001_HA1E_24H_X2_B22:B03
REP.A004_HA1E_24H_X3_B22:F08
DOSVAL003_HA1E_24H_X2_B19:J16
LJP007_HA1E_24H_X3_B20:A05
LJP007_HA1E_24H_X1_B20:N21
PBIOA021_HA1E_24H_X3_B21:B06
PBIOA016_HA1E_24H_X2_B21:F12
PBIOA017_HA1E_24H_X3_B21:N19
REP.B004_HA1E_24H_X2_B22:B06
REP.B003_HA1E_24H_X3_B22:F08
REP.B009_HA1E_24H_X2_B22:F07
REP.B022_HA1E_24H_X2_B23:F07
REP.B016_HA1E_24H_X2_B23:A03
REP.A017_HA1E_24H_X3_B23:A05
REP.A014_HA1E_24H_X2_B23:J18
REP.A014_HA1E_24H_X2_B23:J15
REP.B014_HA1E_24H_X1_B23:J15
REP.B014_HA1E_24H_X1_B23:J14
REP.A021_HA1E_24H_X3_B23:B03
REP.B027_HA1E_24H_X1_B23:A03
LJP006_HA1E_24H_X3_B19:N19
PBIOA015_HA1E_24H_X1_B21:F08
PBIOA022_HA1E_24H_X2_B21:F08
PBIOA016_HA1E_24H_X1_B21:J18
REP.A001_HA1E_24H_X3_B22:F09
REP.A026_HA1E_24H_X2_B25:A05
REP.A026_HA1E_24H_X2_B25:J14
REP.A023_HA1E_24H_X2_B23:J18
REP.A021_HA1E_24H_X1_B23:F10
REP.B015_HA1E_24H_X2_B23:A03
CRCGN004_HA1E_24H_X8_F1B7_DUO52HI53LO:F05
PCLB001_HA1E_24H_X2_B12:D18
PCLB001_HA1E_24H_X2_B12:D01
CPC007_HA1E_24H_X3_B3_DUO52HI53LO:N02
CPC003_HA1E_24H_X2_B3_DUO52HI53LO:I16
PCLB002_HA1E_24H_X3_B13:A06
DOSVAL001_HA1E_24H_X2_B18:J13
DOSVAL005_HA1E_24H_X1_B19:F11
PBIOA021_HA1E_24H_X1_B21:F10
REP.A007_HA1E_24H_X3_B22:A05
DOSVAL005_HA1E_24H_X2_B19:A06
PBIOA015_HA1E_24H_X3_B21:B03
PBIOA018_HA1E_24H_X2_B21:N23
REP.A002_HA1E_24H_X2_B22:J14
REP.A005_HA1E_24H_X3_B22:B05
LUNG001_NL20_24H_X3_B18:K02
REP.A018_HA1E_24H_X2_B23:B03
REP.B019_HA1E_24H_X2_B23:A06
REP.A009_HA1E_24H_X2_B24:J17
REP.A017_HA1E_24H_X3_B23:F08
REP.B019_HA1E_24H_X2_B23:J15
REP.B009_HA1E_24H_X1.A2_B23:J14
REP.B010_HA1E_24H_X1_B23:F12
REP.A010_HA1E_24H_X1_B24:A03
DOSVAL004_HA1E_24H_X2_B19:J17
LJP008_HA1E_24H_X3_B20:N20
PBIOA020_HA1E_24H_X1_B21:F07
REP.A012_HA1E_24H_X1_B22:F08
REP.B028_HA1E_24H_X1_B23:F10
REP.B028_HA1E_24H_X1_B23:J15
REP.A023_HA1E_24H_X3_B23:A04
REP.B016_HA1E_24H_X2_B23:J17
REP.A022_HA1E_24H_X1_B23:J18
REP.B023_HA1E_24H_X1_B23:F11
REP.A016_HA1E_24H_X2_B23:F11
REP.A014_HA1E_24H_X2_B23:F08
REP.B014_HA1E_24H_X2_B23:J15
MUC.CP008_HA1E_24H_X2_B34:B03
CRCGN004_HA1E_24H_X6_F1B7_DUO52HI53LO:N09
CPC004_HA1E_24H_X3_B3_DUO52HI53LO:A18
KTOX002_HPTEC_24H_X3_B18:J18
DOSVAL001_HA1E_24H_X2_B18:J18
PBIOA019_HA1E_24H_X2_B21:A03
PBIOA022_HA1E_24H_X2_B21:N21
PBIOA013_HA1E_24H_X1_B21:N21
REP.A003_HA1E_24H_X2_B22:B03
LJP005_HA1E_24H_X1_B19:A04
DOSVAL003_HA1E_24H_X2_B19:F11
LJP007_HA1E_24H_X1_B20:N20
REP.A001_HA1E_24H_X3_B22:J15
REP.B005_HA1E_24H_X1_B22:A03
REP.B006_HA1E_24H_X2_B22:J14
LUNG001_NL20_24H_X3_B18:G02
REP.A023_HA1E_24H_X1_B23:B06
REP.A022_HA1E_24H_X2.L2.A2_B23:J16
REP.A021_HA1E_24H_X3_B23:J17
REP.B010_HA1E_24H_X1_B23:F11
REP.B028_HA1E_24H_X2_B23:B04
REP.B024_HA1E_24H_X2_B23:F11
REP.A019_HA1E_24H_X2_B24:J17
REP.B021_HA1E_24H_X2_B23:B03
REP.B014_HA1E_24H_X2_B23:F11
REP.B010_HA1E_24H_X1_B23:J17
REP.A025_HA1E_24H_X3_B23:J15
PBIOA018_HA1E_24H_X2_B21:J16
PBIOA020_HA1E_24H_X2_B21:A04
REP.B005_HA1E_24H_X1_B22:B04
REP.A017_HA1E_24H_X2_B23:A06
REP.A024_HA1E_24H_X1_B23:A06
REP.B028_HA1E_24H_X1_B23:J17
DOSVAL002_HA1E_24H_X1_B19:J14
DOSVAL002_HA1E_24H_X1_B19:F11
PBIOA014_HA1E_24H_X2_B21:B06
PBIOA015_HA1E_24H_X3_B21:J16
KTOX002_HPTEC_24H_X2_B18:A07
LJP006_HA1E_24H_X1_B19:J16
PBIOA017_HA1E_24H_X2_B21:A04
REP.B002_HA1E_24H_X3_B22:A06
REP.B008_HA1E_24H_X1_B22:F08
REP.A003_HA1E_24H_X2_B22:B06
KTOX002_HPTEC_24H_X2_B18:I23
REP.A015_HA1E_24H_X3_B23:A03
REP.A022_HA1E_24H_X3_B23:J17
REP.B017_HA1E_24H_X1_B23:F08
REP.A023_HA1E_24H_X1_B23:B05
REP.A021_HA1E_24H_X1_B23:A05
REP.B026_HA1E_24H_X1_B23:B06
REP.A019_HA1E_24H_X3_B24:J14
REP.B016_HA1E_24H_X2_B23:A06
REP.B015_HA1E_24H_X1_B23:F11
LJP006_HA1E_24H_X1_B19:N20
DOSVAL003_HA1E_24H_X2_B19:J14
PBIOA019_HA1E_24H_X1_B20:A05
PBIOA013_HA1E_24H_X3_B21:J15
REP.A005_HA1E_24H_X3_B22:A04
REP.B008_HA1E_24H_X2_B22:B05
REP.A027_HA1E_24H_X2_B25:A03
REP.B025_HA1E_24H_X2_B25:B05
REP.B022_HA1E_24H_X2_B23:A04
REP.B016_HA1E_24H_X1_B23:J14
REP.A018_HA1E_24H_X3_B23:F10
REP.A023_HA1E_24H_X2_B23:J17
MUC.CP008_HA1E_24H_X1_B34:C21
MUC.CP008_HA1E_24H_X1_B34:G16
CPC006_HA1E_24H_X3_B3_DUO52HI53LO:M09
CPC007_HA1E_24H_X3_B3_DUO52HI53LO:M01
CPC007_HA1E_24H_X1_B3_DUO52HI53LO:H01
KTOX002_HPTEC_24H_X1_B18:A11
KTOX002_HPTEC_24H_X1_B18:J20
DOSVAL004_HA1E_24H_X3_B19:B04
DOSVAL005_HA1E_24H_X2_B19:J16
PBIOA016_HA1E_24H_X1_B21:J13
PBIOA016_HA1E_24H_X1_B21:J17
PBIOA019_HA1E_24H_X3_B21:B05
PBIOA021_HA1E_24H_X3_B21:F09
LUNG001_NL20_24H_X1_B18:D02
DOSVAL004_HA1E_24H_X1_B19:N22
PCL001_HA1E_24H_X3_B20:J16
PBIOA018_HA1E_24H_X2_B21:A06
REP.A007_HA1E_24H_X3_B22:A03
REP.A020_HA1E_24H_X3_B23:B04
REP.B011_HA1E_24H_X1_B23:F07
REP.B014_HA1E_24H_X1_B23:B06
REP.A016_HA1E_24H_X3_B23:A05
REP.A022_HA1E_24H_X1_B23:F08
REP.A014_HA1E_24H_X3_B23:A05
REP.A010_HA1E_24H_X2_B24:A06
REP.B013_HA1E_24H_X1_B24:F11
DOSVAL002_HA1E_24H_X2_B19:B05
REP.B001_HA1E_24H_X3_B22:F11
REP.B003_HA1E_24H_X1_B22:B06
REP.B001_HA1E_24H_X3_B22:B04
REP.A002_HA1E_24H_X2_B22:J16
REP.B024_HA1E_24H_X1_B23:J15
REP.A023_HA1E_24H_X2_B23:J15
REP.A019_HA1E_24H_X1_B23:F11
REP.A020_HA1E_24H_X2_B23:J13
MUC.CP008_HA1E_24H_X1_B34:A06
CRCGN004_HA1E_24H_X6_F1B7_DUO52HI53LO:M09
CPC005_HA1E_24H_X3_B3_DUO52HI53LO:F06
CPC006_HA1E_24H_X3_B3_DUO52HI53LO:N10
CPC001_HA1E_24H_X1_B3_DUO52HI53LO:A17
KTOX002_HPTEC_24H_X3_B18:B06
DOSVAL002_HA1E_24H_X2_B19:N20
REP.A004_HA1E_24H_X3_B22:J15
DOSVAL004_HA1E_24H_X2_B19:N21
PCL001_HA1E_24H_X2_B20:B06
PBIOA016_HA1E_24H_X1_B21:F08
PBIOA020_HA1E_24H_X1_B21:J14
REP.B001_HA1E_24H_X1_B22:J16
REP.B002_HA1E_24H_X1_B22:B04
REP.A012_HA1E_24H_X2_B22:J14
REP.B001_HA1E_24H_X1_B22:B03
PCLB002_HA1E_24H_X1_B13:A06
DOSVAL001_HA1E_24H_X1_B18:F07
REP.B021_HA1E_24H_X1_B23:A04
REP.A017_HA1E_24H_X2_B23:A03
PCL001_HA1E_24H_X3_B20:N21
LJP007_HA1E_24H_X3_B20:F07
PBIOA022_HA1E_24H_X1_B21:F07
REP.A002_HA1E_24H_X3_B22:A04
REP.A015_HA1E_24H_X2_B23:J13
REP.B009_HA1E_24H_X1.A2_B23:F12
REP.B026_HA1E_24H_X2_B23:J17
REP.A008_HA1E_24H_X3_B24:A03
MUC.CP008_HA1E_24H_X3_B34:G18
DOSVAL003_HA1E_24H_X1_B19:J15
LJP005_HA1E_24H_X2_B19:J13
DOSVAL005_HA1E_24H_X3_B19:F07
LJP008_HA1E_24H_X3_B20:P23
PBIOA016_HA1E_24H_X3_B21:F08
PBIOA017_HA1E_24H_X2_B21:N20
PBIOA018_HA1E_24H_X2_B21:B06
PBIOA019_HA1E_24H_X3_B21:A05
REP.B003_HA1E_24H_X1_B22:J15
REP.B002_HA1E_24H_X2_B22:J14
REP.A007_HA1E_24H_X3_B22:F11
LUNG001_NL20_24H_X3_B18:D02
DOSVAL002_HA1E_24H_X1_B19:A03
PBIOA019_HA1E_24H_X3_B21:N21
PBIOA014_HA1E_24H_X3_B21:F12
PBIOA022_HA1E_24H_X2_B21:J14
PBIOA022_HA1E_24H_X3_B21:A04
REP.A001_HA1E_24H_X2_B22:B04
REP.A007_HA1E_24H_X3_B22:J17
REP.B002_HA1E_24H_X3_B22:J17
REP.B009_HA1E_24H_X2_B22:A05
REP.A004_HA1E_24H_X1_B22:B04
LUNG001_NL20_24H_X1_B18:C02
REP.B011_HA1E_24H_X2_B23:J16
REP.B024_HA1E_24H_X2_B23:F09
REP.B018_HA1E_24H_X2_B23:F10
REP.B017_HA1E_24H_X2_B23:J18
REP.B028_HA1E_24H_X2_B23:J17
REP.A018_HA1E_24H_X2_B23:J18
REP.A023_HA1E_24H_X1_B23:F11
REP.B028_HA1E_24H_X1_B23:A05
REP.B011_HA1E_24H_X1_B23:A03
REP.B028_HA1E_24H_X1_B23:B03
REP.A019_HA1E_24H_X2_B24:J15
PCL001_HA1E_24H_X3_B20:N20
PCL001_HA1E_24H_X2_B20:F08
PBIOA022_HA1E_24H_X1_B21:J16
PBIOA015_HA1E_24H_X2_B21:A04
PBIOA020_HA1E_24H_X3_B21:A03
REP.A001_HA1E_24H_X3_B22:J16
REP.B001_HA1E_24H_X2_B22:A05
REP.B002_HA1E_24H_X2_B22:B04
REP.A001_HA1E_24H_X2_B22:F07
REP.B015_HA1E_24H_X1_B23:F10
REP.A021_HA1E_24H_X1_B23:B05
REP.B019_HA1E_24H_X2_B23:F12
CPC005_HA1E_24H_X3_B3_DUO52HI53LO:E06
CPC006_HA1E_24H_X3_B3_DUO52HI53LO:I15
CPC005_HA1E_24H_X2_B3_DUO52HI53LO:I16
CPC005_HA1E_24H_X1_B3_DUO52HI53LO:A17
CPC003_HA1E_24H_X3_B3_DUO52HI53LO:E06
HDAC002_HA1E_24H_X1_B7_DUO52HI53LO:P02
KTOX002_HPTEC_24H_X1_B18:J21
KTOX002_HPTEC_24H_X3_B18:A09
LUNG001_NL20_24H_X3_B18:K24
DOSVAL004_HA1E_24H_X1_B19:J13
LJP006_HA1E_24H_X3_B19:F07
LJP006_HA1E_24H_X3_B19:F09
PBIOA016_HA1E_24H_X2_B21:N24
REP.B002_HA1E_24H_X2_B22:J16
REP.A001_HA1E_24H_X1_B22:J15
DOSVAL003_HA1E_24H_X2_B19:B06
PBIOA022_HA1E_24H_X1_B21:J15
PBIOA022_HA1E_24H_X2_B21:A05
REP.B001_HA1E_24H_X1_B22:J17
REP.A012_HA1E_24H_X1_B22:B03
REP.B005_HA1E_24H_X2_B22:A03
REP.B001_HA1E_24H_X1_B22:F09
REP.B006_HA1E_24H_X1_B22:A03
REP.B002_HA1E_24H_X3_B22:J13
REP.B003_HA1E_24H_X2_B22:F09
REP.B014_HA1E_24H_X2_B23:B05
REP.B019_HA1E_24H_X2_B23:B05
REP.B023_HA1E_24H_X1_B23:J17
REP.A014_HA1E_24H_X2_B23:J14
REP.B014_HA1E_24H_X2_B23:F09
REP.A021_HA1E_24H_X2_B23:B05
REP.A023_HA1E_24H_X2_B23:B06
REP.B015_HA1E_24H_X2_B23:F10
REP.B011_HA1E_24H_X1_B23:A04
REP.B013_HA1E_24H_X2_B24:F12
PBIOA016_HA1E_24H_X3_B21:J16
PBIOA013_HA1E_24H_X3_B21:A05
PBIOA020_HA1E_24H_X1_B21:F12
PBIOA016_HA1E_24H_X2_B21:A06
REP.B004_HA1E_24H_X3_B22:J17
REP.B024_HA1E_24H_X1_B23:F10
REP.B010_HA1E_24H_X2_B23:B06
CPC007_HA1E_24H_X2_B3_DUO52HI53LO:F02
PCLB003_HA1E_24H_X3_B13:B06
PCLB003_HA1E_24H_X2_B13:B04
KTOX002_HPTEC_24H_X1_B18:J23
LJP006_HA1E_24H_X3_B19:N21
DOSVAL006_HA1E_24H_X3_B19:A05
DOSVAL005_HA1E_24H_X2_B19:F08
PBIOA013_HA1E_24H_X3_B21:F11
REP.B006_HA1E_24H_X2_B22:A03
DOSVAL001_HA1E_24H_X1_B18:F08
LUNG001_NL20_24H_X1_B18:G02
LJP006_HA1E_24H_X1_B19:F11
LJP007_HA1E_24H_X3_B20:F11
PBIOA020_HA1E_24H_X3_B21:B06
REP.B008_HA1E_24H_X2_B22:B03
REP.A025_HA1E_24H_X2_B23:A06
REP.B021_HA1E_24H_X1_B23:F10
REP.B021_HA1E_24H_X1_B23:F11
REP.B026_HA1E_24H_X2_B23:A03
REP.A024_HA1E_24H_X1_B23:J16
REP.B021_HA1E_24H_X1_B23:J17
REP.B026_HA1E_24H_X1_B23:F11
REP.B021_HA1E_24H_X2_B23:F11
DOSVAL003_HA1E_24H_X1_B19:N23
DOSVAL005_HA1E_24H_X3_B19:J15
LJP006_HA1E_24H_X2_B19:A05
PBIOA019_HA1E_24H_X1_B20:F08
PBIOA021_HA1E_24H_X2_B21:F12
REP.A005_HA1E_24H_X1_B22:A06
REP.B004_HA1E_24H_X1_B22:F09
REP.B001_HA1E_24H_X3_B22:B06
REP.B004_HA1E_24H_X3_B22:B04
REP.A021_HA1E_24H_X1_B23:B06
REP.A020_HA1E_24H_X2_B23:B05
REP.A028_HA1E_24H_X1_B25:A04
CRCGN004_HA1E_24H_X7_F1B7_DUO52HI53LO:B17
PCLB001_HA1E_24H_X2_B12:D09
CPC003_HA1E_24H_X2_B3_DUO52HI53LO:M09
CPC002_HA1E_24H_X1_B3_DUO52HI53LO:M10
CPC002_HA1E_24H_X1_B3_DUO52HI53LO:J16
HDAC002_HA1E_24H_X1_B7_DUO52HI53LO:L02
DOSVAL001_HA1E_24H_X1_B18:F12
LJP005_HA1E_24H_X1_B19:N23
DOSVAL006_HA1E_24H_X2_B19:J15
LJP006_HA1E_24H_X1_B19:A04
PCL001_HA1E_24H_X1_B20:J13
PBIOA013_HA1E_24H_X3_B21:N22
PBIOA014_HA1E_24H_X3_B21:N22
PBIOA015_HA1E_24H_X3_B21:J13
PBIOA015_HA1E_24H_X1_B21:A03
PBIOA022_HA1E_24H_X3_B21:F09
REP.A004_HA1E_24H_X1_B22:B06
REP.A004_HA1E_24H_X2_B22:J13
REP.B005_HA1E_24H_X2_B22:B05
REP.B002_HA1E_24H_X1_B22:A03
LUNG001_NL20_24H_X1_B18:E24
DOSVAL005_HA1E_24H_X2_B19:F09
LJP006_HA1E_24H_X3_B19:A06
DOSVAL002_HA1E_24H_X2_B19:F10
DOSVAL006_HA1E_24H_X2_B19:A04
DOSVAL002_HA1E_24H_X3_B19:N24
LJP009_HA1E_24H_X3_B20:F09
PBIOA019_HA1E_24H_X1_B20:F11
PCLB002_HA1E_24H_X1_B13:A05
PCLB003_HA1E_24H_X1_B13:A04
DOSVAL001_HA1E_24H_X2_B18:N21
REP.A025_HA1E_24H_X3_B23:J17
REP.B010_HA1E_24H_X2_B23:J17
REP.B011_HA1E_24H_X2_B23:J17
REP.A025_HA1E_24H_X1_B23:A05
REP.B019_HA1E_24H_X1_B23:A04
REP.B014_HA1E_24H_X1_B23:F11
REP.A016_HA1E_24H_X1_B23:J16
REP.B021_HA1E_24H_X2_B23:B06
REP.A023_HA1E_24H_X1_B23:A03
REP.B028_HA1E_24H_X1_B23:F07
REP.A022_HA1E_24H_X1_B23:A03
LJP006_HA1E_24H_X2_B19:F09
PBIOA015_HA1E_24H_X2_B21:N24
REP.B004_HA1E_24H_X1_B22:J17
REP.B001_HA1E_24H_X1_B22:J13
REP.A003_HA1E_24H_X1_B22:A05
REP.A007_HA1E_24H_X1_B22:F11
REP.B025_HA1E_24H_X2_B25:F09
REP.B023_HA1E_24H_X2_B23:F10
REP.A024_HA1E_24H_X3_B23:A04
REP.A015_HA1E_24H_X2_B23:A06
REP.B016_HA1E_24H_X1_B23:B06
REP.A025_HA1E_24H_X1_B23:J14
REP.A025_HA1E_24H_X3_B23:F12
REP.A011_HA1E_24H_X2_B24:A06
REP.A028_HA1E_24H_X3_B25:J18
CRCGN004_HA1E_24H_X8_F1B7_DUO52HI53LO:N22
CPC004_HA1E_24H_X3_B3_DUO52HI53LO:J16
CPC005_HA1E_24H_X2_B3_DUO52HI53LO:M10
DOSVAL003_HA1E_24H_X2_B19:N20
DOSVAL003_HA1E_24H_X2_B19:F12
PBIOA018_HA1E_24H_X2_B21:B03
PBIOA016_HA1E_24H_X1_B21:F10
REP.B008_HA1E_24H_X1_B22:A03
REP.A002_HA1E_24H_X2_B22:A04
REP.B005_HA1E_24H_X2_B22:J17
REP.A002_HA1E_24H_X3_B22:J16
DOSVAL004_HA1E_24H_X3_B19:J14
DOSVAL003_HA1E_24H_X1_B19:N21
PBIOA021_HA1E_24H_X1_B21:A06
REP.B003_HA1E_24H_X1_B22:A06
REP.A001_HA1E_24H_X3_B22:A05
REP.A005_HA1E_24H_X1_B22:F10
REP.A003_HA1E_24H_X2_B22:A03
REP.B020_HA1E_24H_X1_B23:F11
REP.B023_HA1E_24H_X2_B23:F12
REP.B014_HA1E_24H_X1_B23:F07
REP.A015_HA1E_24H_X1_B23:J17
REP.B010_HA1E_24H_X1_B23:A04
REP.A024_HA1E_24H_X1_B23:F08
REP.A017_HA1E_24H_X1_B23:F08
REP.B026_HA1E_24H_X2_B23:A06
REP.B019_HA1E_24H_X2_B23:B06
REP.B018_HA1E_24H_X1_B23:J18
DOSVAL003_HA1E_24H_X2_B19:J15
LJP005_HA1E_24H_X3_B19:N23
DOSVAL006_HA1E_24H_X2_B19:J18
LJP008_HA1E_24H_X3_B20:B05
PBIOA019_HA1E_24H_X3_B21:F10
PBIOA015_HA1E_24H_X3_B21:A06
REP.A003_HA1E_24H_X3_B22:J16
REP.B001_HA1E_24H_X1_B22:A05
REP.B005_HA1E_24H_X3_B22:J16
REP.A003_HA1E_24H_X3_B22:F10
REP.A028_HA1E_24H_X1_B25:B06
REP.B025_HA1E_24H_X2_B25:F12
REP.A025_HA1E_24H_X1_B23:J16
REP.A016_HA1E_24H_X3_B23:B06
REP.B021_HA1E_24H_X1_B23:B03
REP.B027_HA1E_24H_X2_B23:F07
REP.B021_HA1E_24H_X1_B23:B04
REP.B027_HA1E_24H_X1_B23:F07
REP.B022_HA1E_24H_X2_B23:F11
REP.B019_HA1E_24H_X1_B23:B04
CPC005_HA1E_24H_X3_B3_DUO52HI53LO:J15
CPC007_HA1E_24H_X3_B3_DUO52HI53LO:O02
DOSVAL001_HA1E_24H_X3_B18:C11
LUNG001_NL20_24H_X3_B18:J02
KTOX002_HPTEC_24H_X2_B18:A05
DOSVAL002_HA1E_24H_X1_B19:N24
DOSVAL004_HA1E_24H_X2_B19:B03
PBIOA021_HA1E_24H_X3_B21:B03
PBIOA021_HA1E_24H_X1_B21:J15
REP.A012_HA1E_24H_X2_B22:B06
REP.A007_HA1E_24H_X1_B22:J14
REP.A003_HA1E_24H_X2_B22:A04
REP.A002_HA1E_24H_X1_B22:A05
DOSVAL006_HA1E_24H_X2_B19:F08
PBIOA019_HA1E_24H_X1_B20:A06
PCL001_HA1E_24H_X2_B20:F11
LJP008_HA1E_24H_X1_B20:F08
PBIOA014_HA1E_24H_X3_B21:J15
REP.A002_HA1E_24H_X1_B22:F09
REP.A012_HA1E_24H_X2_B22:A03
KTOX002_HPTEC_24H_X3_B18:J19
REP.B019_HA1E_24H_X1_B23:J18
REP.A021_HA1E_24H_X3_B23:A05
REP.B022_HA1E_24H_X1_B23:F07
REP.B014_HA1E_24H_X2_B23:F12
REP.B018_HA1E_24H_X1_B23:J16
REP.B020_HA1E_24H_X1_B23:A03
PBIOA016_HA1E_24H_X3_B21:J15
PBIOA014_HA1E_24H_X3_B21:B04
PBIOA019_HA1E_24H_X2_B21:F12
REP.B006_HA1E_24H_X1_B22:B05
REP.B002_HA1E_24H_X1_B22:B03
REP.B004_HA1E_24H_X3_B22:J13
REP.A004_HA1E_24H_X3_B22:B05
REP.B009_HA1E_24H_X2_B22:A04
REP.A025_HA1E_24H_X3_B23:A05
REP.B026_HA1E_24H_X2_B23:A05
REP.B019_HA1E_24H_X1_B23:F09
REP.B015_HA1E_24H_X1_B23:F08
REP.B015_HA1E_24H_X1_B23:F12
REP.A022_HA1E_24H_X3_B23:A06
REP.A016_HA1E_24H_X3_B23:B05
REP.B023_HA1E_24H_X2_B23:J18
REP.A014_HA1E_24H_X1_B23:F12
REP.B007_HA1E_24H_X1_B24:F10
[truncated: 170,965 more rows]
