# Supplementary material for: REVIVE: a computational platform for systematically identifying rejuvenating chemical and genetic perturbations
Source: Aging (Albany NY). 2025 Nov 25;17(11):2844–58. doi: 10.18632/aging.206342 (PMC12705183; doi:10.18632/aging.206342)
Supplement: Supplementary Table 7 [file aging-17-11-206342-s008.xlsx]

## Sheet: RejuvenatingDrugs
Supplementary Table 7. Validation of the drug effect predicted by REVIVE with experimental evidence included in DrugAge.
	Lifespan increasing	Lifespan decreasing				Lifespan increasing (DrugAge)					Lifespan decreasing (DrugAge)
A-66				Decreasing	5	(2R)-1-(1-benzofuran-2-yl)-N-propylpentane-2-amine					16-alpha-hydroxyestradiol
A-769662				Increasing	41	(Iso)lappaol A					16(17)-epoxy-21-acetoxy-5-pregnenolone
ABT-737				Both	6	(R,R)-cis-Diethyl tetrahydro-2,8-chrysenediol					2-Oxothiazolidine-4-carboxylate
acarbose	x					(R)-2-hydroxyglutarate					2,4-pyridinedicarboxylic acid
acetaldehyde						(R/S)-1,3-butanediol					25-Azacoprostane
aclidinium						(S)-2-hydroxyglutarate					3230-2939
ACY-1215						1-methyl nicotinamide					4-dafachronic acid
aflatoxin-b1						1-methylxanthine					4-phenylbutyrate
AGK-2						1,2,3-Triazolyl ester of ketorolac					7-methyl-Dehydrosilybin
alclometasone						1,2,4-triazolo[1,5-a]pyridine					7,8-Dihydroxyflavone
alectinib						1,3-dimemethyl Xan					AA26-3
alfadolone-acetate						1,7-dimethylxanthine					AA26-8
aliskiren						10-hydroxy-2-decenoic Acid					AA26-9
alpha-estradiol	x	x				16-alpha-hydroxyestradiol					AA39-2
ALW-II-38-3						17‚Äêalpha‚Äêestradiol					AA39-3
ALW-II-49-7						18Œ±-Glycyrrhetinic acid					ABC32
aminogenistein	x					2-deoxy-D-glucose					ABC45
ampicillin	x					2-Ethyl-6-methylpyridin-3-ol hydrochloride					ABC84
amuvatinib						2-mercaptoethylamine hydrochloride					ABC90
anacardic-acid						2-Selenium-bridged-beta-cyclodextrin					ABC99
anandamide						2,3-dehydrosilybin					ABL127
anethole						2,3-Dehydrosilybin A					ABL303
antimycin-a		x				2,3-Dehydrosilybin B					Agmatine
ARG-CSC-91						2,3-Dihydroxybenzoic acid					Alln
ascorbic-acid	x	x				2,4-dinitrophenol					Alln II
AST-1306						2,5-Di-tert-butylhydroquinone					Aluminium chloride
AT-7867						2,5-Dimethyl-Celecoxib					Aluminium nitrate
austricine						3-Methoxycatechol II					Aluminum sulfate
AZ-20						3,3-diethyl-2-pyrrolidinone					Antimycin A
AZ-628						3,3'-thiodipropionic acid					Arecoline
azacitidine	x					3,4-dichloroisocoumarin					Argyreia boseana extract
azathioprine						3,4-dihydroxybenzaldehyde					Ascorbic acid
AZD-1480						3,5-dihydroxy-4'-acetoxy-trans-stilbene					Asparagine
AZD-4547						3,5-dihydroxy-4'-ethyl-trans-stilbene					Aspirin
AZD-7762						3,5-dihydroxy-4'-thiomethyl-trans-stilbene					Astemizole
AZD-9291						3:1 Mixture: salicyl-salicylic acid + aspirin					Benzalkonium chloride
BAS-00535043						4-dafachronic acid					Berberine
BAS-09104376						4-hydroxy-E-globularinin					Beta-carotene
BAY-61-3606						4-phenyl-3-furoxancarbonitrile					Beta-guanidinopropionic acid
BCL2-inhibitor						4,4‚Ä≤-dimethoxychalcone					Buthionine Sulfoximine
belinostat						4'-Demethylpipodophyllotoxin					Butylated hydroxyanisole
benzofuran	x					4‚Äêmethyl‚Äê2‚Äêoxovalerate					C75
benzthiazide						5-octanoyl salicylic acid					Cadmium chloride
benzylpenicillin						5‚Ä≤-Hydroxy-6, 7, 8, 3‚Ä≤, 4‚Ä≤-pentamethoxyflavone					Caffeine
bepridil						6-shogaol					Calcium dichloride
bexarotene						6526-0645					Canagliflozin
BGT-226						7-cyclopentyl-5-(4-phenoxy)phenyl-7H-pyrrolo[2,3-d]pyrimidin-4-ylamine					Cannabidiol
BI-2536						7-methylxanthine					Caprylate
bicalutamide						7,8-Dihydroxyflavone					Cardamonin
biotin						78c (CD38 inhibitor)					Cefazolin sodium
biperiden						ABC23					Ceoxide beads
bisoprolol						ABC26					Chlorhexidine
bisphenol-a						ABC28					Chloroquine
BIX-01294						ABC52					Chlorpromazine chloride
BIX-02189						ABC53					Cinoxacin
BMS-299897						ABC63					Clofilium Tosylate
BMS-509744						Acacetin 7-O-alpha-l-rhamnopyranosyl (1_2) beta-D-xylopyranoside					Creatine
BMS-777607						Acanthopanax sessiliflorus extract					Cryptotanshinone
BMY-14802						Acanthophora spicifera extract					Cupric chloride
bongkrek-acid						Acarbose					Cupric citrate
bortezomib						Acetaminophen					Cupric gluconate
bosutinib						Acetic Acid					Cupric glycinate
BRD-A02241946						AG-490					Cupric sulfate
BRD-A11009626						Agmatine					Curare
BRD-A11087911						Agrimonia procera extract					Curcumin
BRD-A19037878						Alanine					Cyclophosphamide
BRD-A19232309						Allantoin					D-Erythro-MAPP
BRD-A35825362						Alln					Darapladib
BRD-A41114263						Alpelisib					Deguelin
BRD-A43286952						Alpha-ketoglutarate					Demethylpipodophyllotoxin
BRD-A49906757						Alpha-lipoic acid					DH376
BRD-A72575012						Alpha-santalol					Diamide
BRD-A76641868						Alpha‚Äêketo‚Äêbeta‚Äêmethylvalerate					Diethyl Maleate
BRD-A92800748						Alpha‚Äêketoisovalerate					Diethylnitrosamine
BRD-A94451536						Alpha‚Äêlinolenic acid					Dimethyl sulfoxide
BRD-K00848147						Alsterpaullone					Diphyenyleneiodonium chloride
BRD-K01815685						Aluminium chloride					Disulfiram
BRD-K06188347						Amikacin hydrate					DL-isocitrate
BRD-K06800040						AMN082					Doxazosin mesylate
BRD-K07005393						Amoxapine					EGTA
BRD-K09784055						Amperozide hydrochloride					Eicosapentaenoic acid
BRD-K09991945						Ampicillin					Ellagic acid
BRD-K10436544						Anisomycin					Epicatechin
BRD-K12482929						APHS					Epigallocatechin-3-gallate
BRD-K15107389						Apple extract					Erythorbic acid
BRD-K18953385						Arbutin					Ethopropazine Hydrochloride
BRD-K19042873						Arctigenin					EUK-8
BRD-K19826688						Arctiin					Ferric ammonium citrate
BRD-K21037590						Arecoline					Ferrous chloride
BRD-K21672423						Arginine					Fish oil
BRD-K22081896						Argyreia boseana extract					Floxuridine
BRD-K25538169						Aronia extract					Fluoranthene
BRD-K25979535						Arsenite					Fluspirilene
BRD-K26510616						Ascorbic acid					Fluvoxamine
BRD-K26756156						Ascr#2					Fructose
BRD-K28112517						Ascr#3					Furosemide
BRD-K28761384						Asparagine					Galactose
BRD-K29107232						Aspirin					Genistein
BRD-K29983336						Astaxanthin					Glucose
BRD-K31168993						Astragaloside IV					Glutamate
BRD-K31553917						Astragalus extract					Glutamine
BRD-K31851742						AU701					Glutathione
BRD-K32927008						Auraptene					Glycerol
BRD-K33235400						Azacytidine					Gramicidin
BRD-K35030377						AZD2281					Hypotaurine
BRD-K40224283						Bacitracin					I-BET
BRD-K41931739						Baicalein					Imatinib mesylate
BRD-K42161310						Berberine					IMS2186
BRD-K43177857						Beta-alanine					Indomethacin
BRD-K43807558						Beta-aminopropionitrile fumarate					JJH221
BRD-K45330754						Beta-caryophyllene					JJH248
BRD-K45842176						Beta-estradiol					JS-K
BRD-K46170844						Beta-guanidinopropionic acid					Kanamycin A sulfate
BRD-K52678950						Beta-santalol					Kinetin
BRD-K53592093						Betaine					KLH46
BRD-K53987746						Betula utilis extract					KT109
BRD-K54018158						Bezafibrate					KT116
BRD-K54606188						BIA 10-2639					KT117
BRD-K55591206						Bis(1-hydroxy-2,2,6,6-tetramethyl-4-piperidinyl)-decandioate					KT138
BRD-K57926513						Black rice extract					KT186
BRD-K58479490						Black tea extract					KT195
BRD-K59470558						Blueberry extract					L-Gulonolactone
BRD-K60895275						BP-C3 (benzenepolycarboxylic acids mixture)					L-theanine
BRD-K61894884						Branched-chain amino acids					Licochalcone A
BRD-K62716919						BRL 15572					Lorglumide Sodium
BRD-K63388446						BRL 50481					Luteolin
BRD-K63399564						BTCP hydrochloride					Magnesium chloride
BRD-K63494246						Buckwheat trypsin inhibitor					Menadione
BRD-K63993117						Buformin					Mercuric chloride
BRD-K64024097						Bupivacaine Hydrochloride					Metformin
BRD-K67808578						Butein					Methionine
BRD-K68336408						Buthus martensii Karsch Polypeptide Toxin					Methylene blue
BRD-K69496360						Butylated hydroxyanisole					MG624
BRD-K69791739						Butylated hydroxytoluene					Mycophenolic acid
BRD-K71746288						C60 fullerene					N-acetyl-L-cysteine
BRD-K72166146						Cadmium chloride					Nebivolol
BRD-K73155123						Caffeic acid					Nicolsamide
BRD-K73261812						Caffeic acid phenethylester					Nicotine
BRD-K74623475						Caffeine					Nisoldipine
BRD-K76052538						Calcium pantothenate					Nitrophenyl piperazine containing compound 1
BRD-K83161876						Calycosin					Nitrosodimethylurea
BRD-K83354763						Canagliflozin					Nocodazole
BRD-K84421793						Cannabidiol					Nordihydroguaiaretic acid
BRD-K84798689						Capecitabine					NP1
BRD-K86110682						Caprylate					NSC 11926 (Aristolochic acid I)
BRD-K88965984						Capsaicin					NSC 45923 (8-Methyoxypsoralen)
BRD-K89190195						Captopril					NSC170984 (Pimozide)
BRD-K91701366						Carbonylcyanide-3-chlorophenylhydrazone					Obeticholic acid
BRD-K93623754						Carnosic acid					Ononetin
BRD-K96043519						Carnosine					Ornithine
BRD-K96834847						Carnosol					Oxcarbazepine
BRD-K99760897						Casein					p-fluorophenylalanine
BRD-M15189060						CASIN					Palmatine
BRL-15572						Catechin					Palmitic acid
bromocriptine						Celastrol					Paraquat
BS-181						Celecoxib					Perphenazine
buspirone						Cetylpyridinium chloride					Phenobarbital
busulfan						CGP37157					Phenol
BVD-523						Chicoric acid					Pinvarium Bromide
BX-795						Chloramphenicol					Plumbagin
C-646						Chlorogenic Acid					Podofilox
cabozantinib						Chlorophenyalanine					Propafenone hydrochloride
caffeic-acid	x					Chlorophyll					Propantheline Bromide
calcitriol						Chlorophytum borivilianum extract					Pterostilbene
calycanthine						Chloroquine					Putrescine
carbon-tetrachloride						Chlorprothixene hydrochloride					Pyruvate
CAY-10577						Chrysanthemum extract					Quercetin
CC-401						Chrysin					Resveratrol
CG-930						Ciclopirox olamine					Rhodiola rosea extract
CGK-733						Cinnamon extract					Riboflavin
CGP-55845						Cinnarizine					Ritodrine hydrochloride
CGS-12066B						Cis-(Z)-Flupenthixol dihydrochloride					Rizatriptan Benzoate
CH-223191						cis-vaccenic acid					Rotenone
chelerythrine						Clofibrate					Rotenone II
CHIR-99021						CMS121					Rutin
chloroform						Cocoa extract					Salicylic acid
chlorotrianisene						Coenzyme Q10					Salsalate
chlortalidone						Colanic acid					SC-560
choline-alfoscerate						Cordyceps sinensis oral liquid					Scutellarein
ciclacillin						Cortexolone maleate					Sodium azide
cimetidine						Cortisone					Sodium borate
cinanserin						Cranberry extract					Sodium butyrate
cisapride						Creatine					Sodium citrate
CL-218872						Crocus sativus extract					Sodium hypophosphite
clobetasol						Cryptotanshinone					Sodium Nitroprusside
clofarabine						CU701					Sodium salicylate
clofoctol						Cucurbitacin B					Sodium tungstate
CMAP-CRCGN-CB7950998						Cupric formate					SR27897
CMAP-CRCGN-CB7993113						Cupric lactate					Tannic acid
cobimetinib						Curare					Taurine
colforsin						Curcumin					Tetramethylpyrazine
coumaric-acid	x					Cyclosporin A					Thiostrepton
CTB						Cynomorium songaricum extract					Threonine
CVF-SUMO-14						Cyproterone acetate					Tiapride Hydrochloride
CX-5461						Cysteine					Triflupromazine hydrochloride
cyclopentene						Cytidine					Tryptophan
cyclophosphamide		x				D-alanine					Uric acid
cyclosporin-a	x					D-Allulose					Valine
D-4476						D-aspartate					Vincristine sulfate
D-64406						D-beta-hydroxybutyrate					Viramune
dabrafenib						D-glucosamine					Vitamin A palmitate
dacomitinib						D-glutamate					Vitamin E
daminozide						D609					Wortmannin
danazol	x					Dafachronic Acid					Zearalenone
dasatinib						Dafadine-A					Zinc acetate
decitabine						Damaurone D					Zinc Sulfate
deoxyrhapontin						Damnacanthus officinarum leaf extract					Ziprasidone HCl
dexamethasone	x					Damnacanthus officinarum root extract					Ziprasidone hydrochloride monohydrate
dibutyrylcyclic-gmp						Danazol
dichlorodiamine-platinum						DAPH
dieldrin						Dapsone
dilazep						Dehydroabietic acid
diltiazem						Demeclocycline hydrochloride
dioxane						DETA NONOate
dioxybenzone						Dexamethasone sodium phosphate
disopyramide						DhHP-6
DMBA						Diallyl trisulfide
DMeOB						Dibromoacetic acid
dolutegravir						Dichloroacetate
doramapimod						Diethyl Maleate
dorzolamide						Diethyldithiocarbamate
doxepin						Dihydroergocristine methanesulfonate
doxofylline						Dihydroergotamine methanesulfonate
droperidol						Dihydromyricetin
DU-728						Dihydrorotenon
EBPC						Diiodomethane
eicosatrienoic-acid						Dimethyl formamide
EMF-sumo1-1						Dimethyl Sulfide
emodin	x					Dimethyl sulfoxide
entinostat						Dimethylaminoethyl p-chlorophenoxyacetate
erismo-ester						Diosgenin
estropipate						DL-isocitrate
everolimus	x					DL-lactate
EX-527						DNIC-1a
EXO-1						Dofetilide
fdcyd						Doxazosin mesylate
febuxostat						Doxycycline
fenofibrate	x					Doxycycline hydrochloride
fenretinide						Echinacoside
FGIN-1-27						Edetate Calcium Disodium
fisetinidol						Electrolyzed reduced water
fluoxetine						Eleutherococcus senticosus extract
FR-122047						Eliprodil
FR-180204						Ellagic acid
FTI-276						Emblica officinalis extract
fulvestrant						Emodin
furan						Enalapril
ganciclovir						Enoxacin
GANT-61						Epicatechin
garcinol						Epigallocatechin-3-gallate
gavestinel						Epitalon
GDC-0068						Epithalamin
GDC-0879						Erbstatin analog
gefitinib						Erythorbic acid
geldanamycin	x					Erythromycin
gemfibrozil						Estradiol valerate
genistein	x					Ethidium bromide
givinostat						Ethosuximide
glimepiride						Ethoxyquin
glycerol	x	x				EUK-134
GNF-2						EUK-8
GR-159897						Everolimus
GSK-1059615						FCCP
GSK-1070916						Felbinac
GSK-2334470						Fenofibrate
GSK-429286A						Ferulic Acid
GSK-461364						Ferulsinaic acid
GSK-J1						Fisetin
GSK-J2						Fish oil
GSK-J4						Floxuridine
GW-3965						Flunarizine hydrochloride II
GW-5074						Fluprednisolone
HDAC1-selective	x					Fluspirilene
HDAC3-selective	x					Fluvastatin
HG-14-10-04						Fluvoxamine
HG-9-91-01						Folic acid
HMN-214						Formonoetin
hydrocortisone	x					Fructose
I-BET-151		x				Fucoxanthin
I-BET-762		x				Fumarate
ibrutinib						FW1251
icariin	x					FW1256
ICI-89406						G109
idelalisib						Galactose
iloprost						Gallic Acid
INCA-6						Gamma-tocopherol
indirubin	x					Ganoderma lucidum extract
iniparib						Garlic extract
IOX2						GDF11
ioxaglic-acid						Gedunin
ischemin						Geldanamycin
isoniazid						Genistein
isoxsuprine						Geri-BP002A
JNJ-10191584						Ginkgo biloba extract
JNJ-38877605						Ginseng extract
JNK-IN-5A						Glaucarubinone
JQ-1-R						Glucomannan Hydrolysate
JW-55						Gluconic acid
JWE-035						Glucose
JWH-015						Glutamate
kepone						Glutamine
KI-20227						Glyceollin I
KIN-001-220						Glycerol
KIN001-055						Glycine
KIN001-127						Glycyrrhizae radix extract
KIN001-242						Gr-4D
KIN001-244						Green tea extract
KIN001-260						Guanabenz acetate
KIN001-266						Guanfacine hydrochloride
KIN001-269						Guarana extract
KIN001-270						GYY4137
KU-55933						HA-1004
KU-60019						HA-1077
KW-2449						Haloperidol
L-368899						Hesperetin
lacosamide						Hesperidin
latanoprost						Hexahydro-sila-diphenidol
latrunculin-b						HF
lenalidomide						HF-HQ
levobunolol						Hispidol
levomepromazine						Histidine
levosimendan						Holothuria scabra extract
lidocaine						Homocysteine
linezolid						Hon Tsai Tai extract
lobenzarit						Huan Shao Dan
LY-2603618						HuminFeed
LY-278584						Huperzine A
mannitol						Hydralazine
manumycin-a						Hydrocortisone acetate
masitinib						Hydrogen Sulphide
MC1568						Hydroxylamine hydrochloride
MDL-72832						Hypotaurine
medrysone						Ibuprofen
meptazinol						Icariin
methapyrilene						Ikarugamycin
methyl-testosterone						Indirubin
methylstat						Indole
MG-132						Indolepropionamide
MGCD-265						Inositol
midostaurin						IP6
MK-0752						Isoleucine
MK-1775						Isoprenol
MLN-0128						Isorhamnetin
MLN-8054						Isosilybin A/B
mocetinostat						Ivabradine
monocrotaline						Ivermectin
motesanib						J147
n-nitrosodiethylamine	x					Jania acutilobum extract
nadolol						Juglone
naloxone						Jujube fruit extract
naltriben						Kaempferol
naringenin	x					Kanamycin A sulfate
NCS-382						Kenpaullone
nemonapride						Ketanserin tartrate
nerol						Kinetin
niclosamide						KN-93
nicotinamide	x					Korean mistletoe extract
nifurtimox						KT120
nilotinib						KT140
nitrendipine	x					KT167
noreleagnine						KT172
noretynodrel						KU0063794
norgestimate						Kynurenic acid
NPK76-II-72-1						L-Carnitine
NU-7026						L-deprenyl
NVP-BGJ398						L-histidine methyl ester
NVP-BHG712						L-theanine
NVP-TAE226						L-Valine
O-1918						L2-Cmu (IGF-1R antagonist)
okadaic-acid						Lamotrigine
olaparib	x					Lappaol C
orciprenaline						Lappaol F
orteronel						Leucine
OSI-930						Levodopa
oxiconazole						LFM-A13
oxidopamine						Lithium Chloride
oxymetazoline						Lithocholic acid
ozagrel						Liuwei Dihuang Wan
palonosetron						Lonicera japonica extract
palovarotene						Lonidamine
panobinostat						Loratadine
pazopanib						Lorglumide Sodium
PCI-34051						Losartan
PD-0325901						Lovastin
pentachlorophenol						Loxapine succinate
PF-04217903						Ludwigia octovalvis extract
PF-573228						Lutein
PFI-1						Luteolin
PHA-767491						LY-165,163
PHA-793887						LY-294002
phenylbutyrate	x					LY-367,265
phloretin						LY165_163
pifithrin-mu						Lysine
piketoprofen						M084
pindolol						magnesium L-thiazolidine-4-carboxylate
piroxicam						MAHMA-NONOate
PLX-4720						Malate
PNU-74654						Maltose
ponalrestat						Marine collagen peptides
ponatinib						Matairesinol
PP-2	x					Meclizine
practolol						Meclofenoxate
procaine	x					Melatonin
prostaglandin-a1						Mercuric chloride
PSB-36						Metamizole
pyrazolanthrone						Metergoline
QL-XI-92						Metformin
quiflapon						Methanol
quinapril						Methionine
quizartinib						Methyl 3,4-dihydroxybenzoate
radicicol						Methylene blue
RAF-265						Methylergonovine maleate
raloxifene						Metolazone
raltegravir						Metoprolol
rebastinib						Mianserin
regorafenib						Mifepristone
relcovaptan						Minocycline
reserpic-acid	x					Minocycline hydrochloride
resminostat						Monorden
resveratrol	x	x				Morphine
REV-5901						MPTP
RG-108						Mulberry extract
rigosertib						Mussel extract
Ro-10-5824						Mycophenolic acid
rolipram						Myricetin
rotenonic-acid	x					Myriocin
RS-504393						Myxothiazol
rucaparib						N-(2-[4-(4-chlorophenyl)piperazin-1-yl]ethyl)-3-methoxybenzamide
ruxolitinib						N-(3-(aminomethyl)benzyl)acetamidine
SA-425500						N-acetyl-L-cysteine
SA-84902						N-acetyl-l-histidine
salsolinol						N-acetylglucosamine
SAR-245409						N-nitrosodimethylamine
saracatinib						N-tert-butyl-alpha-phenylnitrone
SB-203580	x					Nafadotride
SB-216763						Naftopidil dihydrochloride
SB-225002						Naphthazarin
SB-239063						Naproxen
SB-525334						Naringin
scopolamine						Nebivolol
scoulerine						Nectarine extract
selegiline						Nicardipine hydrochloride
senicapoc						Nicotinamide
serdemetan						Nicotinamide riboside
SEW-00445						Nitrendipine
SGI-1776						Nitrophenyl piperazine containing compound 1
SGX-523						Nobiletin
SIB-1553A						Nocodazole
silibinin						Nolinospiroside F
sirolimus	x					Nordihydroguaiaretic acid
SMER-3						Nortriptyline hydrochloride
sofalcone						NP1
SR-12813						NS-398
staurosporine	x					NSC170984 (Pimozide)
streptozotocin						O13
SU-4312	x					Obeticholic acid
sunitinib						Octoclothepin maleate
suramin						Oleanolic acid
T-0156						Oleic Acid
TAK-715						Olive Oil
talampicillin						Omega-3 Monoacylglyceride Docosahexaenoic acid
tamoxifen						Omega-6
tangeritin						Ononetin
TBEP						Oregano extract
TCDD-dioxin						Ornithine
telmisartan						Orotate
temsirolimus	x					Otophylloside B
testosterone						Oxaloacetate
tetrachloroethylene						Oxatomide
tetracycline	x					Oxoline
tetramisole						Oxyresveratrol
TG-100115						p-coumaric acid
TGX-221						Palmitoleic acid
thalidomide						para-topolin
thapsigargin	x					Paraquat
thioridazine	x					Paxilline
timolol						PD-98059
tivantinib						PDMP
tivozanib						Pergolide methanesulfonate
TPCA-1						Peyssonnelia extract
tranilast						Phaseolus vulgaris extract
tranylcypromine						Phenformin
trehalose	x					Phenyl furoxancarbonitrile
tretinoin						phenylethanoid glycosides
triamcinolone						Phloridzin
trichloroethylene						Phosphatidylcholine
triciribine						Phosphatidylethanolamine
triphenyl-tin						Phosphatidylinositol ether lipid analogue 24
triprolidine						Phosphatidylinositol ether lipid analogue 6
tropisetron						Phosphatidylserine
tryptophan	x	x				Phosphoenolpyruvate
tubaic-acid						Piceatannol
tubastatin-a						Picolinic acid
tyramine						Pictilisib
UCL-2077						Piericidin A
UNC-0638						Pineal gland extract
UNC-1215						Pinitol
UNC-669						Pirenperone
urapidil						Platanus orientalis extract
urethane						Platinum nanoparticles
ursolic-acid	x					Platycladus orientalis extract
vandetanib						Plumbagin
VE-821						Polydatin
VE-822						Polygonum multiflorum extract
veliparib						Polyherbal phytomedicine
vinblastine						Pomegrenate juice
vinpocetine	x					Potassium Chloride
vorinostat						PP2 AG1879
VU-0403126						Pravastatin
VX-745						Pregnenolone
wortmannin	x	x				Prenol
WZ-4002						Proanthocycanidin
WZ-7043						Procaine
XMD-1499						Procyanidin C1
XMD-885						Procyanidins
XMD-892						Proline
Y-26763						Promethazine hydrochloride
Y-27152						Propionylpromazine hydrochloride
Y-27632						Propyl gallate
YM-298198						Protandim
yohimbine						Protocatechuic acid
zearalenone		x				Prunetin
ZM-306416						Psora-4
ZM-447439						Putrescine
						Pyridoxine
						Pyrrolidine dithiocarbamate
						Pyrroloquinoline quinone
						Pyruvate
						Q3'G
						Q3M
						Quercetin
						Quercetin dihydrate
						Quinic acid
						Quinidine sulfate
						Rapamycin
						Rasayana diet
						Raspberry extract
						Rebaudioside A
						Reishi extract
						Reserpine
						Resveratrol
						Rhodiola rosea extract
						Ribes fasciculatum extract
						Riboflavin
						Ribose
						Rifampicin
						Rifamycin SV
						Rosa damascena extract
						Rosmarinic acid
						Rotenone
						Royal Jelly
						Royalactin
						Rutin
						S-allylmercapto-N-acetylcysteine
						S,S-trolox-carnosine
						Salicylamide
						Salicylamine
						Salicylic acid
						Salsalate
						Sandalwood oil
						Sappanone A
						SB203580
						Secoisolariciresinol Diglucoside
						Selenocysteine
						Selenomethionine
						Serine
						Sesame extract
						Sesamin
						Sevelamer
						Shatavarin IV
						Shengmai Yin
						Shi Quan Da Bu Wan
						Silybin A/B
						Silychristin A/B
						Silydianin
						Silymarin
						Simvastatin
						SKF95282 dimaleate
						SkQ1
						Sodim cyclamate
						Sodium borate
						Sodium butyrate
						Sodium Chloride
						Sodium hypophosphite
						sodium L-thiazolidine-4-carboxylate
						Sodium pyruvate
						Sodium salicylate
						Sodium Yeast Nucleate
						Sorbitol
						Soybean trypsin inhibitor
						SP600125
						Specioside
						Spermidine
						Spermine
						SQDB
						SRT1720 (SIRT1 activator)
						Stachys lavandulifolia extract
						Staurosporine
						STX64
						SU 4312
						Succinate
						Sulfamerazine
						Sulfamethoxazole
						Sulforaphane
						Tamarixetin
						Tanespimycin
						Tannic acid
						Taurine
						Taxifolin
						Tectochrysin
						Terreic acid
						Tert-butyl hydroperoxide
						Tetracycline HCL
						Tetrahydrocurcumin
						Tetramethylpyrazine
						Thapsigargin
						Theophylline
						Thiazolidine carboxylic acid
						Thioflavin T
						Thioridazine hydrochloride
						Threonine
						Thymine
						Thymus extract
						Tiliroside
						Tinospora cordifolia extract
						Tocotrienol
						Tomatidine
						Torin 1
						TPEN
						Trametinib
						trans-2,40,5-trihydroxystilbene
						trans-3,5-dimethoxy-4-fluoro-4'-hydroxystilbene
						Trehalose
						Trequinsin hydrochloride
						Trichostatin A
						Triiodothyronine
						Trilobatin
						Trimethadione
						Triptolide
						Trolox
						Tryptophan
						Turmeric extract
						Tyrosine
						Tyrosine-Alanine Dipeptide
						Tyrosol
						Tyrphostin 1
						Tyrphostin 9
						Tyrphostin AG 1295
						Tyrphostin AG 1478
						Uric acid
						Urolithin A
						Urolithin B
						Urolithin C
						Urolithin D
						Ursolic acid
						Vaccinium angustifolium extract
						Valine
						Valproic acid
						Verapamil
						Verminoside
						Vigconic 28
						Vincristine sulfate
						Vinpocetine
						Vitamin A palmitate
						Vitamin D3
						Vitamin E
						Vitexin
						Withaferin A
						Withanolide A
						Wortmannin
						X203 (anti-IL-11)
						Xanthohumol
						Xylose

## Sheet: Pro-aging drugs
	Lifespan increasing	Lifespan decreasing				Lifespan increasing (DrugAge)					Lifespan decreasing (DrugAge)
17-AAG				Decreasing	6	(2R)-1-(1-benzofuran-2-yl)-N-propylpentane-2-amine					16-alpha-hydroxyestradiol
ABT-202				Increasing	22	(Iso)lappaol A					16(17)-epoxy-21-acetoxy-5-pregnenolone
ABT-751				Both	6	(R,R)-cis-Diethyl tetrahydro-2,8-chrysenediol					2-Oxothiazolidine-4-carboxylate
acebutolol						(R)-2-hydroxyglutarate					2,4-pyridinedicarboxylic acid
aclidinium						(R/S)-1,3-butanediol					25-Azacoprostane
adapalene						(S)-2-hydroxyglutarate					3230-2939
afatinib						1-methyl nicotinamide					4-dafachronic acid
AG-14361						1-methylxanthine					4-phenylbutyrate
agomelatine						1,2,3-Triazolyl ester of ketorolac					7-methyl-Dehydrosilybin
alectinib						1,2,4-triazolo[1,5-a]pyridine					7,8-Dihydroxyflavone
alpha-estradiol	x	x				1,3-dimemethyl Xan					AA26-3
alvocidib						1,7-dimethylxanthine					AA26-8
AM-580						10-hydroxy-2-decenoic Acid					AA26-9
amanitin						16-alpha-hydroxyestradiol					AA39-2
AMG-232						17‚Äêalpha‚Äêestradiol					AA39-3
amitriptyline						18Œ±-Glycyrrhetinic acid					ABC32
amlodipine						2-deoxy-D-glucose					ABC45
amonafide						2-Ethyl-6-methylpyridin-3-ol hydrochloride					ABC84
amphotericin						2-mercaptoethylamine hydrochloride					ABC90
anagrelide						2-Selenium-bridged-beta-cyclodextrin					ABC99
anisomycin	x					2,3-dehydrosilybin					ABL127
API-001						2,3-Dehydrosilybin A					ABL303
arbutin	x					2,3-Dehydrosilybin B					Agmatine
aripiprazole						2,3-Dihydroxybenzoic acid					Alln
AS-605240						2,4-dinitrophenol					Alln II
atorvastatin						2,5-Di-tert-butylhydroquinone					Aluminium chloride
axitinib						2,5-Dimethyl-Celecoxib					Aluminium nitrate
AZD-5363						3-Methoxycatechol II					Aluminum sulfate
AZD-8055						3,3-diethyl-2-pyrrolidinone					Antimycin A
barasertib-HQPA						3,3'-thiodipropionic acid					Arecoline
belinostat						3,4-dichloroisocoumarin					Argyreia boseana extract
benzonatate						3,4-dihydroxybenzaldehyde					Ascorbic acid
betazole						3,5-dihydroxy-4'-acetoxy-trans-stilbene					Asparagine
BG-1005						3,5-dihydroxy-4'-ethyl-trans-stilbene					Aspirin
BGT-226						3,5-dihydroxy-4'-thiomethyl-trans-stilbene					Astemizole
BI-2536						3:1 Mixture: salicyl-salicylic acid + aspirin					Benzalkonium chloride
birinapant						4-dafachronic acid					Berberine
BIX-01294						4-hydroxy-E-globularinin					Beta-carotene
bizine						4-phenyl-3-furoxancarbonitrile					Beta-guanidinopropionic acid
BMS-387032						4,4‚Ä≤-dimethoxychalcone					Buthionine Sulfoximine
bortezomib						4'-Demethylpipodophyllotoxin					Butylated hydroxyanisole
BRD-A08658758						4‚Äêmethyl‚Äê2‚Äêoxovalerate					C75
BRD-A13806944						5-octanoyl salicylic acid					Cadmium chloride
BRD-A19037878						5‚Ä≤-Hydroxy-6, 7, 8, 3‚Ä≤, 4‚Ä≤-pentamethoxyflavone					Caffeine
BRD-A26030894						6-shogaol					Calcium dichloride
BRD-A38479395						6526-0645					Canagliflozin
BRD-A44174994						7-cyclopentyl-5-(4-phenoxy)phenyl-7H-pyrrolo[2,3-d]pyrimidin-4-ylamine					Cannabidiol
BRD-A50590638						7-methylxanthine					Caprylate
BRD-A79545933						7,8-Dihydroxyflavone					Cardamonin
BRD-A90543464						78c (CD38 inhibitor)					Cefazolin sodium
BRD-A92800748						ABC23					Ceoxide beads
BRD-K01543453						ABC26					Chlorhexidine
BRD-K01621458						ABC28					Chloroquine
BRD-K02781692						ABC52					Chlorpromazine chloride
BRD-K09661167						ABC53					Cinoxacin
BRD-K10785504						ABC63					Clofilium Tosylate
BRD-K11533227						Acacetin 7-O-alpha-l-rhamnopyranosyl (1_2) beta-D-xylopyranoside					Creatine
BRD-K13959223						Acanthopanax sessiliflorus extract					Cryptotanshinone
BRD-K20721504						Acanthophora spicifera extract					Cupric chloride
BRD-K22587354						Acarbose					Cupric citrate
BRD-K24581449						Acetaminophen					Cupric gluconate
BRD-K34319349						Acetic Acid					Cupric glycinate
BRD-K34624563						AG-490					Cupric sulfate
BRD-K35832492						Agmatine					Curare
BRD-K35858371						Agrimonia procera extract					Curcumin
BRD-K35894044						Alanine					Cyclophosphamide
BRD-K40087974						Allantoin					D-Erythro-MAPP
BRD-K41888384						Alln					Darapladib
BRD-K41900823						Alpelisib					Deguelin
BRD-K42471691						Alpha-ketoglutarate					Demethylpipodophyllotoxin
BRD-K44252324						Alpha-lipoic acid					DH376
BRD-K45303727						Alpha-santalol					Diamide
BRD-K45330754						Alpha‚Äêketo‚Äêbeta‚Äêmethylvalerate					Diethyl Maleate
BRD-K49477330						Alpha‚Äêketoisovalerate					Diethylnitrosamine
BRD-K53500355						Alpha‚Äêlinolenic acid					Dimethyl sulfoxide
BRD-K54343811						Alsterpaullone					Diphyenyleneiodonium chloride
BRD-K54606188						Aluminium chloride					Disulfiram
BRD-K60085502						Amikacin hydrate					DL-isocitrate
BRD-K60870698						AMN082					Doxazosin mesylate
BRD-K61033289						Amoxapine					EGTA
BRD-K62242359						Amperozide hydrochloride					Eicosapentaenoic acid
BRD-K64024097						Ampicillin					Ellagic acid
BRD-K67626012						Anisomycin					Epicatechin
BRD-K68336408						APHS					Epigallocatechin-3-gallate
BRD-K71726959						Apple extract					Erythorbic acid
BRD-K74126469						Arbutin					Ethopropazine Hydrochloride
BRD-K75304533						Arctigenin					EUK-8
BRD-K76674262						Arctiin					Ferric ammonium citrate
BRD-K77239206						Arecoline					Ferrous chloride
BRD-K77983109						Arginine					Fish oil
BRD-K78133682						Argyreia boseana extract					Floxuridine
BRD-K79222491						Aronia extract					Fluoranthene
BRD-K83013900						Arsenite					Fluspirilene
BRD-K83694683						Ascorbic acid					Fluvoxamine
BRD-K84468307						Ascr#2					Fructose
BRD-K89997465						Ascr#3					Furosemide
BRD-K91834385						Asparagine					Galactose
BRD-K93830491						Aspirin					Genistein
BRD-K98596482						Astaxanthin					Glucose
BRD-K98645985						Astragaloside IV					Glutamate
BRD-K98948170						Astragalus extract					Glutamine
BRD-U12060954						AU701					Glutathione
BRD-U37528018						Auraptene					Glycerol
BVD-523						Azacytidine					Gramicidin
calcipotriol						AZD2281					Hypotaurine
camptothecin						Bacitracin					I-BET
carbidopa						Baicalein					Imatinib mesylate
CGK-733						Berberine					IMS2186
CGP-60474						Beta-alanine					Indomethacin
CGS-15943						Beta-aminopropionitrile fumarate					JJH221
CGS-21680						Beta-caryophyllene					JJH248
chelidonine						Beta-estradiol					JS-K
CHIR-99021						Beta-guanidinopropionic acid					Kanamycin A sulfate
chlorambucil						Beta-santalol					Kinetin
chromomycin-a3						Betaine					KLH46
ciclopirox	x					Betula utilis extract					KT109
citalopram						Bezafibrate					KT116
clioquinol						BIA 10-2639					KT117
clonazepam						Bis(1-hydroxy-2,2,6,6-tetramethyl-4-piperidinyl)-decandioate					KT138
clozapine						Black rice extract					KT186
colchicine						Black tea extract					KT195
crizotinib						Blueberry extract					L-Gulonolactone
CV-1808						BP-C3 (benzenepolycarboxylic acids mixture)					L-theanine
dacinostat						Branched-chain amino acids					Licochalcone A
dacomitinib						BRL 15572					Lorglumide Sodium
dasatinib						BRL 50481					Luteolin
daunorubicin						BTCP hydrochloride					Magnesium chloride
dcv-gsh						Buckwheat trypsin inhibitor					Menadione
dfcl-cys						Buformin					Mercuric chloride
dienestrol						Bupivacaine Hydrochloride					Metformin
DL-PDMP	x					Butein					Methionine
doconexent						Buthus martensii Karsch Polypeptide Toxin					Methylene blue
dovitinib						Butylated hydroxyanisole					MG624
doxorubicin						Butylated hydroxytoluene					Mycophenolic acid
duloxetine						C60 fullerene					N-acetyl-L-cysteine
dyphylline						Cadmium chloride					Nebivolol
ellipticine						Caffeic acid					Nicolsamide
emetine						Caffeic acid phenethylester					Nicotine
ENMD-2076						Caffeine					Nisoldipine
entinostat						Calcium pantothenate					Nitrophenyl piperazine containing compound 1
epirizole						Calycosin					Nitrosodimethylurea
epirubicin						Canagliflozin					Nocodazole
equilin						Cannabidiol					Nordihydroguaiaretic acid
equol						Capecitabine					NP1
erlotinib						Caprylate					NSC 11926 (Aristolochic acid I)
estradiol	?					Capsaicin					NSC 45923 (8-Methyoxypsoralen)
estradiol-cypionate	?					Captopril					NSC170984 (Pimozide)
estrone						Carbonylcyanide-3-chlorophenylhydrazone					Obeticholic acid
etoposide						Carnosic acid					Ononetin
etoricoxib						Carnosine					Ornithine
eugenol						Carnosol					Oxcarbazepine
EX-527						Casein					p-fluorophenylalanine
floxuridine	x	x				CASIN					Palmatine
fludarabine						Catechin					Palmitic acid
flunarizine	x					Celastrol					Paraquat
fluoxetine						Celecoxib					Perphenazine
fluvastatin	x					Cetylpyridinium chloride					Phenobarbital
fostamatinib						CGP37157					Phenol
fulvestrant						Chicoric acid					Pinvarium Bromide
furosemide		x				Chloramphenicol					Plumbagin
garcinol						Chlorogenic Acid					Podofilox
gatifloxacin						Chlorophenyalanine					Propafenone hydrochloride
GDC-0068						Chlorophyll					Propantheline Bromide
GDC-0199						Chlorophytum borivilianum extract					Pterostilbene
geldanamycin	x					Chloroquine					Putrescine
genistein	x	x				Chlorprothixene hydrochloride					Pyruvate
GSK-1059615						Chrysanthemum extract					Quercetin
GSK-2110183						Chrysin					Resveratrol
GSK-2334470						Ciclopirox olamine					Rhodiola rosea extract
GSK-J2						Cinnamon extract					Riboflavin
GW-501516						Cinnarizine					Ritodrine hydrochloride
haloperidol	x					Cis-(Z)-Flupenthixol dihydrochloride					Rizatriptan Benzoate
hydroflumethiazide						cis-vaccenic acid					Rotenone
hydroxyurea						Clofibrate					Rotenone II
I-BET-151		x				CMS121					Rutin
idarubicin						Cocoa extract					Salicylic acid
imatinib		x				Coenzyme Q10					Salsalate
indinavir						Colanic acid					SC-560
indometacin		x				Cordyceps sinensis oral liquid					Scutellarein
ingenol						Cortexolone maleate					Sodium azide
irinotecan						Cortisone					Sodium borate
isonicotinohydroxamic-acid						Cranberry extract					Sodium butyrate
isradipine						Creatine					Sodium citrate
ixazomib						Crocus sativus extract					Sodium hypophosphite
JNJ-7706621						Cryptotanshinone					Sodium Nitroprusside
JWE-035						CU701					Sodium salicylate
kcl						Cucurbitacin B					Sodium tungstate
ketamine						Cupric formate					SR27897
KIN001-270						Cupric lactate					Tannic acid
KU-0063794	x					Curare					Taurine
KW-2478						Curcumin					Tetramethylpyrazine
lamotrigine	x					Cyclosporin A					Thiostrepton
lapatinib						Cynomorium songaricum extract					Threonine
lead-acetate						Cyproterone acetate					Tiapride Hydrochloride
lestaurtinib						Cysteine					Triflupromazine hydrochloride
levosulpiride						Cytidine					Tryptophan
lidocaine						D-alanine					Uric acid
lithium-chloride	x					D-Allulose					Valine
lomerizine						D-aspartate					Vincristine sulfate
lopinavir						D-beta-hydroxybutyrate					Viramune
lorazepam						D-glucosamine					Vitamin A palmitate
lorcaserin						D-glutamate					Vitamin E
lurasidone						D609					Wortmannin
LY-215490						Dafachronic Acid					Zearalenone
LY-2365109						Dafadine-A					Zinc acetate
LY-2603618						Damaurone D					Zinc Sulfate
LY-294002						Damnacanthus officinarum leaf extract					Ziprasidone HCl
mannitol						Damnacanthus officinarum root extract					Ziprasidone hydrochloride monohydrate
manumycin-a						Danazol
marbofloxacin						DAPH
masitinib						Dapsone
MC1568						Dehydroabietic acid
metenkephalin						Demeclocycline hydrochloride
methiopril						DETA NONOate
methotrexate						Dexamethasone sodium phosphate
methylphenidate						DhHP-6
MG-132						Diallyl trisulfide
midodrine						Dibromoacetic acid
mitomycin						Dichloroacetate
mitomycin-c						Diethyl Maleate
mitoxantrone						Diethyldithiocarbamate
MLN-0128						Dihydroergocristine methanesulfonate
modafinil						Dihydroergotamine methanesulfonate
moxifloxacin						Dihydromyricetin
nacl						Dihydrorotenon
NF-449						Diiodomethane
nocodazole	x	x				Dimethyl formamide
noretynodrel						Dimethyl Sulfide
NPC26						Dimethyl sulfoxide
nutlin-3						Dimethylaminoethyl p-chlorophenoxyacetate
NVP-AUY922						Diosgenin
NVP-TAE226						DL-isocitrate
NVP-TAE684						DL-lactate
olanzapine						DNIC-1a
olaparib						Dofetilide
omeprazole						Doxazosin mesylate
OSI-027						Doxycycline
oxiracetam						Doxycycline hydrochloride
paclitaxel						Echinacoside
palbociclib						Edetate Calcium Disodium
panobinostat						Electrolyzed reduced water
paraquat	x	x				Eleutherococcus senticosus extract
parbendazole						Eliprodil
PCI-34051						Ellagic acid
PD-0325901						Emblica officinalis extract
PD-153035						Emodin
pentamidine						Enalapril
PF-02545920						Enoxacin
PF-03758309						Epicatechin
PF-06260933						Epigallocatechin-3-gallate
PHA-767491						Epitalon
PHA-793887						Epithalamin
PI-103						Erbstatin analog
pifithrin-mu						Erythorbic acid
piketoprofen						Erythromycin
pioglitazone						Estradiol valerate
pirarubicin						Ethidium bromide
PJ-34						Ethosuximide
potassium-canrenoate						Ethoxyquin
potassium-dichromate						EUK-134
PP-1						EUK-8
pramipexole						Everolimus
procaine	x					FCCP
procaterol						Felbinac
QL-XI-92						Fenofibrate
quetiapine						Ferulic Acid
R-547						Ferulsinaic acid
radicicol						Fisetin
raloxifene						Fish oil
raltegravir						Floxuridine
ramatroban						Flunarizine hydrochloride II
rilmenidine						Fluprednisolone
riluzole						Fluspirilene
ripasudil						Fluvastatin
risperidone						Fluvoxamine
RITA						Folic acid
roflumilast						Formonoetin
rolipram						Fructose
roscovitine						Fucoxanthin
ruboxistaurin						Fumarate
rucaparib						FW1251
saha						FW1256
SB-939						G109
selegiline						Galactose
selumetinib						Gallic Acid
sertraline						Gamma-tocopherol
SGI-1776						Ganoderma lucidum extract
simvastatin	x					Garlic extract
sirolimus	x					GDF11
sorafenib						Gedunin
SU-11274						Geldanamycin
sulfafurazole						Genistein
sulfamethoxazole	x					Geri-BP002A
sulfaphenazole						Ginkgo biloba extract
tacedinaline						Ginseng extract
TAK-733						Glaucarubinone
tamibarotene						Glucomannan Hydrolysate
tamoxifen						Gluconic acid
tandutinib						Glucose
tanespimycin	x					Glutamate
taselisib						Glutamine
tegobuvir						Glyceollin I
teroxirone						Glycerol
tetracycline	x					Glycine
thioridazine	x					Glycyrrhizae radix extract
thiostrepton		x				Gr-4D
tianeptine						Green tea extract
tipranavir						Guanabenz acetate
tirasemtiv						Guanfacine hydrochloride
topiramate						Guarana extract
topotecan						GYY4137
toremifene						HA-1004
tozasertib						HA-1077
trametinib	x					Haloperidol
trequinsin	x					Hesperetin
tretinoin						Hesperidin
trifluoperazine						Hexahydro-sila-diphenidol
trimipramine						HF
troglitazone						HF-HQ
valproic-acid	x					Hispidol
vandetanib						Histidine
varenicline						Holothuria scabra extract
vemurafenib						Homocysteine
verapamil	x					Hon Tsai Tai extract
vorinostat						Huan Shao Dan
voxtalisib						HuminFeed
wortmannin	x	x				Huperzine A
WYE-125132						Hydralazine
WZ-3146						Hydrocortisone acetate
XL-888						Hydrogen Sulphide
XMD-885						Hydroxylamine hydrochloride
YM-155						Hypotaurine
zidovudine						Ibuprofen
ziprasidone		x				Icariin
zolpidem						Ikarugamycin
zopiclone						Indirubin
						Indole
						Indolepropionamide
						Inositol
						IP6
						Isoleucine
						Isoprenol
						Isorhamnetin
						Isosilybin A/B
						Ivabradine
						Ivermectin
						J147
						Jania acutilobum extract
						Juglone
						Jujube fruit extract
						Kaempferol
						Kanamycin A sulfate
						Kenpaullone
						Ketanserin tartrate
						Kinetin
						KN-93
						Korean mistletoe extract
						KT120
						KT140
						KT167
						KT172
						KU0063794
						Kynurenic acid
						L-Carnitine
						L-deprenyl
						L-histidine methyl ester
						L-theanine
						L-Valine
						L2-Cmu (IGF-1R antagonist)
						Lamotrigine
						Lappaol C
						Lappaol F
						Leucine
						Levodopa
						LFM-A13
						Lithium Chloride
						Lithocholic acid
						Liuwei Dihuang Wan
						Lonicera japonica extract
						Lonidamine
						Loratadine
						Lorglumide Sodium
						Losartan
						Lovastin
						Loxapine succinate
						Ludwigia octovalvis extract
						Lutein
						Luteolin
						LY-165,163
						LY-294002
						LY-367,265
						LY165_163
						Lysine
						M084
						magnesium L-thiazolidine-4-carboxylate
						MAHMA-NONOate
						Malate
						Maltose
						Marine collagen peptides
						Matairesinol
						Meclizine
						Meclofenoxate
						Melatonin
						Mercuric chloride
						Metamizole
						Metergoline
						Metformin
						Methanol
						Methionine
						Methyl 3,4-dihydroxybenzoate
						Methylene blue
						Methylergonovine maleate
						Metolazone
						Metoprolol
						Mianserin
						Mifepristone
						Minocycline
						Minocycline hydrochloride
						Monorden
						Morphine
						MPTP
						Mulberry extract
						Mussel extract
						Mycophenolic acid
						Myricetin
						Myriocin
						Myxothiazol
						N-(2-[4-(4-chlorophenyl)piperazin-1-yl]ethyl)-3-methoxybenzamide
						N-(3-(aminomethyl)benzyl)acetamidine
						N-acetyl-L-cysteine
						N-acetyl-l-histidine
						N-acetylglucosamine
						N-nitrosodimethylamine
						N-tert-butyl-alpha-phenylnitrone
						Nafadotride
						Naftopidil dihydrochloride
						Naphthazarin
						Naproxen
						Naringin
						Nebivolol
						Nectarine extract
						Nicardipine hydrochloride
						Nicotinamide
						Nicotinamide riboside
						Nitrendipine
						Nitrophenyl piperazine containing compound 1
						Nobiletin
						Nocodazole
						Nolinospiroside F
						Nordihydroguaiaretic acid
						Nortriptyline hydrochloride
						NP1
						NS-398
						NSC170984 (Pimozide)
						O13
						Obeticholic acid
						Octoclothepin maleate
						Oleanolic acid
						Oleic Acid
						Olive Oil
						Omega-3 Monoacylglyceride Docosahexaenoic acid
						Omega-6
						Ononetin
						Oregano extract
						Ornithine
						Orotate
						Otophylloside B
						Oxaloacetate
						Oxatomide
						Oxoline
						Oxyresveratrol
						p-coumaric acid
						Palmitoleic acid
						para-topolin
						Paraquat
						Paxilline
						PD-98059
						PDMP
						Pergolide methanesulfonate
						Peyssonnelia extract
						Phaseolus vulgaris extract
						Phenformin
						Phenyl furoxancarbonitrile
						phenylethanoid glycosides
						Phloridzin
						Phosphatidylcholine
						Phosphatidylethanolamine
						Phosphatidylinositol ether lipid analogue 24
						Phosphatidylinositol ether lipid analogue 6
						Phosphatidylserine
						Phosphoenolpyruvate
						Piceatannol
						Picolinic acid
						Pictilisib
						Piericidin A
						Pineal gland extract
						Pinitol
						Pirenperone
						Platanus orientalis extract
						Platinum nanoparticles
						Platycladus orientalis extract
						Plumbagin
						Polydatin
						Polygonum multiflorum extract
						Polyherbal phytomedicine
						Pomegrenate juice
						Potassium Chloride
						PP2 AG1879
						Pravastatin
						Pregnenolone
						Prenol
						Proanthocycanidin
						Procaine
						Procyanidin C1
						Procyanidins
						Proline
						Promethazine hydrochloride
						Propionylpromazine hydrochloride
						Propyl gallate
						Protandim
						Protocatechuic acid
						Prunetin
						Psora-4
						Putrescine
						Pyridoxine
						Pyrrolidine dithiocarbamate
						Pyrroloquinoline quinone
						Pyruvate
						Q3'G
						Q3M
						Quercetin
						Quercetin dihydrate
						Quinic acid
						Quinidine sulfate
						Rapamycin
						Rasayana diet
						Raspberry extract
						Rebaudioside A
						Reishi extract
						Reserpine
						Resveratrol
						Rhodiola rosea extract
						Ribes fasciculatum extract
						Riboflavin
						Ribose
						Rifampicin
						Rifamycin SV
						Rosa damascena extract
						Rosmarinic acid
						Rotenone
						Royal Jelly
						Royalactin
						Rutin
						S-allylmercapto-N-acetylcysteine
						S,S-trolox-carnosine
						Salicylamide
						Salicylamine
						Salicylic acid
						Salsalate
						Sandalwood oil
						Sappanone A
						SB203580
						Secoisolariciresinol Diglucoside
						Selenocysteine
						Selenomethionine
						Serine
						Sesame extract
						Sesamin
						Sevelamer
						Shatavarin IV
						Shengmai Yin
						Shi Quan Da Bu Wan
						Silybin A/B
						Silychristin A/B
						Silydianin
						Silymarin
						Simvastatin
						SKF95282 dimaleate
						SkQ1
						Sodim cyclamate
						Sodium borate
						Sodium butyrate
						Sodium Chloride
						Sodium hypophosphite
						sodium L-thiazolidine-4-carboxylate
						Sodium pyruvate
						Sodium salicylate
						Sodium Yeast Nucleate
						Sorbitol
						Soybean trypsin inhibitor
						SP600125
						Specioside
						Spermidine
						Spermine
						SQDB
						SRT1720 (SIRT1 activator)
						Stachys lavandulifolia extract
						Staurosporine
						STX64
						SU 4312
						Succinate
						Sulfamerazine
						Sulfamethoxazole
						Sulforaphane
						Tamarixetin
						Tanespimycin
						Tannic acid
						Taurine
						Taxifolin
						Tectochrysin
						Terreic acid
						Tert-butyl hydroperoxide
						Tetracycline HCL
						Tetrahydrocurcumin
						Tetramethylpyrazine
						Thapsigargin
						Theophylline
						Thiazolidine carboxylic acid
						Thioflavin T
						Thioridazine hydrochloride
						Threonine
						Thymine
						Thymus extract
						Tiliroside
						Tinospora cordifolia extract
						Tocotrienol
						Tomatidine
						Torin 1
						TPEN
						Trametinib
						trans-2,40,5-trihydroxystilbene
						trans-3,5-dimethoxy-4-fluoro-4'-hydroxystilbene
						Trehalose
						Trequinsin hydrochloride
						Trichostatin A
						Triiodothyronine
						Trilobatin
						Trimethadione
						Triptolide
						Trolox
						Tryptophan
						Turmeric extract
						Tyrosine
						Tyrosine-Alanine Dipeptide
						Tyrosol
						Tyrphostin 1
						Tyrphostin 9
						Tyrphostin AG 1295
						Tyrphostin AG 1478
						Uric acid
						Urolithin A
						Urolithin B
						Urolithin C
						Urolithin D
						Ursolic acid
						Vaccinium angustifolium extract
						Valine
						Valproic acid
						Verapamil
						Verminoside
						Vigconic 28
						Vincristine sulfate
						Vinpocetine
						Vitamin A palmitate
						Vitamin D3
						Vitamin E
						Vitexin
						Withaferin A
						Withanolide A
						Wortmannin
						X203 (anti-IL-11)
						Xanthohumol
						Xylose
