# Supplementary material for: REVIVE: a computational platform for systematically identifying rejuvenating chemical and genetic perturbations
Source: Aging (Albany NY). 2025 Nov 25;17(11):2844–58. doi: 10.18632/aging.206342 (PMC12705183; doi:10.18632/aging.206342)
Supplement: Supplementary Table 8 [file aging-17-11-206342-s009.xlsx]

## Sheet: Sheet1
Supplementary Table 8. Statistics of the predicted age differences and corresponding t-statistics for each perturbation included in the screen.
	NumConSamps	NumExpSamps	AgeDiff	t.statistic	t.pval	t.qval	Perturbagen	PertType	Dosage	TreatmentDuration	CellType
Epithelial Cell;Gly-Gly-PALO;trt_cp;80 uM;6 h	585	5	-7.0696	-1.71898	0.15916	0.348979	Gly-Gly-PALO	trt_cp	80 uM	6 h	Epithelial Cell
Epithelial Cell;sparfosic-acid;trt_cp;80 uM;6 h	585	5	-1.13898	-0.692008	0.522171	0.689443	sparfosic-acid	trt_cp	80 uM	6 h	Epithelial Cell
Epithelial Cell;Ro-28-1675;trt_cp;150 uM;6 h	585	5	-3.98447	-2.30436	0.0745304	0.227083	Ro-28-1675	trt_cp	150 uM	6 h	Epithelial Cell
Epithelial Cell;BRD-K84924563;trt_cp;40 uM;24 h	4104	3	-7.26089	-5.54588	0.0299671	0.133726	BRD-K84924563	trt_cp	40 uM	24 h	Epithelial Cell
Epithelial Cell;XAV-939;trt_cp;12 uM;6 h	585	5	-1.40462	-0.785308	0.471454	0.649414	XAV-939	trt_cp	12 uM	6 h	Epithelial Cell
Epithelial Cell;amphotericin;trt_cp;1000 uM;6 h	585	3	22.5417	3.22473	0.0833502	0.241865	amphotericin	trt_cp	1000 uM	6 h	Epithelial Cell
Epithelial Cell;dexamethasone;trt_cp;100 uM;6 h	585	3	21.6257	4.8285	0.0388411	0.155985	dexamethasone	trt_cp	100 uM	6 h	Epithelial Cell
Epithelial Cell;allopurinol;trt_cp;100 uM;24 h	4104	3	31.3268	5.90253	0.0274636	0.126599	allopurinol	trt_cp	100 uM	24 h	Epithelial Cell
Epithelial Cell;BRD-U37528018;trt_cp;30 uM;24 h	4104	3	29.0981	13.3688	0.00543009	0.0439784	BRD-U37528018	trt_cp	30 uM	24 h	Epithelial Cell
Epithelial Cell;methotrexate;trt_cp;100 uM;6 h	585	3	19.6459	4.51793	0.043993	0.167653	methotrexate	trt_cp	100 uM	6 h	Epithelial Cell
Epithelial Cell;mitomycin;trt_cp;100 uM;24 h	4104	3	28.7793	16.9098	0.00334379	0.0308195	mitomycin	trt_cp	100 uM	24 h	Epithelial Cell
Epithelial Cell;BRD-A38479395;trt_cp;30 uM;24 h	4104	3	19.4891	19.4794	0.00232042	0.0235912	BRD-A38479395	trt_cp	30 uM	24 h	Epithelial Cell
Epithelial Cell;kenpaullone;trt_cp;15 uM;24 h	4104	3	7.03031	0.960633	0.43806	0.622738	kenpaullone	trt_cp	15 uM	24 h	Epithelial Cell
Neural Progenitor Cell;IPI-145;trt_cp;0.5 uM;6 h	73	3	-11.7693	-1.83673	0.193666	0.3885	IPI-145	trt_cp	0.5 uM	6 h	Neural Progenitor Cell
Neural Progenitor Cell;duloxetine;trt_cp;12.5 uM;24 h	1286	12	11.642	3.8754	0.00247575	0.0247526	duloxetine	trt_cp	12.5 uM	24 h	Neural Progenitor Cell
Neural Progenitor Cell;isradipine;trt_cp;6.66 uM;24 h	1286	15	11.0677	3.70078	0.00228888	0.023359	isradipine	trt_cp	6.66 uM	24 h	Neural Progenitor Cell
Neural Progenitor Cell;sertraline;trt_cp;25 uM;24 h	1286	12	14.6108	5.06622	0.000335285	0.00518334	sertraline	trt_cp	25 uM	24 h	Neural Progenitor Cell
Neural Progenitor Cell;verapamil;trt_cp;1.67 uM;24 h	1286	15	11.7647	4.37448	0.000594793	0.0081363	verapamil	trt_cp	1.67 uM	24 h	Neural Progenitor Cell
Neural Progenitor Cell;tianeptine;trt_cp;60 uM;24 h	1286	14	12.8933	5.65324	6.761e-05	0.00149062	tianeptine	trt_cp	60 uM	24 h	Neural Progenitor Cell
Neural Progenitor Cell;flunarizine;trt_cp;1.67 uM;24 h	1286	13	13.9698	5.4151	0.000139802	0.00263766	flunarizine	trt_cp	1.67 uM	24 h	Neural Progenitor Cell
Neural Progenitor Cell;amitriptyline;trt_cp;6.66 uM;24 h	1286	14	10.762	4.22671	0.000922928	0.0115194	amitriptyline	trt_cp	6.66 uM	24 h	Neural Progenitor Cell
Neural Progenitor Cell;rolipram;trt_cp;1.25 uM;24 h	1286	14	11.3848	3.80762	0.00209078	0.0218154	rolipram	trt_cp	1.25 uM	24 h	Neural Progenitor Cell
Neural Progenitor Cell;lamotrigine;trt_cp;12.5 uM;24 h	1286	15	11.6453	4.72632	0.000295924	0.00469539	lamotrigine	trt_cp	12.5 uM	24 h	Neural Progenitor Cell
Kidney Cell;acivicin;trt_cp;1.25 uM;24 h	1114	3	3.78378	1.16232	0.364531	0.559977	acivicin	trt_cp	1.25 uM	24 h	Kidney Cell
Neural Progenitor Cell;doconexent;trt_cp;6.66 uM;24 h	1286	13	15.8146	5.7852	7.76095e-05	0.00166689	doconexent	trt_cp	6.66 uM	24 h	Neural Progenitor Cell
Neural Progenitor Cell;valproic-acid;trt_cp;320 uM;24 h	1286	12	15.1225	5.46404	0.000178323	0.00319855	valproic-acid	trt_cp	320 uM	24 h	Neural Progenitor Cell
Neural Progenitor Cell;tretinoin;trt_cp;12.5 uM;24 h	1286	15	11.1362	6.13838	1.93344e-05	0.000541136	tretinoin	trt_cp	12.5 uM	24 h	Neural Progenitor Cell
Neural Progenitor Cell;aripiprazole;trt_cp;25 uM;24 h	1286	13	17.6216	8.52712	1.37118e-06	6.23733e-05	aripiprazole	trt_cp	25 uM	24 h	Neural Progenitor Cell
Neural Progenitor Cell;PF-02545920;trt_cp;1.25 uM;24 h	1286	13	14.9504	7.38541	6.25506e-06	0.000216497	PF-02545920	trt_cp	1.25 uM	24 h	Neural Progenitor Cell
Neural Progenitor Cell;lurasidone;trt_cp;6.66 uM;24 h	1286	14	14.7786	6.5308	1.56289e-05	0.000457509	lurasidone	trt_cp	6.66 uM	24 h	Neural Progenitor Cell
Neural Progenitor Cell;LY-2365109;trt_cp;25 uM;24 h	1286	14	12.7419	4.19811	0.000994354	0.012214	LY-2365109	trt_cp	25 uM	24 h	Neural Progenitor Cell
Neural Progenitor Cell;amitriptyline;trt_cp;1.67 uM;24 h	1286	13	11.3899	4.18972	0.00118094	0.0140136	amitriptyline	trt_cp	1.67 uM	24 h	Neural Progenitor Cell
Neural Progenitor Cell;BIX-01294;trt_cp;0.3 uM;24 h	1286	14	13.1384	6.19728	2.62145e-05	0.000692502	BIX-01294	trt_cp	0.3 uM	24 h	Neural Progenitor Cell
Neural Progenitor Cell;BRD-K01543453;trt_cp;25 uM;24 h	1286	12	17.4458	14.8776	1.70969e-09	1.69143e-07	BRD-K01543453	trt_cp	25 uM	24 h	Neural Progenitor Cell
Neural Progenitor Cell;entinostat;trt_cp;1.25 uM;24 h	1286	15	9.38638	7.14867	2.42327e-06	9.8519e-05	entinostat	trt_cp	1.25 uM	24 h	Neural Progenitor Cell
Neural Progenitor Cell;PF-06260933;trt_cp;25 uM;24 h	1286	13	16.2531	7.08803	1.01918e-05	0.000323277	PF-06260933	trt_cp	25 uM	24 h	Neural Progenitor Cell
Neural Progenitor Cell;risperidone;trt_cp;12.5 uM;24 h	1286	15	12.3681	4.5723	0.000404769	0.00598212	risperidone	trt_cp	12.5 uM	24 h	Neural Progenitor Cell
Neural Progenitor Cell;citalopram;trt_cp;1.67 uM;24 h	1286	14	12.7188	5.71021	6.08224e-05	0.00136686	citalopram	trt_cp	1.67 uM	24 h	Neural Progenitor Cell
Epithelial Cell;carbamazepine;trt_cp;100 uM;6 h	585	8	7.06868	1.7328	0.125772	0.30462	carbamazepine	trt_cp	100 uM	6 h	Epithelial Cell
Epithelial Cell;orteronel;trt_cp;40 uM;24 h	4104	3	-3.51353	-0.652344	0.581085	0.734397	orteronel	trt_cp	40 uM	24 h	Epithelial Cell
Epithelial Cell;SB-225002;trt_cp;12 uM;6 h	585	5	-6.1911	-5.51337	0.00196129	0.0207683	SB-225002	trt_cp	12 uM	6 h	Epithelial Cell
Epithelial Cell;valdecoxib;trt_cp;200 uM;6 h	585	3	-3.51151	-1.0813	0.389188	0.581112	valdecoxib	trt_cp	200 uM	6 h	Epithelial Cell
Epithelial Cell;lonidamine;trt_cp;200 uM;6 h	585	5	-4.91834	-3.5426	0.0170293	0.0941749	lonidamine	trt_cp	200 uM	6 h	Epithelial Cell
Epithelial Cell;PF-750;trt_cp;80 uM;6 h	585	5	-4.93648	-3.48892	0.0182565	0.0983147	PF-750	trt_cp	80 uM	6 h	Epithelial Cell
Epithelial Cell;PCI-34051;trt_cp;0.3 uM;6 h	585	4	-12.9942	-8.89924	0.00139751	0.0159912	PCI-34051	trt_cp	0.3 uM	6 h	Epithelial Cell
Epithelial Cell;panobinostat;trt_cp;0.001 uM;6 h	585	3	-12.9291	-4.51791	0.0418584	0.163016	panobinostat	trt_cp	0.001 uM	6 h	Epithelial Cell
Epithelial Cell;BRD-K19826688;trt_cp;1.25 uM;6 h	585	3	-17.3792	-8.5406	0.010066	0.0668701	BRD-K19826688	trt_cp	1.25 uM	6 h	Epithelial Cell
Epithelial Cell;ABT-737;trt_cp;12 uM;6 h	585	5	-1.54056	-1.44865	0.199692	0.395253	ABT-737	trt_cp	12 uM	6 h	Epithelial Cell
Epithelial Cell;dfcl-cys;trt_cp;1000 uM;6 h	585	3	25.9698	7.61568	0.015327	0.0881094	dfcl-cys	trt_cp	1000 uM	6 h	Epithelial Cell
Epithelial Cell;phenacetin;trt_cp;30 uM;6 h	585	3	19.8857	5.86792	0.0257676	0.121637	phenacetin	trt_cp	30 uM	6 h	Epithelial Cell
Epithelial Cell;entinostat;trt_cp;0.3 uM;6 h	585	3	-14.278	-11.4799	0.00272475	0.0265949	entinostat	trt_cp	0.3 uM	6 h	Epithelial Cell
Epithelial Cell;tert-butylhydroquinone;trt_cp;100 uM;24 h	4104	3	34.0174	5.48034	0.0316724	0.138296	tert-butylhydroquinone	trt_cp	100 uM	24 h	Epithelial Cell
Epithelial Cell;tert-butylhydroquinone;trt_cp;1.25 uM;24 h	4104	3	31.1617	3.58456	0.0697431	0.218777	tert-butylhydroquinone	trt_cp	1.25 uM	24 h	Epithelial Cell
Epithelial Cell;pentamidine;trt_cp;320 uM;6 h	585	3	25.1038	4.90872	0.0379695	0.153825	pentamidine	trt_cp	320 uM	6 h	Epithelial Cell
Epithelial Cell;erlotinib;trt_cp;0.3 uM;6 h	585	3	19.6973	5.37431	0.0309644	0.136348	erlotinib	trt_cp	0.3 uM	6 h	Epithelial Cell
Epithelial Cell;paclitaxel;trt_cp;1000 uM;24 h	4104	3	24.9214	19.4729	0.00243724	0.0244867	paclitaxel	trt_cp	1000 uM	24 h	Epithelial Cell
Epithelial Cell;ciprofloxacin;trt_cp;100 uM;6 h	585	3	22.1527	12.3583	0.00405664	0.0355955	ciprofloxacin	trt_cp	100 uM	6 h	Epithelial Cell
Epithelial Cell;colchicine;trt_cp;100 uM;6 h	585	3	22.4612	20.5001	0.000381014	0.00570345	colchicine	trt_cp	100 uM	6 h	Epithelial Cell
Epithelial Cell;furosemide;trt_cp;100 uM;24 h	4104	3	25.8326	10.8357	0.00827542	0.058884	furosemide	trt_cp	100 uM	24 h	Epithelial Cell
Epithelial Cell;erlotinib;trt_cp;100 uM;6 h	585	3	18.109	7.34528	0.0151405	0.0873152	erlotinib	trt_cp	100 uM	6 h	Epithelial Cell
Epithelial Cell;mitomycin;trt_cp;0.3 uM;24 h	4104	3	26.1096	10.5759	0.00869267	0.0607268	mitomycin	trt_cp	0.3 uM	24 h	Epithelial Cell
Epithelial Cell;650_0048_9503;trt_cp;15 uM;24 h	4104	3	-0.62924	-0.443062	0.700541	0.820574	650_0048_9503	trt_cp	15 uM	24 h	Epithelial Cell
Epithelial Cell;BRD-K98948170;trt_cp;1.25 uM;24 h	4104	3	28.9692	9.67201	0.0104213	0.0685395	BRD-K98948170	trt_cp	1.25 uM	24 h	Epithelial Cell
Epithelial Cell;methylparaben;trt_cp;30 uM;24 h	4104	3	21.1365	6.67847	0.0215486	0.109096	methylparaben	trt_cp	30 uM	24 h	Epithelial Cell
Kidney Cell;acivicin;trt_cp;12 uM;24 h	1114	3	5.38749	1.78293	0.215795	0.413694	acivicin	trt_cp	12 uM	24 h	Kidney Cell
Neural Progenitor Cell;clonazepam;trt_cp;25 uM;24 h	1286	13	13.1835	7.08901	9.05973e-06	0.00029357	clonazepam	trt_cp	25 uM	24 h	Neural Progenitor Cell
Neural Progenitor Cell;modafinil;trt_cp;25 uM;24 h	1286	12	14.3053	7.16885	1.36483e-05	0.000409493	modafinil	trt_cp	25 uM	24 h	Neural Progenitor Cell
Neural Progenitor Cell;varenicline;trt_cp;6.66 uM;24 h	1286	15	11.6406	4.54485	0.000423425	0.00620012	varenicline	trt_cp	6.66 uM	24 h	Neural Progenitor Cell
Neural Progenitor Cell;oxiracetam;trt_cp;15 uM;24 h	1286	12	13.2369	4.70206	0.000603024	0.00822955	oxiracetam	trt_cp	15 uM	24 h	Neural Progenitor Cell
Neural Progenitor Cell;varenicline;trt_cp;12.5 uM;24 h	1286	14	12.1449	4.82062	0.000304555	0.00480044	varenicline	trt_cp	12.5 uM	24 h	Neural Progenitor Cell
Neural Progenitor Cell;CHIR-99021;trt_cp;0.3 uM;24 h	1286	15	12.0502	5.48483	6.87092e-05	0.00150724	CHIR-99021	trt_cp	0.3 uM	24 h	Neural Progenitor Cell
Neural Progenitor Cell;fluoxetine;trt_cp;6.66 uM;24 h	1286	13	13.9677	7.44992	5.42639e-06	0.000191613	fluoxetine	trt_cp	6.66 uM	24 h	Neural Progenitor Cell
Neural Progenitor Cell;BRD-A26030894;trt_cp;8 uM;24 h	1286	13	15.0893	6.82609	1.46725e-05	0.000434493	BRD-A26030894	trt_cp	8 uM	24 h	Neural Progenitor Cell
Neural Progenitor Cell;AZD-8055;trt_cp;1.25 uM;24 h	1286	13	10.9653	5.40161	0.000133443	0.00255356	AZD-8055	trt_cp	1.25 uM	24 h	Neural Progenitor Cell
Neural Progenitor Cell;pramipexole;trt_cp;12.5 uM;24 h	1286	14	13.3902	6.32863	2.10893e-05	0.00058406	pramipexole	trt_cp	12.5 uM	24 h	Neural Progenitor Cell
Neural Progenitor Cell;doconexent;trt_cp;50 uM;24 h	1286	6	30.4539	46.6689	7.70988e-12	1.42461e-09	doconexent	trt_cp	50 uM	24 h	Neural Progenitor Cell
Neural Progenitor Cell;PF-06260933;trt_cp;1.67 uM;24 h	1286	13	14.439	8.31137	1.56697e-06	6.91978e-05	PF-06260933	trt_cp	1.67 uM	24 h	Neural Progenitor Cell
Neural Progenitor Cell;PF-02545920;trt_cp;0.3 uM;24 h	1286	14	13.3561	5.96881	3.92223e-05	0.000962985	PF-02545920	trt_cp	0.3 uM	24 h	Neural Progenitor Cell
Neural Progenitor Cell;varenicline;trt_cp;1.67 uM;24 h	1286	14	11.5209	4.54261	0.000509375	0.00717874	varenicline	trt_cp	1.67 uM	24 h	Neural Progenitor Cell
Neural Progenitor Cell;lorazepam;trt_cp;1.67 uM;24 h	1286	14	11.6641	4.94805	0.000238122	0.00396787	lorazepam	trt_cp	1.67 uM	24 h	Neural Progenitor Cell
Neural Progenitor Cell;troglitazone;trt_cp;1.67 uM;24 h	1286	14	12.2031	4.94049	0.000243851	0.00403469	troglitazone	trt_cp	1.67 uM	24 h	Neural Progenitor Cell
Neural Progenitor Cell;olanzapine;trt_cp;12.5 uM;24 h	1286	14	14.3668	5.92893	4.30525e-05	0.00103193	olanzapine	trt_cp	12.5 uM	24 h	Neural Progenitor Cell
Neural Progenitor Cell;simvastatin;trt_cp;12.5 uM;24 h	1286	14	14.6405	5.8843	4.67701e-05	0.00110661	simvastatin	trt_cp	12.5 uM	24 h	Neural Progenitor Cell
Neural Progenitor Cell;tretinoin;trt_cp;1.67 uM;24 h	1286	15	10.0185	4.86617	0.000216711	0.00370445	tretinoin	trt_cp	1.67 uM	24 h	Neural Progenitor Cell
Neural Progenitor Cell;duloxetine;trt_cp;1.67 uM;24 h	1286	13	15.0357	8.04738	2.37767e-06	9.73452e-05	duloxetine	trt_cp	1.67 uM	24 h	Neural Progenitor Cell
Neural Progenitor Cell;roflumilast;trt_cp;1.25 uM;24 h	1286	15	11.1682	4.16271	0.000902423	0.0113202	roflumilast	trt_cp	1.25 uM	24 h	Neural Progenitor Cell
Neural Progenitor Cell;clozapine;trt_cp;25 uM;24 h	1286	14	15.2819	6.56497	1.4963e-05	0.000440602	clozapine	trt_cp	25 uM	24 h	Neural Progenitor Cell
Neural Progenitor Cell;I-BET-151;trt_cp;1.25 uM;24 h	1286	14	16.2	7.62248	2.83228e-06	0.000113042	I-BET-151	trt_cp	1.25 uM	24 h	Neural Progenitor Cell
Neural Progenitor Cell;17-AAG;trt_cp;0.3 uM;24 h	1286	12	15.8452	15.8728	3.16259e-10	3.78243e-08	17-AAG	trt_cp	0.3 uM	24 h	Neural Progenitor Cell
Neural Progenitor Cell;isradipine;trt_cp;12.5 uM;24 h	1286	14	12.612	5.78433	5.31636e-05	0.00122874	isradipine	trt_cp	12.5 uM	24 h	Neural Progenitor Cell
Neural Progenitor Cell;lithium-chloride;trt_cp;320 uM;24 h	1286	12	15.1486	7.47933	9.13529e-06	0.000294812	lithium-chloride	trt_cp	320 uM	24 h	Neural Progenitor Cell
Neural Progenitor Cell;lurasidone;trt_cp;12.5 uM;24 h	1286	13	15.7506	6.79514	1.56726e-05	0.000457878	lurasidone	trt_cp	12.5 uM	24 h	Neural Progenitor Cell
Epithelial Cell;BIBR-1532;trt_cp;80 uM;24 h	4104	3	-6.23984	-1.88914	0.199158	0.394711	BIBR-1532	trt_cp	80 uM	24 h	Epithelial Cell
Epithelial Cell;BRD-K19216856;trt_cp;90 uM;6 h	585	5	-2.55689	-1.73242	0.14631	0.332157	BRD-K19216856	trt_cp	90 uM	6 h	Epithelial Cell
Epithelial Cell;dalcetrapib;trt_cp;80 uM;24 h	4104	3	-2.08492	-0.705983	0.553164	0.713358	dalcetrapib	trt_cp	80 uM	24 h	Epithelial Cell
Epithelial Cell;YM-155;trt_cp;0.3 uM;6 h	585	5	-3.84101	-3.13266	0.0243995	0.117554	YM-155	trt_cp	0.3 uM	6 h	Epithelial Cell
Epithelial Cell;lenalidomide;trt_cp;200 uM;6 h	585	5	-1.5165	-1.32332	0.238578	0.439193	lenalidomide	trt_cp	200 uM	6 h	Epithelial Cell
Epithelial Cell;BRD-K50776152;trt_cp;40 uM;6 h	585	5	-0.383367	-0.187469	0.859653	0.92173	BRD-K50776152	trt_cp	40 uM	6 h	Epithelial Cell
Epithelial Cell;BRD-K83354763;trt_cp;6.66 uM;6 h	585	5	1.1634	0.49056	0.647828	0.784306	BRD-K83354763	trt_cp	6.66 uM	6 h	Epithelial Cell
Epithelial Cell;BRD-K19826688;trt_cp;0.3 uM;6 h	585	4	-10.9849	-3.5025	0.0370836	0.151933	BRD-K19826688	trt_cp	0.3 uM	6 h	Epithelial Cell
Epithelial Cell;phloretin;trt_cp;200 uM;6 h	585	5	-7.50918	-12.2222	1.93418e-09	1.89208e-07	phloretin	trt_cp	200 uM	6 h	Epithelial Cell
Epithelial Cell;sulfamethoxazole;trt_cp;30 uM;24 h	4104	3	20.7442	32.5169	0.000646119	0.00868864	sulfamethoxazole	trt_cp	30 uM	24 h	Epithelial Cell
Epithelial Cell;tcv-cys;trt_cp;1000 uM;6 h	585	3	14.4688	3.94845	0.0559224	0.191925	tcv-cys	trt_cp	1000 uM	6 h	Epithelial Cell
Epithelial Cell;tetracycline;trt_cp;1000 uM;6 h	585	3	11.4363	4.1066	0.0501112	0.180528	tetracycline	trt_cp	1000 uM	6 h	Epithelial Cell
Epithelial Cell;dfcl-cys;trt_cp;1000 uM;24 h	4104	3	17.2258	24.4043	0.00127035	0.0148725	dfcl-cys	trt_cp	1000 uM	24 h	Epithelial Cell
Epithelial Cell;dcv-gsh;trt_cp;30 uM;6 h	585	3	20.0091	8.47305	0.0110554	0.0713643	dcv-gsh	trt_cp	30 uM	6 h	Epithelial Cell
Epithelial Cell;BRD-K61894884;trt_cp;0.3 uM;6 h	585	4	-11.3394	-3.73067	0.0312788	0.137217	BRD-K61894884	trt_cp	0.3 uM	6 h	Epithelial Cell
Epithelial Cell;methotrexate;trt_cp;320 uM;6 h	585	3	18.7591	8.7994	0.0097032	0.0652667	methotrexate	trt_cp	320 uM	6 h	Epithelial Cell
Epithelial Cell;ciprofloxacin;trt_cp;320 uM;6 h	585	3	18.607	7.32512	0.0153866	0.0882924	ciprofloxacin	trt_cp	320 uM	6 h	Epithelial Cell
Epithelial Cell;mitomycin;trt_cp;30 uM;6 h	585	3	23.2095	11.4692	0.00530733	0.0432248	mitomycin	trt_cp	30 uM	6 h	Epithelial Cell
Epithelial Cell;BMS-536924;trt_cp;12 uM;24 h	4104	6	-2.44296	-0.888197	0.414981	0.603748	BMS-536924	trt_cp	12 uM	24 h	Epithelial Cell
Epithelial Cell;BRD-U37528018;trt_cp;30 uM;6 h	585	3	23.1683	5.61498	0.0288075	0.130435	BRD-U37528018	trt_cp	30 uM	6 h	Epithelial Cell
Epithelial Cell;BRD-K68552125;trt_cp;8 uM;24 h	4104	3	9.35337	4.53058	0.0449061	0.169688	BRD-K68552125	trt_cp	8 uM	24 h	Epithelial Cell
Epithelial Cell;BRD-K03614649;trt_cp;15 uM;24 h	4104	3	3.59858	1.07879	0.393271	0.584907	BRD-K03614649	trt_cp	15 uM	24 h	Epithelial Cell
Epithelial Cell;650_0048_9503;trt_cp;0.06 uM;24 h	4104	3	-0.0612697	-0.030533	0.978399	0.988453	650_0048_9503	trt_cp	0.06 uM	24 h	Epithelial Cell
Epithelial Cell;NPC26;trt_cp;1.25 uM;24 h	4104	3	3.27333	16.9848	1.89278e-05	0.000532647	NPC26	trt_cp	1.25 uM	24 h	Epithelial Cell
Neural Progenitor Cell;BRD-A26030894;trt_cp;125 uM;24 h	1286	14	13.1937	5.16767	0.000163158	0.00297078	BRD-A26030894	trt_cp	125 uM	24 h	Neural Progenitor Cell
Neural Progenitor Cell;haloperidol;trt_cp;25 uM;24 h	1286	14	15.8631	6.26455	2.5016e-05	0.000665372	haloperidol	trt_cp	25 uM	24 h	Neural Progenitor Cell
Neural Progenitor Cell;topotecan;trt_cp;1.67 uM;24 h	1286	15	22.7173	9.2194	1.90713e-07	1.11937e-05	topotecan	trt_cp	1.67 uM	24 h	Neural Progenitor Cell
Neural Progenitor Cell;ketamine;trt_cp;6.66 uM;24 h	1286	14	12.6566	6.28532	2.21356e-05	0.000602527	ketamine	trt_cp	6.66 uM	24 h	Neural Progenitor Cell
Neural Progenitor Cell;agomelatine;trt_cp;6.66 uM;24 h	1286	14	12.2559	5.58197	7.5575e-05	0.00162982	agomelatine	trt_cp	6.66 uM	24 h	Neural Progenitor Cell
Neural Progenitor Cell;verapamil;trt_cp;25 uM;24 h	1286	14	14.4906	5.9178	4.40029e-05	0.00105038	verapamil	trt_cp	25 uM	24 h	Neural Progenitor Cell
Neural Progenitor Cell;fluvastatin;trt_cp;25 uM;24 h	1286	14	14.3066	7.28345	4.47935e-06	0.000164147	fluvastatin	trt_cp	25 uM	24 h	Neural Progenitor Cell
Neural Progenitor Cell;olanzapine;trt_cp;25 uM;24 h	1286	13	15.4014	7.95478	2.76854e-06	0.000110751	olanzapine	trt_cp	25 uM	24 h	Neural Progenitor Cell
Neural Progenitor Cell;methylphenidate;trt_cp;12.5 uM;24 h	1286	13	16.0083	8.07959	2.38259e-06	9.7396e-05	methylphenidate	trt_cp	12.5 uM	24 h	Neural Progenitor Cell
Neural Progenitor Cell;BRD-K01543453;trt_cp;12.5 uM;24 h	1286	12	17.9704	18.2175	4.71803e-11	7.16382e-09	BRD-K01543453	trt_cp	12.5 uM	24 h	Neural Progenitor Cell
Neural Progenitor Cell;modafinil;trt_cp;6.66 uM;24 h	1286	11	14.9173	6.33629	7.17224e-05	0.00156157	modafinil	trt_cp	6.66 uM	24 h	Neural Progenitor Cell
Neural Progenitor Cell;entinostat;trt_cp;0.3 uM;24 h	1286	14	12.1193	7.66683	2.08257e-06	8.79439e-05	entinostat	trt_cp	0.3 uM	24 h	Neural Progenitor Cell
Neural Progenitor Cell;sertraline;trt_cp;6.66 uM;24 h	1286	15	15.1986	5.23079	0.000117261	0.00231755	sertraline	trt_cp	6.66 uM	24 h	Neural Progenitor Cell
Neural Progenitor Cell;17-AAG;trt_cp;1.25 uM;24 h	1286	14	13.7879	8.33441	8.24198e-07	4.00326e-05	17-AAG	trt_cp	1.25 uM	24 h	Neural Progenitor Cell
Neural Progenitor Cell;duloxetine;trt_cp;25 uM;24 h	1286	12	15.5832	5.58816	0.00014765	0.00275153	duloxetine	trt_cp	25 uM	24 h	Neural Progenitor Cell
Neural Progenitor Cell;riluzole;trt_cp;1.25 uM;24 h	1286	15	11.9474	4.72514	0.00029799	0.00472388	riluzole	trt_cp	1.25 uM	24 h	Neural Progenitor Cell
Neural Progenitor Cell;BRD-K01543453;trt_cp;6.66 uM;24 h	1286	15	12.9628	5.22361	0.000115278	0.00228224	BRD-K01543453	trt_cp	6.66 uM	24 h	Neural Progenitor Cell
Neural Progenitor Cell;LY-2365109;trt_cp;1.67 uM;24 h	1286	13	13.0707	5.01308	0.000275385	0.00442783	LY-2365109	trt_cp	1.67 uM	24 h	Neural Progenitor Cell
Epithelial Cell;fumonisin-b1;trt_cp;150 uM;24 h	4104	3	-1.82498	-0.383208	0.738425	0.846925	fumonisin-b1	trt_cp	150 uM	24 h	Epithelial Cell
Epithelial Cell;DG-041;trt_cp;40 uM;6 h	585	5	-5.206	-3.91485	0.0112131	0.0719743	DG-041	trt_cp	40 uM	6 h	Epithelial Cell
Epithelial Cell;SB-225002;trt_cp;12 uM;24 h	4104	3	-10.4449	-4.88339	0.0390183	0.156445	SB-225002	trt_cp	12 uM	24 h	Epithelial Cell
Epithelial Cell;ASN-05257430;trt_cp;12 uM;6 h	585	5	-2.48076	-1.34491	0.242705	0.443467	ASN-05257430	trt_cp	12 uM	6 h	Epithelial Cell
Epithelial Cell;indometacin;trt_cp;320 uM;6 h	585	3	18.7766	4.51024	0.0439852	0.167652	indometacin	trt_cp	320 uM	6 h	Epithelial Cell
Epithelial Cell;diatrizoic-acid;trt_cp;320000 uM;6 h	585	3	18.6961	5.53068	0.0289491	0.130788	diatrizoic-acid	trt_cp	320000 uM	6 h	Epithelial Cell
Epithelial Cell;BRD-A13806944;trt_cp;30 uM;6 h	585	3	18.0026	17.5285	0.000438446	0.00635875	BRD-A13806944	trt_cp	30 uM	6 h	Epithelial Cell
Epithelial Cell;BRD-A20239487;trt_cp;100 uM;6 h	585	3	18.6876	10.8329	0.00524002	0.042828	BRD-A20239487	trt_cp	100 uM	6 h	Epithelial Cell
Epithelial Cell;BRD-A38479395;trt_cp;100 uM;24 h	4104	3	33.6274	23.9134	0.00163047	0.0180707	BRD-A38479395	trt_cp	100 uM	24 h	Epithelial Cell
Epithelial Cell;sunitinib;trt_cp;30 uM;6 h	585	3	18.4947	6.50731	0.0202382	0.104985	sunitinib	trt_cp	30 uM	6 h	Epithelial Cell
Neural Progenitor Cell;EPZ-005687;trt_cp;6.66 uM;6 h	73	3	-4.65256	-0.858225	0.4692	0.647893	EPZ-005687	trt_cp	6.66 uM	6 h	Neural Progenitor Cell
Epithelial Cell;furosemide;trt_cp;100 uM;6 h	585	3	19.4326	7.6984	0.0138562	0.0826907	furosemide	trt_cp	100 uM	6 h	Epithelial Cell
Epithelial Cell;BRD-K03614649;trt_cp;0.5 uM;24 h	4104	3	1.30953	1.69979	0.225812	0.425619	BRD-K03614649	trt_cp	0.5 uM	24 h	Epithelial Cell
Neural Progenitor Cell;PF-06260933;trt_cp;6.66 uM;24 h	1286	14	12.4208	5.83133	4.86368e-05	0.00114167	PF-06260933	trt_cp	6.66 uM	24 h	Neural Progenitor Cell
Neural Progenitor Cell;oxiracetam;trt_cp;30 uM;24 h	1286	13	14.6451	7.27032	7.34218e-06	0.000247024	oxiracetam	trt_cp	30 uM	24 h	Neural Progenitor Cell
Neural Progenitor Cell;ketamine;trt_cp;25 uM;24 h	1286	14	11.1295	4.60776	0.000447405	0.00646183	ketamine	trt_cp	25 uM	24 h	Neural Progenitor Cell
Neural Progenitor Cell;BRD-A26030894;trt_cp;250 uM;24 h	1286	13	14.0187	5.14946	0.000220245	0.00374684	BRD-A26030894	trt_cp	250 uM	24 h	Neural Progenitor Cell
Neural Progenitor Cell;sertraline;trt_cp;12.5 uM;24 h	1286	14	16.9815	5.21522	0.000156174	0.00287359	sertraline	trt_cp	12.5 uM	24 h	Neural Progenitor Cell
Neural Progenitor Cell;lithium-chloride;trt_cp;1250 uM;24 h	1286	13	15.1836	8.26822	1.74688e-06	7.56904e-05	lithium-chloride	trt_cp	1250 uM	24 h	Neural Progenitor Cell
Neural Progenitor Cell;agomelatine;trt_cp;1.67 uM;24 h	1286	14	10.6288	4.6302	0.000424836	0.00621296	agomelatine	trt_cp	1.67 uM	24 h	Neural Progenitor Cell
Neural Progenitor Cell;fluoxetine;trt_cp;25 uM;24 h	1286	15	14.1863	5.51438	6.79426e-05	0.00149335	fluoxetine	trt_cp	25 uM	24 h	Neural Progenitor Cell
Neural Progenitor Cell;BIX-01294;trt_cp;1.25 uM;24 h	1286	14	13.5991	6.08148	3.24629e-05	0.000828124	BIX-01294	trt_cp	1.25 uM	24 h	Neural Progenitor Cell
Neural Progenitor Cell;flunarizine;trt_cp;6.66 uM;24 h	1286	13	15.3929	7.55552	4.94911e-06	0.000178	flunarizine	trt_cp	6.66 uM	24 h	Neural Progenitor Cell
Neural Progenitor Cell;olanzapine;trt_cp;1.67 uM;24 h	1286	13	12.9687	5.0441	0.000260479	0.00424881	olanzapine	trt_cp	1.67 uM	24 h	Neural Progenitor Cell
Neural Progenitor Cell;methylphenidate;trt_cp;25 uM;24 h	1286	14	14.5197	5.53455	8.61505e-05	0.00180266	methylphenidate	trt_cp	25 uM	24 h	Neural Progenitor Cell
Neural Progenitor Cell;ziprasidone;trt_cp;1.67 uM;24 h	1286	12	14.2096	5.16078	0.000286221	0.00456425	ziprasidone	trt_cp	1.67 uM	24 h	Neural Progenitor Cell
Neural Progenitor Cell;lamotrigine;trt_cp;6.66 uM;24 h	1286	14	12.9688	6.14155	2.87115e-05	0.000747161	lamotrigine	trt_cp	6.66 uM	24 h	Neural Progenitor Cell
Neural Progenitor Cell;BRD-A90543464;trt_cp;150 uM;24 h	1286	14	13.9971	4.8014	0.000322959	0.00502169	BRD-A90543464	trt_cp	150 uM	24 h	Neural Progenitor Cell
Neural Progenitor Cell;isradipine;trt_cp;1.67 uM;24 h	1286	14	11.8497	5.46006	9.31834e-05	0.00192445	isradipine	trt_cp	1.67 uM	24 h	Neural Progenitor Cell
Neural Progenitor Cell;lithium-chloride;trt_cp;625 uM;24 h	1286	10	15.5724	5.79038	0.000234925	0.00392925	lithium-chloride	trt_cp	625 uM	24 h	Neural Progenitor Cell
Neural Progenitor Cell;fluoxetine;trt_cp;12.5 uM;24 h	1286	14	14.7621	6.53599	1.54872e-05	0.000454122	fluoxetine	trt_cp	12.5 uM	24 h	Neural Progenitor Cell
Neural Progenitor Cell;doconexent;trt_cp;25 uM;24 h	1286	9	21.9864	19.4576	5.71174e-09	4.99246e-07	doconexent	trt_cp	25 uM	24 h	Neural Progenitor Cell
Neural Progenitor Cell;pramipexole;trt_cp;25 uM;24 h	1286	13	12.6064	4.87396	0.000349209	0.00534653	pramipexole	trt_cp	25 uM	24 h	Neural Progenitor Cell
Neural Progenitor Cell;aripiprazole;trt_cp;6.66 uM;24 h	1286	14	13.1051	6.08093	3.20367e-05	0.000819646	aripiprazole	trt_cp	6.66 uM	24 h	Neural Progenitor Cell
Neural Progenitor Cell;valproic-acid;trt_cp;1250 uM;24 h	1286	15	15.7727	9.24785	1.33472e-07	8.29404e-06	valproic-acid	trt_cp	1250 uM	24 h	Neural Progenitor Cell
Neural Progenitor Cell;BG-1005;trt_cp;0.3 uM;24 h	1286	15	13.215	9.94143	3.31139e-08	2.37461e-06	BG-1005	trt_cp	0.3 uM	24 h	Neural Progenitor Cell
Neural Progenitor Cell;doconexent;trt_cp;12.5 uM;24 h	1286	13	16.1929	6.08387	4.81423e-05	0.0011337	doconexent	trt_cp	12.5 uM	24 h	Neural Progenitor Cell
Epithelial Cell;BRD-K09907482;trt_cp;40 uM;6 h	585	4	-3.93735	-2.57323	0.0695813	0.218502	BRD-K09907482	trt_cp	40 uM	6 h	Epithelial Cell
Epithelial Cell;parbendazole;trt_cp;0.3 uM;6 h	585	5	-5.00392	-2.45109	0.0648238	0.209607	parbendazole	trt_cp	0.3 uM	6 h	Epithelial Cell
Epithelial Cell;TGX-115;trt_cp;150 uM;6 h	585	5	-5.96108	-6.02324	0.00087887	0.0110986	TGX-115	trt_cp	150 uM	6 h	Epithelial Cell
Epithelial Cell;vorinostat;trt_cp;0.02 uM;6 h	585	4	-12.2851	-5.66002	0.00873634	0.0609249	vorinostat	trt_cp	0.02 uM	6 h	Epithelial Cell
Epithelial Cell;NSC-23766;trt_cp;150 uM;6 h	585	5	-2.61032	-1.45458	0.211638	0.408797	NSC-23766	trt_cp	150 uM	6 h	Epithelial Cell
Epithelial Cell;BRD-K26510616;trt_cp;0.3 uM;6 h	585	5	-12.5639	-9.7898	0.000170396	0.00308489	BRD-K26510616	trt_cp	0.3 uM	6 h	Epithelial Cell
Epithelial Cell;afatinib;trt_cp;0.3 uM;24 h	4104	3	21.7268	8.30111	0.0140428	0.083282	afatinib	trt_cp	0.3 uM	24 h	Epithelial Cell
Epithelial Cell;BRD-U12060954;trt_cp;320 uM;6 h	585	3	18.6817	9.45588	0.00792886	0.0570457	BRD-U12060954	trt_cp	320 uM	6 h	Epithelial Cell
Epithelial Cell;citrinin;trt_cp;1000 uM;24 h	4104	3	20.0865	12.4314	0.0061705	0.0481332	citrinin	trt_cp	1000 uM	24 h	Epithelial Cell
Epithelial Cell;phenacetin;trt_cp;100 uM;6 h	585	3	20.3673	3.62691	0.0671107	0.21392	phenacetin	trt_cp	100 uM	6 h	Epithelial Cell
Epithelial Cell;paraquat;trt_cp;30 uM;6 h	585	3	15.8171	9.34887	0.00715487	0.053284	paraquat	trt_cp	30 uM	6 h	Epithelial Cell
Epithelial Cell;rifampicin;trt_cp;1000 uM;6 h	585	3	16.5086	8.933	0.00854711	0.0601447	rifampicin	trt_cp	1000 uM	6 h	Epithelial Cell
Epithelial Cell;citrinin;trt_cp;100 uM;6 h	585	3	19.5394	6.18361	0.0229409	0.113223	citrinin	trt_cp	100 uM	6 h	Epithelial Cell
Epithelial Cell;BRD-K64024097;trt_cp;1.25 uM;6 h	585	4	-13.1785	-14.955	1.75247e-05	0.000502474	BRD-K64024097	trt_cp	1.25 uM	6 h	Epithelial Cell
Epithelial Cell;BRD-K35832492;trt_cp;1.25 uM;6 h	585	5	-9.45696	-4.33222	0.0103228	0.0680838	BRD-K35832492	trt_cp	1.25 uM	6 h	Epithelial Cell
Epithelial Cell;ibuprofen;trt_cp;1000 uM;6 h	585	3	15.3539	3.58148	0.0677969	0.215162	ibuprofen	trt_cp	1000 uM	6 h	Epithelial Cell
Epithelial Cell;citrinin;trt_cp;320 uM;24 h	4104	3	17.8925	21.3554	0.00181802	0.0195959	citrinin	trt_cp	320 uM	24 h	Epithelial Cell
Epithelial Cell;citrinin;trt_cp;100 uM;24 h	4104	3	32.6449	12.7927	0.0059628	0.0469747	citrinin	trt_cp	100 uM	24 h	Epithelial Cell
Epithelial Cell;BRD-U12060954;trt_cp;30 uM;6 h	585	3	22.0656	19.7497	0.000459823	0.00661384	BRD-U12060954	trt_cp	30 uM	6 h	Epithelial Cell
Epithelial Cell;pentamidine;trt_cp;30 uM;6 h	585	3	25.1969	6.71951	0.0199953	0.104341	pentamidine	trt_cp	30 uM	6 h	Epithelial Cell
Epithelial Cell;omeprazole;trt_cp;320 uM;24 h	4104	3	20.7771	9.27424	0.0112386	0.0720422	omeprazole	trt_cp	320 uM	24 h	Epithelial Cell
Epithelial Cell;614_6900_7557;trt_cp;1.67 uM;24 h	4104	3	2.76773	1.14766	0.369413	0.564422	614_6900_7557	trt_cp	1.67 uM	24 h	Epithelial Cell
Epithelial Cell;620_7033_4267;trt_cp;1.25 uM;24 h	4104	3	3.0897	2.47766	0.129433	0.309705	620_7033_4267	trt_cp	1.25 uM	24 h	Epithelial Cell
Epithelial Cell;620_7033_4267;trt_cp;0.5 uM;24 h	4104	3	2.30875	1.02999	0.410798	0.600163	620_7033_4267	trt_cp	0.5 uM	24 h	Epithelial Cell
Epithelial Cell;colchicine;trt_cp;1000 uM;6 h	585	3	30.6012	7.44878	0.0164905	0.0922521	colchicine	trt_cp	1000 uM	6 h	Epithelial Cell
Epithelial Cell;BRD-A20239487;trt_cp;320 uM;24 h	4104	3	19.1002	5.22739	0.0345583	0.146176	BRD-A20239487	trt_cp	320 uM	24 h	Epithelial Cell
Epithelial Cell;mannitol;trt_cp;320 uM;24 h	4104	3	25.1758	7.46148	0.0173807	0.0953931	mannitol	trt_cp	320 uM	24 h	Epithelial Cell
Epithelial Cell;omeprazole;trt_cp;30 uM;24 h	4104	3	25.1837	20.1579	0.00226387	0.0231851	omeprazole	trt_cp	30 uM	24 h	Epithelial Cell
Epithelial Cell;DPI-201106;trt_cp;1.25 uM;24 h	4104	3	0.71394	0.406883	0.723211	0.836453	DPI-201106	trt_cp	1.25 uM	24 h	Epithelial Cell
Epithelial Cell;NSC-4644;trt_cp;0.06 uM;24 h	4104	3	0.729071	0.333294	0.770457	0.867146	NSC-4644	trt_cp	0.06 uM	24 h	Epithelial Cell
Neural Progenitor Cell;lorazepam;trt_cp;6.66 uM;24 h	1286	15	11.8048	5.65439	4.94514e-05	0.00115595	lorazepam	trt_cp	6.66 uM	24 h	Neural Progenitor Cell
Neural Progenitor Cell;clozapine;trt_cp;6.66 uM;24 h	1286	13	13.5496	5.03531	0.000266691	0.00432991	clozapine	trt_cp	6.66 uM	24 h	Neural Progenitor Cell
Neural Progenitor Cell;lurasidone;trt_cp;25 uM;24 h	1286	15	14.2461	5.34848	9.28279e-05	0.00192052	lurasidone	trt_cp	25 uM	24 h	Neural Progenitor Cell
Neural Progenitor Cell;valproic-acid;trt_cp;625 uM;24 h	1286	15	14.9969	6.6339	9.14244e-06	0.000294812	valproic-acid	trt_cp	625 uM	24 h	Neural Progenitor Cell
Neural Progenitor Cell;PF-06260933;trt_cp;12.5 uM;24 h	1286	15	12.7086	5.01733	0.000170615	0.00308698	PF-06260933	trt_cp	12.5 uM	24 h	Neural Progenitor Cell
Neural Progenitor Cell;lamotrigine;trt_cp;25 uM;24 h	1286	15	11.3408	5.09242	0.000143669	0.00269172	lamotrigine	trt_cp	25 uM	24 h	Neural Progenitor Cell
Neural Progenitor Cell;flunarizine;trt_cp;12.5 uM;24 h	1286	13	14.7419	5.44565	0.000134311	0.00256315	flunarizine	trt_cp	12.5 uM	24 h	Neural Progenitor Cell
Neural Progenitor Cell;BRD-K89997465;trt_cp;12.5 uM;24 h	1286	12	13.1775	6.78027	2.28676e-05	0.000618596	BRD-K89997465	trt_cp	12.5 uM	24 h	Neural Progenitor Cell
Neural Progenitor Cell;citalopram;trt_cp;6.66 uM;24 h	1286	11	12.5776	11.6834	6.06363e-08	4.08803e-06	citalopram	trt_cp	6.66 uM	24 h	Neural Progenitor Cell
Neural Progenitor Cell;tacedinaline;trt_cp;1.25 uM;24 h	1286	15	11.7995	6.61733	8.27076e-06	0.000273005	tacedinaline	trt_cp	1.25 uM	24 h	Neural Progenitor Cell
Neural Progenitor Cell;risperidone;trt_cp;6.66 uM;24 h	1286	15	12.1772	4.40004	0.000567858	0.00782917	risperidone	trt_cp	6.66 uM	24 h	Neural Progenitor Cell
Neural Progenitor Cell;simvastatin;trt_cp;25 uM;24 h	1286	14	14.358	6.01212	3.72789e-05	0.000925295	simvastatin	trt_cp	25 uM	24 h	Neural Progenitor Cell
Neural Progenitor Cell;olanzapine;trt_cp;6.66 uM;24 h	1286	14	13.5525	5.37016	0.000113734	0.00226265	olanzapine	trt_cp	6.66 uM	24 h	Neural Progenitor Cell
Neural Progenitor Cell;troglitazone;trt_cp;6.66 uM;24 h	1286	14	11.5398	4.30408	0.000802911	0.0103126	troglitazone	trt_cp	6.66 uM	24 h	Neural Progenitor Cell
Neural Progenitor Cell;risperidone;trt_cp;1.67 uM;24 h	1286	13	15.1183	7.32428	6.89892e-06	0.000235514	risperidone	trt_cp	1.67 uM	24 h	Neural Progenitor Cell
Neural Progenitor Cell;quetiapine;trt_cp;6.66 uM;24 h	1286	14	12.9978	5.88664	4.48542e-05	0.00106633	quetiapine	trt_cp	6.66 uM	24 h	Neural Progenitor Cell
Neural Progenitor Cell;BRD-A26030894;trt_cp;60 uM;24 h	1286	14	13.4965	6.02843	3.54904e-05	0.000889119	BRD-A26030894	trt_cp	60 uM	24 h	Neural Progenitor Cell
Neural Progenitor Cell;clozapine;trt_cp;12.5 uM;24 h	1286	13	13.7249	5.49307	0.000122016	0.00238989	clozapine	trt_cp	12.5 uM	24 h	Neural Progenitor Cell
Epithelial Cell;sildenafil;trt_cp;150 uM;6 h	585	5	-6.41774	-6.12759	0.000967128	0.01196	sildenafil	trt_cp	150 uM	6 h	Epithelial Cell
Epithelial Cell;VER-155008;trt_cp;12 uM;6 h	585	5	-4.69243	-2.50733	0.0598198	0.199951	VER-155008	trt_cp	12 uM	6 h	Epithelial Cell
Epithelial Cell;methotrexate;trt_cp;320 uM;24 h	4104	3	30.6174	30.3862	0.000935499	0.0116348	methotrexate	trt_cp	320 uM	24 h	Epithelial Cell
Epithelial Cell;tcv-cys;trt_cp;100 uM;6 h	585	3	17.1579	7.67054	0.0132945	0.0803679	tcv-cys	trt_cp	100 uM	6 h	Epithelial Cell
Epithelial Cell;BRD-A13806944;trt_cp;320 uM;6 h	585	3	17.2607	4.48822	0.0440858	0.16786	BRD-A13806944	trt_cp	320 uM	6 h	Epithelial Cell
Epithelial Cell;mannitol;trt_cp;100 uM;24 h	4104	3	23.8151	20.7042	0.00211321	0.0220035	mannitol	trt_cp	100 uM	24 h	Epithelial Cell
Epithelial Cell;indometacin;trt_cp;320 uM;24 h	4104	3	15.9254	9.81989	0.00988026	0.0660632	indometacin	trt_cp	320 uM	24 h	Epithelial Cell
Epithelial Cell;paclitaxel;trt_cp;100 uM;6 h	585	3	17.442	33.3398	5.7084e-19	3.98709e-16	paclitaxel	trt_cp	100 uM	6 h	Epithelial Cell
Epithelial Cell;potassium-dichromate;trt_cp;0.3 uM;24 h	4104	3	23.3113	6.88082	0.0203528	0.10523	potassium-dichromate	trt_cp	0.3 uM	24 h	Epithelial Cell
Epithelial Cell;mitomycin;trt_cp;0.3 uM;6 h	585	3	22.3678	9.4935	0.00869807	0.0607268	mitomycin	trt_cp	0.3 uM	6 h	Epithelial Cell
Epithelial Cell;sirolimus;trt_cp;100 uM;24 h	4104	3	16.8332	14.5936	0.0042997	0.0371311	sirolimus	trt_cp	100 uM	24 h	Epithelial Cell
Epithelial Cell;fluorouracil;trt_cp;30 uM;6 h	585	3	18.7146	3.07357	0.0904045	0.253465	fluorouracil	trt_cp	30 uM	6 h	Epithelial Cell
Epithelial Cell;sorafenib;trt_cp;30 uM;24 h	4104	3	20.9556	5.87922	0.0276002	0.126971	sorafenib	trt_cp	30 uM	24 h	Epithelial Cell
Epithelial Cell;650_0048_9503;trt_cp;1.67 uM;24 h	4104	3	2.37405	1.73403	0.223307	0.42252	650_0048_9503	trt_cp	1.67 uM	24 h	Epithelial Cell
Epithelial Cell;650_0048_9503;trt_cp;0.5 uM;24 h	4104	3	1.9229	0.874896	0.473463	0.65107	650_0048_9503	trt_cp	0.5 uM	24 h	Epithelial Cell
Epithelial Cell;NPC26;trt_cp;0.5 uM;24 h	4104	3	1.988	1.62928	0.242653	0.443466	NPC26	trt_cp	0.5 uM	24 h	Epithelial Cell
Epithelial Cell;NSC-4644;trt_cp;1.67 uM;24 h	4104	3	0.648365	0.629613	0.591898	0.741983	NSC-4644	trt_cp	1.67 uM	24 h	Epithelial Cell
Neural Progenitor Cell;topiramate;trt_cp;12.5 uM;24 h	1286	15	11.6612	4.68306	0.000322327	0.00501632	topiramate	trt_cp	12.5 uM	24 h	Neural Progenitor Cell
Neural Progenitor Cell;tretinoin;trt_cp;25 uM;24 h	1286	15	11.1358	6.08518	2.13651e-05	0.000588433	tretinoin	trt_cp	25 uM	24 h	Neural Progenitor Cell
Neural Progenitor Cell;zopiclone;trt_cp;6.66 uM;24 h	1286	15	12.3463	4.84528	0.000236944	0.00395545	zopiclone	trt_cp	6.66 uM	24 h	Neural Progenitor Cell
Neural Progenitor Cell;zopiclone;trt_cp;1.67 uM;24 h	1286	14	13.6981	5.56529	8.04368e-05	0.00171286	zopiclone	trt_cp	1.67 uM	24 h	Neural Progenitor Cell
Neural Progenitor Cell;BRD-K89997465;trt_cp;6.66 uM;24 h	1286	13	14.9292	7.63431	4.31959e-06	0.000160482	BRD-K89997465	trt_cp	6.66 uM	24 h	Neural Progenitor Cell
Neural Progenitor Cell;clonazepam;trt_cp;12.5 uM;24 h	1286	13	12.1677	5.7122	8.12511e-05	0.00172619	clonazepam	trt_cp	12.5 uM	24 h	Neural Progenitor Cell
Neural Progenitor Cell;quetiapine;trt_cp;12.5 uM;24 h	1286	14	12.5508	5.88374	4.45033e-05	0.00106088	quetiapine	trt_cp	12.5 uM	24 h	Neural Progenitor Cell
Neural Progenitor Cell;troglitazone;trt_cp;25 uM;24 h	1286	13	13.8619	7.10736	9.09952e-06	0.000294516	troglitazone	trt_cp	25 uM	24 h	Neural Progenitor Cell
Neural Progenitor Cell;aripiprazole;trt_cp;12.5 uM;24 h	1286	13	16.3144	8.31849	1.72622e-06	7.4981e-05	aripiprazole	trt_cp	12.5 uM	24 h	Neural Progenitor Cell
Neural Progenitor Cell;vorinostat;trt_cp;0.3 uM;24 h	1286	15	13.3626	7.26379	2.86912e-06	0.000114382	vorinostat	trt_cp	0.3 uM	24 h	Neural Progenitor Cell
Neural Progenitor Cell;methylphenidate;trt_cp;1.67 uM;24 h	1286	14	13.7663	5.64559	6.98521e-05	0.00152943	methylphenidate	trt_cp	1.67 uM	24 h	Neural Progenitor Cell
Neural Progenitor Cell;BRD-K01543453;trt_cp;1.67 uM;24 h	1286	14	13.5222	5.86506	4.72176e-05	0.00111493	BRD-K01543453	trt_cp	1.67 uM	24 h	Neural Progenitor Cell
Neural Progenitor Cell;oxiracetam;trt_cp;60 uM;24 h	1286	13	12.6551	5.28963	0.000169235	0.00306568	oxiracetam	trt_cp	60 uM	24 h	Neural Progenitor Cell
Neural Progenitor Cell;fluoxetine;trt_cp;1.67 uM;24 h	1286	14	12.1572	5.22964	0.000142937	0.00268376	fluoxetine	trt_cp	1.67 uM	24 h	Neural Progenitor Cell
Epithelial Cell;BRD-K40758391;trt_cp;40 uM;6 h	585	5	-0.381978	-0.22815	0.829331	0.903373	BRD-K40758391	trt_cp	40 uM	6 h	Epithelial Cell
Epithelial Cell;BRD-A94451536;trt_cp;40 uM;6 h	585	5	-2.13931	-4.47726	1.84903e-05	0.000524988	BRD-A94451536	trt_cp	40 uM	6 h	Epithelial Cell
Epithelial Cell;thiazolopyrimidine;trt_cp;40 uM;6 h	585	5	-4.57609	-2.26765	0.0799503	0.236359	thiazolopyrimidine	trt_cp	40 uM	6 h	Epithelial Cell
Epithelial Cell;GW-405833;trt_cp;40 uM;6 h	585	5	-7.55105	-5.10327	0.0042571	0.0368361	GW-405833	trt_cp	40 uM	6 h	Epithelial Cell
Epithelial Cell;T-5345967;trt_cp;150 uM;6 h	585	5	-3.9503	-2.71242	0.0438544	0.167436	T-5345967	trt_cp	150 uM	6 h	Epithelial Cell
Epithelial Cell;BRD-K01621458;trt_cp;0.3 uM;6 h	585	3	-10.3048	-3.0305	0.0901305	0.253059	BRD-K01621458	trt_cp	0.3 uM	6 h	Epithelial Cell
Epithelial Cell;panobinostat;trt_cp;0.02 uM;6 h	585	5	-10.9659	-8.03357	0.000508369	0.00717188	panobinostat	trt_cp	0.02 uM	6 h	Epithelial Cell
Epithelial Cell;BRD-K35832492;trt_cp;0.3 uM;6 h	585	3	-12.3477	-3.49084	0.0700521	0.219312	BRD-K35832492	trt_cp	0.3 uM	6 h	Epithelial Cell
Epithelial Cell;BRD-K84924563;trt_cp;40 uM;6 h	585	5	-2.27506	-1.68147	0.153901	0.342329	BRD-K84924563	trt_cp	40 uM	6 h	Epithelial Cell
Epithelial Cell;ibuprofen;trt_cp;100 uM;6 h	585	3	16.5467	5.1202	0.0334513	0.143493	ibuprofen	trt_cp	100 uM	6 h	Epithelial Cell
Epithelial Cell;sulfamethoxazole;trt_cp;1000 uM;6 h	585	3	16.6023	8.78865	0.00900437	0.0620567	sulfamethoxazole	trt_cp	1000 uM	6 h	Epithelial Cell
Epithelial Cell;colchicine;trt_cp;30 uM;6 h	585	3	19.3988	8.11688	0.0121557	0.0758468	colchicine	trt_cp	30 uM	6 h	Epithelial Cell
Epithelial Cell;ciprofloxacin;trt_cp;30 uM;24 h	4104	3	23.664	12.223	0.00645618	0.0497066	ciprofloxacin	trt_cp	30 uM	24 h	Epithelial Cell
Epithelial Cell;ibuprofen;trt_cp;30 uM;6 h	585	3	16.4802	13.1224	0.00198351	0.0209592	ibuprofen	trt_cp	30 uM	6 h	Epithelial Cell
Epithelial Cell;paraquat;trt_cp;320 uM;6 h	585	3	21.4013	10.0365	0.00732733	0.054077	paraquat	trt_cp	320 uM	6 h	Epithelial Cell
Epithelial Cell;BRD-K13959223;trt_cp;30 uM;6 h	585	3	18.4411	4.49257	0.044263	0.16827	BRD-K13959223	trt_cp	30 uM	6 h	Epithelial Cell
Epithelial Cell;carbamazepine;trt_cp;30 uM;24 h	4104	3	22.979	11.6089	0.00716261	0.0532893	carbamazepine	trt_cp	30 uM	24 h	Epithelial Cell
Epithelial Cell;fluorouracil;trt_cp;320 uM;24 h	4104	3	27.4204	13.201	0.00555677	0.0446952	fluorouracil	trt_cp	320 uM	24 h	Epithelial Cell
Epithelial Cell;pioglitazone;trt_cp;30 uM;24 h	4104	3	21.0268	12.7416	0.00588297	0.0464716	pioglitazone	trt_cp	30 uM	24 h	Epithelial Cell
Epithelial Cell;colchicine;trt_cp;320 uM;24 h	4104	3	23.9433	53.7384	0.000132406	0.00253739	colchicine	trt_cp	320 uM	24 h	Epithelial Cell
Epithelial Cell;diatrizoic-acid;trt_cp;320000 uM;24 h	4104	3	18.3194	4.72668	0.0418209	0.162901	diatrizoic-acid	trt_cp	320000 uM	24 h	Epithelial Cell
Epithelial Cell;BRD-A44174994;trt_cp;30 uM;24 h	4104	3	22.4109	6.94363	0.0199842	0.104305	BRD-A44174994	trt_cp	30 uM	24 h	Epithelial Cell
Epithelial Cell;pioglitazone;trt_cp;30 uM;6 h	585	3	24.9311	7.33995	0.0164946	0.0922536	pioglitazone	trt_cp	30 uM	6 h	Epithelial Cell
Neural Progenitor Cell;doconexent;trt_cp;100 uM;24 h	1286	6	-2.88186	-1.35528	0.230822	0.430632	doconexent	trt_cp	100 uM	24 h	Neural Progenitor Cell
Neural Progenitor Cell;fluvastatin;trt_cp;6.66 uM;24 h	1286	13	15.0957	7.08522	9.8792e-06	0.000315367	fluvastatin	trt_cp	6.66 uM	24 h	Neural Progenitor Cell
Neural Progenitor Cell;LY-2365109;trt_cp;12.5 uM;24 h	1286	15	13.0445	4.92204	0.000206134	0.00356907	LY-2365109	trt_cp	12.5 uM	24 h	Neural Progenitor Cell
Neural Progenitor Cell;verapamil;trt_cp;12.5 uM;24 h	1286	14	11.9629	4.24861	0.000896821	0.011262	verapamil	trt_cp	12.5 uM	24 h	Neural Progenitor Cell
Neural Progenitor Cell;oxiracetam;trt_cp;8 uM;24 h	1286	13	12.819	5.28047	0.000172471	0.00310956	oxiracetam	trt_cp	8 uM	24 h	Neural Progenitor Cell
Neural Progenitor Cell;agomelatine;trt_cp;25 uM;24 h	1286	14	12.4321	5.66209	6.57694e-05	0.00145949	agomelatine	trt_cp	25 uM	24 h	Neural Progenitor Cell
Neural Progenitor Cell;valproic-acid;trt_cp;150 uM;24 h	1286	12	16.1766	8.54193	2.31747e-06	9.52542e-05	valproic-acid	trt_cp	150 uM	24 h	Neural Progenitor Cell
Neural Progenitor Cell;modafinil;trt_cp;1.67 uM;24 h	1286	13	14.6289	8.2616	1.70481e-06	7.42359e-05	modafinil	trt_cp	1.67 uM	24 h	Neural Progenitor Cell
Neural Progenitor Cell;lurasidone;trt_cp;1.67 uM;24 h	1286	15	12.527	4.65347	0.000345688	0.00531124	lurasidone	trt_cp	1.67 uM	24 h	Neural Progenitor Cell
Epithelial Cell;BRD-K10436544;trt_cp;0.3 uM;6 h	585	4	-11.3556	-2.38398	0.0958415	0.261838	BRD-K10436544	trt_cp	0.3 uM	6 h	Epithelial Cell
Epithelial Cell;PCI-34051;trt_cp;0.3 uM;24 h	4104	3	1.14571	0.531941	0.647678	0.784197	PCI-34051	trt_cp	0.3 uM	24 h	Epithelial Cell
Epithelial Cell;mannitol;trt_cp;100 uM;6 h	585	3	16.0495	13.8282	0.00138901	0.0159148	mannitol	trt_cp	100 uM	6 h	Epithelial Cell
Epithelial Cell;BRD-A91712064;trt_cp;0.3 uM;24 h	4104	3	10.1353	3.008	0.0947638	0.26034	BRD-A91712064	trt_cp	0.3 uM	24 h	Epithelial Cell
Epithelial Cell;tetracycline;trt_cp;100 uM;24 h	4104	3	13.1809	3.97664	0.0575814	0.195614	tetracycline	trt_cp	100 uM	24 h	Epithelial Cell
Neural Progenitor Cell;BMS-906024;trt_cp;0.5 uM;6 h	73	3	-4.72297	-2.74079	0.0102414	0.0677	BMS-906024	trt_cp	0.5 uM	6 h	Neural Progenitor Cell
Epithelial Cell;penitrem-a;trt_cp;0.07 uM;24 h	4104	3	-8.2103	-2.38323	0.139737	0.324105	penitrem-a	trt_cp	0.07 uM	24 h	Epithelial Cell
Epithelial Cell;BRD-K93367411;trt_cp;1.25 uM;24 h	4104	3	27.5632	8.69946	0.012854	0.078566	BRD-K93367411	trt_cp	1.25 uM	24 h	Epithelial Cell
Epithelial Cell;paclitaxel;trt_cp;320 uM;24 h	4104	3	25.0556	11.3216	0.00756522	0.0553183	paclitaxel	trt_cp	320 uM	24 h	Epithelial Cell
Epithelial Cell;BRD-U37528018;trt_cp;0.3 uM;24 h	4104	3	21.9211	22.1634	0.00177635	0.0192477	BRD-U37528018	trt_cp	0.3 uM	24 h	Epithelial Cell
Epithelial Cell;REV-5901;trt_cp;0.3 uM;24 h	4104	3	-8.86631	-1.24884	0.338024	0.536485	REV-5901	trt_cp	0.3 uM	24 h	Epithelial Cell
Epithelial Cell;NSC-4644;trt_cp;0.02 uM;24 h	4104	3	2.72777	0.55083	0.637011	0.776243	NSC-4644	trt_cp	0.02 uM	24 h	Epithelial Cell
Neural Progenitor Cell;BRD-K73261812;trt_cp;1.67 uM;6 h	73	3	-11.1372	-5.62328	0.000148469	0.00276191	BRD-K73261812	trt_cp	1.67 uM	6 h	Neural Progenitor Cell
Neural Progenitor Cell;clozapine;trt_cp;1.67 uM;24 h	1286	15	11.8291	4.84603	0.000234663	0.00392863	clozapine	trt_cp	1.67 uM	24 h	Neural Progenitor Cell
Neural Progenitor Cell;AZD-8055;trt_cp;0.3 uM;24 h	1286	15	9.09717	3.66374	0.00242602	0.0244231	AZD-8055	trt_cp	0.3 uM	24 h	Neural Progenitor Cell
Neural Progenitor Cell;citalopram;trt_cp;12.5 uM;24 h	1286	15	12.3207	5.00452	0.000173791	0.00313012	citalopram	trt_cp	12.5 uM	24 h	Neural Progenitor Cell
Kidney Cell;swainsonine;trt_cp;0.05 uM;24 h	1114	3	3.47386	2.33491	0.141603	0.326566	swainsonine	trt_cp	0.05 uM	24 h	Kidney Cell
Neural Progenitor Cell;amitriptyline;trt_cp;25 uM;24 h	1286	14	13.6191	6.09109	3.19452e-05	0.000817904	amitriptyline	trt_cp	25 uM	24 h	Neural Progenitor Cell
Neural Progenitor Cell;tianeptine;trt_cp;8 uM;24 h	1286	15	11.7805	4.67947	0.000325201	0.00505204	tianeptine	trt_cp	8 uM	24 h	Neural Progenitor Cell
Neural Progenitor Cell;bizine;trt_cp;6.66 uM;24 h	1286	14	11.5706	5.00977	0.000211869	0.00364667	bizine	trt_cp	6.66 uM	24 h	Neural Progenitor Cell
Neural Progenitor Cell;tianeptine;trt_cp;30 uM;24 h	1286	12	15.1668	7.89222	5.1972e-06	0.000184641	tianeptine	trt_cp	30 uM	24 h	Neural Progenitor Cell
Epithelial Cell;VER-155008;trt_cp;0.05 uM;24 h	4104	3	-8.31956	-1.27825	0.329387	0.528707	VER-155008	trt_cp	0.05 uM	24 h	Epithelial Cell
Epithelial Cell;BRD-K50776152;trt_cp;40 uM;24 h	4104	3	-2.30032	-1.3457	0.309652	0.510094	BRD-K50776152	trt_cp	40 uM	24 h	Epithelial Cell
Epithelial Cell;nutlin-3;trt_cp;40 uM;6 h	585	5	-4.89	-3.56478	0.0164914	0.0922521	nutlin-3	trt_cp	40 uM	6 h	Epithelial Cell
Epithelial Cell;PP-30;trt_cp;12 uM;6 h	585	5	-0.384834	-0.203301	0.847855	0.914861	PP-30	trt_cp	12 uM	6 h	Epithelial Cell
Epithelial Cell;BML-259;trt_cp;80 uM;6 h	585	5	-1.50784	-0.942352	0.392275	0.584075	BML-259	trt_cp	80 uM	6 h	Epithelial Cell
Epithelial Cell;BRD-K28112517;trt_cp;12 uM;6 h	585	5	-1.3137	-0.745476	0.492811	0.666265	BRD-K28112517	trt_cp	12 uM	6 h	Epithelial Cell
Epithelial Cell;CHEMBL-1222381;trt_cp;80 uM;6 h	585	5	-5.12395	-3.19423	0.0267123	0.124317	CHEMBL-1222381	trt_cp	80 uM	6 h	Epithelial Cell
Epithelial Cell;selumetinib;trt_cp;80 uM;6 h	585	5	-1.80291	-1.58793	0.168067	0.35892	selumetinib	trt_cp	80 uM	6 h	Epithelial Cell
Epithelial Cell;fluorouracil;trt_cp;100 uM;24 h	4104	3	29.5381	18.6093	0.00274156	0.0267142	fluorouracil	trt_cp	100 uM	24 h	Epithelial Cell
Epithelial Cell;diatrizoic-acid;trt_cp;100000 uM;24 h	4104	3	26.4878	7.45257	0.0174323	0.0955225	diatrizoic-acid	trt_cp	100000 uM	24 h	Epithelial Cell
Epithelial Cell;BRD-U12060954;trt_cp;320 uM;24 h	4104	3	18.1185	23.595	0.00142437	0.0162242	BRD-U12060954	trt_cp	320 uM	24 h	Epithelial Cell
Epithelial Cell;BRD-A44174994;trt_cp;100 uM;24 h	4104	3	21.633	65.5272	3.12265e-05	0.000801265	BRD-A44174994	trt_cp	100 uM	24 h	Epithelial Cell
Epithelial Cell;dexamethasone;trt_cp;320 uM;6 h	585	3	21.0518	4.54765	0.0436416	0.167097	dexamethasone	trt_cp	320 uM	6 h	Epithelial Cell
Epithelial Cell;troglitazone;trt_cp;30 uM;6 h	585	3	15.3562	6.33146	0.0204442	0.105446	troglitazone	trt_cp	30 uM	6 h	Epithelial Cell
Epithelial Cell;lead-acetate;trt_cp;30 uM;6 h	585	3	20.4422	8.23201	0.0119862	0.075057	lead-acetate	trt_cp	30 uM	6 h	Epithelial Cell
Epithelial Cell;sorafenib;trt_cp;30 uM;6 h	585	3	25.7449	56.8427	6.54423e-125	7.61814e-121	sorafenib	trt_cp	30 uM	6 h	Epithelial Cell
Epithelial Cell;BRD-A91712064;trt_cp;100 uM;6 h	585	3	18.7077	3.5922	0.0680964	0.215835	BRD-A91712064	trt_cp	100 uM	6 h	Epithelial Cell
Epithelial Cell;AZD-7545;trt_cp;1.25 uM;24 h	4104	3	-5.72011	-1.2572	0.335465	0.534366	AZD-7545	trt_cp	1.25 uM	24 h	Epithelial Cell
Neural Progenitor Cell;CHIR-99021;trt_cp;1.25 uM;24 h	1286	15	12.5555	5.76665	4.09444e-05	0.000995248	CHIR-99021	trt_cp	1.25 uM	24 h	Neural Progenitor Cell
Neural Progenitor Cell;oxiracetam;trt_cp;125 uM;24 h	1286	13	14.697	10.0741	1.37321e-07	8.47293e-06	oxiracetam	trt_cp	125 uM	24 h	Neural Progenitor Cell
Neural Progenitor Cell;quetiapine;trt_cp;1.67 uM;24 h	1286	14	12.1568	4.70246	0.000380058	0.00569402	quetiapine	trt_cp	1.67 uM	24 h	Neural Progenitor Cell
Neural Progenitor Cell;ziprasidone;trt_cp;25 uM;24 h	1286	15	10.3919	4.59151	0.000378014	0.00567313	ziprasidone	trt_cp	25 uM	24 h	Neural Progenitor Cell
Neural Progenitor Cell;clonazepam;trt_cp;6.66 uM;24 h	1286	15	10.6718	4.47943	0.000475298	0.00678636	clonazepam	trt_cp	6.66 uM	24 h	Neural Progenitor Cell
Neural Progenitor Cell;varenicline;trt_cp;25 uM;24 h	1286	15	12.5798	4.80738	0.000255968	0.00419584	varenicline	trt_cp	25 uM	24 h	Neural Progenitor Cell
Neural Progenitor Cell;lorazepam;trt_cp;12.5 uM;24 h	1286	14	10.7798	4.97904	0.00022036	0.00374684	lorazepam	trt_cp	12.5 uM	24 h	Neural Progenitor Cell
Neural Progenitor Cell;BRD-A90543464;trt_cp;40 uM;24 h	1286	14	15.6445	5.86217	4.94408e-05	0.00115595	BRD-A90543464	trt_cp	40 uM	24 h	Neural Progenitor Cell
Neural Progenitor Cell;risperidone;trt_cp;25 uM;24 h	1286	12	13.4528	5.7107	0.000117578	0.00232249	risperidone	trt_cp	25 uM	24 h	Neural Progenitor Cell
Neural Progenitor Cell;clonazepam;trt_cp;1.67 uM;24 h	1286	13	12.9343	6.64555	1.80097e-05	0.000514272	clonazepam	trt_cp	1.67 uM	24 h	Neural Progenitor Cell
Neural Progenitor Cell;BRD-K89997465;trt_cp;1.67 uM;24 h	1286	13	14.5207	7.52085	5.01437e-06	0.000179792	BRD-K89997465	trt_cp	1.67 uM	24 h	Neural Progenitor Cell
Epithelial Cell;AG-14361;trt_cp;25 uM;6 h	585	5	-2.82411	-1.10101	0.329456	0.528774	AG-14361	trt_cp	25 uM	6 h	Epithelial Cell
Epithelial Cell;importazole;trt_cp;60 uM;6 h	585	5	-3.65407	-1.8765	0.126895	0.306258	importazole	trt_cp	60 uM	6 h	Epithelial Cell
Epithelial Cell;BMS-641988;trt_cp;12 uM;6 h	585	5	-1.27857	-0.8703	0.425526	0.612002	BMS-641988	trt_cp	12 uM	6 h	Epithelial Cell
Epithelial Cell;DL-TBOA;trt_cp;150 uM;6 h	585	5	-1.55865	-0.862216	0.432083	0.617491	DL-TBOA	trt_cp	150 uM	6 h	Epithelial Cell
Epithelial Cell;HDAC3-selective;trt_cp;0.3 uM;6 h	585	3	-11.24	-4.52497	0.0405264	0.160429	HDAC3-selective	trt_cp	0.3 uM	6 h	Epithelial Cell
Epithelial Cell;dcv-gsh;trt_cp;100 uM;6 h	585	3	21.7036	14.3419	0.00232126	0.023593	dcv-gsh	trt_cp	100 uM	6 h	Epithelial Cell
Epithelial Cell;aspirin;trt_cp;100 uM;6 h	585	3	19.5487	4.56346	0.0431128	0.165928	aspirin	trt_cp	100 uM	6 h	Epithelial Cell
Epithelial Cell;rifampicin;trt_cp;100 uM;6 h	585	3	27.0843	5.55583	0.029828	0.133293	rifampicin	trt_cp	100 uM	6 h	Epithelial Cell
Epithelial Cell;amphotericin;trt_cp;30 uM;24 h	4104	3	23.6387	14.0051	0.0048766	0.0407722	amphotericin	trt_cp	30 uM	24 h	Epithelial Cell
Epithelial Cell;phenacetin;trt_cp;320 uM;24 h	4104	3	21.1617	3.81111	0.0623836	0.204993	phenacetin	trt_cp	320 uM	24 h	Epithelial Cell
Epithelial Cell;dcv-gsh;trt_cp;320 uM;6 h	585	3	18.2864	13.5597	0.00214816	0.0222943	dcv-gsh	trt_cp	320 uM	6 h	Epithelial Cell
Epithelial Cell;penitrem-a;trt_cp;0.002 uM;24 h	4104	3	-8.05838	-1.12855	0.376206	0.569618	penitrem-a	trt_cp	0.002 uM	24 h	Epithelial Cell
Epithelial Cell;methotrexate;trt_cp;1000 uM;24 h	4104	3	32.9228	36.9096	0.000601073	0.00820934	methotrexate	trt_cp	1000 uM	24 h	Epithelial Cell
Epithelial Cell;carbamazepine;trt_cp;320 uM;6 h	585	3	21.3252	7.98516	0.0130971	0.0794634	carbamazepine	trt_cp	320 uM	6 h	Epithelial Cell
Epithelial Cell;allopurinol;trt_cp;1000 uM;24 h	4104	3	20.4637	7.98371	0.0151526	0.0873516	allopurinol	trt_cp	1000 uM	24 h	Epithelial Cell
Epithelial Cell;arsenic-trioxide;trt_cp;1000 uM;6 h	585	3	17.5068	8.45293	0.0103991	0.0684192	arsenic-trioxide	trt_cp	1000 uM	6 h	Epithelial Cell
Neural Progenitor Cell;ruboxistaurin;trt_cp;1.25 uM;24 h	1286	15	11.8894	4.52116	0.000445204	0.00643537	ruboxistaurin	trt_cp	1.25 uM	24 h	Neural Progenitor Cell
Neural Progenitor Cell;topotecan;trt_cp;25 uM;24 h	1286	7	24.7956	11.2158	2.22269e-05	0.00060454	topotecan	trt_cp	25 uM	24 h	Neural Progenitor Cell
Neural Progenitor Cell;topiramate;trt_cp;1.67 uM;24 h	1286	13	12.6689	4.86319	0.000356234	0.0054284	topiramate	trt_cp	1.67 uM	24 h	Neural Progenitor Cell
Neural Progenitor Cell;BRD-K01543453;trt_cp;50 uM;24 h	1286	15	12.71	4.71871	0.000304882	0.00480044	BRD-K01543453	trt_cp	50 uM	24 h	Neural Progenitor Cell
Neural Progenitor Cell;ketamine;trt_cp;12.5 uM;24 h	1286	15	11.7467	5.15213	0.00012914	0.00249169	ketamine	trt_cp	12.5 uM	24 h	Neural Progenitor Cell
Neural Progenitor Cell;bizine;trt_cp;12.5 uM;24 h	1286	14	12.7742	5.74007	5.77625e-05	0.00130882	bizine	trt_cp	12.5 uM	24 h	Neural Progenitor Cell
Neural Progenitor Cell;valproic-acid;trt_cp;5000 uM;24 h	1286	13	13.2486	9.90589	1.41027e-07	8.64048e-06	valproic-acid	trt_cp	5000 uM	24 h	Neural Progenitor Cell
Neural Progenitor Cell;pramipexole;trt_cp;6.66 uM;24 h	1286	13	14.5095	7.12788	9.06191e-06	0.00029357	pramipexole	trt_cp	6.66 uM	24 h	Neural Progenitor Cell
Neural Progenitor Cell;pramipexole;trt_cp;1.67 uM;24 h	1286	13	11.0604	4.38919	0.000816042	0.0104467	pramipexole	trt_cp	1.67 uM	24 h	Neural Progenitor Cell
Neural Progenitor Cell;I-BET-151;trt_cp;0.3 uM;24 h	1286	15	14.3124	6.30431	1.60706e-05	0.000467454	I-BET-151	trt_cp	0.3 uM	24 h	Neural Progenitor Cell
Neural Progenitor Cell;topiramate;trt_cp;25 uM;24 h	1286	15	11.9627	4.98217	0.000180354	0.00322009	topiramate	trt_cp	25 uM	24 h	Neural Progenitor Cell
Neural Progenitor Cell;sirolimus;trt_cp;0.3 uM;24 h	1286	13	12.4744	4.92814	0.000316761	0.00494733	sirolimus	trt_cp	0.3 uM	24 h	Neural Progenitor Cell
Epithelial Cell;curcumin;trt_cp;50 uM;6 h	585	4	-1.48761	-1.16195	0.312573	0.512825	curcumin	trt_cp	50 uM	6 h	Epithelial Cell
Epithelial Cell;olaparib;trt_cp;40 uM;6 h	585	5	-1.60317	-0.873647	0.426593	0.613033	olaparib	trt_cp	40 uM	6 h	Epithelial Cell
Epithelial Cell;RS-23597-190;trt_cp;150 uM;6 h	585	5	-4.11377	-4.60773	0.00261371	0.0257625	RS-23597-190	trt_cp	150 uM	6 h	Epithelial Cell
Epithelial Cell;PK-11195;trt_cp;150 uM;6 h	585	5	-4.8023	-2.33864	0.0738158	0.22603	PK-11195	trt_cp	150 uM	6 h	Epithelial Cell
Epithelial Cell;dfcl-cys;trt_cp;30 uM;6 h	585	3	19.1342	4.00724	0.0554577	0.191126	dfcl-cys	trt_cp	30 uM	6 h	Epithelial Cell
Epithelial Cell;amanitin;trt_cp;30 uM;6 h	585	3	33.5744	12.5908	0.00508625	0.0419575	amanitin	trt_cp	30 uM	6 h	Epithelial Cell
Epithelial Cell;furosemide;trt_cp;320 uM;6 h	585	3	22.8261	6.31967	0.0224632	0.111804	furosemide	trt_cp	320 uM	6 h	Epithelial Cell
Epithelial Cell;BRD-A38479395;trt_cp;320 uM;24 h	4104	3	28.6932	9.64609	0.0104753	0.0687778	BRD-A38479395	trt_cp	320 uM	24 h	Epithelial Cell
Epithelial Cell;amanitin;trt_cp;100 uM;6 h	585	3	32.6432	18.3666	0.00165357	0.0182977	amanitin	trt_cp	100 uM	6 h	Epithelial Cell
Epithelial Cell;tcv-cys;trt_cp;320 uM;6 h	585	3	18.6816	10.7642	0.00534792	0.0434743	tcv-cys	trt_cp	320 uM	6 h	Epithelial Cell
Neural Progenitor Cell;BRD-A36536537;trt_cp;6.66 uM;6 h	73	3	-7.2727	-3.84288	0.00170498	0.018725	BRD-A36536537	trt_cp	6.66 uM	6 h	Neural Progenitor Cell
Epithelial Cell;BRD-A91712064;trt_cp;0.3 uM;6 h	585	3	13.4137	3.59861	0.066542	0.212782	BRD-A91712064	trt_cp	0.3 uM	6 h	Epithelial Cell
Epithelial Cell;mannitol;trt_cp;320 uM;6 h	585	3	18.8509	9.22296	0.00855732	0.0601665	mannitol	trt_cp	320 uM	6 h	Epithelial Cell
Neural Progenitor Cell;lamotrigine;trt_cp;1.67 uM;24 h	1286	14	11.67	5.06195	0.0001927	0.00338698	lamotrigine	trt_cp	1.67 uM	24 h	Neural Progenitor Cell
Neural Progenitor Cell;vorinostat;trt_cp;1.25 uM;24 h	1286	15	14.212	9.78896	4.91863e-08	3.42178e-06	vorinostat	trt_cp	1.25 uM	24 h	Neural Progenitor Cell
Neural Progenitor Cell;sirolimus;trt_cp;1.25 uM;24 h	1286	13	12.1129	4.90116	0.000330276	0.00512177	sirolimus	trt_cp	1.25 uM	24 h	Neural Progenitor Cell
Neural Progenitor Cell;haloperidol;trt_cp;1.67 uM;24 h	1286	14	11.4266	4.71735	0.000365425	0.00552457	haloperidol	trt_cp	1.67 uM	24 h	Neural Progenitor Cell
Neural Progenitor Cell;tianeptine;trt_cp;250 uM;24 h	1286	12	18.3464	9.86453	5.12757e-07	2.65491e-05	tianeptine	trt_cp	250 uM	24 h	Neural Progenitor Cell
Neural Progenitor Cell;roflumilast;trt_cp;0.3 uM;24 h	1286	14	12.8655	6.12593	2.94018e-05	0.000761057	roflumilast	trt_cp	0.3 uM	24 h	Neural Progenitor Cell
Neural Progenitor Cell;topotecan;trt_cp;12.5 uM;24 h	1286	8	24.9291	9.99134	1.71075e-05	0.000491959	topotecan	trt_cp	12.5 uM	24 h	Neural Progenitor Cell
Neural Progenitor Cell;troglitazone;trt_cp;12.5 uM;24 h	1286	15	10.975	4.69412	0.000311718	0.00488386	troglitazone	trt_cp	12.5 uM	24 h	Neural Progenitor Cell
Neural Progenitor Cell;amitriptyline;trt_cp;12.5 uM;24 h	1286	14	12.4525	5.41638	0.000102392	0.00207656	amitriptyline	trt_cp	12.5 uM	24 h	Neural Progenitor Cell
Epithelial Cell;fluoropyruvate;trt_cp;40 uM;6 h	585	5	-3.18626	-1.82972	0.132632	0.314273	fluoropyruvate	trt_cp	40 uM	6 h	Epithelial Cell
Epithelial Cell;BRD-K19216856;trt_cp;90 uM;24 h	4104	3	4.12504	0.943493	0.444904	0.628535	BRD-K19216856	trt_cp	90 uM	24 h	Epithelial Cell
Epithelial Cell;BRD-K93725829;trt_cp;0.5 uM;6 h	585	5	-2.10991	-0.997678	0.370557	0.565305	BRD-K93725829	trt_cp	0.5 uM	6 h	Epithelial Cell
Epithelial Cell;BRD-K35716340;trt_cp;12 uM;24 h	4104	5	-3.26984	-3.40374	0.0259981	0.122263	BRD-K35716340	trt_cp	12 uM	24 h	Epithelial Cell
Epithelial Cell;gossypol;trt_cp;12 uM;6 h	585	5	-5.84681	-5.14045	0.0028044	0.0270996	gossypol	trt_cp	12 uM	6 h	Epithelial Cell
Epithelial Cell;BRD-K76188144;trt_cp;150 uM;6 h	585	5	1.37048	0.523162	0.627088	0.768803	BRD-K76188144	trt_cp	150 uM	6 h	Epithelial Cell
Epithelial Cell;fluorouracil;trt_cp;320 uM;6 h	585	3	20.0999	7.31906	0.0157925	0.0899581	fluorouracil	trt_cp	320 uM	6 h	Epithelial Cell
Epithelial Cell;colchicine;trt_cp;320 uM;6 h	585	3	28.7843	6.65363	0.0207479	0.106352	colchicine	trt_cp	320 uM	6 h	Epithelial Cell
Epithelial Cell;BRD-U37528018;trt_cp;100 uM;24 h	4104	3	24.4559	50.9538	0.000172217	0.00310946	BRD-U37528018	trt_cp	100 uM	24 h	Epithelial Cell
Epithelial Cell;BRD-A44174994;trt_cp;320 uM;6 h	585	3	21.9289	4.01059	0.0557358	0.191562	BRD-A44174994	trt_cp	320 uM	6 h	Epithelial Cell
Epithelial Cell;sirolimus;trt_cp;30 uM;6 h	585	3	18.2323	4.99867	0.0356333	0.148534	sirolimus	trt_cp	30 uM	6 h	Epithelial Cell
Epithelial Cell;amphotericin;trt_cp;100 uM;24 h	4104	3	21.297	9.09527	0.011696	0.0738889	amphotericin	trt_cp	100 uM	24 h	Epithelial Cell
Epithelial Cell;sirolimus;trt_cp;0.3 uM;6 h	585	3	20.8807	9.21832	0.0090788	0.0623984	sirolimus	trt_cp	0.3 uM	6 h	Epithelial Cell
Epithelial Cell;pentamidine;trt_cp;1000 uM;6 h	585	3	22.8696	7.6722	0.0146649	0.0856424	pentamidine	trt_cp	1000 uM	6 h	Epithelial Cell
Epithelial Cell;colchicine;trt_cp;100 uM;24 h	4104	3	23.6215	9.96517	0.00976758	0.0655357	colchicine	trt_cp	100 uM	24 h	Epithelial Cell
Epithelial Cell;furosemide;trt_cp;30 uM;24 h	4104	3	24.2746	5.49977	0.0314132	0.137526	furosemide	trt_cp	30 uM	24 h	Epithelial Cell
Epithelial Cell;mitomycin;trt_cp;100 uM;6 h	585	3	23.4435	25.8914	5.45277e-05	0.00125199	mitomycin	trt_cp	100 uM	6 h	Epithelial Cell
Epithelial Cell;amanitin;trt_cp;1000 uM;24 h	4104	3	27.869	26.1037	0.00129654	0.0151183	amanitin	trt_cp	1000 uM	24 h	Epithelial Cell
Epithelial Cell;BRD-K98404142;trt_cp;1.25 uM;24 h	4104	3	4.85614	3.66583	0.0655169	0.210802	BRD-K98404142	trt_cp	1.25 uM	24 h	Epithelial Cell
Epithelial Cell;rifampicin;trt_cp;320 uM;24 h	4104	3	27.0554	16.2875	0.00359815	0.032495	rifampicin	trt_cp	320 uM	24 h	Epithelial Cell
Neural Progenitor Cell;methylphenidate;trt_cp;6.66 uM;24 h	1286	14	13.1674	6.01867	3.57693e-05	0.000894066	methylphenidate	trt_cp	6.66 uM	24 h	Neural Progenitor Cell
Neural Progenitor Cell;topotecan;trt_cp;6.66 uM;24 h	1286	11	21.2735	6.61685	5.40371e-05	0.00124566	topotecan	trt_cp	6.66 uM	24 h	Neural Progenitor Cell
Neural Progenitor Cell;flunarizine;trt_cp;25 uM;24 h	1286	10	17.0294	9.06084	5.3441e-06	0.000189282	flunarizine	trt_cp	25 uM	24 h	Neural Progenitor Cell
Neural Progenitor Cell;lithium-chloride;trt_cp;5000 uM;24 h	1286	13	16.5144	7.95556	2.90233e-06	0.000115311	lithium-chloride	trt_cp	5000 uM	24 h	Neural Progenitor Cell
Neural Progenitor Cell;duloxetine;trt_cp;6.66 uM;24 h	1286	13	14.5441	7.49098	5.24877e-06	0.000186283	duloxetine	trt_cp	6.66 uM	24 h	Neural Progenitor Cell
Neural Progenitor Cell;quetiapine;trt_cp;25 uM;24 h	1286	15	11.5312	4.88582	0.000215925	0.00369464	quetiapine	trt_cp	25 uM	24 h	Neural Progenitor Cell
Neural Progenitor Cell;ketamine;trt_cp;1.67 uM;24 h	1286	13	12.7959	5.02476	0.000268706	0.00435189	ketamine	trt_cp	1.67 uM	24 h	Neural Progenitor Cell
Epithelial Cell;KO-143;trt_cp;40 uM;6 h	585	5	-5.03815	-1.32066	0.255429	0.457172	KO-143	trt_cp	40 uM	6 h	Epithelial Cell
Epithelial Cell;BRD-K89329876;trt_cp;40 uM;6 h	585	5	-2.31532	-1.27634	0.263751	0.465977	BRD-K89329876	trt_cp	40 uM	6 h	Epithelial Cell
Epithelial Cell;promethazine;trt_cp;6.66 uM;6 h	585	5	-5.24021	-3.75072	0.0138044	0.0824449	promethazine	trt_cp	6.66 uM	6 h	Epithelial Cell
Epithelial Cell;alda-1;trt_cp;40 uM;6 h	585	5	-1.82108	-1.17262	0.296892	0.497977	alda-1	trt_cp	40 uM	6 h	Epithelial Cell
Epithelial Cell;PI-103;trt_cp;12 uM;6 h	585	5	0.600984	0.162417	0.878648	0.932817	PI-103	trt_cp	12 uM	6 h	Epithelial Cell
Epithelial Cell;ciprofloxacin;trt_cp;320 uM;24 h	4104	3	20.6451	12.3036	0.00631677	0.0489788	ciprofloxacin	trt_cp	320 uM	24 h	Epithelial Cell
Epithelial Cell;furosemide;trt_cp;1000 uM;6 h	585	3	20.663	8.06977	0.0126337	0.0777049	furosemide	trt_cp	1000 uM	6 h	Epithelial Cell
Epithelial Cell;BRD-A91712064;trt_cp;30 uM;6 h	585	3	21.1849	12.8174	0.00341258	0.0313048	BRD-A91712064	trt_cp	30 uM	6 h	Epithelial Cell
Epithelial Cell;pioglitazone;trt_cp;100 uM;24 h	4104	3	17.0618	20.912	0.00187945	0.0201105	pioglitazone	trt_cp	100 uM	24 h	Epithelial Cell
Epithelial Cell;BRD-A44174994;trt_cp;100 uM;6 h	585	3	21.9942	4.687	0.0412461	0.1618	BRD-A44174994	trt_cp	100 uM	6 h	Epithelial Cell
Epithelial Cell;lead-acetate;trt_cp;30 uM;24 h	4104	3	21.108	8.10472	0.0147172	0.0857713	lead-acetate	trt_cp	30 uM	24 h	Epithelial Cell
Epithelial Cell;paracetamol;trt_cp;320 uM;24 h	4104	3	19.9221	9.46052	0.0107813	0.070154	paracetamol	trt_cp	320 uM	24 h	Epithelial Cell
Epithelial Cell;BRD-A79545933;trt_cp;3200 uM;6 h	585	3	23.0021	13.9939	0.00277246	0.0268911	BRD-A79545933	trt_cp	3200 uM	6 h	Epithelial Cell
Epithelial Cell;methotrexate;trt_cp;30 uM;6 h	585	3	19.2001	4.75941	0.0395825	0.158	methotrexate	trt_cp	30 uM	6 h	Epithelial Cell
Epithelial Cell;diatrizoic-acid;trt_cp;10000 uM;6 h	585	3	18.1278	9.83454	0.00690503	0.0519932	diatrizoic-acid	trt_cp	10000 uM	6 h	Epithelial Cell
Epithelial Cell;BRD-A79545933;trt_cp;320 uM;24 h	4104	3	26.2977	12.1021	0.00662084	0.0506882	BRD-A79545933	trt_cp	320 uM	24 h	Epithelial Cell
Epithelial Cell;BRD-K61498099;trt_cp;0.02 uM;24 h	4104	3	-14.6651	-2.84809	0.104223	0.274721	BRD-K61498099	trt_cp	0.02 uM	24 h	Epithelial Cell
Neural Progenitor Cell;ruxolitinib;trt_cp;0.5 uM;6 h	73	3	-7.67625	-4.61505	3.62018e-05	0.000903583	ruxolitinib	trt_cp	0.5 uM	6 h	Neural Progenitor Cell
Neural Progenitor Cell;topiramate;trt_cp;6.66 uM;24 h	1286	13	14.3923	6.81452	1.46067e-05	0.000433031	topiramate	trt_cp	6.66 uM	24 h	Neural Progenitor Cell
Neural Progenitor Cell;haloperidol;trt_cp;12.5 uM;24 h	1286	14	15.602	6.06165	3.50947e-05	0.000881101	haloperidol	trt_cp	12.5 uM	24 h	Neural Progenitor Cell
Neural Progenitor Cell;zopiclone;trt_cp;25 uM;24 h	1286	15	12.3628	4.57415	0.000403264	0.00596492	zopiclone	trt_cp	25 uM	24 h	Neural Progenitor Cell
Epithelial Cell;VER-155008;trt_cp;1.25 uM;24 h	4104	3	3.73008	0.700583	0.556038	0.715389	VER-155008	trt_cp	1.25 uM	24 h	Epithelial Cell
Neural Progenitor Cell;simvastatin;trt_cp;1.67 uM;24 h	1286	13	13.9559	5.44192	0.000133563	0.00255445	simvastatin	trt_cp	1.67 uM	24 h	Neural Progenitor Cell
Neural Progenitor Cell;zopiclone;trt_cp;12.5 uM;24 h	1286	15	12.7102	5.31869	9.57038e-05	0.00196757	zopiclone	trt_cp	12.5 uM	24 h	Neural Progenitor Cell
Epithelial Cell;BMS-536924;trt_cp;12 uM;6 h	585	5	-3.21584	-1.02309	0.362073	0.558091	BMS-536924	trt_cp	12 uM	6 h	Epithelial Cell
Epithelial Cell;BRD-K07303502;trt_cp;80 uM;6 h	585	5	-12.0675	-5.87917	0.0031288	0.0294758	BRD-K07303502	trt_cp	80 uM	6 h	Epithelial Cell
Epithelial Cell;BRD-K80672993;trt_cp;90 uM;6 h	585	5	-6.62589	-4.50781	0.0070178	0.0525748	BRD-K80672993	trt_cp	90 uM	6 h	Epithelial Cell
Epithelial Cell;SRT-1720;trt_cp;12 uM;6 h	585	5	-4.14797	-2.55451	0.0547117	0.189647	SRT-1720	trt_cp	12 uM	6 h	Epithelial Cell
Epithelial Cell;orteronel;trt_cp;40 uM;6 h	585	5	2.41921	0.904384	0.414456	0.603412	orteronel	trt_cp	40 uM	6 h	Epithelial Cell
Epithelial Cell;phenacetin;trt_cp;100 uM;24 h	4104	3	25.2532	29.7802	0.000917582	0.0114691	phenacetin	trt_cp	100 uM	24 h	Epithelial Cell
Epithelial Cell;4-AMINOPHENOL;trt_cp;100 uM;6 h	585	3	21.3466	12.4226	0.00383455	0.0341008	4-AMINOPHENOL	trt_cp	100 uM	6 h	Epithelial Cell
Epithelial Cell;cyclopentene;trt_cp;0.3 uM;6 h	585	4	-12.0102	-5.18983	0.0116134	0.0735747	cyclopentene	trt_cp	0.3 uM	6 h	Epithelial Cell
Epithelial Cell;paraquat;trt_cp;100 uM;24 h	4104	3	20.2513	10.0222	0.00960116	0.0647925	paraquat	trt_cp	100 uM	24 h	Epithelial Cell
Epithelial Cell;arsenic-trioxide;trt_cp;30 uM;24 h	4104	3	20.4763	11.5369	0.00720893	0.0535287	arsenic-trioxide	trt_cp	30 uM	24 h	Epithelial Cell
Epithelial Cell;penitrem-a;trt_cp;0.006 uM;24 h	4104	3	3.74655	3.18064	0.0841616	0.24339	penitrem-a	trt_cp	0.006 uM	24 h	Epithelial Cell
Epithelial Cell;aspirin;trt_cp;30 uM;6 h	585	3	19.8712	10.4464	0.00620444	0.0483331	aspirin	trt_cp	30 uM	6 h	Epithelial Cell
Epithelial Cell;paracetamol;trt_cp;30 uM;6 h	585	3	22.1297	9.22366	0.00931845	0.0635352	paracetamol	trt_cp	30 uM	6 h	Epithelial Cell
Epithelial Cell;paclitaxel;trt_cp;30 uM;6 h	585	3	20.224	7.98411	0.0128659	0.0785932	paclitaxel	trt_cp	30 uM	6 h	Epithelial Cell
Epithelial Cell;620_7033_4267;trt_cp;12.5 uM;24 h	4104	3	1.03754	1.24275	0.335896	0.534687	620_7033_4267	trt_cp	12.5 uM	24 h	Epithelial Cell
Neural Progenitor Cell;lorazepam;trt_cp;25 uM;24 h	1286	12	13.5558	6.31673	4.63582e-05	0.00109761	lorazepam	trt_cp	25 uM	24 h	Neural Progenitor Cell
Neural Progenitor Cell;fluvastatin;trt_cp;12.5 uM;24 h	1286	14	14.3809	6.43799	1.80566e-05	0.000515188	fluvastatin	trt_cp	12.5 uM	24 h	Neural Progenitor Cell
Neural Progenitor Cell;tianeptine;trt_cp;125 uM;24 h	1286	14	13.0572	5.26111	0.000137335	0.00260094	tianeptine	trt_cp	125 uM	24 h	Neural Progenitor Cell
Epithelial Cell;fumonisin-b1;trt_cp;150 uM;6 h	585	5	1.60072	1.17579	0.293093	0.494702	fumonisin-b1	trt_cp	150 uM	6 h	Epithelial Cell
Epithelial Cell;BRD-K21614065;trt_cp;15 uM;6 h	585	5	-1.15019	-0.678973	0.529936	0.695719	BRD-K21614065	trt_cp	15 uM	6 h	Epithelial Cell
Epithelial Cell;10-DEBC;trt_cp;25 uM;6 h	585	4	-2.21926	-1.58224	0.195147	0.390251	10-DEBC	trt_cp	25 uM	6 h	Epithelial Cell
Epithelial Cell;BRD-K31342827;trt_cp;12 uM;6 h	585	5	-2.01093	-1.52821	0.186641	0.380794	BRD-K31342827	trt_cp	12 uM	6 h	Epithelial Cell
Epithelial Cell;pioglitazone;trt_cp;100 uM;6 h	585	3	26.8757	32.895	6.98873e-06	0.00023742	pioglitazone	trt_cp	100 uM	6 h	Epithelial Cell
Epithelial Cell;methylparaben;trt_cp;30 uM;6 h	585	3	23.0286	12.0416	0.0045628	0.0388218	methylparaben	trt_cp	30 uM	6 h	Epithelial Cell
Epithelial Cell;allopurinol;trt_cp;320 uM;6 h	585	3	16.9388	4.87559	0.0371755	0.152166	allopurinol	trt_cp	320 uM	6 h	Epithelial Cell
Epithelial Cell;aspirin;trt_cp;30 uM;24 h	4104	3	25.0467	8.08987	0.0148193	0.0860835	aspirin	trt_cp	30 uM	24 h	Epithelial Cell
Epithelial Cell;pentamidine;trt_cp;320 uM;24 h	4104	3	18.9557	8.51431	0.0133008	0.0803778	pentamidine	trt_cp	320 uM	24 h	Epithelial Cell
Epithelial Cell;paracetamol;trt_cp;30 uM;24 h	4104	3	25.0767	23.1413	0.00166374	0.0183869	paracetamol	trt_cp	30 uM	24 h	Epithelial Cell
Epithelial Cell;paracetamol;trt_cp;320 uM;6 h	585	3	23.516	9.79516	0.00821593	0.05858	paracetamol	trt_cp	320 uM	6 h	Epithelial Cell
Epithelial Cell;methylparaben;trt_cp;320 uM;6 h	585	3	19.3508	5.62497	0.0280745	0.128429	methylparaben	trt_cp	320 uM	6 h	Epithelial Cell
Epithelial Cell;troglitazone;trt_cp;0.3 uM;24 h	4104	3	25.1453	26.6047	0.00120492	0.0142353	troglitazone	trt_cp	0.3 uM	24 h	Epithelial Cell
Epithelial Cell;furosemide;trt_cp;320 uM;24 h	4104	3	25.129	10.1498	0.00943135	0.0640177	furosemide	trt_cp	320 uM	24 h	Epithelial Cell
Epithelial Cell;ciprofloxacin;trt_cp;100 uM;24 h	4104	3	24.7738	24.5131	0.00145364	0.0164877	ciprofloxacin	trt_cp	100 uM	24 h	Epithelial Cell
Epithelial Cell;SRT-1720;trt_cp;12 uM;24 h	4104	5	-6.50592	-3.48177	0.0250061	0.119367	SRT-1720	trt_cp	12 uM	24 h	Epithelial Cell
Neural Progenitor Cell;pyrazolanthrone;trt_cp;25 uM;6 h	73	3	-7.45636	-4.15202	0.000455478	0.00656486	pyrazolanthrone	trt_cp	25 uM	6 h	Neural Progenitor Cell
Epithelial Cell;cadmium;trt_cp;100 uM;6 h	585	3	20.0277	7.92191	0.0130668	0.0793484	cadmium	trt_cp	100 uM	6 h	Epithelial Cell
Epithelial Cell;amphotericin;trt_cp;320 uM;24 h	4104	3	20.4239	27.856	0.000983008	0.0121092	amphotericin	trt_cp	320 uM	24 h	Epithelial Cell
Neural Progenitor Cell;lithium-chloride;trt_cp;2500 uM;24 h	1286	15	12.8056	4.63892	0.000356849	0.00542929	lithium-chloride	trt_cp	2500 uM	24 h	Neural Progenitor Cell
Neural Progenitor Cell;verapamil;trt_cp;6.66 uM;24 h	1286	15	11.9651	4.89311	0.000214529	0.00368057	verapamil	trt_cp	6.66 uM	24 h	Neural Progenitor Cell
Neural Progenitor Cell;BRD-A26030894;trt_cp;30 uM;24 h	1286	15	12.0494	5.17114	0.000125294	0.00244176	BRD-A26030894	trt_cp	30 uM	24 h	Neural Progenitor Cell
Epithelial Cell;lenalidomide;trt_cp;200 uM;24 h	4104	3	-2.79104	-0.826806	0.495115	0.66817	lenalidomide	trt_cp	200 uM	24 h	Epithelial Cell
Epithelial Cell;inhibitor-BEC;trt_cp;80 uM;6 h	585	5	-5.1175	-2.29002	0.0789705	0.234738	inhibitor-BEC	trt_cp	80 uM	6 h	Epithelial Cell
Epithelial Cell;batimastat;trt_cp;40 uM;6 h	585	5	-2.79781	-1.61155	0.173724	0.366027	batimastat	trt_cp	40 uM	6 h	Epithelial Cell
Epithelial Cell;carbamazepine;trt_cp;100 uM;24 h	4104	5	12.5748	1.61267	0.18208	0.375593	carbamazepine	trt_cp	100 uM	24 h	Epithelial Cell
Epithelial Cell;losartan;trt_cp;150 uM;6 h	585	5	-6.63191	-3.79376	0.0152055	0.0875911	losartan	trt_cp	150 uM	6 h	Epithelial Cell
Epithelial Cell;BRD-K92980438;trt_cp;150 uM;6 h	585	5	-3.7483	-2.22218	0.0817895	0.239262	BRD-K92980438	trt_cp	150 uM	6 h	Epithelial Cell
Epithelial Cell;cerulenin;trt_cp;40 uM;6 h	585	5	-6.01436	-2.22911	0.0862709	0.246812	cerulenin	trt_cp	40 uM	6 h	Epithelial Cell
Epithelial Cell;omeprazole;trt_cp;320 uM;6 h	585	3	22.2588	13.1438	0.00331917	0.0306493	omeprazole	trt_cp	320 uM	6 h	Epithelial Cell
Epithelial Cell;methotrexate;trt_cp;30 uM;24 h	4104	3	36.4613	24.0753	0.00162354	0.0180282	methotrexate	trt_cp	30 uM	24 h	Epithelial Cell
Epithelial Cell;amphotericin;trt_cp;30 uM;6 h	585	3	21.5532	6.03171	0.0245975	0.118127	amphotericin	trt_cp	30 uM	6 h	Epithelial Cell
Epithelial Cell;dcv-gsh;trt_cp;30 uM;24 h	4104	3	20.2216	11.7965	0.00688077	0.0519072	dcv-gsh	trt_cp	30 uM	24 h	Epithelial Cell
Epithelial Cell;lapatinib;trt_cp;100 uM;6 h	585	3	23.7057	8.82319	0.0106821	0.0697293	lapatinib	trt_cp	100 uM	6 h	Epithelial Cell
Epithelial Cell;carbamazepine;trt_cp;1000 uM;6 h	585	3	24.7965	13.3578	0.00353228	0.0321161	carbamazepine	trt_cp	1000 uM	6 h	Epithelial Cell
Neural Progenitor Cell;olaparib;trt_cp;1.67 uM;6 h	73	3	-1.62166	-0.695041	0.51335	0.682545	olaparib	trt_cp	1.67 uM	6 h	Neural Progenitor Cell
Epithelial Cell;BRD-K98948170;trt_cp;30 uM;24 h	4104	3	23.8376	10.6878	0.00848472	0.0599355	BRD-K98948170	trt_cp	30 uM	24 h	Epithelial Cell
Epithelial Cell;BRD-U37528018;trt_cp;100 uM;6 h	585	3	23.4486	6.07541	0.0245	0.117853	BRD-U37528018	trt_cp	100 uM	6 h	Epithelial Cell
Epithelial Cell;aspirin;trt_cp;320 uM;6 h	585	3	13.2413	5.43979	0.0278895	0.127903	aspirin	trt_cp	320 uM	6 h	Epithelial Cell
Neural Progenitor Cell;simvastatin;trt_cp;6.66 uM;24 h	1286	14	13.3011	4.55189	0.000510886	0.00719602	simvastatin	trt_cp	6.66 uM	24 h	Neural Progenitor Cell
Neural Progenitor Cell;haloperidol;trt_cp;6.66 uM;24 h	1286	13	14.1629	6.78531	1.51632e-05	0.000445745	haloperidol	trt_cp	6.66 uM	24 h	Neural Progenitor Cell
Neural Progenitor Cell;BRD-A26030894;trt_cp;15 uM;24 h	1286	15	12.0619	4.82009	0.000247816	0.00408576	BRD-A26030894	trt_cp	15 uM	24 h	Neural Progenitor Cell
Neural Progenitor Cell;ziprasidone;trt_cp;12.5 uM;24 h	1286	14	15.4062	5.69073	6.63345e-05	0.00147027	ziprasidone	trt_cp	12.5 uM	24 h	Neural Progenitor Cell
Neural Progenitor Cell;LY-2365109;trt_cp;6.66 uM;24 h	1286	13	14.2644	5.77063	7.74859e-05	0.00166525	LY-2365109	trt_cp	6.66 uM	24 h	Neural Progenitor Cell
Neural Progenitor Cell;tianeptine;trt_cp;15 uM;24 h	1286	13	12.9129	5.8545	6.5358e-05	0.00145197	tianeptine	trt_cp	15 uM	24 h	Neural Progenitor Cell
Epithelial Cell;SJ-172550;trt_cp;12 uM;6 h	585	5	-1.17854	-0.542392	0.61422	0.759065	SJ-172550	trt_cp	12 uM	6 h	Epithelial Cell
Epithelial Cell;SKI-II;trt_cp;40 uM;6 h	585	5	-2.87552	-1.16914	0.303572	0.504265	SKI-II	trt_cp	40 uM	6 h	Epithelial Cell
Epithelial Cell;VER-155008;trt_cp;12 uM;24 h	4104	6	8.1569	3.24893	0.0225867	0.112124	VER-155008	trt_cp	12 uM	24 h	Epithelial Cell
Epithelial Cell;BRD-K61894884;trt_cp;1.25 uM;6 h	585	4	-12.1076	-3.15974	0.0491185	0.178397	BRD-K61894884	trt_cp	1.25 uM	6 h	Epithelial Cell
Epithelial Cell;methylparaben;trt_cp;100 uM;24 h	4104	3	19.7898	13.9702	0.00482528	0.0404497	methylparaben	trt_cp	100 uM	24 h	Epithelial Cell
Epithelial Cell;diatrizoic-acid;trt_cp;1000 uM;24 h	4104	3	22.0605	6.62173	0.0219226	0.110168	diatrizoic-acid	trt_cp	1000 uM	24 h	Epithelial Cell
Epithelial Cell;citrinin;trt_cp;1000 uM;6 h	585	3	15.8686	4.53598	0.0427686	0.165198	citrinin	trt_cp	1000 uM	6 h	Epithelial Cell
Epithelial Cell;sunitinib;trt_cp;0.3 uM;6 h	585	3	17.6315	4.84808	0.0377941	0.15351	sunitinib	trt_cp	0.3 uM	6 h	Epithelial Cell
Epithelial Cell;dexamethasone;trt_cp;30 uM;6 h	585	3	18.5302	10.8379	0.00518681	0.0425808	dexamethasone	trt_cp	30 uM	6 h	Epithelial Cell
Epithelial Cell;BRD-K13959223;trt_cp;30 uM;24 h	4104	3	24.4902	15.9306	0.0037362	0.0334391	BRD-K13959223	trt_cp	30 uM	24 h	Epithelial Cell
Epithelial Cell;diatrizoic-acid;trt_cp;100000 uM;6 h	585	3	23.8195	6.88934	0.0187868	0.100197	diatrizoic-acid	trt_cp	100000 uM	6 h	Epithelial Cell
Epithelial Cell;BRD-U12060954;trt_cp;100 uM;6 h	585	3	21.6556	13.6526	0.00279574	0.0270608	BRD-U12060954	trt_cp	100 uM	6 h	Epithelial Cell
Epithelial Cell;diatrizoic-acid;trt_cp;32000 uM;6 h	585	3	19.5229	3.46602	0.0728639	0.224414	diatrizoic-acid	trt_cp	32000 uM	6 h	Epithelial Cell
Epithelial Cell;BMS-536924;trt_cp;0.05 uM;24 h	4104	3	4.97984	2.70803	0.112662	0.286687	BMS-536924	trt_cp	0.05 uM	24 h	Epithelial Cell
Neural Progenitor Cell;isradipine;trt_cp;25 uM;24 h	1286	15	12.7424	5.22557	0.000114395	0.00227119	isradipine	trt_cp	25 uM	24 h	Neural Progenitor Cell
Neural Progenitor Cell;tretinoin;trt_cp;6.66 uM;24 h	1286	15	10.5994	5.28881	9.59801e-05	0.00197171	tretinoin	trt_cp	6.66 uM	24 h	Neural Progenitor Cell
Neural Progenitor Cell;modafinil;trt_cp;12.5 uM;24 h	1286	14	13.8865	6.41316	1.85559e-05	0.000525996	modafinil	trt_cp	12.5 uM	24 h	Neural Progenitor Cell
Endothelial Cell;decitabine;trt_cp;0.12 uM;24 h	569	3	-2.94235	-1.29787	0.322185	0.521973	decitabine	trt_cp	0.12 uM	24 h	Endothelial Cell
Endothelial Cell;PD-0325901;trt_cp;0.12 uM;24 h	569	9	1.8671	1.43771	0.186779	0.380845	PD-0325901	trt_cp	0.12 uM	24 h	Endothelial Cell
Endothelial Cell;UNC-1215;trt_cp;0.12 uM;24 h	569	5	-2.49752	-2.34716	0.0743628	0.22686	UNC-1215	trt_cp	0.12 uM	24 h	Endothelial Cell
Embryonic Stem Cell;dasatinib;trt_cp;0.12 uM;24 h	107	6	2.96264	0.642403	0.546896	0.708731	dasatinib	trt_cp	0.12 uM	24 h	Embryonic Stem Cell
Neural Progenitor Cell;nacl;trt_cp;0.12 uM;24 h	1286	77	8.90367	4.45353	2.70652e-05	0.000710675	nacl	trt_cp	0.12 uM	24 h	Neural Progenitor Cell
Neural Progenitor Cell;nacl;trt_cp;0.12 uM;6 h	73	63	-5.34171	-2.56785	0.0113298	0.0723878	nacl	trt_cp	0.12 uM	6 h	Neural Progenitor Cell
Fibroblast;geldanamycin;trt_cp;0.12 uM;24 h	329	8	5.54004	2.61174	0.0310939	0.136708	geldanamycin	trt_cp	0.12 uM	24 h	Fibroblast
Epithelial Cell;PD-184352;trt_cp;0.12 uM;24 h	4104	3	2.41877	1.55103	0.259757	0.462162	PD-184352	trt_cp	0.12 uM	24 h	Epithelial Cell
Bone Marrow Stem Cell;AT-7867;trt_cp;0.12 uM;24 h	331	5	-0.522706	-0.207046	0.845682	0.913339	AT-7867	trt_cp	0.12 uM	24 h	Bone Marrow Stem Cell
Neural Progenitor Cell;MLN-8054;trt_cp;0.12 uM;24 h	1286	9	-6.25281	-4.29441	0.0020847	0.021765	MLN-8054	trt_cp	0.12 uM	24 h	Neural Progenitor Cell
Adipose-derived Stem Cell;BMS-509744;trt_cp;0.12 uM;24 h	478	5	3.36757	2.08725	0.100482	0.268924	BMS-509744	trt_cp	0.12 uM	24 h	Adipose-derived Stem Cell
HSC;BMS-509744;trt_cp;0.12 uM;24 h	179	3	-1.50274	-1.80343	0.173665	0.365929	BMS-509744	trt_cp	0.12 uM	24 h	HSC
Neural Progenitor Cell;dasatinib;trt_cp;0.12 uM;24 h	1286	25	-6.95615	-8.52831	6.12733e-10	6.90273e-08	dasatinib	trt_cp	0.12 uM	24 h	Neural Progenitor Cell
Bone Marrow Stem Cell;ponatinib;trt_cp;0.12 uM;24 h	331	6	-4.20656	-1.73051	0.141439	0.326361	ponatinib	trt_cp	0.12 uM	24 h	Bone Marrow Stem Cell
Endothelial Cell;ACY-1215;trt_cp;0.12 uM;24 h	569	5	-1.64192	-0.84196	0.446302	0.629484	ACY-1215	trt_cp	0.12 uM	24 h	Endothelial Cell
Adipose-derived Stem Cell;PF-03758309;trt_cp;0.12 uM;24 h	478	4	4.99308	4.90938	0.0104855	0.0688062	PF-03758309	trt_cp	0.12 uM	24 h	Adipose-derived Stem Cell
Bone Marrow Stem Cell;regorafenib;trt_cp;0.12 uM;24 h	331	6	-1.97533	-0.882546	0.415838	0.604391	regorafenib	trt_cp	0.12 uM	24 h	Bone Marrow Stem Cell
HSC;CGK-733;trt_cp;0.12 uM;24 h	179	3	-4.04639	-1.81807	0.204924	0.401075	CGK-733	trt_cp	0.12 uM	24 h	HSC
Endothelial Cell;LY-2603618;trt_cp;0.12 uM;24 h	569	5	-2.49843	-1.78341	0.146272	0.332136	LY-2603618	trt_cp	0.12 uM	24 h	Endothelial Cell
Adipose-derived Stem Cell;WZ-4002;trt_cp;0.12 uM;24 h	478	4	7.97681	3.19069	0.0477439	0.175829	WZ-4002	trt_cp	0.12 uM	24 h	Adipose-derived Stem Cell
Neural Progenitor Cell;JWE-035;trt_cp;0.12 uM;24 h	1286	9	-6.10588	-5.20136	0.000494383	0.00700998	JWE-035	trt_cp	0.12 uM	24 h	Neural Progenitor Cell
Endothelial Cell;HMN-214;trt_cp;0.12 uM;24 h	569	4	0.870453	0.812456	0.472375	0.650169	HMN-214	trt_cp	0.12 uM	24 h	Endothelial Cell
Bone Marrow Stem Cell;TPCA-1;trt_cp;0.12 uM;24 h	331	5	-2.74157	-0.755254	0.491323	0.665257	TPCA-1	trt_cp	0.12 uM	24 h	Bone Marrow Stem Cell
Neural Progenitor Cell;rigosertib;trt_cp;0.12 uM;24 h	1286	9	-5.91246	-6.98744	2.33424e-05	0.000628782	rigosertib	trt_cp	0.12 uM	24 h	Neural Progenitor Cell
Bone Marrow Stem Cell;dacomitinib;trt_cp;0.12 uM;24 h	331	5	-2.393	-1.01669	0.364208	0.559751	dacomitinib	trt_cp	0.12 uM	24 h	Bone Marrow Stem Cell
Neural Progenitor Cell;GNF-2;trt_cp;0.12 uM;24 h	1286	9	-6.758	-5.54943	0.000321889	0.00501174	GNF-2	trt_cp	0.12 uM	24 h	Neural Progenitor Cell
Epithelial Cell;HG-6-64-01;trt_cp;0.12 uM;24 h	4104	3	9.47243	10.6523	0.00774139	0.0561597	HG-6-64-01	trt_cp	0.12 uM	24 h	Epithelial Cell
Epithelial Cell;BRD-K49893531;trt_cp;0.12 uM;24 h	4104	3	-8.47755	-2.94881	0.0979647	0.265006	BRD-K49893531	trt_cp	0.12 uM	24 h	Epithelial Cell
Adipose-derived Stem Cell;PF-573228;trt_cp;0.12 uM;24 h	478	4	-0.537817	-0.226437	0.834988	0.907092	PF-573228	trt_cp	0.12 uM	24 h	Adipose-derived Stem Cell
Neural Progenitor Cell;ACY-1215;trt_cp;0.12 uM;24 h	1286	9	-6.1126	-6.56252	5.43012e-05	0.00124843	ACY-1215	trt_cp	0.12 uM	24 h	Neural Progenitor Cell
Neural Progenitor Cell;PD-0325901;trt_cp;0.12 uM;24 h	1286	25	-7.01244	-10.3491	6.65992e-13	1.64953e-10	PD-0325901	trt_cp	0.12 uM	24 h	Neural Progenitor Cell
Neural Progenitor Cell;I-BET-151;trt_cp;0.12 uM;24 h	1286	8	-7.84225	-7.80665	3.22993e-05	0.000824554	I-BET-151	trt_cp	0.12 uM	24 h	Neural Progenitor Cell
Bone Marrow Stem Cell;vorinostat;trt_cp;0.12 uM;24 h	331	4	3.45693	1.24013	0.300334	0.50103	vorinostat	trt_cp	0.12 uM	24 h	Bone Marrow Stem Cell
Neural Progenitor Cell;FR-180204;trt_cp;0.12 uM;24 h	1286	7	-6.30931	-5.09213	0.00146763	0.0166139	FR-180204	trt_cp	0.12 uM	24 h	Neural Progenitor Cell
Bone Marrow Stem Cell;GSK-J2;trt_cp;0.12 uM;24 h	331	4	3.0064	0.485585	0.6603	0.793521	GSK-J2	trt_cp	0.12 uM	24 h	Bone Marrow Stem Cell
Adipose-derived Stem Cell;ALW-II-49-7;trt_cp;0.12 uM;24 h	478	4	6.15384	7.49985	0.00171991	0.0188302	ALW-II-49-7	trt_cp	0.12 uM	24 h	Adipose-derived Stem Cell
Bone Marrow Stem Cell;SB-216763;trt_cp;0.12 uM;24 h	331	5	-4.11359	-2.10488	0.0982596	0.265541	SB-216763	trt_cp	0.12 uM	24 h	Bone Marrow Stem Cell
Adipose-derived Stem Cell;PF-04217903;trt_cp;0.12 uM;24 h	478	6	2.36907	1.02241	0.352023	0.54939	PF-04217903	trt_cp	0.12 uM	24 h	Adipose-derived Stem Cell
Adipose-derived Stem Cell;MLN-8054;trt_cp;0.12 uM;24 h	478	4	0.258815	0.219619	0.838621	0.908983	MLN-8054	trt_cp	0.12 uM	24 h	Adipose-derived Stem Cell
Epithelial Cell;ZM-447439;trt_cp;0.12 uM;24 h	4104	4	15.8991	1.61873	0.203916	0.400093	ZM-447439	trt_cp	0.12 uM	24 h	Epithelial Cell
Epithelial Cell;BRD-K75627148;trt_cp;0.12 uM;24 h	4104	3	25.5832	5.4212	0.0322993	0.139949	BRD-K75627148	trt_cp	0.12 uM	24 h	Epithelial Cell
Epithelial Cell;genistein;trt_cp;0.12 uM;24 h	4104	14	26.5413	12.6269	1.05885e-08	8.76262e-07	genistein	trt_cp	0.12 uM	24 h	Epithelial Cell
Epithelial Cell;BRD-K54606188;trt_cp;0.12 uM;24 h	4104	5	-8.24911	-3.34463	0.0285247	0.129688	BRD-K54606188	trt_cp	0.12 uM	24 h	Epithelial Cell
Adipose-derived Stem Cell;SB-525334;trt_cp;0.12 uM;24 h	478	5	6.11312	3.95648	0.0144227	0.0848834	SB-525334	trt_cp	0.12 uM	24 h	Adipose-derived Stem Cell
Bone Marrow Stem Cell;OSI-930;trt_cp;0.12 uM;24 h	331	5	2.28844	0.865583	0.433793	0.619109	OSI-930	trt_cp	0.12 uM	24 h	Bone Marrow Stem Cell
Bone Marrow Stem Cell;LY-2603618;trt_cp;0.12 uM;24 h	331	4	4.05683	0.777571	0.492995	0.666412	LY-2603618	trt_cp	0.12 uM	24 h	Bone Marrow Stem Cell
Neural Progenitor Cell;rucaparib;trt_cp;0.12 uM;24 h	1286	9	-7.69925	-7.52624	2.14463e-05	0.000590204	rucaparib	trt_cp	0.12 uM	24 h	Neural Progenitor Cell
Neural Progenitor Cell;GSK-1059615;trt_cp;0.12 uM;24 h	1286	34	-8.30009	-16.5418	8.51306e-30	1.41572e-26	GSK-1059615	trt_cp	0.12 uM	24 h	Neural Progenitor Cell
Bone Marrow Stem Cell;KW-2449;trt_cp;0.12 uM;24 h	331	5	-1.08825	-0.356748	0.738809	0.84717	KW-2449	trt_cp	0.12 uM	24 h	Bone Marrow Stem Cell
Endothelial Cell;MK-1775;trt_cp;0.12 uM;24 h	569	5	-1.92055	-1.61488	0.177776	0.370656	MK-1775	trt_cp	0.12 uM	24 h	Endothelial Cell
Endothelial Cell;entinostat;trt_cp;0.12 uM;24 h	569	5	-2.69602	-2.56017	0.0584533	0.197347	entinostat	trt_cp	0.12 uM	24 h	Endothelial Cell
Neural Progenitor Cell;UNC-669;trt_cp;0.12 uM;24 h	1286	9	-7.59697	-7.45647	2.29852e-05	0.000621294	UNC-669	trt_cp	0.12 uM	24 h	Neural Progenitor Cell
Neural Progenitor Cell;JW-55;trt_cp;0.12 uM;24 h	1286	8	-7.98452	-7.4056	5.68221e-05	0.00129426	JW-55	trt_cp	0.12 uM	24 h	Neural Progenitor Cell
Embryonic Stem Cell;OSI-930;trt_cp;0.12 uM;24 h	107	3	-7.58264	-8.34986	2.56687e-13	7.17142e-11	OSI-930	trt_cp	0.12 uM	24 h	Embryonic Stem Cell
Epithelial Cell;BRD-K68552125;trt_cp;0.12 uM;24 h	4104	3	-1.13571	-2.04144	0.167318	0.357977	BRD-K68552125	trt_cp	0.12 uM	24 h	Epithelial Cell
Kidney Cell;dasatinib;trt_cp;0.12 uM;24 h	1114	7	-0.232839	-0.144883	0.889452	0.938864	dasatinib	trt_cp	0.12 uM	24 h	Kidney Cell
Kidney Cell;JWE-035;trt_cp;0.12 uM;24 h	1114	3	-1.26306	-0.42127	0.714297	0.830041	JWE-035	trt_cp	0.12 uM	24 h	Kidney Cell
Kidney Cell;CGP-60474;trt_cp;0.12 uM;24 h	1114	4	2.5448	0.766426	0.498961	0.67113	CGP-60474	trt_cp	0.12 uM	24 h	Kidney Cell
Endothelial Cell;methylstat;trt_cp;0.12 uM;24 h	569	5	-2.23418	-1.04149	0.355537	0.552824	methylstat	trt_cp	0.12 uM	24 h	Endothelial Cell
Kidney Cell;SGX-523;trt_cp;0.12 uM;24 h	1114	3	-2.99815	-1.67695	0.23346	0.433492	SGX-523	trt_cp	0.12 uM	24 h	Kidney Cell
Kidney Cell;PD-0325901;trt_cp;0.12 uM;24 h	1114	7	1.64464	1.73958	0.129639	0.310031	PD-0325901	trt_cp	0.12 uM	24 h	Kidney Cell
Endothelial Cell;NVP-BHG712;trt_cp;0.12 uM;24 h	569	4	-2.71717	-1.42538	0.24744	0.448683	NVP-BHG712	trt_cp	0.12 uM	24 h	Endothelial Cell
Embryonic Stem Cell;JNJ-7706621;trt_cp;0.12 uM;24 h	107	3	11.1845	10.547	4.83404e-10	5.55327e-08	JNJ-7706621	trt_cp	0.12 uM	24 h	Embryonic Stem Cell
Embryonic Stem Cell;GDC-0199;trt_cp;0.12 uM;24 h	107	3	11.4587	3.78294	0.0471981	0.174666	GDC-0199	trt_cp	0.12 uM	24 h	Embryonic Stem Cell
Embryonic Stem Cell;masitinib;trt_cp;0.12 uM;24 h	107	6	3.02815	0.622898	0.558909	0.717539	masitinib	trt_cp	0.12 uM	24 h	Embryonic Stem Cell
Embryonic Stem Cell;roscovitine;trt_cp;0.12 uM;24 h	107	3	11.7226	6.37052	0.00516736	0.0424811	roscovitine	trt_cp	0.12 uM	24 h	Embryonic Stem Cell
Neural Progenitor Cell;kcl;trt_cp;0.12 uM;6 h	73	64	-5.26905	-2.47284	0.0146502	0.0855854	kcl	trt_cp	0.12 uM	6 h	Neural Progenitor Cell
Epithelial Cell;XMD-1150;trt_cp;0.12 uM;24 h	4104	6	-0.0256509	-0.0157127	0.988066	0.994012	XMD-1150	trt_cp	0.12 uM	24 h	Epithelial Cell
Epithelial Cell;TG-101348;trt_cp;0.12 uM;24 h	4104	3	4.42287	2.25802	0.151637	0.339584	TG-101348	trt_cp	0.12 uM	24 h	Epithelial Cell
Epithelial Cell;ly-ester;trt_cp;0.12 uM;24 h	4104	3	-9.4882	-9.98808	0.00895233	0.0618261	ly-ester	trt_cp	0.12 uM	24 h	Epithelial Cell
Endothelial Cell;AZD-7762;trt_cp;0.12 uM;24 h	569	3	-7.15277	-2.65899	0.115806	0.290967	AZD-7762	trt_cp	0.12 uM	24 h	Endothelial Cell
Neural Progenitor Cell;GDC-0068;trt_cp;0.12 uM;24 h	1286	7	-7.48713	-9.4417	7.69405e-06	0.000257622	GDC-0068	trt_cp	0.12 uM	24 h	Neural Progenitor Cell
Neural Progenitor Cell;BIX-01294;trt_cp;0.12 uM;24 h	1286	9	-7.12178	-5.98038	0.000179786	0.00321489	BIX-01294	trt_cp	0.12 uM	24 h	Neural Progenitor Cell
Bone Marrow Stem Cell;BRD-K29983336;trt_cp;0.12 uM;24 h	331	6	-3.04206	-1.56585	0.174068	0.366459	BRD-K29983336	trt_cp	0.12 uM	24 h	Bone Marrow Stem Cell
Endothelial Cell;AZ-628;trt_cp;0.12 uM;24 h	569	3	1.80353	2.13811	0.152248	0.340199	AZ-628	trt_cp	0.12 uM	24 h	Endothelial Cell
Neural Progenitor Cell;idelalisib;trt_cp;0.12 uM;24 h	1286	6	-6.86976	-6.40931	0.000656842	0.00881393	idelalisib	trt_cp	0.12 uM	24 h	Neural Progenitor Cell
Endothelial Cell;UNC-669;trt_cp;0.12 uM;24 h	569	5	-2.69038	-2.085	0.102212	0.271726	UNC-669	trt_cp	0.12 uM	24 h	Endothelial Cell
Bone Marrow Stem Cell;BIX-02189;trt_cp;0.12 uM;24 h	331	5	-1.91629	-1.18813	0.29429	0.49584	BIX-02189	trt_cp	0.12 uM	24 h	Bone Marrow Stem Cell
Bone Marrow Stem Cell;bosutinib;trt_cp;0.12 uM;24 h	331	5	-3.15234	-1.63393	0.172513	0.36449	bosutinib	trt_cp	0.12 uM	24 h	Bone Marrow Stem Cell
Endothelial Cell;RG-108;trt_cp;0.12 uM;24 h	569	5	-2.93953	-2.44033	0.0678383	0.215257	RG-108	trt_cp	0.12 uM	24 h	Endothelial Cell
Bone Marrow Stem Cell;KIN001-055;trt_cp;0.12 uM;24 h	331	4	3.94614	0.73243	0.516489	0.684841	KIN001-055	trt_cp	0.12 uM	24 h	Bone Marrow Stem Cell
HSC;VX-745;trt_cp;0.12 uM;24 h	179	3	2.90483	0.52104	0.653953	0.788741	VX-745	trt_cp	0.12 uM	24 h	HSC
Endothelial Cell;ZM-447439;trt_cp;0.12 uM;24 h	569	3	-2.01613	-1.29043	0.322477	0.522253	ZM-447439	trt_cp	0.12 uM	24 h	Endothelial Cell
Neural Progenitor Cell;SB-239063;trt_cp;0.12 uM;24 h	1286	9	-6.94998	-7.31943	2.23359e-05	0.000606561	SB-239063	trt_cp	0.12 uM	24 h	Neural Progenitor Cell
Epithelial Cell;HG-5-88-01;trt_cp;0.12 uM;24 h	4104	3	4.68838	4.32319	0.0476132	0.175604	HG-5-88-01	trt_cp	0.12 uM	24 h	Epithelial Cell
Epithelial Cell;withaferin-a;trt_cp;0.12 uM;24 h	4104	10	4.00277	1.42444	0.187947	0.382113	withaferin-a	trt_cp	0.12 uM	24 h	Epithelial Cell
Bone Marrow Stem Cell;PD-0325901;trt_cp;0.12 uM;24 h	331	14	1.54838	1.1018	0.287937	0.49021	PD-0325901	trt_cp	0.12 uM	24 h	Bone Marrow Stem Cell
Neural Progenitor Cell;LY-2603618;trt_cp;0.12 uM;24 h	1286	9	-6.31827	-5.3348	0.00041594	0.00610515	LY-2603618	trt_cp	0.12 uM	24 h	Neural Progenitor Cell
Bone Marrow Stem Cell;ABT-737;trt_cp;0.12 uM;24 h	331	4	3.33731	0.842435	0.460435	0.64042	ABT-737	trt_cp	0.12 uM	24 h	Bone Marrow Stem Cell
HSC;ischemin;trt_cp;0.12 uM;24 h	179	3	0.977146	0.329571	0.772326	0.86843	ischemin	trt_cp	0.12 uM	24 h	HSC
Endothelial Cell;GDC-0879;trt_cp;0.12 uM;24 h	569	4	1.21137	0.909629	0.427429	0.613661	GDC-0879	trt_cp	0.12 uM	24 h	Endothelial Cell
HSC;BRD-K29983336;trt_cp;0.12 uM;24 h	179	3	-0.0443916	-0.0417513	0.969833	0.983634	BRD-K29983336	trt_cp	0.12 uM	24 h	HSC
Bone Marrow Stem Cell;GDC-0068;trt_cp;0.12 uM;24 h	331	5	-0.395857	-0.207235	0.845245	0.913179	GDC-0068	trt_cp	0.12 uM	24 h	Bone Marrow Stem Cell
Neural Progenitor Cell;MC1568;trt_cp;0.12 uM;24 h	1286	9	-8.1222	-7.63298	2.09239e-05	0.000580401	MC1568	trt_cp	0.12 uM	24 h	Neural Progenitor Cell
Adipose-derived Stem Cell;idelalisib;trt_cp;0.12 uM;24 h	478	4	5.38649	3.68525	0.0299817	0.133757	idelalisib	trt_cp	0.12 uM	24 h	Adipose-derived Stem Cell
Neural Progenitor Cell;BRD-K68336408;trt_cp;0.12 uM;24 h	1286	7	-8.08159	-6.89747	0.000227083	0.00384039	BRD-K68336408	trt_cp	0.12 uM	24 h	Neural Progenitor Cell
Adipose-derived Stem Cell;TPCA-1;trt_cp;0.12 uM;24 h	478	4	7.3518	2.19635	0.114148	0.288861	TPCA-1	trt_cp	0.12 uM	24 h	Adipose-derived Stem Cell
Neural Progenitor Cell;KI-20227;trt_cp;0.12 uM;24 h	1286	9	-7.50893	-8.49868	4.491e-06	0.000164402	KI-20227	trt_cp	0.12 uM	24 h	Neural Progenitor Cell
Epithelial Cell;estradiol;trt_cp;0.12 uM;24 h	4104	7	26.5515	18.1308	1.61097e-06	7.06781e-05	estradiol	trt_cp	0.12 uM	24 h	Epithelial Cell
Adipose-derived Stem Cell;BRD-K55591206;trt_cp;0.12 uM;24 h	478	4	0.948128	0.275094	0.800854	0.886586	BRD-K55591206	trt_cp	0.12 uM	24 h	Adipose-derived Stem Cell
Fibroblast;mitoxantrone;trt_cp;0.12 uM;24 h	329	11	13.6911	4.35925	0.00123852	0.0145486	mitoxantrone	trt_cp	0.12 uM	24 h	Fibroblast
Bone Marrow Stem Cell;Y-27632;trt_cp;0.12 uM;24 h	331	4	1.31412	0.373639	0.733013	0.843411	Y-27632	trt_cp	0.12 uM	24 h	Bone Marrow Stem Cell
Endothelial Cell;BGT-226;trt_cp;0.12 uM;24 h	569	3	3.92076	2.06285	0.172476	0.364458	BGT-226	trt_cp	0.12 uM	24 h	Endothelial Cell
Adipose-derived Stem Cell;GSK-429286A;trt_cp;0.12 uM;24 h	478	4	5.13724	5.45249	0.00683706	0.0517148	GSK-429286A	trt_cp	0.12 uM	24 h	Adipose-derived Stem Cell
Bone Marrow Stem Cell;KIN001-260;trt_cp;0.12 uM;24 h	331	6	-2.91395	-1.17737	0.28985	0.4918	KIN001-260	trt_cp	0.12 uM	24 h	Bone Marrow Stem Cell
Endothelial Cell;KU-60019;trt_cp;0.12 uM;24 h	569	4	-1.17427	-0.760747	0.500494	0.672285	KU-60019	trt_cp	0.12 uM	24 h	Endothelial Cell
Adipose-derived Stem Cell;BRD-K09991945;trt_cp;0.12 uM;24 h	478	5	4.35855	2.88983	0.0405132	0.160395	BRD-K09991945	trt_cp	0.12 uM	24 h	Adipose-derived Stem Cell
Neural Progenitor Cell;ischemin;trt_cp;0.12 uM;24 h	1286	9	-8.50389	-7.16793	4.35061e-05	0.00104137	ischemin	trt_cp	0.12 uM	24 h	Neural Progenitor Cell
Neural Progenitor Cell;vandetanib;trt_cp;0.12 uM;24 h	1286	7	-7.55026	-6.39255	0.000366918	0.00554474	vandetanib	trt_cp	0.12 uM	24 h	Neural Progenitor Cell
Neural Progenitor Cell;MK-1775;trt_cp;0.12 uM;24 h	1286	9	-7.59112	-6.50865	9.10099e-05	0.00188625	MK-1775	trt_cp	0.12 uM	24 h	Neural Progenitor Cell
Bone Marrow Stem Cell;RAF-265;trt_cp;0.12 uM;24 h	331	6	0.895053	0.405469	0.701015	0.820907	RAF-265	trt_cp	0.12 uM	24 h	Bone Marrow Stem Cell
Bone Marrow Stem Cell;RG-108;trt_cp;0.12 uM;24 h	331	4	2.88856	0.660178	0.55569	0.715182	RG-108	trt_cp	0.12 uM	24 h	Bone Marrow Stem Cell
Neural Progenitor Cell;dabrafenib;trt_cp;0.12 uM;24 h	1286	8	-8.7869	-17.1906	3.1579e-13	8.48333e-11	dabrafenib	trt_cp	0.12 uM	24 h	Neural Progenitor Cell
Neural Progenitor Cell;saracatinib;trt_cp;0.12 uM;24 h	1286	9	-7.8447	-10.4664	2.05169e-07	1.18824e-05	saracatinib	trt_cp	0.12 uM	24 h	Neural Progenitor Cell
Neural Progenitor Cell;CX-5461;trt_cp;0.12 uM;24 h	1286	9	-5.76105	-7.9851	2.89385e-06	0.000115105	CX-5461	trt_cp	0.12 uM	24 h	Neural Progenitor Cell
Bone Marrow Stem Cell;SGX-523;trt_cp;0.12 uM;24 h	331	6	-1.00111	-0.452262	0.669032	0.799538	SGX-523	trt_cp	0.12 uM	24 h	Bone Marrow Stem Cell
Neural Progenitor Cell;KIN001-269;trt_cp;0.12 uM;24 h	1286	9	-8.77132	-8.37082	9.13687e-06	0.000294812	KIN001-269	trt_cp	0.12 uM	24 h	Neural Progenitor Cell
Neural Progenitor Cell;RG-108;trt_cp;0.12 uM;24 h	1286	9	-7.53191	-6.36253	0.000111015	0.00222049	RG-108	trt_cp	0.12 uM	24 h	Neural Progenitor Cell
Embryonic Stem Cell;SB-216763;trt_cp;0.12 uM;24 h	107	3	-7.5491	-7.44511	1.32023e-08	1.05749e-06	SB-216763	trt_cp	0.12 uM	24 h	Embryonic Stem Cell
Embryonic Stem Cell;PHA-767491;trt_cp;0.12 uM;24 h	107	3	-8.21713	-8.95475	1.49301e-14	6.09759e-12	PHA-767491	trt_cp	0.12 uM	24 h	Embryonic Stem Cell
Kidney Cell;BRD-K29983336;trt_cp;0.12 uM;24 h	1114	3	-3.00304	-2.45419	0.129103	0.309337	BRD-K29983336	trt_cp	0.12 uM	24 h	Kidney Cell
Kidney Cell;AZD-1480;trt_cp;0.12 uM;24 h	1114	3	-0.0380569	-0.0391842	0.972124	0.985044	AZD-1480	trt_cp	0.12 uM	24 h	Kidney Cell
Kidney Cell;MGCD-265;trt_cp;0.12 uM;24 h	1114	3	-0.0653306	-0.0338031	0.976065	0.98726	MGCD-265	trt_cp	0.12 uM	24 h	Kidney Cell
Kidney Cell;NVP-BHG712;trt_cp;0.12 uM;24 h	1114	3	-1.7272	-5.62693	0.00518589	0.0425808	NVP-BHG712	trt_cp	0.12 uM	24 h	Kidney Cell
Endothelial Cell;UNC-0638;trt_cp;0.12 uM;24 h	569	5	-2.1699	-1.59739	0.182458	0.375946	UNC-0638	trt_cp	0.12 uM	24 h	Endothelial Cell
Kidney Cell;SB-239063;trt_cp;0.12 uM;24 h	1114	3	-0.504207	-0.350614	0.758594	0.859388	SB-239063	trt_cp	0.12 uM	24 h	Kidney Cell
Embryonic Stem Cell;atorvastatin;trt_cp;0.12 uM;24 h	107	3	12.9813	8.26733	0.000783575	0.0101276	atorvastatin	trt_cp	0.12 uM	24 h	Embryonic Stem Cell
Embryonic Stem Cell;mitomycin-c;trt_cp;0.12 uM;24 h	107	3	11.0069	5.36691	0.012117	0.0756454	mitomycin-c	trt_cp	0.12 uM	24 h	Embryonic Stem Cell
Embryonic Stem Cell;emetine;trt_cp;0.12 uM;24 h	107	3	8.81869	5.08231	0.00862245	0.0604761	emetine	trt_cp	0.12 uM	24 h	Embryonic Stem Cell
Embryonic Stem Cell;tozasertib;trt_cp;0.12 uM;24 h	107	3	15.5178	6.4353	0.0104982	0.0688505	tozasertib	trt_cp	0.12 uM	24 h	Embryonic Stem Cell
Embryonic Stem Cell;panobinostat;trt_cp;0.12 uM;24 h	107	3	16.6317	11.422	7.51999e-05	0.00162312	panobinostat	trt_cp	0.12 uM	24 h	Embryonic Stem Cell
Embryonic Stem Cell;palbociclib;trt_cp;0.12 uM;24 h	107	3	12.0152	7.98019	0.000620447	0.0083984	palbociclib	trt_cp	0.12 uM	24 h	Embryonic Stem Cell
Embryonic Stem Cell;tamibarotene;trt_cp;0.12 uM;24 h	107	3	7.78816	6.53799	5.77902e-05	0.00130882	tamibarotene	trt_cp	0.12 uM	24 h	Embryonic Stem Cell
Embryonic Stem Cell;KW-2478;trt_cp;0.12 uM;24 h	107	3	11.7962	7.13068	0.00205971	0.0215427	KW-2478	trt_cp	0.12 uM	24 h	Embryonic Stem Cell
Neural Progenitor Cell;kcl;trt_cp;0.12 uM;24 h	1286	67	8.77377	4.20723	7.61101e-05	0.00163972	kcl	trt_cp	0.12 uM	24 h	Neural Progenitor Cell
Epithelial Cell;toremifene;trt_cp;0.12 uM;24 h	4104	6	27.2553	20.8875	4.04042e-06	0.000152372	toremifene	trt_cp	0.12 uM	24 h	Epithelial Cell
Epithelial Cell;BRD-K58479490;trt_cp;0.12 uM;24 h	4104	3	-2.79049	-0.666246	0.573729	0.728865	BRD-K58479490	trt_cp	0.12 uM	24 h	Epithelial Cell
Endothelial Cell;sunitinib;trt_cp;0.12 uM;24 h	569	3	-3.40363	-1.86726	0.199872	0.395542	sunitinib	trt_cp	0.12 uM	24 h	Endothelial Cell
Adipose-derived Stem Cell;AZD-4547;trt_cp;0.12 uM;24 h	478	4	3.59893	2.61028	0.0721903	0.223225	AZD-4547	trt_cp	0.12 uM	24 h	Adipose-derived Stem Cell
Neural Progenitor Cell;A-66;trt_cp;0.12 uM;24 h	1286	7	-9.18624	-6.88421	0.00027213	0.00438597	A-66	trt_cp	0.12 uM	24 h	Neural Progenitor Cell
Adipose-derived Stem Cell;CGK-733;trt_cp;0.12 uM;24 h	478	3	0.555433	0.483591	0.670863	0.800839	CGK-733	trt_cp	0.12 uM	24 h	Adipose-derived Stem Cell
HSC;D-4476;trt_cp;0.12 uM;24 h	179	3	1.42811	0.338978	0.766544	0.864665	D-4476	trt_cp	0.12 uM	24 h	HSC
Neural Progenitor Cell;Y-27632;trt_cp;0.12 uM;24 h	1286	9	-7.40282	-7.6438	1.61848e-05	0.000469763	Y-27632	trt_cp	0.12 uM	24 h	Neural Progenitor Cell
Neural Progenitor Cell;vorinostat;trt_cp;0.12 uM;24 h	1286	9	-7.08639	-6.92624	4.32257e-05	0.00103537	vorinostat	trt_cp	0.12 uM	24 h	Neural Progenitor Cell
Bone Marrow Stem Cell;I-BET-762;trt_cp;0.12 uM;24 h	331	4	3.45862	1.06513	0.363134	0.558768	I-BET-762	trt_cp	0.12 uM	24 h	Bone Marrow Stem Cell
Epithelial Cell;QL-XII-47;trt_cp;0.12 uM;24 h	4104	3	3.5056	1.27946	0.328724	0.528288	QL-XII-47	trt_cp	0.12 uM	24 h	Epithelial Cell
Epithelial Cell;SGC-CBP30;trt_cp;0.12 uM;24 h	4104	3	-6.46259	-2.74999	0.110136	0.283383	SGC-CBP30	trt_cp	0.12 uM	24 h	Epithelial Cell
Bone Marrow Stem Cell;PF-04217903;trt_cp;0.12 uM;24 h	331	5	-3.54329	-1.63863	0.17256	0.364533	PF-04217903	trt_cp	0.12 uM	24 h	Bone Marrow Stem Cell
Bone Marrow Stem Cell;JNJ-38877605;trt_cp;0.12 uM;24 h	331	6	-1.90999	-0.699129	0.514578	0.683397	JNJ-38877605	trt_cp	0.12 uM	24 h	Bone Marrow Stem Cell
Endothelial Cell;KIN001-244;trt_cp;0.12 uM;24 h	569	3	-2.93769	-3.13079	0.0789811	0.234745	KIN001-244	trt_cp	0.12 uM	24 h	Endothelial Cell
Endothelial Cell;dacomitinib;trt_cp;0.12 uM;24 h	569	3	0.656973	0.829724	0.484738	0.660161	dacomitinib	trt_cp	0.12 uM	24 h	Endothelial Cell
Bone Marrow Stem Cell;decitabine;trt_cp;0.12 uM;24 h	331	4	3.10699	0.879069	0.442814	0.626648	decitabine	trt_cp	0.12 uM	24 h	Bone Marrow Stem Cell
Adipose-derived Stem Cell;chelerythrine;trt_cp;0.12 uM;24 h	478	4	0.591207	0.4887	0.65486	0.789453	chelerythrine	trt_cp	0.12 uM	24 h	Adipose-derived Stem Cell
Bone Marrow Stem Cell;PF-03758309;trt_cp;0.12 uM;24 h	331	6	3.54276	1.98979	0.0985043	0.265873	PF-03758309	trt_cp	0.12 uM	24 h	Bone Marrow Stem Cell
Endothelial Cell;SB-239063;trt_cp;0.12 uM;24 h	569	4	-1.95803	-1.74704	0.173342	0.365512	SB-239063	trt_cp	0.12 uM	24 h	Endothelial Cell
Epithelial Cell;sirolimus;trt_cp;0.12 uM;24 h	4104	5	21.4956	4.44767	0.0112383	0.0720422	sirolimus	trt_cp	0.12 uM	24 h	Epithelial Cell
Epithelial Cell;tacedinaline;trt_cp;0.12 uM;24 h	4104	3	19.9265	20.8701	0.00198976	0.0209935	tacedinaline	trt_cp	0.12 uM	24 h	Epithelial Cell
Adipose-derived Stem Cell;amuvatinib;trt_cp;0.12 uM;24 h	478	5	6.25589	5.37652	0.00389585	0.0344893	amuvatinib	trt_cp	0.12 uM	24 h	Adipose-derived Stem Cell
Epithelial Cell;GSK-1059615;trt_cp;0.12 uM;24 h	4104	9	0.494008	0.13756	0.893981	0.941454	GSK-1059615	trt_cp	0.12 uM	24 h	Epithelial Cell
Epithelial Cell;RVX-208;trt_cp;0.12 uM;24 h	4104	3	-7.28195	-1.52663	0.266261	0.468422	RVX-208	trt_cp	0.12 uM	24 h	Epithelial Cell
Bone Marrow Stem Cell;saracatinib;trt_cp;0.12 uM;24 h	331	6	1.63404	0.656209	0.539485	0.702686	saracatinib	trt_cp	0.12 uM	24 h	Bone Marrow Stem Cell
Neural Progenitor Cell;KU-60019;trt_cp;0.12 uM;24 h	1286	9	-6.1865	-4.0382	0.00310084	0.0292757	KU-60019	trt_cp	0.12 uM	24 h	Neural Progenitor Cell
Neural Progenitor Cell;garcinol;trt_cp;0.12 uM;24 h	1286	9	-5.61948	-4.31411	0.00190662	0.020325	garcinol	trt_cp	0.12 uM	24 h	Neural Progenitor Cell
Neural Progenitor Cell;AZD-4547;trt_cp;0.12 uM;24 h	1286	7	-2.95379	-2.03495	0.0834814	0.242147	AZD-4547	trt_cp	0.12 uM	24 h	Neural Progenitor Cell
Epithelial Cell;BRD-K12901964;trt_cp;0.12 uM;24 h	4104	3	-2.5033	-0.711616	0.550373	0.711271	BRD-K12901964	trt_cp	0.12 uM	24 h	Epithelial Cell
Adipose-derived Stem Cell;MLN-0128;trt_cp;0.12 uM;24 h	478	4	13.622	4.86093	0.0157681	0.089861	MLN-0128	trt_cp	0.12 uM	24 h	Adipose-derived Stem Cell
Bone Marrow Stem Cell;SB-203580;trt_cp;0.12 uM;24 h	331	5	0.342094	0.105289	0.921092	0.95724	SB-203580	trt_cp	0.12 uM	24 h	Bone Marrow Stem Cell
Neural Progenitor Cell;sunitinib;trt_cp;0.12 uM;24 h	1286	6	-8.60903	-9.85744	3.07829e-05	0.000792213	sunitinib	trt_cp	0.12 uM	24 h	Neural Progenitor Cell
Neural Progenitor Cell;TPCA-1;trt_cp;0.12 uM;24 h	1286	7	-8.85664	-6.45052	0.00041315	0.00607513	TPCA-1	trt_cp	0.12 uM	24 h	Neural Progenitor Cell
Endothelial Cell;AZD-9291;trt_cp;0.12 uM;24 h	569	3	0.800097	0.590142	0.612685	0.757892	AZD-9291	trt_cp	0.12 uM	24 h	Endothelial Cell
Embryonic Stem Cell;BRD-K09991945;trt_cp;0.12 uM;24 h	107	3	-6.48196	-3.95252	0.0163774	0.0919649	BRD-K09991945	trt_cp	0.12 uM	24 h	Embryonic Stem Cell
Endothelial Cell;regorafenib;trt_cp;0.12 uM;24 h	569	4	-2.43322	-4.25339	0.0141304	0.08364	regorafenib	trt_cp	0.12 uM	24 h	Endothelial Cell
Embryonic Stem Cell;PD-0325901;trt_cp;0.12 uM;24 h	107	6	4.64834	0.937449	0.38894	0.580965	PD-0325901	trt_cp	0.12 uM	24 h	Embryonic Stem Cell
Embryonic Stem Cell;vemurafenib;trt_cp;0.12 uM;24 h	107	3	9.36901	7.23032	0.000147866	0.0027541	vemurafenib	trt_cp	0.12 uM	24 h	Embryonic Stem Cell
Embryonic Stem Cell;ABT-737;trt_cp;0.12 uM;24 h	107	3	12.4441	5.19715	0.0178377	0.0968474	ABT-737	trt_cp	0.12 uM	24 h	Embryonic Stem Cell
Embryonic Stem Cell;AZD-5363;trt_cp;0.12 uM;24 h	107	3	9.14424	5.9407	0.00264563	0.0259751	AZD-5363	trt_cp	0.12 uM	24 h	Embryonic Stem Cell
Embryonic Stem Cell;trametinib;trt_cp;0.12 uM;24 h	107	3	10.411	7.62849	0.000241912	0.00401345	trametinib	trt_cp	0.12 uM	24 h	Embryonic Stem Cell
Epithelial Cell;panobinostat;trt_cp;0.12 uM;24 h	4104	3	29.785	12.3018	0.00643465	0.0496103	panobinostat	trt_cp	0.12 uM	24 h	Epithelial Cell
Epithelial Cell;isonicotinohydroxamic-acid;trt_cp;0.12 uM;24 h	4104	9	26.7655	11.942	2.12895e-06	8.95269e-05	isonicotinohydroxamic-acid	trt_cp	0.12 uM	24 h	Epithelial Cell
Epithelial Cell;A-443654;trt_cp;0.12 uM;24 h	4104	3	10.4757	8.66646	0.0123521	0.0766884	A-443654	trt_cp	0.12 uM	24 h	Epithelial Cell
Epithelial Cell;BRD-K40328231;trt_cp;0.12 uM;24 h	4104	3	-7.81553	-2.04492	0.177297	0.370343	BRD-K40328231	trt_cp	0.12 uM	24 h	Epithelial Cell
HSC;GSK-429286A;trt_cp;0.12 uM;24 h	179	3	0.957343	0.286864	0.800719	0.886516	GSK-429286A	trt_cp	0.12 uM	24 h	HSC
Endothelial Cell;GSK-1059615;trt_cp;0.12 uM;24 h	569	13	-1.63159	-1.38847	0.188857	0.38297	GSK-1059615	trt_cp	0.12 uM	24 h	Endothelial Cell
Endothelial Cell;iniparib;trt_cp;0.12 uM;24 h	569	5	-3.78119	-5.50243	0.00317707	0.029802	iniparib	trt_cp	0.12 uM	24 h	Endothelial Cell
Neural Progenitor Cell;NPK76-II-72-1;trt_cp;0.12 uM;24 h	1286	9	-8.34558	-6.37882	0.000123727	0.00241797	NPK76-II-72-1	trt_cp	0.12 uM	24 h	Neural Progenitor Cell
HSC;ZM-447439;trt_cp;0.12 uM;24 h	179	3	-3.54057	-1.99827	0.174608	0.367206	ZM-447439	trt_cp	0.12 uM	24 h	HSC
Neural Progenitor Cell;KIN001-242;trt_cp;0.12 uM;24 h	1286	9	-7.98891	-8.81643	3.53123e-06	0.000135966	KIN001-242	trt_cp	0.12 uM	24 h	Neural Progenitor Cell
Epithelial Cell;BRD-A59468452;trt_cp;0.12 uM;24 h	4104	3	-3.63356	-0.739598	0.536501	0.700659	BRD-A59468452	trt_cp	0.12 uM	24 h	Epithelial Cell
Neural Progenitor Cell;JNK-IN-5A;trt_cp;0.12 uM;24 h	1286	9	-7.18129	-7.2579	2.6875e-05	0.000706745	JNK-IN-5A	trt_cp	0.12 uM	24 h	Neural Progenitor Cell
Endothelial Cell;NPK76-II-72-1;trt_cp;0.12 uM;24 h	569	5	-1.01051	-0.836514	0.447604	0.630234	NPK76-II-72-1	trt_cp	0.12 uM	24 h	Endothelial Cell
Neural Progenitor Cell;NVP-BHG712;trt_cp;0.12 uM;24 h	1286	9	-7.79312	-8.46272	5.49776e-06	0.000193352	NVP-BHG712	trt_cp	0.12 uM	24 h	Neural Progenitor Cell
Neural Progenitor Cell;BRD-K54606188;trt_cp;0.12 uM;24 h	1286	9	-4.62482	-4.38026	0.00146417	0.0165909	BRD-K54606188	trt_cp	0.12 uM	24 h	Neural Progenitor Cell
Neural Progenitor Cell;BRD-K55591206;trt_cp;0.12 uM;24 h	1286	8	-6.95983	-6.79327	9.68668e-05	0.00198642	BRD-K55591206	trt_cp	0.12 uM	24 h	Neural Progenitor Cell
Bone Marrow Stem Cell;BRD-K54606188;trt_cp;0.12 uM;24 h	331	3	9.03306	4.87896	0.0335818	0.143688	BRD-K54606188	trt_cp	0.12 uM	24 h	Bone Marrow Stem Cell
Bone Marrow Stem Cell;GNF-2;trt_cp;0.12 uM;24 h	331	5	-0.862923	-0.246293	0.817325	0.896489	GNF-2	trt_cp	0.12 uM	24 h	Bone Marrow Stem Cell
Bone Marrow Stem Cell;KIN001-266;trt_cp;0.12 uM;24 h	331	5	-1.97745	-1.29071	0.259077	0.461409	KIN001-266	trt_cp	0.12 uM	24 h	Bone Marrow Stem Cell
Endothelial Cell;KIN-001-220;trt_cp;0.12 uM;24 h	569	3	0.111821	0.0472019	0.966589	0.982174	KIN-001-220	trt_cp	0.12 uM	24 h	Endothelial Cell
Bone Marrow Stem Cell;MLN-0128;trt_cp;0.12 uM;24 h	331	5	0.862914	0.432588	0.686197	0.810576	MLN-0128	trt_cp	0.12 uM	24 h	Bone Marrow Stem Cell
Epithelial Cell;Y-39983;trt_cp;0.12 uM;24 h	4104	3	7.56854	3.52686	0.0712473	0.221604	Y-39983	trt_cp	0.12 uM	24 h	Epithelial Cell
Epithelial Cell;SAR-245408;trt_cp;0.12 uM;24 h	4104	3	4.28766	1.10027	0.385779	0.578202	SAR-245408	trt_cp	0.12 uM	24 h	Epithelial Cell
Epithelial Cell;BRD-K91583156;trt_cp;0.12 uM;24 h	4104	3	-6.20795	-2.57572	0.122882	0.300538	BRD-K91583156	trt_cp	0.12 uM	24 h	Epithelial Cell
Endothelial Cell;pyrazolanthrone;trt_cp;0.12 uM;24 h	569	4	-1.30355	-2.36446	0.0781961	0.233505	pyrazolanthrone	trt_cp	0.12 uM	24 h	Endothelial Cell
Endothelial Cell;CC-401;trt_cp;0.12 uM;24 h	569	4	-3.13334	-1.70724	0.184213	0.378005	CC-401	trt_cp	0.12 uM	24 h	Endothelial Cell
Neural Progenitor Cell;CC-401;trt_cp;0.12 uM;24 h	1286	8	-8.34495	-5.6873	0.000521208	0.00730822	CC-401	trt_cp	0.12 uM	24 h	Neural Progenitor Cell
Bone Marrow Stem Cell;vandetanib;trt_cp;0.12 uM;24 h	331	5	-2.33442	-0.888983	0.422416	0.609638	vandetanib	trt_cp	0.12 uM	24 h	Bone Marrow Stem Cell
Neural Progenitor Cell;MGCD-265;trt_cp;0.12 uM;24 h	1286	9	-8.98138	-14.759	1.47737e-10	1.93963e-08	MGCD-265	trt_cp	0.12 uM	24 h	Neural Progenitor Cell
Neural Progenitor Cell;resveratrol;trt_cp;0.12 uM;24 h	1286	9	-6.14987	-5.98285	0.00014331	0.00268788	resveratrol	trt_cp	0.12 uM	24 h	Neural Progenitor Cell
Embryonic Stem Cell;tivantinib;trt_cp;0.12 uM;24 h	107	3	-7.6491	-8.34503	3.19595e-13	8.52003e-11	tivantinib	trt_cp	0.12 uM	24 h	Embryonic Stem Cell
Kidney Cell;desoxypeganine;trt_cp;0.12 uM;24 h	1114	3	2.05436	6.83274	0.00226713	0.0232116	desoxypeganine	trt_cp	0.12 uM	24 h	Kidney Cell
Kidney Cell;REV-5901;trt_cp;0.12 uM;24 h	1114	3	-10.8088	-4.87771	0.0386932	0.155568	REV-5901	trt_cp	0.12 uM	24 h	Kidney Cell
Kidney Cell;XMD-892;trt_cp;0.12 uM;24 h	1114	3	-2.02416	-11.0312	6.51695e-15	2.91784e-12	XMD-892	trt_cp	0.12 uM	24 h	Kidney Cell
Neural Progenitor Cell;GSK-J2;trt_cp;0.12 uM;24 h	1286	9	-8.49206	-7.51193	2.7219e-05	0.000712009	GSK-J2	trt_cp	0.12 uM	24 h	Neural Progenitor Cell
Bone Marrow Stem Cell;AGK-2;trt_cp;0.12 uM;24 h	331	4	0.0991781	0.0184014	0.986464	0.993024	AGK-2	trt_cp	0.12 uM	24 h	Bone Marrow Stem Cell
Neural Progenitor Cell;GSK-2334470;trt_cp;0.12 uM;24 h	1286	9	-7.24723	-6.5651	7.7725e-05	0.00166834	GSK-2334470	trt_cp	0.12 uM	24 h	Neural Progenitor Cell
Neural Progenitor Cell;KIN001-244;trt_cp;0.12 uM;24 h	1286	7	-8.07554	-6.17087	0.000511352	0.00719788	KIN001-244	trt_cp	0.12 uM	24 h	Neural Progenitor Cell
Neural Progenitor Cell;AST-1306;trt_cp;0.12 uM;24 h	1286	7	-8.31114	-7.41218	0.000134055	0.00256105	AST-1306	trt_cp	0.12 uM	24 h	Neural Progenitor Cell
Neural Progenitor Cell;SB-939;trt_cp;0.12 uM;24 h	1286	8	-3.71311	-2.46128	0.0403939	0.160122	SB-939	trt_cp	0.12 uM	24 h	Neural Progenitor Cell
Adipose-derived Stem Cell;rigosertib;trt_cp;0.12 uM;24 h	478	4	3.06507	2.78744	0.057604	0.195672	rigosertib	trt_cp	0.12 uM	24 h	Adipose-derived Stem Cell
Neural Progenitor Cell;rebastinib;trt_cp;0.12 uM;24 h	1286	7	-3.25361	-1.9732	0.0922991	0.256473	rebastinib	trt_cp	0.12 uM	24 h	Neural Progenitor Cell
Adipose-derived Stem Cell;SB-239063;trt_cp;0.12 uM;24 h	478	4	1.94376	1.44373	0.236153	0.436543	SB-239063	trt_cp	0.12 uM	24 h	Adipose-derived Stem Cell
Epithelial Cell;foretinib;trt_cp;0.12 uM;24 h	4104	3	-0.285774	-0.0692048	0.951115	0.973807	foretinib	trt_cp	0.12 uM	24 h	Epithelial Cell
Epithelial Cell;taladegib;trt_cp;0.12 uM;24 h	4104	3	-5.85388	-1.54775	0.261544	0.463776	taladegib	trt_cp	0.12 uM	24 h	Epithelial Cell
Adipose-derived Stem Cell;garcinol;trt_cp;0.12 uM;24 h	478	3	2.30145	3.13884	0.0548586	0.189855	garcinol	trt_cp	0.12 uM	24 h	Adipose-derived Stem Cell
Neural Progenitor Cell;BRD-K09991945;trt_cp;0.12 uM;24 h	1286	7	-6.27443	-4.87895	0.00191836	0.0204128	BRD-K09991945	trt_cp	0.12 uM	24 h	Neural Progenitor Cell
Endothelial Cell;JW-55;trt_cp;0.12 uM;24 h	569	4	-3.20906	-1.84155	0.16044	0.350126	JW-55	trt_cp	0.12 uM	24 h	Endothelial Cell
Neural Progenitor Cell;CG-930;trt_cp;0.12 uM;24 h	1286	9	-6.87929	-9.06299	1.0603e-06	4.9904e-05	CG-930	trt_cp	0.12 uM	24 h	Neural Progenitor Cell
Neural Progenitor Cell;I-BET-762;trt_cp;0.12 uM;24 h	1286	9	-5.53735	-4.50687	0.00138075	0.0158601	I-BET-762	trt_cp	0.12 uM	24 h	Neural Progenitor Cell
Bone Marrow Stem Cell;AZ-628;trt_cp;0.12 uM;24 h	331	5	1.22722	0.503895	0.639689	0.778121	AZ-628	trt_cp	0.12 uM	24 h	Bone Marrow Stem Cell
Endothelial Cell;olaparib;trt_cp;0.12 uM;24 h	569	9	0.214549	0.175783	0.864612	0.924391	olaparib	trt_cp	0.12 uM	24 h	Endothelial Cell
Neural Progenitor Cell;KIN001-266;trt_cp;0.12 uM;24 h	1286	7	-8.07504	-5.11664	0.00168969	0.0185972	KIN001-266	trt_cp	0.12 uM	24 h	Neural Progenitor Cell
Adipose-derived Stem Cell;SGI-1776;trt_cp;0.12 uM;24 h	478	5	4.20793	1.93715	0.122126	0.299524	SGI-1776	trt_cp	0.12 uM	24 h	Adipose-derived Stem Cell
Epithelial Cell;sonidegib;trt_cp;0.12 uM;24 h	4104	3	-9.08066	-5.00598	0.0370565	0.151875	sonidegib	trt_cp	0.12 uM	24 h	Epithelial Cell
Endothelial Cell;cabozantinib;trt_cp;0.12 uM;24 h	569	3	1.96655	0.944221	0.443195	0.626863	cabozantinib	trt_cp	0.12 uM	24 h	Endothelial Cell
Bone Marrow Stem Cell;GW-5074;trt_cp;0.12 uM;24 h	331	6	-2.71613	-1.22146	0.273582	0.47631	GW-5074	trt_cp	0.12 uM	24 h	Bone Marrow Stem Cell
Bone Marrow Stem Cell;everolimus;trt_cp;0.12 uM;24 h	331	4	-0.425113	-0.107149	0.921327	0.957319	everolimus	trt_cp	0.12 uM	24 h	Bone Marrow Stem Cell
Endothelial Cell;serdemetan;trt_cp;0.12 uM;24 h	569	4	-1.0698	-1.30662	0.273121	0.475935	serdemetan	trt_cp	0.12 uM	24 h	Endothelial Cell
Neural Progenitor Cell;doramapimod;trt_cp;0.12 uM;24 h	1286	7	-8.2555	-7.58058	0.000109731	0.00219984	doramapimod	trt_cp	0.12 uM	24 h	Neural Progenitor Cell
Bone Marrow Stem Cell;dasatinib;trt_cp;0.12 uM;24 h	331	15	5.41954	3.84288	0.00142017	0.0161921	dasatinib	trt_cp	0.12 uM	24 h	Bone Marrow Stem Cell
Neural Progenitor Cell;AT-7867;trt_cp;0.12 uM;24 h	1286	7	-8.75733	-7.81013	9.57219e-05	0.00196757	AT-7867	trt_cp	0.12 uM	24 h	Neural Progenitor Cell
HSC;GSK-1059615;trt_cp;0.12 uM;24 h	179	9	-5.91081	-4.24039	0.00216084	0.0224022	GSK-1059615	trt_cp	0.12 uM	24 h	HSC
Adipose-derived Stem Cell;BRD-K68336408;trt_cp;0.12 uM;24 h	478	5	3.36933	1.63127	0.175226	0.36799	BRD-K68336408	trt_cp	0.12 uM	24 h	Adipose-derived Stem Cell
Bone Marrow Stem Cell;PFI-1;trt_cp;0.12 uM;24 h	331	4	0.881076	0.296344	0.785751	0.877247	PFI-1	trt_cp	0.12 uM	24 h	Bone Marrow Stem Cell
Endothelial Cell;GNF-2;trt_cp;0.12 uM;24 h	569	4	-1.57321	-0.846289	0.458285	0.638986	GNF-2	trt_cp	0.12 uM	24 h	Endothelial Cell
Bone Marrow Stem Cell;olaparib;trt_cp;0.12 uM;24 h	331	7	0.407311	0.110793	0.915324	0.953894	olaparib	trt_cp	0.12 uM	24 h	Bone Marrow Stem Cell
Bone Marrow Stem Cell;GSK-J4;trt_cp;0.12 uM;24 h	331	4	2.49423	0.496213	0.653485	0.788531	GSK-J4	trt_cp	0.12 uM	24 h	Bone Marrow Stem Cell
Bone Marrow Stem Cell;anacardic-acid;trt_cp;0.12 uM;24 h	331	4	0.0767555	0.0158597	0.988331	0.994167	anacardic-acid	trt_cp	0.12 uM	24 h	Bone Marrow Stem Cell
Adipose-derived Stem Cell;C-646;trt_cp;0.12 uM;24 h	478	3	0.21578	0.0392932	0.972208	0.985065	C-646	trt_cp	0.12 uM	24 h	Adipose-derived Stem Cell
Neural Progenitor Cell;KIN-001-220;trt_cp;0.12 uM;24 h	1286	9	-5.09732	-3.14791	0.0123158	0.0765316	KIN-001-220	trt_cp	0.12 uM	24 h	Neural Progenitor Cell
Kidney Cell;GSK-429286A;trt_cp;0.12 uM;24 h	1114	3	-2.40509	-0.9786	0.430187	0.615836	GSK-429286A	trt_cp	0.12 uM	24 h	Kidney Cell
Embryonic Stem Cell;simvastatin;trt_cp;0.12 uM;24 h	107	3	8.31266	8.00998	1.47509e-08	1.16813e-06	simvastatin	trt_cp	0.12 uM	24 h	Embryonic Stem Cell
Embryonic Stem Cell;PI-103;trt_cp;0.12 uM;24 h	107	3	10.0012	9.97264	3.73957e-12	7.59286e-10	PI-103	trt_cp	0.12 uM	24 h	Embryonic Stem Cell
Embryonic Stem Cell;AMG-232;trt_cp;0.12 uM;24 h	107	3	25.8272	15.6272	9.8111e-05	0.00200293	AMG-232	trt_cp	0.12 uM	24 h	Embryonic Stem Cell
Epithelial Cell;equilin;trt_cp;0.12 uM;24 h	4104	6	26.2182	19.7202	5.42176e-06	0.000191613	equilin	trt_cp	0.12 uM	24 h	Epithelial Cell
Epithelial Cell;benzohydroxamic-acid;trt_cp;0.12 uM;24 h	4104	3	28.3614	18.5788	0.00273995	0.0267059	benzohydroxamic-acid	trt_cp	0.12 uM	24 h	Epithelial Cell
Endothelial Cell;SAR-245409;trt_cp;0.12 uM;24 h	569	3	-1.50536	-3.823	0.0231658	0.113974	SAR-245409	trt_cp	0.12 uM	24 h	Endothelial Cell
Bone Marrow Stem Cell;BAY-61-3606;trt_cp;0.12 uM;24 h	331	6	-1.22025	-0.615769	0.563243	0.720901	BAY-61-3606	trt_cp	0.12 uM	24 h	Bone Marrow Stem Cell
Bone Marrow Stem Cell;HMN-214;trt_cp;0.12 uM;24 h	331	6	-0.926172	-0.345399	0.743346	0.85	HMN-214	trt_cp	0.12 uM	24 h	Bone Marrow Stem Cell
Neural Progenitor Cell;HMN-214;trt_cp;0.12 uM;24 h	1286	8	-5.63326	-6.08648	0.000175259	0.00315331	HMN-214	trt_cp	0.12 uM	24 h	Neural Progenitor Cell
Bone Marrow Stem Cell;pyrazolanthrone;trt_cp;0.12 uM;24 h	331	6	-1.16557	-0.42374	0.688766	0.812298	pyrazolanthrone	trt_cp	0.12 uM	24 h	Bone Marrow Stem Cell
Bone Marrow Stem Cell;WZ-7043;trt_cp;0.12 uM;24 h	331	5	-4.03673	-1.42399	0.225278	0.424988	WZ-7043	trt_cp	0.12 uM	24 h	Bone Marrow Stem Cell
Bone Marrow Stem Cell;SAR-245409;trt_cp;0.12 uM;24 h	331	5	-2.03098	-0.815123	0.458899	0.63938	SAR-245409	trt_cp	0.12 uM	24 h	Bone Marrow Stem Cell
Bone Marrow Stem Cell;PF-573228;trt_cp;0.12 uM;24 h	331	6	1.77346	0.685804	0.522167	0.689443	PF-573228	trt_cp	0.12 uM	24 h	Bone Marrow Stem Cell
Neural Progenitor Cell;KIN001-055;trt_cp;0.12 uM;24 h	1286	9	-6.5987	-8.55818	2.12488e-06	8.9514e-05	KIN001-055	trt_cp	0.12 uM	24 h	Neural Progenitor Cell
Fibroblast;radicicol;trt_cp;0.12 uM;24 h	329	7	0.750362	0.316347	0.761419	0.861167	radicicol	trt_cp	0.12 uM	24 h	Fibroblast
Epithelial Cell;PD-0325901;trt_cp;0.12 uM;24 h	4104	10	-0.458548	-0.151685	0.882771	0.935176	PD-0325901	trt_cp	0.12 uM	24 h	Epithelial Cell
Epithelial Cell;AS-601245;trt_cp;0.12 uM;24 h	4104	3	2.8549	0.999765	0.422451	0.609638	AS-601245	trt_cp	0.12 uM	24 h	Epithelial Cell
Epithelial Cell;BRD-K11413513;trt_cp;0.12 uM;24 h	4104	3	-5.54616	-3.7089	0.0644508	0.208854	BRD-K11413513	trt_cp	0.12 uM	24 h	Epithelial Cell
Endothelial Cell;QL-XI-92;trt_cp;0.12 uM;24 h	569	4	-3.19777	-3.04121	0.0508546	0.181803	QL-XI-92	trt_cp	0.12 uM	24 h	Endothelial Cell
Neural Progenitor Cell;mocetinostat;trt_cp;0.12 uM;24 h	1286	9	-3.43798	-3.57655	0.00490425	0.0409223	mocetinostat	trt_cp	0.12 uM	24 h	Neural Progenitor Cell
Bone Marrow Stem Cell;BI-2536;trt_cp;0.12 uM;24 h	331	6	-1.04924	-0.320608	0.76116	0.861039	BI-2536	trt_cp	0.12 uM	24 h	Bone Marrow Stem Cell
Epithelial Cell;BRD-K15801082;trt_cp;0.12 uM;24 h	4104	3	0.813826	0.7896	0.510745	0.680558	BRD-K15801082	trt_cp	0.12 uM	24 h	Epithelial Cell
HSC;HMN-214;trt_cp;0.12 uM;24 h	179	3	-1.44701	-1.71742	0.189756	0.383791	HMN-214	trt_cp	0.12 uM	24 h	HSC
Adipose-derived Stem Cell;ischemin;trt_cp;0.12 uM;24 h	478	3	2.13993	1.24747	0.332038	0.531258	ischemin	trt_cp	0.12 uM	24 h	Adipose-derived Stem Cell
Neural Progenitor Cell;GSK-429286A;trt_cp;0.12 uM;24 h	1286	9	-8.81643	-9.02661	3.77085e-06	0.00014408	GSK-429286A	trt_cp	0.12 uM	24 h	Neural Progenitor Cell
Bone Marrow Stem Cell;KU-60019;trt_cp;0.12 uM;24 h	331	4	1.10731	0.276108	0.800114	0.886187	KU-60019	trt_cp	0.12 uM	24 h	Bone Marrow Stem Cell
Endothelial Cell;XMD-892;trt_cp;0.12 uM;24 h	569	3	1.71367	0.446323	0.698832	0.819437	XMD-892	trt_cp	0.12 uM	24 h	Endothelial Cell
Epithelial Cell;BRD-K54343811;trt_cp;0.12 uM;24 h	4104	3	25.2089	7.36464	0.0178327	0.0968474	BRD-K54343811	trt_cp	0.12 uM	24 h	Epithelial Cell
Adipose-derived Stem Cell;FR-180204;trt_cp;0.12 uM;24 h	478	5	4.14585	2.38369	0.0719521	0.222863	FR-180204	trt_cp	0.12 uM	24 h	Adipose-derived Stem Cell
Endothelial Cell;KIN001-270;trt_cp;0.12 uM;24 h	569	3	-2.14306	-5.29834	0.00919015	0.062968	KIN001-270	trt_cp	0.12 uM	24 h	Endothelial Cell
Neural Progenitor Cell;D-4476;trt_cp;0.12 uM;24 h	1286	9	-6.93634	-5.93938	0.000184641	0.00327982	D-4476	trt_cp	0.12 uM	24 h	Neural Progenitor Cell
Bone Marrow Stem Cell;AZD-7762;trt_cp;0.12 uM;24 h	331	6	1.34587	0.755116	0.481497	0.657439	AZD-7762	trt_cp	0.12 uM	24 h	Bone Marrow Stem Cell
Neural Progenitor Cell;JQ-1-R;trt_cp;0.12 uM;24 h	1286	9	-7.19879	-7.1197	3.33892e-05	0.000847422	JQ-1-R	trt_cp	0.12 uM	24 h	Neural Progenitor Cell
Adipose-derived Stem Cell;JQ-1-R;trt_cp;0.12 uM;24 h	478	4	0.240365	0.0701006	0.948463	0.972295	JQ-1-R	trt_cp	0.12 uM	24 h	Adipose-derived Stem Cell
Neural Progenitor Cell;PHA-767491;trt_cp;0.12 uM;24 h	1286	6	-7.92489	-7.42595	0.000291934	0.00464609	PHA-767491	trt_cp	0.12 uM	24 h	Neural Progenitor Cell
Neural Progenitor Cell;TAK-715;trt_cp;0.12 uM;24 h	1286	9	-7.92261	-7.64647	1.93379e-05	0.000541136	TAK-715	trt_cp	0.12 uM	24 h	Neural Progenitor Cell
Adipose-derived Stem Cell;WZ-7043;trt_cp;0.12 uM;24 h	478	5	2.03115	1.00042	0.371466	0.566025	WZ-7043	trt_cp	0.12 uM	24 h	Adipose-derived Stem Cell
Adipose-derived Stem Cell;NPK76-II-72-1;trt_cp;0.12 uM;24 h	478	3	1.88764	4.1603	0.00555047	0.044684	NPK76-II-72-1	trt_cp	0.12 uM	24 h	Adipose-derived Stem Cell
Neural Progenitor Cell;NVP-BGJ398;trt_cp;0.12 uM;24 h	1286	7	-7.10237	-5.27623	0.00128875	0.0150474	NVP-BGJ398	trt_cp	0.12 uM	24 h	Neural Progenitor Cell
Endothelial Cell;MLN-8054;trt_cp;0.12 uM;24 h	569	4	3.67071	2.2175	0.110789	0.284387	MLN-8054	trt_cp	0.12 uM	24 h	Endothelial Cell
Bone Marrow Stem Cell;iniparib;trt_cp;0.12 uM;24 h	331	4	3.63748	0.867023	0.448825	0.631113	iniparib	trt_cp	0.12 uM	24 h	Bone Marrow Stem Cell
Adipose-derived Stem Cell;MGCD-265;trt_cp;0.12 uM;24 h	478	4	2.915	4.34638	0.00866569	0.060587	MGCD-265	trt_cp	0.12 uM	24 h	Adipose-derived Stem Cell
Embryonic Stem Cell;KIN001-266;trt_cp;0.12 uM;24 h	107	3	-7.8631	-8.59217	8.64656e-14	2.71708e-11	KIN001-266	trt_cp	0.12 uM	24 h	Embryonic Stem Cell
Embryonic Stem Cell;amuvatinib;trt_cp;0.12 uM;24 h	107	3	-8.18796	-7.48284	8.66078e-07	4.17187e-05	amuvatinib	trt_cp	0.12 uM	24 h	Embryonic Stem Cell
Epithelial Cell;tomelukast;trt_cp;0.12 uM;24 h	4104	3	-1.62369	-0.706616	0.552719	0.713063	tomelukast	trt_cp	0.12 uM	24 h	Epithelial Cell
Embryonic Stem Cell;A-66;trt_cp;0.12 uM;24 h	107	3	-7.39706	-4.28534	0.0147945	0.0859789	A-66	trt_cp	0.12 uM	24 h	Embryonic Stem Cell
Embryonic Stem Cell;bosutinib;trt_cp;0.12 uM;24 h	107	3	-8.42874	-8.98921	5.19623e-14	1.85171e-11	bosutinib	trt_cp	0.12 uM	24 h	Embryonic Stem Cell
Kidney Cell;AZD-7762;trt_cp;0.12 uM;24 h	1114	3	-1.92647	-0.485426	0.6752	0.803636	AZD-7762	trt_cp	0.12 uM	24 h	Kidney Cell
Endothelial Cell;CX-5461;trt_cp;0.12 uM;24 h	569	5	-1.37596	-1.04574	0.352268	0.5495	CX-5461	trt_cp	0.12 uM	24 h	Endothelial Cell
Embryonic Stem Cell;idarubicin;trt_cp;0.12 uM;24 h	107	3	19.8365	8.49734	0.00473005	0.039833	idarubicin	trt_cp	0.12 uM	24 h	Embryonic Stem Cell
Epithelial Cell;tamoxifen;trt_cp;0.12 uM;24 h	4104	9	26.3715	22.3158	1.34106e-08	1.07141e-06	tamoxifen	trt_cp	0.12 uM	24 h	Epithelial Cell
Epithelial Cell;BRD-K61691971;trt_cp;0.12 uM;24 h	4104	3	26.3779	4.82701	0.0402694	0.159738	BRD-K61691971	trt_cp	0.12 uM	24 h	Epithelial Cell
Epithelial Cell;ML-167;trt_cp;0.12 uM;24 h	4104	3	-4.42122	-1.35742	0.307249	0.507643	ML-167	trt_cp	0.12 uM	24 h	Epithelial Cell
Epithelial Cell;D-4476;trt_cp;0.12 uM;24 h	4104	4	-3.51512	-0.954547	0.410104	0.59951	D-4476	trt_cp	0.12 uM	24 h	Epithelial Cell
Adipose-derived Stem Cell;PD-0325901;trt_cp;0.12 uM;24 h	478	11	4.73974	4.46339	0.000809216	0.0103781	PD-0325901	trt_cp	0.12 uM	24 h	Adipose-derived Stem Cell
Adipose-derived Stem Cell;SB-939;trt_cp;0.12 uM;24 h	478	3	1.51795	0.393774	0.731362	0.842235	SB-939	trt_cp	0.12 uM	24 h	Adipose-derived Stem Cell
Neural Progenitor Cell;pazopanib;trt_cp;0.12 uM;24 h	1286	6	-9.05201	-10.3702	2.22545e-05	0.00060482	pazopanib	trt_cp	0.12 uM	24 h	Neural Progenitor Cell
Bone Marrow Stem Cell;HG-14-10-04;trt_cp;0.12 uM;24 h	331	5	-1.07094	-0.517148	0.630724	0.77157	HG-14-10-04	trt_cp	0.12 uM	24 h	Bone Marrow Stem Cell
Neural Progenitor Cell;JNJ-38877605;trt_cp;0.12 uM;24 h	1286	9	-7.36307	-7.92907	1.02481e-05	0.000324474	JNJ-38877605	trt_cp	0.12 uM	24 h	Neural Progenitor Cell
Adipose-derived Stem Cell;HMN-214;trt_cp;0.12 uM;24 h	478	4	2.29302	1.15328	0.328978	0.528418	HMN-214	trt_cp	0.12 uM	24 h	Adipose-derived Stem Cell
Adipose-derived Stem Cell;HG-14-10-04;trt_cp;0.12 uM;24 h	478	4	4.45422	2.75769	0.0650256	0.209877	HG-14-10-04	trt_cp	0.12 uM	24 h	Adipose-derived Stem Cell
Neural Progenitor Cell;HG-14-10-04;trt_cp;0.12 uM;24 h	1286	7	-8.79073	-6.45192	0.000409519	0.00603191	HG-14-10-04	trt_cp	0.12 uM	24 h	Neural Progenitor Cell
HSC;KIN001-242;trt_cp;0.12 uM;24 h	179	3	-2.03277	-0.810546	0.500093	0.672006	KIN001-242	trt_cp	0.12 uM	24 h	HSC
Bone Marrow Stem Cell;GSK-1059615;trt_cp;0.12 uM;24 h	331	21	1.60086	1.03658	0.310955	0.511468	GSK-1059615	trt_cp	0.12 uM	24 h	Bone Marrow Stem Cell
Bone Marrow Stem Cell;BRD-K09991945;trt_cp;0.12 uM;24 h	331	4	-2.64117	-1.26834	0.289179	0.491291	BRD-K09991945	trt_cp	0.12 uM	24 h	Bone Marrow Stem Cell
Bone Marrow Stem Cell;XMD-885;trt_cp;0.12 uM;24 h	331	5	-2.67249	-0.996514	0.37344	0.567416	XMD-885	trt_cp	0.12 uM	24 h	Bone Marrow Stem Cell
Adipose-derived Stem Cell;KIN001-127;trt_cp;0.12 uM;24 h	478	4	-0.505622	-0.334708	0.758306	0.859119	KIN001-127	trt_cp	0.12 uM	24 h	Adipose-derived Stem Cell
Adipose-derived Stem Cell;EX-527;trt_cp;0.12 uM;24 h	478	3	6.53941	5.25668	0.0265194	0.123782	EX-527	trt_cp	0.12 uM	24 h	Adipose-derived Stem Cell
Adipose-derived Stem Cell;CGP-60474;trt_cp;0.12 uM;24 h	478	10	7.82515	4.51391	0.00125398	0.0147153	CGP-60474	trt_cp	0.12 uM	24 h	Adipose-derived Stem Cell
Adipose-derived Stem Cell;NVP-BGJ398;trt_cp;0.12 uM;24 h	478	4	3.28858	3.11533	0.0420701	0.16345	NVP-BGJ398	trt_cp	0.12 uM	24 h	Adipose-derived Stem Cell
Adipose-derived Stem Cell;dasatinib;trt_cp;0.12 uM;24 h	478	11	3.91116	3.75467	0.00280028	0.0270825	dasatinib	trt_cp	0.12 uM	24 h	Adipose-derived Stem Cell
Neural Progenitor Cell;anacardic-acid;trt_cp;0.12 uM;24 h	1286	9	-5.27014	-3.4551	0.0075003	0.0549478	anacardic-acid	trt_cp	0.12 uM	24 h	Neural Progenitor Cell
Adipose-derived Stem Cell;PHA-767491;trt_cp;0.12 uM;24 h	478	6	2.8256	5.21877	0.000355906	0.0054284	PHA-767491	trt_cp	0.12 uM	24 h	Adipose-derived Stem Cell
Bone Marrow Stem Cell;KIN001-242;trt_cp;0.12 uM;24 h	331	6	-0.5621	-0.184779	0.86046	0.922199	KIN001-242	trt_cp	0.12 uM	24 h	Bone Marrow Stem Cell
Endothelial Cell;KIN001-127;trt_cp;0.12 uM;24 h	569	4	-0.253465	-0.366847	0.734504	0.844494	KIN001-127	trt_cp	0.12 uM	24 h	Endothelial Cell
Adipose-derived Stem Cell;ibrutinib;trt_cp;0.12 uM;24 h	478	5	0.261668	0.102019	0.923526	0.958719	ibrutinib	trt_cp	0.12 uM	24 h	Adipose-derived Stem Cell
Adipose-derived Stem Cell;RG-108;trt_cp;0.12 uM;24 h	478	4	0.707742	0.512879	0.640404	0.778739	RG-108	trt_cp	0.12 uM	24 h	Adipose-derived Stem Cell
Adipose-derived Stem Cell;PFI-1;trt_cp;0.12 uM;24 h	478	4	1.48914	0.716093	0.523704	0.690553	PFI-1	trt_cp	0.12 uM	24 h	Adipose-derived Stem Cell
Neural Progenitor Cell;serdemetan;trt_cp;0.12 uM;24 h	1286	9	-7.87943	-8.4783	5.5918e-06	0.000195478	serdemetan	trt_cp	0.12 uM	24 h	Neural Progenitor Cell
Neural Progenitor Cell;BGT-226;trt_cp;0.12 uM;24 h	1286	5	-6.11233	-2.53657	0.0620253	0.204504	BGT-226	trt_cp	0.12 uM	24 h	Neural Progenitor Cell
Neural Progenitor Cell;daminozide;trt_cp;0.12 uM;24 h	1286	9	-8.20123	-9.41575	1.58295e-06	6.9624e-05	daminozide	trt_cp	0.12 uM	24 h	Neural Progenitor Cell
Kidney Cell;CG-930;trt_cp;0.12 uM;24 h	1114	3	-3.85475	-1.78841	0.214151	0.412123	CG-930	trt_cp	0.12 uM	24 h	Kidney Cell
Endothelial Cell;BRD-K29983336;trt_cp;0.12 uM;24 h	569	3	0.522181	0.604055	0.601672	0.7494	BRD-K29983336	trt_cp	0.12 uM	24 h	Endothelial Cell
Embryonic Stem Cell;nocodazole;trt_cp;0.12 uM;24 h	107	3	9.91787	7.75319	7.33319e-05	0.0015892	nocodazole	trt_cp	0.12 uM	24 h	Embryonic Stem Cell
Embryonic Stem Cell;BRD-K63750851;trt_cp;0.12 uM;24 h	107	3	10.809	3.02152	0.0804095	0.237234	BRD-K63750851	trt_cp	0.12 uM	24 h	Embryonic Stem Cell
Embryonic Stem Cell;RITA;trt_cp;0.12 uM;24 h	107	3	12.6526	8.91048	0.000183664	0.00326583	RITA	trt_cp	0.12 uM	24 h	Embryonic Stem Cell
Epithelial Cell;BRD-K57064803;trt_cp;0.12 uM;24 h	4104	3	28.0847	7.68438	0.0164252	0.0921028	BRD-K57064803	trt_cp	0.12 uM	24 h	Epithelial Cell
Epithelial Cell;alpha-estradiol;trt_cp;0.12 uM;24 h	4104	3	26.2326	12.9939	0.00572698	0.0456057	alpha-estradiol	trt_cp	0.12 uM	24 h	Epithelial Cell
Bone Marrow Stem Cell;belinostat;trt_cp;0.12 uM;24 h	331	4	3.06603	0.717207	0.524344	0.691032	belinostat	trt_cp	0.12 uM	24 h	Bone Marrow Stem Cell
Adipose-derived Stem Cell;decitabine;trt_cp;0.12 uM;24 h	478	3	5.46724	3.2856	0.074592	0.227152	decitabine	trt_cp	0.12 uM	24 h	Adipose-derived Stem Cell
Bone Marrow Stem Cell;SGI-1776;trt_cp;0.12 uM;24 h	331	5	-3.58625	-1.54358	0.194083	0.388979	SGI-1776	trt_cp	0.12 uM	24 h	Bone Marrow Stem Cell
Neural Progenitor Cell;ABT-737;trt_cp;0.12 uM;24 h	1286	9	-7.79347	-7.08984	4.14211e-05	0.00100246	ABT-737	trt_cp	0.12 uM	24 h	Neural Progenitor Cell
Neural Progenitor Cell;AZD-7762;trt_cp;0.12 uM;24 h	1286	8	-7.6126	-7.63328	3.76903e-05	0.000932855	AZD-7762	trt_cp	0.12 uM	24 h	Neural Progenitor Cell
Epithelial Cell;buparlisib;trt_cp;0.12 uM;24 h	4104	3	5.2334	1.40068	0.296085	0.497353	buparlisib	trt_cp	0.12 uM	24 h	Epithelial Cell
Bone Marrow Stem Cell;cabozantinib;trt_cp;0.12 uM;24 h	331	5	-1.57315	-0.894175	0.41771	0.605947	cabozantinib	trt_cp	0.12 uM	24 h	Bone Marrow Stem Cell
Neural Progenitor Cell;NU-7026;trt_cp;0.12 uM;24 h	1286	9	-10.1014	-7.56619	3.38304e-05	0.000857373	NU-7026	trt_cp	0.12 uM	24 h	Neural Progenitor Cell
Bone Marrow Stem Cell;A-769662;trt_cp;0.12 uM;24 h	331	6	0.197183	0.0641858	0.951241	0.973853	A-769662	trt_cp	0.12 uM	24 h	Bone Marrow Stem Cell
Adipose-derived Stem Cell;GSK-2334470;trt_cp;0.12 uM;24 h	478	4	0.953388	1.13721	0.31996	0.520111	GSK-2334470	trt_cp	0.12 uM	24 h	Adipose-derived Stem Cell
Adipose-derived Stem Cell;methylstat;trt_cp;0.12 uM;24 h	478	3	-0.164434	-0.150155	0.892641	0.940679	methylstat	trt_cp	0.12 uM	24 h	Adipose-derived Stem Cell
Epithelial Cell;tozasertib;trt_cp;0.12 uM;24 h	4104	8	11.132	2.06834	0.0773703	0.232211	tozasertib	trt_cp	0.12 uM	24 h	Epithelial Cell
Epithelial Cell;GW-843682X;trt_cp;0.12 uM;24 h	4104	3	9.4189	7.13808	0.018306	0.098445	GW-843682X	trt_cp	0.12 uM	24 h	Epithelial Cell
Adipose-derived Stem Cell;AZD-1480;trt_cp;0.12 uM;24 h	478	4	0.970378	1.05163	0.356099	0.55355	AZD-1480	trt_cp	0.12 uM	24 h	Adipose-derived Stem Cell
Bone Marrow Stem Cell;chelerythrine;trt_cp;0.12 uM;24 h	331	6	-2.24704	-0.803475	0.456987	0.637864	chelerythrine	trt_cp	0.12 uM	24 h	Bone Marrow Stem Cell
Neural Progenitor Cell;C-646;trt_cp;0.12 uM;24 h	1286	9	-8.77852	-7.08795	5.0918e-05	0.00118232	C-646	trt_cp	0.12 uM	24 h	Neural Progenitor Cell
Endothelial Cell;SB-939;trt_cp;0.12 uM;24 h	569	5	-0.0620794	-0.0544275	0.959058	0.977815	SB-939	trt_cp	0.12 uM	24 h	Endothelial Cell
Neural Progenitor Cell;PFI-1;trt_cp;0.12 uM;24 h	1286	9	-6.31105	-6.06758	0.000130953	0.00251833	PFI-1	trt_cp	0.12 uM	24 h	Neural Progenitor Cell
Bone Marrow Stem Cell;azacitidine;trt_cp;0.12 uM;24 h	331	4	2.61413	0.523867	0.636246	0.775762	azacitidine	trt_cp	0.12 uM	24 h	Bone Marrow Stem Cell
Bone Marrow Stem Cell;amuvatinib;trt_cp;0.12 uM;24 h	331	5	-5.42148	-1.67505	0.1674	0.358095	amuvatinib	trt_cp	0.12 uM	24 h	Bone Marrow Stem Cell
Bone Marrow Stem Cell;JWE-035;trt_cp;0.12 uM;24 h	331	6	1.04331	0.467221	0.658983	0.792563	JWE-035	trt_cp	0.12 uM	24 h	Bone Marrow Stem Cell
Adipose-derived Stem Cell;GSK-1059615;trt_cp;0.12 uM;24 h	478	15	3.50565	3.95185	0.000953447	0.0118117	GSK-1059615	trt_cp	0.12 uM	24 h	Adipose-derived Stem Cell
Adipose-derived Stem Cell;sunitinib;trt_cp;0.12 uM;24 h	478	5	3.67625	3.3799	0.0218191	0.109923	sunitinib	trt_cp	0.12 uM	24 h	Adipose-derived Stem Cell
Bone Marrow Stem Cell;ALW-II-49-7;trt_cp;0.12 uM;24 h	331	5	-3.55496	-1.54192	0.194418	0.38945	ALW-II-49-7	trt_cp	0.12 uM	24 h	Bone Marrow Stem Cell
Bone Marrow Stem Cell;garcinol;trt_cp;0.12 uM;24 h	331	4	1.77718	0.377153	0.730876	0.842185	garcinol	trt_cp	0.12 uM	24 h	Bone Marrow Stem Cell
Kidney Cell;PF-573228;trt_cp;0.12 uM;24 h	1114	3	-3.69422	-5.71463	0.0214041	0.108714	PF-573228	trt_cp	0.12 uM	24 h	Kidney Cell
Kidney Cell;dabrafenib;trt_cp;0.12 uM;24 h	1114	3	-5.47805	-3.29106	0.0791232	0.234917	dabrafenib	trt_cp	0.12 uM	24 h	Kidney Cell
Kidney Cell;GW-5074;trt_cp;0.12 uM;24 h	1114	3	-3.87794	-2.74221	0.108014	0.280667	GW-5074	trt_cp	0.12 uM	24 h	Kidney Cell
Kidney Cell;GSK-2334470;trt_cp;0.12 uM;24 h	1114	3	0.0827762	0.0722347	0.948751	0.972502	GSK-2334470	trt_cp	0.12 uM	24 h	Kidney Cell
Embryonic Stem Cell;levosulpiride;trt_cp;0.12 uM;24 h	107	3	11.4177	7.24592	0.00138669	0.0159039	levosulpiride	trt_cp	0.12 uM	24 h	Embryonic Stem Cell
Embryonic Stem Cell;nutlin-3;trt_cp;0.12 uM;24 h	107	3	9.58629	3.86912	0.0381016	0.154157	nutlin-3	trt_cp	0.12 uM	24 h	Embryonic Stem Cell
Epithelial Cell;BRD-K45330754;trt_cp;0.12 uM;24 h	4104	9	25.1144	22.7755	1.09609e-08	8.98558e-07	BRD-K45330754	trt_cp	0.12 uM	24 h	Epithelial Cell
Endothelial Cell;resveratrol;trt_cp;0.12 uM;24 h	569	5	-4.33644	-4.37992	0.00990514	0.0661789	resveratrol	trt_cp	0.12 uM	24 h	Endothelial Cell
Bone Marrow Stem Cell;JNK-IN-5A;trt_cp;0.12 uM;24 h	331	6	-0.195316	-0.087844	0.933233	0.964011	JNK-IN-5A	trt_cp	0.12 uM	24 h	Bone Marrow Stem Cell
Neural Progenitor Cell;decitabine;trt_cp;0.12 uM;24 h	1286	9	-5.49298	-5.48483	0.00026989	0.00436359	decitabine	trt_cp	0.12 uM	24 h	Neural Progenitor Cell
Bone Marrow Stem Cell;CG-930;trt_cp;0.12 uM;24 h	331	6	-0.296193	-0.120349	0.908694	0.950198	CG-930	trt_cp	0.12 uM	24 h	Bone Marrow Stem Cell
Adipose-derived Stem Cell;BIX-01294;trt_cp;0.12 uM;24 h	478	4	0.855355	0.36059	0.741603	0.849119	BIX-01294	trt_cp	0.12 uM	24 h	Adipose-derived Stem Cell
Epithelial Cell;THZ-2-98-01;trt_cp;0.12 uM;24 h	4104	3	4.09898	3.05356	0.0909433	0.254257	THZ-2-98-01	trt_cp	0.12 uM	24 h	Epithelial Cell
Epithelial Cell;QL-X-138;trt_cp;0.12 uM;24 h	4104	3	4.53591	2.76286	0.108679	0.28137	QL-X-138	trt_cp	0.12 uM	24 h	Epithelial Cell
Epithelial Cell;SU-11274;trt_cp;0.12 uM;24 h	4104	3	4.43317	1.46085	0.281183	0.483899	SU-11274	trt_cp	0.12 uM	24 h	Epithelial Cell
Bone Marrow Stem Cell;doramapimod;trt_cp;0.12 uM;24 h	331	5	-0.911098	-0.356654	0.738665	0.847104	doramapimod	trt_cp	0.12 uM	24 h	Bone Marrow Stem Cell
Adipose-derived Stem Cell;XMD-885;trt_cp;0.12 uM;24 h	478	5	6.76497	10.9854	1.38073e-05	0.000413545	XMD-885	trt_cp	0.12 uM	24 h	Adipose-derived Stem Cell
Neural Progenitor Cell;BMS-509744;trt_cp;0.12 uM;24 h	1286	6	-7.32822	-5.94923	0.00116155	0.0138636	BMS-509744	trt_cp	0.12 uM	24 h	Neural Progenitor Cell
Epithelial Cell;BRD-K35832492;trt_cp;0.12 uM;24 h	4104	3	18.4468	19.8952	0.00217648	0.0225145	BRD-K35832492	trt_cp	0.12 uM	24 h	Epithelial Cell
Epithelial Cell;PI-103;trt_cp;0.12 uM;24 h	4104	3	2.39024	1.4341	0.286877	0.489165	PI-103	trt_cp	0.12 uM	24 h	Epithelial Cell
HSC;pyrazolanthrone;trt_cp;0.12 uM;24 h	179	3	-2.45697	-0.843124	0.485878	0.66105	pyrazolanthrone	trt_cp	0.12 uM	24 h	HSC
Bone Marrow Stem Cell;ALW-II-38-3;trt_cp;0.12 uM;24 h	331	5	-2.09214	-0.628086	0.563244	0.720901	ALW-II-38-3	trt_cp	0.12 uM	24 h	Bone Marrow Stem Cell
Endothelial Cell;rigosertib;trt_cp;0.12 uM;24 h	569	3	3.63005	2.01206	0.178836	0.372088	rigosertib	trt_cp	0.12 uM	24 h	Endothelial Cell
Adipose-derived Stem Cell;dabrafenib;trt_cp;0.12 uM;24 h	478	4	0.89246	0.469525	0.669265	0.799642	dabrafenib	trt_cp	0.12 uM	24 h	Adipose-derived Stem Cell
Adipose-derived Stem Cell;CC-401;trt_cp;0.12 uM;24 h	478	4	3.14227	2.89753	0.0517716	0.183514	CC-401	trt_cp	0.12 uM	24 h	Adipose-derived Stem Cell
Neural Progenitor Cell;GSK-1070916;trt_cp;0.12 uM;24 h	1286	9	-3.55983	-2.62106	0.0277823	0.127529	GSK-1070916	trt_cp	0.12 uM	24 h	Neural Progenitor Cell
Bone Marrow Stem Cell;VE-821;trt_cp;0.12 uM;24 h	331	4	4.05767	0.856068	0.454202	0.635628	VE-821	trt_cp	0.12 uM	24 h	Bone Marrow Stem Cell
Bone Marrow Stem Cell;CGP-60474;trt_cp;0.12 uM;24 h	331	6	16.6995	9.85582	0.000105355	0.00212554	CGP-60474	trt_cp	0.12 uM	24 h	Bone Marrow Stem Cell
Endothelial Cell;D-4476;trt_cp;0.12 uM;24 h	569	4	-2.20292	-1.71044	0.181459	0.375041	D-4476	trt_cp	0.12 uM	24 h	Endothelial Cell
Neural Progenitor Cell;KIN001-270;trt_cp;0.12 uM;24 h	1286	7	-7.15508	-6.40522	0.00033464	0.00517565	KIN001-270	trt_cp	0.12 uM	24 h	Neural Progenitor Cell
Adipose-derived Stem Cell;SB-216763;trt_cp;0.12 uM;24 h	478	6	3.63865	2.25247	0.0704856	0.220176	SB-216763	trt_cp	0.12 uM	24 h	Adipose-derived Stem Cell
Adipose-derived Stem Cell;vorinostat;trt_cp;0.12 uM;24 h	478	3	-0.501569	-0.428004	0.705642	0.823937	vorinostat	trt_cp	0.12 uM	24 h	Adipose-derived Stem Cell
Adipose-derived Stem Cell;SAR-245409;trt_cp;0.12 uM;24 h	478	5	5.8284	2.25478	0.0854125	0.245564	SAR-245409	trt_cp	0.12 uM	24 h	Adipose-derived Stem Cell
Kidney Cell;GSK-1059615;trt_cp;0.12 uM;24 h	1114	10	0.761154	0.609712	0.556624	0.715891	GSK-1059615	trt_cp	0.12 uM	24 h	Kidney Cell
Endothelial Cell;MGCD-265;trt_cp;0.12 uM;24 h	569	4	-1.79715	-0.873552	0.445584	0.629114	MGCD-265	trt_cp	0.12 uM	24 h	Endothelial Cell
Kidney Cell;alectinib;trt_cp;0.12 uM;24 h	1114	3	-1.82528	-0.721848	0.544825	0.707031	alectinib	trt_cp	0.12 uM	24 h	Kidney Cell
Endothelial Cell;KIN001-269;trt_cp;0.12 uM;24 h	569	4	1.52684	1.28766	0.283741	0.486157	KIN001-269	trt_cp	0.12 uM	24 h	Endothelial Cell
Epithelial Cell;raloxifene;trt_cp;0.12 uM;24 h	4104	15	25.0186	17.3867	5.83077e-11	8.5919e-09	raloxifene	trt_cp	0.12 uM	24 h	Epithelial Cell
Epithelial Cell;AVA;trt_cp;0.12 uM;24 h	4104	3	19.2042	7.45444	0.0173334	0.0952532	AVA	trt_cp	0.12 uM	24 h	Epithelial Cell
Epithelial Cell;estrone;trt_cp;0.12 uM;24 h	4104	6	27.8207	18.5771	7.51824e-06	0.000252218	estrone	trt_cp	0.12 uM	24 h	Epithelial Cell
Epithelial Cell;dasatinib;trt_cp;0.12 uM;24 h	4104	9	3.16185	0.904514	0.392092	0.5839	dasatinib	trt_cp	0.12 uM	24 h	Epithelial Cell
Endothelial Cell;SB-525334;trt_cp;0.12 uM;24 h	569	3	2.29924	2.49824	0.118584	0.29486	SB-525334	trt_cp	0.12 uM	24 h	Endothelial Cell
Neural Progenitor Cell;UNC-1215;trt_cp;0.12 uM;24 h	1286	9	-6.26539	-6.79043	3.95165e-05	0.000968444	UNC-1215	trt_cp	0.12 uM	24 h	Neural Progenitor Cell
Neural Progenitor Cell;SB-203580;trt_cp;0.12 uM;24 h	1286	8	-6.55296	-8.11479	1.08262e-05	0.000337573	SB-203580	trt_cp	0.12 uM	24 h	Neural Progenitor Cell
HSC;AZ-20;trt_cp;0.12 uM;24 h	179	3	-4.83498	-5.01892	0.0213509	0.108567	AZ-20	trt_cp	0.12 uM	24 h	HSC
Adipose-derived Stem Cell;BMS-777607;trt_cp;0.12 uM;24 h	478	6	2.94943	1.72026	0.14251	0.327512	BMS-777607	trt_cp	0.12 uM	24 h	Adipose-derived Stem Cell
Endothelial Cell;SB-216763;trt_cp;0.12 uM;24 h	569	3	-1.65585	-3.12579	0.0603032	0.200913	SB-216763	trt_cp	0.12 uM	24 h	Endothelial Cell
Epithelial Cell;GDC-0941;trt_cp;0.12 uM;24 h	4104	3	1.96894	1.00778	0.419046	0.606854	GDC-0941	trt_cp	0.12 uM	24 h	Epithelial Cell
Bone Marrow Stem Cell;WZ-4002;trt_cp;0.12 uM;24 h	331	5	1.3965	0.733145	0.501312	0.672967	WZ-4002	trt_cp	0.12 uM	24 h	Bone Marrow Stem Cell
Epithelial Cell;5-iodotubercidin;trt_cp;0.12 uM;24 h	4104	3	-9.28321	-8.41922	0.012942	0.0788921	5-iodotubercidin	trt_cp	0.12 uM	24 h	Epithelial Cell
Neural Progenitor Cell;BAY-61-3606;trt_cp;0.12 uM;24 h	1286	9	-7.54568	-6.54081	8.60905e-05	0.00180248	BAY-61-3606	trt_cp	0.12 uM	24 h	Neural Progenitor Cell
Bone Marrow Stem Cell;NVP-TAE226;trt_cp;0.12 uM;24 h	331	5	-0.165615	-0.0823507	0.938076	0.966555	NVP-TAE226	trt_cp	0.12 uM	24 h	Bone Marrow Stem Cell
Endothelial Cell;PHA-767491;trt_cp;0.12 uM;24 h	569	3	1.8584	0.970245	0.43242	0.617732	PHA-767491	trt_cp	0.12 uM	24 h	Endothelial Cell
Adipose-derived Stem Cell;ponatinib;trt_cp;0.12 uM;24 h	478	4	1.6332	0.969467	0.399798	0.59109	ponatinib	trt_cp	0.12 uM	24 h	Adipose-derived Stem Cell
HSC;SGX-523;trt_cp;0.12 uM;24 h	179	3	0.107114	0.0628691	0.955196	0.975789	SGX-523	trt_cp	0.12 uM	24 h	HSC
Epithelial Cell;BMS-387032;trt_cp;0.12 uM;24 h	4104	3	15.6385	25.4896	0.00105407	0.0128084	BMS-387032	trt_cp	0.12 uM	24 h	Epithelial Cell
Epithelial Cell;GSK-1904529A;trt_cp;0.12 uM;24 h	4104	3	2.50028	1.11562	0.380138	0.57279	GSK-1904529A	trt_cp	0.12 uM	24 h	Epithelial Cell
Epithelial Cell;BAS-00535043;trt_cp;0.12 uM;24 h	4104	3	-8.17386	-2.95038	0.0978468	0.264796	BAS-00535043	trt_cp	0.12 uM	24 h	Epithelial Cell
Bone Marrow Stem Cell;quizartinib;trt_cp;0.12 uM;24 h	331	5	-3.10061	-1.52486	0.197462	0.392325	quizartinib	trt_cp	0.12 uM	24 h	Bone Marrow Stem Cell
Adipose-derived Stem Cell;SB-203580;trt_cp;0.12 uM;24 h	478	4	0.225642	0.109817	0.919219	0.955903	SB-203580	trt_cp	0.12 uM	24 h	Adipose-derived Stem Cell
Neural Progenitor Cell;KIN001-127;trt_cp;0.12 uM;24 h	1286	9	-6.20918	-3.29527	0.0100651	0.0668701	KIN001-127	trt_cp	0.12 uM	24 h	Neural Progenitor Cell
HSC;olaparib;trt_cp;0.12 uM;24 h	179	5	3.00685	1.68732	0.161775	0.351655	olaparib	trt_cp	0.12 uM	24 h	HSC
Neural Progenitor Cell;HG-9-91-01;trt_cp;0.12 uM;24 h	1286	6	-7.11491	-7.48974	0.000215265	0.00368581	HG-9-91-01	trt_cp	0.12 uM	24 h	Neural Progenitor Cell
HSC;I-BET-151;trt_cp;0.12 uM;24 h	179	3	1.34761	0.381479	0.738973	0.847303	I-BET-151	trt_cp	0.12 uM	24 h	HSC
Kidney Cell;serdemetan;trt_cp;0.12 uM;24 h	1114	3	-2.98464	-1.38395	0.299256	0.500132	serdemetan	trt_cp	0.12 uM	24 h	Kidney Cell
Endothelial Cell;C-646;trt_cp;0.12 uM;24 h	569	5	-2.8334	-1.86145	0.133788	0.315779	C-646	trt_cp	0.12 uM	24 h	Endothelial Cell
Kidney Cell;HMN-214;trt_cp;0.12 uM;24 h	1114	3	-0.683341	-0.796318	0.5041	0.675385	HMN-214	trt_cp	0.12 uM	24 h	Kidney Cell
Kidney Cell;KIN001-269;trt_cp;0.12 uM;24 h	1114	3	-1.23397	-0.515776	0.656942	0.790898	KIN001-269	trt_cp	0.12 uM	24 h	Kidney Cell
Embryonic Stem Cell;nelfinavir;trt_cp;0.12 uM;24 h	107	3	11.0415	6.44217	0.00362954	0.0327277	nelfinavir	trt_cp	0.12 uM	24 h	Embryonic Stem Cell
Embryonic Stem Cell;fludarabine;trt_cp;0.12 uM;24 h	107	3	8.21039	4.36275	0.0177997	0.0967502	fludarabine	trt_cp	0.12 uM	24 h	Embryonic Stem Cell
Fibroblast;withaferin-a;trt_cp;0.12 uM;24 h	329	12	5.57991	1.73082	0.109891	0.283061	withaferin-a	trt_cp	0.12 uM	24 h	Fibroblast
Epithelial Cell;BRD-K33269038;trt_cp;0.12 uM;24 h	4104	3	4.35252	7.00114	0.0164368	0.0921239	BRD-K33269038	trt_cp	0.12 uM	24 h	Epithelial Cell
Neural Progenitor Cell;GW-5074;trt_cp;0.12 uM;24 h	1286	9	-6.75478	-7.49019	1.55121e-05	0.000454469	GW-5074	trt_cp	0.12 uM	24 h	Neural Progenitor Cell
Endothelial Cell;KIN001-055;trt_cp;0.12 uM;24 h	569	4	-0.8783	-0.802604	0.477455	0.654043	KIN001-055	trt_cp	0.12 uM	24 h	Endothelial Cell
Adipose-derived Stem Cell;olaparib;trt_cp;0.12 uM;24 h	478	7	3.12271	1.69717	0.138014	0.321576	olaparib	trt_cp	0.12 uM	24 h	Adipose-derived Stem Cell
Endothelial Cell;BRD-A92800748;trt_cp;0.12 uM;24 h	569	4	-3.61738	-3.13296	0.047939	0.17597	BRD-A92800748	trt_cp	0.12 uM	24 h	Endothelial Cell
Adipose-derived Stem Cell;KU-55933;trt_cp;0.12 uM;24 h	478	3	-1.25176	-0.307828	0.787036	0.878248	KU-55933	trt_cp	0.12 uM	24 h	Adipose-derived Stem Cell
Neural Progenitor Cell;BRD-K29983336;trt_cp;0.12 uM;24 h	1286	9	-8.02993	-7.18185	3.85217e-05	0.000949396	BRD-K29983336	trt_cp	0.12 uM	24 h	Neural Progenitor Cell
Endothelial Cell;AZ-20;trt_cp;0.12 uM;24 h	569	4	-5.74902	-5.69168	0.00867765	0.0606341	AZ-20	trt_cp	0.12 uM	24 h	Endothelial Cell
Epithelial Cell;CHIR-99021;trt_cp;0.12 uM;24 h	4104	3	3.61647	3.05002	0.0906658	0.253882	CHIR-99021	trt_cp	0.12 uM	24 h	Epithelial Cell
Epithelial Cell;vismodegib;trt_cp;0.12 uM;24 h	4104	3	-6.68201	-3.97586	0.0569508	0.194152	vismodegib	trt_cp	0.12 uM	24 h	Epithelial Cell
Bone Marrow Stem Cell;ibrutinib;trt_cp;0.12 uM;24 h	331	4	3.87419	1.42473	0.246315	0.447278	ibrutinib	trt_cp	0.12 uM	24 h	Bone Marrow Stem Cell
Bone Marrow Stem Cell;GDC-0879;trt_cp;0.12 uM;24 h	331	6	-2.36805	-1.03707	0.344924	0.542858	GDC-0879	trt_cp	0.12 uM	24 h	Bone Marrow Stem Cell
HSC;NPK76-II-72-1;trt_cp;0.12 uM;24 h	179	3	1.99535	0.890878	0.463352	0.643062	NPK76-II-72-1	trt_cp	0.12 uM	24 h	HSC
Neural Progenitor Cell;everolimus;trt_cp;0.12 uM;6 h	73	3	-9.29531	-4.85699	0.00028343	0.00453215	everolimus	trt_cp	0.12 uM	6 h	Neural Progenitor Cell
Adipose-derived Stem Cell;alectinib;trt_cp;0.12 uM;24 h	478	4	1.32222	0.980246	0.392945	0.584597	alectinib	trt_cp	0.12 uM	24 h	Adipose-derived Stem Cell
HSC;KU-55933;trt_cp;0.12 uM;24 h	179	3	-2.08131	-1.01426	0.412309	0.601723	KU-55933	trt_cp	0.12 uM	24 h	HSC
Neural Progenitor Cell;tivozanib;trt_cp;0.12 uM;24 h	1286	7	-7.27844	-6.20129	0.000437656	0.00634993	tivozanib	trt_cp	0.12 uM	24 h	Neural Progenitor Cell
Neural Progenitor Cell;AZD-1480;trt_cp;0.12 uM;24 h	1286	8	-8.61473	-10.6902	8.96551e-07	4.29236e-05	AZD-1480	trt_cp	0.12 uM	24 h	Neural Progenitor Cell
Neural Progenitor Cell;PF-04217903;trt_cp;0.12 uM;24 h	1286	7	-6.209	-7.51799	5.34785e-05	0.00123439	PF-04217903	trt_cp	0.12 uM	24 h	Neural Progenitor Cell
Neural Progenitor Cell;VE-821;trt_cp;0.12 uM;24 h	1286	9	-7.43242	-5.8222	0.000238143	0.00396787	VE-821	trt_cp	0.12 uM	24 h	Neural Progenitor Cell
HSC;CC-401;trt_cp;0.12 uM;24 h	179	3	0.254758	0.254488	0.818269	0.896828	CC-401	trt_cp	0.12 uM	24 h	HSC
Adipose-derived Stem Cell;quizartinib;trt_cp;0.12 uM;24 h	478	5	4.75832	2.12448	0.0984056	0.265684	quizartinib	trt_cp	0.12 uM	24 h	Adipose-derived Stem Cell
HSC;A-769662;trt_cp;0.12 uM;24 h	179	3	-3.60782	-1.64707	0.235495	0.435814	A-769662	trt_cp	0.12 uM	24 h	HSC
Kidney Cell;D-4476;trt_cp;0.12 uM;24 h	1114	3	-0.1216	-0.0862194	0.938959	0.966827	D-4476	trt_cp	0.12 uM	24 h	Kidney Cell
Kidney Cell;chelerythrine;trt_cp;0.12 uM;24 h	1114	3	1.41795	0.552174	0.635896	0.775618	chelerythrine	trt_cp	0.12 uM	24 h	Kidney Cell
Embryonic Stem Cell;dabrafenib;trt_cp;0.12 uM;24 h	107	3	7.49627	4.58962	0.00965495	0.0650298	dabrafenib	trt_cp	0.12 uM	24 h	Embryonic Stem Cell
Embryonic Stem Cell;procaterol;trt_cp;0.12 uM;24 h	107	3	12.5118	4.88309	0.022821	0.112844	procaterol	trt_cp	0.12 uM	24 h	Embryonic Stem Cell
Embryonic Stem Cell;R-547;trt_cp;0.12 uM;24 h	107	3	10.1941	8.02684	4.96924e-05	0.00115928	R-547	trt_cp	0.12 uM	24 h	Embryonic Stem Cell
Epithelial Cell;vorinostat;trt_cp;0.12 uM;24 h	4104	5	8.57701	1.21622	0.290731	0.492514	vorinostat	trt_cp	0.12 uM	24 h	Epithelial Cell
Epithelial Cell;geldanamycin;trt_cp;0.12 uM;24 h	4104	17	20.687	7.55888	1.1233e-06	5.23749e-05	geldanamycin	trt_cp	0.12 uM	24 h	Epithelial Cell
Bone Marrow Stem Cell;UNC-1215;trt_cp;0.12 uM;24 h	331	4	2.16873	0.391198	0.721567	0.835492	UNC-1215	trt_cp	0.12 uM	24 h	Bone Marrow Stem Cell
Bone Marrow Stem Cell;NVP-BHG712;trt_cp;0.12 uM;24 h	331	6	-1.53582	-0.536078	0.614163	0.759021	NVP-BHG712	trt_cp	0.12 uM	24 h	Bone Marrow Stem Cell
Adipose-derived Stem Cell;AZ-20;trt_cp;0.12 uM;24 h	478	3	1.7152	0.619897	0.597258	0.745889	AZ-20	trt_cp	0.12 uM	24 h	Adipose-derived Stem Cell
Bone Marrow Stem Cell;QL-XI-92;trt_cp;0.12 uM;24 h	331	6	2.59943	0.908183	0.404132	0.594778	QL-XI-92	trt_cp	0.12 uM	24 h	Bone Marrow Stem Cell
Epithelial Cell;BRD-K93425199;trt_cp;0.12 uM;24 h	4104	3	-8.06311	-2.04181	0.177717	0.370586	BRD-K93425199	trt_cp	0.12 uM	24 h	Epithelial Cell
Bone Marrow Stem Cell;rebastinib;trt_cp;0.12 uM;24 h	331	5	-3.97439	-3.08185	0.0294194	0.132306	rebastinib	trt_cp	0.12 uM	24 h	Bone Marrow Stem Cell
Adipose-derived Stem Cell;IOX2;trt_cp;0.12 uM;24 h	478	4	0.200421	0.0443864	0.967363	0.982613	IOX2	trt_cp	0.12 uM	24 h	Adipose-derived Stem Cell
Neural Progenitor Cell;XMD-1499;trt_cp;0.12 uM;24 h	1286	9	-8.30937	-11.0047	1.25779e-07	7.85795e-06	XMD-1499	trt_cp	0.12 uM	24 h	Neural Progenitor Cell
Adipose-derived Stem Cell;NVP-TAE226;trt_cp;0.12 uM;24 h	478	4	5.88766	2.84029	0.0624867	0.205096	NVP-TAE226	trt_cp	0.12 uM	24 h	Adipose-derived Stem Cell
Adipose-derived Stem Cell;VE-821;trt_cp;0.12 uM;24 h	478	3	2.33651	1.42368	0.282922	0.48548	VE-821	trt_cp	0.12 uM	24 h	Adipose-derived Stem Cell
Epithelial Cell;BRD-K16410418;trt_cp;0.12 uM;24 h	4104	3	26.2898	20.8375	0.00212012	0.0220557	BRD-K16410418	trt_cp	0.12 uM	24 h	Epithelial Cell
Epithelial Cell;mitoxantrone;trt_cp;0.12 uM;24 h	4104	7	29.9236	9.43841	7.9223e-05	0.00169736	mitoxantrone	trt_cp	0.12 uM	24 h	Epithelial Cell
Neural Progenitor Cell;ibrutinib;trt_cp;0.12 uM;24 h	1286	6	-7.10867	-5.1694	0.0025465	0.0252441	ibrutinib	trt_cp	0.12 uM	24 h	Neural Progenitor Cell
HSC;GSK-J2;trt_cp;0.12 uM;24 h	179	3	-2.07451	-0.798613	0.50585	0.676598	GSK-J2	trt_cp	0.12 uM	24 h	HSC
Neural Progenitor Cell;alectinib;trt_cp;0.12 uM;24 h	1286	9	-7.80794	-8.82702	3.15509e-06	0.000123943	alectinib	trt_cp	0.12 uM	24 h	Neural Progenitor Cell
HSC;BIX-01294;trt_cp;0.12 uM;24 h	179	3	-4.08892	-1.16223	0.363214	0.558768	BIX-01294	trt_cp	0.12 uM	24 h	HSC
Neural Progenitor Cell;KW-2449;trt_cp;0.12 uM;24 h	1286	7	-6.94189	-8.46405	2.1333e-05	0.000588245	KW-2449	trt_cp	0.12 uM	24 h	Neural Progenitor Cell
Embryonic Stem Cell;AST-1306;trt_cp;0.12 uM;24 h	107	3	-7.7599	-7.78437	1.39376e-09	1.41495e-07	AST-1306	trt_cp	0.12 uM	24 h	Embryonic Stem Cell
Embryonic Stem Cell;HG-14-10-04;trt_cp;0.12 uM;24 h	107	3	-7.18923	-7.80962	5.39312e-12	1.05811e-09	HG-14-10-04	trt_cp	0.12 uM	24 h	Embryonic Stem Cell
Kidney Cell;JNJ-38877605;trt_cp;0.12 uM;24 h	1114	3	-1.56465	-0.841036	0.487667	0.662421	JNJ-38877605	trt_cp	0.12 uM	24 h	Kidney Cell
Embryonic Stem Cell;oncrasin-1;trt_cp;0.12 uM;24 h	107	3	13.2049	8.24602	0.000931719	0.011596	oncrasin-1	trt_cp	0.12 uM	24 h	Embryonic Stem Cell
Embryonic Stem Cell;DL-PDMP;trt_cp;0.12 uM;24 h	107	3	12.3245	6.95485	0.00328156	0.0304549	DL-PDMP	trt_cp	0.12 uM	24 h	Embryonic Stem Cell
Embryonic Stem Cell;alectinib;trt_cp;0.12 uM;24 h	107	3	12.8822	10.55	1.99613e-06	8.48798e-05	alectinib	trt_cp	0.12 uM	24 h	Embryonic Stem Cell
Embryonic Stem Cell;crizotinib;trt_cp;0.12 uM;24 h	107	3	10.9528	10.1585	3.86487e-09	3.5426e-07	crizotinib	trt_cp	0.12 uM	24 h	Embryonic Stem Cell
Embryonic Stem Cell;calcipotriol;trt_cp;0.12 uM;24 h	107	3	11.7018	6.08513	0.00699014	0.0524305	calcipotriol	trt_cp	0.12 uM	24 h	Embryonic Stem Cell
Bone Marrow Stem Cell;HG-9-91-01;trt_cp;0.12 uM;24 h	331	5	-0.838616	-0.332523	0.755522	0.857442	HG-9-91-01	trt_cp	0.12 uM	24 h	Bone Marrow Stem Cell
Neural Progenitor Cell;pyrazolanthrone;trt_cp;0.12 uM;24 h	1286	9	-6.89253	-5.59269	0.000308091	0.00484443	pyrazolanthrone	trt_cp	0.12 uM	24 h	Neural Progenitor Cell
Epithelial Cell;lapatinib;trt_cp;0.12 uM;24 h	4104	3	4.29552	1.5134	0.268969	0.47138	lapatinib	trt_cp	0.12 uM	24 h	Epithelial Cell
Epithelial Cell;TG-101209;trt_cp;0.12 uM;24 h	4104	3	-6.82053	-6.9767	0.0185208	0.099203	TG-101209	trt_cp	0.12 uM	24 h	Epithelial Cell
Bone Marrow Stem Cell;GSK-461364;trt_cp;0.12 uM;24 h	331	4	3.21451	0.947167	0.411947	0.601389	GSK-461364	trt_cp	0.12 uM	24 h	Bone Marrow Stem Cell
Bone Marrow Stem Cell;tivantinib;trt_cp;0.12 uM;24 h	331	5	-2.69996	-1.0955	0.332308	0.531468	tivantinib	trt_cp	0.12 uM	24 h	Bone Marrow Stem Cell
Endothelial Cell;TAK-715;trt_cp;0.12 uM;24 h	569	4	-1.91523	-0.822324	0.470375	0.648782	TAK-715	trt_cp	0.12 uM	24 h	Endothelial Cell
Bone Marrow Stem Cell;AZD-4547;trt_cp;0.12 uM;24 h	331	5	-0.665628	-0.318646	0.765012	0.863634	AZD-4547	trt_cp	0.12 uM	24 h	Bone Marrow Stem Cell
Endothelial Cell;WZ-7043;trt_cp;0.12 uM;24 h	569	3	-1.61224	-0.630564	0.592101	0.742155	WZ-7043	trt_cp	0.12 uM	24 h	Endothelial Cell
Neural Progenitor Cell;BI-2536;trt_cp;0.12 uM;24 h	1286	9	-7.49649	-5.90611	0.000212932	0.00365956	BI-2536	trt_cp	0.12 uM	24 h	Neural Progenitor Cell
Epithelial Cell;PCI-34051;trt_cp;0.12 uM;24 h	4104	3	28.2698	70.5161	5.40401e-05	0.00124566	PCI-34051	trt_cp	0.12 uM	24 h	Epithelial Cell
Epithelial Cell;BRD-K98948170;trt_cp;0.12 uM;24 h	4104	3	28.6248	54.5299	0.000170689	0.00308698	BRD-K98948170	trt_cp	0.12 uM	24 h	Epithelial Cell
Epithelial Cell;selumetinib;trt_cp;0.12 uM;24 h	4104	3	7.45834	2.85222	0.103632	0.273797	selumetinib	trt_cp	0.12 uM	24 h	Epithelial Cell
Adipose-derived Stem Cell;serdemetan;trt_cp;0.12 uM;24 h	478	3	1.09484	0.519977	0.653087	0.788295	serdemetan	trt_cp	0.12 uM	24 h	Adipose-derived Stem Cell
Bone Marrow Stem Cell;ACY-1215;trt_cp;0.12 uM;24 h	331	4	2.02065	0.395775	0.718483	0.833136	ACY-1215	trt_cp	0.12 uM	24 h	Bone Marrow Stem Cell
Endothelial Cell;garcinol;trt_cp;0.12 uM;24 h	569	4	-0.439432	-0.308675	0.777047	0.87139	garcinol	trt_cp	0.12 uM	24 h	Endothelial Cell
Bone Marrow Stem Cell;MGCD-265;trt_cp;0.12 uM;24 h	331	6	0.664338	0.257577	0.8066	0.890008	MGCD-265	trt_cp	0.12 uM	24 h	Bone Marrow Stem Cell
Embryonic Stem Cell;BMS-777607;trt_cp;0.12 uM;24 h	107	3	-8.07689	-7.46971	5.08015e-07	2.63617e-05	BMS-777607	trt_cp	0.12 uM	24 h	Embryonic Stem Cell
Embryonic Stem Cell;BMS-509744;trt_cp;0.12 uM;24 h	107	3	-6.96505	-7.6087	1.25389e-11	2.20047e-09	BMS-509744	trt_cp	0.12 uM	24 h	Embryonic Stem Cell
Embryonic Stem Cell;BS-181;trt_cp;0.12 uM;24 h	107	3	-7.55914	-8.0943	2.65633e-12	5.55491e-10	BS-181	trt_cp	0.12 uM	24 h	Embryonic Stem Cell
Kidney Cell;BAY-61-3606;trt_cp;0.12 uM;24 h	1114	3	-2.72082	-1.36275	0.304584	0.505296	BAY-61-3606	trt_cp	0.12 uM	24 h	Kidney Cell
Embryonic Stem Cell;sorafenib;trt_cp;0.12 uM;24 h	107	3	10.1817	5.26385	0.0109992	0.0711082	sorafenib	trt_cp	0.12 uM	24 h	Embryonic Stem Cell
Embryonic Stem Cell;BRD-K61033289;trt_cp;0.12 uM;24 h	107	3	12.4629	6.11855	0.00819168	0.0584505	BRD-K61033289	trt_cp	0.12 uM	24 h	Embryonic Stem Cell
Neural Progenitor Cell;masitinib;trt_cp;0.12 uM;24 h	1286	5	-7.84496	-9.44717	0.000124404	0.00242849	masitinib	trt_cp	0.12 uM	24 h	Neural Progenitor Cell
Bone Marrow Stem Cell;dabrafenib;trt_cp;0.12 uM;24 h	331	6	0.910977	0.326422	0.756887	0.858318	dabrafenib	trt_cp	0.12 uM	24 h	Bone Marrow Stem Cell
Neural Progenitor Cell;amuvatinib;trt_cp;0.12 uM;24 h	1286	7	-8.39821	-6.75079	0.000281695	0.00451475	amuvatinib	trt_cp	0.12 uM	24 h	Neural Progenitor Cell
Neural Progenitor Cell;GSK-J1;trt_cp;0.12 uM;24 h	1286	9	-7.50534	-9.1801	1.46186e-06	6.57894e-05	GSK-J1	trt_cp	0.12 uM	24 h	Neural Progenitor Cell
Bone Marrow Stem Cell;A-66;trt_cp;0.12 uM;24 h	331	4	-4.21315	-0.9769	0.399718	0.591072	A-66	trt_cp	0.12 uM	24 h	Bone Marrow Stem Cell
Adipose-derived Stem Cell;GSK-1070916;trt_cp;0.12 uM;24 h	478	4	1.49141	0.632499	0.570662	0.726575	GSK-1070916	trt_cp	0.12 uM	24 h	Adipose-derived Stem Cell
Fibroblast;wortmannin;trt_cp;0.12 uM;24 h	329	10	5.21821	1.82439	0.0991064	0.266792	wortmannin	trt_cp	0.12 uM	24 h	Fibroblast
Epithelial Cell;alpelisib;trt_cp;0.12 uM;24 h	4104	3	13.2797	2.44801	0.133995	0.316099	alpelisib	trt_cp	0.12 uM	24 h	Epithelial Cell
Epithelial Cell;AZD-5438;trt_cp;0.12 uM;24 h	4104	3	6.2414	7.55515	0.015303	0.0880005	AZD-5438	trt_cp	0.12 uM	24 h	Epithelial Cell
Epithelial Cell;BRD-A11087911;trt_cp;0.12 uM;24 h	4104	3	-7.72724	-11.1024	0.00658177	0.05044	BRD-A11087911	trt_cp	0.12 uM	24 h	Epithelial Cell
Neural Progenitor Cell;veliparib;trt_cp;0.12 uM;24 h	1286	17	-8.4986	-11.269	4.47895e-11	6.89068e-09	veliparib	trt_cp	0.12 uM	24 h	Neural Progenitor Cell
Neural Progenitor Cell;regorafenib;trt_cp;0.12 uM;24 h	1286	9	-6.93318	-4.51484	0.00156018	0.0174971	regorafenib	trt_cp	0.12 uM	24 h	Neural Progenitor Cell
Bone Marrow Stem Cell;CTB;trt_cp;0.12 uM;24 h	331	4	4.25744	1.19313	0.316941	0.517197	CTB	trt_cp	0.12 uM	24 h	Bone Marrow Stem Cell
HSC;SB-203580;trt_cp;0.12 uM;24 h	179	3	1.88974	0.699665	0.554607	0.714495	SB-203580	trt_cp	0.12 uM	24 h	HSC
Neural Progenitor Cell;olaparib;trt_cp;0.12 uM;24 h	1286	17	-6.17417	-6.65802	1.45701e-06	6.57891e-05	olaparib	trt_cp	0.12 uM	24 h	Neural Progenitor Cell
Adipose-derived Stem Cell;KIN001-244;trt_cp;0.12 uM;24 h	478	5	4.86602	2.09195	0.102334	0.271849	KIN001-244	trt_cp	0.12 uM	24 h	Adipose-derived Stem Cell
Endothelial Cell;NU-7026;trt_cp;0.12 uM;24 h	569	5	-2.60196	-2.32175	0.0769797	0.231519	NU-7026	trt_cp	0.12 uM	24 h	Endothelial Cell
Epithelial Cell;CP-466722;trt_cp;0.12 uM;24 h	4104	3	6.1996	2.4558	0.132908	0.314659	CP-466722	trt_cp	0.12 uM	24 h	Epithelial Cell
HSC;VE-821;trt_cp;0.12 uM;24 h	179	3	3.41553	1.34315	0.307413	0.507746	VE-821	trt_cp	0.12 uM	24 h	HSC
Endothelial Cell;BRD-K55591206;trt_cp;0.12 uM;24 h	569	5	-4.36514	-8.70561	0.000184732	0.00327982	BRD-K55591206	trt_cp	0.12 uM	24 h	Endothelial Cell
Adipose-derived Stem Cell;D-4476;trt_cp;0.12 uM;24 h	478	4	2.6002	1.25391	0.295399	0.496736	D-4476	trt_cp	0.12 uM	24 h	Adipose-derived Stem Cell
Neural Progenitor Cell;GSK-J4;trt_cp;0.12 uM;24 h	1286	9	-8.16121	-8.0447	1.18145e-05	0.000362882	GSK-J4	trt_cp	0.12 uM	24 h	Neural Progenitor Cell
Bone Marrow Stem Cell;GSK-2334470;trt_cp;0.12 uM;24 h	331	6	0.312509	0.125103	0.905115	0.948204	GSK-2334470	trt_cp	0.12 uM	24 h	Bone Marrow Stem Cell
Neural Progenitor Cell;ALW-II-49-7;trt_cp;0.12 uM;24 h	1286	7	-8.969	-5.97653	0.000692862	0.00918285	ALW-II-49-7	trt_cp	0.12 uM	24 h	Neural Progenitor Cell
Endothelial Cell;AT-7867;trt_cp;0.12 uM;24 h	569	3	1.77184	2.1804	0.146319	0.332158	AT-7867	trt_cp	0.12 uM	24 h	Endothelial Cell
Neural Progenitor Cell;XMD-885;trt_cp;0.12 uM;24 h	1286	6	-8.61279	-5.11805	0.00298837	0.0284752	XMD-885	trt_cp	0.12 uM	24 h	Neural Progenitor Cell
Kidney Cell;rigosertib;trt_cp;0.12 uM;24 h	1114	3	-3.16228	-6.60246	0.0112562	0.0720624	rigosertib	trt_cp	0.12 uM	24 h	Kidney Cell
Embryonic Stem Cell;sunitinib;trt_cp;0.12 uM;24 h	107	3	-7.21342	-6.96414	1.72025e-07	1.02871e-05	sunitinib	trt_cp	0.12 uM	24 h	Embryonic Stem Cell
Bone Marrow Stem Cell;EX-527;trt_cp;0.12 uM;24 h	331	4	0.9724	0.203802	0.851406	0.916772	EX-527	trt_cp	0.12 uM	24 h	Bone Marrow Stem Cell
Bone Marrow Stem Cell;rucaparib;trt_cp;0.12 uM;24 h	331	4	0.368524	0.0874023	0.935781	0.965225	rucaparib	trt_cp	0.12 uM	24 h	Bone Marrow Stem Cell
Bone Marrow Stem Cell;AZ-20;trt_cp;0.12 uM;24 h	331	4	1.70084	0.282506	0.795798	0.883903	AZ-20	trt_cp	0.12 uM	24 h	Bone Marrow Stem Cell
Bone Marrow Stem Cell;KIN001-127;trt_cp;0.12 uM;24 h	331	6	-3.77634	-1.13917	0.305058	0.50577	KIN001-127	trt_cp	0.12 uM	24 h	Bone Marrow Stem Cell
Neural Progenitor Cell;ZM-447439;trt_cp;0.12 uM;24 h	1286	9	-6.80283	-8.27067	4.22961e-06	0.000157811	ZM-447439	trt_cp	0.12 uM	24 h	Neural Progenitor Cell
Epithelial Cell;TWS-119;trt_cp;0.12 uM;24 h	4104	3	4.03968	6.46491	0.0194185	0.102376	TWS-119	trt_cp	0.12 uM	24 h	Epithelial Cell
Neural Progenitor Cell;OSI-930;trt_cp;0.12 uM;24 h	1286	6	-7.69275	-8.7549	6.63501e-05	0.00147027	OSI-930	trt_cp	0.12 uM	24 h	Neural Progenitor Cell
Neural Progenitor Cell;WZ-7043;trt_cp;0.12 uM;24 h	1286	6	-5.58664	-3.13709	0.0235087	0.11513	WZ-7043	trt_cp	0.12 uM	24 h	Neural Progenitor Cell
Neural Progenitor Cell;methylstat;trt_cp;0.12 uM;24 h	1286	9	-8.02985	-13.141	8.58702e-10	9.34219e-08	methylstat	trt_cp	0.12 uM	24 h	Neural Progenitor Cell
Epithelial Cell;REV-5901;trt_cp;0.12 uM;24 h	4104	3	2.45422	0.951601	0.441396	0.625527	REV-5901	trt_cp	0.12 uM	24 h	Epithelial Cell
Epithelial Cell;AZD-6482;trt_cp;0.12 uM;24 h	4104	3	5.11625	2.91584	0.0992527	0.26696	AZD-6482	trt_cp	0.12 uM	24 h	Epithelial Cell
Epithelial Cell;BRD-K71855865;trt_cp;0.12 uM;24 h	4104	3	-6.31264	-1.37138	0.303709	0.504384	BRD-K71855865	trt_cp	0.12 uM	24 h	Epithelial Cell
Endothelial Cell;GSK-1070916;trt_cp;0.12 uM;24 h	569	5	1.01892	0.514706	0.633385	0.773476	GSK-1070916	trt_cp	0.12 uM	24 h	Endothelial Cell
Adipose-derived Stem Cell;saracatinib;trt_cp;0.12 uM;24 h	478	4	2.45296	1.5676	0.20854	0.405525	saracatinib	trt_cp	0.12 uM	24 h	Adipose-derived Stem Cell
Embryonic Stem Cell;quizartinib;trt_cp;0.12 uM;24 h	107	6	2.20533	0.513366	0.627776	0.769338	quizartinib	trt_cp	0.12 uM	24 h	Embryonic Stem Cell
Embryonic Stem Cell;AZD-4547;trt_cp;0.12 uM;24 h	107	3	-5.17763	-3.69529	0.0112133	0.0719743	AZD-4547	trt_cp	0.12 uM	24 h	Embryonic Stem Cell
Embryonic Stem Cell;PF-04217903;trt_cp;0.12 uM;24 h	107	3	-8.29519	-8.54684	9.39071e-12	1.70808e-09	PF-04217903	trt_cp	0.12 uM	24 h	Embryonic Stem Cell
Adipose-derived Stem Cell;KW-2449;trt_cp;0.12 uM;24 h	478	6	2.6831	1.99855	0.0966348	0.263084	KW-2449	trt_cp	0.12 uM	24 h	Adipose-derived Stem Cell
Kidney Cell;GDC-0879;trt_cp;0.12 uM;24 h	1114	3	-4.0574	-7.55299	0.00957246	0.0646863	GDC-0879	trt_cp	0.12 uM	24 h	Kidney Cell
Endothelial Cell;I-BET-151;trt_cp;0.12 uM;24 h	569	4	-0.123419	-0.0752002	0.944663	0.96978	I-BET-151	trt_cp	0.12 uM	24 h	Endothelial Cell
Kidney Cell;KIN001-055;trt_cp;0.12 uM;24 h	1114	3	-0.634225	-0.610616	0.600895	0.748878	KIN001-055	trt_cp	0.12 uM	24 h	Kidney Cell
Embryonic Stem Cell;BRD-K68336408;trt_cp;0.12 uM;24 h	107	3	-7.23842	-7.57237	1.27879e-10	1.7243e-08	BRD-K68336408	trt_cp	0.12 uM	24 h	Embryonic Stem Cell
Embryonic Stem Cell;GSK-1059615;trt_cp;0.12 uM;24 h	107	3	-7.31498	-7.28709	1.08328e-08	8.90863e-07	GSK-1059615	trt_cp	0.12 uM	24 h	Embryonic Stem Cell
Embryonic Stem Cell;GDC-0068;trt_cp;0.12 uM;24 h	107	3	-7.4688	-6.64463	1.01719e-05	0.00032294	GDC-0068	trt_cp	0.12 uM	24 h	Embryonic Stem Cell
Kidney Cell;ponatinib;trt_cp;0.12 uM;24 h	1114	3	-3.36225	-1.55013	0.259867	0.462273	ponatinib	trt_cp	0.12 uM	24 h	Kidney Cell
Embryonic Stem Cell;equilin;trt_cp;0.12 uM;24 h	107	3	9.72534	5.68332	0.00557687	0.0447933	equilin	trt_cp	0.12 uM	24 h	Embryonic Stem Cell
Embryonic Stem Cell;vandetanib;trt_cp;0.12 uM;24 h	107	5	4.35931	1.0574	0.34482	0.542756	vandetanib	trt_cp	0.12 uM	24 h	Embryonic Stem Cell
Epithelial Cell;BRD-K35860134;trt_cp;0.12 uM;24 h	4104	3	25.1478	11.1145	0.00785427	0.0567665	BRD-K35860134	trt_cp	0.12 uM	24 h	Epithelial Cell
Epithelial Cell;MK-5108;trt_cp;0.12 uM;24 h	4104	3	28.8703	22.2614	0.0018625	0.0199706	MK-5108	trt_cp	0.12 uM	24 h	Epithelial Cell
Epithelial Cell;erismo-ester;trt_cp;0.12 uM;24 h	4104	3	-9.66555	-4.57664	0.0440839	0.16786	erismo-ester	trt_cp	0.12 uM	24 h	Epithelial Cell
Adipose-derived Stem Cell;JNK-IN-5A;trt_cp;0.12 uM;24 h	478	4	1.15796	2.45048	0.0389655	0.156305	JNK-IN-5A	trt_cp	0.12 uM	24 h	Adipose-derived Stem Cell
Adipose-derived Stem Cell;OSI-930;trt_cp;0.12 uM;24 h	478	5	0.789164	0.663468	0.53912	0.702473	OSI-930	trt_cp	0.12 uM	24 h	Adipose-derived Stem Cell
HSC;ALW-II-38-3;trt_cp;0.12 uM;24 h	179	3	4.08687	2.16844	0.154338	0.34302	ALW-II-38-3	trt_cp	0.12 uM	24 h	HSC
Bone Marrow Stem Cell;CC-401;trt_cp;0.12 uM;24 h	331	6	1.44589	0.517104	0.62641	0.768338	CC-401	trt_cp	0.12 uM	24 h	Bone Marrow Stem Cell
HSC;BRD-A92800748;trt_cp;0.12 uM;24 h	179	3	5.03274	2.65405	0.109901	0.283065	BRD-A92800748	trt_cp	0.12 uM	24 h	HSC
Bone Marrow Stem Cell;BS-181;trt_cp;0.12 uM;24 h	331	5	-2.51444	-0.932329	0.402127	0.593053	BS-181	trt_cp	0.12 uM	24 h	Bone Marrow Stem Cell
Epithelial Cell;PHA-793887;trt_cp;0.12 uM;24 h	4104	3	0.486014	0.138001	0.902856	0.946946	PHA-793887	trt_cp	0.12 uM	24 h	Epithelial Cell
Epithelial Cell;AT-7519;trt_cp;0.12 uM;24 h	4104	3	13.9259	7.70303	0.0160685	0.0910238	AT-7519	trt_cp	0.12 uM	24 h	Epithelial Cell
Epithelial Cell;BRD-K42991516;trt_cp;0.12 uM;24 h	4104	3	-10.3971	-4.87686	0.0391143	0.156722	BRD-K42991516	trt_cp	0.12 uM	24 h	Epithelial Cell
Adipose-derived Stem Cell;veliparib;trt_cp;0.12 uM;24 h	478	8	1.07373	0.731407	0.486422	0.661408	veliparib	trt_cp	0.12 uM	24 h	Adipose-derived Stem Cell
Neural Progenitor Cell;BRD-A92800748;trt_cp;0.12 uM;24 h	1286	9	-7.90461	-9.07671	2.25376e-06	9.32558e-05	BRD-A92800748	trt_cp	0.12 uM	24 h	Neural Progenitor Cell
Epithelial Cell;BRD-K43177857;trt_cp;0.12 uM;24 h	4104	3	-4.41417	-4.44607	0.0447872	0.169428	BRD-K43177857	trt_cp	0.12 uM	24 h	Epithelial Cell
Endothelial Cell;PFI-1;trt_cp;0.12 uM;24 h	569	5	-1.02584	-0.888689	0.421676	0.609125	PFI-1	trt_cp	0.12 uM	24 h	Endothelial Cell
Neural Progenitor Cell;SB-525334;trt_cp;0.12 uM;24 h	1286	7	-7.37951	-7.0568	0.000161135	0.00293962	SB-525334	trt_cp	0.12 uM	24 h	Neural Progenitor Cell
Endothelial Cell;GW-842166;trt_cp;10 uM;24 h	569	3	-1.37148	-0.520326	0.654194	0.788896	GW-842166	trt_cp	10 uM	24 h	Endothelial Cell
Kidney Cell;SCH-28080;trt_cp;10 uM;24 h	1114	3	1.73629	1.21271	0.346284	0.54406	SCH-28080	trt_cp	10 uM	24 h	Kidney Cell
Kidney Cell;epirubicin;trt_cp;10 uM;24 h	1114	3	-7.65266	-2.01959	0.180385	0.373908	epirubicin	trt_cp	10 uM	24 h	Kidney Cell
Endothelial Cell;methiopril;trt_cp;10 uM;24 h	569	3	-0.835277	-0.257931	0.820417	0.898223	methiopril	trt_cp	10 uM	24 h	Endothelial Cell
Epithelial Cell;BRD-A13133631;trt_cp;10 uM;24 h	4104	4	-7.69741	-5.8625	0.0094835	0.0642503	BRD-A13133631	trt_cp	10 uM	24 h	Epithelial Cell
Kidney Cell;cefoperazone;trt_cp;10 uM;24 h	1114	3	2.11206	1.24744	0.336482	0.535101	cefoperazone	trt_cp	10 uM	24 h	Kidney Cell
Kidney Cell;altrenogest;trt_cp;10 uM;24 h	1114	3	0.291004	0.400222	0.72425	0.837183	altrenogest	trt_cp	10 uM	24 h	Kidney Cell
Kidney Cell;theobromine;trt_cp;10 uM;24 h	1114	3	4.08817	2.78449	0.105438	0.276774	theobromine	trt_cp	10 uM	24 h	Kidney Cell
Kidney Cell;BRD-K15318383;trt_cp;10 uM;24 h	1114	3	-0.0442655	-0.0172483	0.987793	0.993842	BRD-K15318383	trt_cp	10 uM	24 h	Kidney Cell
Kidney Cell;sirolimus;trt_cp;10 uM;24 h	1114	7	3.01798	2.40992	0.0511844	0.182368	sirolimus	trt_cp	10 uM	24 h	Kidney Cell
Endothelial Cell;PF-04620110;trt_cp;10 uM;24 h	569	3	0.0775746	0.0457854	0.967542	0.982709	PF-04620110	trt_cp	10 uM	24 h	Endothelial Cell
Kidney Cell;histamine;trt_cp;10 uM;24 h	1114	3	1.22017	0.617627	0.599015	0.747345	histamine	trt_cp	10 uM	24 h	Kidney Cell
Kidney Cell;tetrindole;trt_cp;10 uM;24 h	1114	3	6.14694	3.40276	0.0748202	0.227609	tetrindole	trt_cp	10 uM	24 h	Kidney Cell
Embryonic Stem Cell;AZ-628;trt_cp;10 uM;24 h	107	6	5.88866	1.11699	0.312045	0.512434	AZ-628	trt_cp	10 uM	24 h	Embryonic Stem Cell
Epithelial Cell;tolbutamide;trt_cp;10 uM;6 h	585	5	-5.55773	-4.18214	0.00860836	0.0604403	tolbutamide	trt_cp	10 uM	6 h	Epithelial Cell
Epithelial Cell;vidarabine;trt_cp;10 uM;6 h	585	3	-3.60728	-2.81489	0.0808506	0.238073	vidarabine	trt_cp	10 uM	6 h	Epithelial Cell
Epithelial Cell;BRD-K58479490;trt_cp;10 uM;6 h	585	4	-7.50657	-1.67973	0.189894	0.383889	BRD-K58479490	trt_cp	10 uM	6 h	Epithelial Cell
Epithelial Cell;BRD-K68826049;trt_cp;10 uM;6 h	585	3	1.67223	0.699751	0.552404	0.712749	BRD-K68826049	trt_cp	10 uM	6 h	Epithelial Cell
Epithelial Cell;trazodone;trt_cp;10 uM;6 h	585	5	-8.2473	-3.24557	0.0289249	0.130729	trazodone	trt_cp	10 uM	6 h	Epithelial Cell
Epithelial Cell;BRD-K89997465;trt_cp;10 uM;6 h	585	9	-7.38624	-4.71493	0.000979959	0.0120802	BRD-K89997465	trt_cp	10 uM	6 h	Epithelial Cell
Epithelial Cell;SA-25547;trt_cp;10 uM;6 h	585	3	-6.84406	-2.8679	0.0954868	0.261298	SA-25547	trt_cp	10 uM	6 h	Epithelial Cell
Epithelial Cell;ST-4028268;trt_cp;10 uM;6 h	585	3	-13.1529	-5.24444	0.0302769	0.134506	ST-4028268	trt_cp	10 uM	6 h	Epithelial Cell
Epithelial Cell;BRD-K24426149;trt_cp;10 uM;6 h	585	5	-1.39045	-0.731173	0.501325	0.672967	BRD-K24426149	trt_cp	10 uM	6 h	Epithelial Cell
Epithelial Cell;BRD-K88965984;trt_cp;10 uM;6 h	585	7	-1.85589	-0.418887	0.689612	0.81288	BRD-K88965984	trt_cp	10 uM	6 h	Epithelial Cell
Epithelial Cell;BRD-K09784055;trt_cp;10 uM;24 h	4104	9	-7.21969	-5.73507	0.000410497	0.00604376	BRD-K09784055	trt_cp	10 uM	24 h	Epithelial Cell
Embryonic Stem Cell;dabrafenib;trt_cp;10 uM;24 h	107	3	20.1066	9.52017	0.00255531	0.0253017	dabrafenib	trt_cp	10 uM	24 h	Embryonic Stem Cell
Epithelial Cell;venlafaxine;trt_cp;10 uM;6 h	585	5	-9.07439	-4.77083	0.00676377	0.0513726	venlafaxine	trt_cp	10 uM	6 h	Epithelial Cell
Epithelial Cell;YL-55;trt_cp;10 uM;6 h	585	3	-5.0274	-1.58016	0.250359	0.451896	YL-55	trt_cp	10 uM	6 h	Epithelial Cell
Epithelial Cell;SD-6-035-B3;trt_cp;10 uM;6 h	585	3	-2.05296	-0.573898	0.62249	0.76518	SD-6-035-B3	trt_cp	10 uM	6 h	Epithelial Cell
Epithelial Cell;entacapone;trt_cp;10 uM;6 h	585	3	-3.16965	-1.16583	0.358743	0.555719	entacapone	trt_cp	10 uM	6 h	Epithelial Cell
Epithelial Cell;BRD-K67484673;trt_cp;10 uM;6 h	585	5	0.0139319	0.004388	0.996702	0.998217	BRD-K67484673	trt_cp	10 uM	6 h	Epithelial Cell
Epithelial Cell;BRD-A19037878;trt_cp;10 uM;6 h	585	43	-6.17832	-6.28746	3.17152e-08	2.28369e-06	BRD-A19037878	trt_cp	10 uM	6 h	Epithelial Cell
Epithelial Cell;BRD-K73315009;trt_cp;10 uM;6 h	585	3	4.90154	1.51125	0.265597	0.467647	BRD-K73315009	trt_cp	10 uM	6 h	Epithelial Cell
Epithelial Cell;naltrexone;trt_cp;10 uM;6 h	585	10	-2.78961	-2.13597	0.0552245	0.190605	naltrexone	trt_cp	10 uM	6 h	Epithelial Cell
Epithelial Cell;thioridazine;trt_cp;10 uM;6 h	585	10	-5.86539	-4.78867	0.000468115	0.00670549	thioridazine	trt_cp	10 uM	6 h	Epithelial Cell
Epithelial Cell;BRD-K41668190;trt_cp;10 uM;6 h	585	3	-3.51337	-1.2169	0.343026	0.541153	BRD-K41668190	trt_cp	10 uM	6 h	Epithelial Cell
Epithelial Cell;BRD-K05775306;trt_cp;10 uM;6 h	585	3	-8.23636	-3.43446	0.0685462	0.216651	BRD-K05775306	trt_cp	10 uM	6 h	Epithelial Cell
Epithelial Cell;thiostrepton;trt_cp;10 uM;6 h	585	6	-13.4941	-5.07057	0.00331839	0.0306493	thiostrepton	trt_cp	10 uM	6 h	Epithelial Cell
Epithelial Cell;phenoxybenzamine;trt_cp;10 uM;6 h	585	7	-1.91391	-1.07772	0.317984	0.518318	phenoxybenzamine	trt_cp	10 uM	6 h	Epithelial Cell
Epithelial Cell;nicardipine;trt_cp;10 uM;6 h	585	12	-2.48822	-1.85599	0.0850722	0.245037	nicardipine	trt_cp	10 uM	6 h	Epithelial Cell
Epithelial Cell;BRD-K66426634;trt_cp;10 uM;6 h	585	3	-8.87983	-5.13254	0.0272249	0.125781	BRD-K66426634	trt_cp	10 uM	6 h	Epithelial Cell
Epithelial Cell;proxymetacaine;trt_cp;10 uM;6 h	585	7	-4.42229	-2.37252	0.0509725	0.181978	proxymetacaine	trt_cp	10 uM	6 h	Epithelial Cell
Epithelial Cell;raltitrexed;trt_cp;10 uM;6 h	585	4	-7.10369	-1.91838	0.148372	0.33496	raltitrexed	trt_cp	10 uM	6 h	Epithelial Cell
Epithelial Cell;ZG-10;trt_cp;10 uM;6 h	585	3	-4.44415	-1.56969	0.251407	0.453016	ZG-10	trt_cp	10 uM	6 h	Epithelial Cell
Epithelial Cell;BRD-A55565369;trt_cp;10 uM;6 h	585	3	-7.52748	-4.82632	0.0290798	0.131187	BRD-A55565369	trt_cp	10 uM	6 h	Epithelial Cell
Epithelial Cell;wortmannin;trt_cp;10 uM;6 h	585	50	-3.21445	-3.28456	0.00155064	0.0174293	wortmannin	trt_cp	10 uM	6 h	Epithelial Cell
Epithelial Cell;TBEP;trt_cp;10 uM;6 h	585	3	-6.12584	-8.89843	0.000185033	0.0032811	TBEP	trt_cp	10 uM	6 h	Epithelial Cell
Epithelial Cell;BRD-K98991361;trt_cp;10 uM;6 h	585	4	-2.63538	-1.19853	0.310808	0.511322	BRD-K98991361	trt_cp	10 uM	6 h	Epithelial Cell
Epithelial Cell;benazepril;trt_cp;10 uM;6 h	585	5	-6.49935	-5.10392	0.00352077	0.0320532	benazepril	trt_cp	10 uM	6 h	Epithelial Cell
Neural Progenitor Cell;fulvestrant;trt_cp;10 uM;24 h	1286	5	1.11164	0.396637	0.711376	0.828333	fulvestrant	trt_cp	10 uM	24 h	Neural Progenitor Cell
Neural Progenitor Cell;BRD-K57420195;trt_cp;10 uM;24 h	1286	3	-3.35035	-1.18796	0.35408	0.551314	BRD-K57420195	trt_cp	10 uM	24 h	Neural Progenitor Cell
Neural Progenitor Cell;BRD-K44635753;trt_cp;10 uM;24 h	1286	3	1.23085	0.847294	0.478495	0.654915	BRD-K44635753	trt_cp	10 uM	24 h	Neural Progenitor Cell
Neural Progenitor Cell;BRD-K07244661;trt_cp;10 uM;24 h	1286	3	-2.83174	-1.53469	0.257273	0.459343	BRD-K07244661	trt_cp	10 uM	24 h	Neural Progenitor Cell
Neural Progenitor Cell;BRD-K77793090;trt_cp;10 uM;24 h	1286	3	-0.667228	-0.213321	0.850473	0.916301	BRD-K77793090	trt_cp	10 uM	24 h	Neural Progenitor Cell
Kidney Cell;dyphylline;trt_cp;10 uM;6 h	21	5	4.5686	3.08281	0.014255	0.0841923	dyphylline	trt_cp	10 uM	6 h	Kidney Cell
Neural Progenitor Cell;BRD-K66658536;trt_cp;10 uM;24 h	1286	3	4.57931	2.79938	0.098292	0.265541	BRD-K66658536	trt_cp	10 uM	24 h	Neural Progenitor Cell
Neural Progenitor Cell;BRD-K22912836;trt_cp;10 uM;24 h	1286	3	6.19401	0.933749	0.448604	0.630929	BRD-K22912836	trt_cp	10 uM	24 h	Neural Progenitor Cell
Neural Progenitor Cell;SA-419083;trt_cp;10 uM;24 h	1286	3	3.01269	0.529216	0.649223	0.785206	SA-419083	trt_cp	10 uM	24 h	Neural Progenitor Cell
HSC;UTMB-00042;trt_cp;10 uM;6 h	25	3	-2.95913	-1.34479	0.266959	0.469066	UTMB-00042	trt_cp	10 uM	6 h	HSC
Neural Progenitor Cell;SA-424828;trt_cp;10 uM;24 h	1286	3	-2.88585	-1.04755	0.402197	0.593099	SA-424828	trt_cp	10 uM	24 h	Neural Progenitor Cell
Neural Progenitor Cell;BRD-K85236313;trt_cp;10 uM;24 h	1286	3	-1.78856	-0.309199	0.786247	0.877579	BRD-K85236313	trt_cp	10 uM	24 h	Neural Progenitor Cell
Kidney Cell;dabrafenib;trt_cp;10 uM;24 h	1114	9	2.14367	0.859645	0.414791	0.603598	dabrafenib	trt_cp	10 uM	24 h	Kidney Cell
Neural Progenitor Cell;BRD-K96477379;trt_cp;10 uM;24 h	1286	3	1.94165	0.904575	0.457453	0.638233	BRD-K96477379	trt_cp	10 uM	24 h	Neural Progenitor Cell
Neural Progenitor Cell;BRD-K47512679;trt_cp;10 uM;24 h	1286	3	0.71661	0.33184	0.770312	0.867047	BRD-K47512679	trt_cp	10 uM	24 h	Neural Progenitor Cell
Neural Progenitor Cell;SA-90377;trt_cp;10 uM;24 h	1286	3	-1.99993	-3.5835	0.0186458	0.0996276	SA-90377	trt_cp	10 uM	24 h	Neural Progenitor Cell
Epithelial Cell;dimethylnitrosamine;trt_cp;10 uM;24 h	4104	6	-9.89285	-3.77543	0.0128592	0.078566	dimethylnitrosamine	trt_cp	10 uM	24 h	Epithelial Cell
Neural Progenitor Cell;LY-294002;trt_cp;10 uM;24 h	1286	9	0.597912	0.135082	0.895849	0.942607	LY-294002	trt_cp	10 uM	24 h	Neural Progenitor Cell
Neural Progenitor Cell;BRD-K30229575;trt_cp;10 uM;24 h	1286	3	-1.76353	-0.48817	0.673023	0.802067	BRD-K30229575	trt_cp	10 uM	24 h	Neural Progenitor Cell
Neural Progenitor Cell;SA-1921867;trt_cp;10 uM;24 h	1286	3	0.673012	0.0873332	0.938339	0.966583	SA-1921867	trt_cp	10 uM	24 h	Neural Progenitor Cell
Neural Progenitor Cell;BRD-K52006320;trt_cp;10 uM;24 h	1286	3	3.17324	1.27947	0.325402	0.525018	BRD-K52006320	trt_cp	10 uM	24 h	Neural Progenitor Cell
Kidney Cell;triflupromazine;trt_cp;10 uM;24 h	1114	7	7.24349	2.88459	0.0276207	0.126971	triflupromazine	trt_cp	10 uM	24 h	Kidney Cell
Kidney Cell;imipramine;trt_cp;10 uM;24 h	1114	8	8.53928	2.57749	0.0364524	0.150387	imipramine	trt_cp	10 uM	24 h	Kidney Cell
Kidney Cell;BRD-A19037878;trt_cp;10 uM;24 h	1114	9	8.77956	6.19225	0.000234087	0.00392275	BRD-A19037878	trt_cp	10 uM	24 h	Kidney Cell
Kidney Cell;BRD-U73308409;trt_cp;10 uM;24 h	1114	8	6.19513	2.28741	0.0557525	0.191582	BRD-U73308409	trt_cp	10 uM	24 h	Kidney Cell
Epithelial Cell;PD-169316;trt_cp;10 uM;24 h	4104	3	-5.28086	-1.88709	0.199352	0.394938	PD-169316	trt_cp	10 uM	24 h	Epithelial Cell
Epithelial Cell;BRD-K45330754;trt_cp;10 uM;6 h	585	3	-8.34466	-4.17201	0.0447254	0.169243	BRD-K45330754	trt_cp	10 uM	6 h	Epithelial Cell
Epithelial Cell;glibenclamide;trt_cp;10 uM;6 h	585	12	-3.81641	-2.52939	0.0250783	0.119581	glibenclamide	trt_cp	10 uM	6 h	Epithelial Cell
Epithelial Cell;L-689560;trt_cp;10 uM;24 h	4104	6	-6.00422	-4.74195	0.0049276	0.0410228	L-689560	trt_cp	10 uM	24 h	Epithelial Cell
Epithelial Cell;nimesulide;trt_cp;10 uM;24 h	4104	6	-5.3965	-2.05707	0.0945717	0.260078	nimesulide	trt_cp	10 uM	24 h	Epithelial Cell
Epithelial Cell;niclosamide;trt_cp;10 uM;6 h	585	8	-6.99554	-3.85286	0.00501082	0.0415406	niclosamide	trt_cp	10 uM	6 h	Epithelial Cell
Epithelial Cell;K784-3187;trt_cp;10 uM;6 h	585	6	-10.8773	-6.02064	0.00119529	0.0141502	K784-3187	trt_cp	10 uM	6 h	Epithelial Cell
Epithelial Cell;daunorubicin;trt_cp;10 uM;6 h	585	8	1.28756	1.06757	0.312853	0.513091	daunorubicin	trt_cp	10 uM	6 h	Epithelial Cell
Epithelial Cell;BRD-A72069525;trt_cp;10 uM;24 h	4104	3	-9.19939	-14.5084	0.00358359	0.0324293	BRD-A72069525	trt_cp	10 uM	24 h	Epithelial Cell
Epithelial Cell;hypericin;trt_cp;10 uM;6 h	585	3	-6.97105	-4.57536	0.0321378	0.139509	hypericin	trt_cp	10 uM	6 h	Epithelial Cell
Epithelial Cell;losartan;trt_cp;10 uM;6 h	585	3	-2.16254	-0.690578	0.558837	0.71751	losartan	trt_cp	10 uM	6 h	Epithelial Cell
Epithelial Cell;phenothiazine;trt_cp;10 uM;6 h	585	11	-4.25262	-2.9355	0.0124185	0.0769238	phenothiazine	trt_cp	10 uM	6 h	Epithelial Cell
Epithelial Cell;ibudilast;trt_cp;10 uM;24 h	4104	6	-5.763	-5.16126	0.00336876	0.0310169	ibudilast	trt_cp	10 uM	24 h	Epithelial Cell
Epithelial Cell;SR-27897;trt_cp;10 uM;24 h	4104	9	-0.655381	-0.333958	0.74694	0.851879	SR-27897	trt_cp	10 uM	24 h	Epithelial Cell
Epithelial Cell;MDL-72832;trt_cp;10 uM;24 h	4104	3	-6.9444	-2.84927	0.103747	0.273834	MDL-72832	trt_cp	10 uM	24 h	Epithelial Cell
Epithelial Cell;TWS-119;trt_cp;10 uM;24 h	4104	5	-0.37587	-0.262541	0.805715	0.889465	TWS-119	trt_cp	10 uM	24 h	Epithelial Cell
Epithelial Cell;FK-888;trt_cp;10 uM;24 h	4104	4	-5.73724	-3.47226	0.0396818	0.158287	FK-888	trt_cp	10 uM	24 h	Epithelial Cell
Epithelial Cell;felodipine;trt_cp;10 uM;24 h	4104	4	-5.90728	-4.4309	0.0207063	0.106219	felodipine	trt_cp	10 uM	24 h	Epithelial Cell
Epithelial Cell;toremifene;trt_cp;10 uM;6 h	585	6	-5.35125	-2.28591	0.0674758	0.214457	toremifene	trt_cp	10 uM	6 h	Epithelial Cell
Epithelial Cell;triprolidine;trt_cp;10 uM;24 h	4104	6	-8.10148	-13.1435	2.76979e-05	0.000722401	triprolidine	trt_cp	10 uM	24 h	Epithelial Cell
Epithelial Cell;graveoline;trt_cp;10 uM;24 h	4104	3	-10.6231	-8.86957	0.0117814	0.0742917	graveoline	trt_cp	10 uM	24 h	Epithelial Cell
Epithelial Cell;vincristine;trt_cp;10 uM;6 h	585	11	-2.34298	-0.824624	0.427952	0.614017	vincristine	trt_cp	10 uM	6 h	Epithelial Cell
Epithelial Cell;BRD-A47714657;trt_cp;10 uM;24 h	4104	3	-4.96492	-3.64919	0.0661414	0.212021	BRD-A47714657	trt_cp	10 uM	24 h	Epithelial Cell
Epithelial Cell;BRD-K27484191;trt_cp;10 uM;6 h	585	3	-6.12669	-1.14427	0.369675	0.564674	BRD-K27484191	trt_cp	10 uM	6 h	Epithelial Cell
Epithelial Cell;irinotecan;trt_cp;10 uM;24 h	4104	11	26.4104	12.5038	1.87137e-07	1.10395e-05	irinotecan	trt_cp	10 uM	24 h	Epithelial Cell
Epithelial Cell;BRD-K92419424;trt_cp;10 uM;24 h	4104	3	-11.0386	-10.9746	0.00747831	0.0548546	BRD-K92419424	trt_cp	10 uM	24 h	Epithelial Cell
Epithelial Cell;FPL-64176;trt_cp;10 uM;6 h	585	8	-2.0444	-1.90114	0.0865421	0.247238	FPL-64176	trt_cp	10 uM	6 h	Epithelial Cell
Epithelial Cell;ritodrine;trt_cp;10 uM;24 h	4104	9	-4.2588	-1.90229	0.0934453	0.258241	ritodrine	trt_cp	10 uM	24 h	Epithelial Cell
Epithelial Cell;BRD-K67941506;trt_cp;10 uM;24 h	4104	3	-7.5267	-4.55594	0.0441497	0.168017	BRD-K67941506	trt_cp	10 uM	24 h	Epithelial Cell
Epithelial Cell;indapamide;trt_cp;10 uM;6 h	585	8	-2.78803	-1.14965	0.285767	0.488179	indapamide	trt_cp	10 uM	6 h	Epithelial Cell
Epithelial Cell;SAL-1;trt_cp;10 uM;6 h	585	3	-1.88276	-0.376792	0.742069	0.849347	SAL-1	trt_cp	10 uM	6 h	Epithelial Cell
Epithelial Cell;albendazole;trt_cp;10 uM;24 h	4104	6	-3.89544	-2.13041	0.0859276	0.246214	albendazole	trt_cp	10 uM	24 h	Epithelial Cell
Epithelial Cell;BRD-K14048378;trt_cp;10 uM;24 h	4104	3	-5.31583	-2.55988	0.123947	0.302171	BRD-K14048378	trt_cp	10 uM	24 h	Epithelial Cell
Epithelial Cell;BRD-K53833301;trt_cp;10 uM;24 h	4104	3	-7.49877	-5.7784	0.0276552	0.127067	BRD-K53833301	trt_cp	10 uM	24 h	Epithelial Cell
Epithelial Cell;butabindide;trt_cp;10 uM;6 h	585	3	-5.40309	-5.05181	0.0167461	0.0930653	butabindide	trt_cp	10 uM	6 h	Epithelial Cell
Epithelial Cell;YM-298198;trt_cp;10 uM;6 h	585	5	-3.02481	-1.94503	0.113014	0.287227	YM-298198	trt_cp	10 uM	6 h	Epithelial Cell
Epithelial Cell;lonidamine;trt_cp;10 uM;6 h	585	3	-4.88472	-3.88114	0.0396864	0.158288	lonidamine	trt_cp	10 uM	6 h	Epithelial Cell
Epithelial Cell;CGS-15943;trt_cp;10 uM;24 h	4104	3	-8.85709	-6.13765	0.0247681	0.118653	CGS-15943	trt_cp	10 uM	24 h	Epithelial Cell
Epithelial Cell;talipexole;trt_cp;10 uM;24 h	4104	3	-6.56745	-2.93739	0.0983801	0.265656	talipexole	trt_cp	10 uM	24 h	Epithelial Cell
Epithelial Cell;iopanoic-acid;trt_cp;10 uM;6 h	585	3	-9.96917	-5.76409	0.0212062	0.108029	iopanoic-acid	trt_cp	10 uM	6 h	Epithelial Cell
Epithelial Cell;phenylbutazone;trt_cp;10 uM;24 h	4104	5	-2.14428	-0.55378	0.609178	0.755776	phenylbutazone	trt_cp	10 uM	24 h	Epithelial Cell
Epithelial Cell;ceforanide;trt_cp;10 uM;24 h	4104	3	-10.0206	-11.6959	0.00633447	0.0490784	ceforanide	trt_cp	10 uM	24 h	Epithelial Cell
Epithelial Cell;KU-14R;trt_cp;10 uM;6 h	585	3	-7.52142	-3.24336	0.0758249	0.229466	KU-14R	trt_cp	10 uM	6 h	Epithelial Cell
Epithelial Cell;cephaeline;trt_cp;10 uM;24 h	4104	3	20.0459	9.45039	0.0108072	0.0702574	cephaeline	trt_cp	10 uM	24 h	Epithelial Cell
Epithelial Cell;BRD-K95676198;trt_cp;10 uM;24 h	4104	3	-3.62846	-1.78875	0.214753	0.412766	BRD-K95676198	trt_cp	10 uM	24 h	Epithelial Cell
Epithelial Cell;BRD-K62902879;trt_cp;10 uM;24 h	4104	3	-7.19834	-4.509	0.0449617	0.169788	BRD-K62902879	trt_cp	10 uM	24 h	Epithelial Cell
Epithelial Cell;lawsone;trt_cp;10 uM;6 h	585	3	-8.63347	-2.17716	0.158367	0.347839	lawsone	trt_cp	10 uM	6 h	Epithelial Cell
Epithelial Cell;BRD-K01834163;trt_cp;10 uM;6 h	585	3	3.40742	1.05046	0.400369	0.591658	BRD-K01834163	trt_cp	10 uM	6 h	Epithelial Cell
Epithelial Cell;BRD-K35514965;trt_cp;10 uM;6 h	585	3	5.9441	2.5585	0.116365	0.291766	BRD-K35514965	trt_cp	10 uM	6 h	Epithelial Cell
Epithelial Cell;SU-11652;trt_cp;10 uM;6 h	585	3	0.595229	0.186961	0.868375	0.926899	SU-11652	trt_cp	10 uM	6 h	Epithelial Cell
Epithelial Cell;BRD-K94390040;trt_cp;10 uM;6 h	585	3	2.60818	0.852621	0.480589	0.656687	BRD-K94390040	trt_cp	10 uM	6 h	Epithelial Cell
Epithelial Cell;BRD-K13580623;trt_cp;10 uM;6 h	585	3	3.31062	1.50752	0.261474	0.463727	BRD-K13580623	trt_cp	10 uM	6 h	Epithelial Cell
Epithelial Cell;BRD-K56593336;trt_cp;10 uM;6 h	585	3	2.78908	0.582279	0.618432	0.762246	BRD-K56593336	trt_cp	10 uM	6 h	Epithelial Cell
Epithelial Cell;BRD-K14788918;trt_cp;10 uM;6 h	585	3	5.53605	2.12513	0.160501	0.350192	BRD-K14788918	trt_cp	10 uM	6 h	Epithelial Cell
Epithelial Cell;fraxetin;trt_cp;10 uM;24 h	4104	3	-9.31985	-6.31298	0.0234775	0.115042	fraxetin	trt_cp	10 uM	24 h	Epithelial Cell
Epithelial Cell;mycophenolate-mofetil;trt_cp;10 uM;24 h	4104	5	-7.48192	-2.87052	0.0452373	0.170313	mycophenolate-mofetil	trt_cp	10 uM	24 h	Epithelial Cell
Epithelial Cell;aliskiren;trt_cp;10 uM;24 h	4104	3	-9.11141	-4.85666	0.0392909	0.157213	aliskiren	trt_cp	10 uM	24 h	Epithelial Cell
Epithelial Cell;BRD-K26664453;trt_cp;10 uM;24 h	4104	5	6.96466	2.8868	0.044466	0.168682	BRD-K26664453	trt_cp	10 uM	24 h	Epithelial Cell
Epithelial Cell;linsitinib;trt_cp;10 uM;6 h	585	5	-5.21968	-4.74142	0.00382719	0.0340441	linsitinib	trt_cp	10 uM	6 h	Epithelial Cell
Epithelial Cell;atomoxetine;trt_cp;10 uM;24 h	4104	6	-2.0778	-1.13076	0.309083	0.509445	atomoxetine	trt_cp	10 uM	24 h	Epithelial Cell
Epithelial Cell;parthenolide;trt_cp;10 uM;6 h	585	11	-3.86618	-2.31356	0.0401036	0.159351	parthenolide	trt_cp	10 uM	6 h	Epithelial Cell
Epithelial Cell;BRD-K87657228;trt_cp;10 uM;24 h	4104	3	-7.94222	-3.03498	0.0931388	0.25774	BRD-K87657228	trt_cp	10 uM	24 h	Epithelial Cell
Epithelial Cell;W-9;trt_cp;10 uM;6 h	585	3	-2.78446	-1.04263	0.401698	0.592741	W-9	trt_cp	10 uM	6 h	Epithelial Cell
Epithelial Cell;BRL-37344;trt_cp;10 uM;24 h	4104	3	-10.0115	-2.69067	0.114592	0.289342	BRL-37344	trt_cp	10 uM	24 h	Epithelial Cell
Epithelial Cell;naftifine;trt_cp;10 uM;24 h	4104	6	-3.64914	-2.13077	0.0858285	0.246152	naftifine	trt_cp	10 uM	24 h	Epithelial Cell
Epithelial Cell;enalapril;trt_cp;10 uM;6 h	585	5	-5.16949	-4.66216	0.00419244	0.0364439	enalapril	trt_cp	10 uM	6 h	Epithelial Cell
Epithelial Cell;GR-55562;trt_cp;10 uM;6 h	585	3	-2.14424	-0.837963	0.4859	0.66105	GR-55562	trt_cp	10 uM	6 h	Epithelial Cell
Epithelial Cell;amsacrine;trt_cp;10 uM;24 h	4104	5	21.5009	9.0661	0.00080281	0.0103126	amsacrine	trt_cp	10 uM	24 h	Epithelial Cell
Epithelial Cell;pivmecillinam;trt_cp;10 uM;24 h	4104	3	-8.88345	-3.5131	0.0719155	0.222799	pivmecillinam	trt_cp	10 uM	24 h	Epithelial Cell
Epithelial Cell;IB-MECA;trt_cp;10 uM;6 h	585	5	-5.61458	-2.49497	0.0626156	0.205384	IB-MECA	trt_cp	10 uM	6 h	Epithelial Cell
Epithelial Cell;Y-27152;trt_cp;10 uM;6 h	585	3	-9.54609	-4.35318	0.0423208	0.164018	Y-27152	trt_cp	10 uM	6 h	Epithelial Cell
Epithelial Cell;nalbuphine;trt_cp;10 uM;24 h	4104	7	-4.03381	-1.77303	0.126343	0.305438	nalbuphine	trt_cp	10 uM	24 h	Epithelial Cell
Epithelial Cell;GR-32191;trt_cp;10 uM;24 h	4104	3	-3.42862	-0.985838	0.427947	0.614017	GR-32191	trt_cp	10 uM	24 h	Epithelial Cell
Epithelial Cell;bulleyaconitine-a;trt_cp;10 uM;24 h	4104	3	-7.3586	-2.72426	0.112032	0.285897	bulleyaconitine-a	trt_cp	10 uM	24 h	Epithelial Cell
Epithelial Cell;BML-190;trt_cp;10 uM;6 h	585	3	-6.06449	-3.36412	0.0661775	0.21209	BML-190	trt_cp	10 uM	6 h	Epithelial Cell
Epithelial Cell;potassium-canrenoate;trt_cp;10 uM;6 h	585	4	-7.09896	-4.58148	0.013585	0.081601	potassium-canrenoate	trt_cp	10 uM	6 h	Epithelial Cell
Epithelial Cell;FPL-55712;trt_cp;10 uM;24 h	4104	3	-6.63026	-3.17409	0.0858952	0.24618	FPL-55712	trt_cp	10 uM	24 h	Epithelial Cell
Epithelial Cell;BRL-54443;trt_cp;10 uM;6 h	585	3	2.25806	1.34367	0.296458	0.497703	BRL-54443	trt_cp	10 uM	6 h	Epithelial Cell
Epithelial Cell;coumestrol;trt_cp;10 uM;24 h	4104	3	-9.8686	-5.75732	0.0282836	0.128952	coumestrol	trt_cp	10 uM	24 h	Epithelial Cell
Epithelial Cell;herniarin;trt_cp;10 uM;6 h	585	3	0.365964	0.058695	0.958486	0.977549	herniarin	trt_cp	10 uM	6 h	Epithelial Cell
Epithelial Cell;BRD-K76674262;trt_cp;10 uM;6 h	585	3	4.88322	5.21955	0.0112527	0.0720624	BRD-K76674262	trt_cp	10 uM	6 h	Epithelial Cell
Epithelial Cell;clobenpropit;trt_cp;10 uM;6 h	585	4	-6.182	-1.86139	0.156496	0.345403	clobenpropit	trt_cp	10 uM	6 h	Epithelial Cell
Epithelial Cell;brimonidine;trt_cp;10 uM;24 h	4104	3	-3.78043	-4.77426	0.0378939	0.153693	brimonidine	trt_cp	10 uM	24 h	Epithelial Cell
Epithelial Cell;BRD-K12238169;trt_cp;10 uM;6 h	585	6	-1.94798	-1.04966	0.3371	0.535772	BRD-K12238169	trt_cp	10 uM	6 h	Epithelial Cell
Epithelial Cell;FU-JMBII127B;trt_cp;10 uM;24 h	4104	3	-0.34302	-0.158814	0.88833	0.938078	FU-JMBII127B	trt_cp	10 uM	24 h	Epithelial Cell
Epithelial Cell;ciprofibrate;trt_cp;10 uM;24 h	4104	3	-2.87464	-4.88225	0.0337828	0.144229	ciprofibrate	trt_cp	10 uM	24 h	Epithelial Cell
Epithelial Cell;forskolin;trt_cp;10 uM;24 h	4104	14	-6.62125	-4.13507	0.00114936	0.0137556	forskolin	trt_cp	10 uM	24 h	Epithelial Cell
Epithelial Cell;desoxypeganine;trt_cp;10 uM;6 h	585	3	-8.46528	-6.71651	0.0107533	0.070024	desoxypeganine	trt_cp	10 uM	6 h	Epithelial Cell
Epithelial Cell;KUC104547N;trt_cp;10 uM;6 h	585	3	5.42119	2.61176	0.110186	0.283383	KUC104547N	trt_cp	10 uM	6 h	Epithelial Cell
Epithelial Cell;CAM-9-027-3;trt_cp;10 uM;6 h	585	5	-3.60873	-2.58103	0.050377	0.180973	CAM-9-027-3	trt_cp	10 uM	6 h	Epithelial Cell
Epithelial Cell;prima-1-met;trt_cp;10 uM;6 h	585	5	-2.21094	-1.37005	0.233168	0.433112	prima-1-met	trt_cp	10 uM	6 h	Epithelial Cell
Epithelial Cell;EMF-BCA1-64;trt_cp;10 uM;6 h	585	5	-2.43202	-0.487021	0.651365	0.787033	EMF-BCA1-64	trt_cp	10 uM	6 h	Epithelial Cell
Neural Progenitor Cell;resveratrol;trt_cp;10 uM;24 h	1286	26	2.37678	0.799205	0.431524	0.617064	resveratrol	trt_cp	10 uM	24 h	Neural Progenitor Cell
Neural Progenitor Cell;BRD-K55242988;trt_cp;10 uM;6 h	73	3	-5.68821	-0.563074	0.627854	0.76938	BRD-K55242988	trt_cp	10 uM	6 h	Neural Progenitor Cell
Neural Progenitor Cell;tomelukast;trt_cp;10 uM;24 h	1286	5	13.8298	1.61831	0.180704	0.374254	tomelukast	trt_cp	10 uM	24 h	Neural Progenitor Cell
Neural Progenitor Cell;BRD-A48349196;trt_cp;10 uM;24 h	1286	5	1.86435	0.255083	0.811191	0.892821	BRD-A48349196	trt_cp	10 uM	24 h	Neural Progenitor Cell
Neural Progenitor Cell;BRD-M91737268;trt_cp;10 uM;6 h	73	5	-3.19964	-0.487204	0.649085	0.785136	BRD-M91737268	trt_cp	10 uM	6 h	Neural Progenitor Cell
Neural Progenitor Cell;butyrolactone;trt_cp;10 uM;6 h	73	4	6.13542	0.814059	0.47087	0.64907	butyrolactone	trt_cp	10 uM	6 h	Neural Progenitor Cell
Neural Progenitor Cell;NSC-3852;trt_cp;10 uM;6 h	73	4	7.10203	0.93153	0.415415	0.603978	NSC-3852	trt_cp	10 uM	6 h	Neural Progenitor Cell
Neural Progenitor Cell;sirtinol;trt_cp;10 uM;24 h	1286	6	9.98476	1.29221	0.252595	0.454195	sirtinol	trt_cp	10 uM	24 h	Neural Progenitor Cell
Neural Progenitor Cell;tolazamide;trt_cp;10 uM;24 h	1286	8	4.33695	0.713101	0.498733	0.670978	tolazamide	trt_cp	10 uM	24 h	Neural Progenitor Cell
Neural Progenitor Cell;SB-216763;trt_cp;10 uM;24 h	1286	17	4.81637	1.32422	0.203748	0.399964	SB-216763	trt_cp	10 uM	24 h	Neural Progenitor Cell
Neural Progenitor Cell;BRD-K51490254;trt_cp;10 uM;24 h	1286	3	13.6518	1.15223	0.368205	0.563366	BRD-K51490254	trt_cp	10 uM	24 h	Neural Progenitor Cell
Neural Progenitor Cell;BG-1012;trt_cp;10 uM;6 h	73	4	1.19458	0.179989	0.867538	0.926373	BG-1012	trt_cp	10 uM	6 h	Neural Progenitor Cell
Neural Progenitor Cell;LY-456236;trt_cp;10 uM;24 h	1286	8	-2.01803	-0.406633	0.696322	0.817668	LY-456236	trt_cp	10 uM	24 h	Neural Progenitor Cell
Neural Progenitor Cell;BRD-K97591839;trt_cp;10 uM;6 h	73	4	-4.44921	-0.598989	0.588192	0.739427	BRD-K97591839	trt_cp	10 uM	6 h	Neural Progenitor Cell
Adipose-derived Stem Cell;BRD-K55715339;trt_cp;10 uM;24 h	478	4	-6.68759	-2.10053	0.124915	0.303534	BRD-K55715339	trt_cp	10 uM	24 h	Adipose-derived Stem Cell
Neural Progenitor Cell;ambroxol;trt_cp;10 uM;24 h	1286	3	-9.38616	-4.69966	0.0382388	0.154369	ambroxol	trt_cp	10 uM	24 h	Neural Progenitor Cell
Adipose-derived Stem Cell;BRD-K09997269;trt_cp;10 uM;24 h	478	4	-7.69478	-5.06582	0.012244	0.0762479	BRD-K09997269	trt_cp	10 uM	24 h	Adipose-derived Stem Cell
Adipose-derived Stem Cell;nadolol;trt_cp;10 uM;24 h	478	5	-3.7005	-1.33397	0.251584	0.453264	nadolol	trt_cp	10 uM	24 h	Adipose-derived Stem Cell
Neural Progenitor Cell;BAS-02859604;trt_cp;10 uM;24 h	1286	3	-8.05986	-4.13671	0.0488169	0.177732	BAS-02859604	trt_cp	10 uM	24 h	Neural Progenitor Cell
Adipose-derived Stem Cell;L-750667;trt_cp;10 uM;24 h	478	4	-3.16433	-0.81426	0.474483	0.651658	L-750667	trt_cp	10 uM	24 h	Adipose-derived Stem Cell
Neural Progenitor Cell;nifurtimox;trt_cp;10 uM;24 h	1286	4	-10.6937	-13.5784	0.000101115	0.00205544	nifurtimox	trt_cp	10 uM	24 h	Neural Progenitor Cell
Adipose-derived Stem Cell;ZD-2079;trt_cp;10 uM;24 h	478	4	-4.2915	-1.42431	0.247875	0.449201	ZD-2079	trt_cp	10 uM	24 h	Adipose-derived Stem Cell
Adipose-derived Stem Cell;gefitinib;trt_cp;10 uM;24 h	478	4	-7.73598	-1.30003	0.284049	0.486454	gefitinib	trt_cp	10 uM	24 h	Adipose-derived Stem Cell
Epithelial Cell;BRD-A84280790;trt_cp;10 uM;6 h	585	3	-5.42865	-6.48908	0.00368063	0.0330689	BRD-A84280790	trt_cp	10 uM	6 h	Epithelial Cell
Epithelial Cell;NAN-190;trt_cp;10 uM;24 h	4104	3	-1.03014	-0.483754	0.676103	0.804181	NAN-190	trt_cp	10 uM	24 h	Epithelial Cell
Epithelial Cell;lavendustin-a;trt_cp;10 uM;6 h	585	3	-3.92407	-1.19069	0.352362	0.549575	lavendustin-a	trt_cp	10 uM	6 h	Epithelial Cell
Epithelial Cell;maraviroc;trt_cp;10 uM;24 h	4104	3	-3.55257	-3.00581	0.0930048	0.257505	maraviroc	trt_cp	10 uM	24 h	Epithelial Cell
Epithelial Cell;JNJ-10191584;trt_cp;10 uM;24 h	4104	3	-7.87994	-3.53662	0.0709369	0.221052	JNJ-10191584	trt_cp	10 uM	24 h	Epithelial Cell
Epithelial Cell;PD-102807;trt_cp;10 uM;24 h	4104	3	-4.48576	-5.08963	0.0340086	0.14491	PD-102807	trt_cp	10 uM	24 h	Epithelial Cell
Epithelial Cell;moexipril;trt_cp;10 uM;6 h	585	3	-2.51476	-1.20303	0.343146	0.541244	moexipril	trt_cp	10 uM	6 h	Epithelial Cell
Epithelial Cell;norketamine;trt_cp;10 uM;6 h	585	3	-4.61047	-4.91727	0.0134906	0.0812016	norketamine	trt_cp	10 uM	6 h	Epithelial Cell
Epithelial Cell;buphenine;trt_cp;10 uM;6 h	585	3	-5.01094	-1.43529	0.284106	0.486483	buphenine	trt_cp	10 uM	6 h	Epithelial Cell
Epithelial Cell;BRD-K00863322;trt_cp;10 uM;6 h	585	3	-0.464176	-0.153864	0.891326	0.93982	BRD-K00863322	trt_cp	10 uM	6 h	Epithelial Cell
Epithelial Cell;desmethylclozapine;trt_cp;10 uM;24 h	4104	3	-6.91603	-8.03823	0.0136195	0.0817022	desmethylclozapine	trt_cp	10 uM	24 h	Epithelial Cell
Epithelial Cell;sonidegib;trt_cp;10 uM;24 h	4104	8	-4.41039	-2.20247	0.0632516	0.206481	sonidegib	trt_cp	10 uM	24 h	Epithelial Cell
Epithelial Cell;AM-580;trt_cp;10 uM;24 h	4104	7	-1.92931	-0.522105	0.620269	0.763423	AM-580	trt_cp	10 uM	24 h	Epithelial Cell
Epithelial Cell;benzonatate;trt_cp;10 uM;6 h	585	3	-8.43736	-2.99481	0.0903713	0.253433	benzonatate	trt_cp	10 uM	6 h	Epithelial Cell
Epithelial Cell;AG-490;trt_cp;10 uM;6 h	585	5	-6.82533	-5.7352	0.00184343	0.0198025	AG-490	trt_cp	10 uM	6 h	Epithelial Cell
Epithelial Cell;bucladesine;trt_cp;10 uM;6 h	585	14	-5.49499	-3.51631	0.00304878	0.0289092	bucladesine	trt_cp	10 uM	6 h	Epithelial Cell
Epithelial Cell;deguelin;trt_cp;10 uM;24 h	4104	8	1.51521	0.586162	0.576101	0.730624	deguelin	trt_cp	10 uM	24 h	Epithelial Cell
Epithelial Cell;terconazole;trt_cp;10 uM;24 h	4104	3	-7.65514	-11.8477	0.00555509	0.0446952	terconazole	trt_cp	10 uM	24 h	Epithelial Cell
Epithelial Cell;beta-CCP;trt_cp;10 uM;24 h	4104	3	-9.4449	-8.9976	0.0112486	0.0720624	beta-CCP	trt_cp	10 uM	24 h	Epithelial Cell
Epithelial Cell;mometasone;trt_cp;10 uM;6 h	585	3	-3.69756	-3.15672	0.05932	0.1991	mometasone	trt_cp	10 uM	6 h	Epithelial Cell
Epithelial Cell;FPL-55712;trt_cp;10 uM;6 h	585	3	-3.07015	-1.20298	0.346077	0.543951	FPL-55712	trt_cp	10 uM	6 h	Epithelial Cell
Epithelial Cell;MK-2206;trt_cp;10 uM;24 h	4104	12	4.2839	2.50458	0.0290958	0.131196	MK-2206	trt_cp	10 uM	24 h	Epithelial Cell
Epithelial Cell;BRD-K92317137;trt_cp;10 uM;6 h	585	5	-1.90365	-1.0352	0.353143	0.550351	BRD-K92317137	trt_cp	10 uM	6 h	Epithelial Cell
Epithelial Cell;NU-7026;trt_cp;10 uM;24 h	4104	5	-10.854	-8.66746	0.000904023	0.0113362	NU-7026	trt_cp	10 uM	24 h	Epithelial Cell
Epithelial Cell;celecoxib;trt_cp;10 uM;24 h	4104	9	-5.10939	-3.30482	0.0106164	0.0694593	celecoxib	trt_cp	10 uM	24 h	Epithelial Cell
Epithelial Cell;BRD-A19037878;trt_cp;10 uM;24 h	4104	58	4.21687	3.90711	0.000245576	0.00405311	BRD-A19037878	trt_cp	10 uM	24 h	Epithelial Cell
Epithelial Cell;olopatadine;trt_cp;10 uM;6 h	585	3	-0.46621	-0.212291	0.850208	0.916108	olopatadine	trt_cp	10 uM	6 h	Epithelial Cell
Epithelial Cell;BRD-K47917680;trt_cp;10 uM;6 h	585	3	3.737	0.841763	0.487077	0.662042	BRD-K47917680	trt_cp	10 uM	6 h	Epithelial Cell
Epithelial Cell;BRD-K04676863;trt_cp;10 uM;6 h	585	3	4.33276	1.17687	0.357501	0.554717	BRD-K04676863	trt_cp	10 uM	6 h	Epithelial Cell
Epithelial Cell;BRD-K91134378;trt_cp;10 uM;6 h	585	3	0.867448	0.405157	0.721782	0.835658	BRD-K91134378	trt_cp	10 uM	6 h	Epithelial Cell
Epithelial Cell;KU-C104255;trt_cp;10 uM;6 h	585	3	5.79317	1.53118	0.262252	0.464457	KU-C104255	trt_cp	10 uM	6 h	Epithelial Cell
Epithelial Cell;phenethyl-isothiocyanate;trt_cp;10 uM;6 h	585	5	-3.16385	-1.78817	0.139876	0.324252	phenethyl-isothiocyanate	trt_cp	10 uM	6 h	Epithelial Cell
Neural Progenitor Cell;BRD-K18436203;trt_cp;10 uM;6 h	73	3	-11.6476	-4.66795	0.00551239	0.0444799	BRD-K18436203	trt_cp	10 uM	6 h	Neural Progenitor Cell
Neural Progenitor Cell;hydroxytyrosol;trt_cp;10 uM;6 h	73	3	-10.1141	-4.18768	0.00726267	0.0538045	hydroxytyrosol	trt_cp	10 uM	6 h	Neural Progenitor Cell
Neural Progenitor Cell;imatinib;trt_cp;10 uM;6 h	73	8	5.5546	0.819516	0.436946	0.621592	imatinib	trt_cp	10 uM	6 h	Neural Progenitor Cell
Neural Progenitor Cell;reboxetine;trt_cp;10 uM;24 h	1286	7	3.95981	0.654758	0.536767	0.700871	reboxetine	trt_cp	10 uM	24 h	Neural Progenitor Cell
Neural Progenitor Cell;BRD-A77864279;trt_cp;10 uM;24 h	1286	4	8.63219	0.888912	0.439399	0.623936	BRD-A77864279	trt_cp	10 uM	24 h	Neural Progenitor Cell
Neural Progenitor Cell;riluzole;trt_cp;10 uM;24 h	1286	21	10.9313	3.93683	0.000781143	0.0101036	riluzole	trt_cp	10 uM	24 h	Neural Progenitor Cell
Adipose-derived Stem Cell;BRD-K70974948;trt_cp;10 uM;24 h	478	4	0.880351	0.337065	0.757736	0.858807	BRD-K70974948	trt_cp	10 uM	24 h	Adipose-derived Stem Cell
Adipose-derived Stem Cell;BRD-K16541732;trt_cp;10 uM;24 h	478	3	-7.13695	-2.31198	0.14459	0.33007	BRD-K16541732	trt_cp	10 uM	24 h	Adipose-derived Stem Cell
Adipose-derived Stem Cell;T-0070907;trt_cp;10 uM;24 h	478	3	-0.785301	-0.12728	0.910313	0.951054	T-0070907	trt_cp	10 uM	24 h	Adipose-derived Stem Cell
Neural Progenitor Cell;ioxaglic-acid;trt_cp;10 uM;24 h	1286	4	-7.59935	-12.1267	3.21202e-05	0.000821182	ioxaglic-acid	trt_cp	10 uM	24 h	Neural Progenitor Cell
Adipose-derived Stem Cell;tetrahydropalmatine;trt_cp;10 uM;24 h	478	3	-4.74767	-0.805407	0.504745	0.675735	tetrahydropalmatine	trt_cp	10 uM	24 h	Adipose-derived Stem Cell
Adipose-derived Stem Cell;felbamate;trt_cp;10 uM;24 h	478	4	-6.21245	-1.47602	0.235541	0.435827	felbamate	trt_cp	10 uM	24 h	Adipose-derived Stem Cell
Adipose-derived Stem Cell;prednisolone-acetate;trt_cp;10 uM;24 h	478	4	-8.95429	-2.58401	0.080277	0.237044	prednisolone-acetate	trt_cp	10 uM	24 h	Adipose-derived Stem Cell
Adipose-derived Stem Cell;benperidol;trt_cp;10 uM;24 h	478	3	-3.08952	-0.863679	0.477708	0.654184	benperidol	trt_cp	10 uM	24 h	Adipose-derived Stem Cell
Adipose-derived Stem Cell;reboxetine;trt_cp;10 uM;24 h	478	4	-5.4113	-1.42322	0.248786	0.450104	reboxetine	trt_cp	10 uM	24 h	Adipose-derived Stem Cell
Adipose-derived Stem Cell;T-0901317;trt_cp;10 uM;24 h	478	4	-2.52511	-2.38083	0.0843868	0.243839	T-0901317	trt_cp	10 uM	24 h	Adipose-derived Stem Cell
Adipose-derived Stem Cell;SB-222200;trt_cp;10 uM;24 h	478	3	-2.79677	-1.52672	0.260056	0.462461	SB-222200	trt_cp	10 uM	24 h	Adipose-derived Stem Cell
Adipose-derived Stem Cell;methocarbamol;trt_cp;10 uM;24 h	478	3	-1.30073	-0.320377	0.778768	0.872535	methocarbamol	trt_cp	10 uM	24 h	Adipose-derived Stem Cell
Adipose-derived Stem Cell;WZ-4-145;trt_cp;10 uM;24 h	478	3	-5.62971	-1.65458	0.237943	0.43876	WZ-4-145	trt_cp	10 uM	24 h	Adipose-derived Stem Cell
Adipose-derived Stem Cell;scoulerine;trt_cp;10 uM;24 h	478	3	-5.04863	-2.38115	0.13528	0.317571	scoulerine	trt_cp	10 uM	24 h	Adipose-derived Stem Cell
Adipose-derived Stem Cell;GSK-429286A;trt_cp;10 uM;24 h	478	8	3.3312	2.07701	0.0737137	0.225863	GSK-429286A	trt_cp	10 uM	24 h	Adipose-derived Stem Cell
Neural Progenitor Cell;BRD-A57300602;trt_cp;10 uM;24 h	1286	3	-5.41747	-1.41675	0.290604	0.492514	BRD-A57300602	trt_cp	10 uM	24 h	Neural Progenitor Cell
Neural Progenitor Cell;C646;trt_cp;10 uM;""	36	32	3.44986	3.26569	0.00177944	0.0192692	C646	trt_cp	10 uM		Neural Progenitor Cell
Neural Progenitor Cell;BRD-K36162096;trt_cp;10 uM;6 h	73	4	-1.08004	-0.110651	0.918568	0.955467	BRD-K36162096	trt_cp	10 uM	6 h	Neural Progenitor Cell
Neural Progenitor Cell;SMER-28;trt_cp;10 uM;24 h	1286	4	12.4478	1.38142	0.260839	0.463182	SMER-28	trt_cp	10 uM	24 h	Neural Progenitor Cell
Neural Progenitor Cell;BRD-K35923252;trt_cp;10 uM;24 h	1286	3	28.161	2.55869	0.124575	0.30313	BRD-K35923252	trt_cp	10 uM	24 h	Neural Progenitor Cell
Neural Progenitor Cell;BRD-M28563253;trt_cp;10 uM;24 h	1286	4	9.60049	0.86163	0.45216	0.634244	BRD-M28563253	trt_cp	10 uM	24 h	Neural Progenitor Cell
Neural Progenitor Cell;kaempferol;trt_cp;10 uM;24 h	1286	4	7.48763	0.822729	0.470824	0.649065	kaempferol	trt_cp	10 uM	24 h	Neural Progenitor Cell
Neural Progenitor Cell;rifampicin;trt_cp;10 uM;24 h	1286	8	3.28787	0.608559	0.561903	0.719911	rifampicin	trt_cp	10 uM	24 h	Neural Progenitor Cell
Neural Progenitor Cell;exifone;trt_cp;10 uM;24 h	1286	3	21.2505	1.73994	0.223822	0.423248	exifone	trt_cp	10 uM	24 h	Neural Progenitor Cell
Neural Progenitor Cell;BRD-K05396879;trt_cp;10 uM;24 h	1286	7	8.76335	1.31104	0.237568	0.4383	BRD-K05396879	trt_cp	10 uM	24 h	Neural Progenitor Cell
Neural Progenitor Cell;BRD-K43631199;trt_cp;10 uM;24 h	1286	3	17.2724	2.00165	0.182921	0.376489	BRD-K43631199	trt_cp	10 uM	24 h	Neural Progenitor Cell
Neural Progenitor Cell;rilmenidine;trt_cp;10 uM;24 h	1286	7	1.63625	0.251024	0.810131	0.892382	rilmenidine	trt_cp	10 uM	24 h	Neural Progenitor Cell
Neural Progenitor Cell;thalidomide;trt_cp;10 uM;6 h	73	3	-13.2969	-6.98059	6.8225e-06	0.000233362	thalidomide	trt_cp	10 uM	6 h	Neural Progenitor Cell
Neural Progenitor Cell;phenothiazine;trt_cp;10 uM;6 h	73	5	0.0630578	0.00873427	0.993415	0.996758	phenothiazine	trt_cp	10 uM	6 h	Neural Progenitor Cell
Neural Progenitor Cell;BRD-K31344914;trt_cp;10 uM;24 h	1286	4	3.18529	0.351122	0.748654	0.852747	BRD-K31344914	trt_cp	10 uM	24 h	Neural Progenitor Cell
Neural Progenitor Cell;BRD-K43807558;trt_cp;10 uM;24 h	1286	3	13.2577	1.29757	0.323712	0.52351	BRD-K43807558	trt_cp	10 uM	24 h	Neural Progenitor Cell
Neural Progenitor Cell;BRD-A42994615;trt_cp;10 uM;6 h	73	3	-1.70368	-0.14853	0.895127	0.94215	BRD-A42994615	trt_cp	10 uM	6 h	Neural Progenitor Cell
Neural Progenitor Cell;paxilline;trt_cp;10 uM;24 h	1286	4	9.37555	1.02056	0.38242	0.575098	paxilline	trt_cp	10 uM	24 h	Neural Progenitor Cell
Neural Progenitor Cell;hydroxychloroquine;trt_cp;10 uM;24 h	1286	3	13.8773	1.26093	0.334313	0.533244	hydroxychloroquine	trt_cp	10 uM	24 h	Neural Progenitor Cell
Neural Progenitor Cell;dantron;trt_cp;10 uM;24 h	1286	3	-7.95674	-3.73394	0.0602975	0.200913	dantron	trt_cp	10 uM	24 h	Neural Progenitor Cell
Neural Progenitor Cell;mexiletine;trt_cp;10 uM;24 h	1286	3	-8.59476	-5.42683	0.0267312	0.124371	mexiletine	trt_cp	10 uM	24 h	Neural Progenitor Cell
Adipose-derived Stem Cell;ST-4075437;trt_cp;10 uM;24 h	478	4	-6.14004	-1.96609	0.142326	0.327325	ST-4075437	trt_cp	10 uM	24 h	Adipose-derived Stem Cell
Neural Progenitor Cell;aminogenistein;trt_cp;10 uM;24 h	1286	3	-9.73699	-5.74279	0.0244105	0.117585	aminogenistein	trt_cp	10 uM	24 h	Neural Progenitor Cell
Adipose-derived Stem Cell;sorafenib;trt_cp;10 uM;24 h	478	7	-6.01422	-3.11604	0.0194192	0.102376	sorafenib	trt_cp	10 uM	24 h	Adipose-derived Stem Cell
Adipose-derived Stem Cell;GR-113808;trt_cp;10 uM;24 h	478	4	-10.1884	-3.26239	0.0458273	0.17164	GR-113808	trt_cp	10 uM	24 h	Adipose-derived Stem Cell
Neural Progenitor Cell;modafinil;trt_cp;10 uM;24 h	1286	4	-9.18712	-7.64313	0.00268941	0.026353	modafinil	trt_cp	10 uM	24 h	Neural Progenitor Cell
Adipose-derived Stem Cell;BRD-K33606495;trt_cp;10 uM;24 h	478	4	-1.403	-1.01415	0.379003	0.571845	BRD-K33606495	trt_cp	10 uM	24 h	Adipose-derived Stem Cell
Adipose-derived Stem Cell;BRD-K08799950;trt_cp;10 uM;24 h	478	4	-4.40151	-1.48041	0.233581	0.433646	BRD-K08799950	trt_cp	10 uM	24 h	Adipose-derived Stem Cell
Adipose-derived Stem Cell;BRD-K05396879;trt_cp;10 uM;24 h	478	7	-7.27254	-3.13719	0.0192656	0.101804	BRD-K05396879	trt_cp	10 uM	24 h	Adipose-derived Stem Cell
Adipose-derived Stem Cell;BRD-K84571636;trt_cp;10 uM;24 h	478	3	-4.8746	-2.45175	0.128215	0.308187	BRD-K84571636	trt_cp	10 uM	24 h	Adipose-derived Stem Cell
Adipose-derived Stem Cell;piceatannol;trt_cp;10 uM;24 h	478	7	-0.712616	-0.231948	0.824147	0.900162	piceatannol	trt_cp	10 uM	24 h	Adipose-derived Stem Cell
Adipose-derived Stem Cell;enzastaurin;trt_cp;10 uM;24 h	478	4	-8.22842	-2.41266	0.0934797	0.258275	enzastaurin	trt_cp	10 uM	24 h	Adipose-derived Stem Cell
Adipose-derived Stem Cell;BRD-K82837433;trt_cp;10 uM;24 h	478	4	-7.2969	-3.30939	0.0430243	0.16579	BRD-K82837433	trt_cp	10 uM	24 h	Adipose-derived Stem Cell
Adipose-derived Stem Cell;dacinostat;trt_cp;10 uM;24 h	478	6	-10.3905	-3.59292	0.0150967	0.0871585	dacinostat	trt_cp	10 uM	24 h	Adipose-derived Stem Cell
Adipose-derived Stem Cell;BRD-K29345712;trt_cp;10 uM;24 h	478	3	-6.09835	-2.70227	0.109814	0.28304	BRD-K29345712	trt_cp	10 uM	24 h	Adipose-derived Stem Cell
Neural Progenitor Cell;dexamethasone;trt_cp;10 uM;24 h	1286	12	-1.03968	-0.268828	0.792969	0.882247	dexamethasone	trt_cp	10 uM	24 h	Neural Progenitor Cell
Neural Progenitor Cell;coumestrol;trt_cp;10 uM;24 h	1286	3	-7.33792	-7.66128	0.00799163	0.0573555	coumestrol	trt_cp	10 uM	24 h	Neural Progenitor Cell
Neural Progenitor Cell;GW-441756;trt_cp;10 uM;24 h	1286	4	-7.97732	-4.16121	0.0225335	0.111988	GW-441756	trt_cp	10 uM	24 h	Neural Progenitor Cell
Neural Progenitor Cell;ICI-162846;trt_cp;10 uM;24 h	1286	3	-5.02402	-4.12337	0.0418847	0.163016	ICI-162846	trt_cp	10 uM	24 h	Neural Progenitor Cell
Adipose-derived Stem Cell;BRD-K63587518;trt_cp;10 uM;24 h	478	3	-7.45165	-2.15111	0.162523	0.352319	BRD-K63587518	trt_cp	10 uM	24 h	Adipose-derived Stem Cell
Adipose-derived Stem Cell;BRD-A41114263;trt_cp;10 uM;24 h	478	4	-4.99648	-1.43511	0.245486	0.446305	BRD-A41114263	trt_cp	10 uM	24 h	Adipose-derived Stem Cell
Neural Progenitor Cell;EMF-sumo1-5;trt_cp;10 uM;24 h	1286	3	-7.92058	-2.34758	0.141113	0.32589	EMF-sumo1-5	trt_cp	10 uM	24 h	Neural Progenitor Cell
Neural Progenitor Cell;cyproterone;trt_cp;10 uM;24 h	1286	3	-9.39527	-5.7579	0.0239335	0.116183	cyproterone	trt_cp	10 uM	24 h	Neural Progenitor Cell
Epithelial Cell;isonicotinohydroxamic-acid;trt_cp;10 uM;24 h	4104	11	22.8938	5.85896	0.000158586	0.00290268	isonicotinohydroxamic-acid	trt_cp	10 uM	24 h	Epithelial Cell
Epithelial Cell;panobinostat;trt_cp;10 uM;24 h	4104	9	18.7719	5.21175	0.000805484	0.0103343	panobinostat	trt_cp	10 uM	24 h	Epithelial Cell
Fibroblast;BX-795;trt_cp;10 uM;24 h	329	9	9.28898	3.31452	0.00957531	0.0646931	BX-795	trt_cp	10 uM	24 h	Fibroblast
Epithelial Cell;omeprazole;trt_cp;10 uM;6 h	585	7	5.83315	1.10494	0.31097	0.511468	omeprazole	trt_cp	10 uM	6 h	Epithelial Cell
Fibroblast;BRD-K67808578;trt_cp;10 uM;24 h	329	11	4.58213	1.71276	0.115143	0.290208	BRD-K67808578	trt_cp	10 uM	24 h	Fibroblast
Fibroblast;pioglitazone;trt_cp;10 uM;24 h	329	11	4.40413	1.53082	0.154744	0.34341	pioglitazone	trt_cp	10 uM	24 h	Fibroblast
Fibroblast;elesclomol;trt_cp;10 uM;24 h	329	12	4.85755	1.7267	0.110186	0.283383	elesclomol	trt_cp	10 uM	24 h	Fibroblast
Fibroblast;vecuronium;trt_cp;10 uM;24 h	329	12	-0.500777	-0.130461	0.898467	0.943901	vecuronium	trt_cp	10 uM	24 h	Fibroblast
Fibroblast;BRD-A77577770;trt_cp;10 uM;24 h	329	12	0.998558	0.303352	0.76699	0.864916	BRD-A77577770	trt_cp	10 uM	24 h	Fibroblast
Epithelial Cell;BRD-U37528018;trt_cp;10 uM;6 h	585	3	21.7662	4.86474	0.0382859	0.154502	BRD-U37528018	trt_cp	10 uM	6 h	Epithelial Cell
Epithelial Cell;BRD-K69101489;trt_cp;10 uM;24 h	4104	3	8.88203	5.49189	0.0309005	0.136266	BRD-K69101489	trt_cp	10 uM	24 h	Epithelial Cell
Fibroblast;masitinib;trt_cp;10 uM;24 h	329	12	1.74913	0.87427	0.398125	0.589441	masitinib	trt_cp	10 uM	24 h	Fibroblast
Epithelial Cell;BRD-K95682488;trt_cp;10 uM;24 h	4104	3	1.72472	1.9636	0.184245	0.378026	BRD-K95682488	trt_cp	10 uM	24 h	Epithelial Cell
Epithelial Cell;BRD-K66616402;trt_cp;10 uM;24 h	4104	3	-2.95378	-0.998375	0.423007	0.610012	BRD-K66616402	trt_cp	10 uM	24 h	Epithelial Cell
Epithelial Cell;BRD-K21517000;trt_cp;10 uM;24 h	4104	3	2.2287	5.33087	0.0236418	0.115504	BRD-K21517000	trt_cp	10 uM	24 h	Epithelial Cell
Neural Progenitor Cell;ABT-737;trt_cp;10 uM;24 h	1286	9	-8.94774	-14.2238	4.97592e-10	5.6905e-08	ABT-737	trt_cp	10 uM	24 h	Neural Progenitor Cell
Neural Progenitor Cell;anacardic-acid;trt_cp;10 uM;24 h	1286	13	-1.27681	-0.327213	0.749068	0.853024	anacardic-acid	trt_cp	10 uM	24 h	Neural Progenitor Cell
Neural Progenitor Cell;GSK-1059615;trt_cp;10 uM;24 h	1286	22	-8.37497	-9.71189	1.5586e-10	2.01596e-08	GSK-1059615	trt_cp	10 uM	24 h	Neural Progenitor Cell
Neural Progenitor Cell;KI-20227;trt_cp;10 uM;24 h	1286	9	-5.61267	-4.22993	0.00218279	0.0225527	KI-20227	trt_cp	10 uM	24 h	Neural Progenitor Cell
Bone Marrow Stem Cell;GSK-1059615;trt_cp;10 uM;24 h	331	20	1.28647	1.10339	0.281067	0.483747	GSK-1059615	trt_cp	10 uM	24 h	Bone Marrow Stem Cell
Neural Progenitor Cell;SGX-523;trt_cp;10 uM;24 h	1286	9	-6.98719	-6.54446	7.50507e-05	0.0016219	SGX-523	trt_cp	10 uM	24 h	Neural Progenitor Cell
Epithelial Cell;fenretinide;trt_cp;10 uM;24 h	4104	5	-0.383733	-0.26254	0.805721	0.889465	fenretinide	trt_cp	10 uM	24 h	Epithelial Cell
Bone Marrow Stem Cell;veliparib;trt_cp;10 uM;24 h	331	10	0.327235	0.148205	0.885273	0.936633	veliparib	trt_cp	10 uM	24 h	Bone Marrow Stem Cell
Neural Progenitor Cell;KIN001-055;trt_cp;10 uM;24 h	1286	8	-8.74969	-9.22641	7.14542e-06	0.000241568	KIN001-055	trt_cp	10 uM	24 h	Neural Progenitor Cell
Neural Progenitor Cell;CX-5461;trt_cp;10 uM;24 h	1286	9	-0.952802	-0.831494	0.426212	0.612716	CX-5461	trt_cp	10 uM	24 h	Neural Progenitor Cell
Epithelial Cell;BRD-K93367411;trt_cp;10 uM;24 h	4104	6	-3.18475	-1.5874	0.172907	0.365037	BRD-K93367411	trt_cp	10 uM	24 h	Epithelial Cell
HSC;D-4476;trt_cp;10 uM;24 h	179	3	2.23633	0.618808	0.598175	0.74674	D-4476	trt_cp	10 uM	24 h	HSC
Epithelial Cell;PF-573228;trt_cp;10 uM;24 h	4104	4	-6.63175	-1.66823	0.19371	0.3885	PF-573228	trt_cp	10 uM	24 h	Epithelial Cell
Endothelial Cell;dacomitinib;trt_cp;10 uM;24 h	569	3	5.76227	3.68731	0.063142	0.20632	dacomitinib	trt_cp	10 uM	24 h	Endothelial Cell
Neural Stem Cell;vorinostat;trt_cp;10 uM;24 h	46	3	12.405	4.10113	0.0420536	0.163436	vorinostat	trt_cp	10 uM	24 h	Neural Stem Cell
Epithelial Cell;ofloxacin;trt_cp;10 uM;24 h	4104	3	-10.1535	-6.28452	0.0238019	0.115855	ofloxacin	trt_cp	10 uM	24 h	Epithelial Cell
Fibroblast;CAY-10577;trt_cp;10 uM;24 h	329	11	1.92574	0.546286	0.596309	0.745163	CAY-10577	trt_cp	10 uM	24 h	Fibroblast
Fibroblast;rifabutin;trt_cp;10 uM;24 h	329	11	2.33098	0.66514	0.520324	0.687931	rifabutin	trt_cp	10 uM	24 h	Fibroblast
Fibroblast;BRD-K79437791;trt_cp;10 uM;24 h	329	12	1.36205	0.50583	0.622196	0.764996	BRD-K79437791	trt_cp	10 uM	24 h	Fibroblast
Fibroblast;mifepristone;trt_cp;10 uM;24 h	329	12	1.24039	0.411464	0.688152	0.812037	mifepristone	trt_cp	10 uM	24 h	Fibroblast
Fibroblast;cholic-acid;trt_cp;10 uM;24 h	329	12	2.82377	0.748932	0.468995	0.647738	cholic-acid	trt_cp	10 uM	24 h	Fibroblast
Fibroblast;MK-2206;trt_cp;10 uM;24 h	329	12	7.05202	2.49536	0.0283977	0.129267	MK-2206	trt_cp	10 uM	24 h	Fibroblast
Fibroblast;tenofovir;trt_cp;10 uM;24 h	329	12	3.38294	1.36862	0.195973	0.391169	tenofovir	trt_cp	10 uM	24 h	Fibroblast
Epithelial Cell;BRD-A20239487;trt_cp;10 uM;6 h	585	6	6.75612	1.52601	0.186432	0.380632	BRD-A20239487	trt_cp	10 uM	6 h	Epithelial Cell
Fibroblast;KI-8751;trt_cp;10 uM;24 h	329	11	3.60393	1.13275	0.282309	0.485024	KI-8751	trt_cp	10 uM	24 h	Fibroblast
Neural Progenitor Cell;943;trt_cp;10 uM;""	36	33	-0.664024	-0.645591	0.520828	0.688295	943	trt_cp	10 uM		Neural Progenitor Cell
Epithelial Cell;palbociclib;trt_cp;10 uM;24 h	4104	6	1.97042	0.735313	0.495056	0.668122	palbociclib	trt_cp	10 uM	24 h	Epithelial Cell
Epithelial Cell;BRD-K97101742;trt_cp;10 uM;24 h	4104	3	3.61288	2.29479	0.147347	0.333579	BRD-K97101742	trt_cp	10 uM	24 h	Epithelial Cell
Epithelial Cell;BRD-K92543914;trt_cp;10 uM;24 h	4104	6	7.73803	3.55918	0.0160777	0.0910495	BRD-K92543914	trt_cp	10 uM	24 h	Epithelial Cell
Epithelial Cell;BRD-K58945843;trt_cp;10 uM;24 h	4104	3	3.87898	3.5127	0.0701307	0.219421	BRD-K58945843	trt_cp	10 uM	24 h	Epithelial Cell
Epithelial Cell;BRD-K19294102;trt_cp;10 uM;24 h	4104	3	5.70743	12.2038	0.00412125	0.0360615	BRD-K19294102	trt_cp	10 uM	24 h	Epithelial Cell
Epithelial Cell;BRD-A02303741;trt_cp;10 uM;24 h	4104	3	-4.82764	-3.40451	0.0751228	0.228092	BRD-A02303741	trt_cp	10 uM	24 h	Epithelial Cell
Bone Marrow Stem Cell;NVP-TAE226;trt_cp;10 uM;24 h	331	4	4.4318	2.04075	0.128774	0.30893	NVP-TAE226	trt_cp	10 uM	24 h	Bone Marrow Stem Cell
Neural Progenitor Cell;GSK-J4;trt_cp;10 uM;24 h	1286	9	-5.2395	-3.61732	0.00573889	0.0456744	GSK-J4	trt_cp	10 uM	24 h	Neural Progenitor Cell
Adipose-derived Stem Cell;iniparib;trt_cp;10 uM;24 h	478	4	-0.583777	-0.216435	0.842216	0.911266	iniparib	trt_cp	10 uM	24 h	Adipose-derived Stem Cell
Epithelial Cell;BRD-K38028643;trt_cp;10 uM;24 h	4104	3	-3.73005	-3.62832	0.0657673	0.211397	BRD-K38028643	trt_cp	10 uM	24 h	Epithelial Cell
Adipose-derived Stem Cell;JQ-1-R;trt_cp;10 uM;24 h	478	3	3.37674	1.1905	0.353706	0.550933	JQ-1-R	trt_cp	10 uM	24 h	Adipose-derived Stem Cell
Neural Progenitor Cell;BRD-K68336408;trt_cp;10 uM;24 h	1286	8	-7.64239	-11.5604	6.72346e-08	4.44703e-06	BRD-K68336408	trt_cp	10 uM	24 h	Neural Progenitor Cell
Epithelial Cell;vorinostat;trt_cp;10 uM;24 h	4104	82	4.31298	4.71464	9.57172e-06	0.000306392	vorinostat	trt_cp	10 uM	24 h	Epithelial Cell
Bone Marrow Stem Cell;MGCD-265;trt_cp;10 uM;24 h	331	6	1.92781	1.23087	0.267544	0.46972	MGCD-265	trt_cp	10 uM	24 h	Bone Marrow Stem Cell
Epithelial Cell;tanespimycin;trt_cp;10 uM;24 h	4104	53	1.20531	1.40297	0.166362	0.357003	tanespimycin	trt_cp	10 uM	24 h	Epithelial Cell
HSC;vorinostat;trt_cp;10 uM;24 h	179	10	9.21198	4.88767	0.000713892	0.00941545	vorinostat	trt_cp	10 uM	24 h	HSC
Neural Progenitor Cell;IOX2;trt_cp;10 uM;24 h	1286	8	-7.60985	-6.40841	0.000189474	0.00334023	IOX2	trt_cp	10 uM	24 h	Neural Progenitor Cell
Adipose-derived Stem Cell;saracatinib;trt_cp;10 uM;24 h	478	7	1.90718	0.623084	0.555738	0.715182	saracatinib	trt_cp	10 uM	24 h	Adipose-derived Stem Cell
Epithelial Cell;mitoxantrone;trt_cp;10 uM;24 h	4104	33	9.23547	7.50952	1.34375e-08	1.07141e-06	mitoxantrone	trt_cp	10 uM	24 h	Epithelial Cell
Neural Progenitor Cell;BRD-K93023739;trt_cp;10 uM;6 h	73	3	-8.90387	-3.35655	0.0246051	0.118131	BRD-K93023739	trt_cp	10 uM	6 h	Neural Progenitor Cell
Epithelial Cell;benzbromarone;trt_cp;10 uM;24 h	4104	6	-2.75758	-1.33493	0.239121	0.439737	benzbromarone	trt_cp	10 uM	24 h	Epithelial Cell
Epithelial Cell;calpeptin;trt_cp;10 uM;24 h	4104	7	-5.30062	-3.29409	0.0162865	0.0917228	calpeptin	trt_cp	10 uM	24 h	Epithelial Cell
Neural Progenitor Cell;H-9;trt_cp;10 uM;24 h	1286	4	-8.79593	-6.92599	0.00394142	0.0348207	H-9	trt_cp	10 uM	24 h	Neural Progenitor Cell
Adipose-derived Stem Cell;BRD-K14441456;trt_cp;10 uM;24 h	478	4	-10.2731	-1.40127	0.255382	0.457172	BRD-K14441456	trt_cp	10 uM	24 h	Adipose-derived Stem Cell
Adipose-derived Stem Cell;BRD-K30715099;trt_cp;10 uM;24 h	478	4	0.676577	0.23422	0.829591	0.90345	BRD-K30715099	trt_cp	10 uM	24 h	Adipose-derived Stem Cell
Adipose-derived Stem Cell;BRL-37344;trt_cp;10 uM;24 h	478	3	-8.48255	-1.6696	0.236094	0.436457	BRL-37344	trt_cp	10 uM	24 h	Adipose-derived Stem Cell
Adipose-derived Stem Cell;BE-2254;trt_cp;10 uM;24 h	478	3	-8.66436	-1.64897	0.240134	0.440704	BE-2254	trt_cp	10 uM	24 h	Adipose-derived Stem Cell
Adipose-derived Stem Cell;tozasertib;trt_cp;10 uM;24 h	478	6	-0.104157	-0.0340548	0.974127	0.986185	tozasertib	trt_cp	10 uM	24 h	Adipose-derived Stem Cell
Adipose-derived Stem Cell;mestranol;trt_cp;10 uM;24 h	478	5	0.0716453	0.0107832	0.991911	0.996046	mestranol	trt_cp	10 uM	24 h	Adipose-derived Stem Cell
Neural Progenitor Cell;YS-035;trt_cp;10 uM;24 h	1286	3	-1.35924	-1.01352	0.406989	0.597196	YS-035	trt_cp	10 uM	24 h	Neural Progenitor Cell
Adipose-derived Stem Cell;BRD-K77014406;trt_cp;10 uM;24 h	478	4	-2.52651	-2.31506	0.0909105	0.254193	BRD-K77014406	trt_cp	10 uM	24 h	Adipose-derived Stem Cell
Neural Progenitor Cell;simvastatin;trt_cp;10 uM;24 h	1286	5	-3.78888	-0.664759	0.542349	0.704945	simvastatin	trt_cp	10 uM	24 h	Neural Progenitor Cell
Adipose-derived Stem Cell;sitagliptin;trt_cp;10 uM;24 h	478	3	-5.48662	-1.30302	0.321291	0.52121	sitagliptin	trt_cp	10 uM	24 h	Adipose-derived Stem Cell
Adipose-derived Stem Cell;BD-1008;trt_cp;10 uM;24 h	478	4	-6.91434	-4.08004	0.0235634	0.11522	BD-1008	trt_cp	10 uM	24 h	Adipose-derived Stem Cell
Epithelial Cell;suprofen;trt_cp;10 uM;24 h	4104	3	-2.13277	-1.2606	0.333612	0.532508	suprofen	trt_cp	10 uM	24 h	Epithelial Cell
Epithelial Cell;lomeguatrib;trt_cp;10 uM;24 h	4104	6	-1.15322	-0.70028	0.514701	0.683483	lomeguatrib	trt_cp	10 uM	24 h	Epithelial Cell
Epithelial Cell;hydroxyurea;trt_cp;10 uM;24 h	4104	5	0.762484	0.280149	0.793208	0.882372	hydroxyurea	trt_cp	10 uM	24 h	Epithelial Cell
Epithelial Cell;elesclomol;trt_cp;10 uM;24 h	4104	7	6.77801	1.8458	0.114359	0.28899	elesclomol	trt_cp	10 uM	24 h	Epithelial Cell
Epithelial Cell;budipine;trt_cp;10 uM;24 h	4104	3	-6.33273	-7.39162	0.0161193	0.0912227	budipine	trt_cp	10 uM	24 h	Epithelial Cell
Epithelial Cell;BRD-K74305673;trt_cp;10 uM;24 h	4104	10	4.3973	1.59979	0.143993	0.329665	BRD-K74305673	trt_cp	10 uM	24 h	Epithelial Cell
Epithelial Cell;AM-24;trt_cp;10 uM;24 h	4104	3	2.64432	1.81469	0.209681	0.406794	AM-24	trt_cp	10 uM	24 h	Epithelial Cell
Epithelial Cell;dipyridamole;trt_cp;10 uM;24 h	4104	6	-6.64748	-4.7703	0.00483969	0.0405316	dipyridamole	trt_cp	10 uM	24 h	Epithelial Cell
Fibroblast;GSK-1059615;trt_cp;10 uM;24 h	329	11	4.98604	2.82809	0.0150864	0.0871281	GSK-1059615	trt_cp	10 uM	24 h	Fibroblast
Fibroblast;sitagliptin;trt_cp;10 uM;24 h	329	12	1.80308	0.588092	0.567646	0.724266	sitagliptin	trt_cp	10 uM	24 h	Fibroblast
Epithelial Cell;BRD-K54263226;trt_cp;10 uM;24 h	4104	6	8.05585	4.6388	0.00551704	0.0445072	BRD-K54263226	trt_cp	10 uM	24 h	Epithelial Cell
Fibroblast;dacinostat;trt_cp;10 uM;24 h	329	12	10.033	4.8663	0.000333181	0.00515765	dacinostat	trt_cp	10 uM	24 h	Fibroblast
Fibroblast;F-1566-0341;trt_cp;10 uM;24 h	329	12	5.00963	1.89623	0.0823357	0.240238	F-1566-0341	trt_cp	10 uM	24 h	Fibroblast
Epithelial Cell;saracatinib;trt_cp;10 uM;24 h	4104	13	10.0809	3.07615	0.00958183	0.0647246	saracatinib	trt_cp	10 uM	24 h	Epithelial Cell
Epithelial Cell;lapatinib;trt_cp;10 uM;24 h	4104	9	7.88896	2.33116	0.0480038	0.176022	lapatinib	trt_cp	10 uM	24 h	Epithelial Cell
Fibroblast;hypericin;trt_cp;10 uM;24 h	329	12	1.06385	0.33341	0.74475	0.850786	hypericin	trt_cp	10 uM	24 h	Fibroblast
Fibroblast;H-8;trt_cp;10 uM;24 h	329	12	0.251362	0.0697836	0.945564	0.970206	H-8	trt_cp	10 uM	24 h	Fibroblast
Epithelial Cell;BRD-A44251274;trt_cp;10 uM;24 h	4104	3	22.2516	7.39824	0.0176429	0.0961222	BRD-A44251274	trt_cp	10 uM	24 h	Epithelial Cell
Fibroblast;BRD-K04877770;trt_cp;10 uM;24 h	329	12	-1.05368	-0.382643	0.708742	0.826313	BRD-K04877770	trt_cp	10 uM	24 h	Fibroblast
Fibroblast;GW-0742;trt_cp;10 uM;24 h	329	12	-0.848248	-0.290505	0.776481	0.870979	GW-0742	trt_cp	10 uM	24 h	Fibroblast
Fibroblast;canertinib;trt_cp;10 uM;24 h	329	10	5.63538	2.16876	0.0557806	0.191641	canertinib	trt_cp	10 uM	24 h	Fibroblast
Epithelial Cell;amanitin;trt_cp;10 uM;24 h	4104	3	33.3224	9.99781	0.00977956	0.0655909	amanitin	trt_cp	10 uM	24 h	Epithelial Cell
Fibroblast;BRD-K65411918;trt_cp;10 uM;24 h	329	11	3.18416	1.06248	0.311472	0.51188	BRD-K65411918	trt_cp	10 uM	24 h	Fibroblast
Fibroblast;mosapride;trt_cp;10 uM;24 h	329	12	0.512382	0.234791	0.818187	0.896828	mosapride	trt_cp	10 uM	24 h	Fibroblast
Fibroblast;GANT-58;trt_cp;10 uM;24 h	329	12	0.512085	0.164022	0.872519	0.929343	GANT-58	trt_cp	10 uM	24 h	Fibroblast
Epithelial Cell;GW-843682X;trt_cp;10 uM;24 h	4104	11	-1.00564	-0.4805	0.64115	0.779382	GW-843682X	trt_cp	10 uM	24 h	Epithelial Cell
Epithelial Cell;PD-173074;trt_cp;10 uM;24 h	4104	8	5.28015	2.11385	0.0722107	0.223248	PD-173074	trt_cp	10 uM	24 h	Epithelial Cell
Epithelial Cell;BRD-K71987443;trt_cp;10 uM;24 h	4104	3	4.63257	1.24947	0.337688	0.536132	BRD-K71987443	trt_cp	10 uM	24 h	Epithelial Cell
Epithelial Cell;BRD-K29555302;trt_cp;10 uM;24 h	4104	3	4.56509	2.80534	0.105875	0.277482	BRD-K29555302	trt_cp	10 uM	24 h	Epithelial Cell
Neural Progenitor Cell;BRD-K54606188;trt_cp;10 uM;24 h	1286	9	3.02905	2.20146	0.0553238	0.190841	BRD-K54606188	trt_cp	10 uM	24 h	Neural Progenitor Cell
Epithelial Cell;MG-132;trt_cp;10 uM;24 h	4104	22	0.0519936	0.0701569	0.944701	0.96978	MG-132	trt_cp	10 uM	24 h	Epithelial Cell
HSC;alectinib;trt_cp;10 uM;24 h	179	3	5.49192	2.10829	0.165288	0.355733	alectinib	trt_cp	10 uM	24 h	HSC
Endothelial Cell;methylstat;trt_cp;10 uM;24 h	569	3	1.31584	0.746602	0.531451	0.696874	methylstat	trt_cp	10 uM	24 h	Endothelial Cell
Epithelial Cell;BRD-K19203541;trt_cp;10 uM;24 h	4104	3	2.82984	1.93534	0.191039	0.385377	BRD-K19203541	trt_cp	10 uM	24 h	Epithelial Cell
Epithelial Cell;BRD-K84288283;trt_cp;10 uM;24 h	4104	3	3.71643	3.24546	0.0810712	0.238461	BRD-K84288283	trt_cp	10 uM	24 h	Epithelial Cell
Epithelial Cell;withaferin-a;trt_cp;10 uM;24 h	4104	30	1.42169	1.02612	0.313204	0.513425	withaferin-a	trt_cp	10 uM	24 h	Epithelial Cell
Neural Progenitor Cell;JQ-1-R;trt_cp;10 uM;24 h	1286	9	-7.14605	-12.1387	1.28577e-09	1.3168e-07	JQ-1-R	trt_cp	10 uM	24 h	Neural Progenitor Cell
Neural Progenitor Cell;CC-401;trt_cp;10 uM;24 h	1286	9	-7.1639	-8.95387	1.66377e-06	7.26297e-05	CC-401	trt_cp	10 uM	24 h	Neural Progenitor Cell
Adipose-derived Stem Cell;KIN-001-220;trt_cp;10 uM;24 h	478	6	-0.118433	-0.101588	0.922548	0.958018	KIN-001-220	trt_cp	10 uM	24 h	Adipose-derived Stem Cell
Neural Progenitor Cell;idelalisib;trt_cp;10 uM;24 h	1286	6	-7.81748	-5.59889	0.00175489	0.0190638	idelalisib	trt_cp	10 uM	24 h	Neural Progenitor Cell
Epithelial Cell;BRD-K83525166;trt_cp;10 uM;24 h	4104	3	-3.81988	-1.12025	0.378849	0.571761	BRD-K83525166	trt_cp	10 uM	24 h	Epithelial Cell
Epithelial Cell;BRD-K74713361;trt_cp;10 uM;24 h	4104	3	3.68917	2.5005	0.128084	0.307999	BRD-K74713361	trt_cp	10 uM	24 h	Epithelial Cell
Neural Progenitor Cell;AT-7867;trt_cp;10 uM;24 h	1286	7	-7.73559	-5.14301	0.00159977	0.0178153	AT-7867	trt_cp	10 uM	24 h	Neural Progenitor Cell
Epithelial Cell;TPCA-1;trt_cp;10 uM;24 h	4104	12	-2.11408	-0.63545	0.5381	0.701877	TPCA-1	trt_cp	10 uM	24 h	Epithelial Cell
Epithelial Cell;BRD-K95597153;trt_cp;10 uM;24 h	4104	3	-5.1468	-1.19856	0.353306	0.550507	BRD-K95597153	trt_cp	10 uM	24 h	Epithelial Cell
Epithelial Cell;GANT-58;trt_cp;10 uM;24 h	4104	7	1.31553	0.29872	0.775216	0.870253	GANT-58	trt_cp	10 uM	24 h	Epithelial Cell
Epithelial Cell;JW-74;trt_cp;10 uM;24 h	4104	3	5.2456	5.54944	0.0289917	0.130912	JW-74	trt_cp	10 uM	24 h	Epithelial Cell
Neural Progenitor Cell;BX-795;trt_cp;10 uM;24 h	1286	9	-4.87098	-4.36909	0.00156661	0.0175411	BX-795	trt_cp	10 uM	24 h	Neural Progenitor Cell
Epithelial Cell;O6-benzylguanine;trt_cp;10 uM;24 h	4104	3	0.263031	0.203853	0.857067	0.920058	O6-benzylguanine	trt_cp	10 uM	24 h	Epithelial Cell
Epithelial Cell;BRD-K26910201;trt_cp;10 uM;24 h	4104	3	2.87139	1.13772	0.372761	0.566912	BRD-K26910201	trt_cp	10 uM	24 h	Epithelial Cell
Bone Marrow Stem Cell;CG-930;trt_cp;10 uM;24 h	331	6	0.239084	0.110197	0.916305	0.954458	CG-930	trt_cp	10 uM	24 h	Bone Marrow Stem Cell
Adipose-derived Stem Cell;GDC-0068;trt_cp;10 uM;24 h	478	3	9.19531	9.21787	0.00616472	0.0481203	GDC-0068	trt_cp	10 uM	24 h	Adipose-derived Stem Cell
Epithelial Cell;liranaftate;trt_cp;10 uM;24 h	4104	3	-3.35286	-2.83954	0.102664	0.272339	liranaftate	trt_cp	10 uM	24 h	Epithelial Cell
Embryonic Stem Cell;dasatinib;trt_cp;10 uM;24 h	107	6	1.71167	0.414777	0.693975	0.816072	dasatinib	trt_cp	10 uM	24 h	Embryonic Stem Cell
Embryonic Stem Cell;pazopanib;trt_cp;10 uM;24 h	107	3	-6.35648	-7.09305	1.53184e-10	1.98872e-08	pazopanib	trt_cp	10 uM	24 h	Embryonic Stem Cell
Epithelial Cell;clinafloxacin;trt_cp;10 uM;24 h	4104	3	1.38097	0.377541	0.742009	0.849341	clinafloxacin	trt_cp	10 uM	24 h	Epithelial Cell
Endothelial Cell;XBD-173;trt_cp;10 uM;24 h	569	3	1.86713	0.709806	0.550703	0.711566	XBD-173	trt_cp	10 uM	24 h	Endothelial Cell
Epithelial Cell;bretazenil;trt_cp;10 uM;24 h	4104	3	-3.41735	-0.942751	0.445154	0.628653	bretazenil	trt_cp	10 uM	24 h	Epithelial Cell
Epithelial Cell;tiagabine;trt_cp;10 uM;24 h	4104	3	0.19397	0.11049	0.922034	0.957655	tiagabine	trt_cp	10 uM	24 h	Epithelial Cell
Epithelial Cell;naphazoline;trt_cp;10 uM;24 h	4104	3	-2.1134	-1.74548	0.220786	0.419713	naphazoline	trt_cp	10 uM	24 h	Epithelial Cell
Epithelial Cell;mepazine;trt_cp;10 uM;24 h	4104	3	-3.93252	-3.86625	0.0584203	0.197313	mepazine	trt_cp	10 uM	24 h	Epithelial Cell
Kidney Cell;levothyroxine;trt_cp;10 uM;24 h	1114	3	2.87317	1.58101	0.252689	0.454295	levothyroxine	trt_cp	10 uM	24 h	Kidney Cell
Kidney Cell;cianidanol;trt_cp;10 uM;24 h	1114	3	0.00842062	0.00475646	0.99663	0.998202	cianidanol	trt_cp	10 uM	24 h	Kidney Cell
Endothelial Cell;levothyroxine;trt_cp;10 uM;24 h	569	3	-4.96799	-1.82037	0.208988	0.405967	levothyroxine	trt_cp	10 uM	24 h	Endothelial Cell
Kidney Cell;cisapride;trt_cp;10 uM;24 h	1114	3	1.33487	0.36824	0.747889	0.852293	cisapride	trt_cp	10 uM	24 h	Kidney Cell
Endothelial Cell;tranylcypromine;trt_cp;10 uM;24 h	569	5	-3.16685	-2.78002	0.0465359	0.173167	tranylcypromine	trt_cp	10 uM	24 h	Endothelial Cell
Epithelial Cell;AGN-192403;trt_cp;10 uM;24 h	4104	3	3.89226	1.30545	0.321388	0.521248	AGN-192403	trt_cp	10 uM	24 h	Epithelial Cell
Kidney Cell;phenytoin;trt_cp;10 uM;24 h	1114	3	0.988558	0.526369	0.650474	0.78631	phenytoin	trt_cp	10 uM	24 h	Kidney Cell
Kidney Cell;estramustine-phosphate;trt_cp;10 uM;24 h	1114	3	-1.34829	-2.45562	0.111924	0.285805	estramustine-phosphate	trt_cp	10 uM	24 h	Kidney Cell
Kidney Cell;dipyridamole;trt_cp;10 uM;24 h	1114	3	5.59657	4.06284	0.0529568	0.18611	dipyridamole	trt_cp	10 uM	24 h	Kidney Cell
Neural Progenitor Cell;rolipram;trt_cp;10 uM;24 h	1286	15	12.4028	4.67549	0.000330557	0.00512385	rolipram	trt_cp	10 uM	24 h	Neural Progenitor Cell
Neural Progenitor Cell;AZD-8055;trt_cp;10 uM;24 h	1286	10	12.0596	9.72477	1.5585e-06	6.90704e-05	AZD-8055	trt_cp	10 uM	24 h	Neural Progenitor Cell
Epithelial Cell;ellagic-acid;trt_cp;10 uM;24 h	4104	6	-0.850108	-0.268737	0.798841	0.885606	ellagic-acid	trt_cp	10 uM	24 h	Epithelial Cell
Kidney Cell;rilmenidine;trt_cp;10 uM;24 h	1114	3	1.49682	0.504921	0.663485	0.795594	rilmenidine	trt_cp	10 uM	24 h	Kidney Cell
Kidney Cell;BMS-299897;trt_cp;10 uM;24 h	1114	3	0.127434	0.0262978	0.981403	0.989976	BMS-299897	trt_cp	10 uM	24 h	Kidney Cell
Endothelial Cell;IOX2;trt_cp;10 uM;24 h	569	5	-3.5817	-4.40521	0.00884548	0.061377	IOX2	trt_cp	10 uM	24 h	Endothelial Cell
Kidney Cell;everolimus;trt_cp;10 uM;24 h	1114	5	6.36929	2.93725	0.041907	0.163048	everolimus	trt_cp	10 uM	24 h	Kidney Cell
Endothelial Cell;vorinostat;trt_cp;10 uM;24 h	569	15	9.47536	8.60372	3.57736e-07	1.94598e-05	vorinostat	trt_cp	10 uM	24 h	Endothelial Cell
Epithelial Cell;BRD-K70947604;trt_cp;10 uM;6 h	585	3	-8.96121	-9.75022	0.00151015	0.0170429	BRD-K70947604	trt_cp	10 uM	6 h	Epithelial Cell
Epithelial Cell;sphingosine;trt_cp;10 uM;6 h	585	3	-9.75841	-5.4527	0.0244007	0.117554	sphingosine	trt_cp	10 uM	6 h	Epithelial Cell
Epithelial Cell;pyrimethamine;trt_cp;10 uM;6 h	585	8	-1.04125	-0.49551	0.634184	0.774176	pyrimethamine	trt_cp	10 uM	6 h	Epithelial Cell
Epithelial Cell;streptozotocin;trt_cp;10 uM;6 h	585	3	-2.21937	-2.52846	0.0737192	0.225863	streptozotocin	trt_cp	10 uM	6 h	Epithelial Cell
Epithelial Cell;anagrelide;trt_cp;10 uM;6 h	585	5	-5.65533	-1.95198	0.119536	0.296067	anagrelide	trt_cp	10 uM	6 h	Epithelial Cell
Epithelial Cell;BRD-K71303366;trt_cp;10 uM;6 h	585	3	-1.33843	-0.761298	0.517733	0.685788	BRD-K71303366	trt_cp	10 uM	6 h	Epithelial Cell
Epithelial Cell;diazoxide;trt_cp;10 uM;6 h	585	4	-3.0638	-1.00816	0.384929	0.577469	diazoxide	trt_cp	10 uM	6 h	Epithelial Cell
Epithelial Cell;BRD-K21009077;trt_cp;10 uM;6 h	585	3	-2.29859	-0.664634	0.572797	0.728205	BRD-K21009077	trt_cp	10 uM	6 h	Epithelial Cell
Epithelial Cell;ofloxacin;trt_cp;10 uM;6 h	585	3	-5.95366	-2.28172	0.143114	0.328381	ofloxacin	trt_cp	10 uM	6 h	Epithelial Cell
Epithelial Cell;entecavir;trt_cp;10 uM;6 h	585	3	4.26542	1.18695	0.354122	0.551314	entecavir	trt_cp	10 uM	6 h	Epithelial Cell
Epithelial Cell;lamotrigine;trt_cp;10 uM;6 h	585	5	-6.9625	-3.02131	0.0356457	0.148568	lamotrigine	trt_cp	10 uM	6 h	Epithelial Cell
Epithelial Cell;BRD-A71707563;trt_cp;10 uM;6 h	585	3	6.25018	2.5537	0.117569	0.293381	BRD-A71707563	trt_cp	10 uM	6 h	Epithelial Cell
Epithelial Cell;dexamethasone;trt_cp;10 uM;6 h	585	28	-1.04313	-0.584433	0.56323	0.720901	dexamethasone	trt_cp	10 uM	6 h	Epithelial Cell
Epithelial Cell;monoethylhexylphthalate;trt_cp;10 uM;24 h	4104	9	-6.62689	-1.831	0.104402	0.274986	monoethylhexylphthalate	trt_cp	10 uM	24 h	Epithelial Cell
Embryonic Stem Cell;vandetanib;trt_cp;10 uM;24 h	107	6	3.92642	0.858748	0.426902	0.613255	vandetanib	trt_cp	10 uM	24 h	Embryonic Stem Cell
Embryonic Stem Cell;calcipotriol;trt_cp;10 uM;24 h	107	3	14.4469	11.2404	6.17818e-06	0.000214474	calcipotriol	trt_cp	10 uM	24 h	Embryonic Stem Cell
Embryonic Stem Cell;AMG-232;trt_cp;10 uM;24 h	107	3	26.1944	18.2088	5.54825e-06	0.000194345	AMG-232	trt_cp	10 uM	24 h	Embryonic Stem Cell
Epithelial Cell;SJB-shh-31;trt_cp;10 uM;6 h	585	3	-6.72443	-5.24262	0.0200802	0.104495	SJB-shh-31	trt_cp	10 uM	6 h	Epithelial Cell
Epithelial Cell;BRD-K66766661;trt_cp;10 uM;6 h	585	5	-4.22938	-2.41769	0.0653904	0.210589	BRD-K66766661	trt_cp	10 uM	6 h	Epithelial Cell
Epithelial Cell;BRD-K53423944;trt_cp;10 uM;6 h	585	3	-12.0261	-3.53205	0.0683167	0.216342	BRD-K53423944	trt_cp	10 uM	6 h	Epithelial Cell
Epithelial Cell;tripelennamine;trt_cp;10 uM;6 h	585	3	-8.93016	-9.7173	0.00152596	0.0171796	tripelennamine	trt_cp	10 uM	6 h	Epithelial Cell
Epithelial Cell;BRD-K23149109;trt_cp;10 uM;6 h	585	3	4.24229	1.37705	0.297879	0.498793	BRD-K23149109	trt_cp	10 uM	6 h	Epithelial Cell
Epithelial Cell;BRD-K02598395;trt_cp;10 uM;6 h	585	3	-4.17099	-1.05305	0.400517	0.591793	BRD-K02598395	trt_cp	10 uM	6 h	Epithelial Cell
Epithelial Cell;hydroflumethiazide;trt_cp;10 uM;6 h	585	3	-2.40231	-1.55583	0.241313	0.441851	hydroflumethiazide	trt_cp	10 uM	6 h	Epithelial Cell
Epithelial Cell;demeclocycline;trt_cp;10 uM;6 h	585	3	-6.65109	-2.77625	0.101257	0.270185	demeclocycline	trt_cp	10 uM	6 h	Epithelial Cell
Epithelial Cell;BRD-K92863101;trt_cp;10 uM;6 h	585	3	-8.85246	-2.41505	0.133592	0.315616	BRD-K92863101	trt_cp	10 uM	6 h	Epithelial Cell
Epithelial Cell;BRD-K55591206;trt_cp;10 uM;6 h	585	5	-5.73026	-1.95143	0.119696	0.296144	BRD-K55591206	trt_cp	10 uM	6 h	Epithelial Cell
Epithelial Cell;clomifene;trt_cp;10 uM;6 h	585	6	-6.71059	-2.52933	0.0500684	0.180448	clomifene	trt_cp	10 uM	6 h	Epithelial Cell
Epithelial Cell;BRD-K18249495;trt_cp;10 uM;6 h	585	3	-7.1582	-3.54434	0.0619556	0.204371	BRD-K18249495	trt_cp	10 uM	6 h	Epithelial Cell
Epithelial Cell;SCH-23390;trt_cp;10 uM;6 h	585	6	0.470659	0.228162	0.827804	0.902235	SCH-23390	trt_cp	10 uM	6 h	Epithelial Cell
Epithelial Cell;TTNPB;trt_cp;10 uM;6 h	585	6	-4.82722	-2.81537	0.0322539	0.139804	TTNPB	trt_cp	10 uM	6 h	Epithelial Cell
Epithelial Cell;stavudine;trt_cp;10 uM;6 h	585	4	-4.04187	-1.28031	0.287419	0.489826	stavudine	trt_cp	10 uM	6 h	Epithelial Cell
Epithelial Cell;BRD-K56196992;trt_cp;10 uM;6 h	585	3	-7.70171	-4.65473	0.0326684	0.141016	BRD-K56196992	trt_cp	10 uM	6 h	Epithelial Cell
Epithelial Cell;BRD-K14316227;trt_cp;10 uM;6 h	585	3	-6.22682	-1.49067	0.271987	0.474741	BRD-K14316227	trt_cp	10 uM	6 h	Epithelial Cell
Epithelial Cell;BRD-A07765530;trt_cp;10 uM;6 h	585	3	-9.92288	-2.88402	0.0984458	0.265772	BRD-A07765530	trt_cp	10 uM	6 h	Epithelial Cell
Epithelial Cell;CMAP-CRCGN-CB7950998;trt_cp;10 uM;6 h	585	6	-4.39847	-1.24205	0.267752	0.469956	CMAP-CRCGN-CB7950998	trt_cp	10 uM	6 h	Epithelial Cell
Epithelial Cell;CMAP-CRCGN-CB7950998;trt_cp;10 uM;24 h	4104	6	-8.18739	-7.59088	0.000569524	0.00783976	CMAP-CRCGN-CB7950998	trt_cp	10 uM	24 h	Epithelial Cell
Neural Progenitor Cell;BRD-K50131741;trt_cp;10 uM;24 h	1286	3	-1.8933	-0.419361	0.715334	0.830803	BRD-K50131741	trt_cp	10 uM	24 h	Neural Progenitor Cell
Epithelial Cell;dieldrin;trt_cp;10 uM;6 h	585	7	-6.92223	-2.89075	0.0256647	0.121428	dieldrin	trt_cp	10 uM	6 h	Epithelial Cell
Neural Progenitor Cell;BRD-K16769902;trt_cp;10 uM;24 h	1286	3	-0.852477	-0.277289	0.807082	0.890291	BRD-K16769902	trt_cp	10 uM	24 h	Neural Progenitor Cell
Epithelial Cell;CH-223191;trt_cp;10 uM;24 h	4104	7	-10.1596	-12.5802	1.13624e-05	0.000351146	CH-223191	trt_cp	10 uM	24 h	Epithelial Cell
Neural Progenitor Cell;BRD-K08251038;trt_cp;10 uM;24 h	1286	3	0.818515	0.399071	0.726733	0.839146	BRD-K08251038	trt_cp	10 uM	24 h	Neural Progenitor Cell
Neural Progenitor Cell;BRD-K48598367;trt_cp;10 uM;24 h	1286	3	0.320443	0.104998	0.925768	0.959926	BRD-K48598367	trt_cp	10 uM	24 h	Neural Progenitor Cell
Neural Progenitor Cell;SA-424763;trt_cp;10 uM;24 h	1286	3	1.7227	0.347938	0.760844	0.860864	SA-424763	trt_cp	10 uM	24 h	Neural Progenitor Cell
Neural Progenitor Cell;BRD-K69218883;trt_cp;10 uM;24 h	1286	3	-6.42821	-4.60319	0.0356216	0.148534	BRD-K69218883	trt_cp	10 uM	24 h	Neural Progenitor Cell
Kidney Cell;amitriptyline;trt_cp;10 uM;6 h	21	6	-0.974764	-0.408454	0.696065	0.817505	amitriptyline	trt_cp	10 uM	6 h	Kidney Cell
Neural Progenitor Cell;geldanamycin;trt_cp;10 uM;24 h	1286	9	13.5266	2.34766	0.0466593	0.173441	geldanamycin	trt_cp	10 uM	24 h	Neural Progenitor Cell
Neural Progenitor Cell;BRD-K01048110;trt_cp;10 uM;24 h	1286	3	-2.37775	-0.806401	0.502899	0.674271	BRD-K01048110	trt_cp	10 uM	24 h	Neural Progenitor Cell
Neural Progenitor Cell;BRD-K24106654;trt_cp;10 uM;24 h	1286	3	-2.34086	-2.33035	0.11993	0.29635	BRD-K24106654	trt_cp	10 uM	24 h	Neural Progenitor Cell
Kidney Cell;amitriptyline;trt_cp;10 uM;24 h	1114	7	5.75781	2.85738	0.0284766	0.129524	amitriptyline	trt_cp	10 uM	24 h	Kidney Cell
Kidney Cell;procaine;trt_cp;10 uM;24 h	1114	9	6.42007	1.58623	0.151223	0.33908	procaine	trt_cp	10 uM	24 h	Kidney Cell
Kidney Cell;dabrafenib;trt_cp;10 uM;6 h	21	6	4.33188	2.2899	0.0526255	0.185285	dabrafenib	trt_cp	10 uM	6 h	Kidney Cell
Epithelial Cell;BRD-K85051645;trt_cp;10 uM;24 h	4104	3	-7.94154	-3.47521	0.0732307	0.224965	BRD-K85051645	trt_cp	10 uM	24 h	Epithelial Cell
Epithelial Cell;geldanamycin;trt_cp;10 uM;6 h	585	38	-5.52037	-5.0121	6.68133e-06	0.000228981	geldanamycin	trt_cp	10 uM	6 h	Epithelial Cell
Epithelial Cell;BRD-K73004613;trt_cp;10 uM;24 h	4104	3	-8.75708	-4.60007	0.0435509	0.166878	BRD-K73004613	trt_cp	10 uM	24 h	Epithelial Cell
Epithelial Cell;ketotifen;trt_cp;10 uM;6 h	585	4	-5.43247	-3.12625	0.0438826	0.167448	ketotifen	trt_cp	10 uM	6 h	Epithelial Cell
Epithelial Cell;GR-144053;trt_cp;10 uM;24 h	4104	3	-8.18195	-2.51541	0.128015	0.307936	GR-144053	trt_cp	10 uM	24 h	Epithelial Cell
Epithelial Cell;nitrarine;trt_cp;10 uM;24 h	4104	3	-6.15364	-2.59596	0.121284	0.298308	nitrarine	trt_cp	10 uM	24 h	Epithelial Cell
Epithelial Cell;warfarin;trt_cp;10 uM;6 h	585	5	-1.45952	-0.886441	0.419149	0.60688	warfarin	trt_cp	10 uM	6 h	Epithelial Cell
Epithelial Cell;BD-1008;trt_cp;10 uM;24 h	4104	3	-6.61423	-3.77282	0.0627809	0.205637	BD-1008	trt_cp	10 uM	24 h	Epithelial Cell
Epithelial Cell;QX-314;trt_cp;10 uM;24 h	4104	3	-3.8516	-2.24804	0.152432	0.3405	QX-314	trt_cp	10 uM	24 h	Epithelial Cell
Epithelial Cell;aristolochic-acid;trt_cp;10 uM;6 h	585	3	-8.86748	-2.43559	0.131697	0.313065	aristolochic-acid	trt_cp	10 uM	6 h	Epithelial Cell
Epithelial Cell;D-64406;trt_cp;10 uM;6 h	585	3	-3.19081	-0.555221	0.633998	0.77403	D-64406	trt_cp	10 uM	6 h	Epithelial Cell
Epithelial Cell;BAY-36-7620;trt_cp;10 uM;24 h	4104	3	-3.89308	-4.99074	0.0346484	0.146351	BAY-36-7620	trt_cp	10 uM	24 h	Epithelial Cell
Epithelial Cell;SEW-2871;trt_cp;10 uM;24 h	4104	3	-0.824165	-0.205582	0.856116	0.919604	SEW-2871	trt_cp	10 uM	24 h	Epithelial Cell
Epithelial Cell;BRD-K77432048;trt_cp;10 uM;6 h	585	5	-3.71223	-2.64608	0.0466845	0.173498	BRD-K77432048	trt_cp	10 uM	6 h	Epithelial Cell
Epithelial Cell;BRD-K45355657;trt_cp;10 uM;24 h	4104	3	-2.31219	-1.04344	0.40579	0.596211	BRD-K45355657	trt_cp	10 uM	24 h	Epithelial Cell
Epithelial Cell;corynanthine;trt_cp;10 uM;24 h	4104	3	-8.77027	-2.4384	0.134707	0.316836	corynanthine	trt_cp	10 uM	24 h	Epithelial Cell
Epithelial Cell;BRD-K63181962;trt_cp;10 uM;6 h	585	3	0.94347	0.281618	0.80392	0.888628	BRD-K63181962	trt_cp	10 uM	6 h	Epithelial Cell
Epithelial Cell;aminopentamide;trt_cp;10 uM;6 h	585	3	-7.29658	-2.02597	0.176339	0.369136	aminopentamide	trt_cp	10 uM	6 h	Epithelial Cell
Epithelial Cell;alprenolol;trt_cp;10 uM;24 h	4104	3	-9.99726	-12.1212	0.00582325	0.0461564	alprenolol	trt_cp	10 uM	24 h	Epithelial Cell
Epithelial Cell;siguazodan;trt_cp;10 uM;6 h	585	4	-3.1074	-2.2773	0.0902353	0.253197	siguazodan	trt_cp	10 uM	6 h	Epithelial Cell
Epithelial Cell;sulpiride;trt_cp;10 uM;24 h	4104	5	-6.59735	-4.69686	0.00903297	0.0621838	sulpiride	trt_cp	10 uM	24 h	Epithelial Cell
Epithelial Cell;VAMA-37;trt_cp;10 uM;24 h	4104	3	-5.08822	-2.46846	0.131547	0.312732	VAMA-37	trt_cp	10 uM	24 h	Epithelial Cell
Epithelial Cell;piperlongumine;trt_cp;10 uM;6 h	585	8	-9.82908	-4.83605	0.00145201	0.0164799	piperlongumine	trt_cp	10 uM	6 h	Epithelial Cell
Epithelial Cell;BRD-A12083771;trt_cp;10 uM;6 h	585	6	-3.08652	-1.7181	0.139769	0.324118	BRD-A12083771	trt_cp	10 uM	6 h	Epithelial Cell
Epithelial Cell;probucol;trt_cp;10 uM;6 h	585	3	0.326987	0.435451	0.683358	0.808766	probucol	trt_cp	10 uM	6 h	Epithelial Cell
Epithelial Cell;dichlorobenzamil;trt_cp;10 uM;24 h	4104	3	-8.41192	-3.61178	0.0683432	0.216402	dichlorobenzamil	trt_cp	10 uM	24 h	Epithelial Cell
Epithelial Cell;tranylcypromine;trt_cp;10 uM;24 h	4104	4	-6.47805	-6.51946	0.00675157	0.0513438	tranylcypromine	trt_cp	10 uM	24 h	Epithelial Cell
Epithelial Cell;BRD-K24468827;trt_cp;10 uM;6 h	585	3	0.296863	0.505705	0.624466	0.76686	BRD-K24468827	trt_cp	10 uM	6 h	Epithelial Cell
Epithelial Cell;BRD-K27520107;trt_cp;10 uM;6 h	585	3	-5.9814	-1.61398	0.244544	0.445435	BRD-K27520107	trt_cp	10 uM	6 h	Epithelial Cell
Epithelial Cell;losartan;trt_cp;10 uM;24 h	4104	6	-3.97605	-2.02895	0.0978568	0.264796	losartan	trt_cp	10 uM	24 h	Epithelial Cell
Epithelial Cell;coumestrol;trt_cp;10 uM;6 h	585	3	-2.34721	-0.990638	0.420338	0.607945	coumestrol	trt_cp	10 uM	6 h	Epithelial Cell
Epithelial Cell;BRD-K91818252;trt_cp;10 uM;6 h	585	3	-1.26542	-0.629673	0.588076	0.739427	BRD-K91818252	trt_cp	10 uM	6 h	Epithelial Cell
Epithelial Cell;L-689560;trt_cp;10 uM;6 h	585	6	-7.37702	-4.92652	0.0026958	0.0263861	L-689560	trt_cp	10 uM	6 h	Epithelial Cell
Epithelial Cell;megestrol-acetate;trt_cp;10 uM;24 h	4104	6	-9.39544	-4.9691	0.00413082	0.0361284	megestrol-acetate	trt_cp	10 uM	24 h	Epithelial Cell
Epithelial Cell;angiogenesis-inhibitor;trt_cp;10 uM;6 h	585	3	-7.66119	-2.20919	0.153842	0.342248	angiogenesis-inhibitor	trt_cp	10 uM	6 h	Epithelial Cell
Epithelial Cell;JAS07-003;trt_cp;10 uM;24 h	4104	3	-8.96889	-2.58814	0.122194	0.299621	JAS07-003	trt_cp	10 uM	24 h	Epithelial Cell
Epithelial Cell;BRD-K92419424;trt_cp;10 uM;6 h	585	3	0.975286	0.506794	0.658214	0.791884	BRD-K92419424	trt_cp	10 uM	6 h	Epithelial Cell
Epithelial Cell;levcromakalim;trt_cp;10 uM;6 h	585	3	-5.62379	-1.03466	0.40836	0.598199	levcromakalim	trt_cp	10 uM	6 h	Epithelial Cell
Epithelial Cell;quinapril;trt_cp;10 uM;6 h	585	3	-9.99021	-2.70633	0.11041	0.283779	quinapril	trt_cp	10 uM	6 h	Epithelial Cell
Epithelial Cell;loperamide;trt_cp;10 uM;6 h	585	9	-3.79139	-3.80517	0.00245049	0.0245633	loperamide	trt_cp	10 uM	6 h	Epithelial Cell
Epithelial Cell;BRD-K73481389;trt_cp;10 uM;6 h	585	3	3.15198	0.83108	0.491382	0.665257	BRD-K73481389	trt_cp	10 uM	6 h	Epithelial Cell
Epithelial Cell;L-690330;trt_cp;10 uM;6 h	585	4	-4.87344	-2.27154	0.100694	0.269197	L-690330	trt_cp	10 uM	6 h	Epithelial Cell
Epithelial Cell;meloxicam;trt_cp;10 uM;6 h	585	6	2.62652	0.884535	0.415287	0.603918	meloxicam	trt_cp	10 uM	6 h	Epithelial Cell
Epithelial Cell;BRD-K34412705;trt_cp;10 uM;6 h	585	3	1.06502	0.348029	0.759864	0.860158	BRD-K34412705	trt_cp	10 uM	6 h	Epithelial Cell
Epithelial Cell;BRD-K51454562;trt_cp;10 uM;6 h	585	3	-6.3383	-2.7195	0.104601	0.275324	BRD-K51454562	trt_cp	10 uM	6 h	Epithelial Cell
Epithelial Cell;flutamide;trt_cp;10 uM;24 h	4104	3	-5.36021	-2.78722	0.107383	0.27982	flutamide	trt_cp	10 uM	24 h	Epithelial Cell
Epithelial Cell;vinpocetine;trt_cp;10 uM;24 h	4104	9	-5.52655	-3.56332	0.00723497	0.0536676	vinpocetine	trt_cp	10 uM	24 h	Epithelial Cell
Epithelial Cell;BRD-K23980805;trt_cp;10 uM;24 h	4104	3	-5.11392	-2.09884	0.170131	0.361646	BRD-K23980805	trt_cp	10 uM	24 h	Epithelial Cell
Epithelial Cell;GR-127935;trt_cp;10 uM;24 h	4104	3	0.38997	0.11894	0.916169	0.954402	GR-127935	trt_cp	10 uM	24 h	Epithelial Cell
Epithelial Cell;prednisolone-acetate;trt_cp;10 uM;6 h	585	3	-7.12238	-1.52803	0.26402	0.466102	prednisolone-acetate	trt_cp	10 uM	6 h	Epithelial Cell
Epithelial Cell;isoreserpine;trt_cp;10 uM;6 h	585	3	-6.80843	-4.88939	0.0257707	0.121637	isoreserpine	trt_cp	10 uM	6 h	Epithelial Cell
Epithelial Cell;triamterene;trt_cp;10 uM;24 h	4104	4	-5.1508	-3.08422	0.0532897	0.186804	triamterene	trt_cp	10 uM	24 h	Epithelial Cell
Epithelial Cell;digoxin;trt_cp;10 uM;6 h	585	9	0.883614	0.436147	0.673251	0.802182	digoxin	trt_cp	10 uM	6 h	Epithelial Cell
Epithelial Cell;leucodin;trt_cp;10 uM;24 h	4104	3	-9.23891	-13.5014	0.00433868	0.0373569	leucodin	trt_cp	10 uM	24 h	Epithelial Cell
Epithelial Cell;BRD-K97629076;trt_cp;10 uM;24 h	4104	3	-8.45492	-7.08736	0.0183963	0.0987745	BRD-K97629076	trt_cp	10 uM	24 h	Epithelial Cell
Epithelial Cell;parthenolide;trt_cp;10 uM;24 h	4104	8	10.5609	5.2183	0.00120365	0.0142251	parthenolide	trt_cp	10 uM	24 h	Epithelial Cell
Epithelial Cell;testosterone;trt_cp;10 uM;6 h	585	11	-5.73444	-4.92942	0.000247909	0.00408576	testosterone	trt_cp	10 uM	6 h	Epithelial Cell
Epithelial Cell;Y-26763;trt_cp;10 uM;24 h	4104	4	-6.11983	-12.2594	0.000680655	0.00905543	Y-26763	trt_cp	10 uM	24 h	Epithelial Cell
Epithelial Cell;ticlopidine;trt_cp;10 uM;24 h	4104	6	-8.22623	-4.84182	0.004595	0.0390441	ticlopidine	trt_cp	10 uM	24 h	Epithelial Cell
Epithelial Cell;aloisine;trt_cp;10 uM;6 h	585	6	-1.49337	-1.00192	0.355279	0.55257	aloisine	trt_cp	10 uM	6 h	Epithelial Cell
Epithelial Cell;ARP-101;trt_cp;10 uM;6 h	585	8	-0.64428	-0.379572	0.714129	0.830018	ARP-101	trt_cp	10 uM	6 h	Epithelial Cell
Epithelial Cell;BRD-K97926541;trt_cp;10 uM;24 h	4104	3	-8.40796	-4.54609	0.0444923	0.168763	BRD-K97926541	trt_cp	10 uM	24 h	Epithelial Cell
Epithelial Cell;BRD-A28105619;trt_cp;10 uM;6 h	585	4	-5.74277	-1.82144	0.16263	0.352372	BRD-A28105619	trt_cp	10 uM	6 h	Epithelial Cell
Epithelial Cell;MK-2206;trt_cp;10 uM;6 h	585	5	-3.01525	-2.63602	0.0424603	0.164267	MK-2206	trt_cp	10 uM	6 h	Epithelial Cell
Epithelial Cell;pentoxifylline;trt_cp;10 uM;6 h	585	4	-7.32814	-1.75084	0.176315	0.369136	pentoxifylline	trt_cp	10 uM	6 h	Epithelial Cell
Epithelial Cell;safrolglycol;trt_cp;10 uM;24 h	4104	3	-6.10556	-4.73444	0.0405665	0.160444	safrolglycol	trt_cp	10 uM	24 h	Epithelial Cell
Epithelial Cell;vemurafenib;trt_cp;10 uM;24 h	4104	10	-2.31606	-0.71536	0.492482	0.666058	vemurafenib	trt_cp	10 uM	24 h	Epithelial Cell
Epithelial Cell;BRD-A93942655;trt_cp;10 uM;6 h	585	3	-8.08416	-2.61513	0.115623	0.290844	BRD-A93942655	trt_cp	10 uM	6 h	Epithelial Cell
Epithelial Cell;betulinic-acid;trt_cp;10 uM;24 h	4104	5	-4.36102	-2.12979	0.0998019	0.267962	betulinic-acid	trt_cp	10 uM	24 h	Epithelial Cell
Epithelial Cell;meloxicam;trt_cp;10 uM;24 h	4104	5	-3.66026	-2.10727	0.102207	0.271726	meloxicam	trt_cp	10 uM	24 h	Epithelial Cell
Epithelial Cell;estradiol;trt_cp;10 uM;6 h	585	10	-6.70335	-3.9689	0.00249377	0.0248877	estradiol	trt_cp	10 uM	6 h	Epithelial Cell
Epithelial Cell;TTNPB;trt_cp;10 uM;24 h	4104	5	0.448578	0.0788673	0.940923	0.968032	TTNPB	trt_cp	10 uM	24 h	Epithelial Cell
Epithelial Cell;DAU-5884;trt_cp;10 uM;24 h	4104	3	-9.74201	-6.7768	0.0204034	0.10537	DAU-5884	trt_cp	10 uM	24 h	Epithelial Cell
Epithelial Cell;primidone;trt_cp;10 uM;6 h	585	6	-3.73625	-1.05335	0.33905	0.5376	primidone	trt_cp	10 uM	6 h	Epithelial Cell
Epithelial Cell;pentobarbital;trt_cp;10 uM;24 h	4104	3	-5.63866	-5.87329	0.0259866	0.122243	pentobarbital	trt_cp	10 uM	24 h	Epithelial Cell
Epithelial Cell;BW-B70C;trt_cp;10 uM;6 h	585	5	-5.4967	-2.77144	0.0450817	0.17002	BW-B70C	trt_cp	10 uM	6 h	Epithelial Cell
Epithelial Cell;BRD-K71860425;trt_cp;10 uM;24 h	4104	3	-10.0992	-5.67036	0.0291701	0.131446	BRD-K71860425	trt_cp	10 uM	24 h	Epithelial Cell
Epithelial Cell;dibenzepin;trt_cp;10 uM;6 h	585	3	-7.80229	-4.27329	0.0410965	0.16155	dibenzepin	trt_cp	10 uM	6 h	Epithelial Cell
Epithelial Cell;BRD-K73143528;trt_cp;10 uM;24 h	4104	3	-6.49096	-4.44581	0.0459997	0.172052	BRD-K73143528	trt_cp	10 uM	24 h	Epithelial Cell
Epithelial Cell;menadione;trt_cp;10 uM;24 h	4104	5	-1.60735	-0.631698	0.561755	0.719801	menadione	trt_cp	10 uM	24 h	Epithelial Cell
Epithelial Cell;BRD-K97440753;trt_cp;10 uM;24 h	4104	5	-3.72861	-2.52127	0.0645328	0.208964	BRD-K97440753	trt_cp	10 uM	24 h	Epithelial Cell
Epithelial Cell;RS-100329;trt_cp;10 uM;24 h	4104	3	-11.1828	-9.96745	0.00924596	0.0632387	RS-100329	trt_cp	10 uM	24 h	Epithelial Cell
Epithelial Cell;dihydrosamidin;trt_cp;10 uM;24 h	4104	3	-12.5832	-11.4973	0.00690698	0.0519967	dihydrosamidin	trt_cp	10 uM	24 h	Epithelial Cell
Epithelial Cell;BRD-K30381384;trt_cp;10 uM;24 h	4104	3	-7.86064	-5.24494	0.0336356	0.143759	BRD-K30381384	trt_cp	10 uM	24 h	Epithelial Cell
Epithelial Cell;BRD-K98288062;trt_cp;10 uM;6 h	585	3	3.50148	1.93944	0.177562	0.370554	BRD-K98288062	trt_cp	10 uM	6 h	Epithelial Cell
Epithelial Cell;BRD-K36591038;trt_cp;10 uM;6 h	585	4	-9.78248	-4.05	0.0239381	0.116183	BRD-K36591038	trt_cp	10 uM	6 h	Epithelial Cell
Epithelial Cell;BRD-K60965159;trt_cp;10 uM;6 h	585	3	-0.714078	-0.128786	0.909183	0.95047	BRD-K60965159	trt_cp	10 uM	6 h	Epithelial Cell
Epithelial Cell;resveratrol;trt_cp;10 uM;6 h	585	11	-0.507955	-0.398026	0.697184	0.818362	resveratrol	trt_cp	10 uM	6 h	Epithelial Cell
Epithelial Cell;BRD-K14833463;trt_cp;10 uM;6 h	585	3	0.0851573	0.0226135	0.983964	0.991634	BRD-K14833463	trt_cp	10 uM	6 h	Epithelial Cell
Epithelial Cell;QS-11;trt_cp;10 uM;6 h	585	5	-3.37059	-4.16991	0.0032398	0.0301874	QS-11	trt_cp	10 uM	6 h	Epithelial Cell
Neural Progenitor Cell;BRD-A84423900;trt_cp;10 uM;6 h	73	3	-12.9999	-5.11752	0.00417732	0.0363669	BRD-A84423900	trt_cp	10 uM	6 h	Neural Progenitor Cell
Neural Progenitor Cell;n-methylphenothiazine;trt_cp;10 uM;6 h	73	3	-9.97521	-2.81543	0.0670882	0.21391	n-methylphenothiazine	trt_cp	10 uM	6 h	Neural Progenitor Cell
Neural Progenitor Cell;APEC;trt_cp;10 uM;6 h	73	3	-2.75389	-0.338579	0.7652	0.863706	APEC	trt_cp	10 uM	6 h	Neural Progenitor Cell
Neural Progenitor Cell;methyltyramine;trt_cp;10 uM;24 h	1286	4	9.06239	0.885677	0.440904	0.625008	methyltyramine	trt_cp	10 uM	24 h	Neural Progenitor Cell
Neural Progenitor Cell;alitretinoin;trt_cp;10 uM;24 h	1286	7	2.34538	0.339569	0.745703	0.851385	alitretinoin	trt_cp	10 uM	24 h	Neural Progenitor Cell
Neural Progenitor Cell;glycocholic-acid;trt_cp;10 uM;24 h	1286	7	3.73215	0.529257	0.61555	0.760009	glycocholic-acid	trt_cp	10 uM	24 h	Neural Progenitor Cell
Neural Progenitor Cell;BG-1013;trt_cp;10 uM;24 h	1286	4	12.7552	1.58157	0.211603	0.408797	BG-1013	trt_cp	10 uM	24 h	Neural Progenitor Cell
Neural Progenitor Cell;GW-9662;trt_cp;10 uM;24 h	1286	10	8.44329	1.52222	0.162055	0.351869	GW-9662	trt_cp	10 uM	24 h	Neural Progenitor Cell
Neural Progenitor Cell;glucosamine;trt_cp;10 uM;6 h	73	4	8.27999	0.866674	0.446975	0.629692	glucosamine	trt_cp	10 uM	6 h	Neural Progenitor Cell
Neural Progenitor Cell;AGK-2;trt_cp;10 uM;24 h	1286	17	-1.56831	-0.463931	0.648834	0.784953	AGK-2	trt_cp	10 uM	24 h	Neural Progenitor Cell
Neural Progenitor Cell;tamoxifen;trt_cp;10 uM;6 h	73	6	2.05874	0.249868	0.811991	0.893391	tamoxifen	trt_cp	10 uM	6 h	Neural Progenitor Cell
Neural Progenitor Cell;BRD-K92326486;trt_cp;10 uM;6 h	73	4	-4.23147	-0.562777	0.609987	0.756244	BRD-K92326486	trt_cp	10 uM	6 h	Neural Progenitor Cell
Neural Progenitor Cell;AM-580;trt_cp;10 uM;6 h	73	3	12.0962	1.49357	0.265585	0.467647	AM-580	trt_cp	10 uM	6 h	Neural Progenitor Cell
Neural Progenitor Cell;CGS-21680;trt_cp;10 uM;6 h	73	3	-4.26457	-0.496024	0.66635	0.797824	CGS-21680	trt_cp	10 uM	6 h	Neural Progenitor Cell
Neural Progenitor Cell;androstenedione;trt_cp;10 uM;24 h	1286	7	1.74046	0.274221	0.793065	0.882263	androstenedione	trt_cp	10 uM	24 h	Neural Progenitor Cell
Epithelial Cell;BRD-K19826688;trt_cp;10 uM;6 h	585	4	-13.2209	-13.4302	7.11946e-05	0.00155396	BRD-K19826688	trt_cp	10 uM	6 h	Epithelial Cell
Adipose-derived Stem Cell;BRD-K06020002;trt_cp;10 uM;24 h	478	4	-6.0346	-3.32527	0.0413971	0.162057	BRD-K06020002	trt_cp	10 uM	24 h	Adipose-derived Stem Cell
Neural Progenitor Cell;diltiazem;trt_cp;10 uM;24 h	1286	7	-7.80471	-4.1701	0.00514466	0.0423643	diltiazem	trt_cp	10 uM	24 h	Neural Progenitor Cell
Adipose-derived Stem Cell;NP-010914;trt_cp;10 uM;24 h	478	3	2.07928	0.72406	0.542862	0.70537	NP-010914	trt_cp	10 uM	24 h	Adipose-derived Stem Cell
Adipose-derived Stem Cell;NSC-663284;trt_cp;10 uM;24 h	478	4	-9.03986	-2.11211	0.124238	0.30265	NSC-663284	trt_cp	10 uM	24 h	Adipose-derived Stem Cell
Adipose-derived Stem Cell;bisoprolol;trt_cp;10 uM;24 h	478	3	-11.1373	-2.59642	0.120636	0.297544	bisoprolol	trt_cp	10 uM	24 h	Adipose-derived Stem Cell
Adipose-derived Stem Cell;MD-049;trt_cp;10 uM;24 h	478	4	0.0579775	0.0220732	0.983742	0.991499	MD-049	trt_cp	10 uM	24 h	Adipose-derived Stem Cell
Adipose-derived Stem Cell;BRD-K35638681;trt_cp;10 uM;24 h	478	4	-5.47644	-1.18052	0.322236	0.522025	BRD-K35638681	trt_cp	10 uM	24 h	Adipose-derived Stem Cell
Adipose-derived Stem Cell;ML-7;trt_cp;10 uM;24 h	478	3	-6.20429	-2.32616	0.142385	0.327418	ML-7	trt_cp	10 uM	24 h	Adipose-derived Stem Cell
Adipose-derived Stem Cell;BRD-K96433222;trt_cp;10 uM;24 h	478	4	-4.58532	-1.14348	0.334991	0.533903	BRD-K96433222	trt_cp	10 uM	24 h	Adipose-derived Stem Cell
Adipose-derived Stem Cell;etodolac;trt_cp;10 uM;24 h	478	4	-4.26204	-1.12081	0.343096	0.54119	etodolac	trt_cp	10 uM	24 h	Adipose-derived Stem Cell
Epithelial Cell;carbofuran;trt_cp;10 uM;6 h	585	3	-4.26928	-1.2027	0.349054	0.546689	carbofuran	trt_cp	10 uM	6 h	Epithelial Cell
Epithelial Cell;mefexamide;trt_cp;10 uM;24 h	4104	3	-2.822	-0.965409	0.435929	0.620809	mefexamide	trt_cp	10 uM	24 h	Epithelial Cell
Epithelial Cell;indapamide;trt_cp;10 uM;24 h	4104	3	-5.72953	-1.24616	0.338747	0.537339	indapamide	trt_cp	10 uM	24 h	Epithelial Cell
Epithelial Cell;yohimbine;trt_cp;10 uM;24 h	4104	11	-6.99593	-4.91952	0.000582576	0.00799108	yohimbine	trt_cp	10 uM	24 h	Epithelial Cell
Epithelial Cell;BRD-K24677486;trt_cp;10 uM;24 h	4104	3	-8.5818	-4.38416	0.0476949	0.17579	BRD-K24677486	trt_cp	10 uM	24 h	Epithelial Cell
Epithelial Cell;ASN-05257430;trt_cp;10 uM;24 h	4104	5	-2.45787	-1.77206	0.150104	0.337672	ASN-05257430	trt_cp	10 uM	24 h	Epithelial Cell
Epithelial Cell;mead-ethanolamide;trt_cp;10 uM;6 h	585	3	-5.81408	-4.25157	0.0347679	0.146554	mead-ethanolamide	trt_cp	10 uM	6 h	Epithelial Cell
Epithelial Cell;SB-218795;trt_cp;10 uM;24 h	4104	3	-6.78441	-2.97972	0.0960048	0.262117	SB-218795	trt_cp	10 uM	24 h	Epithelial Cell
Epithelial Cell;BRD-K71265179;trt_cp;10 uM;24 h	4104	6	-3.5453	-1.32616	0.241937	0.442643	BRD-K71265179	trt_cp	10 uM	24 h	Epithelial Cell
Epithelial Cell;decafluorobutane;trt_cp;10 uM;24 h	4104	3	-6.29313	-3.46694	0.0732363	0.224965	decafluorobutane	trt_cp	10 uM	24 h	Epithelial Cell
Epithelial Cell;ipratropium;trt_cp;10 uM;24 h	4104	11	-4.52096	-2.54847	0.0287676	0.130327	ipratropium	trt_cp	10 uM	24 h	Epithelial Cell
Epithelial Cell;budesonide;trt_cp;10 uM;24 h	4104	9	-6.12353	-5.00338	0.000994659	0.012214	budesonide	trt_cp	10 uM	24 h	Epithelial Cell
Epithelial Cell;IC-261;trt_cp;10 uM;6 h	585	3	-5.81384	-1.30243	0.320489	0.520384	IC-261	trt_cp	10 uM	6 h	Epithelial Cell
Epithelial Cell;L-745870;trt_cp;10 uM;24 h	4104	3	-7.88692	-3.49429	0.0725022	0.223932	L-745870	trt_cp	10 uM	24 h	Epithelial Cell
Epithelial Cell;BRD-K76064317;trt_cp;10 uM;6 h	585	3	-8.06642	-3.37954	0.0705939	0.220396	BRD-K76064317	trt_cp	10 uM	6 h	Epithelial Cell
Epithelial Cell;BRD-K21064560;trt_cp;10 uM;6 h	585	3	-1.43151	-0.319107	0.779393	0.872932	BRD-K21064560	trt_cp	10 uM	6 h	Epithelial Cell
Epithelial Cell;camptothecin;trt_cp;10 uM;24 h	4104	4	27.4491	6.19137	0.00845392	0.0598128	camptothecin	trt_cp	10 uM	24 h	Epithelial Cell
Epithelial Cell;clofarabine;trt_cp;10 uM;24 h	4104	8	-1.71801	-0.770047	0.466332	0.645618	clofarabine	trt_cp	10 uM	24 h	Epithelial Cell
Epithelial Cell;CDC;trt_cp;10 uM;24 h	4104	3	-3.20631	-5.12347	0.0312305	0.137069	CDC	trt_cp	10 uM	24 h	Epithelial Cell
Epithelial Cell;doxorubicin;trt_cp;10 uM;6 h	585	13	-4.61664	-2.61073	0.0209505	0.107045	doxorubicin	trt_cp	10 uM	6 h	Epithelial Cell
Epithelial Cell;niguldipine;trt_cp;10 uM;6 h	585	8	-0.572806	-0.37541	0.716789	0.832009	niguldipine	trt_cp	10 uM	6 h	Epithelial Cell
Epithelial Cell;ceramide;trt_cp;10 uM;24 h	4104	6	-2.23172	-1.3004	0.249701	0.451244	ceramide	trt_cp	10 uM	24 h	Epithelial Cell
Epithelial Cell;pioglitazone;trt_cp;10 uM;6 h	585	8	0.128078	0.0217491	0.983249	0.991282	pioglitazone	trt_cp	10 uM	6 h	Epithelial Cell
Epithelial Cell;DMBI;trt_cp;10 uM;24 h	4104	3	-9.63097	-6.70392	0.0208396	0.106635	DMBI	trt_cp	10 uM	24 h	Epithelial Cell
Epithelial Cell;tenoxicam;trt_cp;10 uM;24 h	4104	3	-8.03683	-8.75306	0.0116173	0.0735747	tenoxicam	trt_cp	10 uM	24 h	Epithelial Cell
Epithelial Cell;orthothymotinic-acid;trt_cp;10 uM;6 h	585	3	-3.02355	-3.031	0.0553668	0.190933	orthothymotinic-acid	trt_cp	10 uM	6 h	Epithelial Cell
Epithelial Cell;LY-225910;trt_cp;10 uM;24 h	4104	3	-5.95467	-4.4384	0.0459516	0.171964	LY-225910	trt_cp	10 uM	24 h	Epithelial Cell
Epithelial Cell;BRD-K24053527;trt_cp;10 uM;6 h	585	3	-11.2212	-7.47755	0.0104944	0.0688383	BRD-K24053527	trt_cp	10 uM	6 h	Epithelial Cell
Epithelial Cell;BRD-K49562544;trt_cp;10 uM;6 h	585	3	-7.30806	-4.15417	0.0428374	0.165396	BRD-K49562544	trt_cp	10 uM	6 h	Epithelial Cell
Epithelial Cell;nizatidine;trt_cp;10 uM;6 h	585	4	-4.99264	-1.82275	0.161302	0.351019	nizatidine	trt_cp	10 uM	6 h	Epithelial Cell
Epithelial Cell;pinocembrin;trt_cp;10 uM;6 h	585	3	-5.41986	-4.36442	0.0298456	0.13332	pinocembrin	trt_cp	10 uM	6 h	Epithelial Cell
Epithelial Cell;ciclacillin;trt_cp;10 uM;24 h	4104	3	-4.08083	-1.81198	0.21103	0.408231	ciclacillin	trt_cp	10 uM	24 h	Epithelial Cell
Epithelial Cell;estropipate;trt_cp;10 uM;6 h	585	7	-6.97397	-3.96572	0.00574825	0.045728	estropipate	trt_cp	10 uM	6 h	Epithelial Cell
Epithelial Cell;pantoprazole;trt_cp;10 uM;6 h	585	4	-8.58288	-7.69473	0.00130645	0.015201	pantoprazole	trt_cp	10 uM	6 h	Epithelial Cell
Epithelial Cell;PKCbeta-inhibitor;trt_cp;10 uM;6 h	585	5	-2.47999	-1.31553	0.251909	0.453568	PKCbeta-inhibitor	trt_cp	10 uM	6 h	Epithelial Cell
Epithelial Cell;BRD-K94381355;trt_cp;10 uM;6 h	585	3	1.27661	0.278752	0.8062	0.88979	BRD-K94381355	trt_cp	10 uM	6 h	Epithelial Cell
Epithelial Cell;BRD-K93331292;trt_cp;10 uM;6 h	585	3	0.179096	0.0622164	0.955823	0.976144	BRD-K93331292	trt_cp	10 uM	6 h	Epithelial Cell
Epithelial Cell;BRD-K74447990;trt_cp;10 uM;6 h	585	3	1.34053	0.339019	0.766198	0.864582	BRD-K74447990	trt_cp	10 uM	6 h	Epithelial Cell
Epithelial Cell;BRD-K55844427;trt_cp;10 uM;6 h	585	3	-0.538051	-0.147597	0.89586	0.942607	BRD-K55844427	trt_cp	10 uM	6 h	Epithelial Cell
Neural Progenitor Cell;ellagic-acid;trt_cp;10 uM;24 h	1286	5	13.4843	1.53723	0.19886	0.394322	ellagic-acid	trt_cp	10 uM	24 h	Neural Progenitor Cell
Neural Progenitor Cell;methoprene-acid;trt_cp;10 uM;6 h	73	4	8.37532	0.875203	0.442961	0.626702	methoprene-acid	trt_cp	10 uM	6 h	Neural Progenitor Cell
Neural Progenitor Cell;LY-294002;trt_cp;10 uM;6 h	73	5	-0.98406	-0.182774	0.862566	0.92339	LY-294002	trt_cp	10 uM	6 h	Neural Progenitor Cell
Neural Progenitor Cell;BRD-K79052598;trt_cp;10 uM;6 h	73	5	-1.16241	-0.19403	0.854485	0.91884	BRD-K79052598	trt_cp	10 uM	6 h	Neural Progenitor Cell
Neural Progenitor Cell;BRD-K89912164;trt_cp;10 uM;6 h	73	3	0.362985	0.0426928	0.969608	0.983598	BRD-K89912164	trt_cp	10 uM	6 h	Neural Progenitor Cell
Neural Progenitor Cell;caffeine;trt_cp;10 uM;6 h	73	5	6.27979	0.721817	0.50809	0.678599	caffeine	trt_cp	10 uM	6 h	Neural Progenitor Cell
Neural Progenitor Cell;BRD-A18795974;trt_cp;10 uM;24 h	1286	4	5.93931	0.661592	0.555397	0.714959	BRD-A18795974	trt_cp	10 uM	24 h	Neural Progenitor Cell
Neural Progenitor Cell;RU-24969;trt_cp;10 uM;24 h	1286	4	1.76812	0.223963	0.837126	0.908135	RU-24969	trt_cp	10 uM	24 h	Neural Progenitor Cell
Neural Progenitor Cell;BRD-K61463582;trt_cp;10 uM;24 h	1286	3	15.0349	1.43087	0.288545	0.490573	BRD-K61463582	trt_cp	10 uM	24 h	Neural Progenitor Cell
Neural Progenitor Cell;BRD-K47535255;trt_cp;10 uM;6 h	73	4	3.4017	0.565746	0.606572	0.753587	BRD-K47535255	trt_cp	10 uM	6 h	Neural Progenitor Cell
Neural Progenitor Cell;acitretin;trt_cp;10 uM;24 h	1286	5	-0.652957	-0.100022	0.925117	0.959601	acitretin	trt_cp	10 uM	24 h	Neural Progenitor Cell
Neural Progenitor Cell;pregnenolone;trt_cp;10 uM;24 h	1286	8	6.59207	1.12029	0.299335	0.500152	pregnenolone	trt_cp	10 uM	24 h	Neural Progenitor Cell
Adipose-derived Stem Cell;BRD-K91671201;trt_cp;10 uM;24 h	478	4	-4.11617	-2.46483	0.0851432	0.245092	BRD-K91671201	trt_cp	10 uM	24 h	Adipose-derived Stem Cell
Neural Progenitor Cell;NAS-181;trt_cp;10 uM;24 h	1286	3	-9.6409	-11.4014	0.002159	0.0223935	NAS-181	trt_cp	10 uM	24 h	Neural Progenitor Cell
Adipose-derived Stem Cell;BRD-K76274772;trt_cp;10 uM;24 h	478	3	-3.55802	-4.56955	0.023737	0.115686	BRD-K76274772	trt_cp	10 uM	24 h	Adipose-derived Stem Cell
Adipose-derived Stem Cell;pseudopelletierine;trt_cp;10 uM;24 h	478	3	-8.24818	-1.94716	0.189627	0.383638	pseudopelletierine	trt_cp	10 uM	24 h	Adipose-derived Stem Cell
Neural Progenitor Cell;tripelennamine;trt_cp;10 uM;24 h	1286	3	-5.19285	-1.35495	0.306577	0.507037	tripelennamine	trt_cp	10 uM	24 h	Neural Progenitor Cell
Neural Progenitor Cell;ZK-93426;trt_cp;10 uM;24 h	1286	3	-2.46512	-2.04191	0.15996	0.349754	ZK-93426	trt_cp	10 uM	24 h	Neural Progenitor Cell
Adipose-derived Stem Cell;RAN-02;trt_cp;10 uM;24 h	478	3	-6.44014	-4.03725	0.0498577	0.180116	RAN-02	trt_cp	10 uM	24 h	Adipose-derived Stem Cell
Adipose-derived Stem Cell;GR-32191;trt_cp;10 uM;24 h	478	4	-7.51127	-2.54352	0.0827256	0.240873	GR-32191	trt_cp	10 uM	24 h	Adipose-derived Stem Cell
Adipose-derived Stem Cell;BRD-K90446118;trt_cp;10 uM;24 h	478	4	-6.74539	-2.40916	0.093146	0.25774	BRD-K90446118	trt_cp	10 uM	24 h	Adipose-derived Stem Cell
Adipose-derived Stem Cell;BRD-K46558254;trt_cp;10 uM;24 h	478	4	-5.18655	-1.83817	0.161286	0.351007	BRD-K46558254	trt_cp	10 uM	24 h	Adipose-derived Stem Cell
Neural Progenitor Cell;PLX-4720;trt_cp;10 uM;24 h	1286	3	-7.88459	-3.70772	0.0610854	0.202365	PLX-4720	trt_cp	10 uM	24 h	Neural Progenitor Cell
Adipose-derived Stem Cell;sirolimus;trt_cp;10 uM;24 h	478	20	0.442672	0.298269	0.768481	0.865954	sirolimus	trt_cp	10 uM	24 h	Adipose-derived Stem Cell
Adipose-derived Stem Cell;BRD-K47731572;trt_cp;10 uM;24 h	478	3	-7.82443	-2.27523	0.148796	0.335512	BRD-K47731572	trt_cp	10 uM	24 h	Adipose-derived Stem Cell
Adipose-derived Stem Cell;nTZDpa;trt_cp;10 uM;24 h	478	3	-4.01091	-4.58414	0.0272762	0.125967	nTZDpa	trt_cp	10 uM	24 h	Adipose-derived Stem Cell
Adipose-derived Stem Cell;ubenimex;trt_cp;10 uM;24 h	478	3	-4.6294	-1.48774	0.273037	0.475835	ubenimex	trt_cp	10 uM	24 h	Adipose-derived Stem Cell
Adipose-derived Stem Cell;LY-278584;trt_cp;10 uM;24 h	478	3	-8.79398	-3.05991	0.0898214	0.252482	LY-278584	trt_cp	10 uM	24 h	Adipose-derived Stem Cell
Adipose-derived Stem Cell;decafluorobutane;trt_cp;10 uM;24 h	478	3	-2.6048	-1.40453	0.289394	0.491443	decafluorobutane	trt_cp	10 uM	24 h	Adipose-derived Stem Cell
Adipose-derived Stem Cell;BRD-K82971429;trt_cp;10 uM;24 h	478	4	-2.64522	-4.80746	0.00296266	0.0282769	BRD-K82971429	trt_cp	10 uM	24 h	Adipose-derived Stem Cell
Neural Progenitor Cell;tetradecylthioacetic-acid;trt_cp;10 uM;24 h	1286	4	10.6792	0.942929	0.415177	0.6039	tetradecylthioacetic-acid	trt_cp	10 uM	24 h	Neural Progenitor Cell
Neural Progenitor Cell;TC-1;trt_cp;10 uM;24 h	1286	4	-6.28003	-1.58253	0.21049	0.40754	TC-1	trt_cp	10 uM	24 h	Neural Progenitor Cell
Adipose-derived Stem Cell;cyclosporin-a;trt_cp;10 uM;24 h	478	9	-3.84482	-1.74177	0.118358	0.29455	cyclosporin-a	trt_cp	10 uM	24 h	Adipose-derived Stem Cell
Adipose-derived Stem Cell;BRD-K52099002;trt_cp;10 uM;24 h	478	4	-5.06961	-5.85653	0.00472709	0.0398177	BRD-K52099002	trt_cp	10 uM	24 h	Adipose-derived Stem Cell
Adipose-derived Stem Cell;BRD-K95760042;trt_cp;10 uM;24 h	478	6	-1.38671	-1.51762	0.177853	0.37077	BRD-K95760042	trt_cp	10 uM	24 h	Adipose-derived Stem Cell
Adipose-derived Stem Cell;BRD-K51731619;trt_cp;10 uM;24 h	478	3	-7.69001	-4.43454	0.0423075	0.163985	BRD-K51731619	trt_cp	10 uM	24 h	Adipose-derived Stem Cell
Adipose-derived Stem Cell;BRD-A75471153;trt_cp;10 uM;24 h	478	4	-3.40101	-0.732355	0.516581	0.684911	BRD-A75471153	trt_cp	10 uM	24 h	Adipose-derived Stem Cell
Epithelial Cell;raloxifene;trt_cp;10 uM;24 h	4104	19	18.5053	6.58883	3.39514e-06	0.00013116	raloxifene	trt_cp	10 uM	24 h	Epithelial Cell
Neural Progenitor Cell;BRD-A00763758;trt_cp;10 uM;6 h	73	4	-6.53189	-0.999815	0.384008	0.576507	BRD-A00763758	trt_cp	10 uM	6 h	Neural Progenitor Cell
Neural Progenitor Cell;wortmannin;trt_cp;10 uM;6 h	73	6	0.920457	0.13676	0.896046	0.942607	wortmannin	trt_cp	10 uM	6 h	Neural Progenitor Cell
Neural Progenitor Cell;tranylcypromine;trt_cp;10 uM;24 h	1286	16	-1.9069	-0.502417	0.622565	0.765235	tranylcypromine	trt_cp	10 uM	24 h	Neural Progenitor Cell
Neural Progenitor Cell;BRD-K64729807;trt_cp;10 uM;24 h	1286	5	6.702	0.763018	0.487862	0.662478	BRD-K64729807	trt_cp	10 uM	24 h	Neural Progenitor Cell
Neural Progenitor Cell;BRD-K25701726;trt_cp;10 uM;24 h	1286	3	13.4748	1.39751	0.296848	0.49796	BRD-K25701726	trt_cp	10 uM	24 h	Neural Progenitor Cell
Neural Progenitor Cell;carbamazepine;trt_cp;10 uM;24 h	1286	3	13.4466	1.07712	0.393963	0.585428	carbamazepine	trt_cp	10 uM	24 h	Neural Progenitor Cell
Neural Progenitor Cell;BRD-A96799240;trt_cp;10 uM;24 h	1286	6	6.52135	0.632115	0.555032	0.714819	BRD-A96799240	trt_cp	10 uM	24 h	Neural Progenitor Cell
Neural Progenitor Cell;methoxypyruvic-acid;trt_cp;10 uM;6 h	73	4	-7.26372	-1.06936	0.356349	0.553767	methoxypyruvic-acid	trt_cp	10 uM	6 h	Neural Progenitor Cell
Neural Progenitor Cell;tunicamycin;trt_cp;10 uM;24 h	1286	3	-2.48581	-0.63783	0.588081	0.739427	tunicamycin	trt_cp	10 uM	24 h	Neural Progenitor Cell
Neural Progenitor Cell;SB-202190;trt_cp;10 uM;24 h	1286	4	14.6938	1.32906	0.275724	0.478298	SB-202190	trt_cp	10 uM	24 h	Neural Progenitor Cell
Neural Progenitor Cell;PD-149163;trt_cp;10 uM;6 h	73	3	-12.6044	-4.54523	0.0101162	0.0671009	PD-149163	trt_cp	10 uM	6 h	Neural Progenitor Cell
Neural Progenitor Cell;BRD-A41114263;trt_cp;10 uM;24 h	1286	3	-10.9926	-15.2757	0.000470271	0.00673361	BRD-A41114263	trt_cp	10 uM	24 h	Neural Progenitor Cell
Adipose-derived Stem Cell;KM-03439;trt_cp;10 uM;24 h	478	3	-0.941366	-0.278519	0.806409	0.889914	KM-03439	trt_cp	10 uM	24 h	Adipose-derived Stem Cell
Adipose-derived Stem Cell;endecaphyllin-x;trt_cp;10 uM;24 h	478	3	-0.243063	-0.154367	0.890598	0.939334	endecaphyllin-x	trt_cp	10 uM	24 h	Adipose-derived Stem Cell
Neural Progenitor Cell;BRD-K76274772;trt_cp;10 uM;24 h	1286	3	-4.92119	-6.10533	0.0103008	0.0680159	BRD-K76274772	trt_cp	10 uM	24 h	Neural Progenitor Cell
Adipose-derived Stem Cell;BRD-K75903201;trt_cp;10 uM;24 h	478	4	-5.24473	-1.9207	0.148349	0.334959	BRD-K75903201	trt_cp	10 uM	24 h	Adipose-derived Stem Cell
Neural Progenitor Cell;eicosatetraynoic-acid;trt_cp;10 uM;24 h	1286	6	7.77239	1.08056	0.329045	0.528418	eicosatetraynoic-acid	trt_cp	10 uM	24 h	Neural Progenitor Cell
Neural Progenitor Cell;verapamil;trt_cp;10 uM;24 h	1286	4	5.73653	0.567125	0.610216	0.756244	verapamil	trt_cp	10 uM	24 h	Neural Progenitor Cell
Adipose-derived Stem Cell;lobelanidine;trt_cp;10 uM;24 h	478	4	-6.52056	-2.87624	0.0611181	0.202431	lobelanidine	trt_cp	10 uM	24 h	Adipose-derived Stem Cell
Neural Progenitor Cell;PSB-11;trt_cp;10 uM;24 h	1286	3	-8.30188	-2.93643	0.096015	0.262117	PSB-11	trt_cp	10 uM	24 h	Neural Progenitor Cell
Adipose-derived Stem Cell;BRD-K52678950;trt_cp;10 uM;24 h	478	3	-0.657835	-0.330738	0.771034	0.867515	BRD-K52678950	trt_cp	10 uM	24 h	Adipose-derived Stem Cell
Adipose-derived Stem Cell;BRD-K09661167;trt_cp;10 uM;24 h	478	3	2.12599	6.10296	1.54907e-06	6.89148e-05	BRD-K09661167	trt_cp	10 uM	24 h	Adipose-derived Stem Cell
Epithelial Cell;HDAC3-selective;trt_cp;10 uM;6 h	585	5	-16.0199	-10.9887	0.000136752	0.00259413	HDAC3-selective	trt_cp	10 uM	6 h	Epithelial Cell
Adipose-derived Stem Cell;L-689560;trt_cp;10 uM;24 h	478	7	-4.30688	-2.10464	0.0780192	0.233222	L-689560	trt_cp	10 uM	24 h	Adipose-derived Stem Cell
Neural Progenitor Cell;vorinostat;trt_cp;10 uM;24 h	1286	59	12.5439	14.8494	1.202e-24	1.13453e-21	vorinostat	trt_cp	10 uM	24 h	Neural Progenitor Cell
Adipose-derived Stem Cell;BRD-K72505034;trt_cp;10 uM;24 h	478	4	-1.98465	-1.69097	0.177891	0.370829	BRD-K72505034	trt_cp	10 uM	24 h	Adipose-derived Stem Cell
Adipose-derived Stem Cell;BRD-K62459624;trt_cp;10 uM;24 h	478	5	1.37683	0.260566	0.807214	0.89038	BRD-K62459624	trt_cp	10 uM	24 h	Adipose-derived Stem Cell
Adipose-derived Stem Cell;methantheline;trt_cp;10 uM;24 h	478	3	-2.9408	-1.80624	0.20423	0.400351	methantheline	trt_cp	10 uM	24 h	Adipose-derived Stem Cell
Epithelial Cell;BRD-K26510616;trt_cp;10 uM;24 h	4104	3	20.4799	28.2551	0.000947949	0.0117575	BRD-K26510616	trt_cp	10 uM	24 h	Epithelial Cell
Epithelial Cell;BRD-A79545933;trt_cp;10 uM;6 h	585	3	15.9023	10.5273	0.00478044	0.0401412	BRD-A79545933	trt_cp	10 uM	6 h	Epithelial Cell
Fibroblast;dexketoprofen;trt_cp;10 uM;24 h	329	11	5.62762	1.26673	0.233153	0.433112	dexketoprofen	trt_cp	10 uM	24 h	Fibroblast
Fibroblast;zibotentan;trt_cp;10 uM;24 h	329	12	0.38755	0.115783	0.909807	0.950667	zibotentan	trt_cp	10 uM	24 h	Fibroblast
Epithelial Cell;SA-1922257;trt_cp;10 uM;24 h	4104	3	2.64299	1.34142	0.311056	0.511538	SA-1922257	trt_cp	10 uM	24 h	Epithelial Cell
Fibroblast;rivaroxaban;trt_cp;10 uM;24 h	329	11	4.05438	1.14635	0.277161	0.479625	rivaroxaban	trt_cp	10 uM	24 h	Fibroblast
Epithelial Cell;KI-8751;trt_cp;10 uM;24 h	4104	7	-1.31654	-0.291635	0.780373	0.873549	KI-8751	trt_cp	10 uM	24 h	Epithelial Cell
Fibroblast;ciglitazone;trt_cp;10 uM;24 h	329	12	-0.0558448	-0.0203358	0.984113	0.991695	ciglitazone	trt_cp	10 uM	24 h	Fibroblast
Fibroblast;tenovins;trt_cp;10 uM;24 h	329	11	8.60007	3.47273	0.00521141	0.0427125	tenovins	trt_cp	10 uM	24 h	Fibroblast
Epithelial Cell;BIBX-1382;trt_cp;10 uM;24 h	4104	8	2.47682	0.566354	0.588818	0.739786	BIBX-1382	trt_cp	10 uM	24 h	Epithelial Cell
Fibroblast;clofibric-acid;trt_cp;10 uM;24 h	329	12	1.79123	0.705056	0.494183	0.667428	clofibric-acid	trt_cp	10 uM	24 h	Fibroblast
Fibroblast;tyrphostin-1;trt_cp;10 uM;24 h	329	11	1.50347	0.464486	0.651719	0.787243	tyrphostin-1	trt_cp	10 uM	24 h	Fibroblast
Epithelial Cell;SA-1922261;trt_cp;10 uM;24 h	4104	3	11.1765	5.58747	0.0301247	0.134117	SA-1922261	trt_cp	10 uM	24 h	Epithelial Cell
Fibroblast;GW-583340;trt_cp;10 uM;24 h	329	11	4.843	1.42228	0.183929	0.377555	GW-583340	trt_cp	10 uM	24 h	Fibroblast
Epithelial Cell;QL-XII-47;trt_cp;10 uM;24 h	4104	3	2.78876	0.670194	0.571665	0.727418	QL-XII-47	trt_cp	10 uM	24 h	Epithelial Cell
Epithelial Cell;BRD-M54407015;trt_cp;10 uM;24 h	4104	3	4.3621	2.05708	0.17521	0.36799	BRD-M54407015	trt_cp	10 uM	24 h	Epithelial Cell
Epithelial Cell;BRD-K88114291;trt_cp;10 uM;24 h	4104	3	10.257	8.49372	0.012857	0.078566	BRD-K88114291	trt_cp	10 uM	24 h	Epithelial Cell
Epithelial Cell;BRD-K48225424;trt_cp;10 uM;24 h	4104	3	3.90167	1.19295	0.354967	0.552346	BRD-K48225424	trt_cp	10 uM	24 h	Epithelial Cell
Epithelial Cell;alisertib;trt_cp;10 uM;24 h	4104	29	5.17045	2.59316	0.0149139	0.0864189	alisertib	trt_cp	10 uM	24 h	Epithelial Cell
Epithelial Cell;JQ-1-R;trt_cp;10 uM;24 h	4104	4	-11.6049	-8.0291	0.00385303	0.0341955	JQ-1-R	trt_cp	10 uM	24 h	Epithelial Cell
Epithelial Cell;K-788-2192;trt_cp;10 uM;24 h	4104	6	-5.76033	-3.89135	0.0112444	0.0720624	K-788-2192	trt_cp	10 uM	24 h	Epithelial Cell
Epithelial Cell;BRD-K40328231;trt_cp;10 uM;24 h	4104	3	-5.00625	-2.13495	0.16571	0.356106	BRD-K40328231	trt_cp	10 uM	24 h	Epithelial Cell
Bone Marrow Stem Cell;BRD-K09991945;trt_cp;10 uM;24 h	331	5	-4.10635	-1.58938	0.184331	0.378072	BRD-K09991945	trt_cp	10 uM	24 h	Bone Marrow Stem Cell
Epithelial Cell;PD-0325901;trt_cp;10 uM;24 h	4104	16	-0.547755	-0.188008	0.853382	0.918097	PD-0325901	trt_cp	10 uM	24 h	Epithelial Cell
Epithelial Cell;troglitazone;trt_cp;10 uM;24 h	4104	53	3.31392	3.39472	0.00130156	0.0151667	troglitazone	trt_cp	10 uM	24 h	Epithelial Cell
Bone Marrow Stem Cell;daminozide;trt_cp;10 uM;24 h	331	4	2.77911	0.523786	0.636338	0.775788	daminozide	trt_cp	10 uM	24 h	Bone Marrow Stem Cell
Epithelial Cell;BRD-K78124620;trt_cp;10 uM;24 h	4104	3	-7.61102	-9.91332	0.00861877	0.0604761	BRD-K78124620	trt_cp	10 uM	24 h	Epithelial Cell
Neural Progenitor Cell;bosutinib;trt_cp;10 uM;24 h	1286	7	9.40933	1.40021	0.210761	0.407915	bosutinib	trt_cp	10 uM	24 h	Neural Progenitor Cell
Neural Progenitor Cell;GNF-2;trt_cp;10 uM;24 h	1286	10	-6.66234	-6.57723	3.71599e-05	0.000922999	GNF-2	trt_cp	10 uM	24 h	Neural Progenitor Cell
Epithelial Cell;maxacalcitol;trt_cp;0.2 uM;24 h	4104	3	0.65448	0.14164	0.90033	0.945261	maxacalcitol	trt_cp	0.2 uM	24 h	Epithelial Cell
Epithelial Cell;blebbistatin;trt_cp;40 uM;6 h	585	5	-0.774935	-0.560982	0.599394	0.747648	blebbistatin	trt_cp	40 uM	6 h	Epithelial Cell
Epithelial Cell;BRD-K28100108;trt_cp;15 uM;6 h	585	4	-3.04168	-2.55285	0.0633663	0.206588	BRD-K28100108	trt_cp	15 uM	6 h	Epithelial Cell
Epithelial Cell;RG-108;trt_cp;80 uM;6 h	585	4	-3.23378	-1.14397	0.332155	0.531305	RG-108	trt_cp	80 uM	6 h	Epithelial Cell
Epithelial Cell;DL-PDMP;trt_cp;60 uM;6 h	585	5	-4.89761	-1.92923	0.121836	0.299218	DL-PDMP	trt_cp	60 uM	6 h	Epithelial Cell
Epithelial Cell;BRD-K51781482;trt_cp;6.66 uM;6 h	585	4	0.178176	0.0861663	0.936326	0.965408	BRD-K51781482	trt_cp	6.66 uM	6 h	Epithelial Cell
Epithelial Cell;ursolic-acid;trt_cp;70 uM;6 h	585	5	-11.0318	-9.77996	0.000110099	0.00220595	ursolic-acid	trt_cp	70 uM	6 h	Epithelial Cell
Epithelial Cell;indometacin;trt_cp;100 uM;24 h	4104	3	14.5384	7.63694	0.0163795	0.0919649	indometacin	trt_cp	100 uM	24 h	Epithelial Cell
Epithelial Cell;4-AMINOPHENOL;trt_cp;320 uM;6 h	585	3	25.2788	17.546	0.00131492	0.0152714	4-AMINOPHENOL	trt_cp	320 uM	6 h	Epithelial Cell
Epithelial Cell;dfcl-cys;trt_cp;100 uM;24 h	4104	3	22.8403	4.98939	0.0378052	0.153538	dfcl-cys	trt_cp	100 uM	24 h	Epithelial Cell
Epithelial Cell;BRD-A13806944;trt_cp;320 uM;24 h	4104	3	24.0705	14.8339	0.00433237	0.0373217	BRD-A13806944	trt_cp	320 uM	24 h	Epithelial Cell
Neural Progenitor Cell;BRD-K89997465;trt_cp;25 uM;24 h	1286	14	6.67101	3.13972	0.00744557	0.0546506	BRD-K89997465	trt_cp	25 uM	24 h	Neural Progenitor Cell
Epithelial Cell;salermide;trt_cp;125 uM;6 h	585	5	-8.5429	-4.34285	0.00980376	0.0656397	salermide	trt_cp	125 uM	6 h	Epithelial Cell
Epithelial Cell;zileuton;trt_cp;150 uM;6 h	585	5	-0.897949	-0.303603	0.775955	0.870668	zileuton	trt_cp	150 uM	6 h	Epithelial Cell
Epithelial Cell;necrostatin-1;trt_cp;150 uM;6 h	585	5	-1.74361	-1.17487	0.295235	0.496558	necrostatin-1	trt_cp	150 uM	6 h	Epithelial Cell
Epithelial Cell;BRD-A38479395;trt_cp;100 uM;6 h	585	3	24.8941	3.94483	0.0577645	0.19597	BRD-A38479395	trt_cp	100 uM	6 h	Epithelial Cell
Epithelial Cell;paraquat;trt_cp;1000 uM;6 h	585	3	20.6529	10.44	0.00640189	0.049485	paraquat	trt_cp	1000 uM	6 h	Epithelial Cell
Epithelial Cell;paracetamol;trt_cp;100 uM;6 h	585	3	21.1927	6.20329	0.0231092	0.113828	paracetamol	trt_cp	100 uM	6 h	Epithelial Cell
Epithelial Cell;sulfamethoxazole;trt_cp;100 uM;24 h	4104	3	26.6452	16.5732	0.00346498	0.0316277	sulfamethoxazole	trt_cp	100 uM	24 h	Epithelial Cell
Epithelial Cell;4-AMINOPHENOL;trt_cp;320 uM;24 h	4104	3	6.76889	3.38016	0.0767889	0.231209	4-AMINOPHENOL	trt_cp	320 uM	24 h	Epithelial Cell
Epithelial Cell;allopurinol;trt_cp;30 uM;24 h	4104	3	26.207	15.1253	0.00418789	0.0364268	allopurinol	trt_cp	30 uM	24 h	Epithelial Cell
Epithelial Cell;mannitol;trt_cp;30 uM;6 h	585	3	17.0803	4.46777	0.044446	0.168631	mannitol	trt_cp	30 uM	6 h	Epithelial Cell
Epithelial Cell;fluorouracil;trt_cp;30 uM;24 h	4104	3	34.1051	11.658	0.00719716	0.0534666	fluorouracil	trt_cp	30 uM	24 h	Epithelial Cell
Epithelial Cell;camptothecin;trt_cp;30 uM;24 h	4104	3	31.5195	22.8568	0.00178165	0.0192872	camptothecin	trt_cp	30 uM	24 h	Epithelial Cell
Epithelial Cell;amphotericin;trt_cp;100 uM;6 h	585	3	21.4136	12.1335	0.00416008	0.0362934	amphotericin	trt_cp	100 uM	6 h	Epithelial Cell
Epithelial Cell;kenpaullone;trt_cp;0.06 uM;24 h	4104	3	4.11387	1.99983	0.182739	0.376307	kenpaullone	trt_cp	0.06 uM	24 h	Epithelial Cell
Epithelial Cell;kenpaullone;trt_cp;1.67 uM;24 h	4104	3	1.50095	0.756881	0.527678	0.693717	kenpaullone	trt_cp	1.67 uM	24 h	Epithelial Cell
Neural Progenitor Cell;BG-1005;trt_cp;1.25 uM;24 h	1286	14	17.3507	16.2678	2.82857e-11	4.59451e-09	BG-1005	trt_cp	1.25 uM	24 h	Neural Progenitor Cell
Neural Progenitor Cell;valproic-acid;trt_cp;2500 uM;24 h	1286	14	13.3024	10.5496	2.63069e-08	1.93822e-06	valproic-acid	trt_cp	2500 uM	24 h	Neural Progenitor Cell
Neural Progenitor Cell;citalopram;trt_cp;25 uM;24 h	1286	15	12.436	4.83621	0.00024149	0.00401024	citalopram	trt_cp	25 uM	24 h	Neural Progenitor Cell
Neural Progenitor Cell;tacedinaline;trt_cp;0.3 uM;24 h	1286	12	15.5962	16.1322	2.03892e-10	2.57325e-08	tacedinaline	trt_cp	0.3 uM	24 h	Neural Progenitor Cell
Neural Progenitor Cell;bizine;trt_cp;25 uM;24 h	1286	14	12.6765	5.66008	6.64324e-05	0.00147116	bizine	trt_cp	25 uM	24 h	Neural Progenitor Cell
Epithelial Cell;APO-866;trt_cp;0.3 uM;6 h	585	5	-2.1943	-1.19269	0.292265	0.494036	APO-866	trt_cp	0.3 uM	6 h	Epithelial Cell
Epithelial Cell;JZL-184;trt_cp;12 uM;6 h	585	5	-5.04323	-3.01607	0.0328913	0.141758	JZL-184	trt_cp	12 uM	6 h	Epithelial Cell
Epithelial Cell;BRD-K10882151;trt_cp;40 uM;6 h	585	4	-1.1866	-0.644864	0.560337	0.718564	BRD-K10882151	trt_cp	40 uM	6 h	Epithelial Cell
Epithelial Cell;capsaicin;trt_cp;150 uM;6 h	585	5	-2.82281	-2.95573	0.0238246	0.11593	capsaicin	trt_cp	150 uM	6 h	Epithelial Cell
Epithelial Cell;DC-45-A2;trt_cp;12 uM;6 h	585	5	-3.76442	-1.73486	0.152159	0.340064	DC-45-A2	trt_cp	12 uM	6 h	Epithelial Cell
Epithelial Cell;pioglitazone;trt_cp;0.3 uM;6 h	585	3	17.4377	15.574	0.000890874	0.011209	pioglitazone	trt_cp	0.3 uM	6 h	Epithelial Cell
Epithelial Cell;BRD-A20239487;trt_cp;30 uM;24 h	4104	3	19.2114	7.71276	0.0162029	0.0914831	BRD-A20239487	trt_cp	30 uM	24 h	Epithelial Cell
Epithelial Cell;curcumin;trt_cp;12 uM;24 h	4104	3	24.1562	8.42016	0.0136816	0.0819558	curcumin	trt_cp	12 uM	24 h	Epithelial Cell
Epithelial Cell;4-AMINOPHENOL;trt_cp;100 uM;24 h	4104	3	25.3708	9.72321	0.0102819	0.0679293	4-AMINOPHENOL	trt_cp	100 uM	24 h	Epithelial Cell
Epithelial Cell;BRD-K61498099;trt_cp;0.5 uM;24 h	4104	3	-5.24442	-1.18131	0.358783	0.555719	BRD-K61498099	trt_cp	0.5 uM	24 h	Epithelial Cell
Epithelial Cell;kenpaullone;trt_cp;0.5 uM;24 h	4104	3	3.02652	1.30503	0.321296	0.52121	kenpaullone	trt_cp	0.5 uM	24 h	Epithelial Cell
Epithelial Cell;sorafenib;trt_cp;100 uM;6 h	585	3	20.6985	14.1374	0.00227182	0.0232311	sorafenib	trt_cp	100 uM	6 h	Epithelial Cell
Neural Progenitor Cell;agomelatine;trt_cp;12.5 uM;24 h	1286	13	13.2561	5.97412	5.41095e-05	0.00124566	agomelatine	trt_cp	12.5 uM	24 h	Neural Progenitor Cell
Epithelial Cell;DL-TBOA;trt_cp;150 uM;24 h	4104	3	-6.11663	-4.10054	0.0535596	0.187314	DL-TBOA	trt_cp	150 uM	24 h	Epithelial Cell
Epithelial Cell;TG-101348;trt_cp;12 uM;6 h	585	5	-0.38517	-0.154344	0.884389	0.936237	TG-101348	trt_cp	12 uM	6 h	Epithelial Cell
Epithelial Cell;curcumin;trt_cp;12.5 uM;6 h	585	5	-3.2568	-1.61238	0.175759	0.368606	curcumin	trt_cp	12.5 uM	6 h	Epithelial Cell
Epithelial Cell;tosedostat;trt_cp;80 uM;6 h	585	5	-3.99087	-2.20261	0.0848538	0.244662	tosedostat	trt_cp	80 uM	6 h	Epithelial Cell
Epithelial Cell;AR-C133057XX;trt_cp;12 uM;6 h	585	5	-5.07512	-2.94588	0.0358689	0.149107	AR-C133057XX	trt_cp	12 uM	6 h	Epithelial Cell
Epithelial Cell;citrinin;trt_cp;30 uM;6 h	585	3	15.4633	5.29916	0.03071	0.135752	citrinin	trt_cp	30 uM	6 h	Epithelial Cell
Epithelial Cell;afatinib;trt_cp;30 uM;6 h	585	3	21.6077	17.8914	0.00079755	0.0102664	afatinib	trt_cp	30 uM	6 h	Epithelial Cell
Epithelial Cell;diatrizoic-acid;trt_cp;32000 uM;24 h	4104	3	20.6811	7.87143	0.0155881	0.0890678	diatrizoic-acid	trt_cp	32000 uM	24 h	Epithelial Cell
Epithelial Cell;sulfamethoxazole;trt_cp;30 uM;6 h	585	3	15.7794	3.84358	0.0593543	0.199138	sulfamethoxazole	trt_cp	30 uM	6 h	Epithelial Cell
Epithelial Cell;lead-acetate;trt_cp;1000 uM;24 h	4104	3	21.7236	9.03566	0.0118579	0.0745442	lead-acetate	trt_cp	1000 uM	24 h	Epithelial Cell
Epithelial Cell;methylparaben;trt_cp;100 uM;6 h	585	3	15.6184	8.95408	0.00810551	0.0579816	methylparaben	trt_cp	100 uM	6 h	Epithelial Cell
Epithelial Cell;maxacalcitol;trt_cp;0.06 uM;24 h	4104	3	0.914363	0.168807	0.881464	0.934506	maxacalcitol	trt_cp	0.06 uM	24 h	Epithelial Cell
Epithelial Cell;APO-866;trt_cp;0.3 uM;24 h	4104	3	-7.33028	-8.04773	0.0137442	0.0822041	APO-866	trt_cp	0.3 uM	24 h	Epithelial Cell
Epithelial Cell;zebularine;trt_cp;12 uM;6 h	585	5	-1.81502	-1.16001	0.30165	0.50232	zebularine	trt_cp	12 uM	6 h	Epithelial Cell
Epithelial Cell;EX-527;trt_cp;25 uM;6 h	585	5	-0.848026	-0.717372	0.503313	0.67467	EX-527	trt_cp	25 uM	6 h	Epithelial Cell
Epithelial Cell;rifampicin;trt_cp;30 uM;24 h	4104	3	21.8423	29.0353	0.000913922	0.0114357	rifampicin	trt_cp	30 uM	24 h	Epithelial Cell
Epithelial Cell;lead-acetate;trt_cp;320 uM;6 h	585	3	16.9856	2.85049	0.102947	0.272777	lead-acetate	trt_cp	320 uM	6 h	Epithelial Cell
Epithelial Cell;lapatinib;trt_cp;30 uM;24 h	4104	3	17.0563	12.5077	0.00600183	0.0471545	lapatinib	trt_cp	30 uM	24 h	Epithelial Cell
Epithelial Cell;furosemide;trt_cp;30 uM;6 h	585	3	16.4969	21.8238	1.10945e-05	0.000343499	furosemide	trt_cp	30 uM	6 h	Epithelial Cell
Epithelial Cell;troglitazone;trt_cp;0.3 uM;6 h	585	3	22.5955	10.1027	0.00742671	0.0545454	troglitazone	trt_cp	0.3 uM	6 h	Epithelial Cell
Epithelial Cell;penitrem-a;trt_cp;0.22 uM;24 h	4104	3	-5.18068	-3.06367	0.0910256	0.254418	penitrem-a	trt_cp	0.22 uM	24 h	Epithelial Cell
Epithelial Cell;BRD-K29254075;trt_cp;1.25 uM;24 h	4104	3	-7.64902	-1.17208	0.36182	0.558021	BRD-K29254075	trt_cp	1.25 uM	24 h	Epithelial Cell
Neural Progenitor Cell;TG-101348;trt_cp;8 uM;6 h	73	3	2.21074	0.909832	0.402253	0.593099	TG-101348	trt_cp	8 uM	6 h	Neural Progenitor Cell
Epithelial Cell;troglitazone;trt_cp;100 uM;6 h	585	3	24.3794	17.7823	0.00114398	0.0137006	troglitazone	trt_cp	100 uM	6 h	Epithelial Cell
Epithelial Cell;omeprazole;trt_cp;1000 uM;6 h	585	3	21.0169	5.13274	0.0342715	0.145622	omeprazole	trt_cp	1000 uM	6 h	Epithelial Cell
Epithelial Cell;arsenic-trioxide;trt_cp;320 uM;24 h	4104	3	14.0658	23.1659	0.00128316	0.0150019	arsenic-trioxide	trt_cp	320 uM	24 h	Epithelial Cell
Neural Progenitor Cell;sertraline;trt_cp;1.67 uM;24 h	1286	14	14.0316	5.25363	0.000141354	0.00265975	sertraline	trt_cp	1.67 uM	24 h	Neural Progenitor Cell
Epithelial Cell;BIBR-1532;trt_cp;80 uM;6 h	585	5	-3.72443	-1.87603	0.127225	0.306771	BIBR-1532	trt_cp	80 uM	6 h	Epithelial Cell
Epithelial Cell;lovastatin;trt_cp;40 uM;6 h	585	5	-0.348556	-0.182947	0.86288	0.923433	lovastatin	trt_cp	40 uM	6 h	Epithelial Cell
Epithelial Cell;potassium-dichromate;trt_cp;100 uM;6 h	585	3	26.0932	6.65078	0.0205318	0.105743	potassium-dichromate	trt_cp	100 uM	6 h	Epithelial Cell
Epithelial Cell;sulfamethoxazole;trt_cp;320 uM;24 h	4104	3	24.8562	16.8906	0.00330663	0.0305795	sulfamethoxazole	trt_cp	320 uM	24 h	Epithelial Cell
Epithelial Cell;BRD-A44174994;trt_cp;30 uM;6 h	585	3	22.1581	6.88227	0.0185813	0.0993898	BRD-A44174994	trt_cp	30 uM	6 h	Epithelial Cell
Epithelial Cell;BRD-K13959223;trt_cp;0.3 uM;6 h	585	3	18.1026	6.73141	0.0186215	0.0995439	BRD-K13959223	trt_cp	0.3 uM	6 h	Epithelial Cell
Epithelial Cell;potassium-dichromate;trt_cp;0.3 uM;6 h	585	3	15.88	7.80402	0.01221	0.0761325	potassium-dichromate	trt_cp	0.3 uM	6 h	Epithelial Cell
Epithelial Cell;NPC26;trt_cp;0.05 uM;24 h	4104	3	2.95708	1.63158	0.243374	0.444108	NPC26	trt_cp	0.05 uM	24 h	Epithelial Cell
Epithelial Cell;BRD-K35716340;trt_cp;1.25 uM;24 h	4104	3	-3.54245	-1.59794	0.250506	0.452026	BRD-K35716340	trt_cp	1.25 uM	24 h	Epithelial Cell
Epithelial Cell;BRD-K13959223;trt_cp;100 uM;6 h	585	3	12.4158	3.78865	0.0597335	0.199739	BRD-K13959223	trt_cp	100 uM	6 h	Epithelial Cell
Epithelial Cell;BRD-K80863915;trt_cp;320 uM;6 h	585	3	19.934	8.31296	0.0115809	0.0734141	BRD-K80863915	trt_cp	320 uM	6 h	Epithelial Cell
Epithelial Cell;tcv-cys;trt_cp;30 uM;24 h	4104	3	25.1889	12.3917	0.00629749	0.0488529	tcv-cys	trt_cp	30 uM	24 h	Epithelial Cell
Epithelial Cell;penitrem-a;trt_cp;0.5 uM;24 h	4104	3	2.53461	3.32263	0.0750678	0.228004	penitrem-a	trt_cp	0.5 uM	24 h	Epithelial Cell
Epithelial Cell;BRD-K98404142;trt_cp;12 uM;24 h	4104	5	-2.0564	-0.628781	0.563534	0.720996	BRD-K98404142	trt_cp	12 uM	24 h	Epithelial Cell
Epithelial Cell;pemetrexed;trt_cp;90 uM;6 h	585	5	-1.06439	-0.756207	0.484401	0.659888	pemetrexed	trt_cp	90 uM	6 h	Epithelial Cell
Epithelial Cell;sunitinib;trt_cp;100 uM;6 h	585	3	21.0739	5.44332	0.0303989	0.134723	sunitinib	trt_cp	100 uM	6 h	Epithelial Cell
Epithelial Cell;650_0048_9503;trt_cp;0.2 uM;24 h	4104	3	2.13785	1.85491	0.202274	0.398175	650_0048_9503	trt_cp	0.2 uM	24 h	Epithelial Cell
Epithelial Cell;614_6900_7557;trt_cp;12.5 uM;24 h	4104	3	0.390845	0.255439	0.822018	0.899155	614_6900_7557	trt_cp	12.5 uM	24 h	Epithelial Cell
Epithelial Cell;tert-butylhydroquinone;trt_cp;12 uM;24 h	4104	3	29.4008	5.10075	0.0362932	0.149958	tert-butylhydroquinone	trt_cp	12 uM	24 h	Epithelial Cell
Epithelial Cell;BRD-A38479395;trt_cp;30 uM;6 h	585	3	24.8645	26.1094	8.09524e-05	0.00172174	BRD-A38479395	trt_cp	30 uM	6 h	Epithelial Cell
Epithelial Cell;allopurinol;trt_cp;320 uM;24 h	4104	3	22.4922	27.3973	0.00107584	0.0130096	allopurinol	trt_cp	320 uM	24 h	Epithelial Cell
Epithelial Cell;lapatinib;trt_cp;0.3 uM;24 h	4104	3	21.0739	61.2482	4.45989e-05	0.00106171	lapatinib	trt_cp	0.3 uM	24 h	Epithelial Cell
Neural Progenitor Cell;lithium-chloride;trt_cp;10000 uM;24 h	1286	11	18.0453	8.8771	3.27364e-06	0.000127881	lithium-chloride	trt_cp	10000 uM	24 h	Neural Progenitor Cell
Neural Progenitor Cell;fluvastatin;trt_cp;1.67 uM;24 h	1286	14	13.0833	4.96803	0.000234879	0.00392925	fluvastatin	trt_cp	1.67 uM	24 h	Neural Progenitor Cell
Neural Progenitor Cell;bizine;trt_cp;1.67 uM;24 h	1286	11	13.2117	5.76037	0.000156406	0.00287634	bizine	trt_cp	1.67 uM	24 h	Neural Progenitor Cell
Neural Progenitor Cell;rolipram;trt_cp;0.3 uM;24 h	1286	15	12.6723	4.85578	0.000233236	0.00391412	rolipram	trt_cp	0.3 uM	24 h	Neural Progenitor Cell
Epithelial Cell;amanitin;trt_cp;100 uM;24 h	4104	3	34.396	13.252	0.00556141	0.0447102	amanitin	trt_cp	100 uM	24 h	Epithelial Cell
Epithelial Cell;rifampicin;trt_cp;30 uM;6 h	585	3	22.0111	4.76904	0.0398587	0.15874	rifampicin	trt_cp	30 uM	6 h	Epithelial Cell
Epithelial Cell;mannitol;trt_cp;30 uM;24 h	4104	3	25.5306	7.40896	0.0176266	0.0960784	mannitol	trt_cp	30 uM	24 h	Epithelial Cell
Epithelial Cell;phenacetin;trt_cp;320 uM;6 h	585	3	15.6862	12.0833	0.00263667	0.0259016	phenacetin	trt_cp	320 uM	6 h	Epithelial Cell
Epithelial Cell;tomelukast;trt_cp;0.004 uM;24 h	4104	3	-2.29745	-0.912241	0.457597	0.638307	tomelukast	trt_cp	0.004 uM	24 h	Epithelial Cell
Neural Progenitor Cell;ziprasidone;trt_cp;6.66 uM;24 h	1286	14	14.1049	6.07309	3.33654e-05	0.000847422	ziprasidone	trt_cp	6.66 uM	24 h	Neural Progenitor Cell
Epithelial Cell;HDAC3-selective;trt_cp;1.25 uM;6 h	585	3	-12.5941	-11.4292	0.00197227	0.0208783	HDAC3-selective	trt_cp	1.25 uM	6 h	Epithelial Cell
Epithelial Cell;HDAC1-selective;trt_cp;0.3 uM;6 h	585	3	-13.2502	-7.89409	0.0103734	0.068327	HDAC1-selective	trt_cp	0.3 uM	6 h	Epithelial Cell
Epithelial Cell;colchicine;trt_cp;1000 uM;24 h	4104	3	21.6276	29.7225	0.000854282	0.0108488	colchicine	trt_cp	1000 uM	24 h	Epithelial Cell
Epithelial Cell;methylparaben;trt_cp;1000 uM;6 h	585	3	24.5409	5.51063	0.0300911	0.134023	methylparaben	trt_cp	1000 uM	6 h	Epithelial Cell
Epithelial Cell;methotrexate;trt_cp;1000 uM;6 h	585	3	19.0145	10.3764	0.00610436	0.0477773	methotrexate	trt_cp	1000 uM	6 h	Epithelial Cell
Epithelial Cell;BRD-K43206993;trt_cp;1.25 uM;24 h	4104	3	-2.37173	-1.11995	0.378595	0.571649	BRD-K43206993	trt_cp	1.25 uM	24 h	Epithelial Cell
Endothelial Cell;BRD-K47000838;trt_cp;1.25 uM;24 h	569	3	10.8082	5.68668	0.0281365	0.128547	BRD-K47000838	trt_cp	1.25 uM	24 h	Endothelial Cell
Epithelial Cell;7-nitroindazole;trt_cp;80 uM;6 h	585	5	0.338073	0.236968	0.822357	0.899329	7-nitroindazole	trt_cp	80 uM	6 h	Epithelial Cell
Epithelial Cell;dalcetrapib;trt_cp;80 uM;6 h	585	5	-3.81646	-1.5095	0.201632	0.397582	dalcetrapib	trt_cp	80 uM	6 h	Epithelial Cell
Epithelial Cell;BRD-K25690923;trt_cp;40 uM;6 h	585	5	-2.79756	-2.56496	0.0450723	0.17002	BRD-K25690923	trt_cp	40 uM	6 h	Epithelial Cell
Epithelial Cell;mannitol;trt_cp;1000 uM;6 h	585	3	21.8088	4.27395	0.0493441	0.178762	mannitol	trt_cp	1000 uM	6 h	Epithelial Cell
Epithelial Cell;citrinin;trt_cp;320 uM;6 h	585	3	15.1366	9.38926	0.00674072	0.0512868	citrinin	trt_cp	320 uM	6 h	Epithelial Cell
Epithelial Cell;BRD-A44251274;trt_cp;1000 uM;24 h	4104	3	21.0639	23.3069	0.00155906	0.0174902	BRD-A44251274	trt_cp	1000 uM	24 h	Epithelial Cell
Epithelial Cell;ibuprofen;trt_cp;320 uM;24 h	4104	3	19.0138	10.3414	0.00898104	0.0619607	ibuprofen	trt_cp	320 uM	24 h	Epithelial Cell
Epithelial Cell;dfcl-cys;trt_cp;320 uM;6 h	585	3	20.9294	3.68134	0.0653432	0.210569	dfcl-cys	trt_cp	320 uM	6 h	Epithelial Cell
Epithelial Cell;camptothecin;trt_cp;0.3 uM;6 h	585	3	33.7484	22.5969	0.000773169	0.0100328	camptothecin	trt_cp	0.3 uM	6 h	Epithelial Cell
Epithelial Cell;BRD-K61498099;trt_cp;0.06 uM;24 h	4104	3	-2.00615	-0.499695	0.666776	0.798061	BRD-K61498099	trt_cp	0.06 uM	24 h	Epithelial Cell
Epithelial Cell;ibuprofen;trt_cp;320 uM;6 h	585	3	19.1236	6.89859	0.0178635	0.0969457	ibuprofen	trt_cp	320 uM	6 h	Epithelial Cell
Epithelial Cell;BRD-U12060954;trt_cp;30 uM;24 h	4104	3	17.6197	11.4155	0.00729147	0.0539149	BRD-U12060954	trt_cp	30 uM	24 h	Epithelial Cell
Epithelial Cell;REV-5901;trt_cp;0.004 uM;24 h	4104	3	-2.47017	-1.0256	0.412507	0.601854	REV-5901	trt_cp	0.004 uM	24 h	Epithelial Cell
Epithelial Cell;BRD-K68552125;trt_cp;0.3 uM;24 h	4104	3	-0.832304	-0.338971	0.766789	0.864774	BRD-K68552125	trt_cp	0.3 uM	24 h	Epithelial Cell
Neural Progenitor Cell;BRD-A90543464;trt_cp;75 uM;24 h	1286	13	16.3642	7.48561	5.67961e-06	0.000198349	BRD-A90543464	trt_cp	75 uM	24 h	Neural Progenitor Cell
Epithelial Cell;maxacalcitol;trt_cp;1.67 uM;24 h	4104	3	1.32361	0.185823	0.869715	0.92764	maxacalcitol	trt_cp	1.67 uM	24 h	Epithelial Cell
Epithelial Cell;BRD-K51781482;trt_cp;6.66 uM;24 h	4104	3	-4.99163	-13.5885	0.0022744	0.0232384	BRD-K51781482	trt_cp	6.66 uM	24 h	Epithelial Cell
Epithelial Cell;curcumin;trt_cp;12.5 uM;24 h	4104	3	-1.75411	-0.926885	0.451223	0.633439	curcumin	trt_cp	12.5 uM	24 h	Epithelial Cell
Epithelial Cell;CI-976;trt_cp;80 uM;6 h	585	5	-1.32891	-0.706207	0.515215	0.683879	CI-976	trt_cp	80 uM	6 h	Epithelial Cell
Epithelial Cell;HDAC1-selective;trt_cp;1.25 uM;6 h	585	5	-12.4305	-6.96263	0.00140938	0.0160901	HDAC1-selective	trt_cp	1.25 uM	6 h	Epithelial Cell
Epithelial Cell;PCI-34051;trt_cp;1.25 uM;6 h	585	3	-15.8189	-21.5366	7.04447e-06	0.000238849	PCI-34051	trt_cp	1.25 uM	6 h	Epithelial Cell
Epithelial Cell;CD-437;trt_cp;12 uM;6 h	585	5	-2.14977	-1.18463	0.294955	0.496276	CD-437	trt_cp	12 uM	6 h	Epithelial Cell
Epithelial Cell;paracetamol;trt_cp;100 uM;24 h	4104	3	21.1253	28.7184	0.000923821	0.0115221	paracetamol	trt_cp	100 uM	24 h	Epithelial Cell
Epithelial Cell;BRD-A44251274;trt_cp;30 uM;24 h	4104	3	20.2257	6.2964	0.0241571	0.116832	BRD-A44251274	trt_cp	30 uM	24 h	Epithelial Cell
Epithelial Cell;620_7033_4267;trt_cp;0.05 uM;24 h	4104	3	-1.01702	-1.12739	0.373453	0.567416	620_7033_4267	trt_cp	0.05 uM	24 h	Epithelial Cell
Epithelial Cell;BRD-K03614649;trt_cp;0.2 uM;24 h	4104	3	0.130932	0.0927009	0.934493	0.964542	BRD-K03614649	trt_cp	0.2 uM	24 h	Epithelial Cell
Kidney Cell;acivicin;trt_cp;0.05 uM;24 h	1114	3	2.37923	6.27252	0.00794466	0.0571344	acivicin	trt_cp	0.05 uM	24 h	Kidney Cell
Epithelial Cell;BRD-K79382620;trt_cp;12 uM;6 h	585	5	-1.60782	-0.970839	0.379774	0.572414	BRD-K79382620	trt_cp	12 uM	6 h	Epithelial Cell
Epithelial Cell;lapatinib;trt_cp;100 uM;24 h	4104	3	15.4039	7.38592	0.0175482	0.0958621	lapatinib	trt_cp	100 uM	24 h	Epithelial Cell
Epithelial Cell;dexamethasone;trt_cp;100 uM;24 h	4104	3	19.851	3.87003	0.0606513	0.201553	dexamethasone	trt_cp	100 uM	24 h	Epithelial Cell
Epithelial Cell;BRD-A79545933;trt_cp;30 uM;6 h	585	3	20.4038	15.7696	0.0013415	0.0155284	BRD-A79545933	trt_cp	30 uM	6 h	Epithelial Cell
Epithelial Cell;entinostat;trt_cp;1.25 uM;6 h	585	3	-12.6369	-5.39843	0.0279876	0.128202	entinostat	trt_cp	1.25 uM	6 h	Epithelial Cell
Epithelial Cell;tetracycline;trt_cp;320 uM;24 h	4104	3	17.0302	6.19901	0.0248391	0.118862	tetracycline	trt_cp	320 uM	24 h	Epithelial Cell
Epithelial Cell;diatrizoic-acid;trt_cp;3200 uM;6 h	585	3	23.9598	5.36933	0.0316508	0.138271	diatrizoic-acid	trt_cp	3200 uM	6 h	Epithelial Cell
Epithelial Cell;rifampicin;trt_cp;320 uM;6 h	585	3	13.1889	5.71635	0.0247849	0.118697	rifampicin	trt_cp	320 uM	6 h	Epithelial Cell
Epithelial Cell;omeprazole;trt_cp;100 uM;24 h	4104	3	21.6986	30.1473	0.000823917	0.0105244	omeprazole	trt_cp	100 uM	24 h	Epithelial Cell
Epithelial Cell;indometacin;trt_cp;1000 uM;24 h	4104	3	17.4198	19.3977	0.00227062	0.0232311	indometacin	trt_cp	1000 uM	24 h	Epithelial Cell
Epithelial Cell;4-AMINOPHENOL;trt_cp;30 uM;24 h	4104	3	28.308	23.5622	0.00163838	0.0181526	4-AMINOPHENOL	trt_cp	30 uM	24 h	Epithelial Cell
Epithelial Cell;afatinib;trt_cp;100 uM;6 h	585	3	27.2901	4.97926	0.037089	0.151933	afatinib	trt_cp	100 uM	6 h	Epithelial Cell
Epithelial Cell;BRD-K80863915;trt_cp;1000 uM;6 h	585	3	21.5669	6.15897	0.023531	0.115185	BRD-K80863915	trt_cp	1000 uM	6 h	Epithelial Cell
Epithelial Cell;troglitazone;trt_cp;30 uM;24 h	4104	3	19.0394	5.47906	0.0315828	0.138043	troglitazone	trt_cp	30 uM	24 h	Epithelial Cell
Epithelial Cell;omeprazole;trt_cp;30 uM;6 h	585	3	23.126	7.19309	0.0169969	0.0940402	omeprazole	trt_cp	30 uM	6 h	Epithelial Cell
Epithelial Cell;tetracycline;trt_cp;30 uM;6 h	585	3	15.7883	3.60151	0.0671989	0.214064	tetracycline	trt_cp	30 uM	6 h	Epithelial Cell
Epithelial Cell;paraquat;trt_cp;100 uM;6 h	585	3	17.7926	3.77836	0.0617881	0.20403	paraquat	trt_cp	100 uM	6 h	Epithelial Cell
Epithelial Cell;rosiglitazone;trt_cp;80 uM;6 h	585	5	-0.804169	-0.69393	0.516421	0.684779	rosiglitazone	trt_cp	80 uM	6 h	Epithelial Cell
Epithelial Cell;PF-04217903;trt_cp;40 uM;6 h	585	5	-2.53791	-1.72705	0.147207	0.333385	PF-04217903	trt_cp	40 uM	6 h	Epithelial Cell
Epithelial Cell;purmorphamine;trt_cp;40 uM;6 h	585	5	-6.15166	-4.49236	0.00663664	0.0507159	purmorphamine	trt_cp	40 uM	6 h	Epithelial Cell
Epithelial Cell;MLN-4924;trt_cp;12 uM;6 h	585	5	-7.00299	-3.69127	0.0173726	0.0953931	MLN-4924	trt_cp	12 uM	6 h	Epithelial Cell
Epithelial Cell;cyanoquinoline-11;trt_cp;40 uM;6 h	585	5	0.692812	0.414312	0.697264	0.818368	cyanoquinoline-11	trt_cp	40 uM	6 h	Epithelial Cell
Epithelial Cell;BRD-K68336408;trt_cp;60 uM;6 h	585	5	-5.54877	-2.69718	0.0492801	0.178657	BRD-K68336408	trt_cp	60 uM	6 h	Epithelial Cell
Epithelial Cell;MST-312;trt_cp;12 uM;6 h	585	5	-2.70649	-1.2406	0.277664	0.480161	MST-312	trt_cp	12 uM	6 h	Epithelial Cell
[truncated: 32,925 more rows]
