# Supplementary material for: REVIVE: a computational platform for systematically identifying rejuvenating chemical and genetic perturbations
Source: Aging (Albany NY). 2025 Nov 25;17(11):2844–58. doi: 10.18632/aging.206342 (PMC12705183; doi:10.18632/aging.206342)
Supplement: Supplementary Table 9 [file aging-17-11-206342-s010.xlsx]

## Sheet: Sheet1
Supplementary Table 9. Enrichment of drug signatures in differentially expressed genes between young and old donors.
	Blood_Activated CD8+ T cell	Blood_Blood derived monocyte cell	Blood_Gamma delta T cell	Blood_Granulocytes cell	Blood_Plasmacytoid dendritic cell	Blood_T-cell 2 cell	Blood_mDC type 2 cell	Blood_megakaryocytes cell	Blood_naive B cell	Blood_naive CD4+ T cell	Brain_Astrocytes cell	Brain_Endothelial cell	Brain_Excitatory neurons cell	Brain_Inhibitory neurons cell	Brain_OPCs cell	Brain_Oligodendrocytes cell	Intestine_B cell	Intestine_Epithelial cell	Intestine_Glial cell	Intestine_Goblet cell	Intestine_Monocytes cell	Intestine_Paneth cell	Intestine_Pericytes cell	Intestine_Plasma cell	Intestine_T cell	Pancreas_Acinar-i cell	Pancreas_Acinar-s cell	Pancreas_Activated Stellate cell	Pancreas_Alpha cell	Pancreas_Beta cell	Pancreas_Delta cell	Pancreas_Ductal cell	Pancreas_Endothelial cell	Pancreas_Macrophages cell	Skin_Basal cell	Skin_Endothelial cell	Skin_Fibroblast cell	Skin_Granular cell	Skin_Immune cell	Skin_Melanocyte cell	Skin_Mitotic cell	Skin_Orbicularis oculi muscle cell	Skin_Pericyte cell	Skin_Spinous cell	Skin_Vellus hair follicle cell
Epithelial Cell;phloretin;trt_cp;200 uM;6 h	1.32708	2.88349	1.1679	3.19012	0.936052	1.02088	0.249522	0.516357	0.978067	0.470671	-0.350875	-0.240322	-0.24869	-0.0956732	0.106237	-0.713216	2.39986	0.683573	2.95123	0.478563	0.487271	2.51698	-0.356457	0.740387	0.204583	-0.11323	-0.548478	-0.0593014	-0.217123	-0.28616	0.239865	-0.67179	-1.02714	3.15386	-0.376398	0.0393223	-0.339141	-0.864344	2.2308	-2.86449	-0.0879667	-3.20043	-0.502645	-2.84333	-3.04913
Epithelial Cell;BRD-K26510616;trt_cp;0.3 uM;6 h	-0.0324613	-0.560292	-2.83511	2.49514	-2.36712	-0.109016	-0.0286247	1.80096	-0.13309	-0.381451	-0.383314	-2.35029	-0.730092	-3.24278	0.00506815	2.25105	-0.978871	-0.815664	-1.08182	0.052295	-0.801368	-3.43894	0.539038	-3.8636	-3.16086	0.506244	1.14871	1.59716	2.69328	2.92009	1.89605	-0.251019	-2.50628	-0.93944	-2.52999	-3.13905	-3.46252	2.14628	3.10812	-0.222542	-3.01108	3.19158	-3.02065	-1.90443	0.120388
Epithelial Cell;BRD-K64024097;trt_cp;1.25 uM;6 h	-2.86697	-2.85772	-3.20856	-0.129419	-3.18249	-2.54868	-2.44048	0.162685	-2.28701	-0.918289	0.0852787	0.100885	-0.271022	-2.84389	0.0577393	2.54779	-1.04895	-0.46774	-3.69789	-0.528022	-0.733197	-3.67468	0.0649895	-3.71592	-0.500229	0.305538	0.668663	3.03683	2.37926	2.68832	-0.31243	-0.169816	-0.552097	-1.66585	0.0272705	-3.29374	-3.35679	2.61125	0.832418	0.108254	-0.15245	2.7512	-2.83528	0.447027	0.600632
Epithelial Cell;BRD-A94451536;trt_cp;40 uM;6 h	0.978227	0.429634	0.746396	-0.147896	0.250513	0.530669	-0.336368	-0.196606	0.608704	0.182879	-0.270471	-2.74888	-0.70044	-0.280935	-0.0177337	-0.609974	2.87479	0.648728	2.56247	2.15232	3.28394	2.78879	-0.381595	2.5938	-0.268091	0.0895752	-0.209218	0.0946612	-0.0927769	-0.495771	0.413264	-1.19063	-3.33111	3.66651	-0.248853	0.55317	0.228094	-0.0342354	-0.187846	-2.17748	2.05961	-0.284071	-2.33796	-2.4137	-2.96279
Epithelial Cell;panobinostat;trt_cp;0.02 uM;6 h	-3.078	-3.02515	-3.42663	0.0590107	-3.19387	-2.93304	-2.9269	-0.179783	-0.579695	-3.15936	-0.503952	2.49201	-0.946216	-1.04791	-0.368816	-0.107766	-1.31671	-0.799753	-3.47022	-0.597838	-3.70745	-3.99458	-0.445153	-3.40856	-0.328859	0.848932	2.16558	3.35285	2.23842	2.65735	-0.381265	0.696679	-0.244563	-2.82161	0.0213166	-3.19657	-2.87964	0.427608	3.30963	0.120234	-0.349365	3.31475	-2.82238	0.122925	0.641309
Neural Progenitor Cell;BRD-K73261812;trt_cp;1.67 uM;6 h	-2.69229	-2.49314	-2.4895	-0.219004	-3.17637	-0.599982	-0.799338	2.27617	-2.70689	-0.237477	0.773835	0.756741	0.0464243	0.0186909	0.634636	3.05036	-3.22271	-0.309337	-2.32692	-0.297145	-0.429233	-2.13747	-0.679267	0.0387158	0.114698	0.664322	0.0677421	-0.228913	0.0853433	0.29834	0.0443458	0.868131	2.8732	-3.78526	0.391128	-0.160259	2.7456	-0.906764	-3.24091	2.73214	-0.23837	0.29053	3.32061	-0.369036	0.7977
Neural Progenitor Cell;ruxolitinib;trt_cp;0.5 uM;6 h	-2.82248	-0.452475	-2.30859	-0.056075	-2.95927	-0.505555	-0.468121	2.44616	-2.70016	-2.56083	0.519184	0.881847	-0.118166	-0.14134	0.548066	0.59445	-3.78316	-0.53694	-3.20904	-0.889176	-0.657625	-2.86407	-0.455721	-2.80148	-0.278523	0.556187	0.4027	0.170451	0.312779	0.496566	0.13362	0.98826	3.48463	-3.63621	0.00408014	-0.602012	0.0277732	-2.93471	-2.86211	0.273297	-2.91391	-0.429509	0.794121	-0.402216	0.424588
Neural Progenitor Cell;pyrazolanthrone;trt_cp;25 uM;6 h	-2.89425	-0.658063	-2.76685	-0.235807	-1.27274	-0.779953	-0.796161	2.33193	-0.951837	-0.494169	0.697424	3.65314	-0.153603	-0.175109	0.821253	3.16856	-3.14042	-0.101142	-2.41747	-0.230649	-0.595711	-2.27112	-0.828506	-0.273067	0.505123	0.708969	0.0134536	-0.0866251	0.555568	0.7572	-0.125176	0.592074	0.826858	-4.09518	0.0736889	-0.260403	0.275962	-2.74725	-0.989718	2.6909	-2.79538	-0.315672	2.88521	-3.09061	0.842542
Neural Progenitor Cell;dasatinib;trt_cp;0.12 uM;24 h	-0.133906	2.42741	1.7476	2.16297	2.06013	-2.04997	2.25312	-0.686797	1.8536	1.68926	0.376634	-0.0390059	-0.265234	-0.0267777	0.13565	-0.274292	2.50059	0.340094	0.33903	0.208441	1.21944	3.25136	2.86176	0.315361	-1.90952	-0.0533492	-0.277424	0.653169	-0.683637	2.77172	-0.632439	0.0305589	1.2501	0.202611	-0.0366165	-0.14309	-0.354739	2.38189	-0.180996	0.0861905	-3.45192	-0.144575	-2.70419	-2.81798	-2.23332
Neural Progenitor Cell;JWE-035;trt_cp;0.12 uM;24 h	-2.29926	-0.27671	-2.00917	0.118411	-2.64729	-2.63135	-0.449815	-0.287241	-2.47973	-2.03859	2.80436	0.696025	0.193206	0.143238	2.71627	2.17558	-2.05441	0.203089	0.056075	2.20575	0.573393	2.7865	0.0199893	2.32288	0.382586	0.0701464	-0.167351	0.432022	-0.310213	2.78411	-0.623859	0.129971	3.56185	-2.7968	0.297397	-0.371154	-0.513545	-2.8823	-0.623137	2.29766	-2.9701	-0.0288046	0.165537	-2.56736	2.62613
Neural Progenitor Cell;rigosertib;trt_cp;0.12 uM;24 h	1.99499	2.28498	1.91483	2.53111	0.248659	0.0627056	-0.0110471	2.2069	0.56965	2.06471	0.67998	0.131896	0.149072	0.16108	0.481192	0.26594	0.0398367	-0.379548	2.24532	0.280628	0.603874	0.357656	-0.345427	2.60995	0.202295	0.293046	-0.234116	0.423831	-0.363193	0.739817	-0.112389	0.112709	2.92951	-0.0650042	0.447708	0.506364	0.0602068	-0.573446	-0.399222	0.289666	0.447005	0.443342	1.04602	0.0357605	3.41367
Neural Progenitor Cell;GNF-2;trt_cp;0.12 uM;24 h	-1.85971	2.17625	0.392126	-0.249914	-0.345775	-0.0757687	-0.221867	-0.293094	-0.201553	0.368056	2.62559	0.214018	-0.125334	2.31527	2.51489	-0.502543	2.48942	0.291763	2.42334	2.51067	0.980707	3.23552	-0.0677663	2.62357	-1.92496	-0.194588	-0.411507	0.444384	-0.627998	2.60713	-0.545589	0.0898501	2.67917	0.140842	-1.98294	0.227139	-0.232052	-2.4754	-0.344119	2.35161	-3.12053	-0.0656038	-2.35064	-2.85329	2.31907
Neural Progenitor Cell;ACY-1215;trt_cp;0.12 uM;24 h	2.14039	2.80145	2.52516	2.70178	0.961939	0.242113	2.38885	-0.232434	0.774237	2.69564	2.56692	-0.256375	-0.180177	0.0805517	-0.0366051	-2.12029	0.435091	0.185512	2.65446	2.54254	3.54244	3.46703	0.676734	2.7284	-0.408788	-0.280549	-2.17488	0.716554	-0.619096	2.58447	-0.599267	0.274721	2.88577	0.524439	2.36011	0.225725	-0.268593	-2.2618	-0.0920334	2.37439	-2.89927	2.01256	-2.42408	-2.34005	2.28406
Neural Progenitor Cell;PD-0325901;trt_cp;0.12 uM;24 h	0.0233563	2.18595	0.125048	-0.0980834	-0.493723	-0.231028	-1.95938	-0.610222	-0.281815	0.03423	2.41753	0.242978	-0.164962	0.196323	-0.118268	0.158161	-0.158622	-0.17319	-2.27193	-2.04568	0.633148	2.77925	-0.0866676	0.771643	-0.0544733	-0.392718	-0.560772	0.566846	-0.609092	0.843581	-0.324349	0.117777	2.89108	-0.38126	-0.0171512	-0.344833	-0.449017	-0.199763	-0.449802	2.24913	-2.91812	-0.103541	-2.37406	-0.333174	2.82155
Neural Progenitor Cell;I-BET-151;trt_cp;0.12 uM;24 h	-1.07569	-0.367174	-2.29417	-1.06624	-2.60742	-0.977301	-0.559671	-0.552559	-2.99043	-0.768039	3.04712	0.237375	-0.199007	-0.173518	2.22788	0.0412786	2.15071	2.91782	0.279108	2.30947	-0.0260189	2.94349	-0.438485	-0.238391	0.151421	-0.0182138	-0.0967075	-0.474583	-0.52492	2.94584	-0.222946	-0.167158	2.88509	-2.54132	-0.374294	0.0261031	0.14843	-2.18229	-0.691714	2.51806	-3.7792	2.15871	-2.53483	-2.93659	-0.177918
Neural Progenitor Cell;rucaparib;trt_cp;0.12 uM;24 h	-2.35901	-0.045229	-0.264787	-0.240244	-2.48161	-2.46374	-2.11904	-2.6658	-0.455278	-0.0835891	0.0508371	-0.0236576	-0.243097	-0.171283	0.0423632	0.328933	-0.00382568	-0.309226	0.039084	-0.174469	0.849011	0.500063	0.648285	0.548929	-2.34203	-0.17381	-0.333947	1.11484	-0.407283	2.36792	-0.670293	0.509019	3.03749	-0.792388	0.778557	0.339684	-0.00242066	0.53957	-0.246403	2.38093	-0.286827	2.40996	0.187507	0.63147	0.708935
Neural Progenitor Cell;GSK-1059615;trt_cp;0.12 uM;24 h	-0.529816	2.42785	0.468515	2.0585	0.403339	-2.11772	2.23312	-0.924016	1.67457	1.6223	0.500202	0.176816	-0.255228	-0.0542901	0.249711	-0.0397772	0.241788	0.201808	0.329174	2.33269	0.8495	2.95609	0.833024	0.198111	-1.83496	-0.100639	-0.0483843	0.785891	-0.631521	2.66405	-0.484021	0.284717	1.16764	0.0299886	2.18613	-0.0609687	-0.426719	2.41068	-0.357084	2.35911	-3.38653	0.309336	-2.7021	-2.80316	0.401226
Neural Progenitor Cell;UNC-669;trt_cp;0.12 uM;24 h	-1.00352	0.0122773	-0.570065	-0.588645	-2.61543	-0.541331	-0.676201	-0.358561	-2.23596	-0.441761	2.92204	0.407443	0.228791	2.4935	2.72559	0.261065	2.1364	0.318516	0.202835	0.245446	3.0108	3.22204	0.41475	2.66293	0.108438	-0.166686	-2.45112	0.335875	-0.55455	2.427	-0.336226	-0.279217	3.1364	-0.32738	-0.0591975	-0.362214	-0.436549	-2.49467	-2.58856	0.324326	-3.07932	-1.88206	-0.154694	-2.95171	0.0362794
Neural Progenitor Cell;JW-55;trt_cp;0.12 uM;24 h	-2.07232	0.322816	0.00177692	-0.08158	-0.174104	-2.33452	0.254837	-2.26193	-0.521228	0.327927	0.438712	-0.00855379	-0.102757	0.11422	2.41376	-0.542661	0.268032	0.331788	2.41627	2.42288	0.828357	3.22068	0.412429	0.581179	0.354242	-0.0595036	-0.288542	0.410123	-0.572491	2.48023	-0.367632	0.149392	2.71594	-0.0799105	1.97646	0.171513	-0.243063	-0.082346	-0.185678	0.220271	-3.27506	0.241979	-2.4382	-2.51143	-0.390957
Embryonic Stem Cell;OSI-930;trt_cp;0.12 uM;24 h	0.110013	0.329446	0.187831	0.195743	0.559452	0.0522781	0.110534	2.42846	0.458009	0.247528	0.0187467	-0.945171	-3.59347	-3.22642	-0.0164921	-2.7719	-0.0864284	-2.48043	-0.0941723	-0.55541	-0.253593	0.0616084	-3.19602	-2.92448	-2.40452	-0.0137314	0.412367	-0.167884	-2.3375	0.623455	-2.0792	0.823008	-2.3977	0.0365732	-2.35058	2.86507	2.90675	-3.07444	0.698097	0.0118947	-3.91457	0.791185	-2.48426	-2.99779	-0.00822583
Neural Progenitor Cell;GDC-0068;trt_cp;0.12 uM;24 h	2.20481	2.38632	0.681517	-0.0995829	0.348047	-0.0242682	0.641371	-2.08808	0.646853	0.370941	2.39385	0.113878	-0.18191	-2.2356	0.229432	-1.82504	0.279841	0.0918647	1.99193	0.387165	1.01048	2.89537	0.455089	0.401727	-2.04425	-0.621357	-0.468573	0.773115	-0.552993	2.83142	-0.374278	0.166491	0.393261	-0.00255011	-2.14819	-0.400439	-0.390991	0.0706954	-0.547203	2.28752	-3.86737	-0.312086	-2.85889	-2.90764	0.102825
Neural Progenitor Cell;BIX-01294;trt_cp;0.12 uM;24 h	-0.480719	2.24489	1.85502	0.0783204	0.452174	-2.11926	-0.206214	-0.555835	-1.99282	1.73895	0.126484	-0.197209	2.3755	2.4139	2.09741	-0.287695	2.59315	0.627683	2.69717	2.6087	3.52069	3.66425	0.674225	2.60018	0.0752799	0.0597593	-2.18113	0.245178	-0.782916	2.68816	-0.835989	0.210441	3.37167	0.266112	2.19704	0.413426	-0.153011	-2.11296	-0.0270641	2.27286	-2.91673	-0.23728	-1.96699	-2.36378	2.21305
Neural Progenitor Cell;idelalisib;trt_cp;0.12 uM;24 h	-0.0211325	0.186227	-0.0327306	-0.124067	-0.189828	-0.245175	-0.0272508	-2.1024	-0.00967525	-0.0369568	0.334243	0.275399	-0.268015	-0.514941	0.0712532	0.200322	-0.442453	-0.406648	-2.49462	-0.299821	0.451295	-0.0254128	0.114225	0.358184	-2.02345	-0.408386	-0.222473	0.85601	-0.695923	1.20805	-0.515978	0.460144	0.654675	-0.556504	0.411953	-0.319552	-0.292679	-0.0736195	-0.283778	2.52747	-0.983883	-0.00808732	-0.106233	-0.190905	0.960171
Neural Progenitor Cell;SB-239063;trt_cp;0.12 uM;24 h	-2.0501	2.26762	0.0541966	-0.166547	-2.55395	-2.24913	-0.295319	-0.731714	-2.041	0.167984	2.78754	0.185197	0.0629167	0.23572	2.72443	0.162325	2.45414	0.0889565	0.212799	2.44343	0.767752	3.37346	0.0113311	2.85927	0.310984	0.0569847	-0.618286	0.142667	-0.370119	2.54436	-0.258924	0.0185984	2.88685	-0.341522	2.09596	-0.24038	-0.47917	-2.46161	-0.0999537	-0.0603231	-2.85248	0.0681951	1.99075	-2.65162	-0.11306
Neural Progenitor Cell;LY-2603618;trt_cp;0.12 uM;24 h	-0.748221	0.0521368	-1.70265	-2.40904	-2.529	-2.09908	-0.331892	-0.495122	-2.15454	0.0338361	2.73163	0.213136	0.31747	0.473375	2.76776	2.09031	2.20564	0.121986	0.554709	2.50235	1.21489	3.49978	0.518614	3.04794	1.80845	0.238408	-2.48138	0.595313	-0.559378	2.52221	-0.120775	-0.0313104	3.26138	0.0100263	0.330826	-0.324305	-0.486455	-2.61218	-0.383946	1.90301	-2.67728	0.422761	0.0581856	-2.24934	2.74071
Neural Progenitor Cell;MC1568;trt_cp;0.12 uM;24 h	0.172504	2.5186	2.01859	1.99961	0.604918	-2.00224	-0.0881812	-0.554509	1.49411	2.50221	0.0742614	-0.413483	-0.182132	0.523786	2.24845	-0.736178	2.94424	3.17544	2.95714	2.62369	3.82169	3.71261	2.92367	2.76005	0.0953817	0.537	-2.05469	0.437452	-1.11943	0.117491	-0.262485	0.229343	3.00657	0.582774	2.23583	0.61675	2.57702	-1.97161	-0.0698708	2.65331	-2.56344	0.326752	-0.296637	-2.1343	-0.234362
Neural Progenitor Cell;BRD-K68336408;trt_cp;0.12 uM;24 h	2.38408	2.51974	0.991115	0.357081	2.42605	0.15303	2.42076	-1.93365	1.00402	0.909532	-0.0512944	0.875382	-0.46885	-2.58475	0.0235673	-0.411496	0.0731996	-0.346536	-0.0475677	0.316825	0.736373	0.230114	0.223217	0.237996	-0.131546	-0.473584	-0.281299	1.19695	-0.678501	3.19413	-0.870319	-0.054552	0.49466	0.00733372	-0.438521	-0.240815	-0.620113	0.151816	0.0577485	2.50663	-3.52124	-0.266931	-2.59549	-0.226312	0.813304
Neural Progenitor Cell;KI-20227;trt_cp;0.12 uM;24 h	2.30967	2.08149	2.30741	0.476363	0.789297	0.415134	1.919	-0.195596	0.345303	2.16731	2.87948	0.560353	0.334824	0.589844	2.74186	2.0336	0.388603	0.29974	2.49205	2.38674	3.35347	2.7995	3.3425	0.743304	-0.315633	0.23885	-0.110857	0.947115	-0.542624	2.61112	-0.407684	-0.437567	3.12048	0.336855	0.502179	0.239574	-0.26779	-2.38739	-0.453688	2.24786	-0.200575	2.14222	-0.259705	-2.0697	2.57456
Neural Progenitor Cell;ischemin;trt_cp;0.12 uM;24 h	-2.41992	0.0971591	-0.0379544	-2.49937	-2.38117	-2.42887	-0.435994	-0.930663	-2.26315	-0.00896526	2.51688	0.091239	-0.0577121	-0.100352	0.324458	0.0307119	0.0803678	0.0412085	0.0760334	2.08682	0.851915	3.00235	0.291073	0.63161	0.348582	-0.208953	-0.400258	0.427346	-0.576697	2.38581	-0.419271	0.364717	3.07351	-0.310397	2.26458	0.199063	-0.361016	0.155912	-0.21573	0.191101	-2.83188	0.431969	-2.13873	0.0387983	2.3661
Neural Progenitor Cell;vandetanib;trt_cp;0.12 uM;24 h	0.214984	0.324957	0.202405	0.135245	0.240065	0.243161	0.0370253	-1.8214	0.386588	0.371696	0.226762	0.440519	-0.27538	-0.41279	0.137954	0.348817	-0.0605991	-0.651678	-0.25258	0.0249416	0.807085	0.0519506	0.49183	2.49382	-0.632936	-0.402161	-0.328318	1.02805	-0.394261	0.644861	-0.655009	0.357194	0.587023	-0.0014698	0.434947	-0.120043	-0.428531	-0.308318	-0.699891	0.177287	-0.691008	0.160313	0.136468	-0.102258	0.561979
Neural Progenitor Cell;MK-1775;trt_cp;0.12 uM;24 h	-1.99857	-0.188119	-0.448321	-0.188456	-0.295241	-0.262701	-0.0956281	0.28367	-0.0656653	-0.00601687	0.150603	0.360308	0.0510908	-0.26585	0.284753	0.411662	-0.316714	-0.262567	0.480869	2.44646	0.936958	0.356181	-0.198576	0.456019	-0.314327	0.34601	0.0348612	0.957176	-0.4707	1.02053	-0.254273	0.254413	1.4203	0.136796	0.450166	0.276616	0.141917	-0.483981	-0.111622	0.530036	0.00406476	1.11306	0.919582	0.19407	1.19695
Neural Progenitor Cell;dabrafenib;trt_cp;0.12 uM;24 h	-0.647551	0.493749	0.457272	-0.23327	-0.224381	0.213772	-0.590361	-0.076047	-0.245322	0.646345	2.4151	0.0306748	0.263795	2.30635	2.42739	-2.32604	2.62613	0.625169	2.78284	2.92666	3.4145	3.02848	0.128451	2.86214	-1.57969	-0.0555144	-2.42955	0.00942109	-0.72196	0.247478	-0.548982	-0.231314	2.88658	0.915691	0.139142	0.769491	0.39199	-2.82933	-0.313294	2.62395	-2.9719	2.26765	2.32247	-2.38723	0.0838978
Neural Progenitor Cell;saracatinib;trt_cp;0.12 uM;24 h	-2.27687	-0.102452	-0.0402381	-2.62055	-2.93535	-0.0493247	-2.2943	-0.843138	-2.37172	0.214297	0.771437	0.361336	-0.183988	0.340044	2.60408	0.21103	1.97645	-0.0323616	-0.240541	0.127454	2.82314	3.00952	0.402771	2.76389	-1.75341	0.160812	-2.49358	0.143353	-0.796144	0.253955	-0.107185	0.1135	0.813983	0.16686	2.28336	-0.0166484	-0.2899	-2.63639	-2.77091	0.169248	-2.92617	2.28674	-0.0563128	-2.85001	-0.404991
Neural Progenitor Cell;CX-5461;trt_cp;0.12 uM;24 h	1.83275	2.16287	2.12091	2.17898	0.134793	-0.120282	-0.119029	-0.512616	0.337164	0.752323	2.60345	-0.237859	2.77385	2.85754	2.92998	0.0936451	2.94201	0.32365	3.03678	2.80665	3.63812	3.63406	0.23176	3.24583	-0.597731	0.544959	-2.14455	0.153268	-0.80369	-0.0333969	-0.346671	0.483689	2.59314	0.545375	0.347102	0.564958	0.193365	-2.68093	-0.109076	2.25334	-2.67748	-0.269723	2.39144	-2.7726	2.79432
Neural Progenitor Cell;KIN001-269;trt_cp;0.12 uM;24 h	-0.481359	2.04333	0.404746	-2.18483	-0.457834	-2.00128	-0.46272	-0.856181	-1.96023	1.70951	0.538406	0.0419625	0.0798494	2.43478	2.39281	-0.357435	2.64458	0.573515	2.16782	0.202924	3.13596	3.18189	2.37965	0.908732	0.0656481	-0.04477	-2.15685	0.568363	-0.712407	2.43442	-0.529544	-0.161136	2.89041	0.282518	-0.03126	0.330584	-0.0223266	-0.0782569	-0.244158	0.285742	-2.95071	0.188881	-2.30901	-2.49274	-0.208405
Neural Progenitor Cell;RG-108;trt_cp;0.12 uM;24 h	0.0871724	0.385242	0.2737	0.135943	0.10134	-2.30747	0.327591	-0.747453	-0.133441	0.119754	0.071105	0.145281	-0.224173	-0.171194	-0.109628	-0.259618	-0.160359	0.0489501	0.338629	-0.193692	1.09242	0.64527	0.623109	0.472118	-1.7323	-0.0755814	0.0601278	1.34083	-0.62089	3.02292	-0.909426	0.444491	3.7613	-0.172102	0.79544	0.00555791	-0.468012	0.192893	0.283486	0.762562	-2.47298	0.624055	-0.401409	0.421214	2.6553
Embryonic Stem Cell;SB-216763;trt_cp;0.12 uM;24 h	0.0835508	0.445608	0.144739	0.142513	0.714315	0.148108	0.0548615	0.202799	0.53429	0.312831	0.161251	-3.52858	-3.61863	-3.19439	-0.0835564	-2.71385	0.000344759	-2.52757	-0.0281654	-0.433106	-0.192279	0.188351	-3.24092	-2.62023	-2.24658	-0.0550113	0.431629	2.5128	-0.283194	3.20423	-0.172542	0.61296	-2.75003	-0.215097	-2.51752	3.08684	3.24539	-0.433471	2.72075	0.122308	-4.09725	0.993629	-2.59893	-2.87426	0.144738
Embryonic Stem Cell;PHA-767491;trt_cp;0.12 uM;24 h	0.383722	0.764403	0.579191	2.50495	2.86815	0.315358	0.263302	0.262911	0.73775	0.507973	0.267709	-3.21712	-3.34381	-2.91276	2.47279	-2.75826	0.0605257	0.0361327	-2.35244	-0.520639	-0.0342619	0.244974	-3.21389	-2.63891	-0.159496	-0.222972	0.166225	-0.225886	-0.412208	0.440275	0.0210815	0.747295	-2.86772	-0.136349	-2.60516	0.39861	2.81463	-2.58503	2.61195	-0.106115	-4.23804	0.60809	-3.06511	-3.02068	-0.191274
Neural Progenitor Cell;A-66;trt_cp;0.12 uM;24 h	2.75536	0.844862	0.834068	0.195401	1.1753	0.393324	0.681659	-0.27291	0.968795	0.830046	0.152898	-0.0965989	-0.41192	-2.63553	-0.00341825	-0.0862614	0.274627	-0.0928646	0.577579	0.433639	1.09314	0.693754	0.607146	0.621739	0.00624031	-0.405213	-0.323772	1.2047	-0.535213	3.05463	-0.661482	0.305489	0.624054	0.409907	0.171809	0.144922	-0.0601909	0.0469592	0.166502	0.912837	-0.946653	0.16483	-0.447135	-0.153615	0.395053
Neural Progenitor Cell;Y-27632;trt_cp;0.12 uM;24 h	-0.739262	0.03534	-0.604455	-0.424741	-2.64262	-2.4027	-0.707014	-0.466238	-2.63447	-0.674303	2.89888	0.245448	0.1879	0.43273	2.48877	0.221724	2.3994	0.381333	0.293176	0.279021	2.94608	3.52262	-0.0989906	2.74723	-0.000738595	0.162484	-2.63213	-0.340832	-0.437756	2.53743	-0.451389	-0.08479	2.99221	-0.436046	0.0492654	-0.244408	-2.90264	-2.53878	-0.562733	0.277767	-3.13017	-2.18326	-2.25011	-2.88099	-0.0278892
Neural Progenitor Cell;vorinostat;trt_cp;0.12 uM;24 h	-0.0811593	2.49287	2.08388	0.0948891	-1.93669	-0.297676	-0.137006	-0.40492	-0.205308	2.1893	0.533425	-0.290589	0.246003	2.76347	2.64406	-2.31573	2.60143	3.01515	-0.0806321	0.294084	3.035	3.24048	-2.24895	2.95619	0.390561	-0.500779	-2.73836	-2.39696	-0.603183	2.33926	-0.595958	-0.105471	2.76901	0.0233253	0.17242	0.0240916	-0.129262	-0.554019	-0.104241	-0.043621	-3.25912	-2.20542	-0.410848	-2.78047	0.023988
Neural Progenitor Cell;sunitinib;trt_cp;0.12 uM;24 h	2.17511	2.41015	2.41441	0.110165	2.00423	0.350439	2.26149	-0.216923	0.168023	0.499652	2.31297	0.620712	0.161331	2.22059	0.390277	-0.204589	2.53867	-0.0301256	0.0454985	2.63633	1.47084	3.03385	0.363585	3.11845	1.99303	-0.495312	-0.557927	0.928265	-0.646783	2.21005	-0.765717	0.135484	0.732451	0.357296	0.0984646	-0.300736	-0.397571	-2.75849	-0.948256	2.71205	-3.6856	-2.7324	0.15696	-3.01514	0.148192
Neural Progenitor Cell;TPCA-1;trt_cp;0.12 uM;24 h	2.86247	2.74626	2.71861	0.713445	3.38981	0.548398	2.63454	-2.05884	2.71727	1.2841	0.110461	0.167068	0.291702	-2.26527	0.276673	-0.00798573	0.720469	-0.133987	0.64103	2.45286	1.6614	0.505191	1.19834	0.851102	0.266106	-0.460035	-0.735656	1.31069	-0.623137	2.62175	-2.65769	-0.287201	0.716048	0.623999	0.376172	0.324965	-0.332969	0.496883	0.341453	2.52733	-0.585347	-0.0508232	-0.304614	-0.0962854	0.174101
Neural Progenitor Cell;NPK76-II-72-1;trt_cp;0.12 uM;24 h	-0.173762	0.11767	-0.0184065	-0.179774	-0.152342	-0.19566	0.189497	-0.643671	-0.264393	0.123318	2.5761	0.217337	-0.282225	-0.000574182	0.194741	-0.150231	-0.00398338	-0.0829689	0.176328	-0.0640682	0.764355	2.82736	0.551955	0.64536	-0.303767	-0.144046	-0.257435	1.09376	-0.552002	0.778006	-0.445957	0.438463	2.77381	0.112863	2.45864	0.0986677	-0.3357	-0.0154867	-0.194401	2.41344	-2.63884	0.570227	-2.42686	-0.142351	2.48389
Neural Progenitor Cell;KIN001-242;trt_cp;0.12 uM;24 h	-0.357919	2.37395	1.80377	-0.014815	0.179238	-2.08686	-0.187096	-0.544075	0.130647	1.87336	0.673475	0.089284	0.340179	2.64933	2.57186	-0.0387295	2.60387	0.474705	2.8934	2.7987	3.50603	3.57358	2.74605	3.06658	0.330914	-0.277374	-2.44977	0.190926	-0.472366	2.46326	-0.194221	-0.0906552	2.92276	0.0940768	2.06588	0.0545939	-0.32195	-2.26156	-0.111832	2.50143	-2.79682	-2.02012	-0.0631854	-2.68475	-0.372911
Neural Progenitor Cell;JNK-IN-5A;trt_cp;0.12 uM;24 h	-0.102166	0.26491	-0.380021	0.250589	-0.16717	-2.37264	-0.0815456	1.85436	0.19611	-0.0880178	-0.00294075	-0.00175616	-0.0480042	-0.340976	0.115381	-0.390178	-0.343039	-0.316746	0.24016	0.0444524	0.771846	0.0701587	0.127064	0.676441	-0.12412	0.364518	0.443973	1.10358	-0.466232	0.866887	-0.602013	0.698102	2.94889	-0.262535	0.826895	0.7673	0.347414	-0.213101	0.00159111	0.364288	0.705872	0.959785	0.774456	0.516543	3.29809
Neural Progenitor Cell;NVP-BHG712;trt_cp;0.12 uM;24 h	0.183732	2.38532	0.203263	0.242449	-2.17038	-0.0669461	2.21955	-0.652886	0.0515865	2.05201	-0.365968	0.183925	-0.17409	0.0181534	0.0751045	0.182019	-2.47358	-0.322095	2.31991	2.12343	0.942212	2.87508	0.67731	0.415627	0.0453982	-1.92303	-0.204889	0.91053	-0.671634	0.523417	-0.307602	0.449307	3.47585	-0.260391	3.24499	0.51304	-0.107013	0.468219	-0.196666	1.04401	0.739169	0.672523	0.153766	0.948543	2.79156
Neural Progenitor Cell;BRD-K55591206;trt_cp;0.12 uM;24 h	-0.136682	2.43539	2.20521	-0.279631	0.46986	-1.87865	-0.469412	-0.365259	0.228048	1.91918	2.8174	0.0736523	0.444132	2.65701	2.34698	-0.0974084	2.57354	0.679054	2.97203	2.65653	3.53312	3.75027	0.262963	2.90488	0.257	0.0111284	-2.41428	-0.222957	-0.617723	2.36952	-0.209593	-0.0990284	3.09959	0.352064	2.04572	0.326738	-0.0580634	-2.35365	-0.124447	2.46409	-2.76176	-0.322306	-0.123016	-2.53397	0.118531
Neural Progenitor Cell;CC-401;trt_cp;0.12 uM;24 h	1.64915	2.25274	0.503823	0.239633	0.426732	-0.0305633	1.86835	-2.51534	0.179681	2.21948	2.2338	0.803158	0.530232	2.58517	2.84082	-0.0833235	-0.00264194	0.00926897	2.53067	2.13018	1.44282	3.01142	1.04723	0.721039	1.9976	-0.389391	-0.431414	0.982414	-0.85227	2.25549	-0.603956	-0.0283393	3.59287	-0.135714	3.08532	0.589277	0.130256	2.51846	-0.107459	2.77256	0.185918	1.85428	0.146496	0.946669	2.78015
Neural Progenitor Cell;MGCD-265;trt_cp;0.12 uM;24 h	-0.708405	2.26769	1.59533	2.05586	-1.93858	-1.90758	-0.250632	-0.71585	-1.68912	1.72441	2.54969	0.635196	0.345439	0.625508	0.547843	0.209282	0.123835	-0.0560168	2.24403	2.50496	1.12408	2.90976	0.637701	2.4965	0.636339	-0.416876	-0.575038	0.726046	-0.38391	0.789643	-0.21266	0.0434568	3.13707	-0.310797	2.87673	0.0134217	-0.205774	2.45292	-0.297106	2.24685	-0.122751	0.0451052	0.0361299	0.665324	2.58696
Neural Progenitor Cell;resveratrol;trt_cp;0.12 uM;24 h	-2.18619	0.224587	-0.0180855	-0.138467	-0.324277	-2.46834	-0.427134	-0.723424	-2.30924	-0.190975	2.71637	-0.292069	-0.0994375	0.112833	0.048868	2.16518	0.163002	0.0872102	2.24473	0.152081	0.93827	3.27528	0.112263	2.6234	0.400005	-0.243598	-0.225531	0.273019	-0.431482	2.66871	-0.357557	0.430348	3.18488	-0.27151	0.418914	-0.119511	-0.491274	0.0605957	0.23725	2.2613	-2.69038	0.129714	0.116898	-2.24426	2.47176
Embryonic Stem Cell;tivantinib;trt_cp;0.12 uM;24 h	-0.0391088	0.311536	0.144659	0.169292	0.538512	-0.0637018	-0.0809214	0.287593	0.392633	0.105949	0.0898274	-3.30865	-3.63912	-3.23526	-0.0229122	-2.71281	0.115091	-2.57044	-2.55816	-0.696164	-0.180985	0.241714	-3.2627	-2.6207	-2.55588	-0.162804	0.168788	-0.0533278	-0.498628	0.413269	-2.04137	0.762632	-2.64819	-0.00623735	-2.32962	2.9404	3.04614	-2.66712	0.898869	-0.241679	-3.9059	1.02152	-2.80338	-2.71495	0.066486
Kidney Cell;XMD-892;trt_cp;0.12 uM;24 h	-0.401202	-0.352627	-0.161018	-0.346567	-0.966261	-0.321043	0.27823	2.43939	-0.855213	-0.632138	0.0357591	3.77523	0.36829	-0.00553604	0.311546	0.454572	-3.53827	-0.310844	-2.91083	-2.79274	-3.17245	-3.03508	-0.887663	-2.87985	2.55245	0.242834	0.337936	0.933237	0.0863401	0.380428	0.18023	0.65395	3.4429	-3.71767	0.519664	-0.120421	-0.583841	0.532931	-0.413781	3.13698	0.291421	-0.0615647	0.00760297	0.874456	3.24933
Neural Progenitor Cell;GSK-J2;trt_cp;0.12 uM;24 h	-1.81079	0.332826	0.438841	0.109016	-0.320577	-0.347026	0.113965	-2.13487	-0.10318	0.0955057	2.53274	0.230414	-0.216931	0.220555	0.210272	-2.10308	-0.0919909	0.143094	2.21288	-0.142159	1.06036	2.72639	0.586806	0.524769	-0.71773	0.0957928	-0.148691	1.03656	-0.591826	2.78599	-0.746772	0.205292	3.30675	-0.0470895	0.389116	-0.0863664	-0.585456	-0.0960707	-0.370392	-0.0577095	-2.74425	0.524995	-2.56777	0.103233	2.71183
Neural Progenitor Cell;GSK-2334470;trt_cp;0.12 uM;24 h	-0.660047	-0.0117747	0.286067	-0.23501	-2.55768	-2.31452	-0.292123	-0.426487	-2.47282	0.0305735	2.47168	0.635625	0.174081	0.491958	0.27255	2.12098	0.0148248	-0.0216235	-0.269202	2.12877	1.00832	3.12717	0.64273	0.60636	0.197693	0.0808171	-0.411138	0.346206	-0.212458	2.64845	-0.50665	0.273244	3.28766	-0.483552	2.55256	-0.45001	-0.467272	-2.18901	-0.329077	2.08472	-2.45111	0.291508	-0.15986	0.205194	2.39707
Neural Progenitor Cell;KIN001-244;trt_cp;0.12 uM;24 h	2.53454	2.71648	2.44534	0.322884	2.37315	0.492231	2.50969	-2.08944	2.5649	0.770171	2.07862	0.908916	0.205952	2.04638	0.178132	-0.0536457	0.286267	-0.415269	2.9449	3.11635	0.975323	2.81548	0.769127	2.87702	-0.046441	-0.39066	-0.429464	1.01526	-0.616841	2.69326	-0.666699	0.0497333	0.541826	0.230413	0.364617	-0.112092	-0.40519	0.201166	-0.453572	2.69812	-3.06833	-0.462297	-0.229334	-0.355739	0.13912
Neural Progenitor Cell;AST-1306;trt_cp;0.12 uM;24 h	1.97693	2.26936	0.557383	0.0491971	0.321644	0.148064	0.49833	-2.01351	0.553999	0.525852	-0.144025	0.186872	-0.144633	-2.3118	0.0637963	-0.0469616	0.265525	-0.130279	0.297124	0.306341	0.67924	2.84753	0.726186	0.646752	-2.20711	-0.53555	-0.462337	0.998023	-0.472005	2.72478	-0.499691	0.131651	0.10612	-0.234169	-2.25945	-0.315159	-0.438165	0.303763	-0.303639	2.41776	-3.97974	-0.0641336	-2.69064	-2.92115	-2.28327
Neural Progenitor Cell;CG-930;trt_cp;0.12 uM;24 h	-2.56802	0.0497909	-0.0812915	-0.148851	-0.661549	-2.58919	-2.44116	-0.647786	-2.61099	-0.228223	2.28576	-0.375874	-0.0934051	0.0469777	-0.0619455	1.94877	0.0577791	0.0889426	2.12172	-0.0783145	0.815013	3.16334	0.22662	0.64873	-0.257732	0.180282	-0.0108904	0.315307	-0.407255	2.64387	-0.441996	0.703355	3.44227	-0.11091	0.0638155	-0.349918	-0.53578	-2.61725	-0.297779	-0.155307	-3.186	2.26107	-2.00876	-2.41171	2.52112
Neural Progenitor Cell;doramapimod;trt_cp;0.12 uM;24 h	0.17002	0.172262	0.0586781	-0.116557	-1.82832	0.146902	0.238427	-2.13903	0.228223	-0.0512333	0.317581	0.755193	-0.36754	-0.656439	0.255729	0.420562	-0.318989	-0.660474	-2.48011	-0.183175	0.537799	-0.0132551	0.312737	0.0987406	0.0263461	-0.420705	-0.35624	1.14211	-0.659474	2.68455	-0.703296	0.152889	0.473044	-2.66388	0.382444	-0.168784	-0.302345	0.251698	-0.334326	2.66901	-3.40985	-0.326626	-0.00321103	-0.227537	0.500903
Neural Progenitor Cell;AT-7867;trt_cp;0.12 uM;24 h	2.42015	1.18802	1.22339	0.405421	1.22095	0.465285	0.795334	-2.20236	1.26581	1.10057	0.223154	0.162829	0.32204	0.216405	2.63517	0.0497064	0.930164	-0.0844563	2.55321	2.81873	1.32261	2.58177	0.580507	2.79315	0.0872446	-0.0752058	-0.169169	1.03666	-0.586837	2.82446	-0.435791	-0.00074209	0.62637	0.837033	-0.178272	0.240171	-0.355461	-0.0561408	-0.529298	2.54633	-0.905373	0.185496	-0.069968	-0.298853	0.409015
Neural Progenitor Cell;HMN-214;trt_cp;0.12 uM;24 h	-2.31399	-2.06251	-2.13893	-0.427601	-2.82339	-2.28516	-0.246692	0.127529	-2.16205	-2.07981	3.15048	0.254569	-0.0315034	-0.0574166	0.494102	2.2363	1.91354	-0.122642	-0.335201	2.35805	0.510417	2.46767	-0.530652	2.86135	0.38008	0.197905	-0.22391	0.218094	-0.473717	0.751354	-0.212894	0.181079	2.36742	-2.70996	0.239552	-0.37075	0.0835182	-2.88661	-2.59222	2.13649	-2.90534	0.0872863	0.654232	-2.99867	2.69919
Neural Progenitor Cell;KIN001-055;trt_cp;0.12 uM;24 h	-2.45628	-0.449263	-0.401966	-2.2117	-2.84268	-2.34483	-2.49309	-0.638943	-2.41876	-0.403911	0.546277	0.310596	-0.202225	-0.0270671	0.0886402	0.495994	-2.56869	-0.374105	-2.30769	-0.565078	0.312735	0.015401	0.187663	-0.0486671	-2.36891	0.302819	0.300855	0.594713	-0.0606923	0.856803	-0.301761	0.487427	3.34273	-3.1277	0.443966	-0.29948	-0.388439	-0.413622	-2.256	0.035734	-0.466108	0.714291	0.0137831	0.479105	2.83684
Neural Progenitor Cell;GSK-429286A;trt_cp;0.12 uM;24 h	-2.1401	-0.160365	0.172841	-2.5958	-2.62981	-0.193894	-0.644048	-0.458941	-2.29503	0.493239	2.43736	0.809453	2.79196	2.77171	2.99598	1.93463	2.12779	-0.373515	0.170427	0.663616	2.8818	2.7379	0.233894	2.88654	0.712837	-0.409469	-2.74185	0.152428	-0.630528	2.31636	-0.168011	-0.148907	2.96789	-0.314141	0.429249	-0.167442	-0.507244	-2.39938	-0.600564	0.344699	-2.46609	-2.11601	0.00071568	0.313973	2.79693
Neural Progenitor Cell;D-4476;trt_cp;0.12 uM;24 h	1.93345	2.37704	0.645187	2.58676	0.653416	-0.130434	2.15429	-1.80632	0.0470914	2.47939	2.27531	0.396832	0.456667	2.64697	0.510428	1.98409	0.23837	0.132159	2.72043	2.43295	3.41825	3.29308	0.926171	2.82459	0.271	-0.123276	-0.33988	0.600388	-0.585742	2.31546	-0.627371	0.363213	3.50893	0.117857	2.63546	0.274118	-0.253918	-0.0391474	-0.22854	2.36058	-0.0869286	1.83154	0.142256	0.136171	2.59858
Neural Progenitor Cell;JQ-1-R;trt_cp;0.12 uM;24 h	-2.01729	0.291832	0.131065	-0.0989665	-0.381388	-0.360682	-2.25861	-0.461522	-0.145101	0.341286	0.134905	-0.332232	-0.084973	-0.0734009	0.0823161	-0.305031	0.236795	0.175213	2.31573	2.4585	1.08034	3.26895	0.627813	0.802351	-1.78485	0.194649	0.0674481	0.7427	-0.597169	2.62784	-0.360228	0.601227	3.47626	0.252101	2.51338	0.325099	-0.229726	-2.51662	-0.146373	2.70959	-2.6475	2.97578	0.0927764	-2.34114	2.55297
Neural Progenitor Cell;PHA-767491;trt_cp;0.12 uM;24 h	-0.150432	0.125978	-0.0812886	-0.43629	0.12076	-0.209745	-0.542923	-2.17451	0.0218565	0.317284	-2.34431	-0.388355	-2.97958	-2.4295	-0.136261	-2.36706	0.42445	0.0629084	2.05068	-0.115018	0.900657	2.98306	0.0461382	0.784908	-2.53742	-0.355407	-0.12729	0.519162	-0.569291	2.84947	-0.443584	0.537237	2.24824	0.113142	-2.2203	-0.11373	-2.95736	-2.70477	0.0387507	0.143675	-3.65721	0.485022	-2.64949	-2.98286	-0.311985
Neural Progenitor Cell;TAK-715;trt_cp;0.12 uM;24 h	-2.41392	0.10959	-0.170056	-0.0728389	-0.445389	-2.46451	-2.3921	-0.665483	-0.636414	-0.185143	2.39274	-0.00518027	-0.11728	-0.0879092	0.0972921	-0.0118342	2.33509	0.0393236	2.3949	2.59488	0.949736	3.37246	0.606395	2.92498	0.248987	-0.103021	-2.24383	0.454123	-0.653245	2.37249	-0.421269	0.267682	3.06517	0.0399821	2.51424	0.0384785	-0.364609	-2.506	-0.295818	-0.00636836	-2.80421	2.06632	-0.208099	-2.35549	-0.413654
Embryonic Stem Cell;KIN001-266;trt_cp;0.12 uM;24 h	-0.098589	0.242821	0.0812917	0.26331	0.358488	-0.242382	-0.0467644	2.30254	0.347937	0.0468541	-0.049861	-3.50253	-3.53771	-3.43597	-0.112831	-2.69708	-0.117986	-0.489181	-0.238977	-0.637931	-0.244558	-0.0534603	-3.29888	-2.51781	-2.57057	-0.0878506	0.564938	0.113285	-2.44279	0.549623	-2.30362	0.94334	-2.75233	-0.323131	-0.203423	3.21595	3.15471	-3.042	2.5568	2.27863	-3.85133	0.93795	-2.02315	-2.7157	0.108246
Embryonic Stem Cell;amuvatinib;trt_cp;0.12 uM;24 h	-0.0905055	0.343679	0.0441795	0.154332	0.387177	-0.143929	0.0124455	0.184313	0.385984	-0.00533458	-0.111352	-3.46903	-3.71568	-3.24658	-0.15117	-2.66212	-0.402506	-2.55316	-0.208161	-0.613729	-0.35966	-0.0493604	-3.37063	-2.72441	-2.39169	0.0813278	0.668173	0.156057	-2.3674	0.648049	-2.36011	1.07515	-2.9204	-0.546719	0.0249691	3.3119	3.22564	-0.440889	2.54752	2.42995	-3.68564	1.09112	-2.59335	-2.41388	0.0840658
Embryonic Stem Cell;bosutinib;trt_cp;0.12 uM;24 h	0.0558043	0.312445	0.187396	0.291683	0.572563	0.0825347	0.0827451	0.219298	0.348758	0.158199	0.266039	-3.25845	-3.4702	-2.97492	2.55593	-2.7797	0.106946	0.0806705	-0.170529	-0.533456	-2.68298	0.116075	-3.13114	-2.7751	-0.259828	-0.129853	0.313478	-0.143564	-2.28932	0.370435	-0.120625	0.771741	-2.77503	-0.29498	-2.54848	3.01664	3.05716	-2.75124	2.45538	0.0415685	-4.13151	0.854301	-2.57802	-2.94603	-0.241513
Neural Progenitor Cell;pazopanib;trt_cp;0.12 uM;24 h	-0.346056	2.13348	0.305212	-2.31837	0.0186194	-0.193145	0.373458	-0.894567	0.241022	0.214365	2.37265	-0.0474982	-2.72757	-2.27072	0.0636709	-0.0989355	2.64771	0.0209543	2.10222	2.60163	0.954761	3.37401	0.941906	1.97388	-0.0128883	-0.246113	-0.28089	1.04224	-0.595083	2.7403	-0.449339	0.214298	0.0957643	-0.208327	-2.28566	-0.509821	-0.720751	-0.363029	-2.45576	0.0848067	-4.21941	-0.43185	-2.82443	-2.91684	-2.59537
Neural Progenitor Cell;JNJ-38877605;trt_cp;0.12 uM;24 h	-2.08022	0.170023	0.237017	-0.0724111	-0.759496	-2.44537	-0.551333	-0.563453	-2.38222	0.158055	0.521643	0.00936988	0.144302	2.69713	2.53975	0.0306703	2.46998	0.166197	0.384605	2.44011	3.3813	3.51442	2.68555	2.89884	0.0795704	0.193802	-2.40315	0.219256	-0.681638	-0.208532	-0.561771	0.320823	3.08364	-0.033761	2.82245	0.0151255	-0.405195	-2.66	-0.142876	2.14261	-0.378586	2.03802	0.0447988	-2.1512	-0.132014
Neural Progenitor Cell;HG-14-10-04;trt_cp;0.12 uM;24 h	2.25961	2.26905	2.26586	-0.066224	2.38974	0.0877331	2.35503	-0.685928	2.2536	0.377514	2.13315	0.00660468	-2.94955	-2.65861	-0.0887292	-1.85868	0.395538	-0.218505	0.228584	0.622593	0.676288	2.74258	1.01966	0.308299	-0.277949	-0.32277	-0.0462307	0.965557	-0.508357	2.72533	-0.366624	-0.0311374	0.239299	0.020819	-2.26579	-0.435905	-0.359917	0.262409	-0.409958	2.35577	-3.86422	-0.161281	-2.9109	-3.07179	-0.366471
Neural Progenitor Cell;serdemetan;trt_cp;0.12 uM;24 h	-0.527534	0.249726	0.257467	-2.25614	-0.644393	-1.99165	-0.479586	-0.654381	-2.23326	0.468627	2.77269	0.201278	0.390447	2.71803	2.79112	2.25868	2.31241	0.19467	0.393739	2.46503	3.37911	3.32495	0.722011	2.79178	-2.16845	0.247134	-2.5024	0.497359	-0.429069	0.719919	-0.281616	-0.0613258	2.98949	0.0583386	2.04185	-0.236469	-0.508925	-2.53964	-0.51205	-0.0664455	-2.59	2.10682	-2.11897	-2.29651	2.57582
Neural Progenitor Cell;daminozide;trt_cp;0.12 uM;24 h	-0.192175	2.27134	0.0499798	-0.181215	-2.0585	-0.185103	-0.221618	-0.196747	-1.6883	2.19332	2.99278	0.20863	0.0973208	2.63165	2.39516	0.0828469	2.55382	0.390943	0.337445	0.154717	2.88117	3.05101	-0.108808	2.67757	0.296937	-0.47322	-2.49141	-0.0451714	-0.696919	2.59508	-0.312768	-0.230181	2.6926	-0.241701	0.0510384	-0.0942948	-0.267134	-2.19564	-0.411533	0.327738	-2.96189	-2.24916	-2.20215	-2.58766	0.119615
Neural Progenitor Cell;ABT-737;trt_cp;0.12 uM;24 h	0.194703	0.58378	0.199282	0.0895211	0.400487	-0.251391	0.4767	-0.959513	0.166141	2.25254	0.213149	-0.379946	-0.313099	-0.12122	-0.0363161	-2.06954	0.212964	0.182519	0.548662	-0.0694472	1.04887	0.810986	0.958417	0.177378	-0.514812	-0.126871	-0.0752765	1.25178	-0.497055	2.54495	-0.524993	0.626992	3.18092	0.383565	2.50323	0.46416	-0.0923172	2.59419	0.188742	2.88631	-0.304277	2.64575	-2.74914	0.442123	2.21908
Neural Progenitor Cell;AZD-7762;trt_cp;0.12 uM;24 h	-0.437704	2.46966	1.82564	2.16108	0.114158	0.135049	-0.106144	-0.663009	0.446971	2.02719	2.6983	0.17354	0.233677	2.49853	2.88444	0.033865	2.2053	0.0526777	2.54792	2.65254	3.42401	3.36089	0.502959	2.75375	0.217949	-0.246632	-2.28127	0.65639	-0.720669	0.516564	-0.225706	-0.0755898	3.09792	0.12166	2.22114	0.0914767	-0.414208	-2.23117	-0.448743	2.47332	-2.57086	-1.8053	-2.32325	-2.43075	2.67289
Neural Progenitor Cell;NU-7026;trt_cp;0.12 uM;24 h	0.869498	2.62397	2.72199	-0.00663243	2.4188	2.20968	0.731892	-0.39943	2.14768	2.84272	2.34237	3.64659	0.538879	0.592292	2.9122	-0.556758	0.0301386	-0.181908	2.48229	2.67632	3.15072	2.27711	0.7994	0.426583	0.491477	-0.688072	-2.74873	0.999652	-0.805166	2.74383	-0.333184	-0.09668	2.99571	-0.189145	3.08404	0.302354	-0.441273	2.73199	-0.533548	2.73757	0.154718	-0.516064	-2.98803	0.701974	2.57666
Neural Progenitor Cell;C-646;trt_cp;0.12 uM;24 h	-2.18581	2.09313	-2.07689	0.130764	-2.04177	-2.0903	1.84423	-2.34413	-0.0828614	-0.00676057	0.0247968	0.529167	-0.427855	-0.110264	0.206998	-0.125884	-0.396616	-0.282461	0.136728	-0.000173211	0.816481	2.67723	0.713171	0.499804	1.94959	-0.41686	-0.573484	1.05065	-0.553219	2.73488	-0.531677	0.501388	2.85297	-2.61071	1.13189	0.0378945	-0.556675	0.335543	0.00139187	2.32754	-0.0640176	0.4421	-0.0209991	0.338825	0.841223
Neural Progenitor Cell;PFI-1;trt_cp;0.12 uM;24 h	-0.343984	2.39055	2.10134	-0.139942	1.70325	-2.05197	-0.383739	-0.537859	-1.65961	1.80861	0.582599	0.257973	0.283728	2.64057	0.139908	-0.229402	2.41334	0.85304	2.81971	0.363573	3.37887	3.32175	2.45337	2.88426	0.385672	-0.390665	-2.20107	0.239332	-0.373228	2.71875	-0.650251	0.0955461	3.2772	0.0572925	-2.06916	-0.215972	0.0028555	-0.368334	0.0228059	2.40191	-3.26546	-1.88996	0.027942	-2.57512	-0.145633
Neural Progenitor Cell;decitabine;trt_cp;0.12 uM;24 h	0.236593	2.67435	2.60596	2.26039	0.367837	-0.226846	0.240577	-0.0300085	1.67195	2.08452	3.093	0.24003	0.31646	0.553567	0.439407	2.60531	2.05319	0.0360757	2.71413	2.65571	3.14263	3.17139	0.543947	2.68376	-2.13887	-0.0245697	-2.48254	-0.0550802	-0.435741	2.78628	-0.384876	0.312424	3.38936	0.189356	2.41484	0.169861	-0.397721	-2.31354	-0.364903	0.3327	-2.19523	0.122948	2.59655	-2.16971	2.52273
Neural Progenitor Cell;KIN001-270;trt_cp;0.12 uM;24 h	-0.0470067	0.197709	0.0495595	-2.0557	-0.102916	-0.189796	0.0990147	-1.92688	-0.127587	0.0419675	2.44222	0.552696	-2.76024	-2.69203	-0.133019	-1.95445	-0.206679	-0.206466	-2.17659	-0.120657	0.106392	0.330087	0.00720984	0.00752509	-0.0340427	-0.280545	-0.290022	0.740654	-0.506592	2.60561	-0.550591	0.0506421	0.307894	-2.30457	-2.53148	-2.88347	-0.418706	-2.76854	-2.44188	0.281243	-4.49607	-0.388894	-2.973	-3.17799	-2.14922
Neural Progenitor Cell;UNC-1215;trt_cp;0.12 uM;24 h	-0.43985	0.284635	0.305899	-2.20301	-0.691184	-2.06958	-0.468678	-0.560443	-2.24888	0.224273	2.52741	-0.30622	0.133658	2.67066	2.75197	0.103869	2.43504	0.124859	2.31731	2.39276	3.47565	3.65322	0.799403	2.82022	-2.09973	0.359008	0.0105049	0.619568	-0.718886	2.07027	-0.27504	0.405605	3.04973	0.430922	2.05822	0.309316	-0.342328	-2.36445	-0.221622	2.17723	-2.80125	2.09496	-0.20818	-2.19759	-0.703547
Neural Progenitor Cell;SB-203580;trt_cp;0.12 uM;24 h	-0.859893	-0.0808856	-0.41924	-0.314868	-2.81266	-2.44051	-0.673745	-0.391132	-2.36722	-0.578968	0.105697	0.158927	-2.4314	0.0240866	-2.18002	-0.32442	0.321238	0.549784	-0.126543	2.28769	2.61384	3.38565	-2.65854	2.57438	-0.0339944	-0.44924	-2.31484	-2.83293	-0.737906	2.44871	-0.616269	0.269665	3.09744	-0.335387	2.13378	-0.151482	-0.0587026	-0.309727	-0.335116	2.56567	-2.7701	-2.40751	-0.0228595	-2.44261	0.129353
Neural Progenitor Cell;BAY-61-3606;trt_cp;0.12 uM;24 h	-2.5342	-2.21896	-2.13505	-0.0789104	-2.90464	-2.54363	-2.26935	-1.95372	-2.67045	-2.13196	-0.157709	0.0963318	0.213895	2.41194	2.41374	-0.297795	1.94682	0.332435	0.174066	0.284838	3.24987	3.19142	0.325999	2.73801	-0.0231472	0.170243	-1.97137	-0.016583	-0.56514	2.33415	-0.794656	0.4122	3.13904	-0.154364	0.109296	0.323832	-0.208053	-2.53968	-0.372559	0.00773641	-2.74238	-0.0914317	2.16976	-2.51621	0.306591
Neural Progenitor Cell;HG-9-91-01;trt_cp;0.12 uM;24 h	2.13623	2.36069	2.06118	-0.00681571	1.77642	0.258524	1.95636	-0.85542	1.77107	0.337718	0.202167	0.0703678	-0.395017	-0.356368	0.0243286	-0.148577	2.89121	2.51217	-0.159536	2.10452	0.966661	3.19473	3.10329	2.03527	-0.0230214	-2.09068	-0.418485	1.05002	-0.623066	2.89293	-2.31768	-0.212875	0.546119	-0.0756335	-2.57319	-2.75154	-2.99663	-2.32749	-2.21358	0.221619	-4.30516	-2.7586	-3.33779	-3.20788	-3.34299
Neural Progenitor Cell;GW-5074;trt_cp;0.12 uM;24 h	1.84218	2.4594	2.18668	2.22539	0.482638	0.12721	-0.375265	-0.385589	0.77024	2.1583	2.62711	-0.186129	2.50186	2.79417	2.84906	0.0530743	2.75165	0.470573	3.0729	2.77679	3.5131	3.67888	0.185806	3.10618	-1.91577	-0.0762652	-2.66317	0.0227158	-0.702971	-0.0629373	-0.273512	0.172807	2.7708	0.441883	0.267265	0.0909406	-0.457572	-2.45446	0.080726	0.382241	-2.92973	-2.15019	-0.254377	-2.69567	2.43228
Neural Progenitor Cell;BRD-K29983336;trt_cp;0.12 uM;24 h	-0.673689	2.35482	1.7618	0.0159743	-0.130927	-0.339792	-0.0406644	-0.47871	-1.77328	1.94466	0.432269	0.422845	0.232002	2.46703	2.57453	-0.449385	2.46604	0.445463	0.0259129	0.189432	3.25822	3.28239	0.152466	2.59529	0.583466	-0.503724	-2.32306	0.43021	-0.509364	2.66656	-0.455023	-0.0791203	3.13977	-0.164509	2.20694	0.185919	-0.405892	-0.385538	-0.179493	0.255089	-2.9723	-2.10432	-2.21109	-2.65574	0.182325
Neural Progenitor Cell;everolimus;trt_cp;0.12 uM;6 h	-2.78047	-2.69105	-2.65574	-0.418275	-3.03456	-2.5121	-2.56048	2.65899	-2.6113	-2.44179	0.546596	3.564	-0.39211	-0.502073	0.501949	0.618422	-3.72314	-0.527487	-2.99607	-0.99732	-0.971233	-2.69339	-0.928481	-2.61529	0.0129253	0.150492	0.19906	-0.0153265	0.71004	0.603047	0.0992751	1.08183	0.829554	-4.16938	0.439045	-0.135464	0.608048	-0.656232	-2.65171	0.546376	-0.802349	-0.254031	2.62512	-0.424053	0.764255
Neural Progenitor Cell;tivozanib;trt_cp;0.12 uM;24 h	2.1704	0.88989	0.731423	0.283144	0.600421	0.136642	0.538705	-2.10082	0.742902	0.738534	0.315578	0.107623	-0.195267	-0.301181	0.00488885	0.286295	0.184718	-0.406597	0.183669	0.40826	0.770065	2.63174	0.484678	0.667655	-0.409269	-0.416369	0.0994815	0.917429	-0.448302	2.82395	-0.343573	0.348592	0.71606	0.0472123	-0.338762	-0.386223	-0.421286	-0.239548	-0.680212	2.10487	-3.66332	0.0534193	-0.244613	-2.64896	0.325458
Neural Progenitor Cell;AZD-1480;trt_cp;0.12 uM;24 h	-2.44015	-0.0458542	-0.312715	-0.349178	-2.63551	-2.43365	-2.17802	-2.67018	-2.2732	-0.200921	0.101433	-0.0887074	-0.212962	-0.0278183	0.100855	0.101623	-0.299807	-0.135159	0.0975024	0.0419406	0.844048	0.664847	0.615846	0.613047	0.677143	-0.270464	-0.247238	0.887729	-0.517486	2.63258	-0.453154	0.64461	3.08177	-0.470612	0.682404	0.1977	-0.018893	2.4755	0.0117989	2.39704	-0.48679	2.26968	-0.0691327	0.601595	2.26438
Neural Progenitor Cell;PF-04217903;trt_cp;0.12 uM;24 h	2.4678	2.46583	2.47594	2.32722	0.761084	0.0987777	0.732318	-0.15046	0.904209	0.75475	0.142722	0.0752152	-0.150324	-2.3542	0.0853226	0.0628403	0.303012	-0.0946608	1.89138	0.402965	1.08119	2.72991	0.424415	0.890803	-1.73809	-0.558085	-0.424025	0.866902	-0.678185	2.55249	-0.753874	-0.116036	0.959496	0.0628165	-0.221118	-0.249072	-0.632559	-0.186559	-0.469043	2.42931	-3.58118	-0.433163	-0.339994	-2.9168	0.642665
Neural Progenitor Cell;VE-821;trt_cp;0.12 uM;24 h	0.10097	2.26302	2.23588	0.192931	0.451029	0.175049	-0.328092	-0.807432	1.4499	2.14863	2.92274	0.453995	0.18733	2.74425	2.61051	2.00073	2.41232	0.503008	2.7212	2.51012	3.50204	3.2287	0.547884	2.64487	-1.5944	0.0186551	-0.528553	0.586322	-0.418068	1.0535	-0.34152	-0.191011	1.33534	0.315884	-0.0972501	-0.0259342	-0.318248	-0.269428	-0.163642	0.122178	-3.14891	-2.01729	-2.70892	-2.32424	2.12199
Neural Progenitor Cell;XMD-1499;trt_cp;0.12 uM;24 h	-1.88889	2.19505	0.209501	-0.00911242	-2.50961	0.152899	-0.325725	-0.546497	-0.241782	0.46962	3.07978	0.693497	0.261193	0.420987	2.92979	2.35238	-0.125875	-0.0720643	-0.172843	0.278002	0.794204	2.84452	0.197812	2.74267	0.484173	0.0262471	-2.54963	0.41314	-0.529008	0.695292	-0.240361	0.0171332	2.98046	-0.379858	0.582914	-0.282636	-0.402856	-2.46778	-0.648354	2.44447	-2.34365	0.158437	0.384554	0.0259243	2.82673
Neural Progenitor Cell;alectinib;trt_cp;0.12 uM;24 h	-0.670937	2.28835	0.458288	2.22748	0.462603	-2.19038	-0.0451131	-2.37082	-0.152481	0.493587	2.34902	0.530769	0.379758	0.489935	0.55756	0.443603	0.0252327	-0.0534436	2.51445	2.51791	1.28969	3.14344	0.892945	2.76758	0.497283	0.0561581	-0.335779	0.709546	-0.331166	0.899742	-0.524997	0.145186	3.38469	-0.18186	0.535895	-0.0381544	-0.684562	0.109429	0.0390251	0.449398	-0.232939	0.039708	0.182394	0.423641	0.799179
Neural Progenitor Cell;KW-2449;trt_cp;0.12 uM;24 h	2.39863	2.42958	2.44569	2.00323	2.01391	0.35723	2.26161	-0.288754	2.06769	0.652238	2.25031	0.308792	0.404764	0.198431	0.353	1.83195	2.349	0.143838	0.506478	2.66065	1.1817	3.09152	0.691991	2.85204	0.00909208	-0.452473	-2.25878	0.559025	-0.452869	2.79518	-0.466573	0.0282264	0.529062	0.196916	-2.11276	-0.428267	-0.367493	-2.34027	-0.563012	2.17415	-3.65018	-2.41434	-0.134314	-2.85109	0.0569947
Embryonic Stem Cell;AST-1306;trt_cp;0.12 uM;24 h	0.192283	0.592975	0.355061	0.367449	0.671226	0.0665311	0.234467	0.244774	0.481297	0.215797	0.222849	-3.33044	-3.51035	-3.10758	0.0690814	-2.74646	0.121683	0.13769	-0.172648	-0.411096	0.144749	0.445485	-3.08781	-2.43006	-2.32732	-0.0421595	0.292531	-0.0216629	-2.35817	0.54154	0.0096385	0.676486	-2.73851	-0.041082	-2.33301	3.05442	3.03126	-2.76187	0.797494	-0.0987001	-3.98931	2.38139	-2.56888	-2.9804	-0.256011
Embryonic Stem Cell;HG-14-10-04;trt_cp;0.12 uM;24 h	0.114066	0.496584	0.245582	0.326485	0.638261	-0.00171656	0.290453	2.10832	0.404901	0.204213	-0.103919	-3.37402	-3.80568	-3.36849	-0.278872	-2.78586	-0.36927	-2.5076	-0.473028	-0.675329	-0.174399	0.0601926	-3.16762	-2.8151	-2.53777	-0.00273264	0.615031	-0.0700086	-2.1935	0.58526	0.0846957	0.902789	-2.69515	-0.174552	-2.42206	3.06791	3.24153	-2.50847	0.874938	-0.10161	-3.97838	2.57549	-2.56713	-2.64974	0.0165808
Neural Progenitor Cell;pyrazolanthrone;trt_cp;0.12 uM;24 h	-2.33595	0.28056	0.0216877	2.21599	-0.124109	-2.54725	-0.265914	-0.723657	-0.333742	0.0877197	2.38631	-0.0224378	0.0774794	0.182198	0.213062	-0.190338	0.21449	0.111754	2.2543	2.37908	1.05058	3.19641	0.113634	2.63816	0.159044	-0.0272826	-0.351232	0.310632	-0.511265	2.34652	-0.562415	0.572908	2.92927	-0.272313	2.59574	0.122434	-0.3601	-0.101801	0.265038	2.38604	-2.42849	-0.106845	-2.07631	0.0112241	2.52047
Neural Progenitor Cell;BI-2536;trt_cp;0.12 uM;24 h	2.08505	2.59459	2.11302	2.12647	0.502712	0.0769761	0.0151726	-0.709422	0.429616	2.24542	2.56681	0.769703	0.377826	0.585728	2.81622	0.0258077	0.256419	-0.00208191	2.57112	2.32176	3.54283	3.21226	1.23377	2.69251	1.97779	0.0116098	-0.205168	0.927572	-0.589886	2.47805	-0.489438	-0.542568	3.34742	-0.0319598	2.67888	0.105351	-0.319685	-0.100189	-0.557342	2.43136	-0.0817743	1.73997	-2.5538	0.337993	2.37659
Embryonic Stem Cell;BMS-777607;trt_cp;0.12 uM;24 h	0.108303	0.425358	0.106797	0.113381	0.646549	-0.0730903	0.00334117	0.0956001	0.449731	0.154997	0.10078	-3.45742	-3.63732	-3.35146	-0.0374455	-2.81298	0.255154	-0.267381	0.159545	-0.534445	0.213861	0.371789	-3.06223	-0.642082	-2.24278	0.0532147	0.225672	2.37122	-2.41029	0.604167	-2.30455	0.666085	-2.64658	-0.099554	-0.0182396	3.45003	3.29085	-2.63103	0.700342	2.32837	-3.85147	2.46591	-2.19537	-2.66541	0.144584
Embryonic Stem Cell;BMS-509744;trt_cp;0.12 uM;24 h	0.024725	0.477608	0.141909	0.243151	0.726597	-0.173026	0.112745	0.0237864	0.512986	0.0647391	-0.165818	-4.06254	-3.81372	-3.67286	-0.586649	-2.96365	-0.361326	-0.404407	-0.273336	-0.84129	-0.288064	0.0561366	-3.56045	-0.959672	-2.51231	0.183839	0.895603	0.0815282	-2.32464	0.769531	-0.183122	1.06389	-2.88057	-0.221996	-0.090856	3.67048	3.57955	-0.32764	2.98208	2.3155	-3.75547	0.954213	-2.57579	-0.191686	2.49371
Embryonic Stem Cell;BS-181;trt_cp;0.12 uM;24 h	-0.0357945	0.304539	0.068732	0.142939	0.453655	-0.14306	0.0275495	2.29247	0.278314	-0.0420659	-0.0669811	-3.39243	-3.56035	-3.4425	-0.264932	-2.82853	-0.358945	-2.57023	-0.589064	-0.968656	-3.03185	-0.544551	-3.43013	-3.08384	-2.52904	0.0146378	0.543135	0.250733	-2.21285	0.516802	-2.08741	0.981987	-2.77466	-0.315292	-0.255847	3.17631	3.29031	-0.7216	2.64371	0.00855553	-3.76198	0.937961	-2.5747	-2.48018	0.269277
Neural Progenitor Cell;masitinib;trt_cp;0.12 uM;24 h	1.92049	2.39556	0.793734	2.0401	2.21539	-0.187479	2.28317	-2.12309	0.384191	0.682305	-0.449717	0.0833486	-3.0171	-2.65892	-0.244552	-2.34361	2.3596	-0.0337835	2.07321	2.33448	0.930084	2.70338	0.489189	0.56613	0.186898	-0.384634	-0.140114	0.759012	-0.622055	2.86828	-0.596318	0.102801	0.917135	-0.097665	-1.9611	-0.144992	-0.13596	2.2716	-0.318045	2.71008	-3.70484	-2.3593	-2.65204	-2.62365	2.02154
Neural Progenitor Cell;amuvatinib;trt_cp;0.12 uM;24 h	2.61787	2.57394	0.848028	0.170922	0.897492	0.387036	0.8126	-0.343506	0.869624	0.871371	-0.107566	0.202327	-0.219114	-0.415934	0.179731	-0.390195	-0.0581701	-0.28809	0.296888	0.268718	0.87847	0.43851	0.460605	0.27356	0.262823	0.0217695	0.0255895	1.17209	-0.463059	2.71286	-0.826328	0.349809	0.543065	0.188927	0.566011	0.433014	-0.228886	0.11166	-0.233312	2.65097	-0.345349	0.31802	-0.342011	-0.0124608	0.548204
Neural Progenitor Cell;GSK-J1;trt_cp;0.12 uM;24 h	-1.8895	0.455039	0.132817	0.19204	0.347583	-2.25432	0.157845	-2.28392	-0.0417967	0.208103	0.0529064	-0.425928	-0.371173	-0.175223	-0.205207	-2.07107	0.338582	0.46125	2.34092	-0.0624565	0.930061	2.96314	0.520628	0.608661	-1.99471	-0.172144	-0.121131	0.67856	-0.428891	2.5567	-0.687885	0.514243	2.89783	-0.00283319	0.261208	0.511925	-0.0900274	0.243662	0.360944	2.37491	-3.15743	2.22962	-2.41957	-2.28284	-0.25145
Neural Progenitor Cell;veliparib;trt_cp;0.12 uM;24 h	-0.320834	2.31643	1.939	-2.20694	0.147469	-1.89438	-0.161243	-0.650262	0.166087	1.85306	2.54101	0.444291	0.542896	2.63432	2.87657	0.0171461	2.29755	0.269664	0.185342	2.43044	3.08763	3.15533	0.226541	2.73815	0.486284	0.0362708	-2.42963	0.289362	-0.564118	2.47751	-0.371983	0.099019	2.82858	-0.255346	2.49897	0.286333	-0.047241	0.218624	-0.250923	2.22837	-2.27178	-0.344283	0.326835	0.289776	2.73924
Neural Progenitor Cell;olaparib;trt_cp;0.12 uM;24 h	-2.18722	0.0811449	0.0166684	-0.199246	-0.394155	-2.2429	-1.92334	-0.407797	-1.98762	-0.0868923	2.73853	0.304735	-0.17312	-0.00996027	0.360235	0.226906	0.141298	-0.0216679	2.23586	-0.00869415	0.863714	2.93421	0.0930299	0.686189	2.0699	0.0443497	-0.262063	0.671502	-0.267366	2.57157	-0.428788	0.469052	3.18981	-0.327288	0.771663	0.0201655	-0.0935498	0.21646	-0.0917007	0.594087	-0.259628	0.533045	0.328079	0.494042	2.71557
Endothelial Cell;BRD-K55591206;trt_cp;0.12 uM;24 h	0.434101	0.508026	0.312455	-0.207971	0.68031	0.288589	0.368522	0.707141	0.266751	0.178995	-0.219751	3.80169	0.248243	0.159594	3.32488	-0.812307	1.11778	-0.829388	-0.443429	-0.751316	0.636133	-3.03172	0.0529952	2.06832	2.95145	1.69524	-0.247521	3.29537	-0.681641	0.426308	0.669123	-2.5837	3.44335	-0.381686	2.6315	0.764315	0.598122	2.28931	-0.130752	3.58636	-0.127896	2.87219	0.341786	-0.0542683	0.683273
Neural Progenitor Cell;GSK-J4;trt_cp;0.12 uM;24 h	1.92629	2.63325	1.8137	2.59467	0.883806	-0.0848602	2.14294	-1.82229	0.542907	0.672242	2.64239	0.326589	0.309611	2.23439	2.71363	1.85527	2.64436	-0.0864755	2.65447	2.76975	3.65784	3.25484	1.1505	2.95176	-0.0092522	-0.298035	-2.39028	0.7955	-0.483629	2.92479	-0.584745	0.214481	3.05765	0.354336	2.6673	0.171135	-0.70646	0.0230236	-0.282216	2.59294	-0.332106	-0.0137462	-2.28807	-0.212276	0.693181
Neural Progenitor Cell;ALW-II-49-7;trt_cp;0.12 uM;24 h	2.2659	2.71986	2.28478	0.354029	2.42789	0.465956	2.46543	-0.660887	2.54973	2.34561	2.37053	0.315959	-0.38008	-2.52536	0.670474	-2.04566	0.217354	-0.349269	0.306335	2.42632	1.02373	0.344993	0.63924	0.305122	0.0920866	-0.397539	-0.346328	1.37227	-0.757078	2.64571	-0.56661	-0.0467066	0.422219	0.376191	-0.0187147	0.221782	-0.0561887	0.240099	-0.100765	2.86973	-3.09747	-0.0598665	-0.587719	-0.42348	0.342058
Embryonic Stem Cell;sunitinib;trt_cp;0.12 uM;24 h	0.0900796	0.462082	0.177646	0.354502	0.60166	-0.0413473	0.128391	0.291246	0.488037	0.16391	0.203052	-3.37309	-3.62615	-3.15959	0.0716809	-2.77809	-0.134687	-2.47956	-0.418067	-0.514162	-0.267825	0.101614	-3.31814	-2.86405	-2.46685	-0.0739164	0.480147	2.40056	-0.356994	2.98858	-0.0428792	0.786511	-2.69898	-0.388353	-2.47895	3.02767	3.00193	-2.63669	2.54385	-0.00492668	-4.16362	0.995827	-2.97078	-2.96871	-0.154026
Neural Progenitor Cell;ZM-447439;trt_cp;0.12 uM;24 h	-0.347178	2.34342	1.93833	0.321515	-2.0991	-1.7663	0.184371	-0.568469	-1.48795	1.7955	2.46297	0.714971	0.458652	2.69438	2.89039	-1.82872	1.9556	0.247405	-0.188058	0.087334	3.12597	2.88804	0.536107	2.26511	0.259071	-0.204677	-0.484437	0.363287	-0.514331	2.46247	-0.407281	-0.078776	3.37635	-0.0721646	2.30151	-0.131831	-0.423161	-2.23598	-0.454791	2.0959	-2.53018	-1.89996	-0.148337	-0.0735916	2.46338
Neural Progenitor Cell;OSI-930;trt_cp;0.12 uM;24 h	0.196021	0.460593	0.156039	0.11411	0.221587	0.00813086	0.195886	0.150617	0.28452	0.348043	0.401066	0.128403	-0.327895	-2.70677	0.165559	1.86756	-0.0243386	-0.285244	-2.21705	-0.0171058	0.523747	0.494806	0.235081	0.549998	-0.211758	-0.0627199	-0.251581	0.751197	-0.440253	2.76636	-0.564485	0.371842	0.507549	-0.226588	-0.158977	-0.189096	-0.269636	-0.48064	-0.761273	2.3236	-3.69859	-0.221648	-0.202336	-3.04072	0.640119
Neural Progenitor Cell;methylstat;trt_cp;0.12 uM;24 h	-0.195422	2.43455	0.351084	0.188614	0.283689	-2.27268	2.18952	-0.550627	0.200125	2.06924	2.47479	0.164011	-0.152876	-0.193116	0.207402	-0.33621	0.0426639	0.0404704	0.42613	-0.0744929	1.03803	0.550345	0.697775	0.325184	-0.407374	-0.0910716	-0.0539294	1.13712	-0.514492	2.66709	-0.664338	0.13842	3.40257	-0.262649	0.633814	0.0593884	-0.155139	0.600758	0.120293	2.54534	-0.418368	0.693661	-0.29097	0.372044	2.7118
Embryonic Stem Cell;PF-04217903;trt_cp;0.12 uM;24 h	0.259428	0.582352	0.27245	0.284855	3.03235	0.298213	0.24509	0.176944	0.596841	0.417118	0.311308	-3.28584	-3.39595	-2.9025	2.47879	-2.5708	0.196592	0.445959	0.26504	-0.425486	0.347866	0.457183	-0.644444	-2.39835	0.0584064	-0.0868728	0.0391948	-0.014596	-2.34249	0.58289	-0.090932	0.605577	-2.8372	-0.0765455	-2.50078	3.30784	3.26366	-2.46331	2.68649	0.167144	-3.95856	2.31801	-2.40476	-2.79175	-0.112469
Embryonic Stem Cell;BRD-K68336408;trt_cp;0.12 uM;24 h	-0.00320961	0.289904	0.0820276	0.284778	0.503125	-0.0763742	0.00139766	0.246753	0.371077	0.115681	0.037422	-3.34811	-3.55682	-3.16838	-0.203174	-2.74955	0.0895403	-2.4402	-0.347446	-0.694885	-0.231999	0.114	-3.17963	-2.97337	-2.41824	-0.108379	0.349407	0.0201641	-2.27192	0.617627	-0.0778034	0.718104	-2.72679	-0.286456	-2.47213	3.05096	3.07863	-2.67474	2.56643	-0.120291	-3.97252	2.27985	-2.68189	-2.7944	0.0968031
Embryonic Stem Cell;GSK-1059615;trt_cp;0.12 uM;24 h	0.177828	0.563964	0.328458	2.52158	2.78812	0.0998341	0.218792	0.267651	0.487344	0.174357	0.265083	-3.39931	-3.54693	-3.23938	-2.48565	-2.69666	-0.0122737	0.264617	-2.46324	-0.620635	-2.67894	0.250761	-3.27394	-2.74929	-0.0712523	0.0186668	0.39401	-0.168549	-2.28446	0.364242	-2.28943	0.699796	-2.79429	-0.221187	-2.25644	3.0938	3.23915	-2.36327	0.689664	-0.0334655	-3.93652	2.21436	-2.7335	-2.83908	-0.120914
Embryonic Stem Cell;GDC-0068;trt_cp;0.12 uM;24 h	0.190355	0.520776	0.270476	0.329319	2.82628	0.315625	0.131593	0.259329	0.575448	0.399292	0.304658	-3.17478	-3.40682	-2.90446	0.152268	-2.75365	-0.0452794	0.147857	-0.376214	-0.614854	-0.0459789	0.143821	-3.14545	-2.64458	-2.39256	-0.212161	0.0962015	-0.120022	-2.33378	0.471062	-2.01618	0.606822	-2.82842	0.034083	-2.62571	2.81462	3.02844	-2.56031	2.47821	-0.286825	-4.33351	2.20103	-2.78742	-2.93302	-0.174479
Neural Progenitor Cell;BRD-A92800748;trt_cp;0.12 uM;24 h	-1.87772	0.123736	0.216991	-0.00963922	-0.256194	-0.147015	-1.85847	-0.838043	-0.375156	0.213549	2.48209	0.175273	0.0913797	0.267459	0.157038	0.0144949	-0.0669152	0.273216	2.14161	-2.37944	1.09155	2.735	0.252343	0.480925	-2.4386	-0.0433183	-0.238221	0.6186	-0.355843	2.35821	-0.462391	0.304152	3.20853	-0.00532966	0.628586	-0.0491548	-0.0431365	0.185554	-0.151328	0.448118	-2.2073	2.29617	-0.0165245	0.565584	2.65669
Neural Progenitor Cell;SB-525334;trt_cp;0.12 uM;24 h	0.0566919	0.035505	0.103102	-2.16216	-0.0229898	-0.285307	-0.211866	-0.260659	-0.145744	-0.138148	0.211319	-0.00692192	-0.388977	-2.70252	-0.145005	-1.95141	0.0702141	-0.182191	-0.220542	-0.0463565	0.482643	2.59212	0.0253301	0.652363	-2.53812	-0.446029	-0.271413	0.420679	-0.548131	2.82031	-0.712798	0.353579	0.434202	-0.160711	-2.28912	-0.572995	-0.702357	-2.99346	-0.352493	-0.0480433	-3.99615	-0.0810254	-2.68146	-3.17702	0.197531
Epithelial Cell;BRD-K09784055;trt_cp;10 uM;24 h	-0.46915	-0.378275	-0.571329	-0.329747	-0.290578	-0.18441	-0.0894355	-0.15652	-0.0791759	-0.449843	2.98005	0.294571	3.23334	2.45014	3.05365	3.28871	-2.72855	-2.99484	-0.524108	-0.452923	-2.94849	-2.79927	0.78368	-2.94491	0.68364	0.968192	0.219358	3.03417	1.0201	1.30818	0.323582	-2.49531	-2.58222	-3.9464	0.171238	-2.50683	-0.208217	0.764317	0.567852	3.60817	-0.230154	2.17982	0.151655	0.030171	0.753668
Epithelial Cell;BRD-A19037878;trt_cp;10 uM;6 h	0.122289	-0.211073	1.90783	-0.544978	1.96974	2.1866	0.382549	-0.112895	2.35241	-1.72002	-0.403154	0.223169	-0.4222	-0.306999	-0.160814	-1.06956	-2.33115	0.478571	-0.208285	-0.547374	0.11343	-3.23381	-3.09822	-0.83071	-0.176708	2.18048	3.07352	0.764186	0.929246	0.155395	0.134568	0.0781733	0.514374	2.95861	-3.07837	2.66805	2.67666	0.861883	0.323824	-0.551429	-2.84994	2.30597	-0.658366	-0.2075	-0.209686
Epithelial Cell;thioridazine;trt_cp;10 uM;6 h	2.13392	0.0724991	2.35952	0.374274	0.373724	0.171203	0.650871	-0.226286	2.24693	0.140171	-0.577165	-0.546336	-0.760654	-0.35681	-2.65855	-0.619555	3.09935	0.966201	0.231126	2.50405	3.43766	2.22639	3.7283	-0.458382	-0.540219	0.358543	0.543987	0.081341	-0.121283	0.14618	1.17847	-0.552052	-0.492215	3.30959	-0.697367	-0.162083	-0.296172	0.0158507	-2.12606	-0.376609	-2.69135	0.419737	-3.28197	-2.41669	-3.52942
Epithelial Cell;TBEP;trt_cp;10 uM;6 h	-0.12261	-0.77148	-0.384736	-0.202466	-0.289647	-0.227985	-0.42763	-2.61483	-0.472235	-0.122629	-2.91207	-1.059	-3.54816	-2.83867	-0.80753	-0.207825	-0.500172	-2.69078	-3.83374	-3.28937	-0.0959571	-2.8297	-2.86876	-0.627038	-1.09082	-1.70793	2.26134	-0.47137	-0.476628	-2.24439	0.738461	2.32091	-3.41488	0.646993	0.00556287	-3.57799	-3.82786	2.68612	0.782651	-2.83232	0.27367	2.69555	-3.27923	2.7894	2.55412
Epithelial Cell;triprolidine;trt_cp;10 uM;24 h	2.83063	0.0368505	2.37256	-0.182815	0.274581	2.45056	-0.225712	-0.0492508	2.67466	2.62801	0.0298801	-0.128211	-0.134393	0.0719389	0.125815	-0.327886	3.00958	-0.0821072	-0.611526	-0.177241	0.0867294	-0.0777139	-0.698435	-0.0102586	2.16402	0.387647	-0.751493	0.168456	-0.381112	-0.627993	2.17946	-1.04706	-3.26205	0.024648	-0.0545601	0.339314	0.772249	-0.174259	-2.48575	-0.157963	2.60527	0.000724736	-0.158341	-2.62551	2.57056
Neural Progenitor Cell;nifurtimox;trt_cp;10 uM;24 h	-0.707596	-1.19325	-1.44403	-1.19264	-0.705065	-0.399836	-3.38405	-0.0516118	-0.244342	-0.574532	2.91465	0.465583	-2.11818	-2.56417	2.72859	2.73812	0.197266	-2.73105	-2.45018	2.37057	-2.71141	0.0482687	0.155012	-2.75785	0.632516	-0.232213	-2.44987	2.95847	0.585415	0.571873	-0.247094	-0.605474	-2.68479	-3.43243	2.75085	-0.440882	2.63122	0.800829	3.02165	2.88563	-0.338889	-0.452919	0.559169	-2.59626	0.520097
Neural Progenitor Cell;ioxaglic-acid;trt_cp;10 uM;24 h	-0.402495	-0.439019	-0.869808	-0.710642	-0.196561	-0.222852	-0.857877	0.0431319	0.0429757	-0.46643	3.04997	0.582471	-0.0223776	-2.937	2.81777	0.601854	0.41039	-0.26986	-2.58047	2.78164	-2.68538	-0.375826	0.474119	-0.410854	0.712884	-0.529102	-2.59916	2.73756	0.687704	0.55728	-0.225434	-2.90462	-2.82686	-3.17865	2.53423	-0.623691	2.62185	0.45654	2.79795	2.91674	-0.221288	-0.841822	2.82415	-2.87633	0.489106
Neural Progenitor Cell;thalidomide;trt_cp;10 uM;6 h	-0.192905	-0.298012	-0.529164	-3.01506	-0.5376	-0.0773934	-0.479224	0.265549	-0.236146	0.0511129	2.84921	-0.00747435	-0.588341	-0.169762	0.382759	-0.0830242	-0.0628831	0.0341545	-3.06306	-3.08674	-0.126583	0.00114831	-3.24949	-2.28441	-0.389694	0.207821	-2.6469	3.29366	0.139169	2.72877	0.0382317	0.893073	-0.0947099	-3.15392	2.89249	2.79233	3.9482	0.29318	0.328482	3.19443	0.441173	2.56577	2.53228	0.244781	3.16976
Neural Progenitor Cell;ABT-737;trt_cp;10 uM;24 h	-0.248158	-0.236953	-0.142309	-0.226024	-0.552526	-0.56788	-2.43409	-2.02437	-0.48791	-0.0569674	-0.0535402	-0.0167376	-0.0683441	0.0585688	-0.170812	-0.173705	-0.251985	0.0383907	2.41888	-0.361487	1.14483	0.333128	0.429908	0.488755	-2.33373	0.0850512	-0.0491561	1.00192	-0.393757	2.91144	-0.674984	0.792304	3.51262	-0.0189771	0.624069	0.406519	-0.176429	-0.623011	-0.0142646	0.408716	0.092851	3.02452	-0.115135	0.829777	3.66034
Neural Progenitor Cell;GSK-1059615;trt_cp;10 uM;24 h	1.85299	1.99699	-1.7908	0.0398396	0.00162238	-0.0426463	2.49704	-2.07761	2.15699	1.91266	0.0982764	1.00841	-0.189216	-0.0466302	0.0641006	0.206933	-0.286339	-0.547812	-0.0721889	0.620023	0.667544	-0.237608	0.977646	0.0768218	0.519948	0.0467089	0.319946	1.20423	-0.0894469	1.22601	-0.379412	0.303796	0.954311	-0.485133	1.39852	0.36164	0.277269	0.744341	-1.07797	1.05063	0.407245	0.569477	0.326623	0.54073	0.369907
Neural Progenitor Cell;SGX-523;trt_cp;10 uM;24 h	-1.71451	0.641366	0.429968	0.27429	0.216421	-2.35231	2.18353	-0.591533	0.0691309	0.500942	2.60064	-0.117245	0.172198	0.308829	0.399093	-0.134109	0.104627	0.227995	2.52109	2.68561	1.23909	3.18412	0.778657	0.613493	-1.65465	0.0390056	-0.109206	0.720013	-0.687626	2.43136	-0.374462	0.0231461	3.29875	0.142054	0.371411	0.43937	-0.0147316	0.0133562	-0.0683357	2.61618	-2.76004	2.37648	-0.159289	0.108851	2.47749
Neural Progenitor Cell;KIN001-055;trt_cp;10 uM;24 h	-0.307352	-0.112096	-0.0628842	-0.287039	-1.65368	-0.445363	-0.446221	-0.985639	-1.90961	0.112127	2.79967	0.821481	2.40864	2.84088	2.9617	0.0151127	2.3321	0.437873	-0.015396	0.226424	3.29078	2.71227	0.467853	2.79651	-0.00940628	-0.0200432	-2.86904	0.692658	-0.299182	2.4906	-0.409755	-0.501415	3.16008	-0.381637	-2.02089	-0.83891	-0.80381	-2.43472	-0.392367	-0.365302	-3.10715	-2.21036	-2.74812	-2.15327	0.294312
Neural Progenitor Cell;BRD-K68336408;trt_cp;10 uM;24 h	2.04173	2.06111	2.21372	-0.129528	2.18394	0.299262	2.29406	-1.88518	2.27247	0.447926	0.387835	0.701669	0.0582263	-2.49231	0.0183954	1.89839	2.86038	0.234946	2.43607	3.18396	1.27574	3.02387	1.00017	2.67826	0.59437	-0.372393	0.0691829	0.948973	-0.0971989	3.35077	-0.653703	-0.12091	0.364846	0.0173708	-2.54134	-0.394773	-0.179714	-2.61262	-0.380791	2.35172	-4.08795	-0.133288	-0.000308016	-3.0634	-0.192708
Neural Progenitor Cell;IOX2;trt_cp;10 uM;24 h	0.259049	0.549587	2.30495	0.00258431	1.98002	-0.177144	-0.00566033	-0.215872	2.03039	2.67679	0.566645	-0.0190195	2.6884	0.499004	2.78932	-0.204229	2.74933	0.44905	2.58722	0.445511	3.53005	3.32149	2.65417	2.66277	0.269521	-0.410419	-2.55829	0.187604	-0.907096	2.1082	-0.182311	0.0492221	3.1808	0.081494	2.50258	0.348887	0.121568	-2.15063	0.0277851	2.98945	-2.57829	-0.301409	0.240013	-2.88287	2.77963
Neural Progenitor Cell;JQ-1-R;trt_cp;10 uM;24 h	-2.72248	-0.171641	-2.57438	-2.7658	-2.48749	-3.00966	-2.35984	-0.247035	-2.49334	-2.37507	2.91602	-0.0574857	-0.761882	-0.598746	-0.168427	-0.0667225	-0.532757	-0.326168	-0.012498	-0.360391	1.76519e-05	0.0717946	-0.153448	-0.782806	-2.39347	0.229278	0.567876	0.739511	-0.229786	2.7593	-0.393824	0.507217	3.32267	-2.75936	0.121472	0.0796599	-0.131966	-0.343178	-0.403813	2.85491	-3.42183	3.04804	-0.383232	-2.7739	2.48538
Neural Progenitor Cell;CC-401;trt_cp;10 uM;24 h	-2.27352	-0.481006	-2.1805	-0.297262	-2.50003	-2.14378	-0.837118	-1.70107	-2.37633	-2.00009	0.683446	0.466766	0.823308	0.727565	3.12058	2.60792	-0.0910902	-0.68656	0.154558	0.58599	0.559653	2.02495	-0.485868	3.03617	2.6373	-0.0590486	-0.600496	0.0158559	-0.290359	-0.0221939	-0.433418	-0.0404607	2.95865	-2.74329	0.829507	0.494168	0.227713	-2.93794	-2.60028	2.55737	3.06539	-0.203932	3.38042	0.604507	3.65235
Embryonic Stem Cell;pazopanib;trt_cp;10 uM;24 h	-2.35786	-0.142677	-0.348942	-0.159449	0.381216	-0.278197	-0.424991	-0.0167212	-0.000820892	-0.1828	2.29691	-3.55068	-3.52651	-2.93628	-0.179711	-0.618319	0.215632	0.20065	-2.5922	-0.451833	-0.129677	2.76914	-3.21274	-2.43809	-0.470634	-0.0485591	0.234657	-0.157446	-0.423665	0.855276	-0.147109	0.770866	-3.15524	-0.0384618	-2.48205	3.0628	3.16429	-0.427477	2.84882	0.0579606	-3.90414	2.45612	-3.09164	-2.74936	-0.281605
Epithelial Cell;CMAP-CRCGN-CB7950998;trt_cp;10 uM;24 h	-0.232566	-0.420316	-0.497151	-0.0442721	-0.255624	0.140135	-0.142447	0.379057	0.0267922	-0.449122	2.66637	0.428996	2.30152	-0.0209713	2.51587	2.71653	-3.16178	-3.18105	-3.02118	-0.773713	-3.48241	-3.21787	0.468532	-3.69264	0.270736	0.840716	0.289007	3.02895	1.2246	0.803104	-0.0959496	-2.41053	-2.5964	-1.75768	0.418166	-3.24842	-0.475092	2.56197	0.525763	3.07071	-0.110222	0.660288	-0.051742	0.229954	1.08502
Epithelial Cell;CH-223191;trt_cp;10 uM;24 h	-0.187905	-0.53386	-0.635495	-0.260717	-0.394039	-0.0390524	-0.132597	0.0183369	-0.0397833	-0.260625	2.97707	0.251082	2.93918	2.34156	3.15802	3.11647	-2.39752	-3.23642	-2.86321	-0.243084	-3.09114	-2.91029	0.759839	-3.275	0.410318	0.820752	-0.00423476	1.57358	0.936756	1.08309	0.433931	-2.60511	-0.560676	-3.57629	0.277039	-2.75317	-0.411228	3.00624	0.361109	3.46996	0.0813569	2.42784	0.273144	-0.0497579	0.970305
Epithelial Cell;geldanamycin;trt_cp;10 uM;6 h	-0.0900927	-0.282133	0.134157	0.276909	-0.139815	-0.221857	0.402314	-0.891173	-0.155855	-0.42596	-3.56844	-2.71517	-3.3784	-3.21718	-2.58197	-3.32441	-0.524147	0.304037	-0.664317	-3.18216	3.11233	-3.07998	0.061404	-1.37759	-0.973815	1.9565	3.3761	3.12126	-0.114339	2.74618	0.47626	-0.234879	-0.382111	3.21961	-3.08671	0.117638	-3.23061	0.26183	0.389734	-0.464956	-3.56973	2.76626	-4.08793	0.16327	-0.638678
Epithelial Cell;testosterone;trt_cp;10 uM;6 h	0.800728	0.208077	0.861853	-0.15759	0.575293	0.438132	0.300724	-0.411412	0.533872	0.516419	-0.511459	-0.944039	-0.410745	-0.114434	-0.439161	-2.1371	2.86615	0.430865	-2.28986	-0.00582242	3.68986	0.124367	2.84883	-0.326251	-0.0529862	-0.0557623	0.221602	3.01181	-0.482045	-0.464274	3.0834	-0.479969	-2.21248	3.34341	0.104677	-2.75995	-3.07846	-0.0697584	1.99613	-0.256123	-0.0007883	0.104347	-3.33074	0.508882	0.0903891
Epithelial Cell;Y-26763;trt_cp;10 uM;24 h	2.5635	-0.148064	2.47696	-2.49821	-1.99149	0.322898	0.0419851	-1.88361	0.0900412	2.61271	3.05214	-0.17084	3.53339	3.0703	0.488114	0.586575	2.70572	-2.75475	-3.00308	-3.11395	-0.0548968	-0.416396	-2.74296	-2.3636	-0.530526	2.41527	1.67619	2.70514	0.225116	0.130235	0.19903	0.14107	0.167987	0.2628	-0.518161	-0.699908	-0.10013	-3.06286	-2.14128	-0.370189	0.444189	-0.00860281	-2.78	-0.270992	3.26622
Epithelial Cell;BRD-K19826688;trt_cp;10 uM;6 h	-2.57715	-2.65386	-2.56165	2.03879	-2.85816	-2.46003	-2.13818	-0.28448	-0.456162	-2.8236	0.20938	0.0811339	0.433629	-0.577319	0.464052	3.02995	-1.06458	-0.403793	-3.79308	-0.693939	-0.52997	-3.63247	0.810655	-3.27826	-0.308963	0.36388	0.839898	3.16229	2.41554	2.66596	-0.198908	-2.35457	-2.69554	-2.61648	-2.57297	-3.32992	-3.84961	2.45681	0.852401	-0.280255	-2.43108	2.65402	-2.84414	0.152788	-0.125444
Epithelial Cell;yohimbine;trt_cp;10 uM;24 h	3.14715	0.201059	0.763634	-0.115309	0.353172	0.0250876	-0.141292	-0.228336	2.55261	2.76706	0.582578	-0.333913	0.768623	0.783895	0.54678	2.46598	2.9136	0.0813176	-0.576911	-0.330856	0.188893	-0.176446	-0.16329	-0.378457	2.09508	2.51889	-0.433198	-0.0814534	-0.17577	-1.91346	2.4406	-2.5133	-0.224849	-0.393251	-0.570071	-0.340474	0.105634	-2.38989	-2.3067	-0.536475	2.82094	-0.708944	-0.367789	-0.217598	0.507214
Neural Progenitor Cell;BRD-A41114263;trt_cp;10 uM;24 h	0.0914013	2.61375	-0.378752	0.339036	3.32544	-2.09579	0.686005	-0.391428	3.16997	0.153451	-0.0677158	-0.785878	0.250589	-0.0069227	2.58669	0.09217	0.58739	0.10818	3.21238	3.25685	1.51931	0.432347	1.02928	2.14092	2.5109	-2.39272	0.0337244	3.76558	0.45254	2.6713	-2.24552	-0.675491	0.352574	0.300059	0.771574	0.972028	0.688261	1.04096	4.13405	3.16967	-0.0956859	-0.311366	0.505126	0.679847	0.519749
Epithelial Cell;HDAC3-selective;trt_cp;10 uM;6 h	-2.81909	-2.86013	-3.19734	2.25034	-2.78487	-2.60349	-0.326432	-2.13967	-2.08859	-2.92496	-0.0376512	0.541845	-0.560547	-1.04967	-0.139074	0.375837	-1.5417	-0.876493	-3.3783	-0.603796	-3.83711	-4.12933	0.0569767	-3.63969	-0.468182	0.362024	0.834723	3.12628	2.51703	2.76398	-0.518859	0.10402	-0.122474	-2.97243	-0.0213599	-3.05906	-3.13722	2.82635	1.23164	2.35657	-0.226571	2.85513	-2.60255	0.476848	0.558818
Neural Progenitor Cell;GNF-2;trt_cp;10 uM;24 h	-2.54901	0.181873	-2.26237	-0.242678	-0.276273	-2.72153	0.00541182	-0.276797	-0.311604	-2.12992	0.525131	0.112831	-0.253606	-0.494062	0.166095	-0.158222	-0.310026	-0.0661887	0.383356	0.341888	0.952328	2.8791	0.443362	0.480525	-0.380477	0.194399	0.221345	1.03064	-0.401408	2.5929	-0.344728	0.252552	2.87423	-0.310124	0.576822	-0.0266534	-0.125514	-0.306744	-0.109183	2.62485	-3.05038	0.308156	0.0520955	-2.38491	0.664828
Epithelial Cell;ursolic-acid;trt_cp;70 uM;6 h	0.449873	0.33438	0.0583309	0.712334	0.848897	0.476286	2.63827	1.90084	2.63521	-0.170884	0.0082955	0.898681	0.669203	0.341061	0.586679	-0.0947551	0.721317	0.599547	2.81395	2.97937	0.104857	-2.39093	-2.70214	-0.525808	3.06942	2.26632	-0.182658	2.94134	0.423621	-0.426933	0.422138	-3.16762	0.217953	-0.080397	-0.182351	3.37486	3.12465	0.854228	-2.70986	0.559436	0.775013	-3.15841	0.283403	-0.0510463	0.551669
Epithelial Cell;PCI-34051;trt_cp;1.25 uM;6 h	-2.7145	-3.05993	-3.03111	2.21744	-2.82062	-2.715	-0.655093	-2.26352	-2.41579	-2.79115	-2.06059	0.0230403	-2.5387	-2.87094	0.469345	2.38939	-0.568969	-0.289823	-3.60841	-0.7375	-0.534471	-3.78709	0.584449	-3.3122	-0.763728	-0.356791	0.78957	1.80449	2.35559	2.58144	0.396267	-2.85709	-2.57695	-0.762086	-2.22991	-3.33322	-3.81924	2.36737	2.71928	-0.49712	-2.70358	2.90749	-2.94943	-0.139126	-2.27862
Epithelial Cell;PNU-74654;trt_cp;80 uM;6 h	2.67871	2.11747	2.45247	0.180712	0.380133	0.463079	0.0765742	-2.04483	2.23965	-2.06076	-0.352835	0.0217608	-0.00620489	-0.00989374	-0.0924781	-3.05361	0.537075	0.656541	0.0683667	-0.119062	0.37327	-2.88979	-3.49452	-0.720838	-0.176964	0.39985	0.107409	-0.39191	-0.324109	-0.155767	0.0286682	-1.48882	-0.135286	2.51489	-0.332425	3.36618	0.78631	0.279536	-2.85347	0.119309	0.211737	-3.18353	0.208499	-0.0788811	0.749749
Neural Progenitor Cell;UNC-0638;trt_cp;0.12 uM;24 h	-0.17412	0.0154309	-0.0906108	-0.229023	-2.00134	-0.596074	0.0138844	-0.279271	-0.670225	0.0373656	2.75855	0.160867	0.251535	2.62494	2.62334	-0.0524394	2.28455	0.580779	-0.0624326	2.32179	3.25389	3.36156	0.499171	2.55338	0.333523	-0.153434	-2.23727	0.298406	-0.585916	2.18218	-0.490396	-0.254105	2.8586	-0.141459	0.0876802	0.0342487	-0.260773	-0.294958	-0.0131907	2.5344	-2.98107	-2.04705	-2.00024	-2.60438	-0.228754
Embryonic Stem Cell;motesanib;trt_cp;0.12 uM;24 h	-0.0319987	0.368342	0.0468143	0.258943	0.513731	-0.259836	0.0617311	0.280714	0.433986	0.120701	-0.0379833	-3.40584	-3.57117	-3.25987	-0.0628114	-2.69342	-0.0955485	-0.507307	-0.374133	-0.671642	-0.0892236	0.270098	-3.32729	-1.11185	-2.66613	-0.117719	0.398144	2.48541	-0.448054	0.600973	-2.10463	0.875678	-2.75733	-0.200172	-2.38099	3.063	3.00956	-2.7279	2.48257	-0.122073	-3.86657	1.07407	-2.65663	-2.63483	0.278027
Neural Progenitor Cell;GDC-0879;trt_cp;0.12 uM;24 h	-2.26931	-0.0615187	-0.0434222	-2.31459	-2.65367	-2.34329	-2.16371	-0.881775	-2.3713	-0.211065	0.238514	-0.262585	-0.257592	0.0638929	0.227835	-0.129962	2.20613	0.225583	2.46577	2.51115	3.33142	3.28816	0.580465	2.79046	0.265548	0.147128	-0.197046	0.481857	-0.483622	2.54767	-0.507942	0.349757	3.17985	0.0397064	2.21601	0.176868	-0.469924	-2.30863	-0.130108	2.36553	-2.64766	2.3902	-0.0878554	-2.27389	-0.264197
Neural Progenitor Cell;KU-55933;trt_cp;0.12 uM;24 h	1.87386	2.34226	2.43264	2.3367	0.0881537	0.370167	-0.200357	-0.462002	0.101976	2.02826	0.572547	-0.0881568	0.360276	2.89393	2.34757	-0.0912808	2.76836	0.502485	2.81322	0.510672	3.72709	3.69942	2.74114	3.02747	-1.78079	0.236949	-2.55181	0.305609	-0.881228	-0.204045	-0.590406	-0.128369	3.17275	0.476175	2.36552	0.330427	-0.172773	-2.5376	-0.332275	-0.0200352	-2.38061	-0.0155116	-0.220291	-2.4521	-0.231524
Neural Progenitor Cell;ponatinib;trt_cp;0.12 uM;24 h	-2.42915	2.13935	-0.421316	0.130797	0.0569705	-2.4992	0.196173	-2.2584	-0.0447786	-1.93188	-0.00490596	0.125662	-1.04824	-0.79472	-0.409864	-0.279096	-0.650093	-0.143827	-0.494779	-0.491366	0.433556	0.0217719	0.610644	-0.426061	-2.1027	-0.537885	-0.13146	1.27649	-0.69455	2.87921	-2.56043	0.1153	1.01721	-2.57224	2.45849	-0.19673	-0.479602	2.77215	0.452165	2.68039	-2.7959	0.334455	-3.45339	0.0972482	0.78522
Embryonic Stem Cell;KIN001-244;trt_cp;0.12 uM;24 h	0.0281045	0.2711	0.108489	0.228697	0.47193	0.0335246	0.0488276	0.221567	0.347598	0.166631	-0.0133913	-0.950415	-3.58136	-3.14351	0.0232204	-2.79519	-0.00590044	-2.5876	-2.42269	-0.80159	-0.0737326	0.0823191	-3.3047	-2.81256	-2.57916	-0.138964	0.185607	0.0202037	-0.451158	0.514347	-2.19748	0.785556	-2.63733	-0.123751	-2.53495	2.84388	2.82061	-2.74667	2.48135	-0.0928236	-3.97957	0.771366	-2.75228	-2.75509	-0.0419534
Neural Progenitor Cell;chelerythrine;trt_cp;0.12 uM;24 h	0.154028	2.18837	0.166914	0.310073	0.327411	1.91592	2.26911	-1.76672	1.90806	1.95143	-0.0918449	0.723251	-0.058453	-0.0129024	0.288444	0.294302	-0.67355	-0.504326	0.294223	0.217963	0.948858	0.166408	0.654796	0.423272	-0.256754	0.00359722	-0.502908	1.13142	-0.683422	0.904361	-0.493515	0.472369	1.63054	-0.393838	1.36921	0.547725	-0.180732	0.481156	-0.156352	0.95298	0.728112	0.628334	0.239232	0.76828	1.14372
Neural Progenitor Cell;BMS-777607;trt_cp;0.12 uM;24 h	-0.268005	-0.0941893	-0.313858	-2.42363	-0.504394	-0.215278	-0.292667	-2.19762	-0.420606	-0.298291	2.53585	0.0608773	-0.449056	-2.67803	0.2597	0.464462	-0.0465575	-0.390682	-2.17418	-0.191956	0.549557	2.60094	0.212871	2.09107	0.0633905	-0.446061	-0.255883	0.614247	-0.49399	2.34557	-0.283632	0.166268	0.230511	-2.21535	-0.108961	-0.333495	-0.438046	-2.68921	-0.520768	0.386496	-3.8092	-0.323142	-2.35845	-3.09403	-2.31762
Neural Progenitor Cell;KIN001-260;trt_cp;0.12 uM;24 h	-2.85797	-2.13752	-2.37585	-0.434222	-2.92847	-2.66139	-0.721308	-0.583828	-2.77496	-2.24938	0.296792	-0.0558705	-0.110421	0.0829557	2.48098	-0.245724	0.524862	0.270704	0.0700091	2.59842	0.746382	3.63536	-0.0431	2.67255	0.142098	0.0244752	-2.32484	-0.416991	-0.618377	2.33233	-0.524469	0.258411	2.86187	-0.565657	-0.179165	-2.85564	-3.09449	-0.608361	-0.368786	-0.256583	-3.22397	-2.16891	-0.30766	-2.82744	-0.144016
Neural Progenitor Cell;MLN-0128;trt_cp;0.12 uM;24 h	3.2872	3.06187	3.13126	2.33565	3.07845	2.60224	3.1425	0.181923	3.30685	2.96587	2.48873	0.69522	0.259653	0.239926	0.698564	2.34735	2.55046	-0.26932	1.95725	2.80026	0.778009	2.45913	0.559209	0.6573	0.665931	-0.222156	-0.384496	0.822047	-0.52395	0.612873	-0.0848028	-0.0185231	0.353488	-0.263597	0.734085	-0.107062	-0.0661915	0.387907	-0.79183	2.64924	-0.637575	-0.522363	-0.309608	-0.503524	0.617669
Neural Progenitor Cell;A-769662;trt_cp;0.12 uM;24 h	-0.563976	2.27147	0.572126	2.22852	1.90619	-2.13363	-0.27937	-2.39289	0.116211	1.81309	2.09096	0.524245	0.25019	0.347343	0.576115	0.217601	1.9536	0.0378167	2.5216	2.31482	3.53087	3.30075	1.0429	2.7625	0.475965	-1.69889	-2.43591	0.93543	-0.340877	2.46388	-0.693871	0.119392	3.59037	-0.24077	2.74356	0.0301101	-0.609781	0.248678	-0.0367993	2.07244	-2.49947	0.00803661	-2.48559	0.462796	0.602678
Neural Progenitor Cell;SGX-523;trt_cp;0.12 uM;24 h	-2.18266	0.348367	-0.108327	-2.20111	-0.419088	-2.27473	-0.440095	-0.760341	-0.429272	0.00092547	2.41188	-0.0537104	-0.00222529	0.072642	0.323299	0.12717	2.40373	0.0385573	2.49187	2.57742	3.18227	3.40376	0.523482	2.80609	0.457471	-1.42037e-05	-0.497484	0.467152	-0.49229	2.35565	-0.218885	0.203301	3.21775	-0.0551448	2.2585	0.0247004	-0.170511	-2.42957	-0.333718	2.30402	-2.88994	0.38457	0.10752	-2.55991	2.40547
Neural Progenitor Cell;AZ-20;trt_cp;0.12 uM;24 h	-0.144518	2.50947	1.82265	-0.0831158	0.187074	-2.16891	-0.131759	-0.758979	0.179785	1.87482	3.15486	0.709198	-0.111122	0.017485	0.390201	0.222426	0.0695885	0.127869	2.3463	2.18695	0.726249	0.932656	0.547524	0.663474	1.84328	-0.20434	-0.340635	0.532855	-0.361682	2.80257	-0.198143	-0.311993	3.00456	-0.494716	2.01511	-0.317571	-0.464091	2.24662	-0.332683	0.206979	-3.13275	0.0940386	-0.497812	-2.49187	2.27413
Neural Progenitor Cell;XMD-892;trt_cp;0.12 uM;24 h	-0.0825127	2.63359	2.0594	2.17258	0.595011	-1.92682	0.113381	-0.75298	1.53338	2.02905	2.71396	0.745832	0.358887	2.68184	2.89583	-0.113451	0.0720584	0.188276	2.57177	2.35595	3.32943	3.1888	0.795195	2.65307	0.282347	-0.269569	-2.63987	0.852503	-0.447644	2.56823	-0.467709	-0.241322	3.20708	-0.210377	2.54437	-0.150739	-0.519178	2.06232	-0.0137644	2.34721	-2.24941	-0.314717	-2.34175	0.0783161	2.66144
Neural Progenitor Cell;CGK-733;trt_cp;0.12 uM;24 h	-2.23436	-0.222685	-1.93191	-0.563101	-2.70405	-0.388358	-0.555458	-0.509476	-2.26877	0.125359	2.92643	0.374476	-0.18085	0.0903414	0.330516	0.0383453	0.0886146	0.078954	-0.258829	-0.0589241	0.514828	2.61908	0.126721	0.218501	0.247684	-0.183042	-0.526935	0.282594	-0.349474	2.44883	-0.178112	0.0233533	2.5911	-2.53744	-0.157223	-0.414974	-0.529195	-2.13651	-2.34457	-0.0675597	-3.07406	0.185248	-2.48025	-2.39756	-0.047175
Neural Progenitor Cell;CTB;trt_cp;0.12 uM;24 h	-0.0537522	0.276433	2.10743	-0.24478	-2.19522	-2.05642	-0.326248	-0.0291228	-1.89556	2.11451	0.6546	0.147611	2.36054	2.63469	2.37516	0.0186121	2.76284	0.460019	0.460457	2.74675	3.48977	3.63034	2.81033	3.05527	0.00262683	-0.0733446	-2.64135	0.3463	-0.606157	2.48415	-0.693517	-0.454334	3.27822	0.157663	1.94463	-0.120633	-0.52791	-2.59585	-0.363932	0.374686	-2.98603	-0.138651	-0.0717838	-2.74611	0.000501962
Neural Progenitor Cell;BX-795;trt_cp;0.12 uM;24 h	-0.778903	0.156624	1.801	-0.156629	-2.42363	-2.02074	-0.42817	-0.520524	-2.11665	-1.55409	0.304336	0.399535	-0.253227	2.53422	2.46242	-0.263913	2.17365	0.486422	0.109581	2.45262	3.43705	3.67774	0.490192	2.84971	-0.0136779	-0.174213	-2.50122	0.0859753	-0.490081	2.4308	-0.542274	-0.235831	3.3093	0.0215457	0.193169	-0.191659	-3.15521	-0.659865	-0.380466	0.176807	-2.94492	-2.32124	-0.248978	-2.67495	-0.0286169
Neural Progenitor Cell;QL-XI-92;trt_cp;0.12 uM;24 h	0.180141	2.36651	0.30733	0.119771	-0.333593	-0.0573811	-0.13502	-0.473929	-0.189485	0.240026	2.61156	0.0246219	-0.0607045	0.072466	0.45291	0.17393	0.37725	-0.0520151	2.5819	2.42807	1.05927	3.11055	0.370995	2.95719	0.432073	-0.125269	-2.40818	0.65984	-0.523901	2.31153	-0.247962	0.272793	3.02181	0.0439325	2.59336	0.304709	-0.243231	-2.51841	-0.124938	2.22673	-2.2791	0.502129	2.10208	0.157989	2.38359
Neural Progenitor Cell;azacitidine;trt_cp;0.12 uM;24 h	-0.328824	2.45806	0.590023	2.36406	0.875289	-1.94756	2.04598	-0.848336	1.68829	1.97033	2.4181	0.21549	0.0207366	0.157573	2.8467	-2.1573	0.417987	-0.0926775	2.49444	2.75646	1.24564	2.88407	0.89073	0.694602	2.23277	-0.514049	-2.26772	0.877508	-0.74735	2.63121	-0.798011	0.152721	2.81131	0.215947	2.82555	0.501398	-0.372599	0.352018	0.0182325	2.60937	-2.63888	-0.175639	-0.117612	-0.0708023	0.57806
Neural Progenitor Cell;IOX2;trt_cp;0.12 uM;24 h	0.137663	0.277878	0.230033	-0.0297082	0.0934575	-0.234272	0.0531779	-0.436558	-0.189002	0.455198	2.30262	-0.300821	-0.134475	-0.017619	-0.0160138	-2.13588	0.475147	0.10255	2.518	2.50369	1.11206	3.23227	0.401868	2.67243	-0.430991	-0.250997	-0.481335	0.882398	-0.64449	2.37776	-0.390172	0.0851495	3.07787	0.233518	2.44695	0.218262	-0.312952	-0.108195	-0.202576	2.59209	-0.374392	2.37639	-2.12747	0.13801	2.89348
Neural Progenitor Cell;PF-573228;trt_cp;0.12 uM;24 h	-0.565188	2.5719	2.05901	0.135987	0.143762	-2.2559	-0.136275	-0.635934	-1.7038	1.54578	2.52572	0.567782	0.33166	2.69704	2.52243	0.15938	2.16996	0.373539	2.5766	2.55099	3.33342	3.58723	0.539778	2.71129	0.456085	-0.5628	-2.3355	0.349644	-0.650745	2.65572	-0.449267	-0.122403	3.44424	0.0732219	2.36932	-0.267979	-0.604224	-0.296357	0.0136455	-0.122224	-2.78197	-2.46633	-2.31755	-2.19396	2.52703
Neural Progenitor Cell;AGK-2;trt_cp;0.12 uM;24 h	0.138418	0.402118	0.223219	0.461762	0.605605	0.0550309	2.3655	-1.98555	0.349089	0.38295	0.045917	0.240087	-0.264728	-0.220199	0.307019	-0.212476	-0.326819	-0.375529	0.256161	0.128128	0.996386	0.40318	0.660635	0.189346	-0.318647	-0.430975	-0.337061	1.12034	-0.320715	2.84627	-0.785879	0.487432	2.90594	-0.509697	0.911011	0.488871	-0.481642	0.532343	0.371768	0.818299	0.0273262	0.430311	-0.277241	0.532322	0.808511
Embryonic Stem Cell;AT-7867;trt_cp;0.12 uM;24 h	-0.135135	0.29385	-0.000733856	0.249298	0.4948	-0.14653	0.0195209	2.11444	0.377693	0.075158	-0.28749	-1.15749	-3.6189	-3.5689	-0.372737	-2.90116	-0.318193	-0.415897	-0.686869	-0.917744	-0.27238	0.00892832	-3.29921	-0.901568	-2.70528	-0.0657848	0.636064	0.415405	-2.23688	0.624953	0.128767	1.08212	-2.8243	-0.145835	-2.4425	2.94729	3.09156	-2.71732	2.75305	-2.39377	-3.71058	1.34016	-3.0074	-2.51717	0.0841381
Embryonic Stem Cell;dacomitinib;trt_cp;0.12 uM;24 h	2.22026	0.649532	2.30884	2.39334	2.78848	2.38381	0.387811	0.394383	2.38379	2.22103	2.43187	-3.09487	-3.18461	-2.72065	2.52103	-0.624611	2.44997	0.0179241	-2.10084	-0.395025	-2.41244	0.496309	-2.99515	-2.83187	-0.201999	-0.0134204	0.123706	-0.0296827	-2.29505	0.438041	0.0822644	0.60497	-2.72787	-0.199852	-2.52128	0.50699	2.95146	-2.44307	2.44991	0.000637606	-4.26549	-0.296851	-3.00531	-2.98322	-0.303421
Neural Progenitor Cell;VE-822;trt_cp;0.12 uM;6 h	-2.68388	-0.487194	-2.39291	-0.168682	-3.16423	-0.306529	-0.849307	2.59814	-2.59039	-0.189023	0.613343	3.65658	0.0856562	-0.0746667	0.775685	3.14071	-3.64273	-0.396443	-2.63401	-0.546917	-0.620201	-2.50055	-0.700126	-0.174957	0.325085	0.547909	0.119602	0.107219	0.57559	0.445161	0.232956	1.11969	3.13278	-4.29215	0.196339	-0.215178	2.79723	-3.04093	-1.00288	0.718684	-2.76855	-0.222581	3.00875	-0.604605	0.614546
Neural Progenitor Cell;entinostat;trt_cp;0.12 uM;24 h	2.69421	3.25217	2.92687	3.31631	2.95654	1.82163	2.82236	0.036073	2.85199	2.33756	2.8206	0.54155	0.455909	2.86891	3.09999	0.18095	2.43697	-0.110365	3.10185	3.22107	3.743	3.32254	0.669388	2.99468	1.9703	0.0171817	-2.63858	0.710808	-0.423628	0.570622	-0.269483	-0.127829	3.49594	0.321612	2.16156	-0.151139	-0.698439	-3.20506	-0.297256	0.343843	-2.81285	-2.48987	-2.12992	-2.83717	0.434158
Neural Progenitor Cell;everolimus;trt_cp;0.12 uM;24 h	3.52248	3.57159	3.66059	3.00158	3.7299	2.93383	3.39725	0.159123	3.29642	3.46512	0.392902	1.19087	2.8508	2.89781	2.73794	0.0545905	3.1541	0.0604749	2.98184	2.82599	3.87796	3.00141	0.887972	3.11391	0.392292	-0.493885	-2.72716	1.0124	-0.610555	2.85763	-0.679584	-0.153596	0.85231	0.799708	0.667809	0.246485	-0.141208	0.572034	-0.671835	0.839413	-0.362404	-2.76583	-0.242733	-0.0231389	0.43303
Epithelial Cell;fdcyd;trt_cp;0.25 uM;24 h	-3.15618	-0.76922	-3.23744	0.124268	-2.63433	-2.80539	-0.389208	-0.00447356	-2.63999	-3.20609	-0.19337	-2.91728	-1.17776	-1.32086	-0.270498	-2.17104	-3.34218	-2.58874	-0.961009	-0.817985	-4.50175	-1.5038	-2.52744	-3.36424	0.531616	-0.083478	0.588487	-2.35994	0.243224	0.83407	2.31883	1.37222	-0.610077	-3.40401	2.8272	-2.61584	-0.170839	0.320095	0.253001	-0.18347	2.73157	0.567301	-2.10318	3.0363	-2.20637
Epithelial Cell;DU-728;trt_cp;0.25 uM;24 h	-0.457828	0.236855	-0.524861	0.759857	-0.157163	0.240292	0.283495	0.421572	-0.271504	-2.65122	0.314085	-3.02079	-0.143233	-0.794996	2.87823	3.15921	-0.985992	-0.263638	2.59629	0.104213	0.0241151	0.512905	3.78115	-2.50878	2.02975	0.418039	0.545657	0.553647	0.17941	2.54636	2.70419	0.801927	2.68607	-3.41341	2.47983	-0.0409132	-0.380223	0.251996	-0.355027	0.468956	2.94503	-0.307435	2.0605	0.462562	-3.13324
Neural Progenitor Cell;KIN001-260;trt_cp;0.37 uM;24 h	-0.905107	2.00479	-1.79625	0.0326877	-2.55474	-2.36485	-0.164044	-0.191559	-2.22213	-0.31194	2.63579	-0.0236295	0.231743	0.223884	0.347089	2.34952	-0.00323852	-0.0245908	0.241845	2.54483	0.924526	3.42222	0.0644717	2.48011	0.125069	0.141689	-0.533588	0.151602	-0.565246	2.44364	-0.394286	0.215282	2.95412	-2.76382	2.4894	0.0680252	-0.383377	-2.57027	-0.257929	2.32839	-2.47056	-0.120134	2.2254	-2.68476	2.73981
Neural Progenitor Cell;I-BET-762;trt_cp;0.37 uM;24 h	-2.1172	-0.157941	-1.79047	-0.578076	-2.59258	-2.26384	-0.323905	-0.727597	-2.47823	-1.78416	2.68294	0.671239	-0.226399	-0.239796	2.23782	0.109921	-2.13091	0.465678	0.273544	2.36938	-0.137966	2.67581	-2.78284	2.23837	0.427812	-0.15808	0.0760265	-2.35978	-0.472228	2.68525	-0.607594	-0.103268	2.55232	-2.43089	-0.120264	0.145841	0.122039	0.104662	-0.97832	2.35244	-3.68753	-0.105779	-0.104979	-2.87713	2.31024
Neural Progenitor Cell;KU-55933;trt_cp;0.37 uM;24 h	-0.261631	0.192964	-0.314425	-0.189994	-0.0257404	-0.178535	-0.123452	-0.593301	-0.0792077	0.211648	-0.177793	-0.255082	-0.755921	-0.63606	-0.406091	-2.51779	-0.336107	0.00693881	0.0466002	-0.298609	0.722262	0.404942	0.14749	0.22303	-0.405287	-0.163274	-0.0760091	0.983029	-0.939055	2.35714	-0.48795	0.505781	2.73984	0.0889321	1.01594	0.514845	0.0541612	0.168688	-0.269619	2.61176	-0.0217497	0.761606	-0.0714933	0.0651798	2.869
Neural Progenitor Cell;RAF-265;trt_cp;0.37 uM;24 h	-3.00888	-2.52642	-2.50861	-0.413139	-2.35568	-2.69742	-0.526373	-0.309447	-2.65012	-2.59467	0.518403	0.388734	-0.0988068	-0.115352	0.255447	2.1857	2.01644	0.0893656	-0.107971	2.82589	0.600686	0.481473	-0.2599	0.50096	1.84794	-0.319835	-0.275576	0.146956	-0.391917	2.92525	-0.200834	-0.264705	3.04998	0.0215807	-0.298054	0.194382	-0.187818	-2.98285	-0.330734	3.00014	-3.02673	0.854237	0.0802977	-2.61802	2.6528
Neural Progenitor Cell;KIN001-266;trt_cp;0.37 uM;24 h	0.550465	0.948545	0.625157	0.333274	0.866343	-0.0411852	0.627953	-2.47361	0.636006	0.506562	-0.263235	0.188944	-0.0352913	-2.54059	0.0824909	0.371949	0.422157	-0.298139	0.662307	2.43019	1.08753	0.610296	0.806952	0.964059	0.0216471	-0.428384	-0.154358	1.0884	-0.459348	3.04032	-0.824699	0.180419	1.01141	0.266365	-0.0832159	0.129783	-0.4325	0.117614	-0.350375	2.62348	-3.43268	0.0965773	-2.49159	-0.211909	0.329028
Neural Progenitor Cell;ALW-II-38-3;trt_cp;0.37 uM;24 h	-2.13747	2.02198	0.16201	-0.105066	-0.450144	-2.06302	-0.190971	-1.97013	-0.225472	0.230648	2.62667	0.474776	-0.00969701	0.0993839	2.95225	-1.80473	-0.033459	-0.0927382	-0.0987493	2.27708	0.827339	2.88948	0.237432	2.47592	0.531167	-0.231232	-0.477366	0.554901	-0.438396	2.41893	-0.326296	0.270591	2.83541	-0.158323	2.30852	-0.11017	-0.486951	-0.11465	-0.350208	2.00495	-2.66385	0.183177	-0.0789568	-0.108443	2.74406
Neural Progenitor Cell;Y-27632;trt_cp;0.37 uM;24 h	-2.15658	0.0543629	-0.182157	-2.28334	-2.39268	-2.2601	-2.15229	-2.42798	-2.26035	-0.0396141	0.163698	-0.124484	-0.212079	0.0918582	-0.0532715	-0.324173	0.0433606	0.257468	0.0189563	-2.22033	0.653282	2.93822	0.0114425	0.350209	0.00430363	-0.240617	-0.307242	0.309983	-0.480694	2.45586	-0.565199	0.630133	2.58736	-0.178127	0.161424	0.505158	0.00654053	2.33041	0.0679155	0.00628626	-3.15903	0.571171	-2.48285	-2.32024	-0.0143043
Neural Progenitor Cell;CGK-733;trt_cp;0.37 uM;24 h	-0.421041	0.650992	0.468107	0.315706	0.318467	-2.10099	1.97303	-2.5046	0.00781437	0.476949	2.72664	-0.00249445	0.0586823	0.276201	0.223388	0.0727873	0.362916	0.148085	2.40006	0.0284863	1.15327	2.83675	0.640104	0.602998	-2.03537	-0.332848	-0.562447	0.760094	-0.403305	2.41559	-0.6222	0.128841	3.07353	0.0667743	0.133083	-0.0771538	-0.652324	0.363687	0.404084	-0.0573412	-2.89887	0.13258	-2.6368	0.013845	2.27869
Neural Progenitor Cell;TAK-715;trt_cp;0.37 uM;24 h	-0.571427	2.2391	1.87073	2.28211	0.000403663	-2.07174	-0.343365	-0.680836	-2.08037	2.027	0.0666089	0.112567	0.12953	2.46051	2.27931	-0.268319	2.32241	0.450601	0.241467	0.271605	3.29011	3.4215	0.349171	2.86748	0.244887	-0.325025	-2.33948	0.220609	-0.615065	0.11111	-0.777832	0.17466	3.40788	-0.0508009	2.57825	0.295525	-0.352797	-0.303492	-0.00119476	2.74884	-2.60323	-1.98003	-0.246516	-2.11295	2.81308
Neural Progenitor Cell;KIN001-270;trt_cp;0.37 uM;24 h	0.215388	0.428181	0.277886	0.143845	0.137924	-0.393745	0.158797	-2.26244	0.0534309	0.0172843	-2.46746	-0.266612	-0.382079	-2.72579	-0.48977	0.055144	0.0692497	-0.0754551	0.0892388	-0.0323886	0.782695	0.875466	0.206792	0.591389	-2.46026	-0.341986	0.0525714	0.468013	-0.553835	2.93894	-0.338682	0.725952	0.786921	-0.0197824	-0.380588	-0.623912	-0.547926	0.0202859	0.0436261	2.54542	-3.79967	0.163297	-2.57078	-2.63464	0.226067
Neural Progenitor Cell;XMD-885;trt_cp;0.37 uM;24 h	2.52183	2.66553	1.13902	0.486759	1.22121	0.424644	1.01289	0.301133	1.20934	1.14283	-0.113047	0.372217	0.0229382	-0.234582	0.177395	-0.205575	0.121469	-0.418162	0.411617	2.33515	1.05858	0.0168807	0.395969	0.964413	0.176964	-0.371041	-0.313179	1.13008	-0.742597	2.61204	-0.959852	0.120651	1.02054	0.93097	0.779315	0.316082	-0.322944	0.0321596	-0.193957	0.664183	-0.325288	0.0940617	0.167136	0.137643	0.966684
Neural Progenitor Cell;GSK-2334470;trt_cp;0.37 uM;24 h	0.0185067	2.63454	2.37332	2.32125	0.781206	0.129381	2.51106	-1.99261	0.691294	0.672349	2.5693	0.452174	0.417094	2.98636	2.5973	0.0808012	2.43852	0.507199	3.06162	2.52187	3.80191	3.40042	0.659314	2.81225	-0.504299	-0.438935	-2.29712	0.353193	-0.360661	2.65626	-0.533578	-0.15027	3.19164	0.130734	0.359706	-0.299288	-0.297247	-2.16115	-0.0698239	-0.0110586	-2.75634	-0.408312	-0.0888856	-0.00202582	2.20438
Neural Progenitor Cell;BX-795;trt_cp;0.37 uM;24 h	-0.582381	2.1933	1.72311	-0.163721	0.0148242	-2.14672	-0.451941	-0.520097	-1.92438	1.96447	0.372726	0.283354	0.159529	2.47078	2.31003	-0.553295	2.52326	0.599152	2.46962	0.343936	3.31217	3.42645	0.177397	2.49676	0.479026	-0.246515	-2.45228	0.338703	-0.711423	0.225655	-0.453517	-0.261202	3.19115	0.26864	2.15851	0.399377	0.256791	-0.339635	-0.143668	2.52632	-2.86328	-0.0588811	0.0396264	-2.3375	2.69714
Neural Progenitor Cell;BI-2536;trt_cp;0.37 uM;24 h	-2.01401	2.04083	0.151865	-2.2282	-1.94082	-2.09858	-0.431179	-0.951226	0.0333839	1.64697	2.54773	0.658575	-0.245577	-0.13819	2.89419	1.81399	0.00362947	-0.107303	0.157555	-0.18779	0.948138	2.6553	0.712952	0.499645	0.538631	-0.174792	-0.550966	0.908648	-0.655224	1.024	-0.181101	0.100968	3.0251	-0.335344	2.51671	-0.174834	-0.674832	0.319175	0.142984	0.322845	-2.49086	0.182079	-2.40689	0.119999	2.44093
Neural Progenitor Cell;BAY-61-3606;trt_cp;0.37 uM;24 h	-0.963175	-0.405039	-0.56808	-0.529881	-2.93267	-0.495128	-0.915922	-0.219756	-2.48802	-0.298853	0.28839	0.347607	2.47591	2.62761	2.50804	-0.209761	2.35316	0.206323	-0.138255	0.275118	2.80252	3.07403	-2.46136	2.44772	0.173058	0.0539306	-2.32203	-0.44742	-0.625537	-0.129612	-0.574839	-0.104485	3.03697	0.105426	2.00008	-0.08452	-0.35132	-2.48978	-0.441008	0.433633	-2.9946	-0.497469	0.184437	-2.64742	0.408486
Embryonic Stem Cell;MLN-0128;trt_cp;0.37 uM;24 h	-0.522587	-0.119352	-0.418076	-0.690256	-0.366002	-0.452448	-0.511948	-2.48409	-0.193095	-0.302662	-2.97015	-3.72	-4.06366	-3.73784	-3.28812	-2.90766	-0.888549	-2.90594	-0.775256	-3.65403	-3.7159	-0.654726	-3.87601	-2.87453	-1.01433	0.475666	2.84091	0.179084	-2.70791	2.82706	0.467357	1.58478	-3.15747	-0.481763	0.640492	3.33179	3.85637	-0.165692	0.283658	2.61552	-0.859671	3.6211	-2.63964	0.427136	2.53991
Endothelial Cell;JQ-1-R;trt_cp;0.37 uM;24 h	0.780402	3.24437	0.608249	3.0539	0.729321	0.898992	3.33739	3.00797	0.519611	0.749699	0.218556	3.28936	0.453713	0.130158	2.37844	0.469969	-0.209973	-2.81164	-0.233711	0.240839	0.651167	-0.359644	3.12979	-0.538691	2.70035	0.186945	-0.293463	2.99913	0.337238	0.780783	2.51814	-2.42139	2.85741	-1.65088	2.49649	0.511742	0.56888	0.15351	2.30812	3.29875	-2.35027	0.377007	0.309447	-0.119962	2.92542
Neural Progenitor Cell;KIN001-055;trt_cp;0.37 uM;24 h	-0.250522	-0.0962937	-0.0030405	-0.222685	-0.563993	-0.238799	-0.171978	-2.17673	-0.487688	-0.136944	0.338614	0.330261	-0.0110338	0.00625874	0.240632	0.0587112	-0.332599	-0.0848966	-0.0346554	-2.5005	0.889449	0.346889	0.374558	0.125384	-2.09081	-0.227365	-0.202413	0.87611	-0.326759	2.60827	-0.365782	0.450606	3.00726	-0.50104	0.430352	-0.321381	-0.176136	0.153522	-0.267473	2.28383	-0.769459	0.48156	-0.260196	0.545132	2.91775
Neural Progenitor Cell;BIX-01294;trt_cp;0.37 uM;24 h	0.285169	2.92293	2.39601	2.41482	2.19895	-0.367729	0.594164	-0.285908	0.104306	0.232377	2.4645	-0.0108866	0.560673	2.91993	0.529202	-2.05785	0.0605294	0.357695	2.65358	2.5194	3.41561	3.43511	0.897401	0.867721	-0.0208934	0.0401043	-2.5129	0.558887	-0.359981	2.63841	-0.42078	0.443059	3.34947	-0.254308	2.76181	0.495909	-0.498614	2.20107	0.312095	2.80803	-2.41495	-2.1074	-1.9883	0.400244	2.18336
Neural Progenitor Cell;olaparib;trt_cp;0.37 uM;24 h	-2.77993	-2.33784	-2.45108	-2.70673	-3.14773	-2.58538	-2.51774	-0.324458	-2.69677	-2.12091	2.75175	0.344759	-0.21918	-0.14907	0.0661996	0.101276	-0.225274	-0.052161	-2.27969	-0.259358	0.229906	0.264612	-0.342289	0.328931	0.636157	-0.0133933	-0.252184	0.168485	-0.503965	2.53157	-0.531212	0.502396	2.84031	-2.81972	0.358501	-0.211725	-0.169784	-0.115462	-0.849324	1.84662	-2.69127	0.210922	0.130112	-0.182443	2.83255
Neural Progenitor Cell;MK-1775;trt_cp;0.37 uM;24 h	-0.785342	-0.445778	-0.776966	-0.148972	-0.11113	-0.757032	-0.201261	0.474998	-0.284974	-0.32873	-0.173887	-0.37502	-0.247846	-0.491993	-0.148043	-0.0383183	-0.426287	-0.464812	0.189389	-0.022409	0.724602	0.257093	0.111863	0.0145952	-0.29093	0.30015	0.42567	0.968401	-0.414317	0.85969	-0.55884	0.57558	1.16997	0.264068	0.959799	1.00281	0.295334	0.080148	0.224675	0.620817	0.928619	1.59363	1.30521	0.807759	1.32146
Neural Progenitor Cell;CTB;trt_cp;0.37 uM;24 h	0.329377	2.51655	2.51534	-0.281026	0.52468	-0.198825	-0.0831649	-0.297627	0.298804	2.41263	0.751535	0.310742	0.365946	2.63202	2.61367	-0.165514	2.63437	0.372334	0.332615	2.60322	3.1582	3.34853	0.466248	2.74751	0.28587	-0.243623	-2.59041	0.208297	-0.593746	2.3093	-0.368925	-0.32316	2.90564	0.326176	-0.0314249	0.303895	-0.462243	-2.4141	-0.293882	0.464886	-3.02851	-2.00822	-2.60248	-2.88787	0.0763097
Neural Progenitor Cell;TPCA-1;trt_cp;0.37 uM;24 h	2.60789	2.56748	2.66162	0.535845	3.0757	0.499978	2.63875	0.120906	2.80685	1.16181	-2.16253	0.0541834	0.00456941	-2.26509	0.10286	-0.0914503	0.526881	-0.270922	2.52784	2.61256	1.431	2.83038	0.703728	2.61305	0.366494	-0.249141	-0.141627	1.25636	-0.602229	2.90944	-0.80801	0.0628848	0.711903	0.714613	0.267769	0.39325	-0.0869815	0.00543293	-0.0719285	2.69144	-0.670615	-0.0791408	-0.109434	-0.19453	0.405516
Neural Progenitor Cell;QL-XI-92;trt_cp;0.37 uM;24 h	2.35654	3.02015	2.42927	2.72594	1.01537	0.464967	2.4744	-0.459681	0.951451	2.23499	2.43754	0.29503	0.373914	2.43333	2.60169	1.92867	2.52904	0.00184039	3.05129	2.81423	3.499	3.31937	0.93794	3.27181	-0.238795	-0.144726	-2.20516	0.676093	-0.480311	0.598064	-0.291653	-0.00703135	3.17562	0.263703	2.64286	0.0771592	-0.482079	-2.56327	-0.249727	0.423027	-0.176652	-0.0416432	2.19119	-0.412524	2.47976
Embryonic Stem Cell;amuvatinib;trt_cp;0.37 uM;24 h	-0.105339	0.254067	0.0532145	0.17096	0.480421	-0.190627	-0.0275305	0.227529	0.313255	-0.0340266	0.11943	-3.44967	-3.48043	-3.12285	-0.0693541	-2.71665	-0.0105818	0.136754	-2.63717	-0.63957	-0.164766	0.361632	-3.246	-2.60973	-2.61931	-0.0714059	0.258289	-0.0304586	-0.453442	0.489162	-2.16395	0.84312	-2.75032	-0.211906	-2.33777	2.88885	0.479165	-2.76376	2.45545	-0.136869	-3.93914	1.04593	-2.79213	-2.69167	-0.109308
Embryonic Stem Cell;SB-525334;trt_cp;0.37 uM;24 h	0.252032	0.652943	0.357407	2.50212	0.687362	0.0989813	0.266642	0.271118	0.560774	0.297245	0.14213	-3.32773	-3.44955	-3.1171	2.44267	-2.70001	0.110001	-2.2973	-0.00662355	-0.526058	0.0100285	0.348328	-3.1631	-2.5454	-0.131285	-0.179213	0.190022	2.41886	-2.29756	0.579196	-0.104055	0.713464	-2.47248	-0.0187442	-2.25759	3.00168	2.97456	-2.81439	2.73713	0.0426857	-4.04293	0.747559	-2.45626	-2.8653	0.0946103
Embryonic Stem Cell;pazopanib;trt_cp;0.37 uM;24 h	0.21244	0.550865	0.362202	0.376336	2.89739	0.192619	0.164195	0.140881	0.585316	0.318776	2.40473	-3.25881	-3.50792	-3.03587	0.100788	-2.7389	0.0509403	0.161284	-0.183087	-0.482343	0.0687206	0.351435	-2.95426	-2.73136	-0.12061	-0.187954	0.322364	2.44423	-2.27792	0.579566	-0.0937987	0.698198	-2.66858	-0.150438	-2.64119	3.08986	2.77748	-2.50042	2.59981	-0.0928602	-4.17338	2.18534	-3.13627	-2.74144	-0.293554
Neural Progenitor Cell;GSK-461364;trt_cp;0.37 uM;24 h	-0.145687	-0.106264	-0.0812124	-0.181552	-0.314844	-0.430861	-2.62748	-0.100966	-0.163997	0.157925	0.400973	-0.114042	-0.350756	-0.245868	-0.0236849	-0.154623	-0.0834325	-0.203411	0.397937	-0.260607	0.497108	0.201612	-0.141804	0.704512	-0.76381	0.384208	0.202817	0.66306	-0.640588	0.646569	-0.345834	0.544253	2.90769	0.0906768	0.678018	0.336497	-0.0786766	-0.533033	-0.0404358	2.36043	0.108651	1.06963	0.132919	0.120713	3.14317
Neural Progenitor Cell;ischemin;trt_cp;0.37 uM;24 h	-0.226925	2.53092	0.0106401	-0.400067	-1.86241	-2.35165	-0.2799	-0.651794	-1.73724	-0.186385	2.89659	0.227328	0.356451	2.77489	2.73566	0.0738747	2.42812	0.496839	2.85623	2.52642	3.36758	3.44247	0.497346	2.56742	0.190351	-0.224248	-2.6025	0.399918	-0.345605	2.68801	-0.523741	0.0914774	3.35883	-0.398636	0.139195	-0.136392	-0.361928	-0.277464	0.063503	0.111122	-2.99989	-2.35051	-2.5477	-2.25444	-0.00745389
Neural Progenitor Cell;C-646;trt_cp;0.37 uM;24 h	2.80912	3.15802	3.05382	2.58896	2.90497	0.220544	2.87778	-2.27814	2.74656	3.11689	0.0963567	0.158872	2.65803	2.79038	0.177032	-2.18374	3.09582	0.591587	3.28156	2.91622	4.33058	3.62481	3.32954	2.74217	-0.499476	-0.446592	-2.44079	0.887667	-0.63646	2.60536	-0.790461	-0.48227	3.4962	1.00245	0.419266	0.536262	-0.0511039	2.70052	0.226045	2.54222	-2.75615	-0.246019	-0.250587	2.03228	0.157941
Neural Progenitor Cell;dasatinib;trt_cp;0.37 uM;24 h	0.0257106	2.53556	1.82111	2.33486	2.07874	-2.12591	2.51704	-0.375416	2.10999	2.06427	2.71769	0.00146868	-0.25151	0.139832	0.116144	-2.08352	2.49571	0.206204	0.269034	0.290861	3.13871	3.22298	1.1321	0.307842	-1.80717	-0.0158954	-0.331459	1.2852	-0.48926	2.62831	-0.469493	0.0314987	1.27368	0.0968242	2.90101	0.106093	-0.0716706	2.62796	0.108896	2.75826	-2.92013	0.194662	-0.410181	0.00636442	0.228508
Neural Progenitor Cell;NU-7026;trt_cp;0.37 uM;24 h	1.96761	2.58874	1.79558	0.1886	0.676519	0.422944	2.15149	-0.660888	1.91694	0.979786	2.79666	0.276184	0.162174	2.46319	2.43833	-2.47425	2.82214	0.518508	2.62788	2.39071	3.11653	2.90512	0.378789	0.609258	1.96859	-0.332609	-2.3418	0.575883	-0.535112	2.55841	-0.34992	-0.0488718	1.09232	0.116527	-1.93577	0.0289556	-0.202091	-0.354215	-0.375905	0.031761	-3.29175	-2.09213	-2.71441	-2.74628	0.260754
Neural Progenitor Cell;tranylcypromine;trt_cp;0.37 uM;24 h	-2.66479	-0.362336	-2.23686	-0.665189	-3.0766	-2.48777	-2.6065	-0.483522	-2.73864	-2.34373	2.79576	0.0151044	-0.0787876	2.32025	2.17405	-0.273025	2.47488	0.355879	0.177355	0.331111	0.585912	3.29611	-2.55529	2.83616	0.184767	-0.311076	-2.36908	-0.174386	-0.620673	2.38667	-0.476368	0.231355	2.82019	-2.6341	-0.134176	-2.45799	-2.85008	-2.69865	-0.472592	0.183484	-3.31226	-2.2164	-0.336939	-2.81636	-0.23169
Neural Progenitor Cell;ABT-737;trt_cp;0.37 uM;24 h	-2.66473	-2.32593	-2.36926	-2.73284	-3.24697	-2.25384	-2.69508	-0.802597	-2.68071	-1.93616	2.56881	0.309434	-0.172077	0.146931	0.092897	2.03587	0.135311	-0.144113	-0.324788	0.0286401	0.229676	2.77682	0.0805318	2.16107	0.294467	-0.294815	-2.36001	-0.0942446	-0.569893	2.31907	-0.313251	0.428145	2.80438	-2.66127	2.43871	-0.563159	-0.395003	0.174859	-2.33889	0.485434	-2.71521	2.21617	1.95462	-2.28414	2.73808
Embryonic Stem Cell;everolimus;trt_cp;0.37 uM;24 h	-0.0869515	0.175123	0.0950129	-0.0904408	0.132211	-0.0796962	-0.157243	0.049758	0.237709	0.0712512	-0.0866902	-3.53895	-3.59242	-3.42192	-0.385726	-2.79384	-0.141667	-2.77089	-2.87172	-3.34441	-3.163	-0.647342	-3.46651	-3.07472	-2.82643	-0.130763	0.490596	0.0908322	-2.43978	0.446335	0.104499	0.885501	-2.80092	-0.356338	-0.0539329	0.570009	3.29286	-0.31791	2.45349	-0.0863778	-3.72249	2.79028	-2.86259	-2.45625	0.329049
Embryonic Stem Cell;WZ-4002;trt_cp;0.37 uM;24 h	0.200239	0.673348	0.359533	2.54242	2.86152	0.127243	0.228607	0.250647	0.591059	0.358136	0.269813	-3.32228	-3.48242	-3.02967	2.46219	-2.7325	0.0257122	0.0536369	-0.129235	-0.614059	0.0647551	0.333925	-3.25147	-2.56725	-2.51697	-0.143497	0.105661	-0.182383	-0.481657	0.525224	-2.18144	0.677748	-2.81787	-0.0486013	-2.39818	3.03606	2.9462	-2.50114	2.57595	-0.0691472	-3.87168	2.26578	-2.71523	-2.91809	0.0924567
Embryonic Stem Cell;PD-0325901;trt_cp;0.37 uM;24 h	-0.0736919	0.121219	0.130198	2.20334	0.11522	-2.49675	0.0356816	0.171345	0.279264	-0.22325	-0.152885	-3.3686	-3.69516	-3.51231	-0.453486	-2.96445	-0.627631	-2.70612	-2.99744	-1.06382	-3.29334	-0.521127	-3.75799	-3.3272	-2.71102	-0.10328	0.6685	-0.0822653	-0.227414	3.07247	-2.21921	1.07404	-2.79905	-0.830212	-2.55408	0.370522	3.12622	-0.272939	2.79002	-2.24337	-3.9949	0.523261	-3.0214	-2.81159	0.0352198
Embryonic Stem Cell;BMS-777607;trt_cp;0.37 uM;24 h	-0.00754609	0.434558	0.0742973	0.280729	0.520887	-0.181058	-0.0160949	0.193428	0.456127	0.100233	0.268707	-3.4699	-3.64516	-3.37766	0.132598	-2.70907	-0.0956648	-2.53927	-0.330809	-0.635673	-0.209931	0.330716	-3.22951	-2.82229	-0.181892	-0.2049	0.264592	-0.0843318	-0.210747	0.360577	-2.34825	0.551714	-2.7754	-0.401535	-2.43376	2.99497	2.99286	-2.43085	2.8055	-0.0170624	-4.06531	0.593341	-2.7313	-2.89207	-0.0280426
Embryonic Stem Cell;A-66;trt_cp;0.37 uM;24 h	0.0872155	0.399529	0.145565	0.210855	0.576277	0.0402279	0.09829	0.172157	0.384882	0.229619	-0.0826367	-1.0712	-3.55886	-3.06588	-0.041862	-2.71496	-0.195851	-2.4518	-0.369089	-0.78399	-0.119628	0.118112	-3.00883	-2.78619	-2.65862	-0.0789138	0.445824	2.46184	-0.3982	0.615399	-0.0263557	0.948747	-2.6196	-0.123614	-2.39506	2.91321	2.93668	-2.60938	2.61657	-0.174015	-4.04725	0.875776	-2.81837	-2.67152	0.120541
Neural Progenitor Cell;GDC-0068;trt_cp;0.37 uM;24 h	2.56476	2.65101	2.57226	2.09203	0.487435	0.446009	2.29323	1.88034	0.982635	0.675968	2.40671	0.469931	0.285368	2.31632	0.501252	0.0956309	2.535	-0.0115255	0.460779	2.61014	3.32153	3.16835	0.519503	3.12451	-0.197823	-0.444812	-0.640599	0.796865	-0.512839	2.5928	-0.248607	-0.0362866	0.846771	0.371381	1.93396	-0.483907	-0.507237	-2.66009	-0.959008	2.19502	-3.43412	-0.410289	-2.33966	-3.01838	0.404479
Neural Progenitor Cell;D-4476;trt_cp;0.37 uM;24 h	1.84814	2.46136	0.435973	0.324156	0.259493	-0.150899	0.00842703	-0.442285	-0.162621	0.487424	0.327556	0.476604	0.292349	0.389689	0.581869	0.19612	0.107926	0.0133514	2.62968	2.31579	1.3695	3.25407	0.650761	2.89446	0.327439	0.16121	-2.34961	0.818861	-0.714941	2.37519	-0.844826	-0.152347	3.77816	-0.0734879	0.712746	0.125003	-0.563948	-0.185982	-0.0666139	2.73848	-0.159777	0.307174	-0.12785	0.290759	2.9116
Neural Progenitor Cell;JW-55;trt_cp;0.37 uM;24 h	-0.783785	2.23953	1.77307	-0.213417	-0.242304	-2.18063	-0.510557	-0.562204	-1.93653	0.294593	0.671287	0.0475884	0.203013	2.50196	2.4142	-0.0914518	2.48315	0.675572	2.62512	2.54904	0.957972	3.42818	0.0129865	2.66379	0.153227	-0.282343	-2.35974	-0.149005	-0.459022	2.64	-0.348433	0.161404	2.88854	-0.0101403	-0.0325391	0.255043	-0.101398	-0.422136	-0.247743	0.207267	-3.33049	-2.31718	-2.44143	-2.71575	-0.126459
Neural Progenitor Cell;daminozide;trt_cp;0.37 uM;24 h	-2.18406	0.318553	0.308472	0.182819	-0.0534142	-2.54791	0.187002	-1.02409	-0.000283295	0.0175512	0.29073	0.308256	-0.224175	0.0775624	0.29955	-2.13802	0.0453503	0.323624	0.631648	-0.0864391	1.11723	2.88457	0.343302	0.630838	-1.71259	-0.216691	-0.134984	0.754332	-0.51554	2.72916	-0.678093	0.25274	3.68856	-0.0978622	0.546547	0.223508	-0.439148	0.00396487	0.18986	2.28571	-2.96804	0.225147	-2.40157	0.0584035	2.56634
Neural Progenitor Cell;OSI-930;trt_cp;0.37 uM;24 h	0.0789812	0.302703	0.132026	-0.201088	0.0761753	-0.01304	0.113311	-1.90115	0.0778494	0.129085	0.0465882	-0.0688457	-0.468734	-0.784397	-0.0416703	-0.209712	-0.196464	-0.390781	0.0517183	0.155316	0.51852	0.39731	0.248841	0.194996	-1.88156	-0.519637	-0.159825	0.981571	-0.394469	2.88762	-0.326847	0.438283	0.431712	-0.241282	0.0320708	-0.0972016	-0.221291	-0.135179	-0.441023	2.5848	-3.44888	0.272327	-0.342515	-0.32587	0.559927
Neural Progenitor Cell;GSK-J1;trt_cp;0.37 uM;24 h	-0.159486	0.203234	-0.0464809	-2.43666	-0.220271	-2.40568	-2.32205	-0.387772	-0.345442	0.16708	2.2935	-0.324686	-0.191831	-0.200357	-0.0818586	-2.31298	0.164828	0.0998936	2.11244	-0.119183	0.876308	2.98438	0.241796	0.556043	-1.97328	-0.107009	-0.0168366	0.815871	-0.578468	2.69664	-0.398881	0.413452	3.28053	-0.212648	0.328809	0.160644	-0.378738	-0.106619	-0.0526002	2.62377	-2.73352	2.35504	-0.235182	-0.118913	2.97677
Neural Progenitor Cell;PF-573228;trt_cp;0.37 uM;24 h	-2.09799	1.90235	-2.0526	-2.33197	-0.403552	-2.20732	-0.653145	-2.22054	-2.29683	-1.62244	0.266991	-0.155222	-0.167725	0.208741	0.0107533	-2.46787	2.30755	0.57473	2.3347	2.21821	3.21121	3.36802	2.39165	0.925215	0.160479	-0.121096	-2.02954	0.157225	-0.620742	2.55699	-0.598533	0.216836	2.86429	0.0963967	0.191405	0.488117	0.12997	0.236354	-0.0655167	2.6448	-3.05711	2.20856	0.0386018	-2.46504	-0.115174
Neural Progenitor Cell;AT-7867;trt_cp;0.37 uM;24 h	-0.203412	0.0815481	-0.148164	-0.227283	-0.103081	-0.168387	-0.235447	-0.343383	-0.0201367	0.0598537	0.173827	0.117578	-0.425711	-0.738476	-0.096417	-0.151562	0.00209718	-0.494876	-0.30508	-0.267492	0.594544	-0.568638	0.083586	0.28829	-0.815689	-0.165945	0.266223	0.99578	-0.438128	2.66896	-0.614665	0.442315	0.526624	-0.0569221	-0.507048	-0.188413	-0.308814	-0.30999	-0.187913	0.106831	-1.20363	0.406819	-0.0346442	-0.00635025	0.632574
Neural Progenitor Cell;ponatinib;trt_cp;0.37 uM;24 h	-1.98505	2.27424	-2.00921	0.344776	1.89502	-2.2042	1.99384	-1.10094	1.72789	0.0599005	-0.21744	-0.105731	-3.31558	-0.81821	-0.374415	0.0425542	-0.393761	-0.107205	-0.0804288	-2.53579	0.561293	0.169334	0.643666	-0.267728	-0.239677	-0.577051	-0.133214	1.2869	-0.855581	2.93559	-0.843868	0.149913	0.53049	-0.73899	2.522	0.199595	-0.290676	2.73592	0.224456	3.07869	-0.302397	0.6411	-2.9504	0.0828094	2.41732
Neural Progenitor Cell;SGX-523;trt_cp;0.37 uM;24 h	-2.41373	0.209367	-0.0643629	-0.132191	-0.104697	-2.46632	-0.362792	-2.16903	-0.421826	0.260977	2.65419	0.124328	0.155081	0.294158	0.528758	0.307817	0.107167	-0.0101486	2.65786	2.38203	0.906004	3.27413	0.530041	2.71395	0.306977	0.0137336	-2.4315	0.336375	-0.492117	2.09916	-0.419442	0.501125	3.1979	-0.0845286	2.85435	0.252246	-0.33263	-2.26042	-0.0754861	2.47942	-2.36564	0.279997	2.35308	-2.03114	2.66434
Neural Progenitor Cell;SAR-245409;trt_cp;0.37 uM;24 h	2.96354	3.00149	2.90786	0.770664	3.2189	0.447728	2.92025	0.0968184	2.90348	1.09877	0.0344065	0.255449	-0.0658073	-0.263655	0.485315	-0.0225158	0.183991	-0.282951	0.61182	0.406767	1.19387	0.465781	1.00437	0.380962	0.17135	-0.0965338	0.126447	1.27379	-0.419439	3.02473	-0.621166	0.43757	0.894529	0.456168	0.582194	0.294318	-0.478881	0.279242	-0.128435	0.775432	-0.646576	-0.0298552	-0.603073	-0.133677	0.393598
Embryonic Stem Cell;BRD-K68336408;trt_cp;0.37 uM;24 h	0.0863687	0.350196	0.272732	0.147234	0.557192	0.107355	0.0599427	0.139893	0.360769	0.220362	0.0657866	-0.908553	-3.45703	-3.01701	0.147208	-0.588097	-0.118466	0.106591	-2.3551	-0.64821	-0.233382	0.157685	-3.10223	-2.678	-2.33301	0.0910081	0.118364	-0.0845992	-0.29328	0.434067	2.05029	0.775648	-2.82059	-0.0935686	-2.40456	0.403887	0.480804	-2.71976	2.33204	-0.311874	-3.85599	2.368	-2.68625	-2.72502	-0.0518302
Kidney Cell;MK-0752;trt_cp;0.37 uM;24 h	0.310459	0.027624	0.2474	-0.213098	0.190137	0.273551	0.677465	0.220095	0.137299	-0.0487896	0.593547	0.582814	2.87554	2.25943	0.868222	2.51723	0.216217	-2.83125	-0.269569	0.273728	-0.304585	-0.471499	0.0951812	-0.537367	1.41135	1.72279	0.161422	3.01524	2.34924	2.94696	2.61764	2.41202	-2.69512	-3.71192	2.22554	-0.278996	-0.54558	3.00401	0.556383	0.686617	2.52611	-0.412168	0.0145869	2.52597	0.385605
Neural Progenitor Cell;dabrafenib;trt_cp;0.37 uM;24 h	-0.419591	2.07665	2.2119	0.106579	0.338511	-2.07146	-0.139505	-0.169716	-0.00957202	0.566937	2.54883	0.0657523	2.61678	2.72506	0.189283	0.120987	2.78371	0.568365	3.00482	3.0784	3.78187	3.33865	-2.31564	2.83554	-2.25007	0.390033	-2.38527	-0.212896	-0.608313	2.91643	-0.541351	0.29563	3.16281	0.711126	-0.0150312	0.191889	0.0479458	-3.31714	-0.211014	-0.110465	-2.9729	2.0842	2.23744	-2.41064	2.65795
Neural Progenitor Cell;chelerythrine;trt_cp;0.37 uM;24 h	-2.33929	0.139034	-2.31558	2.14045	0.1067	-2.37103	0.0409915	-0.22965	0.0499105	0.00521697	-0.192611	0.745351	-0.442072	-0.327194	0.221461	-1.94446	-0.574033	-0.337228	0.211182	0.475017	1.0982	0.448994	0.40012	0.28376	-0.426179	-0.0457204	-0.145827	1.10827	-0.816384	2.7568	-0.758258	0.276626	3.52121	-0.166471	0.903627	0.230376	-0.19888	-0.0180322	-0.0583954	0.874285	0.239488	0.815672	0.571983	0.180181	3.18132
Neural Progenitor Cell;GSK-J2;trt_cp;0.37 uM;24 h	-2.53438	-2.38056	-2.27337	-0.521012	-2.94396	-2.5129	-2.46895	-0.678326	-2.29917	-2.08443	0.329922	0.816305	-0.365937	-0.0725746	0.0267213	0.208212	-1.1701	-0.423542	-0.356627	-0.589622	0.260756	-0.137423	0.207743	-0.113251	-1.93487	-0.015644	0.0572018	1.07074	-0.166519	0.99558	-0.505639	0.414073	1.413	-3.23345	0.676118	-0.350507	-0.468668	0.0472426	-0.241381	2.34448	-0.264647	0.258896	-0.233484	0.538666	2.99005
Neural Progenitor Cell;BMS-777607;trt_cp;0.37 uM;24 h	0.37379	0.597789	0.474657	-2.27369	0.0136557	0.27603	0.216384	-1.99343	0.3459	0.490302	2.52653	-0.031657	-0.051056	-0.0165403	0.283599	1.82718	2.78084	-0.104742	2.09967	2.47219	0.94486	3.15527	0.339294	2.76567	-1.92783	-0.646702	-2.47991	0.531818	-0.558235	2.39083	-0.282949	0.0309612	0.0504625	0.116098	-2.28237	-0.576289	-0.448914	-2.42936	-2.70139	0.100858	-3.8541	-0.159972	-2.06497	-3.02841	0.147267
Neural Progenitor Cell;GSK-1059615;trt_cp;0.37 uM;24 h	-0.37421	2.4563	1.58377	2.05098	0.51842	-1.92238	2.21869	-2.27334	-0.0661016	1.86513	0.331286	0.260487	-0.0207069	2.26902	0.216668	-0.0945657	2.4048	0.349517	1.98182	2.2986	1.14473	3.03055	0.905183	0.197796	-1.78118	-0.147498	-0.174963	0.748026	-0.605844	2.62491	-0.478131	0.166482	1.20451	0.0345118	2.14171	-0.15404	-0.449516	2.51146	-0.31124	2.47934	-3.4891	0.217663	-2.76409	-2.74307	-0.351175
Neural Progenitor Cell;LY-2603618;trt_cp;0.37 uM;24 h	-0.33685	2.11477	0.478722	0.065007	-0.0909111	-1.95614	2.00727	-0.537872	0.223946	0.56914	2.93286	0.657148	0.131552	0.251684	2.77138	2.12826	0.154576	0.0654477	2.36435	2.3768	0.877773	3.03722	0.518645	2.68171	0.315703	0.234333	-0.26433	1.02257	-0.350254	0.831763	-0.42565	0.107467	1.41828	0.0172968	0.670344	0.061401	-0.0592612	-0.0498866	-0.282231	2.27906	-0.277254	0.639747	0.312517	0.00390485	2.48774
Epithelial Cell;trehalose;trt_cp;0.37 uM;24 h	-0.142723	-0.53574	-0.0450209	0.430725	0.31742	-0.424373	-0.520061	-3.31496	-0.524404	-0.478894	-1.0117	-3.60312	-3.31099	-2.67603	-0.605018	-3.53527	2.14002	0.720057	0.318309	-0.00365347	0.0659828	2.14584	-0.19768	0.592272	-0.358912	-0.755778	0.544789	-0.260771	-0.842603	-0.416402	0.00906863	0.221049	-0.699293	4.29115	0.158304	0.548587	0.589206	2.26005	0.315852	-2.50244	0.375265	3.01322	-0.999314	2.91884	-0.850441
Neural Progenitor Cell;azacitidine;trt_cp;0.37 uM;24 h	-1.97528	0.167992	0.0127718	-0.0454615	-0.233981	-2.13797	1.89643	-1.91023	-0.00239804	0.349463	2.28604	-0.00513434	-0.0475167	0.00277807	0.242816	1.9432	0.197363	-0.265683	0.23433	-0.0231169	1.04255	3.04317	0.765198	0.50003	-0.191128	0.153848	-0.369917	1.12897	-0.847885	2.72577	-0.520064	0.706499	3.14119	-0.0481457	2.96528	0.636699	-0.145499	0.384139	-0.186714	2.73747	0.151851	0.791754	0.292519	0.25546	2.55558
Neural Progenitor Cell;methylstat;trt_cp;0.37 uM;24 h	-0.346742	2.26034	0.324393	0.415145	0.634245	-2.19878	2.05287	-1.01649	0.327578	1.73557	2.53055	-0.22643	0.0209175	0.242186	0.121547	0.31375	0.2566	-0.0323744	2.52628	2.70883	1.34488	3.37598	1.22023	0.942853	1.77022	-0.316406	-0.237291	0.823903	-0.393552	2.58238	-0.420112	0.359564	2.91418	-0.0250857	2.66637	0.377827	-0.204837	0.556108	0.0563398	2.57618	-2.71623	0.422908	-0.165192	0.343354	0.178721
Neural Progenitor Cell;AZ-20;trt_cp;0.37 uM;24 h	-0.184769	2.28203	0.644371	-0.108489	0.0038249	-1.89851	0.0608143	-0.780083	0.195456	0.303628	2.98335	-0.0909537	-0.108949	0.14261	0.295229	2.16222	2.56092	0.186816	2.24575	2.37862	1.0295	2.97081	0.499732	0.758639	-0.286908	0.255845	-0.0730149	0.6423	-0.200323	2.63037	-0.363472	-0.0231597	1.16999	-0.236097	0.398336	0.220207	-0.0561432	0.24075	-0.376111	2.2311	-2.85541	0.517523	-0.176173	-0.192892	2.22933
Embryonic Stem Cell;KIN001-270;trt_cp;0.37 uM;24 h	0.0894886	0.301267	0.154662	0.150564	0.590949	0.050564	0.0629995	0.288782	0.379684	0.208802	0.0649096	-3.24672	-3.50184	-3.19856	-0.0943614	-2.73665	0.0371612	-2.5729	-2.71256	-0.697944	-0.31451	0.0213744	-3.32411	-2.91456	-2.53195	-0.165932	0.209538	-0.093393	-0.405477	0.543861	-0.204861	0.70407	-2.66231	-0.102575	-2.57794	0.407076	3.11295	-2.80057	2.43888	-0.240256	-4.02039	1.03774	-2.87202	-2.87881	-0.0047057
Neural Progenitor Cell;KIN001-242;trt_cp;0.37 uM;24 h	-2.5659	-0.00331312	-0.33786	-2.37141	-0.652564	-2.6657	-2.46511	-0.633257	-0.858017	-0.132639	0.133248	-0.221243	-0.320805	-0.122321	0.0809638	-2.33033	2.40136	0.174828	-0.0385287	2.42739	1.0545	3.32904	0.391814	2.74507	0.174097	-0.256875	-0.212633	0.174632	-0.685328	2.38557	-0.286176	0.251648	3.10588	0.279778	2.31638	0.0228208	-0.522015	-2.48395	-0.283778	0.104546	-2.95704	2.21656	-2.32262	-2.56518	-0.159834
Neural Progenitor Cell;anacardic-acid;trt_cp;0.37 uM;24 h	-2.84322	-0.229396	-0.364056	-2.61194	-2.76132	-2.58049	-2.68642	-2.01676	-2.49072	-0.344928	2.55762	0.00868691	-0.244407	-0.140204	0.0912388	-1.87322	0.240067	0.0235914	0.0404392	2.46996	0.621877	3.1741	-0.148089	2.68554	0.179657	-0.227642	-0.424326	0.0968387	-0.414764	2.72888	-0.446779	0.291354	2.88828	-0.48279	0.237458	-0.153258	-0.407716	-2.52738	-0.316104	-0.0313459	-3.16017	0.202565	0.0788177	-2.5739	2.36336
Neural Progenitor Cell;UNC-669;trt_cp;0.37 uM;24 h	-0.784856	-0.104496	-0.665586	-0.27562	-1.94945	-0.796779	-0.590097	-0.59761	-1.9736	-0.36407	2.73128	0.115226	0.312125	2.40591	2.65018	0.0994613	2.21405	0.567934	0.24902	0.325956	3.04085	3.4323	-0.0416729	2.58015	0.369691	-0.350601	-2.51822	-0.0842501	-0.249423	2.67386	-0.403032	0.131716	2.96981	-2.75512	1.91982	-0.270049	-0.168171	-0.363923	0.36093	0.0639119	-3.2081	-2.25968	2.09198	-2.60093	0.346491
Neural Progenitor Cell;BRD-K09991945;trt_cp;0.37 uM;24 h	0.495579	0.342552	0.315028	-2.16188	0.0617839	0.247384	0.0821993	-2.01691	0.320112	0.250298	2.35846	0.0625649	-0.0352723	-0.253156	0.404149	1.94564	0.242994	-0.23103	2.01483	2.33059	0.974197	2.74391	0.190988	2.76845	-0.0719912	-0.496086	-0.520558	0.791	-0.593167	2.58708	-0.506756	0.0559739	0.245738	0.194585	0.0413763	-0.0590823	-0.502325	-0.214186	-0.561739	2.64051	-3.33504	-0.221453	-0.244098	-3.0358	0.530878
Neural Progenitor Cell;JNK-IN-5A;trt_cp;0.37 uM;24 h	2.10171	0.219643	-0.005315	0.10185	-0.152331	-0.363529	-0.332726	2.10923	-0.330832	0.0927096	0.297675	0.0487116	0.461954	0.269446	0.58593	0.182404	0.0143749	-0.227078	2.30856	2.59317	0.840485	2.67062	-0.335751	3.19591	2.15068	0.104832	-0.28688	0.389511	-0.209967	0.187846	-0.211046	0.216051	3.12966	-0.0515092	0.892784	0.550647	0.23405	-2.91914	-0.478161	0.417388	3.02642	0.386178	3.12226	0.424806	3.57518
Neural Progenitor Cell;pyrazolanthrone;trt_cp;0.37 uM;24 h	-0.389845	2.46788	1.82161	-0.0951396	-0.015311	-2.14482	-0.222897	-0.499787	-0.126441	1.56972	0.499222	0.185061	0.0956762	2.30766	2.47775	-0.365178	2.70906	0.283186	2.77831	2.50772	3.3064	3.51357	0.126076	3.02725	0.207232	-1.96544	-2.55444	0.19565	-0.541664	2.44939	-0.366747	-0.0163448	3.03089	-0.0979993	2.21081	0.0230819	-0.279502	-2.5582	-0.189229	0.0935349	-2.67359	-2.25403	-2.06783	-2.6684	-0.0721194
Embryonic Stem Cell;BRD-K09991945;trt_cp;0.37 uM;24 h	0.0458539	0.529031	0.19293	0.423092	0.684657	-0.124143	0.182859	2.30739	0.528839	0.151762	-0.266281	-3.70692	-3.83065	-3.59433	-0.556838	-2.96664	-0.488743	-0.430931	-0.521504	-0.84226	-0.325939	-0.322033	-3.55728	-1.15434	-2.53761	-0.0267145	0.756366	0.000212083	-2.44083	0.641455	-2.47484	0.944712	-2.70165	-0.0341655	0.0429601	3.30695	3.44247	-0.573739	2.71164	0.220291	-3.60531	0.971639	-2.72706	-2.5097	2.74369
Embryonic Stem Cell;HG-14-10-04;trt_cp;0.37 uM;24 h	0.071521	0.479229	0.227131	0.351584	0.623969	-0.123318	0.0683567	0.329846	0.40818	0.0775877	-0.0902703	-3.54022	-3.72578	-3.5522	-0.233079	-2.87117	-0.229313	-2.45412	-0.550969	-0.784081	-0.248328	0.125151	-3.34417	-2.78874	-2.66231	-0.18379	0.349343	-0.0408662	-0.304275	0.366568	0.00376152	0.843637	-2.56796	-0.365438	-2.44086	3.08536	2.91704	-2.48427	2.68136	-0.122907	-4.00348	2.4001	-2.80922	-2.69051	0.207211
Neural Progenitor Cell;FR-180204;trt_cp;0.37 uM;24 h	2.3387	2.45776	0.860179	0.44751	0.963273	0.0577278	0.511792	-0.430515	0.759083	0.53019	0.642823	-0.0354151	0.0525247	-2.40697	0.390531	0.202329	0.6174	-0.142412	2.37403	2.66302	1.0315	3.07026	0.49216	2.55763	-0.137514	-0.510921	-0.264025	0.700372	-0.304195	3.22067	-0.488164	0.296509	0.370404	-0.146314	-0.460286	-0.30485	-0.472569	-2.61024	-0.00468289	2.22771	-3.57088	-0.393187	-2.18997	-2.96026	0.178467
Neural Progenitor Cell;PD-0325901;trt_cp;0.37 uM;24 h	1.94806	2.6687	2.2984	2.31897	-1.34117	-1.50656	2.01414	-0.31015	1.61489	1.52892	2.76255	0.673418	0.0801605	0.310737	0.157085	0.201873	0.198614	-0.0252564	-0.338134	-0.00330691	0.955874	2.58942	-0.213622	2.60963	0.100756	-0.536023	-0.719074	0.697174	-0.658846	0.820071	-0.63648	-0.319831	3.16857	-0.379334	-0.0196904	-0.521138	-0.717	-2.70088	-2.14526	2.33219	-3.03186	-0.749401	-0.368219	-0.590429	3.02906
Neural Progenitor Cell;A-769662;trt_cp;0.37 uM;24 h	-0.647622	2.11414	0.307853	0.0369121	0.0959583	-2.0388	-0.228454	-2.35803	-1.94447	0.357221	0.0929176	0.206906	0.275297	0.478166	0.525727	0.223558	0.19955	0.170984	2.33192	0.304262	1.10419	3.05271	0.3777	2.76274	0.120974	-0.461413	-2.34188	0.707418	-0.64203	2.27062	-0.547492	0.188778	3.18793	0.11079	0.593155	0.0931444	-0.158722	0.517032	-0.0707084	2.1839	-2.43483	2.131	0.39676	0.533046	2.32439
Embryonic Stem Cell;XMD-885;trt_cp;0.37 uM;24 h	-0.284736	0.0897894	-0.100831	0.0216871	0.272389	-0.182353	-0.119085	0.0946649	0.262226	-0.0999773	-0.0808534	-3.37002	-3.57146	-3.29027	-0.125691	-2.83408	-0.392967	-2.72282	-2.71443	-3.15615	-2.87162	-0.284903	-3.45134	-2.89761	-2.5756	-0.109008	0.383868	0.229787	-0.465397	3.16832	0.0469793	0.926561	-2.87407	-0.421009	0.197727	0.660494	3.26848	-0.415618	2.5562	-0.0934085	-3.66922	1.06424	-2.93467	-2.64129	0.235777
Embryonic Stem Cell;AT-7867;trt_cp;0.37 uM;24 h	0.0192269	0.325391	0.109525	0.295324	0.541266	-0.0555539	0.110946	-0.0225238	0.448968	0.190008	-0.324801	-3.51948	-3.59969	-3.4219	-0.361935	-2.90248	-0.231381	-2.45159	-0.457074	-0.85209	-0.0922936	0.19673	-3.33915	-0.865226	-2.56678	0.0464209	0.637152	0.29687	-2.34261	0.526678	0.157156	1.20321	-2.90027	-0.0743007	-2.20728	3.13052	3.33989	-0.561165	2.83387	-2.36744	-3.79607	2.74868	-2.83926	-2.42316	0.195267
Neural Progenitor Cell;regorafenib;trt_cp;0.37 uM;24 h	-0.683469	2.18104	-1.70369	-0.0508326	-2.44094	-2.2702	-0.267535	-0.899172	-1.96044	-1.7889	2.88036	0.434544	-0.184742	0.200623	0.188403	2.0322	-0.0110302	0.0229179	-2.16492	-0.153884	0.789022	2.85933	0.589581	0.574752	0.121123	-0.382409	-0.539984	0.634654	-0.592295	2.51425	-0.527069	0.00887068	3.11953	-2.71341	0.165434	-0.463999	-0.68156	-0.338017	-0.435612	0.281799	-3.00408	-0.200163	-2.5069	-2.54788	2.44389
Neural Progenitor Cell;veliparib;trt_cp;0.37 uM;24 h	-0.475028	2.35487	0.468474	2.13478	0.108972	-2.04148	-0.172677	-0.52249	-0.241034	1.84035	2.54408	0.517445	0.551781	2.61613	2.8145	2.09481	2.05133	0.0582746	2.59369	2.47684	3.37507	3.19281	0.615433	2.93025	0.629445	-0.0862275	-2.49137	0.781171	-0.584025	2.24148	-0.701845	0.141281	3.32804	-0.283055	0.801526	0.312102	-0.375779	0.0447307	-0.0315759	2.36766	-0.103372	-0.0501714	0.320936	0.376327	2.86514
Neural Progenitor Cell;ZM-447439;trt_cp;0.37 uM;24 h	-0.829344	1.97852	-1.80739	-0.32966	-3.01084	-2.27516	-0.527291	-0.386566	-2.31636	0.0253928	2.72783	0.146377	0.415236	2.68867	0.30167	2.45748	2.29747	0.223026	0.297174	2.41505	3.41958	3.14895	0.0787993	2.80379	0.117311	0.517708	-0.354776	0.358326	-0.42302	2.64398	-0.367271	0.500476	3.2052	-0.263084	2.48427	-0.147482	-0.21924	-2.5215	-0.360111	1.88967	-2.26206	0.101212	0.146762	0.0264811	2.90004
Neural Progenitor Cell;SB-203580;trt_cp;0.37 uM;24 h	0.281606	2.47177	2.66449	0.102624	1.80798	-0.157588	0.104975	-0.472793	0.117405	2.67822	0.760844	0.561384	2.2717	2.773	2.79643	0.134748	2.44263	0.244928	0.32237	0.527017	3.58213	3.44367	3.14959	2.77835	0.106437	-0.174376	-2.86258	0.484751	-0.694938	0.529981	-0.36756	-0.347831	2.85606	0.389509	2.47042	-0.030885	-0.339703	-0.462327	-0.386103	0.273075	-2.71031	-1.93997	-2.22301	-2.67477	-0.444184
Neural Progenitor Cell;GSK-J4;trt_cp;0.37 uM;24 h	0.461692	0.544359	0.480507	0.129624	0.287611	-0.00183557	0.328298	-2.53755	0.179912	0.795663	-0.088671	0.00534832	0.0646806	2.61056	0.48262	-0.165384	0.198803	-0.0222578	2.70127	2.4346	1.45077	2.90969	0.922831	0.408632	-0.842569	-0.247345	-0.465452	0.995653	-0.551274	2.25667	-0.601679	0.19608	3.22333	0.507029	2.5547	0.562279	-0.393125	0.505917	0.206341	2.83208	-0.132987	2.28695	-0.353523	0.74738	2.46237
Neural Progenitor Cell;serdemetan;trt_cp;0.37 uM;24 h	-0.415117	2.18586	0.642928	2.14479	-0.0224391	-1.97592	0.0688857	-0.890394	-0.131391	2.03134	2.67813	0.186798	0.459985	2.47496	2.66355	1.94619	2.43932	0.0968441	2.69443	2.67524	3.6174	3.33526	1.03569	2.79526	0.511724	0.118965	-0.293307	0.78746	-0.52437	2.17356	-0.336177	-0.241538	3.26267	-0.0253185	0.263158	-0.0916026	-0.277005	-2.3837	-0.106055	2.30649	-2.58813	-0.0480618	0.0866117	-2.11122	2.33025
Neural Progenitor Cell;XMD-1499;trt_cp;0.37 uM;24 h	0.113677	2.58137	2.26515	2.68838	1.82345	1.82316	0.31869	-0.277231	0.0864331	0.334253	2.64825	0.843379	0.194459	0.505904	0.676884	2.41488	2.15641	-0.263702	2.81164	2.60616	1.29855	3.38021	0.461282	3.077	0.535862	-0.43598	-2.84184	0.687139	-0.387366	2.43623	-0.464921	0.10068	3.3544	-0.489928	3.15778	-0.20117	-0.748022	-2.76037	-0.240922	0.622927	2.44163	-0.345245	2.15276	0.119442	2.97132
Neural Progenitor Cell;ALW-II-49-7;trt_cp;0.37 uM;24 h	2.87178	3.14449	2.98548	0.711059	3.10241	0.489768	2.93145	0.183355	2.98087	1.24588	-0.169601	-0.0257524	0.157573	2.06642	0.556746	2.06419	0.557744	-0.116595	2.98709	3.02567	1.58002	3.20942	1.10326	3.159	-0.152216	-0.237094	-0.489245	1.13135	-0.217179	2.92035	-0.586668	-0.131623	0.854304	0.783217	0.306583	-0.145147	-0.517936	0.0314741	-0.107899	0.482152	-0.816022	-0.116343	-2.09352	-2.41075	0.207186
Neural Progenitor Cell;iniparib;trt_cp;0.37 uM;24 h	-1.79694	2.03014	0.13029	-2.24355	-0.0749947	-1.90356	-0.306212	-0.44289	-0.135419	0.687824	2.73001	-0.0310848	-2.81463	0.0790148	2.59325	-0.220806	0.442858	0.121014	2.15686	0.100064	0.859509	2.84633	0.196915	0.755785	-0.336181	-0.188913	-2.41533	0.52023	-0.728725	2.32042	-0.492438	0.187405	1.09822	0.103907	0.527853	0.295275	-0.0547945	0.101829	-0.0804602	2.37688	-2.66232	0.454075	-1.95384	-2.58829	2.57776
Neural Progenitor Cell;rucaparib;trt_cp;0.37 uM;24 h	-0.532305	2.38094	1.84637	2.15936	-0.143986	-2.12401	0.115148	-0.813574	0.129093	0.256917	2.82181	0.0982314	0.598462	2.59664	0.55942	0.221765	2.40675	-0.0647529	2.83169	2.50612	3.56717	3.41121	0.676259	2.74764	0.320307	-0.213608	-0.507906	0.443204	-0.323492	2.72223	-0.482824	0.123596	3.53063	-0.054441	0.657805	0.151275	-0.388626	-2.26781	-0.109373	0.395507	-2.46621	-0.306961	0.0142341	0.108597	2.57389
Neural Progenitor Cell;bosutinib;trt_cp;0.37 uM;24 h	0.623892	0.294847	0.733115	0.62725	0.829967	0.0680123	0.423628	0.153677	0.228721	0.281454	0.0997188	0.484626	0.301073	-0.437805	2.76704	0.0220104	0.555248	-0.0680142	2.08394	2.5206	1.25941	-0.222446	0.298873	0.870762	0.248121	-0.639229	-0.0682863	0.961296	-2.92371	2.9065	-1.03947	-0.220196	3.0446	0.803073	-0.132571	-0.140368	-0.432173	-3.10869	-0.162168	2.45488	-0.707905	0.226957	0.286625	-0.383309	0.700701
Embryonic Stem Cell;tivantinib;trt_cp;0.37 uM;24 h	0.0757638	0.494948	0.117532	0.124118	0.636974	-0.0305723	0.00533036	0.109923	0.473478	0.22715	-0.0703249	-3.40798	-3.56948	-3.25541	-0.0104014	-2.61112	-0.102775	-0.494865	-0.160231	-0.794288	-0.0107521	0.42242	-3.26499	-1.02819	-2.60033	-0.0633405	0.520365	2.69489	-0.39476	0.58461	-2.23217	0.919158	-2.68777	0.0441578	-2.33379	3.06536	3.15812	-0.520581	0.845212	0.0320178	-3.83592	0.790912	-2.91692	-2.73307	2.42342
Embryonic Stem Cell;ibrutinib;trt_cp;0.37 uM;24 h	0.272808	0.553809	0.365536	0.307413	0.672668	0.229469	0.163044	0.16721	0.554241	0.402048	0.230487	-1.00147	-3.49023	-2.97683	0.0069293	-2.75162	0.172124	-2.27141	-0.209336	-0.60882	0.0648314	0.390669	-2.95751	-2.76206	-2.24182	-0.141594	0.284295	2.5223	-2.39439	0.425043	-0.0211969	0.703385	-2.72459	-0.018498	-2.69313	2.84219	2.91406	-2.71312	2.65947	-0.184625	-4.12549	2.31447	-2.95327	-3.09523	-0.169653
Neural Progenitor Cell;KU-60019;trt_cp;0.37 uM;24 h	-2.27844	-0.124853	-0.479892	-2.52864	-2.27542	-2.23524	-2.32709	-1.03625	-2.20644	0.123363	0.157044	0.537739	-0.45848	0.015421	0.19241	-0.114842	-0.343244	-0.178087	-0.0573116	0.0460619	0.873284	2.64536	0.799378	0.564469	-0.527748	-0.347576	-0.439372	1.24833	-0.647319	0.599621	-0.512713	0.145914	2.84747	-0.275912	2.60286	-0.00330868	-0.436934	0.324697	-0.0911396	2.82393	-0.129164	0.531488	-0.201164	0.563495	2.48622
Neural Progenitor Cell;RG-108;trt_cp;0.37 uM;24 h	0.123087	2.82898	2.41263	2.61117	0.830678	-2.01648	0.323303	-0.573146	1.84551	2.36906	-0.000529133	-0.321172	2.53597	2.87273	2.18624	-0.0761526	2.80642	0.49741	2.99309	0.215135	4.02387	3.52318	2.80287	2.53586	-1.83156	-0.417665	-2.69058	0.696615	-0.796911	2.52164	-0.666769	0.26616	3.51601	0.415282	2.88299	0.289578	-0.195791	0.256172	0.489517	2.86041	0.137036	-0.0508717	0.359569	0.362044	2.89145
Neural Progenitor Cell;JNJ-38877605;trt_cp;0.37 uM;24 h	1.62571	2.52334	0.37817	2.28352	0.0996154	0.193264	2.0018	-0.372728	0.329272	2.37213	0.178101	0.0153989	-0.00657447	2.42451	2.82604	-0.224912	2.41859	-0.0261952	2.27782	2.55799	3.30826	3.18543	0.538024	2.96743	0.259571	-0.165656	-2.38445	1.03922	-0.666367	2.08493	-0.342771	0.158023	2.88421	0.298799	2.48845	0.393518	-0.396355	-0.0394995	-0.291555	2.57075	-2.43794	0.220425	2.0864	-2.52113	2.74346
Neural Progenitor Cell;KI-20227;trt_cp;0.37 uM;24 h	-2.1277	0.286856	-0.10515	0.0590647	0.0794806	-2.42868	0.124537	-2.63152	-0.37975	0.18938	-0.0368356	-0.0319197	-0.0979046	0.3105	0.114624	-0.156523	0.449498	0.471425	2.85717	2.55865	1.20143	3.23643	0.845993	2.99235	0.599936	-0.0277812	-0.369894	0.603385	-0.548488	2.46372	-0.506254	0.102305	2.90599	0.0567723	2.11393	0.145438	-0.239863	-2.24974	0.175153	-0.00895042	-2.91993	2.24804	-2.22073	-0.599083	2.32251
Neural Progenitor Cell;SB-239063;trt_cp;0.37 uM;24 h	-0.786497	-0.229733	-1.76627	-0.611247	-2.5373	-0.375941	-0.541911	-0.718534	-2.26743	0.24993	0.553137	0.521213	2.30405	2.66439	2.46755	-0.199342	0.381954	0.401958	-0.0703195	0.195827	2.66046	3.06679	2.30557	2.25038	0.223208	-0.553268	-2.59033	-0.00771403	-0.746105	1.94268	-0.603933	-0.263105	3.11578	-0.00176588	2.05856	0.14987	-0.129472	-0.221859	-0.439893	0.409506	-2.89181	-0.023654	-2.10083	-2.47856	-0.0605911
Neural Progenitor Cell;NPK76-II-72-1;trt_cp;0.37 uM;24 h	-2.43113	0.0502895	-0.485869	-0.298854	-0.332996	-2.33094	-2.25062	-0.930968	-0.382516	-0.40607	2.84342	0.0150388	-0.428856	-0.153005	-0.0801896	0.254262	-0.233218	-0.14199	0.188954	0.00226084	0.575903	0.522007	0.334347	0.277847	-2.00605	0.0703532	0.0317178	0.992464	-0.162508	0.783472	-0.307295	0.349976	0.919163	-0.404382	0.354527	-0.307621	-0.457565	0.0286771	0.026055	2.4378	-2.92062	0.516284	-0.00673039	-0.0170748	0.722224
Neural Progenitor Cell;UNC-1215;trt_cp;0.37 uM;24 h	1.69467	2.49618	2.15636	2.63224	0.475441	-0.00408492	1.99663	-0.476739	0.422449	2.10771	0.178344	-0.137904	0.0193562	0.0782629	-0.178877	-0.387666	2.35462	0.371049	2.59875	0.164331	1.01702	3.16076	0.299637	2.56505	-0.158006	-0.22383	-2.36948	0.641065	-0.717173	2.61027	-0.568513	0.234175	3.31553	0.260871	2.69901	0.545096	-0.12302	0.181241	0.18074	2.87452	-2.64811	0.0282258	-2.28484	-2.51399	2.78048
Embryonic Stem Cell;GDC-0068;trt_cp;0.37 uM;24 h	0.014103	0.402343	0.118879	0.149721	0.506948	-0.0372959	-0.0194221	0.273628	0.332612	0.0482195	0.112752	-1.02184	-3.55898	-3.10105	-0.139754	-2.84815	0.00507862	-2.6405	-0.349503	-0.625152	-0.135581	0.274922	-3.14199	-2.89796	-2.53147	-0.113931	0.284683	-0.131432	-0.344684	0.534397	0.0754184	0.759553	-2.71617	-0.129727	-2.69793	2.87862	2.92987	-2.55475	2.41548	-0.149799	-4.06443	0.843609	-3.06959	-2.87459	-0.0495737
Neural Progenitor Cell;A-66;trt_cp;0.37 uM;24 h	2.43395	2.54389	2.38456	0.039995	2.29934	0.25369	0.718438	-0.481141	2.27471	0.364537	0.559318	0.458504	-0.00221153	-0.268154	0.189831	-0.0865492	0.251894	-0.197918	2.26285	2.61411	1.00859	2.76535	0.50277	0.485192	1.85571	-0.356097	-0.334944	1.18106	-0.45143	3.14408	-0.646286	-0.0999956	0.510124	0.070142	-0.0519285	-0.205889	-0.103171	-0.0295039	-0.342326	2.54195	-3.57209	-0.41505	-0.390497	-0.449704	0.146373
Neural Progenitor Cell;SB-525334;trt_cp;0.37 uM;24 h	-0.480944	-0.0445873	-0.243607	-0.382078	-0.395435	-0.365248	-0.470003	-2.16914	-0.284822	-0.211424	-0.131056	0.00478581	-0.676796	-2.92527	-0.604703	-0.00486811	-0.359549	-0.510101	-0.192533	-0.107535	0.456923	0.316976	0.0875862	-0.0486671	-2.52961	-0.504428	0.112703	0.57622	-0.750327	2.68351	-0.463488	0.47881	0.942975	-0.306254	-0.135741	-0.480901	-0.488627	-0.468357	-0.254056	0.231264	-3.74588	-0.0218848	-0.236871	-0.34338	0.249882
Neural Progenitor Cell;NVP-TAE226;trt_cp;0.37 uM;24 h	3.0491	2.81336	2.94697	2.19399	3.11603	0.908023	2.96159	-0.261265	3.07367	2.89793	2.368	0.822509	0.034419	0.0898001	0.38235	-0.0425247	0.428855	-0.103461	0.273052	2.52585	1.12821	2.6399	1.06126	0.55509	0.0615788	-0.0387828	-0.267425	0.948109	-0.495414	3.02213	-0.676478	0.000471069	0.48407	0.558197	0.44042	-0.229379	-0.379161	0.130431	-0.515694	0.686996	-3.52958	-0.592166	-2.90873	-0.464996	-0.178279
Neural Progenitor Cell;HG-14-10-04;trt_cp;0.37 uM;24 h	3.01782	2.85786	2.88842	2.13943	2.70104	2.34583	3.06243	-0.0824834	2.80742	2.44179	2.25808	0.571506	-0.125184	-0.0252075	0.242561	-0.227466	0.247477	-0.116188	-0.0380693	2.56713	1.06841	2.93186	1.08088	0.298623	-0.432663	-0.145016	-0.130654	1.07248	-0.533041	2.84922	-0.538037	-0.098585	0.523855	0.192028	0.470939	-0.252565	-0.508418	0.202666	-0.845303	2.59305	-3.59633	-0.659923	-2.98185	-2.98905	0.0360862
Embryonic Stem Cell;FR-180204;trt_cp;0.37 uM;24 h	0.168495	0.599339	0.289621	2.46951	2.88321	0.192705	0.0729894	0.247854	0.680887	0.347111	0.198726	-3.30358	-3.5113	-3.05323	0.121496	-2.74295	0.195817	-0.191184	-0.191466	-0.618946	0.0691368	0.316432	-3.17213	-2.75144	-2.17239	-0.103357	0.215622	2.31253	-0.303892	0.669347	-2.33184	0.651065	-2.63625	-0.0319227	-2.59041	2.95137	3.03866	-2.53198	2.65713	-0.070491	-3.9973	0.625326	-2.92447	-3.03735	0.118024
Epithelial Cell;sofalcone;trt_cp;0.37 uM;24 h	-2.64586	-1.96399	-2.04879	0.216112	-0.229272	-3.2119	-2.60296	-3.40839	-2.37815	-2.99153	-0.0298703	0.212248	-1.03495	2.3634	0.402717	-0.622771	2.09534	1.12724	-0.0594974	-0.496722	-2.87046	-2.90023	-0.178263	2.52483	-0.117844	-1.97841	-0.180382	-1.34986	-0.305688	2.79041	-0.156137	-0.0409653	-0.928862	3.15958	0.17418	0.0357954	0.382335	-0.390494	0.557708	-0.690763	-0.231433	0.226429	-0.449927	-0.230641	-0.741721
Neural Progenitor Cell;BRD-A92800748;trt_cp;0.37 uM;24 h	-2.26341	-0.0708032	0.00811298	-0.298772	-0.341778	-0.408643	-2.21313	-0.553579	-0.384955	-0.00240344	0.310243	0.0587492	-0.242624	-0.279789	0.109056	-0.327397	-0.164532	0.151001	2.26226	-0.0701959	0.867683	2.87346	0.235597	0.540641	-2.11514	0.0795027	-0.0591158	0.572001	-0.274894	2.56111	-0.432574	0.3288	3.09617	-0.138995	0.416144	0.189039	0.140181	-0.186624	-0.119696	0.151483	-2.96738	0.552375	0.0795013	0.199178	2.98068
Neural Progenitor Cell;AST-1306;trt_cp;0.37 uM;24 h	0.0113874	0.316985	0.448336	-0.178669	0.145532	0.0662424	1.88915	-0.480031	0.228165	0.00719048	2.52648	0.132539	-0.292156	-2.37686	0.131012	2.08033	2.27774	0.063076	-2.142	0.155256	0.720308	3.06289	0.33185	0.509443	-0.116229	-0.506823	-0.517453	0.62107	-0.471248	2.6879	-0.593592	0.127807	0.0655034	-0.325701	0.0347793	-0.533607	-0.375237	0.203572	-2.34725	2.3039	-3.88411	-2.85977	-2.67198	-3.00082	-2.29552
Neural Progenitor Cell;NVP-BHG712;trt_cp;0.37 uM;24 h	-1.92877	2.31898	0.46197	2.4142	0.0460061	-0.125327	2.18542	-2.30101	-0.163242	0.146849	-0.0244893	0.364426	0.0555104	0.223138	0.182257	1.91065	-0.107441	0.172803	-0.0638796	0.136807	1.24022	3.03969	0.518116	2.54972	0.0847826	-0.554837	-0.411905	0.590403	-0.441853	2.59651	-0.716292	0.372519	3.58145	-0.0187235	2.15869	-0.153277	-0.631528	-2.37195	-0.0360981	2.22112	-2.84974	0.182819	-2.48502	-2.44608	2.65059
Neural Progenitor Cell;XMD-892;trt_cp;0.37 uM;24 h	-2.09125	2.35467	0.379298	-0.128119	-0.00170578	-2.23055	-0.179846	-0.610242	-0.125765	0.457652	2.78724	0.480347	0.234997	0.431945	2.95277	2.79783	-2.03709	-0.14784	0.230902	2.30645	0.941122	3.20598	0.706757	2.48779	0.0251809	-0.0976438	-0.702568	0.914049	-0.394748	0.788011	-0.234387	0.0340275	3.13152	-0.230742	2.55948	-0.195025	-0.91544	-0.0390779	-0.525814	2.43154	-2.63079	-0.0307434	-2.13261	-2.51374	0.729785
Neural Progenitor Cell;sunitinib;trt_cp;0.37 uM;24 h	0.569511	0.380456	0.730147	-0.143669	0.440018	0.0214509	0.190623	-2.12045	-0.0377451	0.204542	0.1036	0.684489	0.107217	-1.98507	0.0887409	1.89924	0.163882	-0.214344	0.334859	2.74679	1.05795	2.70538	0.424406	2.95901	0.178277	-0.373014	-0.115032	0.457403	-0.420995	2.99267	-0.627634	-0.0435207	2.64623	0.0634425	-2.47858	-3.01582	-0.795994	-3.05193	-0.506214	-0.0550747	-4.09627	-0.418378	-2.11554	-3.0698	0.0205969
Neural Progenitor Cell;KW-2449;trt_cp;0.37 uM;24 h	1.99194	2.29819	2.17961	-0.127903	0.185902	-0.213395	0.467771	1.98117	0.309972	0.428387	0.195946	-0.107595	-0.129279	-2.20943	-0.0302645	0.322554	0.173059	0.0105459	-0.178659	2.07501	0.963607	2.69985	-0.0232998	2.63521	0.169912	-0.733804	-0.455167	0.478116	-0.580133	2.34409	-1.02954	0.0164106	2.55563	0.0115161	-0.0532488	-0.652039	-0.488942	-2.41345	-0.590381	2.35506	-3.60505	-2.64505	0.181098	-2.7701	2.40932
Embryonic Stem Cell;rebastinib;trt_cp;0.37 uM;24 h	-0.0788809	0.314592	0.103206	2.42007	2.79824	2.18131	0.0677779	-0.0415479	2.386	2.10903	2.45085	-3.31629	-3.38629	-2.70542	-0.0985491	-2.9757	0.0196381	0.303412	-2.74971	-0.554192	-0.0698476	0.37847	-3.23468	-2.81096	-0.3525	-0.224497	0.347076	-0.157718	-2.34984	0.77548	-0.0340998	0.754453	-2.8505	-0.199448	-2.61728	0.418213	3.1578	-2.36092	2.92672	-0.149567	-4.2741	0.0874993	-3.55553	-2.99082	-0.450528
Embryonic Stem Cell;OSI-930;trt_cp;0.37 uM;24 h	0.18951	0.470079	0.273252	0.276194	0.63095	0.0634619	0.173456	0.148652	0.480581	0.230149	0.0102404	-3.2815	-3.50951	-3.14116	0.0310775	-2.80937	0.0129747	0.0251664	-0.252031	-0.486296	0.0268477	0.330115	-3.20427	-2.67967	-2.33255	-0.100399	0.320008	0.011455	-0.385512	0.34521	0.149284	0.94938	-2.92	-0.0497219	-2.2952	3.14551	2.95854	-2.79099	0.959899	-0.170485	-3.99624	2.28848	-2.41666	-2.86193	-0.13423
Neural Progenitor Cell;alectinib;trt_cp;0.37 uM;24 h	-1.9388	2.1164	0.233507	-0.0623896	-0.100302	-2.09768	-0.0392098	-2.19526	-0.326609	0.334807	0.232252	0.455298	0.109451	0.0714387	0.359722	0.193022	-0.0427915	-0.0299666	2.45573	2.40077	1.04904	3.02818	0.477377	2.52739	0.782708	-0.256872	-0.332714	0.613893	-0.547929	2.69253	-0.262884	0.138285	3.80895	-0.190187	0.716965	0.302283	-0.075661	0.183561	-0.292873	2.55225	-0.436373	0.525632	0.0371633	0.522837	2.54413
Neural Progenitor Cell;BIX-02189;trt_cp;0.37 uM;24 h	2.24138	2.44886	1.0288	0.434345	0.775259	0.0645711	0.505209	-0.463684	0.905198	0.807666	0.129449	-0.176721	-0.00309651	-0.220346	0.401061	-1.84349	3.09133	0.103566	2.39411	2.42773	1.46054	3.31304	0.757817	2.84328	-0.332396	-0.48961	-0.379919	0.958494	-0.680443	2.77741	-0.430519	0.0782365	1.14585	0.60768	-2.10288	-0.0966568	-0.615478	-2.41484	-0.00360315	0.0358569	-3.846	-0.120734	-2.65609	-2.95343	0.281443
Neural Progenitor Cell;PF-04217903;trt_cp;0.37 uM;24 h	0.375171	0.437209	0.532772	0.206539	0.417588	-0.0540653	0.151123	-1.86485	0.142391	0.335155	-0.0187174	-0.14275	-0.358505	-2.37956	-0.277859	-0.174232	0.147563	-0.274979	0.00352336	0.120922	0.833323	2.89881	0.410922	2.46974	-0.296615	-0.513087	-0.364268	0.856388	-0.481034	2.64684	-0.60722	0.410857	0.609081	0.479404	-0.0891172	-0.121769	-0.581108	-2.73201	-0.61184	2.23903	-3.68766	0.165457	-2.28934	-2.82076	0.287704
Neural Progenitor Cell;garcinol;trt_cp;0.37 uM;24 h	-2.05004	0.295854	-0.200184	-0.149446	-0.131274	-2.3787	0.131909	-0.775891	-0.15197	0.0498511	2.70031	-0.0663191	-0.241352	-0.215499	0.130858	2.01794	-0.242604	-0.17495	0.381816	-0.123741	0.765578	0.599262	0.338352	0.255124	-2.00783	-0.0333039	-0.167016	1.04573	-0.498785	2.47669	-0.537802	0.318495	3.16051	-0.319458	0.584179	0.201492	-0.387498	0.209488	0.204509	2.60012	-0.479007	0.795238	-0.00102416	0.251192	2.9141
Neural Progenitor Cell;PHA-767491;trt_cp;0.37 uM;24 h	0.39393	0.653448	0.331973	0.0453433	0.311481	0.0153379	-0.0225118	-2.04011	0.236765	0.341016	-0.312194	-0.254973	-2.9557	-2.40789	-0.108846	-2.16455	0.605177	-0.0754631	2.33577	2.4623	1.19288	2.95965	0.602089	2.81314	-2.13942	-2.10556	-0.326438	0.663121	-0.825638	2.61798	-0.33528	0.217577	0.830073	0.844871	-1.96871	-0.0284877	-0.619375	-2.68236	-0.106528	0.225965	-3.51081	0.531154	-2.58293	-2.6033	-0.34434
Neural Progenitor Cell;pazopanib;trt_cp;0.37 uM;24 h	-0.582561	-0.274429	-0.479469	-2.7708	-0.35697	-0.255207	-0.391312	-2.12588	-0.396133	-0.342272	-0.121905	-0.0769067	-3.41935	-3.21865	-0.517607	-2.10646	-0.314124	-0.333418	-2.42212	-0.329186	0.303047	0.364354	0.158685	-0.149251	-2.37877	-0.556466	0.103183	0.966893	-0.41568	2.54711	-0.467687	0.459844	0.110156	-2.39936	-0.119057	-0.320435	-0.402032	-0.130279	-0.201723	2.75476	-3.75991	0.0967003	-2.77584	-2.92764	0.0398976
Neural Progenitor Cell;VX-745;trt_cp;0.37 uM;24 h	-0.426331	2.38765	1.88144	2.30868	1.83877	-2.04386	-0.1219	-0.738288	0.324408	2.054	0.24638	0.150347	2.42812	2.59728	2.38513	-0.221754	2.16281	0.621609	2.89253	2.54798	3.52269	3.39723	2.86255	2.77808	0.287731	-0.287396	-2.21998	0.2203	-0.562678	2.45774	-0.52686	-0.0550392	3.43123	0.0619736	2.36592	0.310873	0.0317929	-0.0656466	-0.0988611	2.47566	-3.05149	-0.664915	-2.1656	-2.33449	-0.0228508
Neural Progenitor Cell;saracatinib;trt_cp;0.37 uM;24 h	2.56775	2.88487	2.83885	2.52361	2.75523	2.5301	2.78385	-1.90944	2.74019	2.99968	0.534571	0.683492	2.69114	3.12031	3.08354	0.214704	2.86573	0.132556	3.37233	3.23257	4.09995	3.76571	3.53655	3.45658	0.14925	-1.83897	-2.98095	0.77803	-0.897542	-0.282687	-0.533634	-0.321357	0.847035	1.12061	2.8741	0.412347	-0.181079	0.144348	-0.346033	2.64458	-2.38391	-2.17309	-0.0221512	-2.45729	-2.49829
Neural Progenitor Cell;HG-9-91-01;trt_cp;0.37 uM;24 h	2.27022	2.25035	2.13991	-0.147251	1.9528	0.367274	0.598506	-0.599241	-0.00765018	0.336872	0.0952014	0.659613	-2.64182	-0.273868	-2.11507	-0.637355	2.46244	2.32864	-0.399161	-2.05996	0.986447	2.76873	2.86112	0.343862	-2.13933	-2.13953	-2.26692	0.997617	-2.84009	2.91358	-2.62021	-0.307519	0.195637	2.04124	-2.27666	-2.72065	-3.26775	-0.361843	-0.177489	0.42974	-3.88002	-2.52812	-3.32262	-3.06211	-3.01811
Embryonic Stem Cell;bosutinib;trt_cp;0.37 uM;24 h	0.202499	0.442639	0.291082	0.270566	0.768463	0.116349	0.1335	0.146916	0.484452	0.30486	-0.0429398	-0.990739	-3.52198	-3.07927	0.0505553	-2.72192	-0.0525567	-2.42788	-0.27562	-0.58393	0.0161474	0.213812	-2.98238	-2.7123	-2.60745	-0.0691715	0.425408	2.55612	-0.419609	0.636991	0.187303	0.811835	-2.7829	0.0164646	-2.61359	2.94295	3.08618	-2.65992	2.583	-0.153214	-3.94074	2.40224	-2.84031	-2.75397	-0.0845321
Neural Progenitor Cell;GSK-1070916;trt_cp;0.37 uM;24 h	-0.0808864	0.129031	-0.435978	-0.168415	-0.100239	-0.449133	0.0802214	2.23584	0.21643	0.223071	0.280105	-0.302818	-0.558708	-0.56831	0.0181854	-0.109816	-0.446671	-0.599715	-0.140683	-0.460702	0.360906	-0.0893609	-0.183153	-0.0576792	-0.228589	0.047109	0.288185	1.08935	-0.361916	0.851249	-0.339026	0.711042	0.847504	0.15935	1.05454	0.49246	0.188652	-0.132025	-0.284418	0.849374	0.107919	1.05439	0.63941	0.00624973	3.17503
Neural Progenitor Cell;motesanib;trt_cp;0.37 uM;24 h	0.476639	0.533435	0.4381	0.087978	0.274196	0.0255322	0.365995	-1.91788	0.13843	0.384013	2.30891	-0.0511163	-0.226199	-2.34645	-0.0690132	1.73232	0.268229	-0.14912	2.03069	0.276809	1.08884	2.75132	0.680224	0.34715	-1.94165	-0.380397	-0.24394	0.98086	-0.670712	2.77192	-0.583424	0.155426	0.772005	-0.00357433	-2.4067	-0.267026	-0.400217	-2.3142	-0.419119	2.64952	-3.91718	-0.390866	-3.00438	-2.79176	-2.27726
Neural Progenitor Cell;CG-930;trt_cp;0.37 uM;24 h	-0.857137	0.113558	-0.471695	-0.393325	-2.07012	-0.637617	-0.36025	-0.333821	-1.93502	-0.372292	2.92097	0.610988	0.0468766	0.26052	2.46849	-0.0109354	2.38755	0.474546	0.194175	2.47709	3.03099	3.22909	0.159303	2.42942	0.504421	-0.145319	-0.632033	0.152467	-0.515581	2.48186	-0.309129	-0.230577	2.86564	-0.239484	-2.14166	-0.380195	-0.520498	-2.32125	-0.726286	0.172857	-3.45088	-2.1951	-2.38831	-3.04129	2.46314
Embryonic Stem Cell;vandetanib;trt_cp;0.37 uM;24 h	0.00737677	0.29791	0.166999	0.327485	0.516483	-0.151152	0.185903	0.0495176	0.469227	0.0316642	-0.121525	-3.59655	-3.61895	-3.31794	-0.298539	-2.84445	-0.259913	-2.61525	-0.508605	-3.12756	-0.123643	0.211904	-3.30744	-2.541	-2.86242	-0.0428515	0.590098	0.256938	-2.33148	0.51356	0.0909398	1.00115	-3.13964	-0.215053	-2.28651	2.96467	3.11437	-2.87782	2.68081	-2.4358	-3.94522	2.68011	-2.77348	-2.71857	-0.0224067
Neural Progenitor Cell;WZ-4002;trt_cp;0.37 uM;24 h	2.06978	2.20573	0.644456	0.288701	0.432893	0.324254	0.62957	-0.195046	0.389755	0.525285	2.54244	0.689463	-0.170175	-0.428661	0.195426	0.142882	-0.343083	-0.480596	-2.16281	-0.0262527	0.756642	0.43909	0.458699	0.324925	-2.3719	-0.384513	-0.392205	0.965495	-0.447481	2.5189	-0.662097	0.0315066	0.684095	0.014421	0.0973283	-0.576831	-0.566799	-0.156226	-0.2079	2.37891	-3.52352	-0.105524	-2.41427	-2.60008	0.38107
Neural Progenitor Cell;IOX2;trt_cp;0.37 uM;24 h	-0.192468	2.30324	1.9987	-0.224248	-2.23181	-0.108168	-0.290475	0.0521354	-1.56605	1.99789	0.429692	0.0489386	0.323967	2.51908	2.41173	-0.34217	2.58858	0.463109	0.179922	0.412422	3.05819	3.18824	0.152033	2.90093	0.28382	-0.363412	-2.53629	0.342203	-0.703394	2.18212	-0.362538	-0.0601729	2.92656	0.00468919	2.43537	0.136497	-0.0928848	-2.43247	-0.199638	2.63731	-2.50986	0.0679736	0.0589488	-2.60041	2.95315
HSC;dasatinib;trt_cp;0.37 uM;24 h	-0.307145	-0.225792	-0.482351	-3.04501	-3.09773	-1.93524	0.217087	-0.721614	-0.613925	0.0776967	-2.56581	2.8719	-3.02762	-2.47597	-0.206202	2.09148	-1.16021	-0.623442	-0.61557	-0.530865	-0.344897	-0.421883	0.231883	-2.70869	-0.463015	0.888384	0.741537	1.62569	-0.085719	0.362645	0.330514	2.75269	0.482882	-1.78502	0.25235	-0.214176	-0.927873	3.07428	0.463188	3.34486	-0.0359343	1.01099	-3.62109	0.7732	0.586267
Neural Progenitor Cell;EX-527;trt_cp;0.37 uM;24 h	-2.16746	0.040456	-2.00054	-2.32072	-2.35299	-2.35131	-2.22233	-0.609698	-0.551895	-0.169352	0.281731	0.177069	-0.590223	-0.479394	-0.281347	-0.26755	-0.455178	-0.147319	-2.36222	-0.460353	0.597412	0.285049	0.22697	0.11458	-2.06688	-0.538333	-0.206673	1.01297	-0.656145	2.66927	-0.626726	0.324029	3.31052	-0.188588	0.719421	-0.0509624	-0.18592	0.298146	-0.0743973	2.93691	-0.338318	0.566952	-0.344793	0.323857	3.05666
Neural Progenitor Cell;AGK-2;trt_cp;0.37 uM;24 h	2.4802	3.05029	2.63873	2.88958	2.85755	2.10474	3.03167	-0.376656	2.77555	2.90686	2.16183	0.5549	0.00914936	0.0552131	0.277428	-0.439986	0.0724469	-0.110761	0.715198	2.32061	1.40054	0.557962	0.817062	0.190976	-0.242922	-0.472269	-0.723852	1.28448	-0.598249	1.05301	-0.833385	0.0350906	3.19737	0.270741	2.95852	0.480098	-0.433398	0.695939	0.247331	3.01707	0.117961	0.0831301	-0.60119	0.456272	3.19215
Neural Progenitor Cell;MGCD-265;trt_cp;0.37 uM;24 h	-0.292836	0.285834	1.8748	0.152296	-0.522281	-0.321489	-0.0916903	-0.37989	-1.68666	1.83214	2.78597	0.733816	0.372526	0.523843	0.631926	0.6549	0.139839	0.0417729	0.175179	2.32724	0.965771	3.06004	0.538836	2.55727	0.305632	-0.187868	-0.568699	0.371066	-0.2344	2.30239	-0.143993	0.0683942	3.46039	-0.533455	2.595	-0.0647856	-0.556855	-0.0240786	-0.352254	2.18301	-2.30476	-0.329831	0.219913	0.241128	2.66754
Neural Progenitor Cell;I-BET-151;trt_cp;0.37 uM;24 h	-2.82905	-0.509057	-2.34809	-0.764636	-3.1662	-0.932396	-0.565906	-0.51574	-2.88668	-2.31798	3.20619	0.552856	-0.120829	-0.0627081	2.6995	0.335133	-2.19294	2.68778	-0.0565287	0.196567	-2.79111	0.544638	-3.19154	-1.88123	0.156996	0.394991	0.076917	-2.74252	-0.515717	2.53784	-0.102286	-0.0880444	2.20849	-2.88302	-2.29851	-0.00802794	-0.0326844	-2.54588	-3.17724	2.93861	-3.9606	0.46352	0.203066	-3.2556	2.45535
Embryonic Stem Cell;tivozanib;trt_cp;0.37 uM;24 h	0.278934	0.505743	0.391489	0.235471	0.771305	0.24707	0.238137	2.41911	0.59981	0.455966	0.0433809	-0.95696	-3.44892	-3.05474	0.125928	-2.74733	0.233112	-2.41942	-0.193186	-0.537319	0.154304	0.242569	-2.90245	-2.70736	-2.13244	0.0894551	0.44472	2.52169	-2.48738	0.710569	-2.12619	0.711016	-2.42292	2.32755	-2.36385	2.74299	3.07696	-2.78002	0.632801	0.138832	-3.97016	2.27945	-2.89153	-2.89489	-0.0109443
Neural Progenitor Cell;KIN001-269;trt_cp;0.37 uM;24 h	-1.87866	2.07878	-1.86166	-0.178562	-2.63791	-2.09953	-0.393457	-0.214481	-2.12333	-0.138193	2.86938	-0.0165071	-0.0999641	0.211375	0.296313	0.0930781	2.36087	0.143197	0.0387855	2.60273	0.976992	3.38358	0.417414	2.64636	0.193837	-0.0457043	-2.30478	0.411785	-0.447712	2.29921	-0.00173705	0.0669034	2.8838	-0.0391574	2.38845	0.0285521	-0.288008	0.0112238	-0.308468	2.78104	-2.77011	0.230703	0.153722	-2.55073	-0.22602
Neural Progenitor Cell;VE-821;trt_cp;0.37 uM;24 h	-0.874368	1.95481	-1.96228	-0.322882	-0.177742	-2.59477	-0.577989	-0.814485	-2.56703	-2.19272	0.421063	0.0204557	0.334394	2.65078	0.180287	-0.00225925	2.40555	0.80766	2.48164	0.215163	3.63119	3.40907	0.568411	0.788358	-2.08663	0.264335	-0.567384	0.418683	-0.358218	2.55344	-0.718216	-0.0459948	3.25801	-0.205879	2.02408	-0.170298	-0.474535	-2.26637	0.506538	-0.223453	-2.97463	-1.61101	-2.89205	-2.1471	0.305788
Embryonic Stem Cell;BMS-509744;trt_cp;0.37 uM;24 h	-0.0730723	0.419393	0.0842098	0.427761	0.651741	-0.222215	0.107402	0.0372748	0.449956	0.0909317	-0.0809204	-3.69233	-3.62141	-3.39257	-0.305752	-2.82358	-0.303015	-2.51075	-0.53582	-3.2299	-0.313981	0.00639612	-3.28838	-1.11974	-2.56052	-0.134221	0.524919	0.0131656	-0.177765	0.586227	-0.0565474	1.03516	-2.90524	-0.30649	-2.46835	3.07146	3.2265	-2.5188	2.841	-0.211236	-4.02184	1.12267	-2.8044	-2.6393	0.176447
Neural Progenitor Cell;MC1568;trt_cp;0.37 uM;24 h	-0.251677	2.34712	2.12083	-0.154249	-2.49898	-2.28089	-0.263288	-0.458922	-2.0576	-0.0112254	2.72474	0.0563086	0.362296	2.69035	2.52402	0.210529	2.32694	0.375253	2.9484	2.64259	3.45186	3.46922	0.727645	2.72968	0.0544914	0.211011	-2.20924	0.421065	-0.400128	2.46758	-0.367433	0.18253	3.54547	-0.160792	2.53547	0.170181	-0.26248	-2.28792	-0.161631	2.76473	-2.31836	1.92326	2.0629	0.088057	2.50652
Neural Progenitor Cell;AZD-1480;trt_cp;0.37 uM;24 h	-0.186737	2.39434	1.86369	2.24701	-0.567603	-0.606308	-0.0637069	-0.868068	0.388086	1.85858	2.42556	0.241326	0.532652	2.47315	0.37972	0.0542036	2.11088	0.371164	0.104002	2.19946	3.32987	3.20232	0.435967	2.30543	0.3431	-1.99941	-2.274	0.370858	-0.390792	2.3737	-0.519373	0.380058	3.38852	-0.513361	2.77109	0.0732809	-0.160126	2.24211	0.497025	2.22788	-2.41054	-2.41602	-0.114619	0.229367	3.05589
Neural Progenitor Cell;BRD-K55591206;trt_cp;0.37 uM;24 h	-0.586712	2.11209	0.572362	-0.248873	-2.31652	-2.05311	-0.449547	-0.676543	-0.0442201	1.7327	2.4768	0.173987	0.321355	2.50053	2.59562	0.0519295	2.15696	0.321584	2.49743	2.49037	3.318	3.56609	0.385987	2.53683	0.283959	-0.157117	-2.26842	0.287875	-0.30509	2.25644	-0.565154	0.191963	3.04719	-0.166593	0.0494299	-0.032717	-0.292677	-2.09512	-0.201542	2.23537	-2.99245	-2.27897	0.0867539	-2.43655	2.56536
Neural Progenitor Cell;BRD-K29983336;trt_cp;0.37 uM;24 h	-1.80751	1.99182	0.480568	-0.403109	-0.0941852	-0.350725	-0.478877	-0.524481	-1.96151	1.79126	0.503079	-0.0543717	-0.319757	0.369536	2.50388	-0.281747	3.01829	0.303574	0.30635	0.544313	3.3502	3.44132	2.57297	3.01421	0.388077	-0.297123	-2.71155	-0.0884733	-0.784598	2.50061	-0.422395	-0.271692	2.62597	0.38944	-0.0723935	-0.224721	-0.308904	-2.5147	-0.495965	0.293217	-3.26711	-0.4303	-0.335689	-2.83919	0.0150223
Embryonic Stem Cell;KIN001-266;trt_cp;0.37 uM;24 h	-0.00462432	0.354746	0.0333745	0.14587	0.568878	-0.0223985	0.0775525	0.166944	0.385291	0.105849	0.0253137	-3.44508	-3.59343	-3.20279	-0.0136247	-2.76853	-0.0916841	-2.50086	-0.129517	-0.666148	-0.0407073	0.254073	-3.16498	-2.66337	-2.69336	-0.169542	0.343862	2.46297	-2.45305	0.453827	0.0448179	0.822198	-2.73524	-0.128914	-2.36423	3.17956	3.12076	-2.79642	2.60248	-0.0102576	-3.87927	1.07816	-2.47193	-2.74433	-0.0071919
Neural Progenitor Cell;MLN-0128;trt_cp;0.37 uM;24 h	2.84844	2.88111	2.5756	2.25196	2.26745	2.155	2.78728	-0.148064	2.83121	2.76127	2.39496	0.986051	0.0540221	0.291738	0.231769	2.36676	0.272777	-0.294667	2.07656	2.77101	0.866211	2.2545	0.589693	2.5485	0.630563	0.159645	-0.177618	0.995223	-0.511172	0.947817	-0.342135	0.271199	0.496274	-0.0950413	0.935585	0.0926463	-0.0627683	0.373325	-3.2816	2.56454	-0.266952	-0.0704616	-0.0210958	-0.178399	1.06945
Embryonic Stem Cell;KIN001-244;trt_cp;0.37 uM;24 h	0.0536635	0.281325	0.00458195	0.0835817	0.553821	0.050839	-0.0336588	0.299923	0.30457	0.228071	0.141926	-3.44291	-3.4782	-3.08705	0.139074	-2.72053	0.0665865	-2.6069	-0.136721	-0.365173	-0.137157	0.152995	-3.21701	-2.83247	-2.37845	-0.201177	0.240889	2.55822	-0.262135	3.18307	-2.2105	0.827284	-2.59047	-0.113762	-2.42122	3.20513	3.12534	-0.465187	2.61096	2.4898	-3.89538	2.48533	-2.54562	-2.77019	0.0246931
Kidney Cell;doxofylline;trt_cp;0.37 uM;24 h	-0.842956	-0.55394	-0.86606	-0.43036	-0.53645	-0.41224	-0.920751	-0.35601	-0.338602	-0.564685	0.545297	-0.174922	-0.499152	-0.0845207	-0.585735	-2.7369	0.846527	0.280081	-0.752311	-0.0558402	-0.958238	0.0227392	-1.07199	-2.70671	0.601915	-0.179829	-0.541958	-1.04542	-0.122518	-0.472116	2.93281	-1.55727	-0.535014	-0.685562	-0.674795	0.396255	0.504864	-0.0154739	0.172569	-0.351996	-3.52307	-0.85949	-0.107447	-3.28559	-1.09258
Kidney Cell;fulvestrant;trt_cp;0.37 uM;24 h	2.72173	2.35538	0.273553	-0.152861	2.6612	2.97483	0.400735	0.00558681	0.496908	2.83109	0.0470737	-0.557178	0.503657	0.562052	2.74771	-0.473638	3.40986	0.03063	-2.34716	-2.50312	0.68495	0.0351531	3.54931	-2.3143	-2.06746	1.79081	-0.384031	3.62766	2.9002	-0.226294	0.859384	-2.88656	-3.06823	2.68803	-0.499522	2.49248	3.00062	3.2724	2.30721	0.336818	0.136102	0.532208	-2.49204	-2.18015	-0.679023
Embryonic Stem Cell;HG-9-91-01;trt_cp;0.37 uM;24 h	0.109687	0.602281	0.189575	0.445707	0.751465	-0.026502	0.119201	0.0539198	0.573779	0.26713	0.106112	-3.55807	-3.62653	-3.32152	-0.0955991	-2.87137	0.098591	-2.38974	-0.446723	-0.695552	-0.036099	0.137562	-3.2343	-1.09332	-2.53839	-0.185267	0.331363	2.39543	-2.37524	0.558814	-0.0411014	0.672185	-2.75277	-0.0138312	-2.28688	3.1295	2.94297	-2.57758	2.63213	-0.120958	-3.98966	2.49693	-2.89782	-2.6995	-0.104511
Neural Progenitor Cell;rigosertib;trt_cp;0.37 uM;24 h	2.20824	2.20348	1.88441	0.0661349	0.260449	1.91112	-0.202568	2.25411	0.255179	2.41096	0.726395	0.146866	0.601808	0.296309	2.88997	0.417335	0.339026	-0.385638	0.350704	2.60711	0.896573	2.44443	-0.389094	3.12364	2.34043	-0.08178	-0.610671	0.185548	-0.553786	-0.0143842	-0.164102	-0.144915	2.83431	-0.0517299	0.87324	0.692514	0.103312	-0.86448	-0.68507	0.658236	0.942754	0.0947362	2.92747	0.323105	3.33101
Embryonic Stem Cell;SAR-245409;trt_cp;0.37 uM;24 h	0.0796609	0.533738	0.223291	0.323475	0.605892	0.0111805	0.0785115	0.205755	0.471547	0.161766	0.047708	-3.60674	-3.64908	-3.33847	-0.117591	-2.66776	-0.0143431	-2.56328	-0.330622	-0.608515	-0.128274	0.125853	-3.30614	-2.84501	-2.32349	0.0982385	0.518426	0.0215357	-0.324213	0.556084	-2.4256	0.893103	-2.81581	-0.28612	-0.0474556	3.29993	3.20191	-0.500144	0.843564	0.114246	-3.7887	0.946158	-2.60484	-2.75132	0.0572928
Embryonic Stem Cell;doramapimod;trt_cp;0.37 uM;24 h	-0.151766	0.270214	-0.0614677	-0.000723478	0.413547	-0.136431	-0.0377691	-0.0547233	0.240803	-0.00628229	0.122344	-3.41875	-3.57577	-3.16294	-0.0391117	-2.7201	-0.157872	-2.64886	-2.5498	-0.702895	-0.162527	0.280332	-3.20218	-2.84116	-2.69705	-0.205064	0.390184	2.38425	-0.348197	0.586268	-0.0445379	0.934979	-2.82235	-0.325952	-2.62359	3.00804	2.95179	-2.62764	2.58211	-0.159167	-4.04346	0.907011	-3.01708	-2.75493	0.00127609
Epithelial Cell;BRD-K57926513;trt_cp;0.37 uM;24 h	2.77702	2.87668	2.51453	2.87353	3.44649	2.69232	2.77275	1.95449	3.17342	2.50363	0.280897	-0.278086	3.10825	0.0917812	-2.78636	-0.0302345	0.579279	-0.273168	3.34691	2.93123	3.56729	3.05166	0.45553	2.5548	3.13774	-1.73456	-2.17541	1.65717	0.0422101	-0.494541	-2.33869	-2.59497	2.64769	-0.193575	0.753869	-0.151384	-0.00403726	0.0439501	0.0623936	0.606189	0.766307	-2.97675	2.92326	-0.278967	0.608584
Embryonic Stem Cell;PF-04217903;trt_cp;0.37 uM;24 h	0.21542	0.586195	0.263613	0.410392	0.661397	0.000780402	0.12485	0.273068	0.531902	0.279279	0.063175	-3.26653	-3.59891	-3.26454	-0.0293983	-2.69991	0.137264	-0.357528	-0.0977506	-0.416126	0.208416	0.376651	-3.03114	-2.64345	-0.165928	-0.107909	0.305962	2.49009	-2.4385	0.49336	-2.28235	0.62972	-2.63526	-0.12257	-2.42808	2.97571	2.82441	-2.49681	0.897624	-0.102629	-4.07783	0.719372	-2.83935	-2.71122	0.19437
Neural Progenitor Cell;GNF-2;trt_cp;0.37 uM;24 h	-0.321624	0.248079	-0.262717	-0.157965	-2.39309	-2.02343	-0.290133	-0.386965	-1.71863	-0.00210464	2.7314	-0.043693	0.512074	2.75094	2.67092	0.374629	2.68607	0.112651	0.584611	2.93161	3.42936	3.6864	0.730452	3.15661	0.333957	-0.0967762	-2.64382	0.293086	-0.708482	2.3015	-0.488074	0.00735241	3.05549	0.317002	2.13556	0.0730645	-0.567103	-2.4456	-0.624491	0.274869	-2.83609	-0.254178	-0.0855762	-2.62269	-0.211656
Embryonic Stem Cell;cabozantinib;trt_cp;0.37 uM;24 h	0.232302	0.5897	0.354437	0.40319	0.680689	0.0824618	0.229952	2.31269	0.497827	0.253453	0.166819	-3.40328	-3.65503	-3.1846	2.46122	-2.70327	0.00873328	0.074695	-0.165825	-0.456508	-0.0320474	0.398358	-3.24454	-2.6629	-2.40186	-0.0570895	0.403725	-0.171437	-2.34761	0.423259	-0.0353267	0.813353	-2.66101	-0.0060663	-2.14452	3.07096	3.10625	-2.85111	0.839363	-0.0512487	-4.01906	2.43961	-2.54734	-2.97252	-0.264351
Embryonic Stem Cell;TPCA-1;trt_cp;0.37 uM;24 h	-0.136763	0.289889	-0.0430087	0.211229	0.441446	-0.138724	-0.0274194	0.0451741	0.331508	-0.030781	-0.0550126	-3.25826	-3.62575	-3.34002	-0.245791	-2.71875	0.0174915	-0.45654	-0.254497	-0.607751	-0.152238	0.190981	-3.2432	-2.73692	-2.6812	0.00554429	0.353913	2.52337	-2.3596	0.633231	-2.23863	0.908214	-2.55608	-0.285485	-2.25864	3.18708	3.15789	-2.69986	0.824609	0.0122145	-3.75661	1.13229	-2.55469	-2.64368	0.026202
Neural Progenitor Cell;amuvatinib;trt_cp;0.37 uM;24 h	0.279855	0.221575	0.251375	-0.11812	0.421317	0.107473	0.153386	-1.64947	0.316846	0.267051	0.15937	0.11603	-0.0126274	-2.42369	0.394339	0.32016	0.391304	-0.230038	2.15663	0.283777	0.789038	2.75675	0.432465	0.919631	-0.0440003	-0.0722113	-0.45282	1.11083	-0.32968	2.64854	-0.988955	0.273649	0.434859	-0.198225	-0.14857	-0.206029	-0.271064	-0.424704	-0.0452723	2.50016	-3.62375	-0.0292266	-0.0819662	-2.89691	0.712234
Neural Progenitor Cell;KIN001-127;trt_cp;0.37 uM;24 h	-2.17196	0.112418	-0.030609	-0.0649539	-0.614228	-0.367643	-0.0988392	-0.627898	-0.406866	0.0115889	2.73502	0.0809435	-0.158933	-0.0510949	0.204204	-0.0997778	0.024187	-0.0353443	2.25977	-2.3477	0.852824	0.642752	0.210908	0.588531	-1.83166	0.0830718	-0.0769294	0.639308	-0.314687	2.65128	-0.180043	0.221709	3.13278	-0.223305	0.163954	-0.203361	-0.249429	-2.396	-0.255308	0.148441	-2.79454	0.648113	-0.0367251	0.07105	2.52553
Epithelial Cell;dolutegravir;trt_cp;0.37 uM;24 h	-3.4929	-3.47621	-3.59594	-2.92203	-3.28647	-3.01462	-3.52265	-0.486006	-3.52059	-3.37548	-1.1132	-0.718354	-3.64427	-1.32724	-2.76211	-2.51474	-3.28124	-0.0725872	-3.31158	-1.08916	-4.34169	-0.985386	-3.57139	-3.17482	0.0457649	0.0756117	0.896974	-3.18078	0.0420852	-2.12132	1.89082	1.01613	-2.44089	-3.36845	0.804332	-0.744168	-0.283189	0.487679	0.542599	-2.91635	0.855885	0.0499958	-0.12586	1.07199	-2.3142
Epithelial Cell;BRD-A11087911;trt_cp;0.37 uM;24 h	3.42556	0.876787	3.19656	0.17937	3.39691	2.86562	0.655582	-3.04102	3.25731	3.2619	0.54041	2.58427	3.65136	1.17748	3.00074	0.196552	3.84292	2.87381	0.283736	0.560229	3.84557	0.0962576	3.15282	2.89055	0.0308879	0.885188	-2.34569	0.563577	0.106973	2.59474	0.621068	-1.82959	0.661799	1.59366	-2.92701	0.354983	-2.94714	0.218413	-0.404457	0.000958654	-2.78679	-0.440296	-0.291145	-2.99304	3.04501
Neural Progenitor Cell;BS-181;trt_cp;0.37 uM;24 h	2.30285	2.1199	2.15495	-0.00637675	0.368487	0.408888	0.365548	-0.502209	0.596397	0.574175	2.56677	0.629527	0.3717	0.198976	0.645253	0.343773	0.162337	-0.107855	-0.456745	2.06919	0.775523	2.39212	0.2172	2.39537	-1.92011	-0.481278	-0.694637	0.835596	-0.413419	2.74011	-0.325674	-0.151897	0.766623	-0.148841	0.061207	-0.737569	-0.682855	-2.68161	-0.39559	2.57436	-3.24973	-0.338482	-2.44106	-2.73034	0.634212
Neural Progenitor Cell;GSK-429286A;trt_cp;0.37 uM;24 h	-0.598551	-0.245663	-0.105808	-0.0867656	-2.4235	-0.0505586	-0.488297	-0.183004	-2.15321	1.82458	2.44078	0.366363	2.73409	3.19889	2.72063	2.34777	0.448037	-0.0635169	0.0631873	0.431623	3.35694	3.03305	0.416653	3.14439	0.354534	0.0305058	-2.62665	0.245822	-0.60353	0.338902	-0.496258	-0.0613912	3.06253	0.24354	2.829	0.0671844	-0.35587	-2.29228	-0.723843	2.02689	0.458039	-0.0772381	2.61901	0.354589	3.1604
Neural Progenitor Cell;KIN-001-220;trt_cp;0.37 uM;24 h	-2.53227	-0.209154	-2.6204	-2.09504	-0.351469	-2.63003	-0.258751	0.0599121	-0.485468	-2.444	2.65607	-0.0962496	-0.276648	-0.246454	0.0589732	2.21774	-2.12677	-0.261538	0.101841	-0.115997	0.830682	3.09615	-0.162871	0.283444	0.130061	0.0720634	-0.104974	0.562067	-0.398792	2.30661	-0.618423	0.708507	2.82337	-2.81974	1.12642	0.333413	0.101878	-0.179623	0.0672986	0.755302	0.30741	0.591615	0.661586	-0.00888207	1.07971
Embryonic Stem Cell;WZ-7043;trt_cp;0.37 uM;24 h	-0.111603	0.206813	-0.0603215	2.18768	2.54837	-0.0611611	-0.0771799	-0.0058049	0.276033	-2.06263	2.43143	-3.41628	-3.40475	-2.86448	-0.0209431	-0.568283	-0.103824	0.22534	-2.68359	-0.480186	-0.244653	0.318855	-3.05341	-2.76976	-0.244746	-0.077148	0.467101	2.49644	-0.224001	3.0098	-0.0101486	0.831792	-2.80754	-0.58824	-2.68244	0.428168	3.07458	-0.384538	2.64066	0.0690106	-4.23452	0.855952	-3.1925	-3.02081	-0.442977
Neural Progenitor Cell;veliparib;trt_cp;10 uM;24 h	-0.246927	0.134265	-0.00306638	-0.128613	-0.348906	-0.436356	-0.00604502	-1.9466	-0.320362	-0.17149	2.73934	0.14374	-0.199027	-0.0156273	0.346693	0.098325	0.0670241	-0.334465	2.31279	0.0813426	1.1061	0.758808	0.377638	0.645335	-0.674982	0.122442	-0.16279	0.522079	-0.31148	2.53548	-0.279186	0.307141	3.26174	-0.0215254	0.679581	-0.050026	-0.396288	-0.191394	-0.254993	0.321964	-0.444973	0.497306	0.177177	-0.00668669	2.64767
Neural Progenitor Cell;dasatinib;trt_cp;10 uM;24 h	-0.900403	2.14926	1.58853	2.0411	0.904349	-2.3064	2.14988	-0.725854	2.08014	-0.56948	2.23842	0.121745	-0.428568	-0.401236	0.0725322	-0.469012	2.52535	0.411469	0.106022	2.27456	1.33993	2.92082	0.776919	0.0682471	-1.82293	-0.146547	-0.152072	0.714429	-0.622644	3.0151	-0.53959	-0.335004	2.61956	2.54519	-0.0963881	0.321882	-0.0100512	-0.125011	0.0154033	2.72739	-3.41865	1.95074	-2.39615	-2.91909	0.129617
Neural Progenitor Cell;FR-180204;trt_cp;10 uM;24 h	0.0629918	0.0727009	0.0186359	-0.409366	-0.243374	0.247459	-0.0399239	-2.30779	0.229819	0.127911	0.72209	0.394142	-0.211532	-0.225026	0.148735	0.714144	-0.213241	-0.483413	-0.371113	-0.389528	0.749468	0.328392	0.310664	0.075813	-0.641201	-0.141125	-0.396777	1.31887	-0.452886	0.745958	-0.497644	0.259513	0.407715	-0.515889	-0.0698556	-0.55137	-0.30335	-0.26052	-0.65404	0.301045	-1.25771	0.0472637	-0.212744	-0.251774	0.357505
Neural Progenitor Cell;HMN-214;trt_cp;10 uM;24 h	2.29716	1.89762	2.03573	0.48593	0.151557	0.481296	-2.4781	2.32222	0.0560864	0.512675	0.389571	0.747177	0.854161	0.585027	2.83883	0.375397	-0.398609	-0.46613	0.231846	2.54987	0.140849	-2.11228	-3.51049	3.46073	2.38879	-0.711031	-0.609684	-2.62361	-0.116189	-0.231641	-0.415453	-0.568378	3.26518	-0.0258595	0.571775	0.424833	0.144906	-3.30751	-3.03912	0.170941	3.3105	-2.43261	3.03051	0.28071	3.55974
Neural Progenitor Cell;alectinib;trt_cp;10 uM;24 h	0.274382	2.22455	2.07519	2.21777	2.13221	-0.112653	0.361461	-0.332631	2.04937	2.43329	2.45897	0.525794	0.289966	2.34641	2.89745	-0.0169964	2.39879	0.133497	2.72223	2.75235	3.54195	3.54935	1.085	2.89747	2.41486	-0.206364	-2.245	0.817356	-0.804927	2.21634	-0.51413	-0.476034	2.98997	0.346675	2.8159	0.672503	0.0104812	0.173483	-0.535816	2.63399	-0.209892	2.05697	2.61748	-2.31648	2.42751
Adipose-derived Stem Cell;vorinostat;trt_cp;10 uM;24 h	-0.403576	0.517583	-0.504309	0.348064	0.428101	0.340141	0.607057	0.362595	0.591939	-0.445078	0.962882	3.01878	0.511215	0.553583	0.421219	-0.289762	-2.2669	2.41348	2.63059	0.22965	0.0615377	-0.0987855	-0.72901	-2.86614	2.3612	2.76982	2.14016	3.2023	2.17362	0.130593	0.0218107	2.61503	0.431519	0.0689978	-2.3764	2.76138	3.46624	0.117933	0.3693	0.73518	-2.79757	-1.98284	0.1419	-2.70292	3.07765
Adipose-derived Stem Cell;BRD-A19037878;trt_cp;10 uM;24 h	-0.406998	0.470778	-0.397804	0.667968	0.0621704	0.158221	0.138506	0.333425	0.404966	-0.46214	0.950551	3.29799	0.452607	0.679265	0.378768	-0.0585453	-2.86017	2.45494	2.52132	0.171501	0.00812101	-0.221498	-0.586225	-3.14393	0.870318	2.55369	2.72583	3.66204	2.29155	0.700239	0.0627591	2.69443	0.471078	-0.65918	0.0190193	2.93251	3.53098	0.503446	0.491975	0.969461	-0.157725	-2.13174	0.620078	0.101112	1.16789
Neural Progenitor Cell;PF-04217903;trt_cp;10 uM;24 h	0.296594	0.363901	0.217136	-0.0313737	0.0452672	0.223243	0.424842	-2.05166	0.398012	0.162348	0.130167	0.192433	-0.279708	-0.321497	0.156504	0.219368	-0.328657	-0.560721	-0.324374	-0.115306	0.792983	0.18237	0.431165	-0.290439	-0.786709	-0.198761	0.0433012	1.10069	-0.560931	2.77129	-0.469961	0.417386	0.841333	-0.395365	0.220246	-0.152274	-0.420036	0.0544443	-0.230884	2.61443	-0.930043	0.0583368	-0.410373	0.0624053	0.364983
Neural Progenitor Cell;QL-XI-92;trt_cp;10 uM;24 h	0.535408	0.592574	0.652763	0.409093	2.2676	-0.00626123	2.76494	-0.0367621	3.02381	0.809755	3.45565	3.70265	0.758143	0.622948	0.750181	2.9377	0.158596	0.0434855	2.72746	2.89339	3.18452	3.2253	0.879712	2.96817	2.29376	0.993282	0.323514	1.1089	-0.328918	0.858069	0.0345635	0.209462	0.718492	0.280307	2.97267	0.249116	0.726436	-0.127613	-0.720603	0.490632	-0.102598	0.0336065	2.80396	-0.310319	0.508174
Epithelial Cell;tranilast;trt_cp;10 uM;24 h	0.0207341	-0.220381	-0.408131	0.023326	0.191434	0.0873473	0.335813	-0.0260242	0.551615	0.0230053	2.74008	0.0828312	2.73827	0.145526	0.730235	2.99929	-2.50504	-3.08329	-0.739043	-0.715647	-2.88903	-2.88154	0.970029	-3.15848	0.706691	0.8145	0.496083	3.4748	0.741196	1.03332	0.501943	-0.138168	0.0649384	-3.62676	0.474869	-0.0690486	-0.25505	3.10884	2.53199	3.22866	0.540964	2.98121	0.341877	0.494377	1.15189
Epithelial Cell;gefitinib;trt_cp;10 uM;6 h	-0.327456	-2.63203	-0.511561	-0.484485	-0.519902	-0.541447	-0.455703	-0.39829	-0.320966	-2.27326	-3.00248	0.114834	-2.9914	-0.0827067	-2.95285	-2.62931	-2.25836	0.208893	-3.94003	-2.96565	-0.62385	-3.09471	-3.64007	-0.791381	-2.75023	0.380416	2.74704	-1.77425	-0.141952	0.244035	0.16443	-0.502989	-0.835164	0.277131	2.31902	-3.04452	-0.0400221	2.59948	-0.258109	-2.88806	-0.128901	1.90841	-0.402618	0.47775	2.85012
Epithelial Cell;CMAP-CRCGN-CB7993113;trt_cp;10 uM;24 h	-0.213098	-0.681193	-0.637539	-0.140234	-0.33745	0.120415	-0.24914	0.423208	-0.0132905	-0.261615	2.50907	0.399118	2.22496	-2.12798	0.84244	2.51783	-3.10581	-3.13749	-3.27728	-0.811567	-3.6191	-3.5459	0.685038	-3.63924	0.0878952	0.846996	0.200678	1.43837	2.60657	0.696649	0.0898371	-2.56974	-2.46154	-2.98997	0.186074	-3.26273	-0.40803	2.89527	0.664058	3.22142	0.161198	2.81078	-0.180383	0.571604	1.06242
Epithelial Cell;NCS-382;trt_cp;10 uM;24 h	2.93085	-0.141827	2.47423	-2.3244	1.90194	0.377287	-0.233103	-0.221855	2.43319	2.88451	2.76139	-0.376356	3.17196	0.883831	0.447877	2.43769	2.65908	-0.0469084	-0.57247	-2.91616	0.294965	-0.144982	-0.341342	-0.681308	1.63218	2.39697	2.13406	3.00042	-2.11159	-2.06316	2.18962	-0.566266	0.235844	-0.529881	-0.231068	-0.509427	0.0272714	-2.68872	0.202506	-0.132948	3.00083	-0.115412	-0.261705	-0.10235	3.53114
Epithelial Cell;vorinostat;trt_cp;10 uM;6 h	2.03516	-0.0709485	2.1372	-0.544622	1.90471	2.16982	0.398534	-0.132908	0.781822	-0.0266557	-0.330777	0.168423	-0.443403	-0.248363	-0.0287226	-0.904978	-2.33081	0.323836	-0.337777	-0.834491	0.152415	-3.39408	-3.09007	-1.19144	-0.125107	2.35013	2.89952	0.730556	2.40225	0.222872	0.199359	0.0357027	0.344306	2.79612	-3.04852	2.91442	2.89399	2.68184	0.011394	-0.370755	-2.74092	2.29038	-0.548461	-0.191351	-0.0512618
Epithelial Cell;biotin;trt_cp;10 uM;6 h	3.86241	3.35353	3.61867	0.715354	3.67113	1.62418	1.13172	2.14477	3.6463	1.40402	0.14987	-2.95435	0.0898638	-0.031053	0.596012	2.22013	3.54584	0.0587384	2.9898	2.83577	3.98994	0.751035	3.45685	2.91313	-0.207386	0.183651	-0.581868	3.48447	0.725209	-0.693025	1.0047	-3.2606	-2.72223	4.11909	-2.22082	2.3282	2.7182	2.28652	-0.697621	2.22625	0.268281	-0.479256	-0.149987	-2.74367	-2.9212
Neural Progenitor Cell;dibutyrylcyclic-gmp;trt_cp;10 uM;24 h	-0.637552	-0.761428	-1.1746	-1.04154	-0.295419	-0.5003	-3.25596	0.118866	-0.0275587	-0.474308	3.15001	0.83792	2.32001	-2.29289	3.12588	2.80462	2.22493	-0.27314	-0.20136	2.74698	0.102283	0.252405	0.363197	-0.607876	0.86967	-0.450551	-2.66309	1.54596	0.478618	0.750733	-0.39927	-0.764114	-0.335948	-3.28298	2.61227	-2.46328	0.23913	0.557573	3.02194	3.13256	-0.255803	-2.61124	0.636046	-0.269582	0.660616
Neural Progenitor Cell;scopolamine;trt_cp;10 uM;24 h	-0.597345	-0.744226	-1.04512	-3.21078	-0.152753	-0.44546	-0.832282	0.137035	-0.173745	-0.521279	2.77935	0.687251	2.3103	-0.113406	2.73134	2.70293	0.112883	-0.381667	0.441463	2.73967	0.531754	0.163138	0.833527	-0.791158	0.799161	-0.434221	-2.43893	3.43717	0.445219	0.689094	-0.247086	-0.544386	-0.118019	-3.06957	3.05388	0.0942202	0.623748	0.817468	3.36075	3.4928	0.0737537	-0.205464	3.00298	-0.0708356	0.727497
Adipose-derived Stem Cell;GANT-61;trt_cp;10 uM;24 h	0.187046	0.287653	-0.0704571	2.85919	0.261635	0.0911823	2.35453	0.023217	0.703081	-0.107386	0.634715	-2.82527	1.05416	0.922802	2.56644	0.638093	2.679	0.871728	-0.179681	2.54287	-0.144158	-0.0850146	1.04399	0.0794179	-0.122269	0.00400117	-0.54377	0.190362	0.165077	-0.211144	0.514424	-3.11123	-3.38956	-1.90635	-0.156785	0.522021	3.43044	2.72686	0.255058	0.0467216	0.125326	-0.163451	2.50421	-0.104829	-3.63753
Neural Progenitor Cell;KIN001-242;trt_cp;10 uM;24 h	-0.0140865	2.6318	-0.297256	0.0623277	1.91565	-0.591181	2.29959	0.031199	2.65308	0.495865	0.921388	0.175005	0.417891	0.299161	0.817868	0.807183	-0.0244298	0.0133039	1.13175	1.13321	1.2113	3.27209	1.17804	0.42254	2.27766	0.252661	0.209237	1.62463	0.0575575	3.14408	-0.217335	0.262701	0.967099	-0.330016	1.15899	0.478347	0.165024	0.572646	0.403867	3.10358	-0.291281	0.36461	0.192693	0.591167	0.786494
Neural Progenitor Cell;ischemin;trt_cp;10 uM;24 h	-1.98427	2.18964	0.121529	2.23278	0.00263351	-2.39786	-0.130849	-0.776551	-0.110095	0.309117	2.69173	-0.0636023	-0.142073	0.116264	0.138225	-0.186809	0.189324	0.109837	2.23509	2.44821	0.795057	2.90478	0.111751	0.538421	0.0683608	-0.345784	-0.4023	0.210043	-0.553409	2.70244	-0.473141	0.19441	3.06796	-0.12476	2.27134	0.259778	-0.233858	0.335327	0.178993	2.00497	-2.66834	0.139823	-0.0678772	-0.0108142	2.4193
Neural Progenitor Cell;GSK-429286A;trt_cp;10 uM;24 h	0.247185	2.594	-0.116927	0.305426	2.58641	-0.034104	-0.351705	0.388927	2.6238	2.74986	0.521948	0.509625	2.82266	2.54542	3.53002	0.866756	0.000698423	-0.46246	3.48852	3.34414	1.20422	3.25367	0.357445	3.11547	3.41809	-2.49108	-2.87463	0.968874	-0.0183381	0.306455	-0.471331	-0.387534	0.974037	-0.469797	1.27312	1.0457	0.467813	0.196237	0.375928	3.92001	1.08151	-0.156809	3.27844	0.736046	1.38145
Epithelial Cell;BRD-K63993117;trt_cp;10 uM;24 h	-0.144801	-0.42907	-0.515404	-0.41203	-0.156443	0.222112	-0.100712	-0.286724	0.00880104	-0.205874	3.21054	0.464874	3.57969	3.16459	3.43003	2.99235	-0.0535471	-3.01146	-2.90541	-2.39538	-2.95099	-0.623842	2.91035	-0.875797	0.355459	0.65649	0.0503334	3.09243	0.899518	1.02006	0.369536	-2.67063	-2.89016	-3.55002	0.245259	-2.7595	-0.105764	3.39094	0.673588	3.31084	-0.0201931	-0.191085	0.187246	0.0943206	0.602568
Epithelial Cell;emodin;trt_cp;10 uM;24 h	-0.00989299	-0.230503	-0.256929	0.265226	-0.140641	0.16354	0.154584	0.458177	0.338884	-0.162374	2.55407	0.443482	2.32309	0.0172884	2.82361	3.03838	-2.83549	-3.28448	-2.82831	-0.512257	-3.20726	-3.19618	0.464257	-3.26005	0.572468	0.80854	0.420427	1.54416	1.11565	0.882701	0.243925	-2.54249	-0.57299	-3.238	0.438055	-2.92559	-0.432462	3.00755	0.572552	3.25385	0.199381	0.532649	-0.0248105	0.370421	1.08345
HSC;tretinoin;trt_cp;10 uM;6 h	3.10362	2.90766	3.2684	3.33739	2.66156	0.775917	2.85905	0.140751	0.832179	3.03068	0.383294	0.713052	-0.60163	-3.07068	0.486805	-0.193059	2.66576	-0.0452413	-2.86825	0.075555	-0.810649	0.0360304	-0.742209	0.175333	-2.85001	-0.515869	-3.10918	-1.24365	0.097599	-0.872406	0.269371	-0.486134	-1.5673	2.96853	-0.559985	-0.362828	-0.163249	-0.952058	-3.79509	-0.936034	-0.604601	-0.595177	-0.462689	-1.06288	-0.473881
HSC;iloprost;trt_cp;10 uM;6 h	2.76712	0.31821	0.405889	0.126037	3.38133	0.180006	-0.0891344	2.33706	0.626472	0.211271	0.512138	-0.0937317	-3.22005	-3.33957	-0.250004	-3.12684	0.860481	-3.29524	-3.26935	-3.46084	0.168363	-3.2862	-3.61787	0.373498	-0.77084	0.0946303	-2.80007	-1.28756	-0.178504	0.00747103	-2.50981	0.300818	-0.634009	3.53471	2.93544	2.85676	0.76473	-3.87841	0.0757968	-2.70704	2.66799	2.89531	0.251757	-3.2027	0.551763
Epithelial Cell;aflatoxin-b1;trt_cp;10 uM;24 h	-0.124849	-0.483809	-0.451115	-1.04369	-0.166307	0.196761	-0.336343	-0.30662	-0.131374	-0.0446965	3.03316	0.227511	3.09456	2.96854	0.657798	2.91278	-0.0991477	-0.223869	-2.93608	-2.64708	-2.82058	-0.127219	3.01732	-2.67035	0.43326	0.702453	0.0277237	3.14366	1.23905	1.15909	0.40405	-2.39294	-2.83064	-3.51319	0.160254	-2.58089	0.0996162	3.26069	0.386031	3.57935	-0.239966	2.77855	2.11969	-0.0654835	2.69466
Epithelial Cell;tetramisole;trt_cp;10 uM;24 h	3.15044	0.124603	2.83217	-0.0415588	2.72424	2.53954	0.181563	-0.479823	2.76811	3.14746	2.62099	-0.270527	3.32115	0.845494	0.489323	0.41621	2.74579	0.233552	-0.592519	-0.538012	0.268254	-0.0277562	-0.303343	-0.409758	0.0969909	2.31713	-0.393463	2.71971	-0.322546	-2.40714	2.01696	-0.630767	-2.41294	-0.292285	-0.189452	-0.606508	-0.275124	-2.39189	2.30759	-0.243821	2.88557	-0.95588	-2.60731	-0.051515	3.15065
Adipose-derived Stem Cell;alfadolone-acetate;trt_cp;10 uM;24 h	-0.371872	0.315722	-2.46922	0.6747	-2.79539	-2.15844	0.301192	-0.219395	0.614117	-0.632021	0.179984	1.00226	0.0672768	0.0407847	0.0362902	0.169414	0.176306	0.444035	0.0647802	0.463449	-3.12439	-2.36989	0.310225	-2.93127	0.321972	-0.0267128	-2.04806	3.31001	0.679403	-0.0257791	0.0212653	-2.90147	-2.64783	-3.26943	0.101595	3.21887	3.42206	2.99157	-2.10732	0.747936	0.39344	2.17134	2.86472	0.455837	-2.35106
Embryonic Stem Cell;AZD-4547;trt_cp;0.37 uM;24 h	0.00247844	0.397601	0.156849	2.41091	2.73461	0.172724	0.110251	0.211276	0.533153	0.198852	2.45819	-3.50479	-3.44201	-2.89858	-0.0483319	-2.89836	0.333201	0.276798	-2.42631	-0.324773	0.16487	0.505997	-3.17743	-2.54337	-0.426038	-0.235928	0.149161	-0.273195	-2.42114	0.519694	-0.106893	0.704995	-3.18379	-0.118818	-2.68955	0.570272	3.15189	-0.168232	2.82108	0.0281151	-4.20712	2.18274	-3.09995	-3.00424	-0.173897
Embryonic Stem Cell;NVP-TAE226;trt_cp;0.37 uM;24 h	-0.427034	-0.0244396	-0.328304	-0.31953	0.25881	-0.415063	-0.373565	-0.199494	0.108457	-0.216352	-2.56207	-3.61401	-3.91562	-3.68455	-0.691337	-3.0371	-0.341323	-2.54989	-0.421927	-0.770268	-3.1222	0.166609	-3.45334	-1.05508	-2.95715	-0.159137	0.531375	-0.0184629	-2.46964	0.643413	0.207566	0.96525	-2.99445	-0.352512	-2.43926	3.09783	3.45453	-0.141494	2.97567	-0.0333387	-3.80753	2.94059	-2.95909	-0.167998	0.0541322
Embryonic Stem Cell;BS-181;trt_cp;0.37 uM;24 h	-0.0208743	0.464583	0.145808	0.311769	0.791994	-0.0667777	0.0861521	0.236958	0.501229	0.161079	-0.212051	-3.65399	-3.54815	-3.44641	-0.373229	-2.82199	-0.181497	-0.347338	-0.392816	-0.783276	-0.0993472	0.0692097	-3.38906	-0.991485	-2.76378	-0.251812	0.458607	2.61874	-2.33713	0.58448	-0.0157948	0.895623	-2.91859	-0.110079	-0.241174	3.39591	3.33766	-0.504703	2.74089	-2.27829	-3.71438	2.56187	-2.64515	-0.0665508	0.374485
Embryonic Stem Cell;masitinib;trt_cp;0.37 uM;24 h	0.115416	0.533622	0.117085	0.211807	0.613247	0.0283306	-0.0902347	2.14291	0.424515	0.275376	-0.197187	-1.13937	-3.61309	-3.27345	-0.137085	-2.84566	0.0519305	-0.37671	-0.406009	-0.73691	-0.0485009	0.0011851	-3.17109	-2.72764	-2.5141	-0.0773493	0.22424	-0.22993	-2.43785	0.518269	-0.00847452	0.850963	-2.86414	-0.0307105	-2.6275	2.92857	3.18267	-2.80737	0.78805	-0.0961358	-3.98569	2.46639	-2.54061	-2.91393	0.162394
Embryonic Stem Cell;AZ-628;trt_cp;0.37 uM;24 h	-0.0016488	0.32873	0.103029	0.198998	0.502818	-0.244819	-0.0136555	0.18622	0.38622	-0.0612911	-0.14904	-3.52787	-3.60271	-3.32459	-0.222423	-2.62975	-0.206754	-2.40273	-0.532716	-0.707649	-0.298045	0.0304319	-3.08259	-2.9637	-0.396351	-0.0617735	0.557172	2.30088	-0.155932	0.593639	-2.26259	0.947792	-2.6673	-0.610576	-2.42692	0.543175	2.85093	-2.46568	2.60215	-0.0480346	-3.90282	2.34048	-2.9773	-2.52723	-0.0750372
Embryonic Stem Cell;AST-1306;trt_cp;0.37 uM;24 h	-0.0164701	0.31103	0.0616555	0.180598	2.63874	-0.0336252	-0.105379	0.180604	0.387767	0.068515	0.298318	-3.31766	-3.45837	-3.10135	0.146916	-2.6332	0.170768	0.111895	-2.48386	-0.557131	-0.0666222	0.478122	-3.10428	-2.71842	-0.123596	-0.120984	0.141202	2.33228	-0.363325	0.589273	-2.15077	0.681013	-2.71347	-0.207769	-2.62892	2.9144	2.8408	-2.59879	2.37479	-0.151343	-4.0799	0.769616	-2.82863	-2.83254	0.0334651
Embryonic Stem Cell;KW-2449;trt_cp;0.37 uM;24 h	0.0444221	0.470868	0.143878	0.221497	0.419345	-0.0535965	0.0641089	0.373778	0.396983	0.0833089	0.0612321	-3.20548	-3.68946	-3.36327	-0.178772	-2.73391	-0.00472975	-2.48242	-2.56396	-0.802492	-2.82126	0.0972827	-3.38475	-3.04386	-2.54528	-0.167706	0.293106	-0.192549	-2.31418	0.664666	0.0093346	0.877554	-2.53755	-0.315864	-2.28901	2.98972	3.00912	-2.45198	0.5592	-5.29816e-05	-3.81998	2.31578	-2.77599	-2.64259	0.178891
Embryonic Stem Cell;quizartinib;trt_cp;0.37 uM;24 h	0.0432187	0.469452	0.212418	0.314348	0.56523	-0.271347	0.302319	0.274368	0.459558	-0.0167158	-0.0192153	-3.55976	-3.64475	-3.4217	-0.237826	-2.93401	-0.551056	-0.434308	-0.631008	-0.949271	-0.463733	-0.154957	-3.41207	-2.92083	-2.61717	-0.00903039	0.744044	-0.0686681	-0.183617	3.20989	-2.38647	0.983631	-2.68895	-0.428522	-2.23737	0.520573	2.99311	-2.56921	2.76974	-0.133962	-3.98564	0.625122	-2.97021	-2.77266	-0.0200412
Embryonic Stem Cell;PHA-767491;trt_cp;0.37 uM;24 h	0.162893	0.472515	0.328205	0.146321	0.847454	0.159434	0.130476	0.245682	0.551625	0.32504	0.154005	-3.46608	-3.52867	-3.01295	2.4295	-2.7934	0.18728	2.31205	-0.0314624	-0.428613	0.257871	0.27407	-3.14603	-0.829138	-0.229633	-0.0753199	0.179821	-0.166368	-2.47073	0.522143	-0.0184676	0.629524	-2.57957	2.63313	-2.15463	3.23825	3.19285	-2.68883	0.950765	0.0370384	-3.85832	2.46952	-2.19738	-2.74385	0.015785
HSC;AZD-1480;trt_cp;0.37 uM;24 h	-2.15299	-2.78853	-2.65419	-3.11986	0.119689	-0.07153	-2.55629	-0.340218	-2.43334	-0.0844963	-0.679734	-3.89903	-0.213007	-0.878634	-2.67181	-0.337349	-0.60539	-0.528921	2.62665	0.0535497	-0.0124932	0.0962386	-0.0202053	2.25258	3.01809	0.482439	0.566356	0.971777	0.574228	0.705725	-0.070023	1.27721	0.18655	-2.44118	0.272155	2.73181	-0.310286	0.510517	3.81636	0.742459	-0.303687	0.708668	0.432083	0.323913	1.25847
HSC;BRD-K29983336;trt_cp;0.37 uM;24 h	-0.0293879	-0.603375	-0.260037	-0.174823	0.118939	0.0487882	-0.164976	-0.485778	-0.216399	0.0918442	-3.18891	-3.06003	-3.60924	-3.4864	-3.81331	-3.5873	-0.77999	-2.85085	-0.866	-3.34764	-3.18215	-1.23922	-3.62769	-2.92084	-1.35226	-0.131135	2.783	-3.40264	-0.0614688	-0.270027	-0.420461	0.757895	0.103887	2.97823	-0.417902	-0.240118	0.901013	-3.41773	-3.32169	-3.46465	-0.21089	0.650648	0.361841	0.332792	-2.29781
Embryonic Stem Cell;dacomitinib;trt_cp;0.37 uM;24 h	0.00794863	0.404206	0.100762	0.183902	0.55208	-0.127962	0.00224222	0.138067	0.354822	0.0418569	0.0849869	-3.46429	-3.74254	-3.34573	-0.140868	-2.74522	-0.0355491	-2.39652	-0.418257	-0.635841	-0.140352	0.180931	-3.25509	-1.09047	-2.54101	-0.0127697	0.382236	-0.174522	-2.43403	0.632347	-2.09436	0.745346	-2.73093	-0.0990018	-2.42447	2.99793	3.07965	-2.75237	0.766046	-0.0682359	-4.00471	2.40846	-2.8044	-2.87164	-0.171641
Epithelial Cell;PCI-34051;trt_cp;0.66 uM;6 h	-3.13588	-3.07812	-3.41428	-0.339605	-3.10854	-2.81492	-0.556277	-2.21532	-2.45708	-3.0271	-0.177734	0.00331542	-0.593243	-1.16161	0.0565448	2.3664	-0.948369	-0.716309	-3.80407	-0.54848	-1.02005	-3.98324	0.280342	-3.47208	-2.9676	0.123941	0.710984	1.67195	0.883796	1.04611	-0.0670087	0.0135089	-0.627104	-1.09636	-0.321378	-2.98151	-3.20545	0.321516	0.924827	-0.187007	-0.37217	3.0559	-2.7195	0.117407	0.424905
Epithelial Cell;BRD-K26510616;trt_cp;0.66 uM;6 h	-0.526444	-3.06776	-3.04544	-0.130854	-2.69445	-0.655676	-0.484775	-2.39954	-0.658272	-0.680671	-0.297343	-2.82406	-0.743495	-0.937248	-0.208791	2.25057	-0.713352	-0.460897	-3.63813	-0.569148	-0.670737	-4.09794	0.239144	-3.29498	-2.95254	1.98705	0.815166	1.14964	2.54805	2.86561	-1.71952	-0.380813	-0.467487	-2.09737	-2.35666	-3.05555	-3.38556	-2.07092	3.11794	-0.342223	-2.65397	3.46017	-3.2152	0.320725	-0.170395
Epithelial Cell;tubastatin-a;trt_cp;0.66 uM;6 h	-2.32801	-2.83927	-3.19039	2.27731	-2.9283	-0.224112	-0.358255	-0.000615631	-0.288547	-0.0944231	-0.523529	-0.336693	-0.830006	-3.19428	-0.494064	0.24923	-1.05239	-0.424124	-3.06805	-0.192168	-0.84279	-3.93912	0.361651	-3.54655	-2.85869	0.822649	1.05808	2.88725	2.71818	2.84436	0.0340734	-0.130925	-0.462855	-1.29947	-2.59871	-0.167407	-2.55391	0.537062	2.95381	2.44421	-0.502274	3.45376	-2.85088	0.440804	0.363031
Epithelial Cell;midostaurin;trt_cp;10 uM;6 h	0.368665	0.0956214	0.344413	0.236585	0.60681	-0.0225179	0.556179	-0.491133	0.363237	0.334368	-2.75974	-3.38713	-3.50203	-3.27196	-2.80267	-2.87807	2.8369	-0.0282741	0.310635	-2.76342	3.43998	-0.0316512	0.0730013	-0.430601	-0.0334016	0.325923	2.89091	3.41148	-0.158927	2.48218	0.529669	1.97585	-0.262426	3.25673	0.0986879	0.135235	0.0435462	-2.63085	-0.00436778	-0.499441	-0.0590065	0.76762	-2.90514	-2.54159	-0.241264
Epithelial Cell;benzthiazide;trt_cp;10 uM;24 h	2.21882	-2.18595	2.09914	-0.471701	0.111466	0.394256	-0.454179	-1.93763	-0.14096	0.672387	2.23362	-0.592281	0.459532	0.507645	0.365541	2.24221	2.34233	0.0682977	-2.49381	-2.45266	-0.397185	-0.51632	-0.522673	-0.20015	-0.138805	2.352	-0.0304466	-0.22778	-0.0425027	0.0303374	2.31112	-0.248207	-0.114372	-2.997	-0.069408	-0.468178	-0.206549	-2.25678	2.1239	-0.391705	2.84021	-2.36398	-0.366363	-0.0641494	2.66071
Epithelial Cell;colforsin;trt_cp;10 uM;24 h	2.87548	-0.548224	0.230151	-0.47004	0.0544878	2.30582	-0.171823	-0.00843177	0.404366	2.57367	2.51203	-0.170528	2.8919	0.653657	0.320164	0.0522088	2.23982	-2.82432	-3.16042	-3.38509	-0.0981597	-0.57435	-2.86155	-2.54007	-1.95607	2.56951	-0.451726	3.41624	-0.160315	-0.304085	-1.82576	1.72707	-0.0260279	-2.76994	0.209959	-0.436286	0.222456	0.59258	0.54319	-0.027617	3.0055	2.03675	-2.81953	0.499121	3.51997
Adipose-derived Stem Cell;raloxifene;trt_cp;10 uM;24 h	0.686794	4.08719	0.347813	4.16645	3.4091	0.101636	3.80999	-0.241098	3.51807	0.183462	0.64191	-2.87217	3.63334	3.39773	0.875388	0.744194	2.47596	0.948915	0.980102	3.26704	3.12322	0.552518	3.34658	-0.0295802	0.515331	0.0747422	-0.808186	3.42287	0.554347	0.0630103	0.386144	-2.81693	-2.78526	-1.83428	0.181463	4.00425	4.57855	3.45021	0.697692	1.01659	0.0775534	0.293968	2.60205	0.636985	-0.550795
Neural Progenitor Cell;CL-218872;trt_cp;10 uM;24 h	0.141607	2.67083	-0.335216	-0.0219092	3.33063	0.0373811	2.62135	0.0511685	3.06154	0.252031	0.227814	0.128162	2.92572	0.169025	2.59211	0.600637	0.177051	-0.15163	3.1163	3.62719	1.24841	2.65406	1.06062	1.78366	2.89886	-0.597554	-0.240706	3.6741	0.337189	0.788389	-0.48175	-0.558141	0.283056	-2.37012	1.37575	1.27416	1.00879	1.25376	3.56307	3.75601	0.559237	-0.18473	1.04069	0.755616	0.611955
Neural Progenitor Cell;GSK-J1;trt_cp;10 uM;24 h	-1.77322	2.09705	0.222543	-0.0247289	-0.131788	-2.06924	-1.88082	-1.09289	0.00307345	1.89071	0.306487	-0.0224885	0.100002	2.39183	2.40954	-0.103507	2.27153	0.22685	2.72622	0.0890413	3.05371	3.04669	0.285492	2.57575	0.287742	-0.397488	-2.39366	0.463599	-0.606362	2.2899	-0.358987	0.155036	2.97765	0.265485	2.50202	0.241395	0.0699943	0.376288	-0.00985049	2.68771	-2.35479	0.37106	1.92172	0.0720649	2.80293
Neural Progenitor Cell;UNC-1215;trt_cp;10 uM;24 h	-0.975259	2.04156	-1.87471	-0.387757	-2.3408	-2.12797	-0.579839	-0.608009	-1.94173	-0.130919	0.74294	-0.187635	-2.65714	2.57329	2.49801	-0.294895	2.38013	2.89575	0.129167	0.453023	2.82651	3.42027	-0.119778	2.72836	0.205076	-0.066469	-2.60859	-2.52775	-0.779947	2.18141	-0.119323	-0.409595	0.443815	0.225817	0.194087	0.338817	2.48155	-0.0173864	-0.641712	0.342638	-3.06916	0.217056	2.05128	-2.86994	-0.099184
Neural Progenitor Cell;GW-5074;trt_cp;10 uM;24 h	-2.20522	0.326089	-2.09567	0.155059	1.96544	-2.44902	2.02546	-2.90426	0.346532	-1.74109	0.148497	0.419631	-0.322725	-0.197524	0.285614	0.238627	-0.724795	-0.0477256	0.507177	0.222686	0.66141	0.137327	0.503342	0.106801	-0.316779	0.0558366	0.3327	1.18297	-0.254627	1.45411	-0.433243	0.674305	1.06326	-3.02581	0.699788	0.178944	-0.157851	0.548967	0.419214	1.06224	-0.387811	0.479059	-0.346196	0.479867	0.931146
Neural Progenitor Cell;quizartinib;trt_cp;10 uM;24 h	0.318063	1.70178	-0.141125	1.82619	2.19377	-0.343016	2.01945	2.55808	2.18215	0.392224	0.368666	0.749163	0.308344	-0.512927	0.110359	0.806597	-0.412571	-0.470399	0.342941	3.04495	0.497153	-0.245255	0.427181	0.255232	0.259755	0.111016	0.397619	1.08309	0.352443	3.21296	-0.319286	0.00951613	0.875491	-0.350706	0.600175	0.666786	0.493485	0.0576004	-0.443911	1.09547	-0.427456	0.37006	0.899231	0.346674	0.672424
Neural Progenitor Cell;Y-27632;trt_cp;10 uM;24 h	1.945	2.71526	1.9246	0.669673	0.81481	-2.3336	2.31252	-1.04376	0.726823	1.94487	2.34227	-0.169611	0.102637	0.271925	0.134155	-0.336529	0.778133	0.527479	2.74625	2.62323	3.35957	3.12514	1.02845	0.743013	-1.83438	-0.246943	0.078517	0.891904	-0.54091	2.98309	-0.654705	-0.00507039	3.56751	0.295002	1.88486	0.340501	-0.383027	2.39905	0.297275	2.668	-3.0082	1.92664	-2.6687	0.321757	2.00479
Neural Progenitor Cell;KIN001-244;trt_cp;10 uM;24 h	0.50675	-0.175135	0.319062	-0.336281	0.50055	0.103918	0.222121	-0.309672	0.230246	0.37169	-0.386945	-0.531388	-1.14542	-3.38355	-0.19671	-0.521266	-0.245503	-0.358595	-0.170043	-0.443398	0.460238	-0.816386	0.803079	-0.536349	-1.73945	0.155403	0.313686	1.12181	-0.415146	2.83761	-0.401973	0.943677	0.460658	1.01506	0.298803	-0.539751	-0.200713	0.102708	0.0496211	0.00356163	-0.88271	0.928579	-2.65557	0.258309	-0.183758
Epithelial Cell;dorzolamide;trt_cp;10 uM;24 h	-3.61021	-2.95626	-3.54651	-2.51693	-0.511625	-0.491069	-2.42938	-2.35334	-2.86064	-3.38055	-2.58886	3.14618	-2.49556	-0.368557	-2.3375	-2.38464	-0.472128	0.557855	2.68846	0.717682	0.0573335	2.45377	-2.46249	2.8621	2.78479	-2.70969	-2.7714	-2.47588	-0.209184	-2.47531	-2.83813	1.25512	0.326646	-0.6771	2.94902	0.131092	-0.523534	3.79318	0.749921	-0.278409	2.37493	-2.92801	-1.99489	3.12539	-3.16478
Neural Progenitor Cell;AZD-1480;trt_cp;10 uM;24 h	-1.78081	2.30012	-1.63012	0.0455756	-1.91204	-0.593035	-0.188639	-0.84396	-0.361004	-0.365478	0.351224	0.144407	-3.18693	-0.238356	-2.60585	0.0308826	0.26135	0.504446	-2.16182	-2.17653	0.461722	2.91837	0.194406	-0.252266	0.454695	-0.212599	0.139489	0.618173	-0.763537	2.679	-0.565036	-0.24832	2.26894	-0.639368	2.15394	0.060244	-0.13126	2.953	-2.29397	2.60109	-3.47792	0.245077	-3.16945	-2.92504	2.38917
Embryonic Stem Cell;rebastinib;trt_cp;10 uM;24 h	-0.0987317	0.351547	0.0983349	2.53506	2.88383	-0.0995207	0.0801095	0.10635	0.482486	0.0450081	0.0685317	-3.32085	-3.64145	-2.93347	2.32693	-0.53764	0.196159	0.477925	-0.123594	-0.452066	0.0534392	2.93519	-3.18463	-0.533593	0.192526	-1.62684	2.19577	-0.150844	-2.76047	0.759195	-0.240395	0.794796	-2.99538	0.599922	-2.44454	0.492385	3.10841	-2.75221	2.99	-0.0943572	-3.80822	0.413024	-2.82024	-2.96581	-2.30306
Epithelial Cell;BRD-K67808578;trt_cp;10 uM;6 h	0.666563	0.468181	0.540179	0.158645	2.20357	0.626281	0.659574	-0.169399	0.544351	0.335048	-0.618392	-0.525566	-2.50374	-2.19333	-0.763989	-2.35361	-0.39768	-0.308627	-2.81857	-3.12388	2.82514	-2.83936	-2.39911	-0.486722	-0.51515	0.878722	2.90707	2.82803	-0.387953	2.45436	2.77302	-0.127349	0.376129	0.818714	0.950661	1.07402	0.59932	3.54999	-0.815678	0.765559	0.97988	3.53048	-0.671599	1.2405	2.7914
Epithelial Cell;vinblastine;trt_cp;10 uM;24 h	-0.0621909	-0.453397	-0.466865	-0.625932	-0.454622	-0.332786	-0.513015	0.195154	-0.107515	-0.33069	2.73852	0.572032	3.25306	0.312629	3.30029	2.81646	0.0716014	-2.92812	-2.84069	-3.10362	-0.824355	-2.73654	-0.554189	-0.764268	0.810248	2.66157	0.404796	0.878682	0.226859	2.57756	0.127325	-2.62876	-2.43267	-4.08253	0.196469	0.202167	-0.0805949	0.190696	-0.119233	2.90353	2.78001	-2.4973	2.50675	-0.133502	2.86946
Epithelial Cell;cisapride;trt_cp;10 uM;24 h	3.02645	0.0493156	2.91161	-0.145157	2.92343	2.41452	-0.112806	-2.20119	2.78761	2.92936	0.220656	0.171731	0.659154	0.531355	0.248356	-0.245983	3.76682	0.548419	-0.488461	-0.244344	-0.0709017	-0.00565924	-0.655054	0.838239	0.337355	2.35165	-0.627805	-0.347254	-0.784434	-0.710416	0.295507	-0.900157	-3.48418	0.940614	-0.423588	0.109769	0.387028	-0.345295	0.502008	-0.6411	0.312138	-0.28303	-0.0372024	-2.6623	0.250242
Epithelial Cell;manumycin-a;trt_cp;10 uM;6 h	0.105557	-0.236407	-2.14073	-2.09354	0.586748	2.20714	0.631015	-0.369572	2.61264	-2.24048	-2.83894	3.11521	-0.0889892	-2.26616	0.00924933	-2.6629	-3.00005	-0.395376	0.188937	-0.101153	-0.292895	-3.61338	-0.584964	-3.29013	0.0608808	2.53631	3.01832	3.84287	0.311115	-0.143193	2.34554	1.91164	0.479051	-0.37454	0.412025	4.09767	3.87159	1.4313	-0.0329509	0.825374	0.489364	0.293827	0.169847	0.850848	0.746268
Neural Progenitor Cell;BRD-K96043519;trt_cp;10 uM;6 h	-0.371289	-0.675969	-0.565841	-2.96682	-1.05017	-0.256772	-0.918653	-0.141185	-0.520015	0.203445	3.22387	3.03665	0.156456	0.626178	0.551402	2.91594	-0.16043	0.386451	-3.44581	-3.18548	-2.502	0.0540153	-3.18877	-2.70233	-0.0479952	0.0391524	-2.89719	2.98084	0.385297	3.14711	0.413248	0.824872	-0.276299	-3.38459	2.9076	0.247421	3.88077	2.622	-2.75756	2.84327	2.52352	2.43873	2.23792	0.503687	3.07175
Neural Progenitor Cell;BRD-A11009626;trt_cp;10 uM;6 h	0.176777	0.707264	-0.107219	-0.523287	0.193716	-0.0437825	0.205649	2.70873	0.453782	0.292763	0.736076	1.19877	0.132293	-0.172266	0.44887	0.0731393	-0.510281	-0.620211	0.179443	-0.549976	0.418167	2.20547	-0.364324	-3.38293	0.480978	-0.0920522	-0.309463	3.53018	0.304853	3.24154	-0.132733	0.462269	0.712336	-3.19522	0.867175	0.967085	3.87185	0.516489	2.85855	1.50673	0.364611	0.332398	0.565618	0.318822	0.748564
Epithelial Cell;austricine;trt_cp;10 uM;24 h	2.53616	-2.0869	2.17075	-2.52072	0.416464	0.175695	-2.25464	-2.19824	0.599908	2.35851	2.64472	-2.56868	2.90867	0.86934	0.279667	0.529409	2.68832	0.034922	-0.540537	-0.812592	0.178472	0.0198111	-0.599302	0.00452219	-0.160236	2.67928	2.17424	-0.287895	-2.28825	0.1935	0.0412945	0.103222	0.698556	0.121935	-0.172323	-2.68757	-0.761749	-2.93809	2.32706	-0.640073	0.338289	-0.563224	-0.752854	-0.0536024	3.39327
Neural Progenitor Cell;BRD-A35825362;trt_cp;10 uM;6 h	0.164057	0.0748966	-0.210031	-1.1158	-0.319376	0.178753	-0.470105	0.372285	0.322503	2.76612	0.250603	-0.0993902	0.0832613	0.509837	0.25883	2.52302	-0.120676	0.442094	-2.54535	-2.35627	-0.0503411	0.562705	-3.30151	-1.25588	0.0961751	1.99615	-2.6261	3.0895	0.455481	0.893715	0.274994	2.57659	-0.0146486	-2.56263	3.10332	3.41477	4.68494	0.761478	-0.363299	2.83812	3.0403	2.9392	3.23996	0.74598	2.91952
Neural Progenitor Cell;daminozide;trt_cp;10 uM;24 h	-2.48701	-0.387205	-0.353135	-2.67649	-2.67288	-2.32065	-2.38443	-1.0737	-2.38293	-0.478776	0.394728	0.321229	-0.480268	-0.296229	0.0378933	-0.07701	-0.567994	-0.0347191	-0.0757429	-2.45975	0.260457	-0.0430993	-0.0572821	0.110208	-2.35749	0.220308	-0.0333106	0.5641	-0.303894	1.2121	-0.287579	0.444238	2.8182	-0.703155	0.300641	-0.25522	-0.452588	-0.0262841	-0.292006	0.0643841	-2.7394	0.704096	-0.191737	0.361448	2.94088
Neural Progenitor Cell;AST-1306;trt_cp;10 uM;24 h	0.399198	2.28821	0.397717	-0.108363	1.63894	0.0166363	2.53229	0.243692	1.86428	0.21193	0.0155025	0.543085	-2.85985	-2.89504	-0.0291429	0.0344504	0.0292599	-0.155789	-2.28874	-0.147694	0.335904	-0.0679672	0.387489	0.0231502	-0.179442	-0.0778268	0.42674	2.92395	-0.47923	2.63157	-2.4175	0.115003	0.350375	-0.0311872	-0.0943641	0.287142	0.195759	0.0154005	-3.14626	2.9493	-3.73936	0.340242	-0.213827	-3.1687	0.224508
Epithelial Cell;procaine;trt_cp;10 uM;24 h	-3.13638	-1.02413	-1.19655	-0.227274	-2.90166	-0.192273	-0.540786	-0.261987	-2.73328	-0.846352	-0.285998	0.0816432	-1.11096	-1.49944	-0.268464	0.0453424	-3.35006	-3.12694	-0.439618	-0.676807	-4.29945	-2.91661	-0.156209	-3.24369	-0.527129	-0.109642	0.181466	0.534572	0.0413574	0.350458	2.95954	1.38649	-2.18898	-3.68924	3.18268	-0.271414	-0.293894	0.650738	0.194287	-0.245426	1.17756	0.318212	0.328434	0.892588	-0.232864
Embryonic Stem Cell;SAR-245409;trt_cp;10 uM;24 h	-0.0506732	0.30281	0.103748	0.0403559	0.367888	-0.106099	-0.0604381	0.28224	0.248023	-0.0734527	0.297755	-3.17902	-3.55753	-3.08185	0.0859922	-2.64697	-0.17559	0.0305267	-2.64265	-0.71347	-2.95525	0.119178	-3.29932	-2.90359	-2.46957	-0.0311232	0.336036	-0.193873	-0.382299	0.50387	2.00992	0.769836	-2.79603	-0.371725	-2.40334	2.80927	2.99357	-2.82666	2.40441	-0.128696	-4.10995	2.50262	-2.79998	-2.83059	-0.357396
Epithelial Cell;buspirone;trt_cp;10 uM;6 h	3.31119	2.94081	3.03836	3.21843	2.76723	3.13498	3.30223	0.531327	3.12314	3.14053	-0.0054113	0.0682628	0.588778	0.406331	-2.41886	2.25066	2.70489	0.410463	2.52216	2.76636	3.54481	0.0926292	3.80205	-2.32197	2.52928	-0.19071	-0.412389	3.7557	-0.365447	-0.141775	2.80248	-0.859789	-0.00327178	0.1313	2.58099	-2.39953	0.0890852	3.41417	-0.228956	3.01042	3.02526	-0.00809624	-3.09241	0.519822	0.556246
Epithelial Cell;carbon-tetrachloride;trt_cp;10 uM;24 h	-0.0481652	-0.308688	-0.542249	-0.131482	-0.203974	0.0506932	0.0597327	-0.111662	0.190986	-0.0773394	2.94153	0.260885	2.99088	2.48952	1.16158	3.00143	-2.29778	-3.19255	-2.85333	-0.52466	-3.03779	-3.12753	0.879967	-3.00113	0.542681	1.04336	0.161783	1.7408	0.830523	0.946132	0.328775	-2.46418	-2.52828	-3.56284	0.337764	-2.84971	-0.362461	3.04129	0.526927	3.4062	0.164809	2.73794	0.365301	0.260315	0.780393
Epithelial Cell;glimepiride;trt_cp;0.74 uM;24 h	-1.79416	-0.0919131	-1.92336	2.45048	1.84911	-0.135834	0.241734	0.607924	-2.07701	-2.54062	0.602858	-2.5216	0.468822	-0.106237	0.403701	3.12285	-0.643783	-0.150759	0.067482	-0.0776191	-2.87205	-0.160891	3.24681	-3.15545	0.269526	0.208772	0.266967	0.370134	0.338583	0.549471	0.48854	0.647057	0.837695	-3.64014	2.56575	-2.9756	-0.623193	0.188485	2.36253	0.189468	3.02888	-0.622223	-2.20334	0.678457	-0.659676
Neural Progenitor Cell;KIN001-269;trt_cp;1.11 uM;24 h	-2.05446	2.4223	0.328768	2.43211	-0.0104172	-2.32094	-0.121664	-0.600327	-0.342107	0.126716	2.69885	0.0431634	0.00299962	0.0990366	0.372979	0.29185	2.37827	-0.0753393	2.40505	2.54784	1.11009	3.32744	0.44724	2.6473	0.180746	-0.29255	-0.449016	0.60857	-0.204923	2.72477	-0.197144	0.435353	3.18199	-0.210761	2.67328	-0.17811	-0.660792	-2.33963	-0.237352	2.16317	-2.7855	-0.0582499	-0.022587	-2.45748	2.58424
Neural Progenitor Cell;EX-527;trt_cp;1.11 uM;24 h	0.465626	2.11195	0.379417	0.0489379	0.142818	0.0408195	0.216447	-0.785663	0.273097	0.822113	0.16272	-0.408587	-0.158523	-0.0358008	0.136564	-0.523867	2.6561	0.135017	2.22093	2.32084	1.31246	3.02344	0.576328	0.793966	-1.68264	-0.0308769	-0.113194	0.846516	-0.758545	2.60091	-0.484195	0.368937	2.88581	0.478042	0.47372	0.520304	-0.126136	0.0974616	-0.188127	2.76291	-2.6606	2.22869	-2.3054	-0.21774	2.63897
Neural Progenitor Cell;RG-108;trt_cp;1.11 uM;24 h	-2.23615	0.171887	-2.13074	-2.5477	-2.47692	-2.42613	-2.51088	-0.681948	-2.40646	0.0736513	2.43748	-0.278216	-0.194018	-0.0709681	-0.207861	1.93023	2.34447	0.0635738	-0.0742069	0.0722511	0.989793	3.25828	0.19671	0.792466	-1.78367	-0.532505	-2.2906	0.506652	-0.526322	2.65678	-0.586544	0.375323	3.19364	-0.270854	0.4559	0.16716	-0.219915	0.0840824	-0.309433	2.43214	-2.8151	0.347833	0.172616	-2.43973	2.36361
Neural Progenitor Cell;KIN001-270;trt_cp;1.11 uM;24 h	-0.225853	0.0699407	-0.049927	-2.1362	-0.231087	-0.354437	-0.200271	-2.01449	-0.310851	-0.0476217	2.21862	-0.00427383	-2.92344	-2.62433	-0.178149	-0.238382	0.0680328	0.00510194	-2.17156	-0.200501	0.490935	2.73413	0.418509	2.13708	-0.335855	-0.603025	-0.408245	0.618925	-0.648527	2.40653	-2.59716	0.1834	0.776914	-0.187874	-2.65813	-2.85236	-3.11018	-2.69868	-2.27906	-0.0669195	-4.21819	-0.0745195	-2.56111	-3.21162	-2.27691
Neural Progenitor Cell;MC1568;trt_cp;1.11 uM;24 h	-0.195994	2.43549	1.67233	2.36002	0.233266	-2.01257	0.0895504	-0.346115	1.33436	1.97839	0.452114	-0.303432	0.321426	2.76278	2.61827	-0.295197	2.57266	0.378169	2.61866	2.78613	3.39852	3.42096	2.70569	2.78513	0.242394	-0.0945291	-2.28187	0.330716	-0.926999	2.26611	-0.538896	-0.043305	2.69947	0.290332	2.50221	0.531886	-0.141925	0.299958	-0.180597	2.80588	-2.49617	-0.037151	-0.0150827	-2.45456	-0.376581
Neural Progenitor Cell;SB-216763;trt_cp;1.11 uM;24 h	0.033025	0.318207	0.0137824	-0.180821	0.11255	0.097478	-0.142055	-1.75358	0.217574	0.414989	0.15438	-0.145633	-2.95167	-2.68012	-0.560029	-0.0571343	0.11084	-0.380147	-0.0796788	0.123659	0.47848	0.283957	0.618275	0.474778	-0.228023	-0.375437	-0.0465009	0.943784	-0.494052	2.6298	-0.719394	0.398121	0.432029	-0.0861603	-0.140683	-0.179449	-0.26266	-2.54118	-0.585128	2.48065	-3.69883	0.376166	-2.32786	-2.7745	0.467963
Neural Progenitor Cell;sunitinib;trt_cp;1.11 uM;24 h	0.140125	0.429238	0.414672	0.274546	0.751975	-0.189917	0.285812	-2.21978	-0.0493735	0.213727	0.00352166	0.548449	0.14756	-2.29267	-0.0350769	-0.104672	0.166299	-0.13809	2.38781	2.89212	1.1064	0.375911	0.433267	0.509552	-0.18428	-0.395366	-0.0732458	0.694378	-0.472526	3.14355	-0.773484	-0.0495274	1.25469	0.392108	-2.65245	-0.397711	-0.465636	-0.208268	0.187423	2.85746	-3.82313	-0.207494	-2.29943	-2.66254	0.149465
Neural Progenitor Cell;HMN-214;trt_cp;1.11 uM;24 h	-1.9719	0.00109602	-0.199493	-2.34044	-0.310822	-2.37324	-2.14977	1.9257	-0.198468	-0.0663861	0.270246	-0.386124	0.0305597	-0.129105	0.119347	-0.0902804	-0.24216	-0.189935	0.051357	-0.0855835	0.657587	0.322996	-0.314628	0.787316	-1.93435	0.633413	0.335746	0.649921	-0.265736	0.784496	-0.292458	0.6314	2.87026	-0.24802	0.587149	0.374201	0.232263	-0.416918	-0.176227	0.324378	0.199022	0.626564	0.76244	0.210321	3.40058
Neural Progenitor Cell;GSK-2334470;trt_cp;1.11 uM;24 h	2.14306	2.80662	2.09334	2.52566	1.9444	0.0980125	2.50208	-0.615162	2.19939	2.57814	2.6289	0.626075	0.0999005	0.225648	0.53393	0.372184	-0.0444486	-0.133981	0.515711	2.31226	1.11998	0.408154	0.520823	0.574	-0.19101	0.160194	0.0580633	1.03194	-0.381511	0.915555	-0.14128	0.164645	3.40194	-0.0262941	0.749252	0.0023562	-0.213275	0.0104308	-0.405238	0.550194	-0.132769	0.410892	-0.156277	0.195899	1.04391
Neural Progenitor Cell;CC-401;trt_cp;1.11 uM;24 h	-1.99002	0.37189	0.279003	0.101224	-0.235835	-2.16396	-0.347007	-0.540135	-2.04692	0.405542	2.66604	0.295182	-0.0145698	0.277079	0.571759	2.21632	2.27523	-0.347209	-0.0485721	2.40263	1.20828	3.18713	0.494668	2.844	2.10709	0.059481	-0.612476	0.351251	-0.757405	2.24029	-0.403221	0.332115	3.41751	-0.0645845	2.52851	0.0850318	-0.386839	-2.32077	-0.424288	-0.434645	-2.3573	0.237644	2.44892	0.0440792	2.77264
Neural Progenitor Cell;quizartinib;trt_cp;1.11 uM;24 h	0.438212	1.85587	0.31211	-2.09898	0.0259471	-0.0587117	0.512571	-2.07043	0.390233	0.0566416	2.54996	0.209675	-0.266168	-0.347358	0.0884184	2.0113	0.163688	-0.170445	-0.249134	0.186608	0.841055	2.74789	0.460299	0.753141	-0.0152692	-0.320007	-0.336905	0.895526	-0.568975	2.72758	-0.435443	0.16467	0.435413	-0.129348	-0.0819608	-0.182516	-0.225484	-0.041091	-0.807459	2.17991	-3.73617	-0.14572	-0.275594	-2.90313	0.0166297
Neural Progenitor Cell;staurosporine;trt_cp;1.11 uM;6 h	-0.51867	-0.479082	-0.691196	0.07634	-0.780893	-0.414042	0.153393	2.32379	-0.556226	-2.71859	0.930853	3.44361	-0.0641782	-0.0782938	0.533876	0.808474	-3.42996	-0.899625	-3.03013	-0.898276	-0.48094	-3.21497	0.0163904	-2.80388	0.437366	-0.157266	0.02145	0.69932	0.863426	1.03318	0.0551353	0.862587	1.24007	-4.18882	1.08029	-0.409132	0.402774	-0.711044	-0.482344	0.425773	0.456098	-0.320494	2.58446	-0.00858323	0.261987
Neural Progenitor Cell;PHA-767491;trt_cp;1.11 uM;24 h	2.40499	2.60042	2.28224	-0.0656021	0.423461	0.590269	0.0651811	0.145326	0.965444	2.29949	0.168405	-0.138798	-0.114861	0.000192257	2.63807	-1.85339	3.46168	0.0219961	0.213631	0.508626	3.55697	3.04755	0.113352	3.14907	0.0251522	-2.55614	-2.75052	0.245287	-0.768597	2.58202	-0.532376	-0.14619	2.3291	0.680516	-1.83869	-0.0203193	-0.436272	-2.369	-0.323215	0.0512627	-3.01002	-2.38044	-2.26011	-2.71423	-0.117816
Neural Progenitor Cell;JQ-1-R;trt_cp;1.11 uM;24 h	-0.305667	2.39187	1.8208	-0.238357	0.0701822	-0.259175	-0.306856	-0.348138	0.356177	1.7636	2.90223	0.159387	0.395595	2.46743	2.75175	-0.0290051	2.71383	0.173396	0.264329	2.63475	3.17318	3.39222	0.429372	2.8135	0.273566	-0.377068	-2.63739	0.208749	-0.580368	2.43471	-0.3603	-0.195535	2.61711	-0.0896233	2.02992	-0.0917132	-0.283849	-2.45703	-0.219282	0.160245	-3.24184	-1.99001	-2.13434	-2.85114	0.10168
Neural Progenitor Cell;SAR-245409;trt_cp;1.11 uM;24 h	0.640399	0.578944	0.605455	-0.123125	0.711323	0.20161	0.380991	-0.543669	0.465137	0.524868	-0.160883	-0.258559	-0.452598	-2.79467	-0.10735	-2.60828	0.126494	-0.3669	0.0808338	0.41804	0.87348	2.84115	0.50217	0.34743	-0.111556	-2.43318	-0.0229299	1.24212	-0.635007	3.1053	-0.54851	0.176867	0.774657	0.350483	0.275915	0.330537	-0.0958768	0.406111	-0.305316	2.71888	-3.21573	0.256184	-0.594628	-0.0520519	0.167817
Neural Progenitor Cell;NVP-BHG712;trt_cp;1.11 uM;24 h	-0.189573	2.3001	1.75436	2.09155	0.318102	0.366771	-0.0518133	-0.960724	0.371463	1.91934	0.341158	0.170586	0.502741	2.54256	2.53119	-0.231927	2.51027	0.508089	0.267478	0.303909	3.49666	3.20989	2.82253	2.84342	0.211241	-0.409902	-2.27668	0.351878	-0.747344	2.26137	-0.445729	-0.186102	3.09034	0.166244	2.14636	-0.0684664	-0.259049	-0.227108	-0.144899	0.216671	-2.84847	-0.31766	-2.49899	-2.42143	-0.440314
Neural Progenitor Cell;FR-180204;trt_cp;1.11 uM;24 h	-0.314883	0.0929181	-0.170679	-0.361994	-0.409607	-0.265273	-0.524718	-2.11001	-0.281069	-0.091746	0.167416	0.198015	-0.592603	-2.80839	0.0923926	-0.325232	-0.39573	-0.614301	-2.49	-0.487012	0.321398	0.00837038	-0.0915733	-0.129987	-2.36574	-0.568601	-0.302091	0.5986	-0.51203	2.78093	-0.630967	0.439842	0.619289	-0.274942	-0.268219	-0.563584	-0.691965	-2.7666	-2.11972	-0.0991868	-3.947	-0.118936	-2.60639	-3.00429	0.381623
Neural Progenitor Cell;rucaparib;trt_cp;1.11 uM;24 h	-0.297004	2.61578	2.12645	2.41795	-0.0710104	-2.22068	-0.0933744	-0.622539	-0.00174151	0.485467	2.83825	0.0890189	0.135601	2.47741	2.53323	0.193459	2.73911	-0.0299904	2.54119	2.42252	3.66707	3.48732	0.449318	2.75766	-1.87653	-0.0569756	-2.57971	0.381957	-0.668422	2.38881	-0.406598	0.175373	3.17137	0.0244343	2.6912	0.0608172	-0.629048	-2.56966	0.0153225	1.73535	-2.4048	0.107553	1.98465	-2.61277	2.43331
Neural Progenitor Cell;methylstat;trt_cp;1.11 uM;24 h	-0.875018	-0.0871025	-0.615887	-0.184695	-2.52396	-2.19515	-0.424891	-0.3721	-1.93609	-0.357349	0.450448	-0.0196396	-0.0175318	0.158918	2.25188	0.426777	0.406262	0.348691	0.340014	2.54374	2.98918	3.79451	0.278292	3.16853	0.472984	0.260348	-2.2853	0.169833	-0.762754	2.33769	-0.546884	0.170274	3.06297	-0.220458	2.71739	0.114456	-0.345742	-2.21068	-0.492603	2.55065	-0.264368	1.86456	2.42798	-2.58836	2.54647
Neural Progenitor Cell;C-646;trt_cp;1.11 uM;24 h	-1.94502	0.172948	0.0776611	-2.17766	-0.46647	-2.02064	-0.603133	-1.13424	-2.15596	0.38929	0.617364	0.163806	0.00431277	2.56857	2.74423	-0.249136	2.41486	0.251671	-0.168681	0.174861	3.04781	2.981	0.211247	0.698446	-2.15954	-0.475082	-2.77231	0.307465	-0.713453	2.34085	-0.5183	-0.0637341	2.53714	0.212483	2.1454	0.103316	-0.461838	0.436094	-0.127109	0.437964	-2.93835	0.207724	-2.35923	-2.54795	-0.286515
Neural Progenitor Cell;okadaic-acid;trt_cp;1.11 uM;6 h	-2.70676	-2.68932	-2.73943	-2.884	-2.83454	-0.491105	-2.30375	2.2937	-2.41941	-2.58303	0.220476	3.34641	-0.516193	-0.25918	0.499867	0.109314	-3.63453	-0.693464	-0.488276	-0.850097	-0.800095	-3.29547	-0.602302	-2.90967	0.560272	0.454756	0.484662	0.888213	0.250247	0.726708	0.157872	1.0532	0.897898	-4.15983	0.538943	1.00476	1.15078	0.486484	-2.43718	1.2335	-0.320981	0.21425	0.454925	0.401201	0.945763
Neural Progenitor Cell;ABT-737;trt_cp;1.11 uM;24 h	-2.52181	-0.101807	-0.247248	-2.59247	-2.66476	-2.37733	-2.53832	-0.565795	-2.47983	-0.254328	0.025986	-0.0899652	-0.329959	-0.288099	-0.193583	-2.20833	-0.366666	0.0152159	0.168492	-0.181114	0.507137	0.625777	0.159968	0.17539	0.208892	-0.40863	-0.16637	0.742435	-0.495495	2.56178	-0.680515	0.491562	3.30973	-2.45005	0.41058	0.170068	-0.362515	-0.0327102	0.265869	2.65065	-2.74022	2.39245	-2.48252	0.272604	2.78269
Neural Progenitor Cell;iniparib;trt_cp;1.11 uM;24 h	0.123035	2.37189	2.19076	2.05113	0.00666288	-1.90094	-0.119995	-0.230573	-1.9579	2.30443	0.228849	-0.121905	0.223945	2.70442	2.17865	-0.35734	2.48873	0.545344	2.87381	2.31778	3.36447	3.12343	2.56921	0.752993	-0.433317	0.138057	-0.141726	0.58781	-0.458171	2.49377	-0.673985	0.189051	3.2054	0.289275	2.28955	0.455104	-0.202624	0.261961	0.0060909	2.69211	-2.4954	2.03447	-2.25647	0.0906507	2.89631
Neural Progenitor Cell;dasatinib;trt_cp;1.11 uM;24 h	-0.311128	2.39426	-0.331815	2.27814	1.98042	-2.17164	0.233394	-0.689267	-0.0401149	-0.281124	0.460024	0.0741497	-0.218278	-0.0481149	0.188394	0.0233257	2.61513	0.172037	2.11144	2.27305	3.36359	3.52918	3.15605	0.54366	-0.013651	-0.186131	-0.332896	0.804926	-0.638084	2.55708	-0.500849	0.0705495	2.85481	0.220596	2.47979	-0.215147	-0.475766	-0.193958	-0.259071	2.57062	-3.15644	-1.9868	-2.4043	-2.74483	-2.60371
Neural Progenitor Cell;QL-XI-92;trt_cp;1.11 uM;24 h	-0.329013	2.07369	1.94133	-2.12883	-0.240233	0.192802	-0.342662	-0.526372	-0.167774	2.00084	2.70973	0.141063	0.479769	2.81028	3.01715	0.307447	2.33967	0.0363647	0.294576	0.411851	3.42829	3.35421	2.96115	2.97163	-1.66416	0.096621	-2.28144	0.271203	-0.789982	0.304205	-0.333728	0.381331	2.92435	0.260847	2.76861	0.33073	-0.182881	-2.70476	-0.600962	2.07508	-2.20941	2.29055	2.11727	-2.30642	2.62986
Neural Progenitor Cell;AZD-7762;trt_cp;1.11 uM;24 h	-2.33016	0.209721	-0.0759723	-0.127049	-0.575716	-0.186722	-2.25217	-0.65356	-0.420538	0.253503	2.68283	0.151715	0.000871013	0.0611049	0.362495	2.24323	2.24215	-0.236727	2.42719	2.58772	1.2415	3.51203	0.680121	2.93355	0.434088	-0.0558299	-2.38784	0.658737	-0.49864	2.21402	-0.416116	0.143947	2.95851	-0.152784	2.42222	-0.0513582	-0.59463	-2.5211	-0.319321	2.34019	-2.4757	2.24286	-0.0742446	-2.19341	2.3133
Neural Progenitor Cell;KIN001-244;trt_cp;1.11 uM;24 h	2.50474	2.64642	2.28422	0.276297	2.15547	0.385245	2.28025	-2.11333	2.28539	0.678296	-0.00284159	0.561456	-0.254309	-0.251744	2.25098	0.119312	2.69384	-0.025561	2.57402	2.6551	3.35916	3.2842	0.810503	3.09077	0.62924	-0.555658	-0.690288	0.849014	-0.867002	2.49102	-0.655517	-0.0674142	0.444383	0.334409	0.488139	0.0253575	-0.249651	0.253768	-0.654993	2.982	-3.47189	-2.48018	-2.2252	-2.68398	0.114021
Neural Progenitor Cell;AZD-1480;trt_cp;1.11 uM;24 h	-2.84356	-2.34928	-2.66135	-2.74958	-2.92029	-2.67409	-2.57675	-2.4493	-2.73071	-2.10141	2.61447	0.258923	-0.457656	-0.449386	0.147855	-0.113534	-0.49639	-0.0150087	-2.43365	-2.44253	0.141687	0.122695	-0.139541	-0.0975764	0.43548	-0.031935	-0.00966506	0.56639	-0.436141	0.803524	-0.287939	0.418297	1.04877	-2.89387	0.370513	-0.09426	-0.130435	0.317959	-0.449954	2.17234	-3.02798	0.716755	-0.403013	0.181188	2.51427
Neural Progenitor Cell;GSK-461364;trt_cp;1.11 uM;24 h	0.474743	0.34371	0.344	0.119021	0.3583	-0.154982	0.230988	0.0769647	0.324255	0.86307	2.55761	0.104812	0.0400883	0.148748	2.67127	-1.81763	0.3821	0.0965905	2.83265	2.46425	0.981822	3.08283	0.24821	2.85684	0.303865	0.135777	-2.23361	0.742086	-0.559255	0.42435	-0.370851	0.260154	1.22615	0.11483	0.760742	0.491163	-0.0685388	-0.49412	0.142574	2.64043	-0.0267908	0.49822	0.130744	-0.132643	2.92342
Neural Progenitor Cell;BRD-K55591206;trt_cp;1.11 uM;24 h	-2.87072	-0.0708439	-0.235334	-2.63265	-2.99082	-2.69667	-2.63975	-2.33372	-2.69004	-2.37484	2.546	-0.0308955	-0.114427	-0.153077	0.192971	-0.108513	0.0576292	0.181657	2.30483	-0.0776814	0.673401	2.98796	0.0443288	0.582904	0.0257042	-0.289537	-0.404192	0.174722	-0.461254	2.67787	-0.415562	0.552447	3.13184	-0.461232	-0.0283098	-0.12049	-0.522085	-2.44619	-0.0163578	-0.119136	-3.18941	0.521249	-2.3289	-2.22402	2.51207
Neural Progenitor Cell;ALW-II-49-7;trt_cp;1.11 uM;24 h	0.639485	0.650264	0.467807	0.137885	0.480875	0.258012	0.426782	-1.80126	0.571167	0.583267	0.176249	0.342038	-0.614588	-2.95132	-0.2521	-0.203902	0.157363	-0.319167	-0.351457	0.35346	0.505	0.412096	0.497558	0.40332	-0.116468	-0.684155	-0.249579	0.699763	-0.41471	2.98935	-0.433306	0.157123	0.478992	0.0399288	-0.376433	-0.444826	-0.10879	0.0391853	-0.59934	2.03801	-3.6782	0.0796657	-0.29147	-0.347087	-0.0651462
Neural Progenitor Cell;decitabine;trt_cp;1.11 uM;24 h	0.0631139	2.47895	2.41801	-0.0588485	-0.251414	1.95271	-0.141912	0.310162	0.178866	0.732288	2.94169	-0.0614236	0.40667	2.69921	2.64354	-0.0586229	2.91469	0.105649	0.760185	3.08639	3.66691	3.79582	0.387766	3.78077	0.226107	0.102818	-2.74173	-0.354715	-0.699758	0.00545523	-0.55227	-0.0417061	2.99902	0.72647	2.20572	0.0560458	-0.157193	-3.02014	-0.711715	-0.113218	-2.44509	-1.70081	2.86829	-3.06603	-0.285431
Neural Progenitor Cell;alectinib;trt_cp;1.11 uM;24 h	-0.746655	-0.204759	0.587846	-0.196512	-1.99532	-1.90066	-0.265911	-1.01287	-2.10742	0.608876	0.360706	0.352622	0.538974	2.98974	2.43807	-0.0684057	2.34666	0.352098	0.19588	0.631231	3.46338	3.57072	2.96693	2.91753	0.343821	0.060591	-2.29556	0.225797	-0.722851	-0.0706832	-0.57373	0.149362	2.96569	-0.165803	2.58283	0.0587423	-0.250671	-2.04955	-0.379434	-0.104242	-2.4856	0.056327	-0.0045005	-2.15627	-0.377879
Neural Progenitor Cell;KIN-001-220;trt_cp;1.11 uM;24 h	-2.35037	0.0141995	-2.52814	-2.43546	-2.67887	-2.54718	-2.08209	-0.352753	-0.36669	-1.92411	0.301636	-0.0928444	-0.483233	-0.55198	0.159922	2.11557	-0.535647	-0.489681	0.407566	0.136005	0.433698	2.77834	-0.102607	2.6397	2.36773	0.325566	0.0837758	0.831869	-0.650431	0.605636	-0.404253	0.577348	1.09875	-2.54071	1.00759	0.728886	0.44283	-0.393982	-0.620876	2.97339	0.136508	0.980975	2.91752	-0.361996	3.0853
Neural Progenitor Cell;AGK-2;trt_cp;1.11 uM;24 h	0.65613	2.72127	0.952085	0.662301	0.751157	-0.0207674	2.28444	-0.71712	0.737596	0.882339	-0.065512	0.0392632	-0.0492602	-0.00319228	0.16056	-2.44357	0.340226	0.193071	2.61843	2.48056	1.44036	2.86377	0.920751	0.372725	-0.302826	-0.157895	-0.403137	1.02899	-0.678786	2.75269	-0.597541	-0.0315416	3.59381	0.808203	0.588626	0.680063	-0.197664	0.214833	0.0991611	2.48513	-0.430765	2.40338	-2.53451	0.131762	2.61836
Neural Progenitor Cell;LY-2603618;trt_cp;1.11 uM;24 h	-1.98671	0.281393	-0.065665	-2.0546	-0.502795	-2.31695	1.98391	-0.346796	0.0755615	-1.92254	3.20655	0.441759	-0.0900815	-0.145532	0.569696	0.523389	-0.704425	-0.418756	-0.0334825	-0.0687713	0.260954	0.15709	-0.0344544	-0.0743912	-0.535365	0.245898	0.0269659	0.823747	-0.0831142	1.05242	-0.0519175	0.568311	1.31107	-2.88317	0.668108	0.0885966	-0.242977	-0.0316573	-0.448891	2.25706	-0.467773	0.595426	0.0543494	0.0466832	1.00986
Neural Progenitor Cell;TPCA-1;trt_cp;1.11 uM;24 h	2.61732	2.7773	2.77918	2.55999	2.94533	2.31662	3.03616	-1.94291	3.0057	2.70562	0.652626	2.84961	0.134409	-0.0356127	0.312529	-0.0271356	0.418326	-0.310362	0.23628	2.66912	1.15586	-0.00579975	0.728531	0.494851	0.536156	-0.388985	-0.631269	1.14051	-0.554796	0.957016	-0.593558	-0.468229	0.588691	0.361454	0.341686	0.0505939	-0.206704	0.518886	-0.285208	2.86633	-0.671584	-0.383549	-0.398346	-0.234532	0.489237
Neural Progenitor Cell;MGCD-265;trt_cp;1.11 uM;24 h	-0.659026	2.13135	1.69067	-0.138088	-2.30159	-1.93519	-0.327918	-0.639256	-1.81874	1.71373	0.277026	0.177161	0.318592	2.76929	2.68386	-0.0750946	2.62174	0.520929	0.0468816	0.262808	3.2787	3.23426	2.3812	2.69123	-0.0452144	-0.00699356	-2.53021	0.271656	-0.755233	2.13536	-0.371658	0.0131753	2.97891	-0.0294615	2.23035	0.125621	-0.295386	-0.520416	-0.360331	0.0695883	-2.48794	-0.282515	-0.076263	-2.55107	0.0634126
Neural Progenitor Cell;KIN001-260;trt_cp;1.11 uM;24 h	-0.570242	2.08851	0.472538	-0.15407	-0.291394	-2.08195	-0.42427	-0.661674	-0.139159	0.720024	0.347735	0.150942	0.0461094	2.61125	2.39536	-0.380565	2.76268	0.181801	0.119735	2.4287	3.45305	3.43271	2.61076	2.80662	0.338308	-2.03463	-2.39244	0.371828	-0.66941	-0.194012	-0.56559	-0.0501245	2.9441	0.38203	2.44727	0.271958	-0.122633	-0.215709	-0.0368067	0.110438	-2.50022	-0.0740682	-0.0901592	-2.36021	-0.365801
Neural Progenitor Cell;olaparib;trt_cp;1.11 uM;24 h	-1.93046	2.20261	0.242946	-0.107985	-2.23726	-2.26404	0.113133	-0.172853	-0.213004	0.202543	2.69671	0.391387	0.00701675	0.167019	0.235022	0.357044	-0.34108	-0.030421	2.17931	0.00122372	0.868227	0.727107	0.110976	0.5758	-1.92059	0.133826	-0.197129	0.793727	-0.416137	2.52723	-0.396469	0.480247	3.17791	-0.317166	0.680004	0.0237964	-0.0543315	-0.00610969	-0.412445	0.676182	-0.124634	0.643938	0.414592	0.272977	2.9441
Neural Progenitor Cell;AT-7867;trt_cp;1.11 uM;24 h	0.307436	-0.038605	0.191173	-0.0600129	0.0354717	0.301493	0.110786	0.253979	0.1132	0.299534	0.199191	0.187738	-0.0636672	-0.390254	0.292654	-0.0445781	-0.000642285	-0.634189	-0.0264897	0.0725434	0.862418	0.0145396	0.155118	2.59684	-0.379769	-0.0321224	0.121045	1.04125	-0.341753	0.575895	-0.46445	0.307462	0.548864	0.462881	-0.15099	0.151196	-0.0650638	-0.585296	-0.467477	0.00038712	-0.64466	0.392607	0.566992	-0.150509	0.543756
Neural Progenitor Cell;tivantinib;trt_cp;1.11 uM;24 h	0.311536	0.405406	0.122379	0.150823	2.65886	-2.48507	2.63753	2.17415	0.643352	0.165901	-0.184903	-0.480161	-0.666814	-1.29665	-0.080492	-0.171291	-0.621819	-0.833056	-0.28158	0.0271455	0.134447	-0.241974	0.327798	0.0209372	2.60763	-0.0282614	0.0650058	1.25539	-0.208396	0.952018	-0.532525	0.522698	0.515325	-2.79604	0.510712	0.767935	0.0847383	0.484883	0.178633	0.78149	-0.028984	0.0292227	0.0984929	0.071931	0.538889
Neural Progenitor Cell;cabozantinib;trt_cp;1.11 uM;24 h	0.353585	0.559343	0.402706	-0.00779728	0.245113	-0.228926	0.241889	-2.17853	0.220524	0.133084	0.303697	0.107206	-0.446777	-2.79886	0.266865	-1.81057	-0.0227671	-0.248837	1.90977	0.306249	0.468068	0.44637	0.28949	0.632863	-2.35919	-0.406633	0.00724382	0.720166	-0.510754	2.64554	-0.551137	0.265736	0.368212	-0.391141	-2.74984	-0.660721	-0.702348	-2.67857	-0.301231	0.0396108	-4.32145	-0.457717	-2.88121	-3.24027	0.112447
HSC;PD-0325901;trt_cp;1.11 uM;24 h	0.0846347	2.50455	0.321317	-2.16805	0.670129	2.17869	0.559088	2.33451	0.334651	0.187096	-0.119508	0.140937	0.268669	-0.201116	-0.0911369	2.82259	-2.1453	-0.175548	2.1434	2.0886	0.457105	0.786275	0.649412	0.237933	2.20868	1.68867	0.372747	1.08202	0.273253	-0.275274	-0.645117	2.58989	0.643722	1.92441	-0.335163	-3.18121	-1.50412	2.83717	3.66465	3.12225	-2.5784	0.644713	-3.23854	-0.0670738	0.798163
Neural Progenitor Cell;AST-1306;trt_cp;1.11 uM;24 h	0.150988	2.03282	0.235845	-2.06982	0.0350893	0.0146762	0.321565	-1.87159	0.114608	-0.0622548	0.430059	0.371558	-0.518979	-2.79199	-0.189885	2.19013	-0.403383	-0.320567	-2.04449	0.0123137	0.221044	0.331754	0.0796814	0.108898	-2.12219	-0.430757	-0.305285	0.59178	-0.258832	2.61929	-0.25197	0.157011	0.285052	-2.48342	-0.104976	-0.51257	-0.522783	-0.0530789	-2.69012	2.20805	-3.80366	-0.455937	-2.77662	-3.27304	-0.188523
Epithelial Cell;TCDD-dioxin;trt_cp;1.11 uM;24 h	-0.29079	-0.422189	-0.644542	-0.863928	-0.167927	0.141954	-0.288921	-0.362185	-0.128587	-0.0843528	2.98274	0.187114	3.30747	3.03145	0.785261	2.85735	-0.0918312	-3.07266	-3.02945	-0.47457	-3.0008	-0.426573	2.79355	-2.71442	0.616033	0.885579	0.286495	1.31566	0.932166	1.20994	0.45173	0.000890539	-2.76543	-3.78584	0.38908	-2.48678	0.107197	3.36066	0.614046	3.70521	0.011099	2.50919	0.541689	0.161155	0.453318
Neural Progenitor Cell;BAY-61-3606;trt_cp;1.11 uM;24 h	-2.682	-0.0952558	-0.35434	-2.38258	-0.717709	-2.74407	-2.44336	-2.06657	-2.71137	-2.4318	0.0148532	-0.0140149	-0.123717	-0.337891	0.0538614	-2.28204	-0.180659	0.0861975	2.4782	2.38143	0.919666	0.713314	-0.216238	0.649197	0.01146	0.49221	0.204242	0.179864	-0.71514	2.80469	-0.885519	0.758921	3.26543	0.125333	0.00355603	0.649835	0.115272	-2.91171	-0.348637	2.36642	-2.81287	0.426136	0.311716	-0.151464	2.87156
Neural Progenitor Cell;BRD-K29983336;trt_cp;1.11 uM;24 h	-0.363658	2.13667	0.808925	2.01745	0.311816	-1.76978	-0.0748019	-0.864249	0.0270986	2.09958	2.55865	0.454307	2.44736	2.57622	2.80278	-2.08251	2.15622	0.312284	2.54858	2.5569	3.27055	3.06718	0.499814	0.727568	1.61059	-0.0673587	-0.458066	0.552855	-0.726458	2.32815	-0.418102	-0.25914	3.21557	0.0688607	0.202135	0.267751	-0.130438	0.294885	-0.222865	2.46602	-2.54762	-0.379942	-0.188681	0.280608	2.62466
Neural Progenitor Cell;GW-5074;trt_cp;1.11 uM;24 h	-0.222385	0.343123	-0.0474652	0.123772	-0.0867474	-2.05509	-2.08471	-0.657498	-0.11818	-0.0508797	2.53615	0.343634	-0.143751	-0.159176	0.305059	-0.322692	-0.00251986	-0.233634	2.3848	0.07059	0.875716	0.288236	0.47494	0.51555	-0.504395	-0.0522832	-0.301282	0.805987	-0.460577	2.67801	-0.365365	0.244222	3.2014	0.12737	0.331548	-0.193729	-0.684568	-2.29131	-0.0900464	-0.0498558	-2.41305	0.380381	-2.5212	0.20515	2.90914
Neural Progenitor Cell;BX-795;trt_cp;1.11 uM;24 h	-0.229073	2.58209	2.07073	0.177799	-0.0249325	-0.447127	-0.069365	-0.338211	-1.80106	2.11023	0.397664	-0.236382	2.51867	2.78824	2.56462	-0.214547	2.7286	0.193205	0.270598	0.528188	3.83207	3.70936	3.09093	2.99951	0.192755	0.183274	-2.42327	0.672103	-0.791199	2.20144	-0.6596	0.11376	3.39595	0.401419	2.59976	-0.029898	-0.347757	-2.48828	-0.30626	2.77227	-0.567588	-0.377126	-0.0921707	-2.62487	-0.196928
Neural Progenitor Cell;serdemetan;trt_cp;1.11 uM;24 h	-0.392356	2.30318	0.78733	0.0503054	0.479503	0.0837482	-0.0599638	-0.229081	1.68655	2.06435	2.8425	0.448288	0.237316	2.61574	3.02992	0.103065	2.51595	0.187718	0.272581	2.76537	3.19113	3.23261	0.60377	3.03867	0.399504	-0.253603	-2.76503	0.336099	-0.658929	0.485876	-0.283149	-0.286941	2.71812	0.268145	2.20858	0.117132	-0.444161	-2.44966	-0.383306	0.0898945	-2.61433	-0.424649	2.12074	-2.8214	2.24821
Neural Progenitor Cell;NPK76-II-72-1;trt_cp;1.11 uM;24 h	0.512833	2.60385	0.457905	0.355676	0.661445	0.124821	2.48888	-0.942468	2.18566	2.32467	2.37248	0.201857	-0.610704	-0.304549	0.216302	-0.197726	-0.220236	-0.0944382	0.267648	-0.00466729	0.909352	0.526824	0.951715	-0.132479	-0.0150238	-0.081047	-0.322535	1.26437	-0.695775	1.07908	-0.590835	0.250208	0.859935	0.0710614	2.70649	0.446673	-0.138674	0.725008	-0.213692	3.03197	-0.234367	0.516859	-2.94191	0.0628672	0.400643
Neural Progenitor Cell;A-66;trt_cp;1.11 uM;24 h	2.32991	2.65582	0.96462	0.286156	2.31048	0.535361	0.768381	-2.03379	0.892935	0.844444	-2.53142	0.0791671	-0.0975472	-0.153071	-0.184284	1.9664	0.435063	-0.209261	0.451062	2.34968	1.18574	3.0889	1.12686	2.50416	-0.120609	-0.250524	-0.382587	1.25812	-0.461095	2.63113	-0.460372	0.428688	0.582757	0.0232025	0.77447	0.110319	-0.428814	2.13342	-0.281057	0.706143	-2.93274	-0.00711166	-0.281861	-0.0424747	0.167966
Neural Progenitor Cell;NU-7026;trt_cp;1.11 uM;24 h	-0.857306	-0.11632	-0.429486	-0.563692	-2.8921	-0.789134	-0.450205	-0.379357	-2.75596	-2.1762	2.95956	0.418705	0.0329273	0.120016	0.267267	0.47839	1.93127	-0.216304	-0.281284	0.372969	0.615342	2.91672	0.18963	0.241882	0.24933	-0.404407	-0.641807	0.493683	-0.345028	2.45344	-0.308129	0.241137	2.87449	-2.81902	2.02724	-0.686076	-0.716915	0.210319	-2.23732	-0.125866	-3.02247	-0.110273	-0.139983	0.169018	2.30152
Kidney Cell;chlortalidone;trt_cp;1.11 uM;24 h	0.390884	0.513272	0.315098	0.0350121	0.428268	0.0799548	0.897778	0.191076	0.362858	0.0134584	0.52333	0.577913	2.95651	2.52968	3.25554	2.80495	0.47877	0.348425	0.303478	2.53677	-0.0100951	-0.203251	0.287398	-0.2583	2.58043	0.253204	0.0121487	3.00835	0.168951	3.06119	2.25558	2.34151	-2.43517	-3.64499	0.712867	2.37561	-0.308611	3.13562	0.465782	0.776672	0.64117	-0.57476	0.28483	2.28351	0.199952
Neural Progenitor Cell;GSK-1059615;trt_cp;1.11 uM;24 h	-0.243488	2.28735	1.36869	0.135286	-0.282027	-1.96594	2.46665	-0.908182	0.335821	1.64773	2.57413	1.13065	-0.376891	0.0049596	0.301103	1.80997	-0.000870112	-0.0582434	-2.17413	2.06135	0.635641	2.45213	0.812565	0.119829	0.109006	0.0864926	-0.228397	0.94069	-0.614784	0.865558	-0.423674	0.165383	0.761329	-0.384144	2.40289	-0.191448	-0.235033	0.406232	-1.1323	2.35061	-3.03893	-0.0597826	-0.513581	-0.394532	0.476763
Neural Progenitor Cell;motesanib;trt_cp;1.11 uM;24 h	0.388152	1.9749	0.475497	-2.28105	0.0851167	-0.0429135	0.254387	-1.8792	0.428748	0.25253	2.26111	0.0120541	-0.0722894	-2.26118	0.0988229	0.0250476	2.52931	-0.447724	-0.0232316	2.61698	0.934138	3.307	0.582077	2.75964	-1.9692	-0.503448	-0.569451	0.508959	-0.668785	2.82412	-0.366541	0.139501	0.246356	-0.0895382	-2.03581	-0.506593	-0.390624	-2.61861	-0.777346	1.94128	-3.87881	-0.219474	-2.38658	-3.09647	-0.0230071
Neural Progenitor Cell;GSK-J4;trt_cp;1.11 uM;24 h	-0.230354	2.21338	1.8967	-0.327159	-0.185536	-2.01174	-0.49177	-0.464927	-0.0911304	0.782908	-0.0374688	-0.200157	0.472768	2.5482	2.63612	-0.392914	2.64181	0.412936	2.54755	2.4067	3.34411	3.60511	0.379153	2.82069	0.174599	0.0378435	-2.40249	0.325616	-0.675752	0.083212	-0.371344	0.0542577	2.78877	0.411112	2.04556	0.263816	-0.317574	-2.53751	-0.16907	0.177384	-3.00904	-0.230812	-0.358311	-2.64524	0.305311
Neural Progenitor Cell;SB-203580;trt_cp;1.11 uM;24 h	-0.290119	2.5437	2.08176	2.35903	0.779344	-1.99353	0.104711	-0.583581	0.307254	2.06481	0.193646	0.427869	2.47031	2.51508	2.69005	-0.158966	2.11443	0.340831	2.68581	2.43129	3.81545	3.49125	0.929275	2.58296	0.289825	0.0373907	-0.430147	0.804505	-0.738634	2.33764	-0.877268	-0.394271	3.73273	0.0987986	2.45375	0.178033	-0.256831	-2.25147	-0.0690835	2.43355	-2.76934	-1.72161	-0.172238	-2.35772	2.53515
Neural Progenitor Cell;vandetanib;trt_cp;1.11 uM;24 h	-0.0306644	0.132224	-0.0492265	-0.36623	-0.0587897	-0.0742762	-0.0153808	-2.17686	0.0906833	0.0334925	0.176645	0.0896199	-0.566722	-2.74008	-0.00140688	-0.276995	-0.078963	-0.305366	-0.110926	-0.146594	0.577393	0.463436	0.351457	0.352783	-0.408367	-0.125461	-0.0207771	1.1015	-0.522542	2.73648	-0.870028	0.331638	0.522555	-0.278535	-0.211189	-0.237595	-0.353215	-0.310016	-0.341478	2.52386	-3.66015	0.0201792	-2.34113	-2.67398	0.416484
Neural Progenitor Cell;A-769662;trt_cp;1.11 uM;24 h	-2.238	-1.96536	0.342216	-0.435922	-2.61229	-2.15909	-0.59676	-0.47042	-2.37951	0.255839	2.43014	0.63158	-0.0180205	0.162956	2.73724	-0.0715044	2.09123	0.203306	-0.267638	0.321491	3.05639	2.97914	0.204883	2.55505	-1.9929	-0.228826	-2.61489	0.297433	-0.776709	2.22582	-0.200224	-0.149145	3.34908	0.149453	0.128259	-0.321345	-0.63785	-2.53457	-0.934358	0.045422	-2.95281	-0.0345345	-2.37765	-2.58463	-0.0646582
Neural Progenitor Cell;lenalidomide;trt_cp;1.11 uM;6 h	-2.70412	-2.46825	-2.54509	-0.129428	-3.24655	-2.44887	-2.73377	2.39532	-2.70593	-2.24325	0.33526	0.542053	-0.0630095	-0.126103	0.610662	2.90279	-3.6859	-0.515865	-2.54416	-0.512439	-0.624306	-2.39868	-0.644768	-2.15457	0.21137	1.86522	0.305608	0.202233	0.278174	0.453533	0.185441	1.30981	3.52225	-4.02422	0.414072	0.105428	0.441728	-0.92483	-3.03924	0.791296	-0.142395	0.137579	3.222	-0.417921	2.77874
Neural Progenitor Cell;anacardic-acid;trt_cp;1.11 uM;24 h	-2.19675	0.200024	-0.0511411	-0.315729	-2.43832	-2.47479	-0.442428	-0.511171	-2.26219	-0.218867	2.64288	-0.203625	-0.154305	0.0898434	0.140302	1.78103	2.49649	0.0159086	0.0980737	2.49249	1.14858	3.16149	-0.0609522	2.72159	0.338278	-0.168581	-0.294421	0.353627	-0.410619	2.25775	-0.242423	0.379973	2.81191	-0.458449	0.29604	0.00966427	-0.0869334	-0.034829	-0.120377	2.28499	-3.08129	0.0270194	0.236901	-2.48929	2.48139
Neural Progenitor Cell;GSK-429286A;trt_cp;1.11 uM;24 h	0.20229	2.05646	0.249415	-0.0425858	0.113089	0.0328327	-0.321845	-0.298041	0.0660124	0.623202	2.46756	0.315246	0.434431	0.496097	2.9381	2.29525	0.209802	-0.256046	2.71721	2.58668	3.38678	3.09454	0.484739	3.36914	1.72061	-0.179669	-2.44289	0.823257	-0.739041	0.615403	-0.404104	0.0938556	2.97392	0.263629	2.90211	0.320958	-0.281426	-2.80054	-0.272697	2.27495	0.477872	0.25282	2.53744	0.164318	3.24729
Neural Progenitor Cell;bosutinib;trt_cp;1.11 uM;24 h	2.27434	0.364838	2.26813	2.50797	0.621177	-0.0783516	2.10485	0.400837	0.191282	0.191352	0.101352	0.597157	2.56933	-0.361891	2.4704	0.195999	2.70928	-0.0828739	0.22823	2.98231	3.2444	0.0105202	-0.365933	2.8004	0.405531	-0.220821	-0.101626	0.379652	-2.76711	2.54572	-0.845451	-0.114178	2.93808	1.0242	-0.334317	0.312815	-0.259138	-3.04107	-0.341046	-0.10913	-0.582571	0.00440019	2.47834	-2.66372	3.02354
Neural Progenitor Cell;PFI-1;trt_cp;1.11 uM;24 h	-0.694756	2.12796	0.353596	-0.0337001	-0.0989723	-2.59585	2.05175	-2.38864	-1.94408	-1.9796	2.60159	0.315297	-0.208746	-0.12993	-0.100502	0.0934165	-0.282356	0.45127	2.56065	0.134031	0.510596	0.672584	-0.0277952	0.189066	0.314983	-0.300604	0.0658346	0.423142	-0.314281	2.91071	-0.487834	0.278379	2.90795	-0.618242	-0.0503768	0.109376	-0.196687	2.45615	0.178128	2.44032	-3.23964	0.13662	-0.394393	0.195418	0.431911
Neural Progenitor Cell;CG-930;trt_cp;1.11 uM;24 h	-2.50863	0.126833	-0.0479979	-2.24232	-2.37373	-2.44915	-0.532259	-0.85339	-2.4277	-0.0322214	2.60999	0.272532	-0.246605	-0.0230693	2.43213	0.00864413	0.0358848	0.244275	2.25542	0.0604806	0.776157	3.07303	0.401555	0.531377	0.137703	-0.290089	-0.0703137	0.556396	-0.623847	2.71454	-0.469998	0.0768476	3.18042	-0.0690861	-2.34766	-0.409423	-0.755388	-2.5678	-0.142339	0.0112192	-3.73374	0.257682	-2.68701	-2.7365	-0.162794
Embryonic Stem Cell;doramapimod;trt_cp;1.11 uM;24 h	-0.0991238	0.318272	-0.0123514	0.172966	0.43133	-0.252194	-0.0343461	-0.00768614	0.228964	-0.100938	0.131808	-3.47995	-3.59446	-3.29791	-0.0180792	-0.555342	-0.200547	0.0588165	-0.101767	-0.610755	-0.11871	0.639296	-3.20834	-2.49758	-0.0857466	-0.100169	2.30679	-0.197849	-2.30504	0.468711	0.0139487	0.895266	-2.7594	-0.282452	-2.30225	3.16338	2.98773	-2.57703	2.61341	0.0652544	-4.03268	0.976085	-2.34798	-2.79406	-0.42899
Neural Progenitor Cell;Y-27632;trt_cp;1.11 uM;24 h	-0.421416	2.09578	0.44463	-0.142145	-0.401502	-1.84743	-0.652066	-0.605591	-2.10374	0.534586	0.592413	0.0917225	0.220719	2.47856	2.48929	-0.147402	2.58265	0.335731	0.262343	0.411143	3.09487	3.31432	0.11824	2.91649	0.0821529	-0.420305	-2.4206	-0.133291	-0.564931	2.42353	-0.506884	0.195812	2.55612	0.189112	2.06569	0.285891	-0.167826	-2.19907	-0.00568065	0.300338	-2.90416	-2.29328	-0.498791	-2.57349	-0.159016
Neural Progenitor Cell;CTB;trt_cp;1.11 uM;24 h	-0.346208	2.43954	1.96406	2.2878	0.168266	-2.05031	-0.315925	-0.732453	0.0573007	0.607047	0.311993	0.0246605	0.216214	0.169734	2.58557	-0.552301	2.57949	0.451616	2.47637	2.36827	3.26577	3.21619	-0.0628217	0.746911	0.164914	-0.289469	-2.38044	0.0975902	-0.629709	2.37692	-0.538537	0.0735273	2.99014	0.0523685	2.34669	0.144626	0.0482681	0.0327736	0.179273	2.44165	-2.76876	-0.376893	-2.13861	-0.129314	2.92165
Neural Progenitor Cell;KI-20227;trt_cp;1.11 uM;24 h	-0.0314612	0.250681	0.0846834	-0.0793488	0.201367	0.123551	2.05045	-0.798004	-0.00421377	0.47788	2.72414	0.411584	0.0309337	0.137976	0.577623	2.41066	-0.15439	-0.026366	2.84639	2.57103	0.838589	2.97996	0.807848	2.67417	-0.198153	0.212862	-0.244671	1.06378	-0.240959	0.900264	-0.234856	0.196968	1.1076	-0.321715	0.294868	0.132801	-0.247049	-0.024231	-0.330946	0.233503	-0.571052	0.534948	0.165608	0.367544	0.768559
Neural Progenitor Cell;MLN-0128;trt_cp;1.11 uM;24 h	2.67808	2.59583	2.36371	0.233623	2.12525	0.320397	2.51173	-0.166742	2.47126	2.30004	2.36438	2.13262	-0.252238	-0.247465	0.246633	2.45671	0.316831	-0.440437	1.95128	2.61746	0.576111	2.46902	0.509039	2.24647	2.43476	-0.099995	-0.256131	0.998677	-0.577265	0.720276	-0.264928	0.102363	0.401351	-2.33627	0.731671	-0.18385	-0.176043	0.33831	-0.991528	2.61621	-0.658182	-0.439629	-0.0745912	-0.508738	0.798186
Neural Progenitor Cell;KU-60019;trt_cp;1.11 uM;24 h	1.75913	2.2809	0.524942	0.288818	-0.013352	0.104325	1.85099	-0.791648	-0.114423	0.242568	2.66793	0.340674	0.291732	2.65642	2.81821	2.06781	0.354032	0.085392	2.63073	2.31627	3.39961	2.76444	0.699319	2.76971	-1.56294	-0.394236	-2.43705	0.801503	-0.201601	2.54489	-0.568532	0.121078	3.07197	0.175502	0.351921	-0.0203998	-0.543119	0.0753209	-0.0370293	2.2024	-2.52056	0.370228	-2.48702	0.365059	2.42976
Neural Progenitor Cell;PD-0325901;trt_cp;1.11 uM;24 h	2.20974	2.46696	2.65462	0.199455	0.214491	0.00113097	-0.0510465	0.207163	0.200623	0.331263	2.5458	0.667854	-2.60216	0.00336174	-0.157354	-0.0118767	-0.0370707	-0.0552854	-0.288749	-0.243851	0.857988	2.31597	-0.36111	2.95883	0.187302	-0.735652	-0.710232	0.597414	-0.789045	2.49656	-0.844821	-0.495258	2.88975	-0.273599	-2.33052	-2.99205	-0.920504	-2.87794	-2.16689	0.219572	-3.32207	-2.81895	-2.74787	-3.07732	3.06169
Neural Progenitor Cell;garcinol;trt_cp;1.11 uM;24 h	-2.35156	-0.101203	-0.429075	-2.59553	-0.912532	-2.44931	-2.40039	-0.642205	-0.601154	-0.262737	2.42406	-0.126163	-0.558708	-0.155723	0.0847389	-0.140074	-0.179277	-0.246111	0.209111	-0.236928	0.780892	2.78395	0.205108	0.594246	-2.11799	0.0419333	-0.341101	0.825395	-0.710336	0.729182	-0.665284	0.402712	3.08702	0.0437648	0.677624	0.123589	-0.244791	-0.167085	-0.106267	2.45297	-0.469951	0.95277	0.0900369	0.0696937	2.69723
Neural Progenitor Cell;JNJ-38877605;trt_cp;1.11 uM;24 h	-2.72364	-2.14962	-2.41309	-2.42939	-2.753	-2.53999	-0.617326	-2.37067	-2.47602	-2.06605	2.77307	0.441539	-0.202242	0.0268082	0.367884	1.91362	0.109636	0.0407688	-0.0325739	2.3925	0.579843	3.20467	0.346167	2.54824	-0.0398986	-0.0711332	-0.21715	0.0935356	-0.536936	2.43187	-0.181782	0.177903	3.03441	-2.8718	2.29717	-0.390752	-0.472047	-2.25249	-2.58303	0.128161	-2.97757	1.96086	2.08679	-2.55423	-0.175329
Neural Progenitor Cell;ALW-II-38-3;trt_cp;1.11 uM;24 h	-1.80044	2.07126	0.435974	2.22997	-2.07411	-1.94288	-0.00739463	-0.666175	-0.144995	0.206074	2.66374	0.354898	0.224132	0.159341	0.564069	0.260127	-0.262615	-0.0114092	2.08387	0.172143	0.73829	0.507579	0.428342	0.641771	0.262079	0.00257213	-0.299427	0.28394	-0.232105	2.42628	-0.191883	0.261124	3.12251	-0.469655	0.412491	-0.251629	-0.272166	-0.128104	-0.562231	0.221025	-2.74881	-0.138671	0.0829984	0.0469881	2.42452
Neural Progenitor Cell;GSK-J1;trt_cp;1.11 uM;24 h	1.73423	2.21724	2.21879	2.22181	-0.0793279	-0.042989	-0.200224	-0.33636	0.00216478	2.27128	0.351833	-0.196972	0.0330986	2.35293	2.25257	-0.450391	2.86252	0.422527	2.95553	2.81644	3.69348	3.47744	0.381625	2.82646	-1.69564	0.0462328	-2.265	0.172225	-0.615989	2.32855	-0.311348	-0.0548233	3.04082	0.556946	2.16135	0.555877	0.0504362	-2.35318	-0.0161463	2.57365	-2.66273	2.01644	1.88904	-2.29302	2.59641
Neural Progenitor Cell;XMD-892;trt_cp;1.11 uM;24 h	-2.30115	0.257334	-0.271772	-0.165833	-0.0765709	-2.44072	-2.12539	-0.998753	-0.170585	-0.0673435	2.26977	0.333047	-0.679514	-0.667405	0.0920734	-0.187258	-0.30816	-0.0755445	0.149911	-0.171314	0.438372	0.348593	0.349332	0.239526	2.10746	0.0568061	-0.0777678	1.07024	-0.857647	0.786913	-0.410741	0.363987	0.743054	-0.448666	2.51983	0.230782	-0.389063	0.144417	-0.289242	2.72474	-0.433194	0.561235	-2.39928	-0.0577563	2.46108
Neural Progenitor Cell;doramapimod;trt_cp;1.11 uM;24 h	2.17344	2.43828	0.865217	0.397726	0.671001	0.0657582	0.456168	-1.84917	0.437676	0.514892	0.197346	0.0910925	-0.0787643	-2.1697	-0.0092282	0.105078	0.467929	-0.171646	2.18641	2.48095	1.11855	2.97907	0.720615	2.40749	-1.89369	-0.438058	-0.223254	0.831027	-0.575175	2.8155	-0.525664	0.257851	0.745378	0.0290635	-0.202212	-0.278417	-0.266332	-2.33287	-0.40599	2.39265	-3.81652	-0.212785	-2.44389	-2.73299	-0.140224
Embryonic Stem Cell;BMS-777607;trt_cp;1.11 uM;24 h	0.0771162	0.472324	0.220895	0.396062	0.741384	-0.0411045	0.230325	0.1933	0.448417	0.108585	0.252041	-3.47667	-3.53111	-3.16468	-0.00714886	-2.72475	-0.021162	0.116999	-0.201539	-0.489312	0.0743675	0.401297	-3.14575	-2.57422	-2.30758	-0.0834547	0.35799	2.31248	-2.35833	0.66875	-0.0949321	0.699375	-2.68787	-0.183831	-2.23316	3.3093	3.09915	-2.50235	2.53313	0.0121326	-4.09391	2.42777	-2.70555	-2.79991	-0.190253
Embryonic Stem Cell;tivantinib;trt_cp;1.11 uM;24 h	0.0101505	0.278853	0.134478	0.00845604	0.290063	-0.0460493	0.0148053	2.34704	0.265981	0.0163513	0.115003	-3.39242	-3.61723	-3.26192	-0.0782359	-2.67379	-0.0181901	-2.47566	-2.6243	-3.06185	-2.86051	-0.0982081	-3.35251	-3.11449	-0.171784	-0.0123464	0.296774	2.49906	-2.4091	0.464417	-2.37983	0.90536	-2.68951	-0.342222	-0.116832	3.12796	3.24047	-0.512847	0.682752	2.3991	-3.74031	1.1363	-2.79453	-2.70816	0.15833
Embryonic Stem Cell;SGI-1776;trt_cp;1.11 uM;24 h	0.0555394	0.613326	0.283753	0.440184	2.92004	0.0172273	0.0690944	0.0858785	0.637936	0.312335	0.21312	-3.60382	-3.57854	-3.24751	-0.0657673	-2.81295	-0.00490448	0.240074	-0.228262	-0.613583	-0.0574335	0.173264	-3.07899	-2.67225	-2.42788	-0.0988379	0.24908	0.0409304	-2.2329	0.531782	0.0104979	0.620965	-2.70369	-0.125922	-2.26411	3.28502	3.25384	-2.39372	2.80654	0.056565	-3.93846	2.77911	-2.71159	-2.59374	-0.194883
Neural Progenitor Cell;ischemin;trt_cp;1.11 uM;24 h	-0.323548	2.09738	-0.342759	-0.535948	-2.18917	-2.08674	-0.130654	-0.619565	-0.482961	1.82116	2.73833	0.202142	0.451147	2.53376	2.64717	-0.0651429	2.10457	0.0484064	-0.0636118	2.25674	2.70223	3.11775	0.137319	2.34327	0.579954	0.134525	-0.544251	0.256652	-0.603243	2.36224	-0.225437	0.240212	2.65724	-0.430794	2.37221	0.265353	0.0739812	0.285824	-0.525659	2.55831	-2.9795	-2.05196	0.0602464	-2.63477	2.35694
Neural Progenitor Cell;tranylcypromine;trt_cp;1.11 uM;24 h	-0.236945	2.20199	1.67857	2.12815	0.263241	-0.537261	-0.105327	-0.177678	0.195211	1.79041	2.74686	0.403828	-0.13439	0.127665	2.39372	-0.102117	0.327974	0.304345	-0.102875	0.117919	3.1169	2.80025	0.533373	0.619472	-1.76747	-0.100735	-0.507184	0.968012	-0.547691	2.32331	-0.47	0.00827843	2.93973	0.110166	0.366245	0.053884	-0.47003	-0.0327095	0.042565	2.49888	-2.64583	0.535255	-2.4437	-2.44661	2.61852
Neural Progenitor Cell;TAK-715;trt_cp;1.11 uM;24 h	-0.41366	2.12238	0.510254	-0.195192	-0.474388	0.118956	-0.365761	-0.358872	-0.315243	0.488081	0.41648	0.118934	0.253643	2.51822	2.58222	-0.0495861	2.35166	0.293376	0.128532	0.440996	3.14684	3.27286	0.207029	3.08571	0.360882	0.0246537	-2.39343	0.532957	-0.800016	-0.19212	-0.52145	-0.0168478	2.99331	0.241555	1.96048	0.284135	-0.0537746	-2.80831	-0.439491	0.357147	-2.65925	0.25574	0.159134	-2.78295	-0.14415
Embryonic Stem Cell;MLN-0128;trt_cp;1.11 uM;24 h	-0.339781	0.0894133	-0.374487	-0.295117	-0.16797	-0.375562	-0.454246	-2.42377	-0.072533	-0.291433	-3.13744	-3.87774	-4.07476	-3.85791	-3.33944	-2.8874	-0.831042	-0.131898	-0.824391	-3.95353	-3.47699	-0.581943	-3.63557	-0.714567	-0.166403	-0.0390126	2.59826	0.20678	-2.69594	0.401613	0.593164	1.50953	-3.29507	0.116173	0.745812	3.49563	4.0739	0.105689	0.395543	2.53511	-0.520713	3.35631	-2.66028	0.421756	2.5163
Neural Progenitor Cell;D-4476;trt_cp;1.11 uM;24 h	-0.362159	2.28954	1.96561	2.4804	0.162459	-1.90521	-0.0538464	-0.598325	-0.241868	0.693985	0.253798	0.587739	2.62493	2.60677	2.45227	0.0216997	2.24925	0.428298	-0.112629	0.255659	3.43554	3.24474	0.706012	2.6759	0.400056	-0.346243	-2.40735	0.380351	-0.692043	-0.267057	-0.706045	0.0404524	3.47781	0.160455	2.59381	0.313105	-0.510852	-2.11306	0.0608524	2.2887	-2.54844	-1.86564	-2.40449	0.339012	2.36879
Neural Progenitor Cell;regorafenib;trt_cp;1.11 uM;24 h	-2.67914	0.210873	-0.381694	-0.0054749	-0.45647	-2.64486	-2.28875	-0.983225	-2.31058	-2.10835	2.72548	-0.214513	-0.751112	-0.387724	-0.238416	-0.0520952	0.00468124	0.244738	-2.33592	-0.241751	0.502647	2.78882	0.016331	0.45217	0.156448	-0.188956	-0.173191	0.477577	-0.545953	2.37577	-0.397702	0.0595962	3.07406	-2.50686	-1.98815	-2.64106	-0.482364	-2.27449	-0.0348622	0.0103512	-3.36052	0.556462	-2.78893	-2.82645	2.46938
Neural Progenitor Cell;WZ-4002;trt_cp;1.11 uM;24 h	2.06782	2.3707	2.01197	1.93201	2.05665	0.219041	1.98296	-1.94142	1.91225	0.520928	2.49249	0.753167	-0.145312	-2.27101	0.188649	-0.10748	0.198384	-0.196949	-0.0913958	2.22594	0.643051	2.53407	0.623496	0.212955	-2.16671	-0.0689188	-0.33553	0.935712	-0.466767	2.57266	-0.502463	-0.0302316	0.294655	-0.2531	-2.34783	-0.715632	-0.70964	-0.051916	-2.35318	2.34332	-3.95579	-0.629851	-2.94323	-2.99326	0.254806
Embryonic Stem Cell;motesanib;trt_cp;1.11 uM;24 h	0.0952003	0.47188	0.243078	0.329169	0.705075	0.0110825	0.181209	2.26954	0.475935	0.273173	-0.00432364	-3.4777	-3.48052	-3.11276	-0.194405	-2.82911	-1.23867e-05	-0.326774	-0.408879	-0.78489	-0.107273	0.0187245	-3.16407	-1.18299	-2.57567	-0.127462	0.556926	2.56282	-2.37937	0.599344	-2.30143	0.83685	-2.62602	-0.0111549	-2.36241	2.93472	3.07405	-2.56571	2.502	-2.23801	-3.95049	0.86703	-2.83426	-2.67392	-0.0699675
Embryonic Stem Cell;WZ-7043;trt_cp;1.11 uM;24 h	-0.201925	0.148213	-0.0405836	0.0257342	0.484346	-0.208557	-0.0651475	-0.130947	0.319514	-0.109078	0.114649	-3.56523	-3.50992	-3.04456	-0.152907	-2.93482	-0.140162	0.256733	-0.625985	-3.03453	-0.289291	0.24205	-3.27882	-1.14712	-0.184816	-0.217791	0.519357	0.12637	-2.48681	0.507794	-0.104948	1.07512	-2.9091	-0.299561	-2.5115	3.11062	3.45332	-0.354228	2.96394	0.162932	-4.14231	0.596805	-3.3294	-3.00443	-0.257246
Embryonic Stem Cell;dacomitinib;trt_cp;1.11 uM;24 h	0.0948377	0.437717	0.231235	0.332501	0.697894	0.0633127	0.17149	0.239109	0.490986	0.166603	0.196532	-3.3241	-3.41659	-3.08505	0.00668086	-2.83401	-0.0379409	0.141077	-2.48305	-0.586462	-0.160496	0.145296	-3.14802	-2.78478	-2.40787	-0.337927	0.215659	-0.0182865	-2.19657	0.454436	-2.15729	0.779705	-2.88291	-0.222959	-2.53554	0.597787	2.82063	-2.61308	2.61346	-0.309918	-4.08654	2.225	-2.83482	-2.6982	-0.264443
Kidney Cell;MLN-8054;trt_cp;1.11 uM;24 h	0.135744	-0.0589282	0.075926	0.163167	-0.477708	-0.097352	0.606949	0.670846	-0.435844	-0.0294015	-0.0717734	3.18728	0.376004	-0.0265711	0.370387	0.330021	-3.08035	-0.415595	-2.45182	-2.56418	-2.79217	-2.88677	-0.348935	-3.15826	2.45495	-0.0410926	0.110844	1.6089	0.299827	0.502421	0.40547	0.827783	3.26514	-3.72057	0.943237	0.477436	-0.419256	3.04318	-0.376659	3.33857	0.778693	-0.1715	-0.000860673	1.19169	3.73535
Neural Progenitor Cell;ibrutinib;trt_cp;1.11 uM;24 h	-0.381587	-0.217329	-0.363944	-2.42884	-2.24858	-0.343144	-0.215789	-2.21291	-0.512308	-0.343581	0.0533259	0.140112	-3.10669	-2.99648	-0.114306	-0.538124	-0.131688	-0.262941	-2.01231	-0.0391282	0.231717	2.46427	0.5225	0.235862	-0.0733664	-0.419356	0.225968	0.789022	-0.721996	2.63541	-2.47339	0.19756	0.353092	-1.90535	-2.34584	-0.298908	-0.488249	-2.65484	-2.6835	2.56641	-4.12535	0.29964	-2.53301	-3.09423	-2.54362
Neural Progenitor Cell;I-BET-762;trt_cp;1.11 uM;24 h	-2.61556	-0.385913	-2.25314	-0.783624	-3.02511	-1.03417	-0.181895	-0.568223	-2.74373	-0.762308	2.84759	2.9202	-0.218597	-0.276659	0.0604783	2.05793	-2.36454	2.934	2.25619	2.00949	-0.225038	0.363763	-2.97151	-1.89051	0.60048	0.24348	0.236892	0.21331	-0.428615	2.80322	-0.221767	-0.0555542	2.84908	-3.1746	0.0859152	-0.0210053	0.254285	-0.0488017	-2.97347	2.92499	-3.8094	2.33732	-0.011934	-3.01932	0.598992
Embryonic Stem Cell;OSI-930;trt_cp;1.11 uM;24 h	0.407376	0.645579	0.581917	0.319244	0.804621	0.374172	0.307248	0.235106	0.726063	0.481668	2.33488	-0.948935	-3.33367	-3.03528	2.48123	-0.694403	0.121099	-0.0424455	-2.11814	-0.523644	0.0460343	0.340596	-3.21219	-2.67629	-2.19845	0.0229811	0.175691	-0.089632	-2.40688	0.521325	-2.08598	0.687531	-2.64094	0.161939	-2.5782	0.371519	2.83374	-2.82936	0.715799	-0.0662523	-4.11168	2.16882	-2.67534	-2.99231	-0.108256
Neural Progenitor Cell;IOX2;trt_cp;1.11 uM;24 h	-2.12366	0.221345	-2.00067	-0.378607	-2.4807	-2.52479	-2.23895	-0.744927	-2.29558	-1.7996	2.95431	0.0395878	-0.151158	0.0829736	0.116495	-0.0458795	0.131062	0.19585	-0.276769	-0.0694081	0.533829	2.75186	-0.209139	0.498321	-0.028114	-0.355408	-0.587651	-0.274931	-0.519678	2.59506	-0.402823	0.256088	3.08038	-0.22541	-0.119461	-0.113374	-0.281068	-2.35038	-0.0513237	0.364306	-2.91135	0.324716	-0.0588379	-2.58404	2.66799
Neural Progenitor Cell;SGX-523;trt_cp;1.11 uM;24 h	-0.247397	2.50262	1.93098	2.58724	0.67315	-2.11043	-0.106825	-0.603599	0.378942	1.97832	0.296823	0.180539	2.36623	2.8293	2.67806	-0.367776	2.91312	0.317285	2.84321	2.87438	3.62067	3.76304	2.72965	3.27674	0.568606	-0.179492	-2.64181	0.147434	-0.794915	-0.076817	-0.657315	-0.0865841	2.92907	0.236155	2.22128	0.278957	-0.183477	-0.554681	-0.0827201	0.0122647	-2.86913	-2.23278	2.25217	-2.85982	-0.259597
Neural Progenitor Cell;UNC-1215;trt_cp;1.11 uM;24 h	0.273336	2.67547	2.19092	0.317589	0.247274	0.0106526	0.0668337	-0.387643	0.567026	2.44409	0.142996	-0.289515	2.45372	2.89072	2.37024	-0.203381	2.25742	0.440394	2.56056	0.0461907	3.69281	3.40035	3.21713	2.49269	0.0222339	-0.0408087	-2.27701	0.80918	-0.899367	-0.160623	-0.549356	0.237599	3.2136	0.444053	2.93124	0.726196	0.0506276	2.42996	0.0017476	2.94521	2.24924	1.97633	-1.88721	0.322853	2.57317
Embryonic Stem Cell;AZD-4547;trt_cp;1.11 uM;24 h	2.31109	0.789689	0.631407	2.5736	3.05163	0.447832	0.455662	0.247221	0.74005	0.504485	0.219124	-3.28996	-3.37937	-2.9635	2.62819	-2.82523	0.125158	0.198519	-2.11811	-0.480069	0.0974649	0.1204	-3.08951	-2.515	-0.0962642	-0.161283	0.0680968	-0.0214393	-2.29941	0.592842	-0.190773	0.513119	-2.68754	0.0289689	-2.46901	2.97533	2.83376	-2.77519	2.62051	-0.00519695	-4.05876	0.648376	-2.40232	-2.96526	-0.063987
Neural Progenitor Cell;KIN001-242;trt_cp;1.11 uM;24 h	-0.374883	2.27586	1.96582	2.27603	-0.000791687	-2.16829	-0.277989	-0.365105	-0.357795	2.04645	0.224246	-0.201433	-0.0660378	2.36923	0.138872	-0.235053	2.49815	0.572923	2.68386	2.38184	3.4251	3.36668	0.214235	2.47613	0.280023	-0.273821	-2.12276	0.390209	-0.539135	2.65587	-0.617127	0.222725	3.33195	0.232671	2.26337	0.525832	0.0462052	0.249189	0.334545	2.76715	-2.73967	2.11498	0.197481	0.0138914	2.35634
Neural Progenitor Cell;BRD-A92800748;trt_cp;1.11 uM;24 h	-2.28797	-0.0182656	-0.108753	-2.31649	-0.414299	-2.39567	-2.26633	-2.0093	-0.697149	-0.131893	2.64335	0.21435	-0.190074	-0.213348	0.0745491	0.0118112	0.112127	0.158417	2.22449	2.21695	0.891425	3.09203	0.233436	2.59081	0.459269	0.143932	-0.0471622	0.456213	-0.537502	2.47073	-0.161112	0.279122	3.18155	-0.181541	0.269921	-0.0770753	-0.169763	-2.58728	-0.396867	2.05227	-2.80634	0.441532	0.220339	-2.2036	2.63486
Neural Progenitor Cell;PF-04217903;trt_cp;1.11 uM;24 h	1.79977	0.595972	0.645332	0.00856088	0.346002	-0.0443259	0.425086	-1.89253	0.355288	0.258677	2.43514	0.292055	-0.143462	-2.45207	0.279602	1.83183	0.078483	-0.264153	2.04105	2.3228	0.815968	2.69447	0.489785	0.595435	-2.05788	-0.441463	-0.363637	0.808428	-0.573595	2.43866	-0.571848	-0.0527791	0.352879	0.00193816	-0.183146	-0.354601	-0.818778	-2.39136	-0.423825	2.33381	-3.9994	-0.530263	-2.71631	-2.97516	0.00919311
Neural Progenitor Cell;VE-821;trt_cp;1.11 uM;24 h	-3.0034	-0.4403	-0.450491	-2.71587	-2.75242	-2.66022	-2.70783	-0.652363	-2.63543	-2.60964	0.316462	-0.0851125	-0.546972	-0.584387	-0.408611	-0.0275666	-0.265232	0.042287	0.0923831	-2.55998	0.383621	0.287541	-0.407073	0.292365	-2.35575	-0.0645726	0.0200442	0.319094	-0.317778	2.89166	-0.510409	0.7205	3.21988	-2.78483	0.0279008	0.0338842	-0.1211	-0.249558	0.0734286	0.108572	-3.35144	0.963206	0.0295679	-2.27984	2.59632
Neural Progenitor Cell;JNK-IN-5A;trt_cp;1.11 uM;24 h	2.7266	2.46596	2.4788	2.60022	2.4666	2.42539	-0.0634688	2.33993	2.36032	2.67176	0.496741	0.163441	3.56923	3.29881	3.2449	0.582199	2.64794	-0.0614449	0.901304	3.1206	3.20203	2.68391	-0.394411	3.65366	2.52827	-0.00354829	-2.29262	-0.199897	-0.139371	-0.122314	-0.275044	-0.103507	3.22842	0.486139	0.816985	0.494861	0.339989	-3.24924	-0.527196	0.329316	3.35536	-2.70595	3.25276	0.385549	3.24823
Embryonic Stem Cell;tivozanib;trt_cp;1.11 uM;24 h	-0.178094	0.139848	0.0787303	0.0112466	0.30208	-0.169252	-0.0871556	0.210628	0.214727	-0.138415	0.283419	-3.26033	-3.53205	-3.06476	0.0230261	-0.732121	-0.256334	0.117	-2.67892	-2.94214	-3.00602	0.0159604	-3.36553	-3.06906	-2.69759	-0.046619	0.234539	-0.122569	-2.30096	0.5357	-0.0509072	0.815894	-2.8576	-0.209947	-2.10975	0.437182	0.652969	-2.82109	2.44087	-0.202897	-3.83835	2.52677	-2.83336	-2.704	-0.324959
Embryonic Stem Cell;ALW-II-49-7;trt_cp;1.11 uM;24 h	-0.179183	0.239171	-0.100786	0.148908	2.64744	-0.0539987	-0.136641	0.0785762	0.334901	0.0468397	2.55723	-3.31072	-3.50367	-3.08091	2.47816	-0.594815	0.0985778	0.163486	-0.200379	-0.613304	-2.70328	0.277204	-3.29091	-2.60416	0.14627	0.0599996	0.145037	-0.177329	-0.372209	0.594453	-2.12343	0.737673	-2.83329	-0.0783688	-2.37902	3.14072	3.21704	-2.75634	2.50792	-0.149922	-4.02322	0.947478	-2.39791	-3.02062	-0.265188
Neural Progenitor Cell;rolipram;trt_cp;1.11 uM;6 h	-2.45107	-0.205421	-2.16616	0.0235615	-1.13456	-0.331023	-0.0441477	2.27797	-2.46273	-2.35431	0.295626	3.57221	0.157303	0.0683528	0.463624	0.779486	-3.92246	-0.645703	-2.80828	-0.769284	-0.435131	-3.32984	-0.388934	-2.57871	-0.0805365	0.431987	0.217778	0.721011	0.700775	0.592867	0.133306	0.984153	3.64395	-3.50958	0.366097	-0.333679	0.0483837	-0.662585	-3.27268	0.0623632	0.15737	-0.362244	0.610685	0.09646	0.813999
Embryonic Stem Cell;PF-04217903;trt_cp;1.11 uM;24 h	0.16458	0.571294	0.305089	0.359806	0.625029	0.0227566	0.189865	2.30819	0.453498	0.208274	0.181851	-3.34892	-3.53995	-3.15339	-0.0233047	-2.77915	-0.0550136	0.0878819	-0.176403	-0.598686	-0.010062	0.472041	-3.18699	-2.65789	-2.54498	-0.0556797	0.410649	-0.218505	-2.4124	0.502337	-0.0043003	0.864184	-2.64093	0.0990532	-2.30876	2.97716	2.9125	-2.67313	2.62004	0.0509718	-4.18419	0.841795	-2.90003	-2.84697	-0.178097
Embryonic Stem Cell;BMS-509744;trt_cp;1.11 uM;24 h	-0.185957	0.271968	-0.0412482	0.075821	0.240418	-0.462282	-0.0931202	-0.0643577	0.250594	-0.177499	-0.212622	-3.5158	-3.72061	-3.3816	-0.604523	-2.78333	-0.524609	-2.8219	-0.875582	-1.06548	-3.23923	-0.380987	-3.59968	-3.0249	-2.63727	0.0193451	0.804764	-0.00534422	-0.242089	3.24153	-2.13554	1.10487	-2.64425	-0.697364	-0.00493621	0.573584	3.102	-2.68049	2.43451	-2.35418	-3.6037	1.1659	-2.94413	-2.50222	2.6295
Embryonic Stem Cell;amuvatinib;trt_cp;1.11 uM;24 h	0.00410439	0.35612	0.211086	2.38057	2.61363	-0.0112039	0.144572	0.230803	0.290261	0.131785	0.235461	-3.21536	-3.45508	-2.91123	0.114939	-0.544441	-0.0195717	0.152476	-0.107695	-0.54093	-0.0456496	0.388996	-3.01786	-2.39135	0.109917	-0.0269987	0.305436	2.45627	-0.291094	0.718509	-2.30402	0.694214	-2.67122	-0.219061	-2.21633	3.00124	2.97122	-2.6538	2.34559	0.00276523	-3.85023	0.675455	-2.58985	-2.7382	-0.101598
Neural Progenitor Cell;AZ-20;trt_cp;1.11 uM;24 h	0.246097	2.12446	0.367918	0.130338	0.121877	-0.175433	2.16421	-1.76715	0.281199	0.181788	2.91793	0.253878	-0.169987	-0.0172997	0.207439	0.331213	0.146609	0.0118319	0.206675	-0.206286	0.762601	0.496962	-0.0950026	0.517527	-0.269185	0.404401	0.13288	0.867975	-0.21223	0.892648	-0.321829	0.592085	1.39213	-0.0606686	0.865675	0.137453	0.246964	-0.0656022	-0.430514	0.209179	-0.170647	0.574428	0.30781	-0.123661	0.777694
Epithelial Cell;quinapril;trt_cp;1.11 uM;24 h	-0.355176	0.123743	0.0534172	2.87602	0.589453	2.74701	2.80107	-2.7034	-0.0887278	2.20046	-0.1838	3.3349	-0.142645	0.0130032	-0.236135	-3.07155	0.638769	2.87854	3.22743	0.836356	0.708117	0.591668	3.20202	2.56998	2.86846	-3.19087	-1.4109	-0.113201	-0.423176	-0.701118	-0.286781	-0.591982	2.71355	0.888224	3.32839	-0.21303	-0.00182318	3.62716	0.0222063	-2.6939	3.09618	-3.06771	-0.0427722	2.78793	-3.04881
Neural Progenitor Cell;NVP-TAE226;trt_cp;1.11 uM;24 h	3.24919	3.02402	2.93373	2.83275	3.24588	2.7707	3.27376	0.0139045	3.22868	3.01541	2.85703	3.69918	2.8135	2.89101	2.94599	2.53819	2.73106	-0.052076	0.204705	2.96519	1.05216	2.43992	0.870532	2.89253	0.536578	0.0551026	-0.527371	0.828439	-0.312246	0.802439	-0.214572	-0.425551	0.672305	0.368063	0.547939	-0.265975	-0.180155	0.408073	-0.865645	0.51748	-0.534223	-3.24403	-0.0547963	-0.685569	0.371949
Neural Progenitor Cell;HG-9-91-01;trt_cp;1.11 uM;24 h	1.76019	2.38875	1.97216	1.87364	1.96624	-0.135807	2.2691	-0.550835	0.0391484	-0.0146999	-0.112126	0.0673328	-3.08017	-2.79894	-2.81458	-0.297129	2.35751	0.0605681	-1.93367	0.118764	1.01712	2.76073	0.858144	0.519661	-2.02727	-0.385508	-0.114724	0.994995	-0.493729	2.85915	-2.48231	-0.0988525	0.143966	1.98559	-2.37968	-0.396324	-0.674752	0.0207603	-2.17025	2.72718	-3.91017	-2.35914	-2.9557	-3.15788	-2.66984
Neural Progenitor Cell;VX-745;trt_cp;1.11 uM;24 h	-0.306287	2.63285	2.0481	2.58129	0.469379	-2.33135	0.113917	-0.499847	0.298355	2.15615	0.437299	0.107899	0.243401	2.54231	2.62746	-0.273807	2.52109	0.302559	2.81849	2.74662	3.49951	3.74313	0.411867	2.92803	0.203628	-0.117606	-2.49812	0.10351	-0.846494	0.04195	-0.306236	0.0145427	2.93545	0.295954	2.23075	0.199359	-0.103053	-0.241058	-0.0491069	0.122379	-2.89077	-2.27547	-1.99397	-2.3329	-0.117959
Neural Progenitor Cell;BRD-K09991945;trt_cp;1.11 uM;24 h	2.31006	2.28244	2.1719	2.01575	1.80834	0.375465	1.93309	-0.56135	0.494206	0.664555	-0.0781618	0.602522	0.138267	0.0900553	0.210691	-1.72346	0.310412	-0.12569	0.153081	2.31121	1.11676	2.83197	0.421733	2.67599	-0.381185	-0.573987	-0.366984	0.664524	-0.457192	2.72329	-0.615855	-0.138061	1.00975	0.225295	-2.33309	-0.574606	-0.770102	-2.34357	-2.1197	0.161198	-3.79391	-2.66832	-2.60604	-2.78637	0.209013
Neural Progenitor Cell;OSI-930;trt_cp;1.11 uM;24 h	1.93829	2.21418	0.608911	0.18725	0.590853	-0.12014	0.494247	-2.04242	0.538242	0.345644	0.422739	0.141655	-0.264622	-0.529251	-0.158971	0.326526	0.131174	-0.289459	0.207689	0.627661	0.805736	2.75512	0.573967	0.714123	-1.89164	-0.172906	-0.0474608	0.715547	-0.371549	2.91176	-0.19043	0.268418	0.560856	-0.172855	-0.352664	-0.550882	-0.404847	-0.20219	-0.611385	2.45399	-3.66429	-0.0453029	-2.54826	-2.79675	0.0473862
Neural Progenitor Cell;SGI-1776;trt_cp;1.11 uM;24 h	2.18068	2.24759	0.342883	-0.205188	0.355906	-0.0936395	0.380918	-0.419759	0.364755	0.40181	2.73305	-0.0307665	-0.4013	-0.425965	-0.0741852	0.224071	0.250311	-0.29273	0.132026	0.0479831	0.666706	0.673376	0.511624	0.587358	-0.155392	-0.230927	-0.46077	0.931075	-0.562797	2.80283	-0.696417	0.213933	0.352992	-0.233534	-0.205267	-0.548604	-0.480124	-0.15875	-0.517447	2.17708	-3.44827	-0.122226	-2.47265	-2.76541	0.431642
Neural Progenitor Cell;ponatinib;trt_cp;1.11 uM;24 h	0.206955	2.53216	0.246919	2.22324	2.26429	0.00634509	2.29967	-0.633556	2.24216	2.22308	0.0975327	-0.0479332	-3.20953	-0.583454	-0.17047	-1.93803	-0.321823	0.219392	0.0429877	0.00741501	0.781967	2.66658	0.988394	0.00545902	-0.189496	-0.42185	-0.328703	1.29409	-0.620264	2.69569	-0.63935	0.00732391	0.53242	-0.200262	2.37096	0.000421202	-0.333392	2.47289	0.211275	2.94523	-2.63259	0.7584	-3.24004	-2.52446	0.765081
Neural Progenitor Cell;SB-525334;trt_cp;1.11 uM;24 h	-2.75027	-0.161267	-0.505768	-2.91981	-0.457397	-0.588306	-2.83291	-2.07316	-0.629225	-0.188644	-2.57813	-0.318538	-0.480992	-2.65572	-0.360387	-2.2016	-0.109627	0.0811059	2.23406	-0.122961	0.347749	3.05286	-0.131219	0.442474	0.0347469	-0.356143	0.0958189	0.374142	-0.775119	2.83417	-0.729076	0.821859	0.841181	-0.516908	-0.0794853	0.0963754	0.0746318	-2.48324	-0.457142	2.24314	-3.62452	0.693276	-2.2958	-2.65502	2.13537
Embryonic Stem Cell;AT-7867;trt_cp;1.11 uM;24 h	-0.0342517	0.219511	0.0550701	0.243273	0.511083	-0.0648189	0.00362584	2.27949	0.416296	0.108719	-0.234908	-1.02659	-3.6958	-3.45036	-0.32664	-3.01349	-0.227291	-2.51514	-2.88926	-3.15037	-0.343451	-0.230009	-3.3855	-1.12219	-2.91014	-0.0455888	0.536985	0.15764	-2.22	0.673741	-2.11687	1.21819	-2.83989	0.0951476	-2.3647	2.9453	2.88826	-3.03166	2.73725	-2.46527	-3.85352	1.27725	-3.20097	-2.65392	0.272441
Neural Progenitor Cell;KIN001-127;trt_cp;1.11 uM;24 h	-2.02718	0.489205	0.371388	0.426606	-0.49315	-2.4173	-0.24908	-1.90848	-0.324904	-0.000164071	2.35706	0.219209	0.12567	0.275507	0.0886148	2.04643	0.0778614	0.0122553	-0.0552318	0.146587	1.15915	3.08511	0.304656	0.840183	-2.06172	0.0052934	-0.442915	0.577099	-0.508861	2.59119	-0.544245	0.364172	3.54184	-0.259562	2.23232	-0.210116	-0.683175	-2.24909	-0.025343	0.110544	-2.30052	0.0238523	-0.147837	0.252936	3.08873
Neural Progenitor Cell;BI-2536;trt_cp;1.11 uM;24 h	-0.490091	0.0654435	-0.349039	-0.260178	-0.105612	-0.467015	-0.188508	-1.08997	-0.117141	2.27007	0.455391	0.469702	0.129383	2.43275	2.44808	0.160242	2.29873	0.417871	2.43218	2.33113	3.40721	3.54414	3.3567	0.839654	0.416637	-0.105316	-2.66725	0.98047	-0.620136	2.23863	-0.39445	-0.585965	1.25807	-0.0462956	2.29148	-0.160625	-0.278245	2.45615	0.129476	2.43148	-2.78335	-0.201674	-2.41254	0.0684029	0.222526
Neural Progenitor Cell;KU-55933;trt_cp;1.11 uM;24 h	0.0887868	2.22089	2.25137	2.23792	0.654664	0.562984	-0.206071	-0.344562	0.234752	2.27017	0.635429	0.444984	-0.2115	2.83563	0.601102	-0.568249	2.89124	0.518909	0.183128	0.333947	3.5242	2.98192	2.88527	2.49121	-1.5271	-2.27861	-3.01995	0.468451	-0.773294	2.44068	-0.463505	-0.80634	2.90986	0.564776	2.28918	0.264161	-0.207544	-2.31399	-0.00218382	0.223017	-2.87294	0.0478443	-2.58915	-2.23222	-0.286703
Neural Progenitor Cell;veliparib;trt_cp;1.11 uM;24 h	-1.9576	0.246043	0.334764	-2.17309	-0.468474	-0.122891	-0.148124	-0.487084	-0.284223	0.181224	2.65295	0.0140321	0.0474345	0.202988	0.231233	0.225179	0.0915461	0.0939486	2.19931	2.3396	1.00841	3.32165	0.315423	2.65286	-1.80146	0.247795	-0.209725	0.481771	-0.442652	2.355	-0.226589	0.386613	3.0295	-0.222047	0.448633	-0.0736081	-0.197344	-2.56884	-0.59524	0.227231	-2.50521	0.372638	0.186618	0.0365594	2.37509
Neural Progenitor Cell;azacitidine;trt_cp;1.11 uM;24 h	-2.02598	2.16675	-1.87132	-0.284987	-0.32064	-2.24339	-0.246644	-0.483105	-2.16716	-1.73639	2.57302	-0.262364	-0.00920634	-0.0329453	0.275833	0.256821	2.36018	0.178841	2.60896	2.42557	3.36496	3.41356	0.439208	0.841441	0.273728	0.194342	-0.405063	0.643884	-0.499507	2.68429	-0.706145	0.517866	3.29663	-0.0394202	0.340419	0.380283	-0.275872	0.069851	0.0878161	2.66235	-2.69165	2.43701	0.275071	0.0221764	2.80096
Neural Progenitor Cell;pyrazolanthrone;trt_cp;1.11 uM;24 h	-0.101507	2.31956	2.01265	2.11415	-2.05088	-0.177188	-0.0125965	-0.15439	0.056007	2.38061	2.6531	0.363285	0.467877	2.88546	2.92529	0.402012	2.11092	0.304701	0.177805	2.67177	3.39586	3.36491	0.935663	2.76602	-0.00410225	-0.0771727	-2.28399	0.840733	-0.454495	0.50067	-0.375073	0.207055	3.05279	-0.0643397	2.48457	0.100868	-0.368815	-0.240595	-0.474	2.88373	-2.54125	0.286877	2.0371	-2.36314	2.34106
Embryonic Stem Cell;GSK-1059615;trt_cp;1.11 uM;24 h	-0.63539	-0.159868	-0.458715	-0.477262	-0.478432	-0.480868	-0.512008	-2.35732	-0.139678	-0.435383	-2.54945	-3.69439	-4.02135	-3.81218	-3.07244	-2.8705	-0.718731	-2.94683	-3.00371	-3.42098	-3.52847	-0.482494	-3.68283	-2.91007	-2.57356	0.17811	0.789532	-0.0794512	-2.2675	0.632067	0.127563	1.52696	-3.3806	-0.962197	0.524578	3.0224	3.56964	0.0204874	2.33663	0.0013178	-3.50833	3.11735	-2.83263	0.279908	0.0312585
Neural Progenitor Cell;GSK-J2;trt_cp;1.11 uM;24 h	-2.42891	0.0157028	-2.01907	-2.34383	-2.78201	-2.53176	-2.39513	-2.38461	-2.15356	-2.1191	0.5749	0.514904	-0.205483	-0.00797002	-0.100985	0.429506	-2.46712	-0.145439	-2.43326	-0.204232	0.478118	0.473845	0.0504207	0.336678	-2.35826	-0.13731	-0.0862038	0.803957	-0.11116	1.27454	-0.40709	0.305665	3.34435	-3.13589	0.114846	-0.729709	-0.748278	0.0217465	-0.152648	2.04369	-2.92569	0.0401625	0.0232688	0.229138	2.92821
Neural Progenitor Cell;daminozide;trt_cp;1.11 uM;24 h	-2.56064	-0.0172395	-0.127351	-2.30462	-2.63594	-2.53543	-2.41125	-0.584122	-2.45739	-0.430084	2.62355	0.258137	-0.196587	-0.337227	-0.0151175	0.301764	-0.6707	0.0179574	-2.17979	-0.605985	0.471339	0.568749	0.183985	0.0143274	-2.19213	-0.0669269	-0.0989288	0.726984	-0.224507	3.03727	-0.238077	0.475274	3.50174	-0.744935	0.131048	-0.574383	-0.632286	-2.29549	-0.357498	2.08279	-2.81939	0.591084	-0.393078	0.488119	2.70902
Neural Progenitor Cell;JW-55;trt_cp;1.11 uM;24 h	-0.494016	2.43807	0.552881	2.1519	0.364096	-2.24678	-0.357017	-0.698768	0.306162	-0.39686	2.52052	-0.589695	0.0238522	0.289147	0.193509	-0.0176915	2.32229	0.459614	2.57478	2.37768	3.09692	3.32218	0.524108	0.911941	0.183228	-0.169112	-0.189177	0.203207	-0.4444	2.82841	-0.482622	0.15558	3.12399	0.0215819	1.97726	0.389584	-0.399315	-0.158584	0.0803525	2.23227	-3.08797	-1.92942	-2.2599	-2.58768	2.27701
Epithelial Cell;phenylbutyrate;trt_cp;1.11 uM;24 h	-0.279074	0.464357	-0.0981828	0.729216	2.47343	0.510714	0.942747	-0.689413	-0.0393732	0.0810163	-0.210056	3.18608	-2.06762	-2.13672	-1.978	-3.08163	-0.0664353	0.416712	0.836604	2.57744	0.126007	2.35484	2.82309	0.511321	-0.182894	-2.81272	-2.94452	-0.0814551	0.420639	-0.685006	-0.0571021	-0.266648	0.134163	2.96383	2.61016	2.86664	-2.53383	3.69034	-0.0552961	-2.69324	0.703812	-2.60403	-2.43408	2.7046	-3.46183
Embryonic Stem Cell;HG-14-10-04;trt_cp;1.11 uM;24 h	-0.0338876	0.278329	0.00965091	0.0472708	0.518415	-0.157568	-0.129304	-0.0352304	0.354562	-0.0348565	-0.024521	-3.70544	-3.68677	-3.44248	-0.44966	-2.75544	-0.176645	0.329752	-0.45777	-3.2103	-0.129168	0.413313	-3.34585	-1.05952	-2.88749	-0.0945431	0.50566	2.61527	-2.49497	0.556969	-0.0820465	0.955015	-3.0173	-0.429343	-2.2063	3.17858	3.30742	-0.210736	2.909	0.0848112	-3.98246	2.71914	-2.98993	-2.73335	-0.0310261
Neural Progenitor Cell;PF-573228;trt_cp;1.11 uM;24 h	-0.6408	-0.180609	-0.616605	-0.310224	-2.26713	-0.596395	-0.55148	-0.838626	-1.92852	-0.0934125	2.82965	0.331589	0.239938	2.7957	2.94781	0.178644	2.21522	0.460988	-0.0111452	0.182893	3.01006	3.18467	0.347441	2.64193	0.502142	-0.253264	-2.39426	0.094941	-0.514746	2.24404	-0.397011	-0.114	2.76177	-0.076215	2.45829	0.0249953	0.017461	-0.26618	-0.279098	0.104922	-2.74425	-2.05891	0.00688711	-2.48339	-0.195599
Neural Progenitor Cell;XMD-1499;trt_cp;1.11 uM;24 h	2.00166	2.3728	2.40814	2.31863	0.332265	0.290874	-0.153795	-0.49147	0.261983	2.65025	2.71467	0.691551	2.66514	3.0304	3.32399	2.13811	2.15498	-0.0755198	0.164072	0.615871	3.50846	2.78446	0.723836	3.08548	-0.553741	-0.152013	-2.60112	0.533384	-0.64021	0.430844	-0.234939	-0.257691	3.1983	0.385007	2.59059	0.193143	-0.478842	-2.39167	-0.571671	2.49192	0.216452	-0.0278741	-2.06466	0.0821881	2.76297
Embryonic Stem Cell;SAR-245409;trt_cp;1.11 uM;24 h	0.0639585	0.43982	0.1786	0.247249	0.62118	0.0108885	0.134631	0.320132	0.375101	0.126771	0.162213	-3.41831	-3.49584	-3.02854	0.0656545	-2.71407	0.0842042	-2.4232	-0.25971	-0.656957	0.00251433	0.319124	-3.13093	-2.57668	-2.29618	-0.0979521	0.315759	2.48632	-2.40823	0.704454	-2.32701	0.824683	-2.55704	-0.063087	-2.30829	2.88098	2.92598	-2.63921	2.3927	-0.10853	-4.00911	2.1791	-2.81778	-2.78613	-0.254453
Embryonic Stem Cell;KIN001-266;trt_cp;1.11 uM;24 h	-0.207169	0.286984	-0.109491	-0.0569176	0.275337	-0.302467	-0.120205	0.0368071	0.21404	-0.15664	0.0280696	-3.42458	-3.80499	-3.39452	-0.258518	-2.83849	-0.311728	-2.66492	-0.377723	-0.522176	-0.372996	0.218135	-3.29057	-2.86168	-2.50636	-0.125956	0.351976	-0.100654	-0.313704	0.343494	-2.30626	0.773496	-2.83818	-0.461605	-2.30571	3.00023	2.8313	-2.53436	2.48098	-0.0735621	-3.9971	0.803113	-2.67815	-2.67878	-0.201928
Epithelial Cell;prostaglandin-a1;trt_cp;1.11 uM;6 h	1.2675	0.525706	2.52765	0.0185371	0.822028	1.2279	-0.0975962	0.486505	2.52405	0.335978	-0.488038	-0.45774	-0.605127	-0.248536	0.110305	-2.93985	2.5715	0.672682	2.75534	2.54522	3.22214	0.997292	-0.179317	2.33433	2.15697	-0.221661	-0.334107	0.42612	-0.047736	-0.660912	0.410865	-1.5821	-3.33731	3.04492	-2.11823	0.478961	0.612674	2.54423	2.14129	-2.3493	-0.181103	-0.764341	-2.72085	-2.38111	-3.40319
Neural Progenitor Cell;GNF-2;trt_cp;1.11 uM;24 h	-0.159286	0.313785	2.04624	0.111781	-2.19939	-0.292682	-0.0258437	-0.384764	-0.501503	2.03469	2.91122	0.458386	0.371256	3.01722	2.79771	0.233112	0.460377	0.196892	0.290474	2.53897	3.10631	3.18217	0.367969	2.65947	0.288577	0.262298	-2.40544	0.142939	-0.409209	0.638232	-0.267756	0.165952	2.8603	-0.144754	2.48312	0.0630407	-0.232523	-2.38792	-0.539144	2.33742	-2.59102	-2.03345	2.00523	-2.52121	2.4048
Neural Progenitor Cell;GDC-0879;trt_cp;1.11 uM;24 h	-0.858075	-0.109069	-0.345219	-0.18126	-2.20344	-1.93056	-0.405139	-0.625092	-2.29246	0.41986	2.85053	0.750101	2.61036	2.7487	2.90121	2.1008	1.99091	0.389763	-0.054742	0.26929	3.24263	3.10225	0.113347	2.81566	0.446071	-0.193897	-2.50218	0.118145	-0.471508	2.38283	-0.399789	0.0951907	3.20777	-0.16373	0.0765969	-0.475104	-0.46078	-2.28788	-0.549722	0.0310712	-2.78431	-2.16288	-0.055943	-2.2815	2.6611
Embryonic Stem Cell;bosutinib;trt_cp;1.11 uM;24 h	0.0568867	0.428168	0.125444	0.232196	0.556429	0.00364022	0.00782616	2.25588	0.505532	0.171658	0.0255298	-3.39248	-3.68461	-3.34464	-0.1048	-2.7947	-0.0426676	-2.53948	-0.544207	-0.826376	-0.199838	0.152167	-3.16639	-2.93743	-2.534	-0.052762	0.433026	-0.0872093	-0.40944	0.494895	-2.08508	0.660352	-2.83837	-0.0920786	-2.54705	2.9846	2.994	-2.60527	2.61263	-0.324053	-4.10527	2.57929	-2.96736	-2.72121	-0.144278
Embryonic Stem Cell;HG-9-91-01;trt_cp;1.11 uM;24 h	-0.212993	0.304245	-0.103648	0.14546	0.508052	-0.121665	-0.229962	0.101726	0.324845	0.00446156	0.149274	-3.57414	-3.67798	-3.33585	-0.281187	-2.90797	0.0543851	-2.46197	-0.593327	-0.643828	-0.347887	0.0851891	-3.28771	-2.78384	-2.6029	-0.318528	0.305904	-0.0846692	-2.3652	0.627647	-2.36866	0.63759	-2.8903	-0.128044	-2.65421	2.99472	2.99992	-0.481655	2.69815	-0.114825	-4.18996	2.34848	-3.07061	-2.78985	-0.0598776
Embryonic Stem Cell;KIN001-270;trt_cp;1.11 uM;24 h	0.105107	0.492614	0.239586	0.446125	0.57663	0.0248763	0.231731	0.238013	0.479908	0.102562	0.13901	-3.32052	-3.61298	-3.21805	-0.0186916	-2.77551	-0.05217	-2.50481	-0.272706	-0.570755	-0.128627	0.218832	-3.13069	-2.66613	-2.41098	-0.176424	0.232415	-0.0946699	-2.32219	0.534461	-2.26615	0.639806	-2.56476	-0.194888	-2.50968	3.07997	2.93627	-2.80967	2.48276	-0.141302	-4.09901	2.3637	-2.73217	-2.87235	-0.0721692
Neural Progenitor Cell;GDC-0068;trt_cp;1.11 uM;24 h	2.44753	2.3727	2.25649	1.89897	2.05994	0.753715	2.239	-0.375829	2.23298	0.972267	2.53279	1.20372	0.0233483	0.073814	0.146464	0.424337	-0.107033	-0.143987	-0.00286014	2.37156	0.639982	2.32705	0.444833	2.27303	0.0126037	-0.134032	-0.39484	0.915718	-0.421679	0.993992	-0.327913	0.087553	0.542266	-0.0934296	0.452275	-0.70232	-0.378352	-0.350668	-3.05227	0.32689	-3.15903	-0.389864	-0.225958	-0.661523	0.79815
Embryonic Stem Cell;TPCA-1;trt_cp;1.11 uM;24 h	-0.123796	0.210756	0.0596728	0.229903	0.366388	-0.143397	-0.0568258	0.112864	0.359018	-0.0477598	0.120357	-0.924054	-3.4815	-3.07974	-0.0485037	-2.50093	0.131799	-2.48688	-0.382552	-0.420329	-0.0948196	0.164722	-3.24344	-2.55411	-2.46923	-0.223249	-0.0226736	-0.0628687	-0.28947	0.485653	-2.07733	0.614844	-2.97837	-0.328917	-2.47071	0.529072	2.78929	-2.54345	2.57566	-0.188894	-3.91899	0.793634	-2.74874	-2.59118	0.148858
Embryonic Stem Cell;everolimus;trt_cp;1.11 uM;24 h	-0.094874	0.284265	-0.0335225	-0.0366319	0.398314	-0.142563	-0.0898079	0.0280889	0.32545	-0.00748614	-0.0672458	-3.57335	-3.62242	-3.35068	-0.331149	-2.81721	-0.219951	-2.80278	-0.287876	-0.706696	-3.07445	-0.0437488	-3.32894	-2.91832	-2.63442	-0.0449668	0.482489	-0.076733	-0.341386	0.482552	0.0634772	1.01762	-2.92733	-0.389774	-2.22562	3.19357	3.22588	-2.70001	2.66841	-0.106413	-3.933	1.29028	-2.94784	-2.5523	-0.0375713
Neural Progenitor Cell;dabrafenib;trt_cp;1.11 uM;24 h	-0.594774	0.0667766	-0.118709	-0.211837	-0.352941	-2.06554	-0.477688	0.0784219	-2.18879	0.128495	2.4436	0.530518	0.0358073	0.0992272	2.4211	0.203172	2.57618	0.248552	0.00323488	2.74182	3.22421	2.82304	-2.65071	2.64695	0.0325981	0.25588	-2.36683	0.0635941	-0.567661	2.95643	-0.449586	0.0776756	3.2783	0.460499	-0.104375	0.0962103	-0.306132	-3.33541	-0.557905	0.390622	-2.8427	2.32121	2.34423	-2.63331	2.96992
Epithelial Cell;palovarotene;trt_cp;1.11 uM;24 h	-2.23797	0.203884	0.346008	0.813828	2.35762	0.427125	0.33358	0.650504	0.612627	0.165706	-2.61852	-0.426676	-2.8262	-2.44039	-2.94989	-2.07197	2.5241	-0.264863	2.19585	-0.255485	-0.260872	0.253521	0.0575657	2.31531	0.0970637	-0.862932	-0.260766	-0.520775	-2.81108	-0.381817	0.39229	-0.138994	-0.192704	0.461015	0.780087	-3.05951	-2.94826	-0.125031	0.401907	-2.99673	0.177383	0.325558	0.0664549	-0.455014	-2.86874
Endothelial Cell;UNC-1215;trt_cp;1.11 uM;24 h	-2.41202	-2.2405	-2.67125	-0.420396	-2.48661	-0.365794	-0.669936	0.644389	-2.50855	0.00640962	-3.29635	-0.449799	-0.54365	-2.97775	0.262424	-2.7766	-2.49262	-3.53372	-3.85666	-3.97317	-0.680563	-3.3389	-0.531945	-1.01043	-0.288882	0.0678833	2.08619	3.62655	-0.155133	2.53051	2.4165	0.474411	2.40924	-1.46127	3.29465	3.32552	0.959242	0.11833	0.639897	2.8772	2.68003	3.86383	0.826105	2.70768	4.16385
Embryonic Stem Cell;BRD-K09991945;trt_cp;1.11 uM;24 h	-0.0281176	0.535231	0.104435	0.332283	0.648112	-0.283238	0.27884	0.127314	0.500809	-0.0322414	-0.310873	-3.91902	-3.7041	-3.52465	-0.48061	-2.85337	-0.568373	-0.537081	-0.560226	-1.03715	-0.498262	-0.0971808	-3.4745	-2.71513	-2.3263	0.134239	1.02338	0.0874557	-2.45927	3.35724	-2.26482	1.19288	-2.6532	-0.440389	0.0217481	3.4513	3.49732	-0.271522	2.72433	0.0631802	-3.55923	0.792428	-2.44053	-0.321283	2.69992
Embryonic Stem Cell;pazopanib;trt_cp;1.11 uM;24 h	-0.00670381	0.430156	0.197736	0.21307	0.790245	0.0413957	0.0349115	0.0809864	0.446246	0.194413	0.276417	-3.47337	-3.53807	-3.08658	0.131946	-2.79252	0.0895236	0.0680083	-0.238792	-0.499571	0.0660198	0.349545	-3.03363	-2.8384	-0.106922	-0.0626054	0.336403	2.5682	-0.467951	0.604242	-0.0243744	0.716613	-2.86451	-0.157941	-2.54049	3.04174	2.99674	-2.75945	2.64655	-0.0570539	-4.23972	2.34871	-3.12161	-2.96057	-0.39225
Embryonic Stem Cell;KIN001-244;trt_cp;1.11 uM;24 h	0.00290764	0.247796	0.0711246	0.106424	0.288557	-0.124265	0.0172142	0.13144	0.240525	0.0828533	0.0549845	-3.2689	-3.60915	-3.19697	-0.0227017	-2.71552	0.0238074	-2.63253	-2.56941	-0.654479	-2.76152	0.0573558	-3.22974	-2.96889	-2.50141	-0.0758646	0.297002	-0.0203933	-2.39785	0.594021	-0.125835	0.889656	-2.61685	-0.288822	-2.34862	0.522634	3.02506	-2.87649	2.37276	-0.124283	-4.04427	1.05103	-2.72625	-2.8151	-0.129276
Embryonic Stem Cell;AST-1306;trt_cp;1.11 uM;24 h	0.177156	0.520358	0.374496	0.538398	0.689611	0.125843	0.25989	0.317302	0.461407	0.162481	0.137671	-3.38693	-3.52255	-3.05286	0.0690516	-2.75238	-0.0158682	0.0586575	-0.140755	-0.487246	-0.0678803	0.281529	-3.20596	-2.83329	-0.217277	-0.224887	0.349106	-0.0351318	-2.36382	0.535241	-0.00706414	0.93529	-2.86759	-0.296338	-2.43286	3.08039	2.85042	-2.65043	2.62058	0.0714646	-4.14036	2.24194	-2.82934	-2.77942	-0.326888
Embryonic Stem Cell;XMD-885;trt_cp;1.11 uM;24 h	0.0720111	0.203869	0.0901861	0.107205	0.38681	0.19399	-0.0207041	2.33489	0.407627	0.235386	-0.0768125	-2.95415	-3.48017	-3.0847	-0.0151733	-2.70752	-0.0573093	-2.60602	-2.76618	-0.741947	-2.90188	-0.357386	-3.28504	-2.77011	-2.68019	-0.0956177	0.136758	-0.0440567	-0.362317	0.663084	-2.1303	0.738315	-2.68371	-0.0462472	-2.45944	0.490973	2.92812	-2.4417	2.25611	-0.046116	-3.87732	1.03913	-2.7251	-2.51426	0.236441
Embryonic Stem Cell;BIX-02189;trt_cp;1.11 uM;24 h	0.156251	0.515575	0.289853	0.322517	0.676218	0.0791505	0.190447	2.22014	0.450689	0.206184	0.0617591	-1.12224	-3.61278	-3.1706	0.000475101	-2.70112	0.0379025	-2.37146	-0.163678	-0.627562	-0.0568377	0.22167	-3.14464	-2.73573	-2.31064	-0.0169878	0.328739	-0.205038	-2.4716	0.615956	-2.17759	0.801223	-2.60615	0.0490867	-2.27758	3.09004	3.06142	-2.77422	0.817806	0.00213875	-3.91634	2.34331	-2.54636	-2.87911	-0.145002
Neural Progenitor Cell;XMD-885;trt_cp;1.11 uM;24 h	2.64653	2.61408	1.08425	0.47564	1.01629	0.250563	0.731699	0.317493	0.737744	0.732768	2.17909	0.460837	0.11846	-2.26978	2.51828	-1.87905	0.435831	-0.00607108	2.38008	2.29298	1.15542	2.54693	0.601823	2.54968	0.0448185	-0.449952	-0.226507	1.04984	-0.81221	2.41914	-0.597903	-0.274107	1.01098	0.632846	-0.171497	-0.40111	-0.459767	-2.74086	-0.495046	2.38117	-3.76184	-0.276563	-2.2961	-2.93083	0.271421
Embryonic Stem Cell;AZD-9291;trt_cp;1.11 uM;24 h	0.141801	0.496684	0.255251	2.471	2.70447	-0.0358328	0.237667	0.40454	0.479125	0.12519	0.29399	-3.49404	-3.47235	-3.03524	2.46913	-0.67794	0.0179194	0.247955	0.273779	-0.314491	0.00743896	0.356063	-3.0506	-2.26081	0.0929059	0.0154168	0.315923	-0.0211196	-2.43555	0.634354	-0.107196	0.504783	-2.5933	-0.319272	-2.13106	3.26378	3.17018	-2.78006	0.747492	0.176019	-3.8792	0.688404	-0.70287	-3.08423	-0.276459
Neural Progenitor Cell;HG-14-10-04;trt_cp;1.11 uM;24 h	2.74271	2.55548	2.7803	2.09805	2.81042	2.27787	2.75244	-0.149934	2.85247	2.53673	2.11701	0.56698	-0.589845	-0.4062	0.246101	-0.261102	0.123212	-0.165863	-0.196529	2.40817	0.694717	0.197776	0.832284	-0.016661	0.0433962	0.0231115	-0.13223	1.18292	-0.236725	1.14465	-0.442207	0.270399	0.43453	0.0445187	0.481909	-0.1309	-0.458629	0.349569	-0.346403	0.885168	-3.43817	-0.435572	-3.19641	-2.77452	0.0340345
Embryonic Stem Cell;A-66;trt_cp;1.11 uM;24 h	0.049433	0.317758	0.268926	0.294552	0.775849	-0.00528423	0.0772875	0.239653	0.410851	0.161847	-0.122799	-3.30787	-3.54358	-3.2902	-0.139245	-2.75635	0.00921165	0.364418	-0.558348	-3.11795	-0.176955	-0.110128	-3.30013	-2.56456	-2.58747	-0.0888964	0.207649	0.123729	-2.43813	0.326378	0.0549336	0.83874	-2.33715	0.0751556	-2.41184	0.554205	0.665443	-2.4909	2.81731	-0.29389	-3.77209	2.84617	-3.08075	-2.47397	0.157554
Embryonic Stem Cell;rebastinib;trt_cp;1.11 uM;24 h	-0.136914	0.196219	0.101004	2.28611	2.62992	-0.105459	0.166271	-0.0503085	0.369496	0.0462099	0.0519057	-3.38415	-3.61561	-2.82618	-0.0257876	-3.04888	-0.162019	0.114352	-0.551318	-0.634383	-0.35881	0.154508	-3.52766	-2.72647	-0.127835	-2.07757	0.456005	-0.27804	-2.44037	0.711111	-0.122843	0.863276	-2.89994	-0.347221	-2.3896	0.528254	3.25088	-0.30556	2.8955	-0.089879	-4.09363	0.357719	-3.22856	-2.90489	-0.463361
Embryonic Stem Cell;PHA-767491;trt_cp;1.11 uM;24 h	0.0918392	0.585009	0.468008	0.263223	0.781781	0.132665	0.167207	0.356391	0.630409	0.242298	-0.0926726	-3.5804	-3.68642	-3.15316	-0.118932	-2.76818	-0.30114	0.159858	-0.378071	-3.06504	-2.84359	0.0888417	-3.38	-2.41053	-2.48855	-0.165231	2.14921	-0.320177	-2.5635	0.223825	-0.0122347	1.14771	-2.70199	0.257349	-1.93395	3.19146	3.15013	-2.50898	2.72137	-0.123378	-3.57537	2.52443	-2.56393	-2.56857	-0.0610964
Embryonic Stem Cell;KW-2449;trt_cp;1.11 uM;24 h	0.101956	0.493637	0.232975	0.345868	0.575462	-0.0669814	0.120751	0.210916	0.47351	0.144286	0.268361	-3.30429	-3.45402	-3.01873	0.15966	-2.63506	-0.0350615	0.019019	-0.125411	-0.532245	0.0880586	0.462647	-3.08349	-2.70458	-0.216353	0.0408456	0.469025	2.41236	-2.42514	0.633219	-0.150539	0.953175	-2.64609	-0.239565	-2.30726	2.98114	2.93156	-2.71505	2.53941	0.062144	-4.04943	0.778903	-2.93788	-2.84921	-0.23629
Embryonic Stem Cell;GDC-0068;trt_cp;1.11 uM;24 h	0.0242127	0.422777	0.306675	0.170571	0.625964	-0.0144003	0.0487182	0.0961348	0.436363	0.0939467	0.103353	-3.31333	-3.41929	-3.01208	-0.0402862	-0.690406	-0.0955609	-0.0155495	-0.0170329	-0.356972	0.127762	0.532119	-2.92399	-2.5225	-2.35015	0.0330316	0.374345	2.39303	-0.438558	0.660781	0.0974014	0.942879	-2.78982	-0.0192723	-2.21524	3.10914	2.95245	-2.6581	0.943507	-0.032461	-4.07253	0.816792	-2.81217	-2.83912	-0.345898
Embryonic Stem Cell;BRD-K68336408;trt_cp;1.11 uM;24 h	-0.192806	0.178278	-0.103368	0.0787391	0.330755	-0.34423	-0.126708	0.311211	0.198108	-0.22573	0.182084	-3.3193	-3.72827	-3.30557	-0.10734	-2.81774	-0.305532	-2.47321	-0.630795	-0.710401	-3.01356	0.0783356	-3.3595	-2.86582	-2.47535	-0.0946439	0.376534	-0.204987	-0.288056	0.5172	-2.24124	0.80656	-2.75477	-0.445004	-2.47244	2.90239	2.9317	-2.77414	2.58254	0.0178703	-4.0074	1.01928	-2.99729	-2.76798	-0.140913
Embryonic Stem Cell;SB-525334;trt_cp;1.11 uM;24 h	0.267827	0.599282	0.272186	2.51469	2.86984	-0.103232	0.192182	2.3751	0.455668	0.133571	0.156549	-3.50097	-3.55592	-3.04834	0.23189	-2.50608	0.178812	-0.188431	-0.0312701	-0.506562	-0.0413666	0.269728	-3.04745	-2.73796	0.210821	-0.0774995	0.347251	2.47473	-0.341142	3.24419	-0.20152	0.620839	-2.39989	-0.298775	0.0311884	3.20055	3.13685	-2.64347	2.83683	2.59016	-3.7397	0.785282	-2.28589	-2.75191	0.0616622
Embryonic Stem Cell;sunitinib;trt_cp;1.11 uM;24 h	-0.0417448	0.315174	0.0661322	0.0741673	0.569947	-0.152537	0.0170306	0.0705631	0.310304	0.0024901	2.44086	-3.33677	-3.55393	-3.19667	0.00838267	-0.608931	0.188391	0.0690156	-0.0473771	-0.360068	0.0285949	0.494178	-3.04128	-2.79544	-0.135665	0.046218	0.326471	2.40722	-2.34274	0.689881	-0.0867226	0.671718	-2.61657	-0.168886	-2.28238	3.09642	0.454627	-2.7524	2.52815	0.0227405	-3.93599	2.37206	-2.8268	-2.81462	-0.389248
Epithelial Cell;BRD-K88965984;trt_cp;10 uM;24 h	-0.11006	-0.405613	-0.391814	-0.0954829	-0.217654	0.269474	-0.0271508	-0.118214	0.0610746	-0.23327	2.96372	0.37809	3.22044	2.64316	3.16356	2.96958	-2.442	-3.27842	-3.06895	-0.415074	-3.10596	-3.32907	0.577113	-3.08922	0.313676	0.922664	-0.0313786	1.6657	0.774943	0.914075	0.187525	-2.71853	-2.54718	-3.74811	0.110513	-3.18826	-0.379901	3.04056	0.653604	3.35617	-0.104909	2.51974	0.144005	-0.114936	0.967724
Epithelial Cell;piroxicam;trt_cp;10 uM;6 h	2.96586	2.9019	3.04439	0.803319	2.69024	0.811616	0.876764	-0.0424055	2.69663	3.01474	-0.034058	-0.518683	0.206871	0.0876496	-0.481998	2.1106	2.67336	2.33748	2.3852	0.241468	3.01402	0.170176	3.00714	-1.90253	0.235824	2.01207	-0.219618	2.81871	-0.665442	0.333214	2.89618	-0.468766	0.142934	0.824866	0.264303	-0.517569	-2.97328	3.26038	2.4453	-2.26967	2.61328	0.0183588	-3.31986	2.85583	2.66595
Epithelial Cell;nemonapride;trt_cp;10 uM;6 h	3.96953	3.09847	3.54406	3.18143	3.23277	3.48537	3.28078	0.465352	3.57988	2.96949	0.350011	0.0922975	0.172783	-0.0911541	0.264653	-0.0991325	2.57636	0.353731	2.94234	3.35782	0.79764	0.591927	2.69883	0.240441	2.74055	0.0812607	-0.978792	3.30642	0.0640201	-0.125086	2.77957	-1.53797	-2.99756	2.71937	2.41312	0.433678	3.33413	2.8759	-3.01753	2.86993	2.94895	-2.60473	-2.14086	-0.126459	0.174548
Epithelial Cell;cyclosporin-a;trt_cp;10 uM;6 h	2.90768	2.42097	2.61089	2.70992	2.82429	2.54666	2.98038	-0.297429	3.02783	2.4794	-0.180781	-0.00469953	0.197544	-0.160732	0.105547	-0.0620893	3.04801	0.415342	2.9075	3.30141	3.66987	0.898948	3.39864	0.229804	2.80621	0.015123	-0.0292896	3.02241	0.231195	-0.128413	0.864665	-1.29527	-2.504	2.86425	-2.54702	0.043532	-2.88581	2.43674	-2.02133	2.53857	2.0211	-2.45483	0.0854223	-2.85741	-0.232816
Epithelial Cell;BRD-K53987746;trt_cp;10 uM;24 h	0.701879	0.202685	0.542297	0.208571	0.377425	0.774404	0.204923	0.557381	0.845123	2.88789	0.528486	0.326921	0.299697	0.262632	0.747181	0.173227	2.90478	0.26297	0.0422367	0.25602	-0.0412541	-0.0156312	0.399711	-0.240032	2.4625	1.58652	-2.63241	0.592133	-0.0939811	-2.16488	2.51125	-1.49415	-2.97318	-2.62827	-2.32072	0.304382	0.790689	2.69708	-0.126813	0.0807688	2.56454	-0.317479	-2.09758	-0.113468	-0.404769
Neural Progenitor Cell;AZD-7762;trt_cp;10 uM;24 h	-1.72088	2.48122	1.98072e-05	0.295777	1.871	-0.413564	2.20234	-0.119811	2.13945	2.14045	2.55711	0.949387	-0.0235993	-0.0877801	2.57005	2.19391	2.35667	0.148154	2.80595	2.75967	0.983909	3.05441	0.483377	2.68679	2.24703	0.349511	-0.111453	1.05873	-0.342684	2.91797	-0.272021	-0.570386	3.06689	0.168153	-0.257076	-0.02113	-0.398614	-3.23959	-0.404788	2.9383	-3.1841	0.504632	0.106715	-3.57129	0.634724
Neural Progenitor Cell;motesanib;trt_cp;10 uM;24 h	2.05498	0.317468	0.222209	-2.38327	2.4427	-0.0767021	0.0692319	-0.380275	2.33492	0.300485	2.84849	-0.446698	-2.86419	-2.92714	0.379253	2.12055	0.431183	0.121384	0.662339	0.535701	1.12543	3.26056	1.12261	2.13569	2.08004	-0.599056	-0.541892	1.828	-0.267966	3.01051	-2.48227	-0.0456433	0.144463	-0.157197	0.251791	-0.155725	-0.370272	0.0328116	0.845237	3.15552	-3.67234	-0.0554851	-2.85676	-2.89627	-0.0879
Embryonic Stem Cell;everolimus;trt_cp;10 uM;24 h	-0.0176875	0.37811	0.0589204	0.0756217	0.554093	-0.146011	-0.0162813	0.104435	0.403912	0.0762338	-0.1648	-3.71922	-3.61075	-3.42079	-0.360908	-2.78632	-0.0263675	-2.65011	-0.265234	-0.653369	-0.106782	0.373973	-3.22996	-2.8324	-2.76635	0.0279701	0.649467	2.44083	-2.34725	0.656518	-0.0368619	0.932045	-2.83066	-0.191974	-0.104356	3.20104	3.18084	-0.250605	0.909691	0.027238	-3.72751	2.69811	-2.78191	-2.54017	0.233741
Epithelial Cell;PSB-36;trt_cp;10 uM;24 h	0.599787	0.0875746	0.435465	0.123203	0.374213	0.157314	0.0512013	0.07367	0.446488	0.415773	0.105003	0.372428	0.469137	0.403109	0.367711	0.171295	3.31474	0.165608	-0.472064	0.394726	-0.145539	0.300529	-0.69632	0.377661	2.47293	0.296918	-2.53723	-0.418164	-0.38247	-2.03478	2.40613	-1.32789	-2.9282	-2.63535	-0.254687	-0.311872	0.126529	0.0986641	-0.376912	-0.216517	0.304348	-2.83839	0.0973906	-3.07688	2.5677
Neural Progenitor Cell;bisoprolol;trt_cp;10 uM;24 h	-0.461261	-0.339819	-0.851134	-0.534244	-0.294048	-0.179457	-0.703632	0.311135	0.195979	-0.292956	0.63715	1.02681	0.181403	-0.339605	0.512717	3.26099	0.125018	-2.75977	0.0665876	3.02957	-2.59483	-0.0590058	0.391211	-2.64491	0.813101	-0.0351247	-2.06266	2.91893	0.4102	0.992488	-0.272894	-0.593829	-0.14367	-3.46843	3.17417	2.31054	2.82351	0.709859	3.0873	3.19221	0.535756	-2.81308	2.97085	-0.0211202	0.99313
Epithelial Cell;cinanserin;trt_cp;10 uM;6 h	0.304508	-0.102332	0.619899	-2.79661	0.288287	-0.138369	-0.0757186	-2.88209	0.0151489	0.520508	-0.196606	-3.17419	-2.23683	-0.260996	-0.105545	-0.240484	0.753836	0.278296	-2.75829	-2.70088	3.46522	-2.50296	3.23252	-0.345892	-0.276726	1.79207	2.42885	0.967805	-0.622901	2.43428	3.47871	-0.281766	0.334826	3.28398	-0.509562	-0.0985032	-3.00807	3.57651	2.51258	-2.80861	-2.69084	-1.93904	-3.70957	0.841884	-0.462901
Neural Progenitor Cell;Y-27152;trt_cp;10 uM;24 h	-0.693256	-0.806662	-1.25158	-1.00282	-0.34822	-0.514849	-0.971008	-0.0241305	-0.232396	-0.64767	2.80399	0.472704	0.214797	-0.249966	0.829286	3.14851	0.288099	-0.343571	2.42907	3.13681	0.628259	0.596797	0.806381	-0.634381	1.01917	-0.417842	-0.310842	3.34958	0.487675	1.05691	-0.475448	-0.342781	-0.133657	-3.11171	1.03548	0.320372	0.860805	0.88527	3.18361	3.56883	0.0890107	-0.29015	3.07548	0.0266074	0.624591
Neural Progenitor Cell;tropisetron;trt_cp;10 uM;24 h	-0.332701	-0.0264015	-0.716829	-0.325555	0.251643	-0.244486	-0.387582	0.214654	0.467659	-0.149877	0.535411	0.631659	0.55454	0.082443	2.85874	0.780447	0.537234	-0.418094	2.57906	3.36934	0.64058	0.632039	0.838035	-0.107457	1.10677	-2.56302	-2.41758	3.39563	2.40232	0.68164	-0.417201	-0.757883	-0.16226	-3.04877	0.80767	0.105628	0.795261	0.922376	3.56915	3.68101	0.215133	-0.417133	3.09504	0.256816	0.91061
Neural Progenitor Cell;MDL-72832;trt_cp;10 uM;24 h	-0.334644	-0.148058	-0.882242	-0.302372	-0.228482	-0.35954	-0.548071	-0.0241052	0.206054	-0.487305	2.91462	0.139305	-0.192029	-2.78305	0.573145	2.80315	0.117171	-2.62993	-0.126957	2.77106	0.033471	0.109575	0.486781	-2.80155	0.474809	-0.220019	-2.089	3.22948	0.664274	0.97011	-0.0951243	-0.414725	-0.233425	-3.5713	2.87152	-0.201987	2.61492	0.585508	3.4279	3.11844	0.219472	-0.456242	2.45193	-0.013032	0.656449
Neural Progenitor Cell;GSK-J2;trt_cp;10 uM;24 h	-0.067609	0.397486	0.596083	0.0313194	0.105856	-2.0027	-0.260337	-0.702673	0.0387601	0.149608	2.45587	-0.0216281	-0.00302457	0.272816	0.289823	-0.0152163	0.186727	0.359513	2.41555	-0.033396	3.31697	2.85447	0.669285	0.757285	-1.92756	0.0611354	-0.181271	1.06476	-0.225108	2.68904	-0.542407	0.223168	3.0795	-0.130637	0.17779	-0.0221531	-0.217576	-0.0208515	0.161425	-2.11082	-2.80085	2.36283	-0.210738	0.11801	2.53559
Embryonic Stem Cell;BRD-K68336408;trt_cp;10 uM;24 h	-0.0937275	0.301604	-0.0752668	0.162269	0.40638	-0.195721	-0.0214939	0.148588	0.25399	-0.112324	0.200482	-3.32799	-3.6503	-3.37059	-0.0610711	-2.65261	-0.331377	-0.0707371	-0.408437	-0.623634	-3.05215	0.121001	-3.36674	-2.99816	-0.145054	-0.0690817	0.394485	-0.0690889	-0.255639	0.429027	0.0431857	0.824091	-2.84051	-0.491593	-2.40881	0.557869	3.01894	-2.74154	2.82588	-0.144247	-4.17998	0.974736	-2.61406	-2.84208	-0.351023
Embryonic Stem Cell;WZ-4002;trt_cp;1.11 uM;24 h	0.115463	0.497666	0.159905	0.43571	0.632259	-0.0798241	0.155146	2.32859	0.501033	0.19412	-0.134477	-3.59247	-3.59024	-3.33523	-0.0562952	-2.82123	-0.236844	-0.465172	-0.293846	-0.607232	-0.0636539	-0.120144	-3.17527	-2.60454	-2.50541	0.0139841	0.567902	2.52872	-2.35253	0.626091	-2.27061	0.9038	-2.69782	-0.270327	-0.0673273	3.31381	3.19658	-2.82491	2.55719	2.26539	-3.83836	1.17168	-2.37055	-2.6688	0.377971
Embryonic Stem Cell;BS-181;trt_cp;1.11 uM;24 h	-0.0311977	0.4227	0.0813361	0.275443	0.568718	-0.226435	0.0793904	0.166646	0.427307	0.0186781	-0.0242848	-3.68619	-3.72085	-3.45814	-0.341077	-2.91161	-0.190332	-0.387111	-0.418204	-0.83256	-0.250394	0.211941	-3.38539	-1.18	-2.62704	-0.0188664	0.628999	2.45818	-2.39355	0.580998	-2.25083	0.98076	-2.71017	-0.20594	-2.34808	3.213	3.22601	-2.57734	2.63005	-0.018275	-3.88671	1.00313	-2.82717	-2.44494	0.205917
Neural Progenitor Cell;CHIR-99021;trt_cp;2.22 uM;6 h	-2.66325	-2.57828	-2.44499	-0.100922	-3.26845	-2.04073	-2.65702	2.25492	-2.76359	-2.25248	0.396885	0.688115	-0.125825	-0.134636	0.339548	0.533676	-3.81758	-0.536105	-2.82099	-0.784686	-0.627905	-2.80818	-0.468918	-2.70849	-0.145488	0.462748	0.208447	0.154524	0.466573	0.535019	0.121769	1.2683	3.07565	-3.71136	0.411854	-0.396997	0.364163	-0.736378	-0.915022	0.0825381	0.00685603	-0.221652	2.69015	0.233484	0.565829
Epithelial Cell;BRD-K46170844;trt_cp;10 uM;6 h	0.853453	0.391599	0.790416	0.262286	0.171294	1.00079	-0.0840575	-0.319891	0.285387	0.597191	-0.0878672	2.55657	0.188653	0.311567	0.451821	-0.114409	2.57099	0.647962	2.53652	0.657887	0.910751	0.32971	-0.0787316	2.55545	0.32891	0.0326436	-0.469253	0.222918	-0.116658	-0.875184	0.422025	-1.39284	-2.83972	2.92277	-2.15045	0.306649	-0.651361	-2.2826	-2.38596	-2.35045	2.2957	-3.4026	-2.47306	-0.571075	-3.71268
Epithelial Cell;ARG-CSC-91;trt_cp;10 uM;24 h	2.77861	-0.00763064	0.402804	-0.121689	0.448449	2.49479	0.0183046	2.67467	0.71401	2.72592	2.29266	-0.138328	0.724069	0.0834153	2.73268	1.84408	2.2818	-2.69595	-0.559162	-3.03437	0.584139	-0.0339281	-2.48142	0.134422	2.39267	2.11983	-2.40883	3.23738	0.28348	-2.5453	-0.00385198	-2.98511	-2.12943	-2.2958	0.534665	0.0805751	2.83639	0.201891	0.235516	2.38721	2.61243	0.0202495	2.21589	-0.284684	2.9036
Epithelial Cell;naloxone;trt_cp;10 uM;24 h	3.05746	0.0203703	2.71885	-0.255861	2.40966	2.26919	-0.184052	0.0308364	2.67601	2.75498	0.288755	-0.214473	0.504897	0.561301	0.136735	0.18912	2.85064	-0.210263	-0.920023	-2.8361	-0.0231418	-0.210401	-0.639062	-0.481903	1.687	2.20114	-0.278386	0.410444	-2.09491	-1.72106	2.52351	-0.547584	-2.59777	-0.141185	0.0824941	0.0112722	0.442522	-2.16945	-2.14153	-0.193079	3.12163	2.42128	-2.36921	-0.0977637	3.3219
Epithelial Cell;BRD-K89190195;trt_cp;10 uM;24 h	2.94136	0.162651	2.693	-2.21625	2.28478	2.35453	-0.0138784	-0.101489	2.42321	2.83834	0.490724	-0.218587	0.40528	0.530505	-0.0781202	0.0577538	2.85532	0.375149	-0.380089	-0.22034	0.0568714	0.103775	-0.56417	-0.0928651	1.70582	1.55608	-0.45971	-0.198957	-0.23995	-2.41716	2.67283	-2.62785	-3.061	0.435733	-2.44778	-0.121035	0.853364	-2.26234	-0.0176499	-0.15652	2.71011	-0.0952816	-0.458041	-2.69409	0.245213
Neural Progenitor Cell;relcovaptan;trt_cp;10 uM;24 h	-0.498201	-0.278391	-0.775074	-0.612236	-0.0814411	-0.46492	-0.361998	0.19355	0.449587	-0.679992	0.410896	0.777891	0.321237	-0.139454	0.713803	2.99908	-2.11398	-0.756794	0.737722	1.00168	0.383103	1.95053	0.55241	-0.537157	0.862685	-0.674067	-0.0776558	3.38989	2.59887	3.27064	-0.194102	-0.30764	0.156466	-3.64679	0.909528	0.385749	0.691231	0.905359	3.09078	3.46958	0.0406725	-0.490515	3.23412	0.478953	0.568412
Adipose-derived Stem Cell;aminogenistein;trt_cp;10 uM;24 h	0.38023	2.23043	-0.259328	3.04088	-0.0538257	2.57353	2.30989	-0.578397	2.80527	-0.222233	-0.189918	0.66441	0.140882	-0.0726942	2.05322	-0.16877	-0.169208	-0.0243195	0.150273	0.371324	-3.11154	-2.72521	-0.0555871	-0.687592	0.811278	0.450258	0.0680179	2.94564	0.346057	-2.58789	-0.0719908	-2.80774	-2.97207	-3.2456	0.112328	3.60085	3.10592	3.36483	2.27029	0.664878	0.403251	-2.32515	3.33261	0.48798	-2.61632
Neural Progenitor Cell;TAK-715;trt_cp;10 uM;24 h	2.35627	2.55577	2.00377	0.184873	0.821468	-2.41473	2.43629	0.0804939	2.60035	2.22326	0.560444	0.110916	0.461147	0.12718	0.810092	2.98613	0.0384699	-0.221305	3.6985	3.4997	1.23159	3.47216	0.952037	3.28505	2.80821	0.339297	0.196938	1.30818	0.207777	3.00443	-0.276476	0.26043	1.01816	0.0178373	1.49181	0.780994	0.470977	-0.0447925	0.13385	1.44726	0.222543	0.666453	3.27567	0.24352	0.475726
Neural Progenitor Cell;NU-7026;trt_cp;10 uM;24 h	-0.770193	-0.357642	-0.915637	-2.82747	-0.864733	-0.451052	-0.258916	-0.867288	-0.246767	-0.400324	2.87331	3.10887	-0.15656	0.0853866	0.544649	2.27749	1.93061	-0.218472	2.06137	2.82983	0.870542	2.707	0.634883	0.358999	2.03098	-0.120037	-0.537565	1.10631	-0.137662	1.01959	-0.223947	-0.00395555	0.499845	-3.23284	2.85957	0.237528	0.28521	2.94722	-0.481146	3.15979	-0.294769	-0.00061617	0.254536	0.446629	0.446935
Neural Progenitor Cell;VE-821;trt_cp;10 uM;24 h	-2.10206	0.218485	0.00969734	-0.0556623	-0.0540081	-1.9906	-0.173022	-0.346624	0.15192	1.93922	0.648265	0.340296	0.146915	-0.030108	2.57106	0.201322	0.0578457	-0.237283	2.69322	2.44189	0.885527	0.435582	-0.268796	2.78853	-0.118451	0.0972773	-0.510312	0.411738	-0.60033	2.8714	-0.383588	-0.0319825	2.95352	0.330807	0.37554	0.707514	0.169288	-0.329746	0.14336	2.53464	-0.073624	0.792264	2.89617	0.146926	3.3349
Neural Progenitor Cell;GDC-0879;trt_cp;10 uM;24 h	-2.03717	-0.027762	-1.93739	-0.362245	-2.1186	-2.30789	-2.21514	-0.411006	-0.243197	-1.80757	0.436414	0.549598	-0.200963	-0.194781	-0.0134271	0.147258	-0.668309	-0.218422	0.13163	-0.249473	0.555487	0.113906	0.260324	-0.0758215	-1.96948	-0.0757281	0.000168295	1.14593	-0.150521	1.3726	-0.332405	0.284719	3.33802	-3.17648	0.343688	0.0454986	-0.273585	-0.215388	-0.00481217	0.717089	-0.509904	0.266724	-0.252086	0.344601	3.11837
Neural Progenitor Cell;KIN001-127;trt_cp;10 uM;24 h	2.49235	3.06169	0.109792	2.5998	3.24211	-0.077657	3.26329	2.31161	3.25572	0.407096	-0.27708	-0.0693408	0.085143	-0.495064	0.340323	-0.314705	-0.33024	-0.225765	0.174568	0.385607	1.05683	0.473777	0.721662	-0.0946831	0.114826	0.24268	0.268993	1.43548	-0.0468991	2.64179	-0.363033	0.216007	1.00225	0.101076	1.24918	0.795615	0.587271	0.78388	0.14567	0.550132	0.652081	0.451496	0.207259	0.645435	0.747013
Epithelial Cell;bromocriptine;trt_cp;10 uM;24 h	2.83877	-0.164352	0.586717	-0.242397	-0.254606	-0.276508	-0.0763506	-0.129128	0.433077	3.04073	0.285843	0.120201	0.703901	0.907459	0.30849	-0.145471	3.3072	0.107331	-0.603715	-0.603102	0.212942	-0.407572	-0.553075	-0.195759	1.92956	2.50634	-0.333886	0.160676	-2.21063	-0.0515993	2.31782	-2.34813	-2.93269	0.141539	-0.50993	-0.413617	0.114678	-3.26569	-2.42333	-0.148271	0.0326769	-0.28901	-0.132762	-3.31643	3.30742
Neural Progenitor Cell;MLN-0128;trt_cp;10 uM;24 h	2.48029	2.43835	2.10541	-0.217222	0.132952	2.16208	2.56092	-0.192108	2.19339	2.04497	0.0574503	2.82588	-0.427176	-0.345109	0.0343241	2.50971	1.90823	-0.732583	-0.00683312	2.64904	0.529983	2.18725	0.60411	0.135137	2.39149	0.0769088	0.0805285	1.2087	-0.391356	0.754699	-0.0589757	0.231536	0.33776	-2.3177	2.60957	-0.226051	-0.136677	0.533244	-3.19427	2.36283	-0.550207	-0.188284	-0.0435662	-0.306829	0.552612
Embryonic Stem Cell;NVP-BGJ398;trt_cp;10 uM;24 h	-2.42255	-0.689846	-2.45851	-2.43692	-1.94805	-2.20764	-0.593346	0.140209	-0.278568	-2.30421	-0.273814	-3.30736	-3.43729	-2.95241	-0.373003	-2.69315	-0.654024	-2.52815	-0.705244	-3.11763	-0.594687	0.199153	-3.51736	-0.948248	-0.313093	-1.51543	2.305	0.00237123	-0.450774	2.41519	-0.411778	0.932302	-2.87985	-0.719749	0.631506	0.502219	3.47149	0.251156	3.04104	2.75298	-0.351592	0.727775	-2.91352	0.0822401	2.51427
Embryonic Stem Cell;KIN001-266;trt_cp;10 uM;24 h	0.114074	0.443628	0.178578	0.286282	0.621776	-0.00515972	0.132701	0.0410649	0.507532	0.132128	0.155747	-3.48913	-3.53222	-3.18398	-0.013204	-0.594791	-0.0785953	0.127853	-0.0236039	-0.482942	0.0065552	0.508391	-3.14336	-2.60617	-2.37087	0.120094	0.449792	0.0182732	-0.27973	0.471189	0.0660563	0.830703	-2.87373	-0.222441	-2.35646	3.13602	2.98667	-2.67213	2.51274	0.00197164	-4.08902	2.45326	-2.61291	-2.81758	-0.33861
Embryonic Stem Cell;A-66;trt_cp;10 uM;24 h	-0.235511	-0.107454	-0.229109	-0.449294	-0.14674	-0.112297	-0.624136	-2.08744	0.0163708	-0.0433683	-2.85324	-3.19108	-3.84493	-3.58547	-2.92752	-3.06087	-0.439795	-2.61844	-3.02153	-3.38825	-3.23487	-0.258948	-3.55694	-0.816918	-1.96256	1.40794	0.763639	0.260722	-2.59972	0.667887	0.135656	1.56049	-2.75416	0.00273435	0.112722	3.15805	3.42008	-0.197591	0.910318	0.14591	-3.06818	3.08358	-3.13018	0.501409	0.37941
Epithelial Cell;BRD-K73155123;trt_cp;10 uM;6 h	-0.317139	-2.11178	-0.804453	-2.01381	-0.293442	2.17047	-0.026547	1.88306	-0.134366	-0.331974	-2.67697	0.0281676	-0.0700975	-2.79723	-0.4784	0.317248	-2.48916	-0.289719	-3.0454	-2.80142	2.68887	-2.79501	0.803473	-3.07071	2.37744	-0.194861	0.385374	3.30946	0.083622	-0.499022	2.83382	-0.434985	-0.0171789	-1.28502	0.805485	0.222775	0.390761	3.25016	-0.120982	3.17917	0.788027	2.59551	-0.108566	0.972908	0.736428
Epithelial Cell;SEW-00445;trt_cp;10 uM;6 h	0.746109	0.344126	0.603498	-0.0812445	2.55916	0.685102	0.557596	-0.115512	0.72818	0.828745	-0.306897	-2.41516	0.191883	-0.238099	-0.272936	0.542304	-0.318642	-0.469282	-0.21944	-2.94637	0.882101	-3.0528	1.15896	-0.670394	-0.636495	0.363616	1.09475	1.92663	0.229468	2.92614	2.82918	2.57079	0.751935	0.188975	0.713097	0.389197	0.320412	3.55726	0.0247529	2.98823	0.816764	4.1844	-0.54509	1.27701	1.05331
Epithelial Cell;DMBA;trt_cp;10 uM;24 h	-0.365493	-0.503894	-0.856387	-0.293863	-0.308583	-0.00316426	-0.293269	-0.175356	0.14328	-0.22959	2.91154	0.33087	2.87663	0.347403	0.871543	3.00367	-2.53919	-3.20835	-2.92749	-0.534941	-3.08085	-2.70989	0.846728	-3.06096	0.629045	0.879482	0.0210926	3.17785	1.14724	1.11581	0.378099	-2.32536	-2.7651	-3.75814	0.151653	-2.60812	-0.0897125	2.72885	0.370627	3.18285	-0.238564	2.88243	0.268234	-0.256873	0.71292
Epithelial Cell;ascorbic-acid;trt_cp;10 uM;24 h	-0.0615407	-0.326414	-0.461762	-0.711606	-0.123513	0.26487	-0.0841093	-0.0398769	-0.0450404	0.0477295	3.28111	0.102889	2.65387	2.3621	0.854144	3.19142	-2.70677	-3.20903	-2.97873	-3.06609	-3.13242	-0.640121	2.86546	-2.72921	0.0899062	0.822314	0.265819	3.28364	0.730224	1.13181	0.376483	0.337834	-2.75637	-3.79861	2.85968	-2.82213	0.0495104	2.90856	0.608709	3.46852	0.257907	3.0233	1.86126	0.112571	0.313082
Epithelial Cell;danazol;trt_cp;10 uM;6 h	0.584074	0.441498	0.447466	0.220959	0.64317	0.517904	0.454892	-2.46993	0.746724	0.314883	-0.317249	-1.0095	-0.813351	-0.990587	-0.210264	-2.22052	3.14647	-2.84207	0.260304	2.52317	3.41194	0.0983061	0.338243	-0.0262711	0.482646	0.0960462	0.227313	2.84462	-0.71751	-0.434972	0.940115	-1.03339	-0.321158	3.6347	-0.231768	-0.213076	-3.38452	-0.140497	-2.25191	-0.125961	2.28172	1.69782	-2.78003	-2.64258	0.37841
Epithelial Cell;colforsin;trt_cp;10 uM;6 h	-0.000780696	-0.111549	-0.0465672	0.328361	0.363963	0.791928	0.575261	-1.97806	0.671426	0.530445	0.052121	0.0241742	0.0840477	-0.00402529	2.39171	0.116375	2.71714	-0.176575	-2.65021	0.160382	0.519516	-0.465424	0.424134	-2.90355	0.590435	-0.510447	-2.57905	4.00949	0.12959	1.9709	2.51108	-0.756811	-2.68866	0.148856	-0.324928	-0.356396	0.134766	3.92076	0.758107	0.623168	0.394768	2.87	-2.84941	0.504615	0.481811
Epithelial Cell;pifithrin-mu;trt_cp;10 uM;6 h	0.00668313	-2.39251	-0.178192	-2.0119	2.2168	-1.98755	0.560555	-2.5442	1.74359	-2.33917	-2.87171	-0.456256	-0.0779942	-0.217171	-0.189503	-2.90181	-0.5101	0.120395	-0.359287	-0.410329	0.402534	-3.22186	-2.99585	-2.98536	-0.307071	2.52107	3.14718	0.582014	-0.207681	-0.111635	0.192406	-1.06195	0.31698	0.90756	-3.23273	3.216	2.92125	0.504682	-2.35228	0.250989	-0.736268	-2.03753	-0.268456	-0.200572	2.7432
Neural Progenitor Cell;fluoxetine;trt_cp;10 uM;6 h	0.26255	-0.378341	-0.200715	-3.20791	-0.627814	2.30042	-0.250415	0.0604702	-0.11816	2.7151	3.021	0.752674	0.159183	0.612738	0.422692	2.33045	-0.406943	0.209033	-2.79489	-2.94508	-0.203596	0.0785799	-3.39727	-2.4535	-1.8139	0.0786536	-2.60538	3.29441	-0.0967864	1.15258	0.14774	0.604044	0.113864	-2.69293	3.07002	3.34143	4.48496	0.773505	-0.534588	3.36106	0.868774	2.85014	2.62004	0.64104	3.4508
Neural Progenitor Cell;FR-122047;trt_cp;10 uM;24 h	-0.223903	-0.156772	-0.629271	-2.60804	0.196144	0.00878718	-0.378182	0.317757	0.796702	-0.0164108	2.49074	1.02118	0.627265	0.223303	3.07422	2.24725	0.344781	-0.325365	2.6623	3.0687	0.750896	0.520387	1.12723	0.304885	1.03505	-2.42088	-2.37427	3.51013	0.526448	0.668785	-0.250294	-0.715013	-0.136762	-2.63919	3.06271	0.285733	0.612166	0.776319	3.5083	3.5532	0.139913	0.0899001	3.06679	0.202479	0.919827
Neural Progenitor Cell;KIN001-270;trt_cp;10 uM;24 h	2.10958	0.583481	0.697349	0.211669	0.191314	0.104877	0.16292	-2.17152	0.386835	0.306628	0.321258	0.145612	0.0490563	-2.17589	-0.0529677	1.8189	0.286009	0.151143	2.28704	0.0970275	1.02624	2.84495	0.743775	2.75887	-2.00203	-0.54827	-0.153184	0.872739	-0.444044	3.15081	-0.648937	0.38637	2.82083	0.179559	-2.44833	-0.761485	-0.619218	-2.84689	-0.540719	2.01081	-3.86432	-0.0265582	-2.59198	-2.8601	-2.48987
Neural Progenitor Cell;CG-930;trt_cp;10 uM;24 h	-1.20555	-2.68853	-3.0411	-2.93816	-3.31052	-3.10335	-2.63587	-0.506479	-2.75064	-2.72502	2.70356	2.99755	-0.535256	-0.363314	-0.268656	0.0790843	-2.94055	0.0922332	-2.45055	-0.527705	0.0801427	-0.547434	0.0981496	-2.72257	-0.0354941	-0.430551	-0.130252	3.07392	-0.358541	1.15233	-0.665583	0.0394782	0.638199	-3.46507	0.461348	-0.196218	-0.0888272	0.0194375	0.201782	2.64822	-3.42712	-0.133139	-0.52983	-0.19546	2.82102
Neural Progenitor Cell;iniparib;trt_cp;10 uM;24 h	-0.024315	0.252595	0.299197	-2.34231	-0.26553	0.0107782	-2.01208	-0.705115	-0.292348	0.538248	2.60721	-0.113683	0.106512	0.294562	0.389366	-0.0822435	2.50774	0.171361	2.53445	2.45688	3.29654	3.25536	0.255337	2.66336	-0.582445	-0.0325463	-0.319845	0.405193	-0.610789	2.30525	-0.331676	0.23603	3.04832	0.267822	0.224795	0.308925	0.0212707	0.0456198	-0.297429	2.36016	-2.79502	2.24514	-2.11618	-2.17407	0.124197
Neural Progenitor Cell;KI-20227;trt_cp;3.33 uM;24 h	1.80228	2.28896	0.952542	0.638915	0.816096	-0.00282126	2.16521	-2.42717	0.615056	1.09318	2.18657	0.145944	0.352402	2.48957	2.54147	-0.195959	2.57679	0.632967	2.73423	2.45419	3.53134	2.98439	0.812175	0.72592	-1.68515	-0.233629	-0.457036	0.896157	-0.494649	2.59188	-0.598781	-0.0313476	2.99861	0.337924	0.126737	0.33958	-0.24012	0.517496	0.439919	2.04224	-2.77267	0.271884	-2.45125	0.308116	2.36419
Neural Progenitor Cell;KIN001-242;trt_cp;3.33 uM;24 h	-0.587668	2.07327	0.228039	-0.26475	-2.62707	-0.371325	-0.210497	-0.184432	-2.23768	-1.70635	2.75193	-0.00458465	0.355557	2.69928	2.86796	0.348578	2.06661	0.17142	2.54473	2.42892	3.02099	3.4622	0.342846	2.69875	0.180179	0.481494	-2.37587	0.0400992	-0.38008	0.494134	-0.321509	0.425792	2.77791	-0.357244	2.66991	0.106894	-0.360673	-2.60481	-0.345064	2.26285	-2.59447	0.157473	2.14102	-2.48479	2.58164
Neural Progenitor Cell;veliparib;trt_cp;3.33 uM;24 h	0.431942	0.599562	0.295352	0.375891	0.443348	0.0487112	0.291822	-1.97762	0.37849	0.926589	2.46286	0.20391	-0.0554861	0.200095	0.270481	-2.07078	0.244905	-0.0403751	2.58435	2.55734	1.15411	3.02877	0.533601	2.80835	-0.184585	-0.0704095	-2.17207	1.11139	-0.607353	2.41561	-0.57523	0.498472	2.88969	0.105302	2.91489	0.514518	-0.0181563	0.276382	-0.0270473	2.37737	0.0800317	0.591408	0.132348	0.431585	2.83138
Neural Progenitor Cell;PD-0325901;trt_cp;3.33 uM;24 h	0.199422	0.80219	2.36178	0.548861	0.274676	-0.0977897	2.22022	0.433781	1.80842	1.62378	0.367228	2.65998	-0.195756	-0.0454064	-0.198576	0.0704725	-0.344122	0.0763483	-0.231852	-0.258046	0.661916	-0.268638	-0.56341	2.44403	-0.138165	-0.676852	-0.321084	0.665094	-0.368617	2.45192	-0.713713	-0.300553	2.76639	-2.33768	-2.44445	-0.567559	-0.95834	-2.76298	-0.0348009	2.27907	-3.35957	-0.902331	-2.69105	-3.01437	2.91235
Neural Progenitor Cell;pyrazolanthrone;trt_cp;3.33 uM;24 h	-0.0411793	0.39399	0.0836608	0.0105768	0.201282	-0.26712	0.0970717	-0.92535	0.207853	0.559072	2.61117	-0.0371782	-0.176869	0.05065	0.351413	-2.24047	0.457878	-0.0518719	2.34786	2.55088	0.933247	3.02068	0.323368	2.63378	-1.7275	-0.189661	-0.263243	0.496745	-0.485438	2.48484	-0.255064	0.387403	1.07186	0.0270586	0.318193	0.238154	-0.155125	-0.175702	-0.234476	2.25178	-2.73933	0.322084	-2.03284	-2.70319	2.61848
Neural Progenitor Cell;GSK-J4;trt_cp;3.33 uM;24 h	-0.291642	0.520924	0.137823	0.390786	0.508041	-0.128848	2.04561	-0.75095	0.33197	2.24448	-0.148873	-0.127154	-0.033382	0.185284	0.453186	0.195488	0.266177	-0.136237	0.530341	2.50224	1.37019	3.02957	0.588364	0.844557	-1.72305	-0.163534	-2.144	0.810269	-0.651107	0.705924	-0.461843	0.346157	0.979165	0.0606046	2.6389	0.37968	-0.254617	0.219389	0.147462	2.42245	-0.175794	2.32821	0.52234	0.137218	2.94436
Neural Progenitor Cell;GSK-1059615;trt_cp;3.33 uM;24 h	-0.423682	2.28118	-1.78715	1.88871	-0.206841	-0.484019	2.44855	-2.22943	1.83138	0.275059	2.23986	2.98344	-0.413544	-0.149762	0.0923524	-0.0191721	-0.330586	-0.422223	-0.0804631	0.50266	0.536568	-0.0292485	0.865205	0.0302908	0.509797	-0.105565	-0.0369873	1.13767	-0.355359	2.97959	-0.564783	0.509113	0.818614	-2.88151	3.05201	0.165481	0.212829	0.488147	-1.08494	2.72275	-0.260936	0.462147	0.0287342	-0.0126885	0.742718
Neural Progenitor Cell;doramapimod;trt_cp;3.33 uM;24 h	1.81822	1.84169	0.747349	-0.394072	-1.80178	0.403681	0.378019	-1.90977	0.274212	0.235644	2.18427	0.569242	0.0808043	-0.0433219	0.0974813	-0.208425	2.32568	-0.0530905	0.0748506	2.81651	0.765717	2.64105	0.285145	2.63146	0.236686	-0.385206	-0.0614007	0.168604	-0.425363	2.54056	-0.478843	0.119	0.338523	-0.106267	-0.230608	-0.522617	-0.185077	-2.41341	-3.18104	2.42947	-3.96333	-2.68143	-0.0422119	-2.86642	0.175744
Neural Progenitor Cell;PF-04217903;trt_cp;3.33 uM;24 h	-0.500298	-0.0336241	-0.298934	-0.143886	-0.326927	-0.101057	0.0529584	-2.15009	-0.0791338	-0.0880872	-0.224851	0.475419	-0.562578	-0.836206	-0.0355362	-0.0782197	-0.830551	-0.757919	-0.28299	-0.334073	0.498364	0.179589	0.320026	-0.173589	-0.521911	-0.191339	0.0997186	1.01019	-0.498746	2.73335	-0.658577	0.524262	0.75448	-0.609504	0.244097	-0.191946	-0.512179	-0.218542	-0.323398	0.682968	-0.997795	0.194732	-0.311071	-0.11749	0.438767
Neural Progenitor Cell;GDC-0879;trt_cp;3.33 uM;24 h	-0.579616	0.209902	1.82446	0.180573	-2.23048	-2.07504	0.0826248	-0.519186	-1.98455	0.00820716	2.66546	0.57712	0.322124	0.368493	0.329786	0.493737	-0.294869	-0.117745	0.285994	-0.133214	0.875033	2.62132	0.60571	2.13583	-0.0160142	-0.178233	-0.16526	0.668817	-0.383232	2.64416	-0.616702	0.194534	3.9357	-0.380845	0.0724016	-0.389702	-0.442321	-2.49474	-0.730222	0.325387	-2.82066	0.126351	-0.0532758	-0.152278	2.55152
Neural Progenitor Cell;BRD-A92800748;trt_cp;3.33 uM;24 h	-1.80668	0.173195	0.230629	0.168759	-0.314349	-0.132884	1.93626	-0.398524	-0.17214	0.259772	2.64366	0.433934	0.0844542	0.0951983	2.80917	2.33126	0.00582166	-0.0905257	2.13881	2.14054	0.944503	2.88126	0.39063	2.68274	0.342874	-0.0382049	-0.533198	0.762445	-0.450355	0.709434	-0.198461	0.277441	2.89896	-0.226275	0.829421	0.267696	-0.0861756	-0.122319	-0.427067	2.17037	-0.343077	0.450981	0.466632	0.2142	2.86031
Neural Progenitor Cell;I-BET-762;trt_cp;3.33 uM;24 h	-2.95746	-0.278008	-2.56139	-2.92113	-3.12504	-3.04054	-2.2149	-2.30011	-2.6888	-2.69623	0.360314	0.650915	-0.526377	-0.80241	-0.420968	-0.113097	-2.89863	0.0473455	0.0306565	-0.304033	-0.571346	-0.269915	-0.495765	-2.73687	-1.92319	0.200869	0.842889	0.583844	-0.0215307	2.96247	-0.109179	0.366517	2.55994	-3.29838	-0.364787	-0.260549	0.0650973	0.033614	-2.90654	2.83418	-3.84874	0.824636	-0.107164	-2.73373	0.441048
Neural Progenitor Cell;ischemin;trt_cp;3.33 uM;24 h	-0.369518	2.28093	0.361813	0.138428	0.53718	-2.07177	0.0718988	-0.869039	0.111701	1.72018	2.51697	4.75058e-05	0.0412011	0.381109	0.346323	-0.176561	-0.0794437	0.17029	2.42673	0.22101	1.01892	3.03717	0.515775	0.493935	0.345935	-0.17378	-0.20416	0.746533	-0.370247	2.63414	-0.531398	0.465464	3.02162	-0.312889	2.69516	0.439631	-0.0763891	0.662581	0.0589773	2.62523	-0.32148	0.523614	-0.216732	0.5273	2.34771
Neural Progenitor Cell;BX-795;trt_cp;3.33 uM;24 h	0.0112753	2.7622	2.30259	2.52453	0.521278	-0.219261	0.346997	-0.1278	1.74982	2.0528	2.6544	0.219192	0.26308	2.51131	2.68918	2.09952	2.56625	0.0521742	0.510838	2.76538	3.60763	3.55432	0.123988	3.1834	0.317306	-0.37069	-2.85331	0.228845	-0.628796	2.76326	-0.248275	-0.0356049	3.24153	0.373424	2.11027	-0.229896	-0.539113	-2.64323	-0.118957	2.18448	-2.56069	-0.3046	2.16267	-2.61357	2.65077
Neural Progenitor Cell;D-4476;trt_cp;3.33 uM;24 h	-2.08369	0.407126	0.263093	2.33801	-0.0536414	-2.42898	-0.230506	-0.552987	-0.35826	0.13829	2.41745	0.0866547	0.0249164	0.025995	0.21833	-0.109309	2.35849	0.116727	2.43378	2.14814	1.07175	3.36973	0.38843	2.7685	0.339154	-0.0616614	-0.452545	0.388676	-0.444637	2.3386	-0.608695	0.487641	3.31771	-0.333378	2.56576	0.204567	-0.316557	-2.58306	0.115414	2.30458	-2.51234	0.477701	-0.0184647	0.192905	2.52331
Neural Progenitor Cell;CG-930;trt_cp;3.33 uM;24 h	-0.197331	0.23854	0.0410817	-0.127247	-0.46833	-0.464659	-2.1727	-2.28588	-0.291121	0.0739349	2.46981	0.189997	-0.15735	0.0308086	0.195388	-0.0239206	-0.0148561	-0.135723	0.243081	-0.0472334	1.09462	0.703105	0.494842	0.408195	-2.34265	0.134889	-0.0186589	0.710187	-0.439061	0.983151	-0.415922	0.253493	3.29314	0.116714	0.131994	-0.0961194	-0.622641	-0.153683	-0.317145	2.07904	-2.80665	0.42355	-2.51394	-0.0018708	2.60369
Neural Progenitor Cell;amuvatinib;trt_cp;3.33 uM;24 h	2.34796	2.67657	2.40971	0.45436	2.75145	0.0506738	2.58352	0.302925	2.52801	0.68879	0.122409	0.302975	0.0407858	-0.401429	0.140202	-0.0516585	0.331112	-0.195579	2.65381	2.60928	1.1853	2.90521	0.42559	2.90997	-0.0170631	0.0892882	-0.0373643	1.19523	-0.490094	3.29826	-0.714725	0.26893	1.42042	0.279835	0.119983	0.17627	-0.226777	-0.332727	-0.0589772	0.462305	-0.984407	-0.211125	0.116861	-0.321454	0.590791
Embryonic Stem Cell;XMD-885;trt_cp;3.33 uM;24 h	0.068091	0.236942	0.194469	-0.0840256	0.380842	-0.113472	-0.0202551	2.21059	0.441983	0.0846433	-0.542208	-3.57094	-3.59718	-3.43234	-0.366763	-3.04632	-0.672705	-0.635997	-0.24193	-0.92041	-0.462556	-0.400006	-3.36556	-1.13911	-2.47914	-1.91439	0.789783	3.02285	-2.60753	0.68556	-0.0919219	1.20776	-2.69261	-0.245991	0.104817	3.56415	3.7072	0.168985	2.65629	2.45655	-3.06777	2.8697	-2.39733	0.331062	3.10364
Embryonic Stem Cell;pazopanib;trt_cp;3.33 uM;24 h	-0.186654	0.188056	-0.0697886	0.0809987	0.450899	-0.0104684	-0.0961859	0.238479	0.235647	-0.0293353	0.276482	-3.10208	-3.46285	-2.90545	-0.00811061	-2.60381	-0.110369	-0.0380299	-2.80995	-0.622182	-2.84667	0.156822	-3.21009	-2.9752	-2.58778	0.0378466	0.280655	-0.0806107	-0.214709	0.412837	-2.06976	0.855699	-2.80104	-0.475644	-2.56556	0.406186	2.82104	-0.390239	2.59842	-0.268125	-4.124	0.708232	-3.41849	-2.67186	-0.17178
Embryonic Stem Cell;AST-1306;trt_cp;3.33 uM;24 h	0.18912	0.425744	0.230685	0.239437	0.646875	0.168815	0.178382	0.21889	0.445013	0.264563	0.12311	-3.31839	-3.47885	-2.98524	0.108939	-2.77786	0.251576	-2.4217	-0.0112371	-0.446106	0.143252	0.399614	-2.90509	-2.76046	-2.22668	-0.1422	0.346309	2.55864	-2.43208	0.588034	-0.0441354	0.888295	-2.55157	-0.118994	-2.48424	3.00821	2.99839	-2.6412	2.48372	-0.0333715	-3.92448	2.36847	-2.88504	-2.80004	-0.130684
Neural Progenitor Cell;MLN-0128;trt_cp;3.33 uM;24 h	2.16242	2.4034	1.88141	0.136542	0.120029	1.8556	2.31279	-0.219737	2.19759	2.21013	2.15467	2.13142	-0.47413	-0.526236	0.0605942	2.23091	0.156682	-0.420407	2.05743	2.74946	0.437418	2.57306	0.628268	2.08976	2.62748	0.0896617	-0.0654912	1.1053	-0.544757	0.895444	-0.164617	0.399366	0.204087	-2.56532	2.38135	-0.0132513	-0.0685741	0.505984	-2.81124	2.86092	-0.677874	-0.172759	0.00549543	-0.342873	0.878428
Neural Progenitor Cell;NVP-TAE226;trt_cp;3.33 uM;24 h	2.64045	2.58218	2.57617	0.38012	2.55478	2.5727	2.92613	-1.86335	2.95063	2.56371	2.7675	3.62864	-0.0176972	0.334882	2.63425	2.32072	2.06176	-0.466221	-0.252138	2.85151	0.568455	-0.192227	0.473293	0.153914	0.443201	0.0445355	-0.440756	0.798199	-0.299136	0.720058	0.0255977	-0.239384	0.434557	-0.266435	0.298454	-0.56889	-0.167363	0.298929	-3.31808	2.56937	-0.836434	-0.798331	-0.308176	-0.859899	0.347628
Neural Progenitor Cell;SB-203580;trt_cp;3.33 uM;24 h	-0.493507	2.4776	2.03892	-0.0140126	0.0428194	-2.19772	-0.29484	-0.388296	-0.0775643	0.492665	0.256487	-0.0771066	0.414328	2.56324	2.50608	-2.39891	2.20372	0.629923	2.44168	2.42207	3.25113	3.44063	0.204426	2.79056	-0.287413	0.585188	-2.14742	-0.159771	-0.718568	-0.122731	-0.5047	-0.0101931	3.3435	0.182527	1.91926	0.403549	-0.269041	-2.62928	-0.311654	0.212537	-3.107	-2.05627	-0.224419	-2.66091	-0.179475
Neural Progenitor Cell;serdemetan;trt_cp;3.33 uM;24 h	1.79588	2.32228	2.21407	0.639301	0.393196	-0.252422	2.1262	-0.43344	0.606754	0.688976	2.56918	0.0695689	2.59927	2.70546	0.216452	2.11963	0.407964	0.484344	2.95185	2.63664	3.66504	3.14625	0.697099	2.52418	-1.83913	-0.010057	-0.22195	0.481576	-0.359624	2.98232	-0.332612	-0.109389	3.5021	0.292701	-0.0468485	0.0819412	-0.0454887	-2.36671	-0.135387	0.329794	-2.90017	0.0977203	-0.237981	-2.06794	2.54087
Neural Progenitor Cell;olaparib;trt_cp;3.33 uM;24 h	-0.216621	0.124605	-0.24361	-0.0534652	-0.513239	-2.25426	0.0810442	1.60007	-0.0678277	-0.18921	0.532219	0.397354	-0.194261	-0.196812	0.332701	0.253133	-0.28021	-0.301842	0.346906	0.0173852	0.605629	0.427206	0.144867	0.580659	-0.316156	0.300718	0.272694	0.805719	-0.327861	0.992739	-0.23555	0.589368	1.30605	-0.577184	0.861275	0.191645	-0.104744	-0.0667083	-0.389222	0.521177	-0.0713653	0.700575	0.519509	0.228016	3.08538
Neural Progenitor Cell;KIN001-260;trt_cp;3.33 uM;24 h	-0.127878	2.50547	1.90016	2.23427	0.599653	-1.98522	0.0809704	-0.452786	0.478477	2.33613	0.170848	-0.206931	0.517458	2.67363	0.448524	-0.219411	2.24144	0.259138	2.46949	2.38106	3.40445	3.23022	0.953552	0.652704	-0.00585219	0.259096	-2.26856	0.523541	-0.680857	2.12099	-0.605612	0.163796	3.31803	0.267491	2.75459	0.452494	-0.339562	1.98117	-0.0515909	2.72731	-2.13648	0.0721799	-2.25041	0.204351	2.4234
Embryonic Stem Cell;everolimus;trt_cp;3.33 uM;24 h	0.202281	0.531992	0.292491	0.340364	0.787679	0.151798	0.244056	-0.0443935	0.504826	0.248307	0.0328642	-3.66794	-3.57232	-3.25176	-0.241276	-2.81668	-0.056598	0.15796	-0.272191	-0.678544	-0.134419	-0.0876343	-3.17291	-2.81307	-2.71357	-0.16448	0.422628	0.116987	-2.31236	0.556202	0.126587	0.898361	-2.99224	-0.253967	-2.29059	3.16842	3.25169	-2.405	2.68237	-0.300622	-4.04193	2.53333	-3.03623	-2.61485	-0.199139
Embryonic Stem Cell;motesanib;trt_cp;3.33 uM;24 h	-0.0847525	0.286491	-0.0475329	0.194717	0.408085	-0.278516	0.0217211	0.209518	0.366612	-0.0632932	0.0607774	-3.46985	-3.55061	-3.294	-0.239106	-2.90394	-0.22418	-2.60217	-2.73379	-0.807072	-3.14057	0.0985938	-3.4916	-2.87763	-2.6283	-0.11698	0.368953	-0.162243	-0.362283	0.407946	-0.248469	0.987929	-2.91487	-0.258897	-2.47262	3.09675	3.10811	-2.66238	2.59785	-0.099191	-3.94995	0.761998	-2.87009	-2.74246	0.0183969
HSC;iloprost;trt_cp;3.33 uM;6 h	0.187657	2.27113	2.33033	2.61515	3.39244	-0.13405	0.307167	2.68591	2.49414	-0.179407	2.54438	0.559045	-0.300781	-0.145954	2.41185	-2.46655	3.03916	-2.82539	-2.54688	-0.639802	-2.73395	-3.26317	-3.12807	2.99783	-2.46352	0.00098042	-2.81456	-3.11934	0.0494904	-0.527479	-2.54201	0.00426455	-1.88388	0.648934	2.48544	-0.026341	0.530795	-3.4768	-0.340616	-2.58048	0.174231	0.0148553	0.292973	-3.19714	0.114215
Neural Progenitor Cell;BIX-01294;trt_cp;3.33 uM;24 h	-0.240308	2.59093	-0.092019	0.169466	1.81946	-0.487196	-0.122745	-0.2456	-0.092557	0.0560186	2.72245	0.00185757	0.0618177	0.273284	2.46462	0.0514383	2.59602	0.368199	2.62549	2.56392	3.38479	3.24728	0.705006	2.79281	0.0759664	-0.242804	-2.34289	0.678184	-0.506933	2.79621	-0.588711	-0.174383	3.38772	0.29205	2.42427	0.13643	-0.316615	-2.28391	0.049254	2.54437	-2.73925	1.61141	0.165161	-2.61413	-0.170814
Neural Progenitor Cell;ABT-737;trt_cp;3.33 uM;24 h	0.141052	0.245074	0.165539	0.0565471	0.0607882	-0.233555	0.217641	-2.19163	-0.0988448	0.303511	0.247911	0.171765	-0.108326	-0.0335562	-0.171458	-0.0545552	-0.235272	-0.11207	0.204056	-0.163774	0.830152	0.152818	0.413217	0.140803	-1.83198	-0.46341	-0.184347	0.788559	-0.258173	2.57617	-0.524516	0.378021	3.08843	-0.283158	0.500513	0.104125	-0.250323	0.566174	0.345842	2.42549	-2.81078	0.300055	-2.93074	0.743425	2.85207
Neural Progenitor Cell;NPK76-II-72-1;trt_cp;3.33 uM;24 h	-2.22109	0.401696	-2.32884	0.185198	0.00346126	-2.88614	0.0774735	-0.90352	-0.0300576	-2.05944	0.10344	-0.106017	-1.07935	-0.865796	-0.518562	-0.0706056	-0.749481	-0.209864	0.16835	-0.357544	0.556749	0.131967	0.538555	-0.0350873	1.94407	-0.38714	0.100642	1.30536	-0.632487	0.929312	-0.919464	0.269752	0.971105	-2.7257	0.81813	0.210989	-0.322149	0.668679	0.537032	3.07289	-0.317057	0.535247	-0.49236	0.0644065	0.909877
Neural Progenitor Cell;GSK-461364;trt_cp;3.33 uM;24 h	0.0196708	0.173955	0.0890242	-0.152975	0.0509998	-0.409296	-2.13201	-0.105714	-0.0639993	0.0525238	0.527621	-0.167819	-0.13107	-0.218342	0.060799	0.084249	-0.0484321	-0.00751732	2.84861	2.4849	0.871889	3.18076	0.116921	2.90301	2.19443	0.267466	-0.0467669	0.840624	-0.691702	0.573211	-0.539139	0.384913	3.13603	0.128244	0.584329	0.494091	0.206666	-0.570026	-0.0460148	2.85715	0.0496206	1.05731	0.55793	-0.00161969	3.24635
Neural Progenitor Cell;KIN001-269;trt_cp;3.33 uM;24 h	-0.0910387	2.56547	2.15898	2.6298	0.695824	-2.11932	0.136584	-0.166247	1.62238	2.17855	0.104977	0.182012	2.39793	2.55202	0.241186	-2.10358	2.348	0.345754	0.136818	2.57722	3.53571	3.54818	0.666885	2.55769	0.0998032	-0.145088	-2.33926	0.476816	-0.305364	2.52711	-0.615599	-0.0829626	3.42534	0.358063	2.53363	0.225839	-0.29969	-2.22044	0.166456	2.53272	-2.75474	-2.19719	-1.94793	-2.33091	2.26907
Neural Progenitor Cell;vandetanib;trt_cp;3.33 uM;24 h	2.0656	2.25916	0.634703	0.0342545	2.18512	0.173494	0.776607	-2.35386	2.24453	0.583808	0.160885	0.838751	-0.314136	-0.447293	-0.0538843	0.205665	-0.111864	-0.147987	0.260955	0.306313	0.8745	0.46193	0.792494	0.48408	-0.241671	-0.199891	-0.192322	1.25291	-0.322521	1.20358	-0.690235	0.0420066	0.499081	-0.170845	-0.180505	-0.18967	-0.541257	0.330587	-0.511512	2.74264	-3.6176	-0.27677	-0.436527	-0.234594	0.264701
Neural Progenitor Cell;AZD-7762;trt_cp;3.33 uM;24 h	-2.54863	-2.32497	-2.41693	-2.46497	-2.86453	-2.54269	-2.59152	-0.496971	-2.56427	-0.33625	2.54094	0.35075	-0.643064	-0.349924	-0.115995	-0.384707	-0.285438	-0.172223	-2.32833	-0.323722	0.568608	3.10821	0.246588	0.572003	0.206803	0.0244903	-0.316124	0.60136	-0.736409	0.65874	-0.322873	0.0444112	3.19421	-0.295303	0.407377	-0.453693	-0.777204	-2.74532	-0.324296	2.19861	-2.73896	0.277361	-2.26622	-0.168488	2.64247
Neural Progenitor Cell;rucaparib;trt_cp;3.33 uM;24 h	-0.272506	0.0857766	-0.29393	-0.168744	-0.451582	-2.47111	-0.251119	-0.083626	-0.326375	-0.339213	2.86075	-0.478822	-0.13898	-0.231153	0.10596	0.395868	-0.223904	-0.380796	0.512766	0.14712	0.854364	0.680928	0.0459316	0.400717	-0.794292	0.196295	-0.078078	0.802842	-0.410774	2.69099	-0.258557	0.665422	3.31397	-0.272999	1.04071	0.594544	0.208142	0.0599955	-0.0303309	0.932399	0.155297	1.18978	0.555792	0.49475	1.11445
Neural Progenitor Cell;idelalisib;trt_cp;3.33 uM;24 h	-0.444228	-0.0736084	-0.284861	-0.165056	-0.661368	-0.409543	-0.434346	-0.240048	-0.246391	-0.0650144	0.109366	0.471763	-0.0914403	-0.528188	0.0835998	-0.0438048	-0.585115	-0.513828	-2.7141	-0.362403	0.323022	-0.595826	0.0115111	0.233045	-2.28952	-0.204879	0.372363	0.701746	-0.335785	2.80586	-0.63939	0.491584	1.05577	-0.489409	0.18122	-0.540098	-0.408754	-0.719578	-0.206435	-0.000409515	-1.09449	0.266333	0.120215	0.0405408	0.74416
Neural Progenitor Cell;TPCA-1;trt_cp;3.33 uM;24 h	0.662295	0.508553	0.792379	2.05865	2.29739	0.136873	0.545387	-0.221954	0.345088	0.458574	2.19189	0.946481	2.29104	-2.21639	2.5744	-0.0933843	2.85267	0.0178885	0.203555	2.67924	3.24138	2.19675	0.31422	2.83155	0.300756	-0.387095	-2.16634	0.780005	-0.727152	2.74166	-0.633497	-0.573924	2.30282	0.907552	-2.54979	-0.362344	-0.497684	-2.92369	-0.627333	0.0961816	-3.61062	0.0101377	0.0753589	-2.98482	0.494218
Embryonic Stem Cell;doramapimod;trt_cp;3.33 uM;24 h	-0.0252488	0.408383	0.0661905	0.409672	0.662578	-0.255586	0.0671704	2.24746	0.487522	0.121205	0.00912786	-3.6257	-3.61762	-3.44027	-0.194821	-2.81354	0.0236957	-2.43653	-0.36147	-0.725395	-0.092573	0.0474001	-3.36867	-2.76945	-2.71291	-0.1469	0.18776	0.0373933	-2.25202	0.514734	-2.32598	0.783867	-2.84427	-0.16529	-2.33906	3.19816	2.96227	-2.71087	2.60256	-0.2276	-3.88454	1.11612	-2.43981	-2.66154	0.0318165
Neural Progenitor Cell;TAK-715;trt_cp;3.33 uM;24 h	-0.427224	2.42028	2.06127	-0.0459745	1.91877	-0.536308	-0.412899	-0.387766	-0.272733	0.157618	0.345554	0.115169	2.43899	2.58938	2.35826	0.0106553	2.6647	0.283462	0.536336	2.80408	3.70893	3.82319	0.63246	2.93479	0.483737	-0.247683	-2.67599	0.177312	-0.653662	2.19755	-0.658753	-0.0417323	3.08289	0.049233	2.67026	-0.00576142	-0.674935	-2.11736	0.0644651	0.42612	-2.4506	-2.25695	0.1424	-2.43739	2.54153
Neural Progenitor Cell;SB-239063;trt_cp;3.33 uM;24 h	-0.257421	2.37319	2.08747	2.21333	0.300874	-1.81107	0.0296047	-0.448872	0.172343	1.72247	2.67144	0.209748	0.412057	2.42352	2.81606	1.82627	2.4455	0.235327	2.48218	2.50697	3.37222	3.22357	0.492668	2.56736	0.0497848	-0.000624636	-2.34358	0.454488	-0.466935	2.42534	-0.501289	-0.124989	3.27719	-0.0299775	0.465645	0.115674	-0.534136	-2.34501	-0.145683	2.39088	-2.61067	-0.0817765	-2.23203	-0.145605	2.63926
Neural Progenitor Cell;chelerythrine;trt_cp;3.33 uM;24 h	-0.0468472	0.360054	-2.24254	0.701084	0.88697	-2.34655	2.84398	0.318132	0.573358	-1.96156	-1.06329	-0.06811	-0.102985	-0.45611	-0.517693	-0.269325	-0.238185	-0.256606	0.75593	0.671966	1.5325	0.48756	1.03965	0.0300174	0.346289	0.247334	2.21638	1.28068	0.335747	2.76075	-2.72566	0.265269	1.76482	0.465874	1.31664	0.938546	0.5393	0.71749	0.372235	0.787369	1.27142	1.15555	0.49564	1.12316	0.780488
Neural Progenitor Cell;KIN001-244;trt_cp;3.33 uM;24 h	2.64035	2.71152	2.62323	2.5812	2.58184	2.14439	2.32571	-0.518917	2.7374	2.38669	2.27156	1.05281	-2.37238	-7.60128e-05	0.242135	0.15631	2.69582	0.110847	0.0282945	2.56227	1.27058	2.78495	0.570869	2.63202	1.78922	-0.456792	-2.65987	1.10869	-0.680251	2.69199	-0.921867	-0.102249	0.420661	0.223751	0.024525	-0.508146	-0.195203	0.41649	-0.616329	2.36069	-3.47959	-2.90023	-0.299454	-2.77782	0.327024
Neural Progenitor Cell;PFI-1;trt_cp;3.33 uM;24 h	-2.55103	-2.09622	-2.16067	-2.39355	-2.61242	-2.60347	-0.326959	-2.20616	-2.42914	-1.95384	2.78714	0.694903	-0.196201	-0.151985	0.0126402	0.257049	-2.45134	0.243843	0.196895	-0.0540231	-0.149497	0.267031	-0.162896	-0.494675	0.279442	0.0897484	0.342969	-0.0270752	-0.192851	2.53708	-0.251661	0.293816	2.52977	-2.97842	-0.235912	-0.271001	-0.0558961	0.0387655	-2.78375	2.5732	-3.6602	0.407076	-0.209877	-2.45272	0.486647
Neural Progenitor Cell;UNC-669;trt_cp;3.33 uM;24 h	-2.50234	-2.03404	-0.103962	-2.45175	-2.519	-2.33256	-2.23037	-0.689278	-2.22758	-0.183636	2.36701	0.198297	-0.108061	0.201014	0.128898	-2.23994	-0.357447	0.0474297	2.11226	-0.0473551	0.53797	2.63491	-0.333241	0.428425	0.492502	-0.103275	-0.255255	0.158234	-0.447383	2.30498	-0.64499	0.359295	3.01108	-0.371272	0.363293	0.105949	-0.248725	0.297999	-0.0101248	2.36428	-2.73432	0.250302	-0.00804198	0.239799	3.12793
Neural Progenitor Cell;AGK-2;trt_cp;3.33 uM;24 h	0.358507	0.395954	0.0538649	0.243291	0.273175	-0.0321505	0.225084	0.074308	0.266337	0.789502	-0.307931	-0.0278096	0.115514	0.027771	-0.050678	-0.146742	-0.179656	-0.445874	0.518712	-0.00684192	1.35955	0.675962	0.515683	0.376183	-0.0189192	-0.00562213	-0.321468	1.07444	-0.580886	0.656826	-0.617825	0.500904	3.36953	0.477195	1.25817	0.868656	0.290586	0.0491034	0.0951184	1.01647	1.15297	3.43966	0.785052	1.05314	3.41611
Neural Progenitor Cell;HMN-214;trt_cp;3.33 uM;24 h	0.0772699	0.035097	-0.291121	0.287755	-0.100766	-0.109115	0.285203	0.335646	0.554096	0.356375	-0.345202	0.438259	-0.584282	-0.566941	-0.241055	-0.461772	-0.962954	-0.571968	-0.518855	-0.407109	0.217839	-0.966049	0.213655	-0.282896	-0.135875	0.312376	0.777954	1.318	0.0411383	1.29922	-0.46315	0.76929	1.19817	-0.562774	0.604329	0.51231	0.132337	0.284459	-0.0773756	0.472687	0.299011	0.708929	0.282513	0.644629	1.04282
Neural Progenitor Cell;AT-7867;trt_cp;3.33 uM;24 h	2.53251	0.644546	0.822255	0.361954	2.49386	0.428836	0.715545	0.192841	0.531247	0.993225	0.261907	0.99895	0.0977206	-0.356665	0.228913	0.370848	0.236422	-0.437128	0.0131875	0.20326	0.966992	-0.208122	0.447299	0.442784	-0.0574108	-0.44989	-0.303819	1.26891	-0.540592	2.60265	-0.556323	0.131928	1.13645	0.192471	0.270564	0.0152373	-0.395988	-0.204668	-0.146334	2.52811	-0.573081	0.217088	0.115777	0.141989	0.830986
Neural Progenitor Cell;IOX2;trt_cp;3.33 uM;24 h	-0.405003	2.39844	1.54916	-0.331822	0.115961	-2.02449	-0.511504	-0.91656	-0.702927	1.93402	0.568314	-0.552299	-0.0885078	2.64019	0.103325	-0.460429	2.87129	0.600849	2.70994	2.77089	3.36567	3.78103	2.69675	2.75261	-1.87469	-0.079098	-2.49838	-0.0727061	-0.715886	2.34123	-0.207916	-0.350579	2.68708	0.643673	-0.00579926	0.0447033	-0.179331	-0.23812	-0.283902	0.541956	-3.27847	-0.301406	-2.28888	-2.935	-0.159962
Neural Progenitor Cell;KIN001-127;trt_cp;3.33 uM;24 h	-1.69626	0.281936	0.147944	0.058747	0.244783	-0.147806	-1.88496	-2.32225	-0.0783022	0.565529	2.55493	0.3821	-0.129735	0.113119	0.531904	0.0962296	-0.0923983	-0.0167303	0.140406	2.27499	0.88137	2.78009	0.683149	0.681998	-0.548599	-0.024015	-0.315527	0.693548	-0.540591	0.571671	-0.151271	0.216942	1.00153	-0.157718	2.61778	0.00815912	-0.208643	0.453093	-0.23884	-0.224433	-2.52851	0.460415	-0.228687	0.501363	2.53122
Neural Progenitor Cell;MGCD-265;trt_cp;3.33 uM;24 h	-2.64592	-0.00731492	-0.312503	-0.295835	-2.65662	-2.63671	-0.32509	-0.54699	-2.53844	-2.19983	2.6789	-0.0103711	-0.316074	-0.127277	0.0844178	1.87061	-2.24512	0.0593912	-0.314719	0.00851973	0.393433	2.82218	-0.0589179	0.143192	0.0450336	-0.106888	-0.247276	0.251374	-0.346303	2.86796	-0.341246	0.339678	3.25856	-2.86401	2.31454	-0.0396387	-0.532107	0.00629013	-0.132439	0.29349	-2.90979	0.362181	-2.46665	-0.0852229	2.50856
Neural Progenitor Cell;ibrutinib;trt_cp;3.33 uM;24 h	1.7318	2.32347	0.613461	-0.0743167	0.0755795	-2.22771	2.07309	-2.09544	0.341554	-0.00491618	-0.213006	-0.214987	-2.76241	-0.520461	-0.159688	-0.075646	2.46744	0.260239	2.0279	2.4314	0.961912	3.2365	2.7948	2.29253	-0.193955	-2.30661	-0.261921	0.646531	-0.734083	2.72485	-2.43935	0.145095	0.207476	-0.217121	-2.3014	-0.160177	-0.0989849	-0.125814	-0.485243	0.428839	-4.07751	-2.14365	-2.60499	-3.05818	-2.6996
Neural Progenitor Cell;BRD-K55591206;trt_cp;3.33 uM;24 h	-1.94329	0.1723	0.236978	-2.10533	-2.24532	0.0444608	-0.543074	-1.00666	-2.14875	0.25927	2.79781	0.561306	-0.122381	0.231038	2.44348	0.0654126	-0.0896908	0.128463	0.0426435	-0.0642018	0.67521	2.50118	0.216256	0.273173	-1.81527	-0.131216	-0.0730334	0.323931	-0.487593	2.61941	-0.464728	0.157615	2.71982	-0.25266	0.152809	-0.00244267	-0.453236	0.365738	-0.380343	0.0568654	-2.90373	0.158646	-2.71022	-0.0151708	2.43111
Neural Progenitor Cell;FR-180204;trt_cp;3.33 uM;24 h	-0.238936	0.0456365	-0.0120718	-0.411115	-0.0957741	-0.0437551	-0.107802	-2.44696	-0.233253	0.201425	2.46734	0.498757	-0.54763	-0.638223	-0.102639	-0.0513342	-0.427896	-0.440444	-2.17754	-0.282207	0.364779	-0.103054	0.181226	-0.096191	-2.306	-0.190855	0.208112	0.797024	-0.437841	2.66225	-0.454885	0.374146	0.609068	0.0121178	-2.43432	-0.447685	-0.534378	-2.73308	-2.58696	2.19056	-3.814	0.127204	-2.58645	-2.84525	0.374476
Neural Progenitor Cell;XMD-892;trt_cp;3.33 uM;24 h	-2.95437	-2.53559	-2.70251	-2.93283	-2.90897	-2.76042	-2.70021	-2.28584	-2.80205	-2.22084	2.63172	0.754198	-0.430422	-0.281169	0.0456318	0.0452764	-2.53366	-0.19179	-2.41929	-0.439408	0.134581	0.162183	-0.189752	-0.394263	-1.95552	0.170435	0.256459	0.822313	-0.555358	0.821693	-0.316121	0.344681	1.47267	-3.0564	0.384651	-0.047816	-0.272678	0.0588582	-0.911769	2.89241	-3.09112	0.811816	-0.25414	0.0655693	2.69519
Neural Progenitor Cell;SGX-523;trt_cp;3.33 uM;24 h	-0.299143	2.32793	0.220327	0.388592	0.409715	-2.30559	0.0173796	-0.39249	-0.121788	1.81679	0.140095	-0.209204	-0.0124281	0.0443128	0.343064	0.300607	0.0305756	0.193593	2.33035	2.33335	1.21059	3.30587	0.725955	0.690802	-0.00412734	-0.157678	-2.30075	0.759294	-0.659437	2.5464	-0.497856	-0.0293374	3.46461	-0.100763	2.87794	0.418285	-0.471576	0.0514825	0.198441	2.31287	-2.30784	2.30175	0.0187978	0.408854	2.64915
Neural Progenitor Cell;CTB;trt_cp;3.33 uM;24 h	-2.38033	-0.0135342	-0.0997369	-2.33732	-0.887854	-2.52698	-2.42333	-0.619954	-0.681719	-0.218009	2.57889	-0.539947	-0.120298	0.0678601	-0.0176543	-0.125168	2.38448	0.198815	2.42877	2.2834	0.870275	3.36282	0.148996	0.705378	-1.77493	0.231629	0.0299696	0.252521	-0.570928	2.33343	-0.271369	0.443069	3.20116	-0.245385	1.99462	0.0508163	-0.0167549	-2.25911	-0.0861949	0.147653	-2.88445	2.47134	-2.30594	-2.31075	-0.324957
Neural Progenitor Cell;ponatinib;trt_cp;3.33 uM;24 h	-0.291269	2.33799	-0.439986	2.27796	2.30411	-0.301757	0.306487	-0.174075	0.298306	0.0617942	-0.242864	0.140354	-3.1092	-0.895064	-2.37156	-2.33083	0.45658	0.230479	0.22228	-0.17081	3.18926	2.31613	0.296103	0.17088	0.287347	-2.48559	-2.38056	2.70716	-0.633994	2.97542	-2.53077	-0.446904	0.948533	0.338326	0.406744	0.302971	-0.291233	0.175966	0.572935	3.1171	-0.318918	0.00388093	-2.87255	-0.381487	0.61661
Neural Progenitor Cell;ALW-II-38-3;trt_cp;3.33 uM;24 h	-0.406621	2.17069	2.10629	2.24892	0.286285	0.321627	1.84624	-2.02916	0.282147	0.454006	0.288255	0.519083	0.627899	2.76438	0.378047	-0.0572494	0.188973	0.262763	2.5657	2.24487	3.37474	2.83406	0.40876	2.6969	-1.62472	-0.293249	-0.478108	0.352496	-0.269848	2.67112	-0.566605	0.0893111	3.29765	0.174395	0.549578	0.132807	-0.00310639	0.131245	0.048113	0.225551	-0.423905	-0.270919	-0.0252952	0.606676	2.64837
Neural Progenitor Cell;NVP-BHG712;trt_cp;3.33 uM;24 h	-1.92864	0.153106	0.195911	-0.121624	-2.22139	-2.0394	-0.364531	-0.613878	-1.86585	0.374334	0.533263	0.470474	-2.88918	0.096287	-0.0611885	-0.364069	0.186749	0.19157	-0.0175487	-0.0317802	0.688082	2.71448	0.286593	2.4718	0.542848	-0.595021	-0.485314	0.432204	-0.80602	2.7544	-0.650591	-0.265059	3.1192	2.08694	1.89741	-0.228727	-0.342642	-2.32162	-2.63205	2.4251	-3.24117	0.11021	-2.3429	-3.07488	-0.318884
Neural Progenitor Cell;iniparib;trt_cp;3.33 uM;24 h	0.195955	0.433844	0.293232	0.197263	0.122268	-0.276311	0.213302	-1.88746	-0.00580724	0.458222	2.32283	-0.397158	-0.199149	-0.0576849	0.0439574	-0.0377601	0.506139	-0.00283811	2.51128	2.32211	1.08623	3.05591	0.677943	0.781915	-0.527634	0.0905987	-0.12556	0.9037	-0.454389	2.51421	-0.485049	0.49861	3.03526	0.291965	2.28464	0.120954	-0.305235	-0.0360783	0.0248127	2.46349	-2.54914	0.648188	-2.40613	0.179011	2.49406
Neural Progenitor Cell;KIN001-055;trt_cp;3.33 uM;24 h	-2.84215	-2.46013	-0.269166	-2.42365	-2.95934	-2.52453	-2.6301	-2.32279	-2.52911	-0.328951	0.450816	0.699118	-0.395638	-0.170808	0.20032	-0.0440788	-0.64492	-0.173745	-2.55808	-2.66619	0.459357	-0.0211376	0.165922	0.0460153	-2.3394	-0.063909	-0.123069	0.602018	-0.344002	2.82889	-0.413128	0.515704	3.42108	-2.77806	0.264242	-2.97624	-0.857048	-2.44603	-1.92246	-0.376209	-3.3302	0.0393344	-2.41858	0.236877	2.87267
Neural Progenitor Cell;GNF-2;trt_cp;3.33 uM;24 h	-2.65863	0.114756	-0.196042	-0.0301725	-0.504115	-2.57254	-2.26148	-0.707989	-2.63174	-0.485007	2.88715	0.0410294	-0.127532	0.0492267	0.323649	2.21909	-0.261063	-0.388496	2.3022	0.118624	0.937546	3.13725	0.429322	0.489242	-2.38612	0.313537	-0.144871	0.440929	-0.407316	2.49826	-0.221437	0.509304	3.4	-0.0519951	2.40679	-0.365486	-0.819109	-2.7144	-0.263702	-0.148281	-2.68321	0.386992	-2.58063	0.12695	2.32767
Neural Progenitor Cell;motesanib;trt_cp;3.33 uM;24 h	-0.198782	0.0935593	-0.129132	-2.39152	-0.380162	-0.694911	-0.10569	-2.10734	-0.44554	-0.313979	0.0800482	-0.066039	-3.06031	-2.79391	-0.225074	-2.11223	-0.00068207	-0.0487577	-2.17606	-0.146955	0.495148	2.86967	0.371885	0.170212	-2.36521	-0.515897	-0.135637	0.675659	-0.622441	2.80012	-2.5284	0.185402	0.731859	0.0148807	-2.65857	-0.624748	-0.855946	-2.72836	-2.4964	0.119875	-4.4089	-0.13497	-2.95739	-3.12441	-2.26118
Neural Progenitor Cell;GSK-2334470;trt_cp;3.33 uM;24 h	-0.125675	2.44716	1.96032	2.25284	-0.0892678	-2.05679	2.19605	-0.683808	0.0605696	0.152052	2.58099	0.780932	0.0938284	0.18369	0.4532	-0.0715663	-0.345602	-0.186828	-2.15336	-0.121202	0.756814	0.21717	0.251046	0.305098	-2.09726	0.0018766	-0.163049	0.808843	-0.446175	2.85207	-0.50456	0.424546	3.17918	-0.385095	0.732141	-0.00852066	-0.430821	-0.061144	-0.294661	0.259581	-0.478846	0.235856	-0.142116	-0.0136882	2.80341
Neural Progenitor Cell;BRD-K29983336;trt_cp;3.33 uM;24 h	-2.36204	-0.0937594	-0.269883	-0.291339	-0.599826	-2.2819	-2.07918	-2.05936	-0.447112	-0.208452	0.563954	0.511061	0.0280238	-0.0310279	0.391539	0.246686	-0.588624	-0.332408	2.15498	0.0888188	0.620569	0.441095	0.395574	0.301823	0.159959	-0.0369556	-0.0378697	0.831923	-0.594261	0.939371	0.081078	0.678639	3.09156	-0.49825	0.550793	-0.26419	-0.429961	-0.398069	-0.765954	0.589213	-0.825967	0.32228	0.136088	-0.119711	2.73414
Epithelial Cell;piketoprofen;trt_cp;3.33 uM;24 h	-0.5185	0.00504524	-0.158419	0.285083	-2.46188	0.422652	0.198789	0.0174397	-0.319828	-0.531536	-3.26659	0.652908	-3.72472	-3.96091	-3.41764	-3.31728	-3.06418	-2.82026	0.330479	-0.0913079	-3.83469	-2.65724	-0.415498	-2.9628	-2.18795	-2.55703	0.163444	-0.882933	-0.122934	-0.350666	0.536195	3.1048	-0.0783826	-0.511661	2.75559	0.439907	3.01738	3.01702	-2.47319	-0.233539	2.82679	0.298782	-0.242649	3.00307	-3.05404
Epithelial Cell;temsirolimus;trt_cp;3.33 uM;24 h	-2.79944	-2.0737	-0.449279	2.42693	2.50085	-2.29167	0.0413437	-2.59526	-0.0147803	-2.46875	-0.0152737	0.309629	-2.86459	2.18132	0.134492	-0.782563	0.0800601	0.783149	0.158609	-0.652794	-0.842353	-0.156751	-0.625036	2.38553	2.118	-0.980744	-0.078937	-0.584203	-2.61313	0.623006	0.0952928	2.9127	-0.447322	2.71836	3.10131	-0.174192	0.467321	0.186456	3.06669	-3.1953	0.28076	1.81049	-0.536397	0.158983	-3.06136
Neural Progenitor Cell;GSK-J2;trt_cp;3.33 uM;24 h	-2.19311	-0.0403769	0.151687	-2.4083	-0.753585	-0.51413	-2.32861	-2.46962	-0.659533	-0.304243	0.167892	-0.223209	0.0755518	0.222443	0.252297	0.115715	0.0284924	0.144169	2.15439	-0.395582	1.03842	2.95392	0.00416481	0.776811	-2.1742	0.408329	4.35448e-05	0.416521	-0.29118	2.43161	-0.379052	0.522195	2.96959	-0.120373	0.351201	-0.0192632	-0.269335	-0.00878387	-0.343908	0.200335	-2.69134	0.307426	-2.36855	0.423698	2.4244
Neural Progenitor Cell;dabrafenib;trt_cp;3.33 uM;24 h	-2.54201	-2.3451	-1.82225	-0.0812087	-0.52455	-2.49324	-0.414099	-0.0308199	-2.39907	-0.428776	0.188794	0.404183	2.77322	2.46496	2.48668	0.371946	2.38083	0.0643988	0.495339	3.07509	3.49461	3.07598	0.140398	3.02806	0.298123	0.55661	-0.293949	-0.212385	-0.502848	2.63207	-0.334115	0.115628	2.97619	0.665587	-0.0371373	0.172729	-0.155748	-3.26476	-0.60183	0.113637	-2.9006	1.94108	2.5386	-2.5329	2.41213
Neural Progenitor Cell;RG-108;trt_cp;3.33 uM;24 h	0.314478	0.663639	0.466195	0.266468	2.14141	-0.00345202	0.116599	-0.387137	0.267572	2.84552	0.732841	0.650188	0.0620933	2.95971	2.64926	0.143529	3.20975	0.548389	0.399455	0.62227	3.78616	3.83235	2.92009	3.06157	0.431635	-0.591203	-2.85304	0.721838	-0.861326	2.42496	-0.620202	-2.81485	3.12787	0.576516	2.22235	-0.0558278	-0.460024	-0.122345	-0.224171	0.467591	-2.80801	-0.643886	-2.13228	-2.66871	-0.161325
Neural Progenitor Cell;BRD-K09991945;trt_cp;3.33 uM;24 h	-0.130142	0.0963861	-0.0740229	-0.329259	-0.0627758	-0.00558529	-0.302449	-2.39829	-0.231935	-0.161235	0.0925823	0.0518275	-0.379198	-2.48627	0.0349773	0.200114	-0.0749114	-0.280679	0.00452524	-0.044864	0.867307	2.84021	0.51053	0.415676	-2.53151	-0.480072	-0.200134	0.740917	-0.466947	2.73289	-0.493825	0.517152	0.739479	-0.324748	-0.0722521	-0.401984	-0.300739	-2.8629	-0.273315	2.53935	-3.70002	0.125491	-2.56137	-2.72335	0.16665
Embryonic Stem Cell;GDC-0068;trt_cp;3.33 uM;24 h	-0.137867	0.175455	0.0274431	-0.0532314	0.412747	-0.107002	-0.0563827	0.268846	0.28009	0.103257	0.0780995	-3.21137	-3.42684	-3.0615	-0.108722	-2.64659	-0.0579829	-2.49839	-2.70974	-2.96304	-2.83021	0.184298	-3.42469	-2.67516	-2.93926	-0.079423	0.282962	0.0512974	-0.456644	0.550736	0.271842	0.843943	-2.86878	-0.0934656	-2.64012	0.187652	0.285196	-2.83295	2.68818	-0.344861	-4.11935	0.914977	-3.3915	-2.90382	0.00207005
Embryonic Stem Cell;BRD-K09991945;trt_cp;3.33 uM;24 h	0.184618	0.597933	0.331693	0.503523	0.701112	0.0427331	0.290918	-0.0402594	0.52347	0.302934	-0.211647	-3.58852	-3.65282	-3.538	-0.214046	-2.80211	-0.354072	-2.4991	-0.482146	-3.29804	-0.261161	-0.0428188	-3.46826	-1.16616	-2.65261	-0.255213	0.565652	0.174143	-2.41918	0.709699	-0.0575299	1.01812	-2.87216	-0.241219	-2.32013	3.13387	3.1735	-2.64195	2.70222	-2.42853	-4.00708	0.769383	-2.75172	-2.68761	0.179557
Neural Progenitor Cell;dasatinib;trt_cp;3.33 uM;24 h	-0.310962	2.39682	-0.371708	2.09675	2.0601	-0.449462	0.0289317	-0.596972	1.72596	1.59853	0.307928	0.0415599	-0.13123	-0.00213556	0.229484	-0.137348	2.61023	0.343637	2.22585	2.53654	3.41796	3.32777	2.9273	0.485929	-2.07635	-0.111403	-0.281753	0.67636	-0.608877	2.95167	-0.405827	0.0942218	2.75324	0.29151	2.05635	-0.0246767	-0.316345	0.12508	0.0370758	2.46766	-3.27709	0.165766	-2.28932	-2.89154	-2.33985
HSC;GSK-1059615;trt_cp;3.33 uM;24 h	-2.56086	-3.2701	-3.00377	-4.00194	-0.582256	-2.25992	-2.80903	2.0182	-2.80866	-2.47643	0.406211	2.83731	-0.522593	-3.13129	0.262335	0.416787	-0.672999	-3.06139	-2.54299	-3.12516	-3.50725	-0.433333	-0.277477	-2.60862	-0.106717	0.973156	0.498512	1.0685	-0.303531	0.497252	0.185573	2.87207	0.671389	-2.62583	0.786363	0.264002	-0.212143	0.18876	-2.411	3.23567	0.552747	1.00987	-0.118154	0.298374	3.21113
Neural Progenitor Cell;dacomitinib;trt_cp;3.33 uM;24 h	2.05232	2.12197	2.19093	2.13747	2.21642	-0.0588623	2.14554	1.84524	0.49507	0.0104003	-0.260958	0.28032	0.159523	-2.72595	0.302683	-2.26874	0.219008	0.115826	0.364378	2.48008	0.736355	0.625442	0.409469	2.52473	-0.166629	-0.288106	0.0666771	0.799497	-0.183704	2.85545	-2.28016	0.226066	1.21579	0.20338	-0.385732	-0.0467262	-0.263358	-0.453252	-0.0289442	2.77681	-4.08731	-0.0377836	0.213696	-3.13646	0.116552
Embryonic Stem Cell;SB-525334;trt_cp;3.33 uM;24 h	-0.049783	0.397812	0.0298858	0.394119	0.453259	-0.255867	0.0899967	2.33435	0.344816	0.0833254	-0.161667	-3.57246	-3.61371	-3.31547	-0.139116	-2.70597	-0.14173	-0.324044	-0.0703974	-0.673485	-0.216474	0.0401897	-3.31826	-2.47936	0.0942979	0.0971303	0.529838	2.47273	-2.4855	3.25395	-2.42213	0.835119	-2.27721	-0.172187	0.367028	3.20338	3.2255	-2.84132	2.67414	2.47465	-3.66108	0.769453	-2.44122	-2.65605	2.54442
Neural Progenitor Cell;wortmannin;trt_cp;3.33 uM;24 h	-0.256249	-0.401317	-0.268014	-0.626045	-0.613787	-0.122354	-0.942794	-0.561768	-0.83776	-0.188799	0.420375	3.60199	0.433102	0.646555	0.741304	0.25163	2.79846	0.518841	-0.214872	0.211713	0.0512213	0.292608	0.260089	-0.277207	2.19067	2.42321	-2.73673	0.281288	-0.537737	2.43691	0.674049	-0.524055	-2.51835	-2.74285	-0.401752	-0.569585	-0.264665	0.363199	-2.5078	0.0663153	0.223599	-0.456535	-3.10963	0.234907	-0.245258
Neural Progenitor Cell;GSK-J1;trt_cp;3.33 uM;24 h	-0.619556	2.26015	0.641259	2.18641	0.61503	-2.12589	-0.282567	-0.791901	0.40815	2.25693	2.75753	-0.121544	0.042462	0.252143	2.65486	0.095825	2.42725	0.408333	2.69734	2.55274	0.933609	2.94683	0.505463	2.65086	0.187642	-0.326049	-0.369446	0.356828	-0.459433	2.65643	-0.284897	0.260469	3.09612	0.0666469	0.145838	0.213538	-0.401625	-0.290014	-0.0863955	0.356371	-3.14052	0.00119258	-0.363052	-2.88402	0.106727
Neural Progenitor Cell;EX-527;trt_cp;3.33 uM;24 h	-0.434825	0.291408	-1.83379	-2.30066	-0.282261	-2.13634	-0.415496	-0.555262	-1.9528	1.59924	3.05899	0.286699	-0.141113	-0.0507221	2.94549	-1.68827	0.00999521	0.197771	2.49403	2.28326	0.471825	0.614514	0.0318641	0.417267	0.106418	-0.158866	-0.413331	0.415248	-0.578079	2.53008	-0.388584	0.00625947	1.28393	0.0332213	2.16988	0.259309	-0.211613	0.171136	-0.0710688	2.43893	-2.84043	0.27267	-0.307236	-0.0289626	2.73969
Neural Progenitor Cell;nilotinib;trt_cp;3.33 uM;6 h	-2.74149	-2.43468	-2.49239	-0.107124	-3.18974	-0.408654	-0.863923	2.37806	-2.69769	-0.297103	0.446016	0.905639	-0.262	-0.193356	0.581885	3.01871	-3.52206	-0.397675	-2.64136	-0.766396	-0.629251	-2.60968	-0.758794	-2.06251	0.0512858	0.61425	0.111056	0.0513034	0.46735	0.300801	0.135723	1.15866	3.33189	-3.96108	0.196482	-0.167865	0.492265	-0.804311	-2.86162	2.37148	-0.480002	0.120326	3.06619	-0.28307	2.7483
Neural Progenitor Cell;cabozantinib;trt_cp;3.33 uM;24 h	2.49488	2.39452	2.36065	-0.0127305	2.32847	0.196483	0.537219	-0.200279	2.26171	0.846738	0.245796	0.150737	-2.79996	-2.54601	0.113507	-0.502072	0.461086	-0.00507063	-1.85044	0.141249	0.845519	2.78792	0.524632	0.419943	-2.26265	-0.511086	-0.352814	0.96835	-0.783542	2.67046	-2.77256	-0.208416	0.388959	0.375826	-2.5733	-0.388151	-3.22734	-2.37397	-0.420708	0.0928776	-4.14966	-0.466385	-3.47351	-3.2901	-1.99127
Embryonic Stem Cell;amuvatinib;trt_cp;3.33 uM;24 h	0.0931893	0.242045	0.154528	0.172377	0.367055	0.0319448	0.0728559	0.184807	0.312979	0.0892153	-0.170131	-0.897809	-3.60909	-3.2942	-0.138892	-2.8496	-0.688313	-2.76832	-0.504949	-0.826363	-3.02127	-0.139063	-3.54574	-2.71898	-2.63448	-0.112381	0.476934	-0.0397417	-0.280239	0.542807	2.28918	1.28243	-3.11486	-0.431933	-2.53384	2.95432	3.06095	-0.669858	2.56522	-0.143514	-3.88594	0.842737	-2.96843	-2.56159	0.337351
Embryonic Stem Cell;vandetanib;trt_cp;3.33 uM;24 h	-0.440103	0.0139535	-0.281709	-0.254215	-0.0092813	-0.614222	-0.302822	-0.143419	0.128995	-0.380489	-0.34346	-3.64605	-3.88746	-3.65989	-0.64301	-3.01063	-0.666842	-2.64795	-3.253	-3.49975	-3.46659	-0.26467	-3.67587	-2.7616	-2.86086	0.0111988	0.807748	0.233649	-2.49626	0.63326	-0.0331477	1.21134	-2.93089	-0.839623	-0.0700034	3.27493	3.54481	-0.643381	2.80612	2.18329	-3.69089	2.82331	-2.92146	0.0211313	0.291178
Neural Progenitor Cell;GSK-429286A;trt_cp;3.33 uM;24 h	-0.0461473	0.0320929	0.0335363	-0.149426	-0.275634	-0.120451	-2.5265	-0.294481	-0.123138	0.196873	0.470006	0.228706	0.307928	0.381864	0.465658	2.18058	0.114706	-0.459985	2.38741	2.4568	1.11777	3.19287	0.252961	3.03949	2.14138	-0.0558529	-2.41879	0.561559	-0.579587	0.460239	-0.113899	0.250142	3.0769	-0.0443886	2.93818	0.298194	-0.221193	-0.635789	-0.339163	2.18836	0.405807	0.407546	2.46918	0.138432	3.06336
Neural Progenitor Cell;sunitinib;trt_cp;3.33 uM;24 h	1.61967	0.278369	1.69702	-1.92987	1.76775	-0.0322661	0.530551	-1.78302	0.223695	0.483179	0.0633542	0.864961	-0.123501	-2.59196	-0.139506	-0.686939	0.139843	-0.268695	0.0382802	2.63091	0.768592	-0.309	-0.083415	0.159733	-0.164246	-2.36736	0.143208	0.984021	-0.746635	3.00947	-0.682222	-0.224361	0.41154	0.191492	-0.600627	-0.0539212	-0.177	-0.205731	0.29033	3.03176	-3.66617	-0.0573044	-0.343315	-0.482887	0.832424
Neural Progenitor Cell;C-646;trt_cp;3.33 uM;24 h	-0.594458	0.263808	-0.568573	-0.340876	0.644458	-0.542916	-0.392813	-0.772918	-0.505746	-0.21145	2.72329	0.056241	0.0608503	2.39512	0.178087	-0.0592979	2.75071	0.516542	2.45554	0.248483	3.21889	3.51069	0.314338	2.55858	0.233054	-0.352211	-2.61854	0.516782	-0.74297	2.53715	-0.661047	-0.217613	2.73191	-0.11784	1.92378	0.0968389	-0.366943	-0.227818	0.0344863	2.71465	-3.11763	-2.03396	-2.24183	-2.92994	2.68005
Neural Progenitor Cell;GDC-0068;trt_cp;3.33 uM;24 h	3.18774	2.7309	2.84367	0.376782	2.92693	0.858137	2.88868	0.398133	3.12803	2.92787	0.411451	1.34502	0.55834	0.578349	0.658314	0.315664	0.0385891	-0.322411	2.17723	2.77437	1.16279	2.36511	0.431589	0.907218	0.183679	-0.299134	-0.213889	0.917391	-0.214194	0.728389	-0.373304	-0.0704698	0.849489	0.572941	1.11566	-0.0976927	-0.176979	-0.107287	-0.685995	0.622807	-0.0905811	-0.543457	0.409561	-0.108106	0.296028
Neural Progenitor Cell;regorafenib;trt_cp;3.33 uM;24 h	-2.17602	2.55991	-2.01287	2.4171	0.0691106	-2.50448	-0.306388	-0.685516	-2.20066	-2.05321	-0.0486485	-0.140372	-3.07861	-0.192274	-0.417805	-0.432283	0.0906613	0.480812	0.462809	0.00642273	0.847179	3.17687	0.505339	0.418827	-0.133176	-0.372003	-0.243875	0.511401	-0.686053	2.89991	-0.685672	0.0948317	3.1302	-0.0845628	-0.291953	0.0133551	-2.9824	-0.206232	0.322672	0.329668	-3.22571	0.210982	-2.75246	-2.66117	0.0963654
Neural Progenitor Cell;RAF-265;trt_cp;3.33 uM;24 h	-3.32474	-0.569744	-2.97681	-2.47773	-0.818279	-2.78087	-2.73883	-2.08728	-2.67906	-2.88226	2.3266	0.0365475	-3.25466	-0.692073	-0.335931	-0.172074	-0.0998276	-0.0948215	-2.37919	0.0665694	0.395672	0.500224	-0.520983	0.320529	-1.73654	-0.226742	0.115597	0.086848	-0.601747	2.81395	-0.464066	0.19919	2.22549	2.17348	-0.404649	-0.0911056	-0.394617	-2.83491	-0.136806	0.194333	-3.56261	0.55994	-0.2367	-2.93047	2.58096
Bone Marrow Stem Cell;SGI-1776;trt_cp;3.33 uM;24 h	0.423205	0.31136	-1.85346	0.920101	-0.0979581	-0.623477	2.71712	2.06248	-0.187068	-0.0559191	0.279801	-0.119541	2.93609	0.14226	0.240196	2.41797	-0.484477	3.21786	-2.33591	-0.0365902	-2.71521	-2.72344	0.00129759	-0.589293	-0.240906	0.277804	-0.45188	3.88209	-0.333647	2.82892	2.36667	2.31699	0.108993	1.97795	-3.17851	2.69328	0.842891	2.53193	3.12677	-0.540363	-3.28864	-0.00747531	-3.65555	-2.56884	0.0767759
Neural Progenitor Cell;QL-XI-92;trt_cp;3.33 uM;24 h	-1.8905	2.26215	0.200632	-0.189835	-0.146426	-2.09199	-0.0253387	-0.48786	-0.103096	0.254184	2.42954	0.170453	-0.223067	0.107641	0.240522	0.114793	0.00465966	-0.0983476	2.2282	2.50523	1.02745	3.40496	0.469304	2.67725	0.413226	0.235046	-0.189636	0.440005	-0.500119	0.532669	-0.448058	0.487201	2.9707	-0.113564	2.56049	0.245126	-0.182487	-0.244674	-0.625084	0.455262	-0.36568	0.436258	0.376711	-0.293451	0.744301
Embryonic Stem Cell;KIN001-244;trt_cp;3.33 uM;24 h	0.0731154	0.434545	0.160941	0.129926	0.648575	-0.0114314	0.00548307	0.209486	0.380984	0.194896	0.159963	-1.10383	-3.54372	-3.15643	-0.0876217	-2.72739	0.0476986	-0.332892	-0.153939	-0.740145	0.00450697	0.207725	-3.12861	-0.903646	-2.40019	-0.117274	0.451359	2.54801	-0.539216	0.681414	-2.04994	0.729996	-2.54992	0.165643	-2.51221	2.9999	3.04089	-2.71717	2.67702	-0.128829	-3.92837	1.0575	-2.80502	-2.63877	-0.0527102
Embryonic Stem Cell;AZD-9291;trt_cp;3.33 uM;24 h	-0.030442	0.374416	0.0460695	0.293892	0.681197	-0.000983573	0.0731726	2.19468	0.457122	0.157804	0.0497616	-3.56888	-3.67099	-3.26671	-0.120365	-2.76151	-0.113438	-2.44078	-0.164765	-0.711599	-0.152465	0.112961	-3.17944	-2.59426	-2.59032	-0.199183	0.531971	2.57595	-2.26186	0.715939	-2.34803	0.762072	-2.61726	-0.292154	-2.29021	3.22769	3.28034	-0.431047	2.70399	0.101872	-3.97165	2.37962	-2.67977	-2.80457	-0.13359
Endothelial Cell;nicotinamide;trt_cp;3.33 uM;24 h	0.492547	0.729941	0.526286	1.11491	0.696917	0.0487203	0.600339	-0.499657	0.125075	0.206282	-2.44011	-4.62565	-0.25479	-2.31232	0.255222	2.29488	-0.0148855	0.971498	1.07516	-2.23552	-0.135359	2.60672	3.92943	1.88858	0.287911	-0.45101	-1.81599	3.44168	2.83777	-0.111433	2.82176	-2.11322	-0.751056	0.211268	-0.678789	0.617326	0.320187	-0.362821	0.404542	-0.0771893	2.64026	2.23406	-0.36413	2.9424	-3.49238
Embryonic Stem Cell;A-66;trt_cp;3.33 uM;24 h	-0.331893	0.141905	-0.131406	0.0503088	0.216955	-0.375482	-0.174081	-0.139842	0.211135	-0.163111	-0.279463	-3.38178	-3.70096	-3.43684	-0.424924	-2.80307	-0.372126	-2.77312	-0.536165	-3.10884	-0.521513	0.0724439	-3.46117	-2.77636	-2.83842	-0.00327069	0.64042	0.225966	-2.46812	0.693668	-2.22067	1.31396	-2.84512	-0.611329	0.0340429	3.11833	3.20243	-0.578438	2.56489	0.100124	-3.51352	1.09722	-2.8328	-2.28416	2.59545
Embryonic Stem Cell;WZ-7043;trt_cp;3.33 uM;24 h	-0.331431	0.0283437	-0.100004	2.04459	2.57191	-2.09393	-0.265377	-0.164807	0.311047	-0.144508	2.52547	-3.53575	-3.46117	-2.98489	-0.111338	-2.93484	0.177298	0.322315	-0.57238	-2.87115	-2.63058	0.433346	-3.19642	-1.14772	-2.43787	-1.89919	0.410567	-0.0409871	-2.40496	0.699017	-0.101573	0.788585	-3.01452	-0.209557	-2.42132	0.635284	3.34704	-0.235006	2.92435	0.1575	-3.75244	0.903744	-3.29899	-3.06134	-0.357254
Embryonic Stem Cell;KIN001-270;trt_cp;3.33 uM;24 h	0.192365	0.626204	0.336146	0.436851	0.709442	0.0779904	0.219546	0.18698	0.552871	0.268894	0.211605	-3.35802	-3.57488	-3.18596	0.117168	-2.74754	0.107561	-2.32275	0.124418	-0.463172	0.18418	0.519244	-2.88119	-2.59176	-0.285299	-0.111552	0.321522	2.3604	-2.2897	0.6524	-0.199813	0.735633	-2.41281	-0.13905	-2.31492	3.0044	2.86759	-2.56449	2.5177	0.0472667	-4.01797	2.30183	-2.67709	-2.72316	-0.366149
Neural Progenitor Cell;garcinol;trt_cp;3.33 uM;24 h	0.0256027	2.61419	2.03837	2.31145	0.85075	-1.99294	-0.155198	-0.825533	0.687817	1.93437	2.572	-0.623075	0.297449	2.45378	0.447982	-2.25092	2.85204	0.539955	2.79881	2.47697	3.81737	3.39236	0.614953	2.71781	-0.0689244	-0.232585	-2.31958	0.548561	-0.553532	2.62585	-0.569523	-0.0284075	3.01545	0.482137	2.16461	0.591468	-0.150536	0.194477	0.604977	0.244305	-2.99043	-0.118442	-2.14115	-2.40755	0.0895861
Neural Progenitor Cell;PF-573228;trt_cp;3.33 uM;24 h	-0.563956	0.705783	-0.300562	0.142848	-0.63484	-0.61992	0.137615	-0.266038	-0.249183	0.0766001	2.94545	0.815898	0.0854974	0.182625	2.70305	-0.0391334	-0.0279233	0.193576	2.13264	2.33347	0.728301	2.87762	0.171769	2.16353	0.374926	-0.348094	-0.300322	0.441232	-0.48737	2.55508	-0.217845	-0.169703	3.19423	-0.28976	-0.00478951	-0.111772	-0.593135	-2.55384	-0.457895	2.6642	-3.61316	-2.24749	-0.12882	-3.13207	2.51209
Neural Progenitor Cell;SB-525334;trt_cp;3.33 uM;24 h	-0.166073	0.135998	-0.0864007	-0.184121	-0.0273899	-0.412509	-0.168618	-2.32794	-0.0710398	-0.105375	-0.31298	-0.0336289	-0.577237	-2.95723	-0.104773	-0.456385	-0.32042	-0.442085	-0.213047	-0.488495	0.383385	-0.268146	0.0652903	-0.0141765	-2.46748	-0.517237	0.330333	0.986564	-0.622261	2.8735	-0.821601	0.566668	1.10735	-0.0835293	-0.197775	0.0725786	-0.179236	-0.323061	-0.0209984	0.387356	-3.60214	0.38086	-0.445969	-0.418007	0.377155
Neural Progenitor Cell;A-66;trt_cp;3.33 uM;24 h	2.87886	2.78172	2.65198	0.0659703	2.74682	0.21719	2.73826	-0.572781	2.72459	0.863348	-0.0289983	0.112908	-2.6283	-2.32296	-0.142559	-2.08014	0.350279	-0.0878673	0.789384	2.72171	1.25751	3.01188	1.20624	0.311309	0.14948	-0.186726	-0.23896	1.38337	-0.616034	3.07093	-2.43821	-0.193126	0.577314	0.546111	0.355133	0.110594	-0.0769353	0.596228	-0.282871	2.82527	-3.46229	0.10405	-2.94204	-0.155123	-0.143907
Neural Progenitor Cell;JQ-1-R;trt_cp;3.33 uM;24 h	-2.88857	-0.0987024	-0.339736	-2.35112	-0.597921	-2.74786	-2.62602	-0.503893	-0.793695	-0.61933	2.79311	-0.139777	-0.36392	-0.334569	-0.0654639	-0.267886	0.00233531	-0.053487	0.140255	-0.0299481	0.493687	0.611853	-0.205791	0.380089	-0.0394427	-0.0971157	-0.123078	-0.00484374	-0.497151	2.58422	-0.554291	0.545652	3.10335	-0.108545	2.18637	-0.0854788	-0.63207	-2.70184	-0.112406	-0.19452	-3.07718	0.265305	-2.27367	-2.48423	2.46845
Embryonic Stem Cell;masitinib;trt_cp;3.33 uM;24 h	0.270699	0.5037	0.375029	0.352886	0.602139	0.0877284	0.187472	0.245637	0.465935	0.337778	0.0443696	-0.997567	-3.42691	-2.9625	-0.0599432	-2.6923	0.142136	-2.38965	0.0438112	-0.416775	0.121728	0.227296	-2.91657	-2.61639	-2.49457	-0.111854	0.208403	2.33805	-2.40078	0.751046	-2.17243	0.666597	-2.67342	0.0199172	-2.40074	2.91244	2.93412	-2.87519	0.66281	-0.10766	-3.84739	0.819001	-2.63952	-2.70876	-0.176364
Embryonic Stem Cell;KW-2449;trt_cp;3.33 uM;24 h	-0.0731005	0.362198	0.170875	0.26122	0.512361	-0.0566183	0.142274	0.197228	0.308016	0.043736	0.0109127	-3.36158	-3.70496	-3.28525	-0.108503	-2.84836	-0.161888	0.0169367	-0.500557	-0.858692	-0.284483	-0.0575585	-3.37822	-3.02168	-2.81332	-0.100368	0.448784	0.00212812	-2.28046	0.611253	-0.00465351	0.986485	-2.75532	-0.250821	-2.34444	3.03862	2.93465	-2.57286	2.71527	-0.149108	-3.99313	2.45992	-3.16644	-2.49904	-0.209512
Embryonic Stem Cell;SGI-1776;trt_cp;3.33 uM;24 h	0.056093	0.298981	0.210484	0.275242	0.504498	0.0118287	0.035661	-0.0611214	0.414874	0.133402	0.0207778	-3.37174	-3.54051	-3.29903	-0.207901	-2.76959	-0.172836	0.0896179	-0.46658	-0.721477	-3.01058	0.191619	-3.31811	-2.6552	-2.52545	-0.0142049	0.404411	-0.103717	-0.308441	0.43483	0.245023	1.00205	-2.94705	-0.286751	-2.56597	2.91774	0.720533	-2.71632	2.83427	-0.276013	-3.96246	1.00204	-2.85369	-2.86021	-0.0612681
Neural Progenitor Cell;tivozanib;trt_cp;3.33 uM;24 h	0.130743	0.193602	0.0572665	-2.19002	1.85979	-0.255961	0.333572	-2.38963	0.329519	0.279309	2.21262	0.298265	-3.03228	-2.75752	-0.086264	-1.82286	-0.0215615	-0.449166	-0.290675	-0.159477	0.495379	0.24698	0.609	-0.249037	-0.279709	-0.272438	0.117579	1.08773	-0.394488	1.12534	-0.331999	-0.162623	0.35572	-2.35806	-2.42247	-0.597607	-0.513779	0.168511	0.109505	2.32383	-3.82533	-0.265787	-3.05328	-2.97108	0.0422626
Neural Progenitor Cell;XMD-1499;trt_cp;3.33 uM;24 h	-0.0802711	0.103909	0.0651589	0.0462418	-0.165931	-0.256989	-0.154879	-0.0504722	-0.180583	0.274821	0.751082	0.66192	0.0343091	0.207132	3.0728	2.48958	-0.494594	-0.493897	2.0739	2.22027	0.712451	0.159115	0.372992	2.7621	-0.35057	0.27953	-0.354483	0.782435	-0.314905	0.599211	-0.195783	0.064952	3.02088	-0.135516	2.88112	-0.0276283	-0.558552	-2.75319	-0.689626	0.317228	0.370494	0.469341	0.263644	-0.0712727	3.00339
Neural Progenitor Cell;MC1568;trt_cp;3.33 uM;24 h	-1.05797	-0.0784102	-1.94997	-0.280483	-2.26953	-0.803406	-0.464884	-0.731899	-2.33384	-0.564246	2.82496	-0.181365	-0.052341	0.0815796	0.327386	0.314704	2.22437	0.428405	0.0102893	2.21846	0.695118	3.24501	-0.00455603	0.546852	0.377955	-0.316261	-0.430777	0.142557	-0.461065	2.66075	-0.412173	0.0791985	2.43269	-2.8689	0.00809634	0.252545	-0.255184	-2.17198	0.0626291	0.185562	-3.30448	-0.302894	-2.41299	-2.7394	2.55254
Neural Progenitor Cell;VX-745;trt_cp;3.33 uM;24 h	-0.488089	2.52262	-0.342621	0.0421213	0.692378	-2.45891	-0.26091	-0.640094	-1.62852	-0.0603507	0.339692	0.0418804	-2.35462	2.52439	2.40823	-0.192131	2.51157	0.711324	2.70546	2.62722	3.39441	3.54745	0.555615	2.6722	0.321651	-0.323002	-2.27682	0.174079	-0.574053	2.57597	-0.784922	-0.0241899	3.28407	0.0399857	2.06419	0.186725	-0.157471	-0.216969	0.11076	0.23084	-3.07727	-2.07132	-2.29597	-2.41653	-0.213835
Embryonic Stem Cell;FR-180204;trt_cp;3.33 uM;24 h	0.0452198	0.427833	0.165143	0.262253	0.626096	-0.0465724	0.219903	0.127597	0.453293	0.143288	0.0822722	-3.47307	-3.5334	-3.10309	-0.0552637	-2.66638	-0.13671	-2.62871	-0.209322	-0.628628	-0.032679	0.143027	-3.16399	-2.66288	-2.47275	-0.0678124	0.356663	2.61597	-2.45306	0.70957	-0.166165	0.7275	-2.7157	-0.091284	-2.38392	3.11819	3.12002	-2.71396	2.59432	-0.189317	-3.84665	0.825156	-2.62308	-2.73799	0.127959
Neural Progenitor Cell;HG-14-10-04;trt_cp;3.33 uM;24 h	2.81979	2.42838	2.59373	2.24105	3.30791	2.19764	2.80401	0.0528126	2.82377	2.27226	-0.0228653	2.30485	-2.89934	-0.74849	0.128256	-2.18998	0.138622	-0.258605	-0.0704156	2.28504	0.974979	-0.0103033	0.639387	0.0622782	0.349983	-0.143068	-0.0753214	1.46719	-0.423354	2.98206	-0.301093	0.203929	0.468476	2.14458	0.350695	0.327649	-0.0618527	0.268406	0.247629	2.31933	-3.20668	-0.20571	-2.96515	-0.520275	0.022822
Neural Progenitor Cell;BMS-777607;trt_cp;3.33 uM;24 h	-0.305698	-0.0584974	-0.280058	-0.278634	-0.226379	-0.0222621	-0.389111	-2.24488	-0.237715	0.157209	2.74195	0.374679	-0.38566	-0.527999	-0.066738	0.281869	-0.278785	-0.405828	-2.55685	-0.331289	0.406781	0.00378556	0.150987	-0.200884	-2.42103	-0.334674	-0.308694	0.848025	-0.531501	1.01475	-0.519595	0.108714	0.413273	-0.207535	-0.331859	-0.74428	-0.508367	-0.369238	-0.524364	2.39719	-3.52508	0.0297519	-2.56784	-2.62395	0.467204
Neural Progenitor Cell;SAR-245409;trt_cp;3.33 uM;24 h	2.16163	2.41001	0.720751	0.421881	0.448846	0.184006	0.746621	0.342126	0.675246	0.832582	0.28283	0.233421	0.0855206	-0.0755556	0.552941	0.27464	0.2175	-0.31608	-2.0683	2.02996	1.24574	0.514032	0.596407	0.572457	-0.395011	-0.135864	-0.105874	1.29711	-0.747869	0.958518	-0.654099	0.152439	1.23759	0.371947	0.236588	0.00884752	-0.415528	-0.0309968	-0.664159	2.70069	-0.970416	0.170376	-0.312138	-0.347781	0.968645
Embryonic Stem Cell;dacomitinib;trt_cp;3.33 uM;24 h	-0.0054739	0.453122	0.0737024	0.210337	0.462803	-0.131476	0.0769779	0.195194	0.352742	0.0475628	-0.0281177	-3.31051	-3.71659	-3.27387	-0.193863	-2.7279	-0.00558347	-2.5809	-0.422834	-0.568251	-0.254549	0.0852836	-3.26791	-2.84926	-2.33756	0.0356634	0.424608	-0.0447767	-0.391355	0.605441	-2.1339	0.803917	-2.52156	-0.139439	-2.17021	3.00782	2.91829	-2.93194	2.38494	-0.0971095	-3.84129	2.37951	-2.42864	-2.72939	-0.219941
Neural Progenitor Cell;daminozide;trt_cp;3.33 uM;24 h	-2.45283	-0.159026	-0.139469	-2.54844	-2.84718	-2.21443	-2.3213	-2.24262	-2.25577	-0.12233	0.444721	0.319641	0.0521836	0.172013	0.138336	-0.00905567	-0.300075	-0.0778686	-0.000859668	-2.36408	0.434113	0.403778	0.062992	0.373994	-1.9531	-0.207089	-0.296199	0.556013	-0.44114	2.54614	-0.483974	0.416355	2.99453	-0.37131	0.240218	-0.000589544	-0.255624	0.169431	-0.455207	2.18656	-2.63523	0.49002	-0.139109	0.430869	2.819
Epithelial Cell;levobunolol;trt_cp;3.33 uM;24 h	-2.27711	-0.118758	-2.38976	-2.03676	-0.541877	-0.192285	-2.10802	0.380605	-2.53377	-2.46589	0.504567	-0.119508	0.685151	0.161679	1.1344	3.2483	-0.405555	0.230306	2.24016	0.387496	-0.123678	-0.3784	3.62927	-0.438616	0.232912	-0.0495577	0.319749	-0.00911989	3.12247	0.333045	0.474835	-2.47024	0.932085	-2.9562	-2.50223	-2.97399	-0.863905	-0.126578	-2.9641	0.767891	0.595817	-2.50527	0.627473	0.125262	-3.1614
Embryonic Stem Cell;BMS-777607;trt_cp;3.33 uM;24 h	0.111881	0.505393	0.28469	2.44278	2.79735	-0.0760109	0.123386	0.23699	0.594358	0.199602	0.349951	-3.44679	-3.48527	-3.14892	-0.100171	-2.69042	-0.092482	0.23608	-0.430068	-0.647323	-2.74748	0.262605	-3.24825	-2.973	-0.397905	-0.231119	0.250352	-0.0770175	-0.264396	0.654661	-0.0497203	0.760001	-2.73094	-0.326087	-2.47065	0.64942	3.07524	-2.27726	2.7321	0.0146701	-4.13033	0.698981	-2.94897	-2.79861	-0.0668569
Neural Progenitor Cell;KU-55933;trt_cp;3.33 uM;24 h	-0.41045	2.13024	1.89839	-0.266317	-0.284115	-2.22158	-0.682414	-0.687368	-2.12639	0.52684	0.342308	0.0259484	2.7369	2.92222	0.304152	-0.0341657	2.46832	0.799197	0.654179	2.6033	3.55636	3.75305	2.50162	2.80816	0.188485	0.0236777	-2.30456	0.107474	-0.6368	2.47494	-0.391411	0.117584	3.21352	0.313284	2.06182	0.114773	-0.169959	-2.32008	-0.310881	0.373952	-2.6268	-0.253806	-2.28831	-0.322861	0.0985524
Neural Progenitor Cell;JW-55;trt_cp;3.33 uM;24 h	-0.539389	2.38235	0.474435	2.02514	0.328098	-1.93791	-0.289116	-0.739925	0.134709	0.563824	0.519489	-0.123622	-2.58621	0.383875	2.39787	-0.597109	2.59082	0.645009	2.48253	2.65405	1.04858	3.23628	2.47471	0.619964	0.123253	-0.558272	-2.15465	0.238886	-0.845688	2.45741	-0.441055	0.0749329	2.56935	0.303163	-0.205998	0.494915	-0.0281455	-0.180274	-0.151121	0.21955	-3.21385	0.103805	-2.37115	-2.82794	-0.325638
Embryonic Stem Cell;BS-181;trt_cp;3.33 uM;24 h	-0.108446	0.263879	-0.00290889	0.00788773	0.438869	-0.112842	-0.0174883	0.0763776	0.44063	0.0420537	-0.0770683	-3.60901	-3.56526	-3.26739	-0.306403	-2.66203	-0.42392	-2.7393	-0.450792	-3.09683	-0.467079	-0.0463058	-3.40427	-2.64385	-2.58452	0.225715	0.625923	2.71968	-0.444515	3.00047	-2.16893	1.06167	-2.9478	-0.516802	-0.0843006	3.23969	3.36699	-0.628372	2.82887	2.29079	-3.7759	0.909399	-2.52472	-2.61187	2.5944
Embryonic Stem Cell;PF-04217903;trt_cp;3.33 uM;24 h	0.151576	0.457059	0.315357	0.352746	0.669299	0.0970033	0.196235	0.0382309	0.548855	0.248135	0.239283	-3.3459	-3.48297	-3.12184	-0.0333236	-0.518498	-0.0216051	-2.67698	-0.208793	-0.672364	-2.76728	0.167857	-3.13668	-2.93822	-0.137281	0.133979	0.336526	0.103531	-2.49352	0.542723	-0.0744275	0.824972	-2.86979	-0.107306	-2.24739	3.18658	3.09004	-2.52241	2.46409	-0.136163	-3.91903	2.35027	-2.55493	-2.76683	-0.112001
Neural Progenitor Cell;Y-27632;trt_cp;3.33 uM;24 h	-0.251998	2.25389	1.80639	-0.0549894	-0.0679508	-1.99794	-0.258591	-0.401329	-1.57699	1.9476	0.783985	0.0197256	0.2227	2.53734	2.51162	-0.0699303	2.56712	0.470869	0.0865855	0.301717	3.32154	3.39125	2.85061	2.47082	-0.140159	-0.0809993	-2.50001	0.374808	-0.664591	2.54782	-0.458602	-0.269449	3.32282	0.118522	2.1287	0.0856285	-0.460389	-0.54895	-0.452604	0.196104	-3.01142	0.268951	-2.15495	-2.7053	-0.233427
Neural Progenitor Cell;anacardic-acid;trt_cp;3.33 uM;24 h	-0.465342	2.3084	1.79882	2.16023	0.111478	-1.91317	1.88641	-0.727827	0.161806	0.344902	2.55104	0.262507	0.0234694	0.30472	-0.0309186	-1.93709	2.70999	0.272319	0.0931176	2.55294	1.05442	3.24199	0.32337	2.74882	1.92713	-0.484319	-2.537	0.300877	-0.476136	2.72546	-0.52344	0.0834361	3.24326	-0.0520385	1.90472	-0.189169	-0.572403	-2.34359	-0.38727	-0.0706563	-2.8886	-0.0870875	-2.43887	-2.36834	2.46411
Neural Progenitor Cell;azacitidine;trt_cp;3.33 uM;24 h	-2.14515	1.99911	0.205635	-0.00523179	-2.43171	-0.233755	-0.0811411	-0.493118	-2.22882	0.184389	0.152898	0.355113	0.0507296	-0.0359727	0.276162	0.193469	1.9077	-0.11482	-0.23181	0.459324	3.13206	2.9877	0.052434	2.81284	-0.320373	0.295287	-0.246976	0.353969	-0.92675	2.69223	-0.685909	0.220758	3.27604	0.175132	0.696253	0.0599836	-0.0139556	-0.443086	-0.633881	2.37677	-0.155209	2.43012	0.548094	0.0471053	2.71245
Embryonic Stem Cell;BIX-02189;trt_cp;3.33 uM;24 h	-0.0505558	0.294929	0.077019	0.22368	0.391406	-0.279074	-0.0670084	0.314512	0.29358	-0.100596	0.238229	-3.38832	-3.68266	-3.30692	-0.0443463	-2.68921	-0.153721	-0.0135786	-0.332937	-0.565831	-2.86353	0.271441	-3.26005	-2.81357	-0.128318	-0.0475449	0.230525	-0.0486312	-0.252782	0.463323	-2.16599	0.765753	-2.59622	-0.266003	-2.25598	3.13635	3.12257	-2.78797	2.52226	-0.119537	-4.08184	2.28312	-2.47781	-2.89858	-0.13794
Embryonic Stem Cell;cabozantinib;trt_cp;3.33 uM;24 h	0.31015	0.58072	0.407662	0.398239	3.03905	0.326472	0.440027	0.0329428	0.655642	0.450915	0.213637	-3.49313	-3.29312	-2.80185	2.74455	-0.526938	0.183378	0.195114	0.0488013	-2.81608	0.333174	0.492109	-2.83732	-2.51585	-0.109582	-0.0339535	0.165829	2.58064	-2.41295	0.481097	-0.214386	0.628598	-2.80284	-0.0239208	-2.39507	3.09747	3.16786	-2.72019	2.79114	0.0436393	-4.05187	2.26757	-2.72915	-2.81957	-0.210486
Neural Progenitor Cell;UNC-1215;trt_cp;3.33 uM;24 h	-0.532956	0.221447	-2.14358	-0.194176	-2.00991	-2.40282	-0.564611	-0.428939	-2.24271	0.171013	2.67179	-0.250171	-0.00955429	0.118082	0.141529	-0.0497312	2.3739	0.302858	0.0739141	-1.9925	3.07607	3.23822	-0.0669842	2.61883	-0.110291	-0.0632704	-2.3776	0.296878	-0.507724	2.26165	-0.243095	0.395775	2.9353	-0.398353	2.81008	0.139418	0.220027	0.0546363	0.256995	2.38746	-2.2977	0.118566	1.96697	0.0226427	3.04878
Neural Progenitor Cell;A-769662;trt_cp;3.33 uM;24 h	-0.0785952	2.38676	1.90685	2.4417	0.648034	-1.80361	0.000701117	-0.880402	1.61574	2.20173	0.190749	0.476001	2.30139	2.66705	2.49132	-0.102393	2.45149	0.171595	2.86624	2.72486	3.57178	3.20195	0.810124	2.91546	0.572586	-0.453682	-2.57691	0.327621	-0.55853	2.53365	-0.361107	-0.0428625	2.8251	0.338877	2.44885	0.344556	-0.177353	0.173644	0.259492	2.63359	-2.51298	-2.26259	-2.19678	-2.16344	2.43293
Neural Progenitor Cell;bosutinib;trt_cp;3.33 uM;24 h	3.0152	2.97994	3.1874	3.1805	3.26332	2.54357	3.01129	2.40125	3.10137	2.7293	0.446012	0.729003	3.32772	2.36734	3.06579	0.170011	3.01831	0.0577869	2.91193	3.22828	3.75989	0.184241	0.239153	3.37096	2.75587	-0.338452	-2.39503	0.657438	-0.529977	2.76123	-0.637682	-2.7059	3.06537	0.969609	-0.160367	0.0516567	-0.260065	-0.612988	-0.124288	2.82949	-0.276266	-2.51771	0.719662	-0.35555	3.14112
Embryonic Stem Cell;KIN001-266;trt_cp;3.33 uM;24 h	0.157524	0.395586	0.209607	2.37936	0.647614	0.00101991	0.175875	0.265317	0.428004	0.169161	0.130189	-3.47174	-3.50158	-3.20225	-0.0336976	-2.74601	-0.0575176	0.119178	-2.35512	-0.49867	-2.63921	0.183506	-3.17152	-2.58973	-0.174767	-0.21846	0.106872	-0.054316	-2.30716	0.318193	-2.27416	0.701088	-2.76448	-0.322103	-2.38151	3.18222	2.99095	-2.63414	2.54665	-0.193126	-4.02122	0.806656	-2.44124	-2.85755	-0.139884
Neural Progenitor Cell;VE-821;trt_cp;3.33 uM;24 h	-2.46663	-0.223726	-0.288981	-2.4929	-0.480277	-2.52288	-2.26396	-0.347587	-0.589127	-0.114358	-0.0217071	0.126958	-0.353433	-0.186517	-0.198713	-2.05243	0.0272044	0.201738	0.481411	-0.0526489	1.02811	3.0531	0.283341	2.68432	-0.338815	0.271851	0.238914	0.828314	-0.733279	2.3593	-0.657144	0.422483	2.98836	0.169074	0.523187	0.481969	0.260197	-0.106603	-0.253282	0.642364	-0.232812	2.98997	0.491109	0.224492	2.90036
Neural Progenitor Cell;GW-5074;trt_cp;3.33 uM;24 h	0.141357	0.679107	0.283267	0.284789	0.0570759	-0.30903	0.364573	-2.21146	0.24851	0.341001	0.149085	-0.110615	-0.110203	-0.0782583	0.310207	0.0960429	0.0863066	-0.227101	0.566388	0.0235879	1.16332	0.508647	0.689664	0.326156	-0.701487	0.14397	0.255408	0.87561	-0.347472	2.87516	-0.533124	0.548722	3.46366	0.0327651	0.515875	0.0950378	-0.620213	0.0601165	0.150797	0.246184	-0.421373	0.497113	-0.436072	0.499304	2.62732
Neural Progenitor Cell;JNJ-38877605;trt_cp;3.33 uM;24 h	-0.624068	2.25161	-0.607964	-0.253191	-0.0293899	-2.19906	-0.378453	-0.555491	-1.95038	-0.406316	0.701785	0.14705	0.273002	2.47807	2.63017	0.0280572	2.5986	0.259821	0.478186	2.80694	3.20833	3.56376	0.577344	2.86931	0.115456	-0.291335	-2.67237	-0.0375728	-0.575121	2.47949	-0.246994	-0.263756	2.6472	-0.0755905	2.09137	-0.247278	-0.234227	-0.336141	-0.292984	0.175499	-2.91952	-1.9035	-2.22245	-2.54662	-0.496084
Embryonic Stem Cell;SAR-245409;trt_cp;3.33 uM;24 h	0.172142	0.512787	0.332842	0.249153	0.713988	0.0616798	0.185488	0.201077	0.51972	0.233045	0.170785	-3.50108	-3.4463	-3.11859	0.095067	-2.69908	0.0644099	-2.43591	0.0645111	-0.438358	0.0904443	0.550383	-3.07088	-2.56566	-0.166109	0.0187399	0.39979	2.51564	-0.40567	2.94444	0.0165795	0.855797	-2.65474	-0.144992	-2.46863	3.04537	3.07015	-2.69997	2.62225	0.0824746	-4.09887	0.81317	-2.91987	-2.91831	-0.00551718
Neural Progenitor Cell;UNC-0638;trt_cp;3.33 uM;24 h	-0.0961697	2.49036	2.36773	-0.0496041	1.92564	-0.425815	-0.0833063	-0.0685976	-0.182471	-0.153808	2.82139	-0.0584385	0.336805	2.70108	2.55642	-2.08977	2.90714	0.524188	0.170936	0.453394	3.3355	3.40877	-0.040315	2.60956	0.141534	-0.0779126	-3.01936	-0.169795	-0.413778	2.48043	-0.592972	-0.0620665	3.08656	0.105128	-0.0237269	-0.0928541	-0.512413	-2.67461	0.148081	0.0225965	-3.13036	-2.65571	-0.31767	-2.82577	2.42547
Embryonic Stem Cell;sunitinib;trt_cp;3.33 uM;24 h	0.0623507	0.435531	0.194059	0.271479	2.81694	0.0782668	0.192247	0.162539	0.476805	0.192276	2.38974	-3.40086	-3.49462	-3.05932	0.146504	-0.618412	0.0930294	0.147583	-0.0857435	-0.43481	0.0951076	0.437376	-3.22127	-2.52162	-0.201878	-0.165209	0.443757	2.45581	-2.41838	2.88596	0.0987219	0.889815	-2.63841	-0.0166339	-2.39722	3.0657	2.98339	-2.63167	2.61601	0.0114231	-4.08531	2.20165	-3.00407	-2.88402	-0.398459
Neural Progenitor Cell;alectinib;trt_cp;3.33 uM;24 h	-0.918033	-0.325966	-1.86234	-0.271803	-2.38798	-0.782134	-0.411653	-0.72436	-2.42537	-0.384048	0.345032	0.1871	0.477783	2.67835	2.24322	-0.0569476	2.11526	0.535652	0.326875	0.448615	3.37026	3.55023	2.55148	2.65049	0.334366	-0.290743	-2.24939	-0.00464856	-0.469042	2.26311	-0.454885	0.0819821	3.08312	-0.299918	2.48882	0.0769374	-0.100023	2.08153	-0.38605	2.07696	-2.33416	-0.217452	0.0902965	0.243991	2.29079
HSC;calcitriol;trt_cp;3.33 uM;6 h	0.422245	-2.43444	0.509327	-2.67465	0.272444	-0.0562318	-0.464345	-0.01669	-0.198902	0.376372	-0.431209	0.562841	-3.63275	-0.918583	-2.94893	-3.55118	0.393282	0.120135	-4.23162	-3.38041	-3.54602	-3.39097	-3.88287	-0.145656	-2.69366	-0.814659	-2.9129	-1.20512	0.362124	-2.51612	0.0763683	-0.710099	-1.0332	2.50756	0.220358	-0.220751	0.128978	-0.735826	-2.71915	-1.11008	0.172636	2.81802	-0.429584	-0.368169	0.270508
Neural Progenitor Cell;BI-2536;trt_cp;3.33 uM;24 h	-0.531527	0.495265	-0.366241	0.0975536	-0.383613	-0.787931	0.10011	-0.905766	-0.0621745	-0.197338	2.8916	2.65783	-0.395288	0.00172186	0.125203	0.125628	2.03579	0.115713	0.280233	-0.0198372	0.94098	3.09	0.899086	0.151461	0.0640356	-0.34889	-2.51883	0.933707	-0.540472	1.05673	-0.530743	-0.369493	2.53163	-2.56203	2.25275	-0.277888	-0.750467	2.63625	-0.023019	2.4527	-3.17099	-0.16758	-3.01587	-2.64832	0.17871
Neural Progenitor Cell;AZD-1480;trt_cp;3.33 uM;24 h	-1.94403	2.25292	-1.90754	1.98792	-0.748092	-2.14382	-0.261537	-2.3566	-1.68319	-0.328702	2.82621	0.403697	-0.392798	0.200993	0.0784887	-0.14952	-0.247103	0.11414	-2.35323	-0.446241	0.69279	2.64461	0.625939	0.149333	0.211592	-0.515458	-0.519409	0.933932	-0.788659	2.44922	-0.378609	-0.209936	3.23944	-0.26298	2.49119	-0.32965	-0.539613	2.57463	0.208461	-0.0976259	-2.67623	-0.0391352	-2.77155	0.0385475	2.30134
Neural Progenitor Cell;methylstat;trt_cp;3.33 uM;24 h	-0.260581	2.26038	0.40589	2.33501	0.261531	-1.96387	2.35697	-0.703687	1.87811	1.80652	2.82888	-0.101293	-0.240682	0.0361855	0.128659	-1.90287	2.51411	0.0377175	2.40335	2.35352	0.981417	3.17098	0.321375	0.537069	-0.163868	0.176927	-0.209698	0.666293	-0.539017	2.47495	-0.531026	0.190016	2.7365	-0.0874101	2.44802	0.437308	-0.0705265	0.166701	-0.101191	2.31327	-0.408836	0.745892	-0.0535001	-0.286749	2.42547
Neural Progenitor Cell;WZ-4002;trt_cp;3.33 uM;24 h	0.567664	2.19049	0.584859	0.165917	2.2837	-0.0286359	0.52523	-2.21957	0.559333	0.319206	-2.27019	-0.0619881	-3.16454	-2.90839	-0.434537	-2.09624	0.155805	0.0616182	0.42677	0.357891	0.771194	0.743878	0.801767	0.438694	-1.98543	-0.273926	0.290624	1.01875	-0.513297	3.15765	-2.4209	0.128178	0.513071	0.0678867	-2.59671	-0.235117	-0.242488	-0.0532536	-0.359903	2.36764	-4.24674	0.143278	-2.90326	-3.13856	-0.364021
Neural Progenitor Cell;masitinib;trt_cp;3.33 uM;24 h	2.31478	2.37552	2.06436	-0.0568093	1.63269	0.175786	1.89341	-0.439085	0.488462	0.397588	0.396724	0.607324	-0.119225	-2.22567	0.192447	0.0149055	0.186606	-0.165373	0.0205008	2.39234	0.911649	2.80327	0.290847	2.67014	0.371067	-0.34237	-0.553221	0.720791	-0.526604	2.64938	-0.676667	0.150172	0.613471	-0.538226	-0.216614	-0.826193	-0.667222	-2.53843	-2.77699	2.61563	-3.67586	-2.74576	-0.129835	-3.05712	0.621027
Embryonic Stem Cell;BRD-K68336408;trt_cp;3.33 uM;24 h	0.24009	0.628549	0.432348	0.372365	0.681366	0.137501	0.334852	0.243103	0.508752	0.267771	0.275859	-3.22261	-3.38713	-2.93375	0.170029	-2.62816	-0.0729546	0.0370151	-0.0233236	-0.413445	0.112409	0.56744	-3.12139	-2.4985	-0.271427	-0.0507181	0.36825	2.42553	-0.434448	0.448525	0.042979	0.806881	-2.70265	-0.00278977	-2.36523	2.81915	2.72383	-2.63285	2.52923	-0.150873	-4.08803	0.806428	-2.78065	-2.88024	-0.232549
Neural Progenitor Cell;NU-7026;trt_cp;3.33 uM;24 h	-2.23794	1.99081	-0.131744	-2.24241	-2.2156	-2.20887	-1.98527	-2.39698	-0.160306	0.169959	2.44621	0.187955	-0.603161	-0.353837	-0.26956	-2.31069	-0.0840949	0.1437	-0.00211011	-2.50012	0.627501	0.293655	-0.014777	0.0838125	-0.492445	-0.208247	-0.30784	0.716376	-0.737	2.81532	-0.6072	0.401449	2.91863	-2.32462	2.61407	0.295169	-0.204713	0.7048	0.161768	2.6217	-0.37973	0.664734	-2.6864	0.208085	2.71906
Embryonic Stem Cell;AZD-4547;trt_cp;3.33 uM;24 h	-2.45907	-0.510625	-2.2366	-0.186441	2.00574	-2.30994	-0.513714	-0.143779	-0.0712187	-2.31501	2.3638	-3.18388	-3.47924	-2.81146	-0.129944	-2.81594	-0.0233914	0.145429	-0.386391	-0.380343	-2.74884	2.35701	-3.15751	-2.60896	-0.0216899	-0.00810518	0.24562	-0.244647	-0.232412	2.91135	-0.229848	0.669055	-2.81711	-0.517709	0.0258551	0.574329	3.31366	-0.363925	2.76542	2.6511	-3.65176	0.819568	-2.98707	-3.17846	-0.210016
Endothelial Cell;KIN001-269;trt_cp;3.33 uM;24 h	0.591698	0.748706	0.554194	0.287212	0.503485	1.11906	0.843796	2.32012	0.315285	1.06272	0.0794068	3.9358	3.71216	0.932976	0.47091	-0.282133	1.1607	0.00500816	2.84896	0.544223	3.98994	2.3585	3.8808	2.38902	3.2723	1.52255	-0.401774	3.93101	-0.522337	2.93004	0.556992	-1.10916	1.69249	-0.277221	0.544952	1.09657	0.988569	3.40749	0.174107	4.10059	0.572118	-0.276721	0.0548851	0.739726	2.78584
Embryonic Stem Cell;AT-7867;trt_cp;3.33 uM;24 h	-0.154502	0.0989748	-0.0486902	0.162834	0.404778	0.0103058	-0.16611	2.33451	0.36177	0.0919045	-0.337406	-3.18051	-3.69805	-3.41309	-0.343779	-2.96505	-0.166803	-2.51299	-2.72841	-0.88848	-0.596961	-0.58369	-3.39351	-0.790757	-2.6892	-0.0799099	0.542222	0.2264	-2.309	0.673333	-2.26335	1.24315	-2.66984	0.0312175	-2.23009	2.75146	2.91264	-2.95331	2.71115	-2.26257	-3.53548	1.0507	-2.56211	-2.46589	0.229218
Embryonic Stem Cell;HG-9-91-01;trt_cp;3.33 uM;24 h	-0.271122	0.129157	-0.0936969	0.1758	0.453096	-2.42506	-0.0143122	-0.0522409	0.280518	-2.3834	0.0367357	-3.67158	-3.53756	-3.18473	-0.0954297	-2.89677	-0.27315	0.292032	-0.62658	-0.75673	-0.258136	0.266427	-3.3633	-1.14997	-0.413126	-0.14668	0.410922	-0.278543	-2.13319	0.731621	-0.0405998	0.975807	-2.9155	-0.339683	-2.47061	3.16775	3.14959	-0.268738	2.89084	-0.0573875	-4.13505	0.799955	-3.28368	-2.83818	-0.146799
Kidney Cell;oxiconazole;trt_cp;3.33 uM;24 h	-0.515675	-0.331559	-0.633721	-0.00175019	-0.0410425	-0.194887	0.0225065	0.315724	-0.416685	-0.591504	0.0539056	0.797416	0.673706	-0.0632768	2.81667	-0.0519197	-0.00639944	-0.203671	-0.354615	-2.45631	-0.0956791	0.614983	2.53199	-0.594659	0.458618	-0.542376	-2.60084	3.19654	3.37459	2.667	-0.0871982	-2.44647	0.053656	-3.03066	-0.169497	2.59675	-0.460265	2.91652	0.60285	3.09179	-0.245337	-2.43401	-0.390972	0.336857	-0.449421
Embryonic Stem Cell;WZ-4002;trt_cp;3.33 uM;24 h	0.00110804	0.514884	0.125161	0.371106	0.647119	-0.205727	0.137902	0.279434	0.406152	0.0501711	0.0325524	-3.55428	-3.74637	-3.43797	-0.0725339	-2.85573	-0.123441	-0.220056	-0.0403301	-0.62746	-0.0258678	0.120706	-3.28304	-0.833292	-0.0180383	-0.0458744	0.463615	2.35083	-2.33815	0.712754	-0.11287	0.781742	-2.6072	0.0816568	0.0141982	3.38112	3.22316	-2.7837	0.868422	2.43561	-3.59695	1.07433	-2.28741	-2.69673	0.0482158
Endothelial Cell;tivozanib;trt_cp;3.33 uM;24 h	0.0391617	-0.109935	-0.126024	-0.153228	0.269517	0.437108	-0.0612988	0.6602	0.140942	0.222754	0.640218	4.33644	0.936455	0.702063	2.61643	-0.0182994	0.568785	-0.15284	0.137197	0.173626	4.06528	2.32046	2.77645	2.68835	3.02247	0.703884	-0.528754	0.930415	-3.23101	2.38031	2.33422	-1.38788	1.58567	2.45152	0.500057	0.53586	0.749299	2.93138	-2.49589	3.40457	0.239402	-0.262333	0.383979	-0.0423457	2.54287
Epithelial Cell;senicapoc;trt_cp;3.33 uM;24 h	-2.28956	0.273856	-0.210477	2.52226	2.50232	0.26348	-1.66207	0.0205874	-1.57479	-0.407112	0.428416	-0.256338	0.0823298	-2.17712	2.97918	2.85945	0.052796	0.153268	0.360779	-0.0434707	-2.90129	-0.0953783	3.04174	0.597198	2.31873	-0.201214	-0.124681	-2.73859	2.2916	2.50373	0.825845	-0.320823	0.79753	-2.91633	2.3871	-0.651988	-2.92451	-2.30642	2.3599	-0.530016	2.89102	-2.94247	0.404966	0.0906697	-3.68095
Embryonic Stem Cell;quizartinib;trt_cp;3.33 uM;24 h	0.331773	0.780471	0.500623	2.68699	3.0051	0.209693	0.35485	0.382247	0.708958	0.439583	0.0830291	-3.52067	-3.42722	-3.08193	-0.00655025	-2.8019	0.135517	0.256176	-0.279553	-0.655445	0.108964	0.252031	-3.19494	-0.883038	-2.24051	0.045271	0.370145	2.49054	-2.42417	0.695484	0.0984212	0.764106	-2.66391	2.46931	-2.35127	3.1774	3.06588	-2.60065	0.823945	-0.0121421	-3.87769	2.35751	-2.7022	-2.89178	0.0730578
Embryonic Stem Cell;OSI-930;trt_cp;3.33 uM;24 h	0.242429	0.48735	0.260374	0.285519	0.667967	0.015924	0.140635	2.4063	0.45697	0.259013	0.325563	-3.26428	-3.49983	-3.07523	2.67903	-0.743464	0.201954	0.0273634	0.152174	-0.340398	0.0101561	0.405471	-3.18026	-2.75397	-0.0592679	-0.104287	0.242558	2.50527	-2.33051	0.618709	-0.0799982	0.607626	-2.59695	-0.0426818	-2.15137	3.08487	2.90444	-2.89279	2.55363	0.0308389	-3.91032	2.25952	-0.992805	-2.91826	-0.240851
Neural Progenitor Cell;SGI-1776;trt_cp;3.33 uM;24 h	2.53603	2.48009	2.4556	-0.118918	2.9	2.15877	2.65031	2.04627	2.54497	2.37728	0.128183	0.159261	0.0073329	-2.64926	0.586009	-0.183829	0.727803	-0.123279	0.118609	2.40745	1.49109	2.90278	0.583895	0.613504	2.52148	-0.174641	-0.216435	1.759	-0.861993	2.59956	-2.37265	0.0767692	0.810348	0.300158	0.15814	0.334461	-0.101209	0.150148	0.295458	2.80558	-1.04299	-0.110243	-0.219583	-0.440529	0.826366
Embryonic Stem Cell;rebastinib;trt_cp;3.33 uM;24 h	0.0740675	0.364845	0.239348	2.23276	2.74018	0.0806268	0.16232	0.0652874	2.34133	2.04758	2.49136	-3.33664	-3.48759	-2.74896	-0.00121023	-2.82131	0.12055	0.288948	-0.188985	-0.422082	0.0407775	2.68123	-3.26202	-2.41574	0.0460672	-0.0926053	0.443561	0.00321409	-2.46163	2.9345	-0.0825534	0.693309	-2.87017	-0.106874	-2.50985	0.538042	3.35349	-0.31584	2.82703	2.32684	-3.95207	0.240129	-3.47168	-3.03018	-2.26908
Neural Progenitor Cell;niclosamide;trt_cp;3.33 uM;6 h	-0.807123	-0.506709	-0.606477	-0.461381	-0.44485	-0.365712	-0.0792293	2.76312	-0.822907	-0.667363	0.725042	3.50189	0.675111	0.336648	1.08549	2.60155	-2.69294	-0.73776	2.51576	0.247884	-0.0292295	-2.65614	-0.39736	0.0435977	2.67936	0.360161	0.179336	0.378952	0.497488	0.500467	-0.0768811	0.303453	1.598	-3.44932	0.610518	0.137396	0.452778	-0.775644	-3.1049	0.527955	0.553247	-0.539728	3.15703	-0.316499	1.01071
Embryonic Stem Cell;TPCA-1;trt_cp;3.33 uM;24 h	-0.224062	0.143921	-0.0853328	-0.00839135	0.285846	-0.241027	-0.208517	0.110693	0.0921152	-0.067122	0.2147	-3.28336	-3.39958	-3.04817	0.0351106	-0.472837	0.0622245	-2.42882	-2.7011	-2.9344	-0.130928	0.103996	-3.22888	-1.2435	-2.69225	-0.150056	0.286847	2.53743	-2.50251	0.648476	-2.15275	0.839543	-2.73055	-0.0915338	-2.14545	2.98242	2.97408	-2.78101	2.25298	-0.197786	-3.79457	2.29975	-2.63844	-2.57999	-0.128561
Epithelial Cell;BRD-K00848147;trt_cp;3.33 uM;24 h	2.67641	2.74262	2.59964	0.604608	2.94078	2.36734	2.52691	2.84326	2.74723	2.91076	-0.2697	-2.8014	2.64845	-2.26421	-2.23508	0.193112	1.87369	-1.02621	2.87443	-2.53556	3.56272	2.69229	0.173452	0.30995	2.63678	2.23105	1.62472	1.33774	-0.0702762	0.0765154	-2.39912	-1.986	3.32728	-2.32037	3.16633	0.429909	-0.06697	-0.243649	2.56326	0.69911	3.13354	0.161826	2.95252	0.115623	3.47816
Embryonic Stem Cell;ALW-II-49-7;trt_cp;3.33 uM;24 h	-0.037803	0.24287	-0.0166177	0.052198	0.367826	-2.45129	-0.0820426	0.311969	0.262737	-0.141829	0.258706	-3.39402	-3.52713	-3.264	-0.0575504	-2.67199	-0.20215	0.0963736	-0.218129	-0.585849	-3.2004	0.308016	-3.54581	-2.83513	-0.0421925	-0.108968	0.215198	-0.352962	-0.272436	0.5813	-2.19608	0.748834	-2.56025	-0.471958	-2.12343	3.04429	3.07365	-2.72172	2.75948	0.113982	-3.95865	0.974149	-2.3765	-2.74251	0.0714855
Epithelial Cell;selegiline;trt_cp;3.33 uM;24 h	-3.11917	-0.214925	-0.876834	2.43547	-0.202209	-0.387591	-0.340931	0.192558	-3.10229	-1.05032	-0.0611243	-0.729664	-0.835563	-0.783192	-0.443898	2.6693	-2.75351	2.81792	-0.139098	0.363747	-3.38792	-0.0393665	2.62382	-2.7189	-2.1252	-0.568634	-0.0317571	-3.14522	0.311254	1.95246	2.24226	0.779834	2.2003	-2.81434	-0.360171	-3.80835	-3.35551	-0.303362	0.233207	-3.25276	-2.41641	-3.10924	-2.85757	2.6482	-3.57356
Epithelial Cell;clofoctol;trt_cp;3.33 uM;24 h	-3.12878	-2.77447	-2.54168	0.133312	-1.91653	-3.17332	-2.77159	-3.28056	-2.50805	-2.94539	-0.16204	0.036574	-2.77263	2.46732	0.34966	-0.572011	1.93734	0.842216	-0.595262	-0.78588	-3.25511	-3.21111	-0.530296	2.0156	-0.549248	-2.0278	-0.106514	-1.21146	-0.624999	2.52307	-0.181381	-0.0442746	-1.06778	2.90207	-0.0952364	-0.0743589	0.523094	-0.371364	2.74352	-0.73866	-0.384641	0.393517	-0.356932	-0.224199	-0.427466
Embryonic Stem Cell;bosutinib;trt_cp;3.33 uM;24 h	0.0557192	0.476985	0.192709	0.257366	0.502854	-0.0884579	0.114873	0.0771439	0.352699	0.167354	0.0739518	-1.03449	-3.58341	-3.24504	-0.0610404	-2.56369	0.0547203	-2.51265	-0.127077	-0.457713	-0.00863141	0.236335	-3.13687	-2.77828	-2.34083	-0.0770287	0.42412	2.41501	-2.40729	0.678983	-2.12308	0.811201	-2.4834	-0.13363	-2.20199	3.17916	3.10663	-2.66332	2.49794	-0.0863433	-3.73982	2.23839	-2.62104	-2.50112	0.0032202
Endothelial Cell;JNK-IN-5A;trt_cp;3.33 uM;24 h	-0.151662	0.142203	-0.411389	2.1221	2.24727	-0.0900972	0.3751	-0.0531142	0.427336	-2.26622	-2.80831	-2.95228	2.4142	-2.51969	-0.0660914	-0.508025	-0.334872	3.06624	0.350429	-2.51148	0.627583	-0.458502	0.283788	0.157328	3.31457	-0.477823	0.462847	3.63386	2.21618	2.66137	2.33685	-2.34469	0.664979	2.04161	0.366354	3.38612	0.962119	0.672012	2.87505	0.685776	0.410992	-0.19567	0.161565	0.791922	0.498208
Embryonic Stem Cell;BMS-509744;trt_cp;3.33 uM;24 h	-0.0821003	0.385103	0.113883	0.390805	0.641817	-0.228575	0.0905882	0.188128	0.485181	0.120643	-0.160036	-3.68479	-3.60074	-3.34674	-0.362657	-2.78761	-0.188787	-0.434498	-0.331268	-0.825502	-0.164186	0.244275	-3.27635	-0.910492	-2.51161	-0.0506681	0.543266	0.024712	-2.3686	0.695312	-2.28878	0.938697	-2.77086	-0.236525	-2.15854	3.22412	3.3144	-0.626038	2.88993	-0.00247044	-3.76187	0.803646	-2.52681	-2.60842	0.0389944
Neural Progenitor Cell;KU-55933;trt_cp;10 uM;24 h	-0.696587	-0.100249	-0.841543	-0.595266	-1.96089	-0.702541	-0.373909	-0.6616	-0.357522	-0.575745	2.78806	0.0808885	-0.319667	-0.211138	0.33197	2.07903	2.41417	0.230828	2.24143	2.72374	1.04876	3.4263	0.825938	2.30019	0.121859	-0.00448181	-0.397687	1.08493	-0.224106	1.15457	-0.530679	-0.171581	0.702804	-0.225092	0.434533	-0.196933	-0.143172	0.219197	0.07599	3.08636	-3.17244	0.439234	-2.23088	-2.74087	0.477286
Neural Progenitor Cell;CTB;trt_cp;10 uM;24 h	0.451691	2.87191	2.63446	2.40072	2.28636	1.81163	-0.00780035	-0.687501	2.36581	2.6561	0.433122	-0.0861943	2.59605	2.92286	2.60765	-0.308535	3.23231	3.10989	3.16851	2.89537	3.98778	3.76449	2.66504	3.33778	0.0795031	0.276499	-2.69491	0.36631	-0.818037	0.0154968	-0.533614	-2.18443	2.85202	0.533394	-0.090541	0.538852	-0.0808844	-0.418815	0.0413904	0.0294268	-2.85105	-0.213509	-0.471842	-2.57596	-0.0640239
Neural Progenitor Cell;BI-2536;trt_cp;10 uM;24 h	-0.75044	2.18964	-0.443184	-0.239518	-0.286316	-0.719711	-0.0194209	-1.05821	-0.458851	-0.263019	0.963464	0.448336	-0.298872	0.155438	-0.0248912	0.181511	2.45125	0.305888	2.43745	2.26104	3.14792	3.32646	0.742633	0.394948	0.188096	-0.538534	-2.62699	0.440003	-0.543805	2.8353	-0.109287	-0.617091	2.40779	-0.174672	0.204718	-0.44173	-0.459224	2.25416	-0.0891124	0.102844	-3.20538	-2.22913	-2.73292	-2.70393	-2.40574
Neural Progenitor Cell;CAY-10577;trt_cp;10 uM;24 h	-0.206867	0.157654	-0.671909	-2.35652	0.505069	-0.0587127	-0.0382361	-0.0172593	0.874223	-0.194966	2.64223	0.412749	2.84603	2.78722	2.66417	2.873	-0.408408	-0.3247	2.73215	3.07627	0.683217	2.46769	0.826596	0.0689489	2.6216	-0.175162	-0.396022	3.33992	1.05289	3.11565	0.0601183	-0.0666626	0.140919	-2.89129	3.02285	0.521511	0.73143	0.999249	3.37299	3.17793	0.345498	-0.480678	3.00211	0.203357	0.789235
Neural Progenitor Cell;icariin;trt_cp;10 uM;24 h	-0.889784	-2.98181	-3.26306	-3.31342	-0.650687	-0.353447	-3.10177	-0.286801	-0.299312	-0.702327	0.564269	-0.0102122	-0.365878	-2.82394	0.531548	2.82887	-0.142576	-3.03126	-0.143174	0.102323	-2.69455	-0.247132	0.121988	-2.83547	0.298395	-0.279986	-0.11169	3.37601	2.49848	0.792927	-0.260209	-0.330095	-2.94756	-3.44255	2.75907	0.083603	3.40133	0.627977	3.1298	3.4361	0.218468	2.42889	3.4569	0.231131	0.314002
Epithelial Cell;nitrendipine;trt_cp;10 uM;24 h	0.722799	0.0150943	0.432227	-0.101532	0.229607	0.325018	-0.169875	-0.135003	0.346055	0.543092	0.461484	-0.26314	0.849085	0.657822	0.4839	0.44734	2.80186	0.0376707	-0.136854	-0.184784	0.045707	0.173424	0.0506625	0.010411	2.66669	2.60081	-2.16637	0.262207	-0.0587353	-2.19508	2.29315	-2.49099	-2.955	-3.19018	0.17454	-0.136869	0.20152	0.177101	-0.0556081	-0.0115497	3.06861	-2.16835	-0.13835	-0.0749354	2.84809
Epithelial Cell;BRD-K15107389;trt_cp;10 uM;6 h	0.133907	-0.228394	0.0787395	-0.236009	0.141896	0.368366	0.164438	-0.365759	-0.00637321	0.25049	-2.50274	-2.84542	-0.652874	-0.448307	-0.775034	0.026852	-0.396517	-0.752741	-0.336678	-2.7896	0.222969	-3.08057	0.949152	-0.947303	-0.604161	-0.154532	1.07205	1.77746	-0.301737	2.70466	3.00564	2.87384	0.387894	1.7779	2.45261	0.294329	0.180366	3.48398	-0.356451	0.346616	0.826426	4.11356	-2.7434	3.35639	0.774313
Neural Progenitor Cell;BRD-K91701366;trt_cp;10 uM;24 h	2.37073	0.59046	2.5089	-0.0100255	2.4146	2.73826	-0.113531	0.101785	0.662585	2.66615	0.615879	3.45793	0.547491	0.500865	0.780803	0.454714	3.37695	0.460036	0.45343	0.78932	0.65692	1.00508	0.262492	0.851321	2.46166	1.74325	-1.15918	-0.0338507	-0.167356	-0.0838203	0.796908	-0.740728	-0.531786	-0.0839921	-0.882132	-2.4809	-0.241587	-0.14885	-2.33332	-0.0894844	-0.155612	-1.0006	-0.47527	-0.764557	-0.50484
Epithelial Cell;BRD-A02241946;trt_cp;10 uM;24 h	2.89555	0.212716	2.76883	0.0692406	2.80004	2.49327	0.247048	0.105633	2.62094	3.07454	0.177153	0.118071	0.578349	0.313514	0.427957	0.525878	3.2107	0.434923	0.0805231	0.322048	0.275514	0.373353	-0.0586783	0.257425	2.57831	1.6949	-0.877448	-0.0833404	-0.356619	-0.790556	2.64381	-2.91266	-3.11023	-0.22655	-2.69976	0.0369781	0.215589	-0.0281167	0.186864	-0.266864	2.36252	-0.770844	-0.0706165	-2.9141	-0.482702
Neural Progenitor Cell;ZM-447439;trt_cp;10 uM;24 h	-2.91192	-2.54645	-2.98095	-2.81864	-2.64812	-2.92198	-2.27138	-0.207766	-2.22432	-2.7657	0.342659	0.654895	-0.416537	-0.373247	-0.00937132	0.163805	-2.77693	-0.395803	-0.396114	-0.162108	0.234829	-0.140052	0.317891	-0.166858	-0.148684	0.168832	0.56589	1.21261	0.0526346	1.16961	-0.416778	0.550397	1.10177	-3.31913	0.688673	0.0562272	0.178048	0.237342	-0.177216	0.768311	-0.31036	0.793529	0.277144	0.245363	0.777361
Epithelial Cell;TG-100115;trt_cp;10 uM;6 h	-0.128621	0.00288525	0.0285066	-0.366073	2.2575	0.233875	0.403864	-2.31488	0.410948	0.360762	-0.461629	2.26027	0.0765434	-0.174182	-0.203555	0.388106	-0.579797	-0.496922	-0.362476	-2.96354	0.401479	-3.03287	1.06888	-0.956171	-0.404756	0.426486	1.00677	1.64458	0.163517	2.9319	2.7243	3.12609	0.7788	-0.633236	2.7694	0.309088	0.0261732	3.85243	2.0895	0.805045	1.07394	3.30969	-3.05679	1.61137	0.880596
Epithelial Cell;CVF-SUMO-14;trt_cp;10 uM;6 h	0.240766	-2.58712	-0.315336	-2.1311	-0.125389	-2.16691	0.888935	0.462569	1.36132	-2.43234	-3.18428	-0.0573304	-0.38118	-0.204171	-1.22181	-3.00292	-0.520141	2.7737	-2.88909	-0.596577	-0.175651	-2.9922	-2.99113	-0.63226	-0.634479	0.368627	2.55091	2.63955	-1.63533	1.79422	0.0480245	-0.131258	3.16498	-1.73133	0.175489	-0.0147423	3.28453	0.55035	0.451879	0.105403	-0.0228996	2.4067	-0.491808	0.755453	3.29101
Epithelial Cell;BRD-K01815685;trt_cp;10 uM;24 h	-0.140496	-0.819877	-0.343067	-0.227734	-0.504698	-0.328654	-0.417897	-0.22493	-0.0680253	-0.287478	2.95166	-0.0162153	-0.222333	0.172262	2.95832	2.33696	-2.27911	-0.458001	-3.54075	-3.27492	-3.20817	-3.52016	-0.245219	-3.50774	-0.30621	0.818552	0.141475	3.26474	2.17368	1.17997	2.2084	-2.32702	-3.46855	-1.25602	2.29045	-0.984875	-0.179425	2.51931	2.76434	0.859737	-0.0745742	3.01127	-2.79081	-0.0274796	3.12765
Epithelial Cell;alclometasone;trt_cp;10 uM;24 h	3.01858	0.231169	2.77199	-2.47921	0.429669	0.394626	-0.292249	-0.133091	2.35002	2.68341	0.270054	-2.30934	0.762025	0.940037	-0.10285	-0.0842322	3.04544	-2.57147	-0.688667	-0.253802	0.754713	-0.0507881	-2.77974	-0.173748	-0.366409	2.27682	-0.0913658	2.63511	0.227679	-2.25635	-0.0285937	-2.62461	0.304697	0.361197	-0.201635	-2.77648	-0.178974	-3.27079	-0.314348	-0.103858	0.302254	0.201025	-0.373307	-2.72097	3.36805
Epithelial Cell;INCA-6;trt_cp;10 uM;6 h	3.05902	2.90788	2.68809	2.93847	3.57226	2.98016	3.54088	0.0257003	3.11108	2.65213	-2.49674	-0.950107	0.187043	-0.0381068	0.269016	-0.684667	3.01818	-2.8092	0.530069	0.234025	3.38198	0.266635	0.279476	-0.512202	0.301839	2.63059	2.78606	2.77555	-0.342485	0.0618628	1.18825	-0.804138	0.159054	3.53578	-0.753943	2.61592	0.131714	3.64418	3.08802	2.42143	-0.186063	0.101296	-0.548234	-0.0816403	0.463193
Epithelial Cell;entinostat;trt_cp;10 uM;6 h	-2.62793	-2.85766	-2.89337	-2.81585	-2.62731	-0.352943	-2.48007	2.11494	2.19563	-0.466064	-0.202344	2.89813	-0.224211	-0.598958	-0.247994	0.238611	-1.21879	-0.774118	-3.51856	-0.695175	-3.41395	-4.15978	-0.358474	-3.17253	0.0821061	2.00516	0.976914	1.90042	0.692189	2.72049	-0.514886	0.592062	0.467878	-2.98398	0.291845	-0.371483	-0.141226	0.766636	2.9496	0.515545	0.23597	1.19081	0.190075	0.299954	1.51573
Epithelial Cell;panobinostat;trt_cp;0.125 uM;6 h	-3.36085	-3.06007	-3.4456	-2.76877	-3.00418	-2.80519	-2.56708	0.0186925	-2.38224	-3.35436	-0.427689	0.426973	-1.07844	-1.29803	-0.350786	-0.455711	-2.92233	-0.9438	-0.940555	-1.01837	-3.57556	-3.99231	-0.540657	-3.6168	-0.463129	0.571185	2.57659	3.54144	2.43	2.32995	1.95783	0.850925	-0.264703	-0.525345	0.0437044	-0.425836	-0.0582434	0.865732	1.04274	0.522841	-0.541041	3.23126	-0.441584	0.092191	0.241894
Epithelial Cell;HDAC3-selective;trt_cp;0.125 uM;6 h	-2.71485	-2.86769	-3.10725	-0.190065	-2.86763	-2.80177	-0.523332	-2.16215	-2.18351	-2.98018	0.239227	-0.261735	-0.100515	-0.873222	0.472674	2.96644	-1.05416	-0.728461	-3.27313	-0.524848	-0.477569	-3.70603	0.460164	-3.22812	-0.462485	0.816138	1.29387	1.86309	2.21118	0.941021	-1.92331	-0.00934357	-0.309149	-0.793626	-2.22243	-3.51888	-3.84032	2.16524	0.956638	-0.256765	-0.211719	2.93325	-2.67927	0.297054	0.51485
Epithelial Cell;BRD-K84798689;trt_cp;0.125 uM;24 h	-2.35567	0.645067	0.174448	0.462368	2.42195	-0.206662	0.641802	2.56008	0.186459	-0.171974	-0.570505	-0.0592626	-0.68563	-3.19616	-2.71849	-0.261126	-0.828247	0.044718	3.09998	0.0418063	-0.0532161	2.98848	-2.92497	2.26087	0.433544	-2.69769	-0.448807	-2.85232	-2.0133	-0.149385	0.0615751	0.777358	0.301529	-0.624033	2.45137	0.00369957	-0.422637	-0.348995	2.81499	0.0360791	0.25182	0.188663	0.6006	-0.102342	-0.406325
Endothelial Cell;BVD-523;trt_cp;0.125 uM;24 h	2.78839	1.26705	1.14762	1.32025	2.76398	0.443645	1.0068	0.017671	0.540895	0.436259	-2.70411	-4.37552	-0.18686	-0.586921	-0.126511	-0.172603	-0.133944	1.01394	1.1859	2.5751	2.32103	2.62819	3.80587	2.22691	2.20679	-0.849103	-1.97605	3.34106	2.86781	0.195744	2.76853	-2.27454	-0.879818	-0.335237	-0.48972	0.471381	0.530902	-0.383017	3.06235	-0.253341	2.60164	-1.99059	-0.274517	2.53152	-2.78268
Epithelial Cell;BRD-K10436544;trt_cp;0.125 uM;6 h	-3.16335	-2.91472	-3.3982	-0.303747	-3.35446	-3.03608	-2.60006	-2.30233	-2.63257	-3.07564	0.0570044	-0.162157	-0.55538	-1.13776	0.2732	2.61969	-1.05528	-0.754503	-3.40262	-0.764837	-0.434569	-3.62068	0.358031	-3.3114	-2.94477	0.454381	1.14441	2.01599	0.852371	1.00436	-0.0778185	0.4508	-0.39266	-1.09438	-2.33732	-3.79953	-3.69924	0.16152	1.12808	-0.294378	-0.439147	3.01725	-2.92525	0.558572	0.472483
Epithelial Cell;tamoxifen;trt_cp;0.125 uM;24 h	-2.58179	-3.10806	-2.8658	-2.93524	-0.256977	-2.32824	-2.79787	-2.39573	-2.25228	-2.47769	-2.737	2.74432	-0.530545	-2.9498	-0.277485	-2.5542	-2.52922	-0.770063	-0.682921	-3.91706	-2.52331	-3.09374	-3.60463	0.218326	2.80003	-0.418979	-0.678377	3.09406	-2.52169	-0.0537394	-3.1835	2.75381	0.752642	-0.567169	3.58243	0.5623	0.542515	0.81888	-2.5781	0.31384	3.5993	1.25518	2.80365	0.954322	3.53677
Epithelial Cell;BRD-K31553917;trt_cp;0.125 uM;24 h	2.81265	2.79777	0.582066	0.419845	3.23183	2.73898	2.9952	2.22792	3.14112	3.04252	0.240623	-0.160086	3.46355	2.43279	-0.295916	0.458823	0.428284	-0.623965	3.28533	2.77531	3.99705	2.59872	0.532922	2.49541	2.96696	0.0504792	-0.413819	1.34714	0.0371114	0.634592	-0.727775	-2.4991	3.46018	-0.424237	0.683787	0.201328	0.081527	0.00227807	-2.97451	3.03739	1.08707	0.135217	3.08968	0.196331	1.16908
Endothelial Cell;resminostat;trt_cp;0.125 uM;24 h	2.68116	1.20609	0.94986	1.16441	0.784749	0.546283	0.853229	-0.100854	0.661954	0.41379	-2.62535	-3.93831	0.0641686	-2.62067	0.0244291	0.314064	-0.34743	0.972477	1.15698	2.69595	-2.17999	2.43425	3.737	0.248515	2.13287	-2.02045	-2.3211	3.43759	2.78642	0.322295	2.42648	-2.62934	-0.801804	-2.18876	-0.359107	0.881502	0.596181	-0.0242563	2.46877	0.299768	2.69297	-0.0888811	-0.0700225	2.82226	-2.85849
Neural Progenitor Cell;clobetasol;trt_cp;10 uM;24 h	-1.06549	-3.24265	-3.38665	-3.4531	-0.954622	-0.497776	-3.36577	-0.547915	-0.411995	-0.649615	0.618123	0.664764	-0.243313	-0.435274	0.484097	2.96733	-0.00393908	-0.487381	-0.0837	2.62771	-0.034108	-0.44614	0.276809	-0.756354	0.588387	-0.408516	-0.457807	3.15593	0.597013	0.705756	-0.479667	-0.51511	-0.359236	-3.12928	2.91812	-0.181683	3.2999	0.887445	2.87439	3.27805	0.0764346	0.357729	3.16652	0.247236	0.394948
Neural Progenitor Cell;KIN001-269;trt_cp;10 uM;24 h	0.532597	0.748327	0.479807	0.628329	0.599131	-0.520181	2.23085	-0.22255	0.260325	0.582289	0.175501	-0.0439301	0.0776426	0.185685	0.348384	-2.07709	0.130008	0.175655	0.82217	2.48518	1.4568	3.23394	0.705484	0.641593	-1.84145	0.363856	-0.213334	0.86283	-0.577498	2.32898	-0.620762	0.0896818	3.53942	0.360197	0.723858	0.491705	-0.137827	-0.306994	0.160863	2.53541	-0.274992	0.638271	-0.0273867	-0.0254284	2.68598
Neural Progenitor Cell;everolimus;trt_cp;10 uM;24 h	2.46182	2.61481	2.57387	2.22416	2.66087	2.00801	2.76588	-0.0503411	2.75157	2.3595	2.49593	2.74509	0.424612	-0.202795	0.340902	0.86981	0.280053	-0.0251427	2.56167	3.28839	0.924996	2.49133	1.04312	2.65219	2.23379	-0.241999	-0.30814	1.52395	-0.286161	2.85966	-0.549514	-0.187323	0.695373	0.539025	3.05014	-0.0125355	0.256092	0.0752892	0.061326	2.85117	-0.543234	-0.486512	0.392795	-0.1848	0.242163
Neural Progenitor Cell;RAF-265;trt_cp;10 uM;24 h	-2.46573	-0.120305	-0.55562	-0.236466	-2.52116	-0.855137	-0.112313	0.0112777	-0.691076	-0.389036	2.66924	0.603108	-0.275338	-0.295886	-0.0328907	2.48732	0.6922	0.230202	0.293115	2.74369	3.0593	2.81387	-2.77251	2.34478	0.842214	-0.0887751	0.211338	-0.0849903	-0.558319	2.99842	-0.360002	-2.41508	3.11516	-0.516394	0.232571	0.0379487	-0.178939	-2.83479	-2.89782	3.35476	-2.65156	-0.00510346	0.48263	-2.92909	2.60496
Embryonic Stem Cell;FR-180204;trt_cp;10 uM;24 h	-0.259439	0.305606	-0.0257551	0.0738094	0.404827	-0.202755	-0.137133	-0.021477	0.375936	-0.0186123	-0.373027	-3.60956	-3.59015	-3.49795	-0.529854	-2.90005	-0.367226	-2.68309	-0.502389	-3.31696	-0.598264	-0.285659	-3.447	-2.6687	-2.26754	-0.246345	0.570715	0.502725	-0.357299	0.854133	0.000544358	1.04263	-2.95116	-0.397059	-0.0323878	3.3694	3.44877	-0.226092	2.92065	2.21925	-3.37889	1.21463	-2.85111	0.114772	2.73399
Epithelial Cell;triphenyl-tin;trt_cp;10 uM;24 h	-0.237778	-0.387595	-0.492056	-0.523694	-0.24855	0.0297443	-0.00293972	-0.141866	0.171097	-0.174174	3.0032	0.354007	2.9927	2.22286	0.963539	3.48257	-2.92763	-3.19796	-3.11131	-0.809899	-3.25884	-3.15278	0.86239	-3.41697	0.272225	0.831998	0.148485	3.2265	0.879395	0.85259	0.138926	-0.399704	-2.69824	-4.02233	0.362078	-2.81195	-0.291433	0.869018	0.512456	3.46996	0.0159588	2.65843	0.110938	0.206898	0.719549
Epithelial Cell;EXO-1;trt_cp;10 uM;24 h	2.94898	0.10197	2.70639	-0.079714	0.447749	2.65303	-0.0488806	0.0345166	2.93371	3.06418	0.464525	-0.141117	0.798063	0.636359	0.406151	0.548537	2.94822	0.142633	-0.344738	-2.4293	0.199117	-0.0894159	-0.132704	-0.267409	2.34405	2.39928	-0.567749	2.95763	-1.89373	-0.541377	2.55957	-0.971754	-2.86113	-2.4903	-2.30945	0.142593	0.640546	2.17668	0.413965	-0.0566182	2.97341	0.0626056	-0.286565	0.080274	3.00693
Epithelial Cell;noreleagnine;trt_cp;10 uM;6 h	-0.528248	-2.28515	-2.7161	-0.436902	0.385351	-0.0570994	-2.38312	-0.464661	1.55312	-0.116848	-2.35146	-0.0488179	-0.184823	-2.12797	-2.15387	0.142339	2.44008	0.0793969	1.87476	0.605007	0.726238	1.95648	0.500597	0.753159	1.88646	0.258741	-2.24049	0.467853	-1.65305	1.78074	2.0747	-2.14701	-0.0845744	1.00543	-2.34877	-0.0789693	-2.88189	1.8736	-0.278519	-0.593793	-2.63328	-0.41738	-2.09198	-2.77834	-2.25602
Epithelial Cell;bicalutamide;trt_cp;10 uM;6 h	0.564008	0.254363	0.485263	-0.110054	1.05252	0.0673069	0.0229084	-0.404018	2.38414	0.438165	-0.242033	-0.171618	0.718828	1.84775	-0.177837	1.83749	2.69269	2.3009	-0.451977	-0.250889	0.0343407	-0.145137	-2.85611	0.564979	0.234293	-0.193388	-0.500152	0.983714	-0.812557	2.41851	2.67684	-0.109143	0.337998	0.632371	-0.481545	-0.094715	-0.0918712	2.82646	2.36899	-3.13646	0.0546483	2.13903	-3.23651	0.110973	2.77323
Epithelial Cell;SU-4312;trt_cp;10 uM;6 h	-0.0951452	-0.111064	-0.322883	0.0918895	0.0560952	0.0290215	0.203286	-0.0641416	0.310604	-0.0474434	-2.59404	-0.643611	-3.11457	-3.44746	-0.270538	0.287297	-0.0301879	-3.05504	0.357344	0.0180513	2.45748	-0.125438	0.586076	-2.02099	0.735885	2.04629	2.40337	3.01187	-0.275374	-0.0792279	0.888844	1.8051	-2.36138	2.37718	-2.26825	-0.310249	-3.55642	-2.63281	-0.0816696	-0.246816	-2.18437	0.255373	-0.729803	-3.13268	-2.79575
Epithelial Cell;anandamide;trt_cp;10 uM;24 h	3.0277	0.0227055	2.64649	-2.47988	2.21092	2.10033	-0.16533	-0.340245	2.43293	2.70168	2.67487	-2.93641	3.1411	0.978731	0.361586	2.21199	2.8269	-2.66179	-2.80442	-2.88643	0.530516	-0.170658	-2.78431	-2.16423	-0.404064	2.67629	2.30008	2.65736	-2.10959	0.0774399	1.94753	-2.31108	0.585416	0.29547	-0.599015	-2.5306	-3.06248	-3.15037	0.113074	-0.472354	0.284397	-0.613135	-2.45482	-2.70455	3.53872
Epithelial Cell;GW-3965;trt_cp;10 uM;24 h	0.246702	-2.63623	0.080353	-3.08485	-2.23929	-2.18569	-2.74751	-0.311279	-0.420212	0.0232874	2.10597	-0.570862	0.609542	0.375088	0.0141786	-0.138209	2.48806	-0.10897	-3.07067	-3.21997	-0.0532251	-0.528362	-3.26627	-0.548374	-1.65931	2.33451	0.481156	-0.0572899	-1.84252	-2.74951	0.0555659	-2.04814	-2.4605	-0.310272	-0.464094	-0.159044	0.125078	-2.99178	0.68573	-0.400835	2.80622	0.0061702	-0.0122661	-2.63242	3.66849
Epithelial Cell;BRD-K64024097;trt_cp;10 uM;6 h	-2.57902	-0.965645	-3.01951	-0.103161	-2.77015	-0.601476	-0.164924	-2.22168	-0.469076	-0.559711	-0.355832	-2.78376	-0.726179	-1.11531	-0.150754	0.415562	-0.820589	-0.557223	-3.55866	-0.709916	-0.524891	-4.05075	0.865398	-3.49257	-2.88001	0.334322	1.2303	1.60481	2.39825	3.10939	2.44204	0.356605	-0.0902716	-2.51816	-2.42862	-2.95668	-3.29286	2.9505	2.99274	-0.0216929	-0.232815	3.71272	-3.21884	0.944544	2.31267
Neural Progenitor Cell;RG-108;trt_cp;10 uM;24 h	-0.187602	2.43709	1.77601	2.41563	0.400981	-2.14741	2.31922	-0.563255	0.261557	1.66946	2.89453	0.394732	-0.136382	0.0643915	0.165403	2.07142	0.17903	0.15306	0.571743	2.49852	1.01811	3.07356	0.766774	0.589719	0.276951	-0.00414645	-0.18924	0.844912	-0.436036	2.6782	-0.567812	0.163515	3.06956	-0.30473	2.36312	-0.188275	-0.511936	0.292227	-0.222329	2.79672	-2.62073	-0.232876	-0.256757	-0.407748	0.693472
Neural Progenitor Cell;BRD-K09991945;trt_cp;10 uM;24 h	0.0839247	0.29932	0.0308901	-0.15539	0.524779	-0.0670425	-0.189338	-2.49201	0.125103	0.449657	0.0672206	-0.0876961	-0.264109	-0.320332	-0.0977845	-0.265317	0.432398	-0.117494	0.214138	-0.0808775	1.10295	0.60666	0.564038	0.578457	-2.23822	-0.307103	-0.226186	0.92298	-0.661978	2.93379	-0.625684	0.411125	1.04892	0.343617	-0.455791	-0.198949	-0.620795	-0.23912	0.0989956	-0.14464	-3.40193	0.344488	-2.77806	-0.330164	2.08747
Neural Progenitor Cell;A-769662;trt_cp;10 uM;24 h	1.95233	2.1963	0.718953	1.96919	0.467513	0.364488	-0.109135	-0.53351	0.461144	2.29834	0.842749	0.373334	0.194335	2.59696	2.8864	0.294462	2.89684	-0.0215721	0.0388704	0.330816	3.47471	3.72286	0.687432	2.93929	1.89124	-0.027428	-2.67509	0.37109	-0.574138	0.364684	-0.0943198	0.418038	1.07289	-0.0932043	2.94215	0.137513	-0.402064	-0.0507436	-0.308752	2.37276	-0.149036	0.0739259	-0.12912	-0.340774	0.41554
Epithelial Cell;BRD-K25538169;trt_cp;10 uM;24 h	2.57492	2.84831	2.32445	0.631203	2.92141	2.4022	2.92493	2.97195	2.80507	2.53661	-0.115898	-3.02382	0.0236439	-2.86264	-0.25392	0.364999	-0.291854	-0.834044	3.03975	-2.72089	3.61256	3.00834	0.538562	-0.635818	2.94612	2.11502	1.9115	1.40472	-0.124412	0.44253	-0.274936	2.02113	3.66313	-2.47379	0.97474	0.433619	0.0436681	-0.0754187	2.04645	1.25781	0.747552	0.632951	0.405499	0.502132	3.44288
Neural Progenitor Cell;ALW-II-38-3;trt_cp;10 uM;24 h	-0.392207	-2.10018	-1.86194	-2.50047	-2.48297	-0.241446	-2.20307	-2.33334	-1.84458	-0.200194	0.809585	0.90814	0.136416	0.218525	0.60932	0.597914	-0.410433	-0.292468	-0.379613	-2.2885	0.390822	-0.350778	-0.0386694	0.454233	0.232369	-0.13005	-0.253973	0.816965	-0.151399	1.02271	-0.0358848	0.297195	1.15078	-3.04732	0.716305	-0.41294	-0.238896	-0.0902109	-0.600035	0.33974	-0.340095	0.0188698	0.0242202	0.41656	2.90423
Embryonic Stem Cell;GDC-0068;trt_cp;10 uM;24 h	-0.402348	-0.079422	-0.346548	-0.555909	-0.220791	-0.189861	-0.578406	-2.29944	-0.0465739	-0.105385	-0.853869	-3.29993	-3.76382	-3.51465	-2.93596	-2.9496	-0.64074	-2.78911	-0.946203	-3.66055	-3.59266	-0.797993	-3.76213	-1.34171	-2.1275	0.296145	0.84547	0.302976	-2.24529	3.0376	0.370755	1.44892	-2.97166	-0.389317	0.137182	2.90661	3.52008	-0.126734	2.33729	-0.0352225	-1.04186	2.89072	-3.18404	0.431259	2.57064
Epithelial Cell;lacosamide;trt_cp;10 uM;24 h	-2.34547	0.13912	-2.32738	0.14936	0.106713	0.148365	0.154738	-2.80662	-0.0974592	0.150834	-0.186899	3.21968	0.387204	0.223389	3.0561	-2.91608	0.3588	-0.815023	2.52021	-3.21529	3.00633	-0.533167	3.06422	-0.10295	3.01882	-2.13115	-0.820041	2.82319	-0.0866239	-0.226331	0.235971	-0.0900423	1.24242	-0.324578	3.50989	3.20323	0.217684	4.18157	-0.48648	-0.190471	3.13978	-3.08687	-2.51676	3.1213	-2.43383
Embryonic Stem Cell;AST-1306;trt_cp;10 uM;24 h	-0.0758137	0.0791774	0.0226888	0.0558026	0.598042	0.0603862	-0.0639449	0.09809	0.348665	0.0672951	0.238994	-3.31948	-3.46612	-3.07585	0.0330392	-2.7877	0.000157131	0.103524	-2.54239	-0.549887	-2.79533	0.0410872	-3.18987	-2.79579	-2.45462	-0.127045	0.0662756	0.00828104	-2.27537	0.460915	0.272851	0.670227	-3.16125	-0.14915	-2.66194	0.584494	2.99964	-2.62519	2.34115	-0.26421	-4.08839	2.5544	-2.89372	-2.79331	-0.424454
Epithelial Cell;BRD-K76052538;trt_cp;10 uM;6 h	0.182517	-0.20925	-0.0900593	-2.50423	-0.132838	2.69272	0.248311	-0.276205	0.206156	2.34598	-2.82633	-0.353529	-0.490311	-0.507117	-0.517099	-0.102275	-2.90216	-0.516093	-3.1663	-3.16016	-2.48799	-3.55872	0.55214	-3.2883	-0.183468	0.302528	0.627669	4.03996	0.336247	0.291388	3.29567	2.65235	0.241099	-2.93939	3.18382	0.75515	0.941275	3.64894	-0.149528	3.45649	1.17503	3.09034	-0.563824	1.44682	0.839624
Neural Progenitor Cell;BRD-K21037590;trt_cp;10 uM;24 h	-0.132376	-0.174293	0.0230333	-0.339991	0.232299	0.189618	-0.476789	-0.473735	-0.0996791	0.180957	0.477494	3.71412	0.747629	0.92168	1.00565	0.48634	1.14084	0.708011	0.399796	0.763406	0.2392	0.756839	0.531756	0.507708	2.4449	2.23035	-2.63825	0.309967	0.176534	-0.0106597	0.447513	-0.85308	-2.6222	-2.90447	-0.539671	-0.215764	-0.297409	0.414403	-2.32106	0.0578675	0.359152	-0.7777	-0.487014	-0.118009	-0.437717
Epithelial Cell;benzofuran;trt_cp;10 uM;24 h	-0.194312	-0.401212	-0.567189	-0.482324	-0.351776	0.0651275	-0.191167	0.0684146	0.0104848	-0.311814	3.01162	0.477774	3.31844	2.66692	1.02795	3.08573	-2.8095	-3.15288	-2.92828	-0.483324	-3.24937	-3.07585	0.480943	-2.90764	0.646745	0.804991	-0.136614	1.70257	1.16095	1.12383	0.25688	-2.57228	-0.434487	-4.18692	0.0619846	-2.78154	-0.272148	3.04356	0.577101	3.57818	-0.302711	2.23422	0.121634	-0.157762	0.811605
Epithelial Cell;triamcinolone;trt_cp;10 uM;24 h	3.53256	2.63401	3.22095	0.02024	2.78359	2.85708	2.49393	-0.116509	2.98353	3.21391	0.0274725	-0.0280794	0.432361	0.506816	0.224904	-0.0397411	3.21182	0.0347699	-0.246954	0.423861	0.794642	0.0929487	-0.891938	0.1382	2.42698	2.13955	-0.264411	2.48868	0.0236642	-2.17171	0.388815	-1.51175	-2.60823	0.353213	-0.185455	0.251463	0.363385	-0.551895	-2.33679	-0.256196	2.45738	-0.502651	-0.0133001	-2.63231	3.06508
Epithelial Cell;ZM-306416;trt_cp;10 uM;24 h	3.97839	2.5095	3.30711	0.0879659	2.77111	3.11779	0.449743	0.578777	3.03358	3.39698	0.62166	0.194705	0.824724	1.22524	0.615418	0.119155	3.31653	0.458619	0.278476	0.465862	1.04207	0.240203	-2.89027	-0.0712621	0.0418176	2.54019	-0.0355904	0.101866	0.277853	-1.8662	-1.91858	-3.08507	-2.25104	1.08949	-2.51308	-0.0765495	0.0427546	-2.53474	-0.52757	0.0585974	-0.0922025	-0.683235	-0.115425	-2.95882	3.00551
Neural Progenitor Cell;BRD-K83161876;trt_cp;10 uM;6 h	0.236151	-0.386397	-0.183389	-3.35739	-0.550724	0.0687916	-0.64146	-0.0848312	-0.212386	0.51409	3.14183	0.108773	0.40256	0.869846	0.587796	2.96321	2.0375	0.0789513	-2.93283	-3.10189	-0.227246	0.136893	-3.24656	-0.434632	0.0963045	-1.71837	-2.79211	2.85405	0.602907	0.753368	0.680647	0.696628	-0.0958995	-3.06981	3.79904	2.96206	4.3409	2.65348	-0.65579	3.11956	2.99927	2.29199	3.0342	0.645824	3.10783
Neural Progenitor Cell;rotenonic-acid;trt_cp;10 uM;24 h	-0.502659	-0.228023	-0.789085	-0.173461	0.286829	-0.556365	-0.333384	0.276614	0.354629	-0.434899	0.648236	0.509865	2.42976	-2.29909	0.696768	0.708588	-0.185124	-0.277646	0.651441	3.01157	0.664005	2.30836	1.1273	-0.648124	0.870834	-0.644868	-0.261526	3.36246	2.57046	0.854845	-0.526639	-0.613902	-0.10821	-3.45394	0.760457	0.162671	0.38807	0.881898	3.61822	3.26899	-0.273729	-0.661489	2.50347	0.0293513	0.391623
Epithelial Cell;danazol;trt_cp;10 uM;24 h	2.86791	2.20095	2.54721	-2.32514	2.41663	2.10788	-0.0489832	-1.9986	2.6846	2.85317	0.472286	-0.921762	3.0993	1.14507	0.127427	0.216436	3.10824	0.040331	-0.578245	-0.630035	0.494389	-0.115588	-0.307583	-1.86516	-0.354736	2.74525	2.23151	0.0458256	-2.2512	0.195161	0.262076	-0.260994	0.290328	0.299069	-0.505976	-2.45971	-0.0494497	-2.85341	-0.609916	-0.560487	0.452139	-0.169079	-2.16587	-0.170303	3.53982
Epithelial Cell;glimepiride;trt_cp;10 uM;24 h	2.67967	-0.0376284	2.04134	-0.223616	1.96403	0.252868	0.0962878	-2.0994	2.09188	2.34561	0.112795	-0.795197	2.01354	0.296491	0.136468	0.542143	0.306462	0.0342481	-0.583793	-2.84711	-0.428543	-0.506021	-0.329999	-2.89962	-0.0155117	2.34542	2.42886	-0.296296	-2.08879	0.453701	2.38375	0.597762	0.258015	-2.94309	-0.218363	-2.65204	0.00172458	-2.51125	0.231663	-0.634086	3.03879	0.0631104	-0.466441	-0.0491737	3.20719
Neural Progenitor Cell;meptazinol;trt_cp;10 uM;24 h	-0.487337	-0.66851	-0.911975	-0.974749	-0.534605	-0.291265	-0.784926	0.153806	-0.0813302	-0.313549	3.26003	0.80789	0.190222	-0.227965	0.858073	2.93174	0.194195	-2.60123	-2.52183	2.78679	-2.67173	-0.0427369	0.881602	-0.967977	0.871032	-0.144925	-2.40851	3.39513	0.623227	0.794064	-0.0333786	-3.22255	-0.255493	-3.51979	2.90283	-0.409622	2.76973	3.17612	0.651431	3.14491	0.34506	-2.53762	2.75579	0.0673547	0.723279
Neural Progenitor Cell;nadolol;trt_cp;10 uM;24 h	-0.940329	-3.16683	-1.57346	-1.26516	-0.951776	-0.689683	-3.45292	-0.329297	-0.524194	-0.954333	0.406963	0.682346	-2.64453	-2.81892	0.251104	2.54834	-2.44375	-2.5699	-3.02392	0.109061	-3.30257	-0.53609	0.25494	-3.2863	0.283124	-0.581083	-0.221839	3.28467	0.476991	0.422428	-0.515492	-0.68958	-0.394871	-3.51966	0.794592	-0.48959	2.8231	0.552537	0.808498	3.16755	-0.20394	-0.134862	2.35756	0.0291663	0.768382
Adipose-derived Stem Cell;coumaric-acid;trt_cp;10 uM;24 h	0.223468	0.0668613	-0.386455	3.24106	-0.367865	0.31875	0.239817	0.0390474	0.264486	-0.27289	0.130301	0.610646	0.138077	0.0583162	-0.256906	0.0259881	0.375723	0.397755	-0.0703916	3.13753	-2.79471	-2.3008	3.17008	-0.255324	0.549973	0.210509	-0.33198	2.70395	0.250059	-2.32973	2.00946	-3.35136	-3.28475	-1.10529	-0.126065	3.04208	3.08254	2.74405	0.0335516	2.32454	0.298208	-0.110498	3.15006	0.192024	-2.93643
Neural Progenitor Cell;serdemetan;trt_cp;10 uM;24 h	-0.831144	2.2704	-0.731974	-0.154925	-0.0316934	-2.394	-0.094718	-0.154314	-1.88584	-0.78144	2.42624	-0.126077	0.132745	0.251719	0.342662	-0.119767	2.23658	0.620158	2.73544	2.60917	3.45046	3.59586	0.590562	2.90635	0.500087	0.259629	-0.0966772	0.650275	-0.516969	2.74678	-0.652081	0.0396105	3.26284	0.242371	0.114019	0.396793	0.0665071	-2.5065	-0.117298	-0.152195	-3.03257	2.07039	0.227922	-2.73295	2.11451
Neural Progenitor Cell;C-646;trt_cp;10 uM;24 h	1.8704	2.33831	0.462684	2.04408	0.0634859	-0.205465	2.33715	0.295018	0.114259	0.245355	2.61467	0.292119	0.38847	0.282326	0.306404	2.28707	2.19696	0.134944	2.9606	2.69281	1.25563	3.17546	0.258115	3.18767	0.0729365	0.565075	0.247269	0.394511	-0.4205	2.66573	-0.701117	0.63066	1.17847	0.407468	0.751073	0.373188	0.178431	-0.160263	-0.598884	0.741855	0.0686644	0.48682	3.05912	-0.236678	0.634272
[truncated: 701 more rows]
